# Supplementary material for: Network Analyses of Brain Tumor Patients’ Multiomic Data Reveals Pharmacological Opportunities to Alter Cell State Transitions
Source: bioRxiv preprint, doi:10.1101/2024.05.08.593202, version 1 (2024-05-10)
Supplement: Differentially Expressed Genes [file 593202_file03.xlsx]

## Sheet: MES DEGs
Gene	baseMean	log2FoldChange	lfcSE	stat	pvalue	padj
A1BG	74.7667	-2.15737	0.330807	-6.52152	6.95988e-11	8.46107e-11
A2M	49962.8	5.77134	0.381743	15.1184	1.22471e-51	2.81677e-51
A2M-AS1	878.167	-5.83418	0.286457	-20.3667	3.30307e-92	1.30012e-91
A2ML1-AS1	46.1639	-8.4805	0.249903	-33.9352	2.01691e-252	2.1725e-251
A2ML1-AS2	510.2	-13.3675	0.364448	-36.6788	1.58794e-294	2.1871e-293
A2MP1	3340.82	-11.7456	0.307421	-38.2069	0	0
A3GALT2	58.0587	-3.22402	0.370182	-8.7093	3.05765e-18	4.19357e-18
A4GALT	689.109	-4.68981	0.362895	-12.9233	3.32499e-38	6.40422e-38
A4GNT	118.962	-10.3759	0.267124	-38.8429	0	0
AA06	2309.81	-12.7768	0.828865	-15.4148	1.30139e-53	3.08431e-53
AAAS	1461.65	-0.401882	0.119159	-3.37265	0.00074449	0.000813281
AACS	948.41	1.40355	0.141947	9.88781	4.70213e-23	7.13611e-23
AACSP1	252.963	-7.95117	0.551756	-14.4107	4.43456e-47	9.58863e-47
AADAC	892.781	-12.4242	0.649435	-19.1308	1.39997e-81	4.98367e-81
AADACL2	272.146	-13.1086	0.325866	-40.2271	0	0
AADACL2-AS1	195.87	-9.09818	0.670401	-13.5713	5.92999e-42	1.19669e-41
AADACL3	1113.89	-13.9297	0.435273	-32.0023	1.01424e-224	9.24027e-224
AADACL4	2946.18	-16.2513	0.331923	-48.9612	0	0
AADACP1	458.903	-9.29621	0.461176	-20.1576	2.30767e-90	8.96241e-90
AADAT	569.7	-2.41367	0.211706	-11.401	4.13266e-30	7.1108e-30
AAED1	494.963	1.333	0.161064	8.27622	1.27152e-16	1.6955e-16
AAGAB	1372.18	5.22888	0.164801	31.7285	6.28353e-221	5.60233e-220
AAK1	4040.01	8.15555	0.204725	39.8366	0	0
AAMDC	349.694	-0.549217	0.14768	-3.71896	0.000200043	0.000220858
AAMP	5944.73	-3.04097	0.124438	-24.4376	6.81679e-132	3.58611e-131
AANAT	1620.19	-10.8701	0.163981	-66.289	0	0
AAR2	1039.75	3.49854	0.141582	24.7103	8.29643e-135	4.45543e-134
AARD	1120.63	-10.5501	0.670274	-15.74	8.0454e-56	1.97422e-55
AARS	6291.91	1.96142	0.145578	13.4733	2.24579e-41	4.5027e-41
AARSD1	527.402	-3.25511	0.177594	-18.329	4.86085e-75	1.59082e-74
AARSP1	241.226	-13.3476	1.42837	-9.34463	9.22145e-21	1.33212e-20
AASDH	1319.12	-1.07338	0.158904	-6.75491	1.42921e-11	1.75526e-11
AASDHPPT	1736.35	0.540907	0.12179	4.4413	8.94159e-06	1.01058e-05
AASS	3107.36	5.99758	0.187319	32.018	6.13406e-225	5.60204e-224
AATBC	123.408	-4.48448	0.390822	-11.4745	1.77195e-30	3.06695e-30
AATF	1453.43	0.311614	0.115677	2.69383	0.00706366	0.00756763
AATK	1073.69	-1.78599	0.404423	-4.41614	1.00479e-05	1.13434e-05
AATK-AS1	344.968	-9.94316	0.371224	-26.7848	4.8636e-158	3.05272e-157
AB015752.3	256.621	-6.02964	0.215631	-27.9628	4.60212e-172	3.13968e-171
AB019438.66	219.516	-12.6806	1.02879	-12.3258	6.57654e-35	1.21158e-34
ABALON	30.3607	-3.66753	0.237053	-15.4713	5.41977e-54	1.29218e-53
ABAT	7103.54	3.22931	0.303616	10.6362	2.02283e-26	3.27219e-26
ABBA01017803.1	1328.8	-10.6357	0.170763	-62.2837	0	0
ABC12-47964100C23.1	486.426	-14.2415	0.323428	-44.0331	0	0
ABC12-49244600F4.4	395.068	-11.6842	0.504345	-23.1671	9.78238e-119	4.68588e-118
ABC7-42391500H16.2	354.068	-13.8425	0.355027	-38.9899	0	0
ABC7-42418200C9.1	501.124	-12.4099	1.39969	-8.86617	7.5706e-19	1.05091e-18
ABC7-43041300I9.1	313.636	-10.8938	0.350132	-31.1133	1.58952e-212	1.35913e-211
ABC7-481722F1.1	479.295	-13.7488	0.370236	-37.1353	7.57226e-302	1.09334e-300
ABCA1	25094.4	3.60337	0.230981	15.6002	7.2517e-55	1.75183e-54
ABCA10	729.541	-3.72673	0.385865	-9.65812	4.54102e-22	6.73494e-22
ABCA11P	547.98	-4.93199	0.238453	-20.6833	4.90229e-95	1.98118e-94
ABCA12	384.562	-4.86048	0.300331	-16.1838	6.56616e-59	1.69176e-58
ABCA17P	262.384	-2.93716	0.314712	-9.33284	1.03074e-20	1.48695e-20
ABCA2	4918.87	6.3111	0.273897	23.0419	1.77491e-117	8.42376e-117
ABCA3	3275.4	0.504001	0.178651	2.82114	0.00478528	0.00514493
ABCA4	103.452	-3.29811	0.333248	-9.89684	4.29625e-23	6.52729e-23
ABCA5	2169.75	-1.02383	0.342732	-2.98727	0.00281482	0.00304143
ABCA7	792.313	-1.51175	0.328174	-4.60654	4.09415e-06	4.6492e-06
ABCA8	2347	1.48981	0.425814	3.49872	0.000467496	0.00051246
ABCA9-AS1	36.7842	-7.26732	0.3178	-22.8676	9.77566e-116	4.57759e-115
ABCB1	756.668	1.54614	0.317466	4.87024	1.11463e-06	1.27482e-06
ABCB10	967.807	-1.81521	0.102199	-17.7616	1.40265e-70	4.33523e-70
ABCB10P1	271.691	-11.1715	0.470385	-23.7497	1.10741e-124	5.54083e-124
ABCB10P3	127.46	-12.1324	0.34055	-35.626	5.54401e-278	6.85648e-277
ABCB10P4	2172.29	-15.635	0.310088	-50.4211	0	0
ABCB11	90.6236	-4.00099	0.724398	-5.52319	3.32894e-08	3.89358e-08
ABCB4	344.758	-1.27145	0.333213	-3.81571	0.000135791	0.000150305
ABCB5	102.587	-6.51892	0.460051	-14.17	1.40529e-45	2.98292e-45
ABCB6	669.882	-1.93572	0.181991	-10.6363	2.01913e-26	3.26642e-26
ABCB7	1576.54	-1.08182	0.10685	-10.1246	4.29737e-24	6.65004e-24
ABCB8	2313.95	-1.3443	0.134136	-10.0219	1.22082e-23	1.87319e-23
ABCB9	3518.37	-4.94047	0.205953	-23.9883	3.68189e-127	1.87612e-126
ABCC1	1781.04	3.49911	0.22448	15.5876	8.83372e-55	2.13029e-54
ABCC10	1023.97	2.18753	0.150899	14.4966	1.27218e-47	2.76991e-47
ABCC11	507.921	-5.98618	0.292019	-20.4993	2.18606e-93	8.69828e-93
ABCC12	978.732	-9.85517	0.499705	-19.722	1.3969e-86	5.2305e-86
ABCC13	2558.4	-11.7909	0.824162	-14.3066	1.99059e-46	4.27009e-46
ABCC2	760.98	-6.16781	0.227126	-27.1559	2.15448e-162	1.38911e-161
ABCC3	5238.07	1.01639	0.489003	2.07849	0.0376639	0.039669
ABCC4	5443.67	-4.51865	0.186605	-24.215	1.54573e-129	7.9925e-129
ABCC5	3215.46	3.1407	0.154408	20.3403	5.66339e-92	2.22383e-91
ABCC5-AS1	84.4528	-8.95612	0.53824	-16.6397	3.59694e-62	9.76301e-62
ABCC6	421.587	-4.48852	0.300176	-14.953	1.4894e-50	3.36809e-50
ABCC6P1	84.6765	-3.19647	0.464122	-6.88713	5.6931e-12	7.03127e-12
ABCC8	414.453	1.7706	0.505703	3.50126	0.000463064	0.000507623
ABCC9	1369.9	1.41008	0.408077	3.45542	0.000549426	0.000601769
ABCD1	531.767	2.44749	0.225487	10.8543	1.90345e-27	3.13896e-27
ABCD2	724.638	2.48312	0.390807	6.35383	2.10021e-10	2.53469e-10
ABCD3	3093.23	5.46928	0.187509	29.168	4.93253e-187	3.68231e-186
ABCD4	1615.94	8.16493	0.293552	27.8143	2.91549e-170	1.96657e-169
ABCE1	2199.91	8.93313	0.310754	28.7466	9.99067e-182	7.21661e-181
ABCF1	2227.68	2.96275	0.389225	7.61193	2.70039e-14	3.46314e-14
ABCF2	2572.91	8.59319	0.25215	34.0797	1.47279e-254	1.60414e-253
ABCF3	1613.67	8.79035	0.316103	27.8085	3.422e-170	2.30704e-169
ABCG1	1238.43	11.6291	0.778659	14.9347	1.95891e-50	4.42564e-50
ABCG2	1128.2	9.3349	0.538464	17.3362	2.50968e-67	7.39185e-67
ABCG4	52.2477	2.86557	0.447588	6.40226	1.53094e-10	1.85113e-10
ABHD1	45.4304	6.13398	0.760601	8.06465	7.3448e-16	9.66938e-16
ABHD10	778.735	11.3205	0.73191	15.4671	5.78456e-54	1.37828e-53
ABHD11	430.299	10.8256	0.737308	14.6826	8.33458e-49	1.84509e-48
ABHD12	1863.5	12.9399	0.73222	17.6721	6.87422e-70	2.10265e-69
ABHD13	539.729	5.52939	0.258018	21.4302	6.98744e-102	2.97958e-101
ABHD14A	186.929	3.61224	0.24221	14.9137	2.68589e-50	6.05765e-50
ABHD14B	539.409	10.7907	0.745296	14.4785	1.65777e-47	3.60527e-47
ABHD15	431.31	5.80668	0.298424	19.4578	2.50331e-84	9.16196e-84
ABHD16A	240.174	9.98427	0.733181	13.6177	3.14153e-42	6.36709e-42
ABHD17A	1664.51	12.4164	0.734817	16.8972	4.71615e-64	1.31903e-63
ABHD17B	520.879	7.19508	0.353723	20.341	5.57458e-92	2.18928e-91
ABHD17C	748.211	9.38259	0.633404	14.813	1.20804e-49	2.70185e-49
ABHD2	11628.6	12.9918	0.543435	23.9068	2.6039e-126	1.31916e-125
ABHD3	478.623	10.9792	0.74068	14.8232	1.03741e-49	2.32241e-49
ABHD4	1204.42	12.3103	0.739898	16.6378	3.70912e-62	1.00644e-61
ABHD5	774.816	5.07039	0.200825	25.2478	1.19749e-140	6.68624e-140
ABHD6	619.04	1.99479	0.195707	10.1927	2.13671e-24	3.32745e-24
ABHD8	488.682	6.63261	0.321871	20.6064	2.40489e-94	9.63897e-94
ABI1	1803.38	10.0104	0.455004	22.0006	2.84066e-107	1.25867e-106
ABI2	6432.83	7.1946	0.18401	39.0991	0	0
ABI3	534.811	11.139	0.814679	13.6728	1.47507e-42	3.00232e-42
ABI3BP	663.052	11.0884	0.911487	12.1652	4.7648e-34	8.68078e-34
ABL1	4087.4	3.10486	0.556957	5.57469	2.47969e-08	2.90624e-08
ABL2	3825.55	5.2541	0.150993	34.797	2.70288e-265	3.11287e-264
ABLIM1	5351.75	13.7406	0.749959	18.3218	5.5473e-75	1.81479e-74
ABLIM2	272.966	8.43632	0.726234	11.6165	3.39659e-31	5.93754e-31
ABLIM3	793.997	11.7091	0.781317	14.9863	9.0201e-51	2.04753e-50
ABR	5495.15	7.59887	0.230741	32.9325	7.53366e-238	7.43274e-237
ABRACL	179.479	8.48059	0.748075	11.3366	8.64829e-30	1.48223e-29
ABT1	507.182	9.63696	0.710224	13.5689	6.12396e-42	1.23546e-41
ABTB1	555.071	11.1927	0.747004	14.9835	9.41111e-51	2.13537e-50
ABTB2	323.843	10.4154	0.780948	13.3369	1.41189e-40	2.80448e-40
AC000068.5	38.7441	6.27156	0.786813	7.97084	1.57595e-15	2.06367e-15
AC000120.7	160.457	7.66593	0.656998	11.6681	1.85493e-31	3.25492e-31
AC000123.2	602.575	10.9504	0.737532	14.8473	7.24115e-50	1.62395e-49
AC000123.3	119.639	1.74915	0.203374	8.60067	7.92492e-18	1.07925e-17
AC002044.1	57.1726	7.91169	0.769016	10.2881	7.97581e-25	1.25236e-24
AC002044.3	26.3098	0.717934	0.298589	2.40442	0.0161982	0.0172046
AC002064.5	22.6432	6.21763	0.843327	7.37273	1.67168e-13	2.11458e-13
AC002117.1	92.8883	5.86835	0.505716	11.604	3.93132e-31	6.86682e-31
AC002127.2	260.123	-8.29608	0.441758	-18.7797	1.10717e-78	3.80731e-78
AC002310.12	56.8892	2.80289	0.285655	9.81215	9.98162e-23	1.50425e-22
AC002310.17	35.3652	-10.1621	0.35394	-28.7113	2.75414e-181	1.98396e-180
AC002429.5	57.707	6.8347	0.980262	6.97232	3.11753e-12	3.86575e-12
AC002467.7	45.6185	7.22616	0.749696	9.63879	5.48317e-22	8.11488e-22
AC002480.3	61.8217	7.30331	0.846411	8.62856	6.21282e-18	8.48017e-18
AC003002.6	43.9254	7.5318	0.75975	9.91353	3.63569e-23	5.53362e-23
AC003080.4	216.209	7.58332	0.579858	13.0779	4.4047e-39	8.58381e-39
AC003090.1	79.348	4.19002	0.59466	7.04608	1.84028e-12	2.29016e-12
AC003104.1	133.239	9.13346	0.753175	12.1266	7.63481e-34	1.38768e-33
AC003956.1	54.5287	-9.54838	0.529211	-18.0427	9.00975e-73	2.8638e-72
AC003973.3	22.3761	6.19891	1.056	5.87019	4.35305e-09	5.15724e-09
AC003991.3	146.749	7.82221	0.769937	10.1595	3.00468e-24	4.66639e-24
AC004016.1	71.0988	-11.289	0.390451	-28.9128	8.25243e-184	6.04573e-183
AC004019.10	65.2506	4.69191	0.508138	9.23353	2.61849e-20	3.75152e-20
AC004067.5	29.8719	6.61585	0.76065	8.69762	3.38922e-18	4.64613e-18
AC004076.5	118.554	6.71369	0.596225	11.2603	2.05998e-29	3.51206e-29
AC004158.3	648.282	7.88577	0.475134	16.597	7.33097e-62	1.9798e-61
AC004221.2	37.2933	-2.94874	0.295337	-9.98433	1.78499e-23	2.73071e-23
AC004381.6	233.393	2.75054	0.262418	10.4815	1.05033e-25	1.67637e-25
AC004520.1	814.674	-15.1034	1.40969	-10.714	8.75147e-27	1.42487e-26
AC004538.3	37.4561	3.79152	0.456435	8.3068	9.83198e-17	1.31418e-16
AC004540.4	130.387	5.47429	0.722214	7.57987	3.45896e-14	4.42648e-14
AC004540.5	147.176	9.27752	0.847358	10.9488	6.73593e-28	1.12101e-27
AC004702.2	36.9392	2.68853	0.343007	7.83812	4.57331e-15	5.94071e-15
AC004893.11	311.837	6.68423	0.366728	18.2267	3.17059e-74	1.02716e-73
AC004932.1	23.5122	4.60271	0.627802	7.33148	2.27631e-13	2.87262e-13
AC004941.3	47.7944	-6.19556	0.400405	-15.4733	5.25783e-54	1.2538e-53
AC004951.5	77.2403	2.25678	0.241664	9.33852	9.76942e-21	1.41027e-20
AC004951.6	127.353	3.46009	0.263012	13.1556	1.57942e-39	3.09677e-39
AC004967.7	223.753	4.38962	0.230204	19.0684	4.62242e-81	1.63489e-80
AC004980.7	603.394	10.5916	0.740323	14.3067	1.98694e-46	4.26262e-46
AC005037.3	33.3641	-3.76863	0.245992	-15.3201	5.613e-53	1.31817e-52
AC005042.2	71.1853	6.7959	0.719301	9.44792	3.4563e-21	5.04058e-21
AC005071.1	93.3829	6.37273	0.592833	10.7496	5.95025e-27	9.72644e-27
AC005071.3	51.8092	5.15246	0.538982	9.5596	1.1821e-21	1.73802e-21
AC005076.5	66.1782	-2.56755	0.183033	-14.0279	1.05293e-44	2.21053e-44
AC005154.6	5052.8	7.05335	0.166562	42.3468	0	0
AC005154.7	118.613	5.47158	0.389233	14.0574	6.94314e-45	1.46197e-44
AC005224.2	54.6283	5.82767	0.624042	9.3386	9.76201e-21	1.40928e-20
AC005281.1	28.5047	4.25251	0.974752	4.36266	1.28491e-05	1.44698e-05
AC005329.7	85.9527	8.14027	0.800602	10.1677	2.76409e-24	4.29579e-24
AC005336.4	96.3287	7.94453	0.827324	9.60269	7.78835e-22	1.1496e-21
AC005387.2	43.2636	-10.6306	0.551037	-19.292	6.27036e-83	2.26527e-82
AC005477.1	323.201	10.4124	0.956253	10.8887	1.30428e-27	2.15804e-27
AC005519.4	80.2566	2.05473	0.249336	8.2408	1.71057e-16	2.27427e-16
AC005532.5	46.3966	3.8364	0.555211	6.9098	4.85338e-12	6.00066e-12
AC005534.8	30.3546	7.00135	0.785118	8.91757	4.76641e-19	6.64527e-19
AC005562.1	123.865	3.60165	0.241972	14.8846	4.1514e-50	9.33888e-50
AC005592.2	102.201	8.75067	0.7996	10.9438	7.11411e-28	1.18327e-27
AC005618.6	526.715	11.117	0.849761	13.0825	4.14535e-39	8.08139e-39
AC005682.5	109.603	6.27807	0.672204	9.33953	9.67593e-21	1.39693e-20
AC005682.6	35.4298	6.49808	0.839536	7.74009	9.93465e-15	1.28309e-14
AC005740.6	38.0562	5.89841	0.744868	7.91873	2.39957e-15	3.13204e-15
AC005752.10	36.0258	7.24636	0.836629	8.66137	4.66119e-18	6.37486e-18
AC005754.8	99.3992	6.93012	0.833791	8.31158	9.44337e-17	1.26281e-16
AC005785.5	45.2722	5.32426	0.590365	9.01859	1.90521e-19	2.67766e-19
AC005838.2	41.8497	-8.06922	0.552712	-14.5993	2.83656e-48	6.22707e-48
AC005932.1	25.8872	4.1736	0.576917	7.23431	4.67898e-13	5.8734e-13
AC006019.1	46.9488	1.7805	0.50396	3.53303	0.000410826	0.000450941
AC006026.9	79.2484	-9.36255	0.244003	-38.3706	0	0
AC006042.8	215.323	5.77276	0.446242	12.9364	2.8052e-38	5.4082e-38
AC006116.17	27.4769	6.49383	0.759238	8.55309	1.19837e-17	1.62709e-17
AC006116.19	91.1739	-2.99464	0.241333	-12.4087	2.34299e-35	4.34229e-35
AC006116.22	33.6257	7.14748	0.765589	9.33592	1.00117e-20	1.44469e-20
AC006129.2	43.6981	7.16405	0.83076	8.62349	6.49465e-18	8.86119e-18
AC006272.1	44.4767	6.46236	0.810798	7.97038	1.58192e-15	2.07138e-15
AC006372.6	256.089	-9.99872	0.277736	-36.0009	8.1073e-284	1.04339e-282
AC006538.1	47.2477	7.6382	0.751471	10.1643	2.86081e-24	4.44374e-24
AC006547.14	66.2959	6.40853	0.790521	8.10671	5.20068e-16	6.8604e-16
AC006548.28	5.82582	4.25176	0.852073	4.98991	6.04086e-07	6.935e-07
AC006947.1	28.2931	6.53553	0.745717	8.7641	1.88281e-18	2.59458e-18
AC006978.6	518.371	3.33166	0.217674	15.3058	6.99804e-53	1.63934e-52
AC007016.3	34.5408	-1.9578	0.293065	-6.68043	2.38245e-11	2.91601e-11
AC007036.4	52.5244	-1.10253	0.268416	-4.10753	3.99908e-05	4.46734e-05
AC007038.7	272.74	9.44594	0.735295	12.8465	9.00197e-38	1.72488e-37
AC007128.1	29.6305	-2.81265	0.443091	-6.34779	2.18425e-10	2.63564e-10
AC007131.1	75.4301	-9.71699	0.365206	-26.6069	5.65038e-156	3.49237e-155
AC007191.4	82.6807	8.44501	0.74944	11.2684	1.87904e-29	3.20483e-29
AC007193.8	32.1364	-6.20579	0.425833	-14.5733	4.1525e-48	9.09469e-48
AC007246.3	204.133	4.54525	0.258144	17.6074	2.16007e-69	6.55375e-69
AC007255.8	42.3546	1.84842	0.362344	5.10129	3.37351e-07	3.88949e-07
AC007256.5	131.108	9.11001	0.740489	12.3027	8.75987e-35	1.61144e-34
AC007277.3	41.6707	3.6976	0.573268	6.45003	1.11825e-10	1.35487e-10
AC007292.3	42.8123	7.4943	0.751118	9.97753	1.91166e-23	2.92347e-23
AC007292.6	25.5153	6.74929	0.779953	8.65346	4.99611e-18	6.82936e-18
AC007383.3	90.5059	6.83091	0.659861	10.352	4.09685e-25	6.4723e-25
AC007389.1	71.417	-11.2371	0.336919	-33.3524	6.72996e-244	6.87454e-243
AC007405.4	57.4061	7.91888	0.797139	9.93413	2.95761e-23	4.50939e-23
AC007405.6	73.0371	8.26715	0.774464	10.6747	1.33724e-26	2.16837e-26
AC007566.10	306.308	1.49801	0.205032	7.30623	2.74752e-13	3.46228e-13
AC007620.3	47.8097	7.65498	0.747538	10.2403	1.30887e-24	2.04773e-24
AC007682.1	70.2816	6.48025	1.02174	6.34238	2.2625e-10	2.72955e-10
AC007743.1	33.8162	7.15521	0.791391	9.0413	1.54817e-19	2.18005e-19
AC007773.2	34.0118	7.16248	0.774712	9.24534	2.34498e-20	3.36278e-20
AC007787.3	49.4755	7.34225	0.798672	9.19308	3.8175e-20	5.45094e-20
AC007796.1	26.967	3.78087	0.504404	7.49571	6.59398e-14	8.39713e-14
AC007966.1	42.8636	6.41042	0.78102	8.20775	2.2537e-16	2.99003e-16
AC007967.4	35.4689	-10.4031	0.870482	-11.9509	6.42062e-33	1.15163e-32
AC007998.1	100.75	-12.088	0.968066	-12.4867	8.82225e-36	1.64478e-35
AC008060.7	86.0393	8.50301	0.915047	9.29243	1.50799e-20	2.16841e-20
AC008074.3	36.8029	-3.2112	0.244959	-13.1091	2.91871e-39	5.70104e-39
AC008079.10	34.455	1.85337	0.463542	3.99827	6.38065e-05	7.10242e-05
AC008171.1	88.499	-11.7828	0.315485	-37.3484	2.69665e-305	3.98332e-304
AC008269.2	40.3218	6.68614	0.781557	8.5549	1.1797e-17	1.60183e-17
AC008592.8	36.1426	-5.57323	0.382621	-14.5659	4.62812e-48	1.01288e-47
AC008746.12	86.8791	0.754868	0.205127	3.68	0.000233235	0.000257136
AC008982.2	68.8076	5.57923	0.501997	11.1141	1.07146e-28	1.80763e-28
AC009005.2	43.8277	7.16729	0.788322	9.09183	9.73861e-20	1.37732e-19
AC009060.1	65.1792	-8.97857	0.276272	-32.499	1.10039e-231	1.04866e-230
AC009120.3	133.483	8.77483	0.741421	11.8351	2.56898e-32	4.56393e-32
AC009120.6	537.391	11.1458	0.741626	15.0288	4.75368e-51	1.08318e-50
AC009133.12	77.9493	8.36096	0.809019	10.3347	4.91032e-25	7.74813e-25
AC009166.7	324.585	10.4184	0.772244	13.4911	1.76548e-41	3.54403e-41
AC009229.6	38.255	-8.14187	0.320622	-25.394	2.93901e-142	1.65756e-141
AC009234.1	38.0913	3.93631	0.693286	5.67776	1.36472e-08	1.60613e-08
AC009237.8	404.405	10.0143	0.796436	12.5739	2.93689e-36	5.51648e-36
AC009303.2	23.8278	6.64997	0.740428	8.98125	2.67717e-19	3.75118e-19
AC009303.3	25.0326	6.72186	0.73774	9.11143	8.13068e-20	1.15233e-19
AC009403.2	187.877	9.62997	0.740219	13.0096	1.07886e-38	2.0913e-38
AC009404.2	201.836	3.95579	0.236716	16.7111	1.08757e-62	2.98337e-62
AC009487.6	30.1917	6.62867	0.761902	8.70016	3.31408e-18	4.54359e-18
AC009495.3	24.3459	6.67977	0.775859	8.60951	7.33714e-18	9.9982e-18
AC009501.4	97.7347	4.41206	0.687657	6.41608	1.3983e-10	1.69232e-10
AC009506.1	103.026	6.99895	0.678994	10.3078	6.49574e-25	1.02259e-24
AC009518.4	50.6643	7.7395	1.02329	7.56337	3.92763e-14	5.02233e-14
AC009948.5	337.676	10.4756	0.738646	14.1822	1.18035e-45	2.50888e-45
AC009950.2	46.1318	7.60324	0.751082	10.123	4.36639e-24	6.75604e-24
AC009961.3	102.315	8.75248	0.74146	11.8044	3.70495e-32	6.56828e-32
AC010127.3	47.8161	6.56419	0.921518	7.12324	1.05417e-12	1.31592e-12
AC010146.2	36.557	-10.2082	0.356573	-28.6287	2.94916e-180	2.11287e-179
AC010150.1	27.6465	2.94966	0.3376	8.73715	2.39059e-18	3.28675e-18
AC010226.4	38.4801	7.34315	0.768009	9.56128	1.16304e-21	1.71057e-21
AC010642.1	162.572	4.68943	0.337793	13.8825	8.0836e-44	1.67514e-43
AC010729.1	29.3388	3.87527	0.538656	7.19434	6.27623e-13	7.86338e-13
AC010740.1	106.781	-11.9952	0.349759	-34.2956	9.11663e-258	1.01055e-256
AC010874.1	60.1117	-11.3429	1.10271	-10.2864	8.11388e-25	1.27389e-24
AC010878.3	35.4152	-7.61761	0.835484	-9.11761	7.68019e-20	1.08883e-19
AC010900.2	52.5152	7.066	0.738331	9.57023	1.06664e-21	1.57019e-21
AC011242.6	41.0894	3.03201	0.462645	6.55365	5.61473e-11	6.8359e-11
AC011747.4	70.3905	8.21322	0.842861	9.74445	1.94836e-22	2.91384e-22
AC012066.1	276.182	10.185	0.738566	13.7903	2.91539e-43	5.99659e-43
AC012074.2	25.3906	6.74107	0.779023	8.65324	5.00556e-18	6.84156e-18
AC012146.7	72.9401	6.5188	0.669856	9.73165	2.20986e-22	3.30173e-22
AC012358.7	48.3671	4.78614	0.503089	9.51349	1.84367e-21	2.70015e-21
AC012358.8	39.2808	7.01022	0.82541	8.49302	2.01344e-17	2.7221e-17
AC012370.2	95.4676	2.37933	0.279969	8.49853	1.92012e-17	2.59713e-17
AC012442.6	58.7933	-2.37541	0.221658	-10.7165	8.51454e-27	1.38673e-26
AC012531.25	25.135	6.00324	0.966935	6.20852	5.34856e-10	6.42204e-10
AC013269.5	48.9528	-11.0467	1.06626	-10.3602	3.76224e-25	5.9494e-25
AC013463.2	24.5538	6.6921	0.781661	8.56138	1.11528e-17	1.51514e-17
AC015849.13	36.7988	3.94396	0.418012	9.43504	3.90841e-21	5.69423e-21
AC015849.15	24.1949	5.19897	0.881882	5.89531	3.73989e-09	4.43581e-09
AC015936.3	700.201	4.11732	0.513047	8.02523	1.01339e-15	1.33126e-15
AC016549.1	263.571	9.75678	0.751679	12.98	1.58923e-38	3.0727e-38
AC016582.2	41.4398	-10.0332	0.801095	-12.5243	5.49584e-36	1.02841e-35
AC016735.2	29.5524	6.96168	0.898987	7.74392	9.6401e-15	1.24523e-14
AC016747.3	299.403	10.3023	0.750334	13.7302	6.69076e-43	1.36882e-42
AC016757.3	27.8887	6.51514	0.859299	7.58192	3.40487e-14	4.3581e-14
AC016907.3	42.0095	0.654038	0.310212	2.10836	0.0349999	0.0368987
AC017002.2	181.726	9.22084	0.801834	11.4997	1.32384e-30	2.29497e-30
AC017035.2	64.0491	-3.5948	0.232636	-15.4525	7.2603e-54	1.72678e-53
AC017104.6	30.8319	6.29821	0.769678	8.18292	2.77057e-16	3.67078e-16
AC018442.1	63.9594	8.07456	0.729656	11.0663	1.82878e-28	3.07424e-28
AC018463.1	28.2047	6.89243	0.74242	9.28374	1.63639e-20	2.35202e-20
AC018647.3	79.2143	5.51998	0.541684	10.1904	2.18878e-24	3.40772e-24
AC018738.2	43.595	2.49542	0.32678	7.63637	2.23435e-14	2.86938e-14
AC018755.16	34.8504	1.00614	0.261745	3.84396	0.000121066	0.00013417
AC018766.4	109.703	8.85329	0.737254	12.0085	3.20735e-33	5.77885e-33
AC018816.3	24.6449	6.70076	0.761644	8.79776	1.39569e-18	1.92776e-18
AC019181.3	331.898	-6.36741	0.225085	-28.2889	4.72849e-176	3.30743e-175
AC020931.1	57.4162	-10.566	0.319558	-33.0645	9.62632e-240	9.6201e-239
AC020951.1	360.36	10.2085	0.756527	13.4939	1.69816e-41	3.40994e-41
AC021188.4	62.5635	7.68228	0.864128	8.89021	6.09923e-19	8.48368e-19
AC022007.5	88.0495	8.53655	0.761545	11.2095	3.66202e-29	6.21839e-29
AC022182.1	27.24	6.84273	0.812415	8.4227	3.67893e-17	4.95366e-17
AC022819.3	31.4988	6.32519	0.754165	8.38701	4.98661e-17	6.699e-17
AC023385.1	126.45	-6.66659	0.197736	-33.7146	3.52847e-249	3.71691e-248
AC023481.1	52.4597	7.78951	0.79349	9.81677	9.53529e-23	1.43781e-22
AC024560.3	912.318	11.9095	0.732064	16.2684	1.6541e-59	4.30393e-59
AC024704.2	400.902	-7.9949	0.289091	-27.6553	2.40716e-168	1.6011e-167
AC025171.1	234.29	3.90129	0.254632	15.3213	5.51158e-53	1.29447e-52
AC025279.1	70.0125	-7.33193	0.252403	-29.0485	1.60816e-185	1.18707e-184
AC025335.1	156.961	9.37029	0.739939	12.6636	9.40825e-37	1.7785e-36
AC026271.5	35.9086	7.2429	0.744901	9.7233	2.39881e-22	3.57937e-22
AC026700.1	74.6715	-11.6558	0.91768	-12.7014	5.80714e-37	1.10084e-36
AC026904.1	41.4485	6.72675	0.88115	7.63405	2.27491e-14	2.92119e-14
AC027612.4	367.687	10.5984	1.03766	10.2138	1.7205e-24	2.68549e-24
AC027612.6	135.425	9.15738	0.868007	10.5499	5.08584e-26	8.16573e-26
AC034220.3	316.205	8.17425	0.594141	13.7581	4.55257e-43	9.3363e-43
AC044907.1	42.3599	7.48063	0.755809	9.89751	4.26777e-23	6.48552e-23
AC058791.1	1246.26	10.1252	0.58463	17.319	3.37931e-67	9.93429e-67
AC062017.1	27.8224	6.87638	0.775823	8.86334	7.76534e-19	1.07766e-18
AC062029.1	61.724	1.03731	0.24701	4.19947	2.67544e-05	2.99648e-05
AC064850.4	60.8293	7.64164	0.741072	10.3116	6.24449e-25	9.83682e-25
AC064875.2	838.343	10.7113	0.887719	12.0661	1.59472e-33	2.88436e-33
AC067940.1	27.8973	5.78894	0.767802	7.53962	4.7135e-14	6.017e-14
AC067945.3	42.6639	6.04108	0.770061	7.84493	4.33184e-15	5.62983e-15
AC068039.4	34.3394	7.17715	0.769331	9.32909	1.06782e-20	1.53986e-20
AC068057.1	35.7819	7.2374	0.829065	8.72958	2.55614e-18	3.51105e-18
AC068134.10	37.4313	7.30069	0.752865	9.69722	3.09835e-22	4.61113e-22
AC068282.3	66.4334	8.13092	0.778778	10.4406	1.61762e-25	2.57271e-25
AC068535.2	23.9008	5.56421	0.893463	6.22769	4.73372e-10	5.68847e-10
AC068580.5	56.0906	7.88592	0.796621	9.89921	4.19584e-23	6.37732e-23
AC069157.1	72.1268	-10.8949	0.331694	-32.8462	1.28993e-236	1.2627e-235
AC069213.1	40.107	7.40136	0.943724	7.84273	4.40873e-15	5.72919e-15
AC069257.6	29.2488	-2.37561	0.244936	-9.69887	3.04847e-22	4.53792e-22
AC069285.1	31.8886	-10.1897	0.834075	-12.2168	2.52816e-34	4.62196e-34
AC072062.1	85.9259	3.04779	0.361922	8.42112	3.72902e-17	5.02033e-17
AC072062.3	42.7775	6.77177	0.849818	7.9685	1.60614e-15	2.10289e-15
AC073043.1	28.9636	6.93404	0.796503	8.7056	3.15886e-18	4.33147e-18
AC073046.25	56.0924	7.88456	0.754247	10.4535	1.41143e-25	2.24641e-25
AC073052.1	114.739	8.55709	0.731125	11.704	1.21595e-31	2.14024e-31
AC073109.2	151.625	9.32047	0.799792	11.6536	2.19921e-31	3.85544e-31
AC073283.4	100.524	1.68332	0.40224	4.18487	2.85335e-05	3.19384e-05
AC073283.7	30.4637	6.6415	0.808871	8.21082	2.19676e-16	2.91508e-16
AC073326.3	31.4126	7.05058	0.774584	9.10241	8.83493e-20	1.25106e-19
AC073342.12	39.7555	1.04093	0.304273	3.42103	0.000623843	0.000682649
AC073343.13	81.3453	7.70028	0.758705	10.1492	3.33958e-24	5.18008e-24
AC073410.1	59.8725	7.97853	0.735379	10.8495	2.00419e-27	3.30281e-27
AC074117.10	140.342	9.20923	0.739229	12.4579	1.26701e-35	2.35698e-35
AC074212.5	31.153	7.03619	0.775448	9.07371	1.15027e-19	1.62437e-19
AC074286.1	441.105	7.50085	0.414766	18.0845	4.21911e-73	1.34693e-72
AC074289.1	127.843	9.07433	0.757153	11.9848	4.26889e-33	7.67782e-33
AC074363.1	74.5492	8.29599	0.821143	10.103	5.35855e-24	8.27464e-24
AC074367.1	46.6858	4.73028	0.466243	10.1455	3.46962e-24	5.37893e-24
AC074389.6	61.2467	-11.1327	0.550677	-20.2164	7.02344e-91	2.735e-90
AC078842.3	34.1086	7.16878	0.817216	8.7722	1.75211e-18	2.416e-18
AC078852.1	35.7453	-2.88468	0.233209	-12.3695	3.8224e-35	7.06371e-35
AC078950.1	39.0871	-7.18024	0.327431	-21.929	1.37449e-106	6.06368e-106
AC079135.1	40.6329	2.42518	0.552759	4.3874	1.14711e-05	1.29308e-05
AC079630.4	37.2655	6.20941	0.773649	8.02613	1.00595e-15	1.32168e-15
AC079781.8	35.2342	4.36299	0.528667	8.25281	1.54711e-16	2.05851e-16
AC079807.2	32.453	6.37006	0.745364	8.54624	1.2716e-17	1.72572e-17
AC079922.3	65.8839	8.11942	0.744889	10.9002	1.15044e-27	1.90566e-27
AC083843.1	340.135	8.72643	0.683346	12.7702	2.40676e-37	4.58524e-37
AC083843.4	43.6985	7.52583	0.773789	9.72595	2.33714e-22	3.48813e-22
AC083899.3	51.8083	7.77043	0.750288	10.3566	3.90626e-25	6.1738e-25
AC084082.3	100.43	8.00436	0.868265	9.2188	3.00436e-20	4.29733e-20
AC084219.4	170.41	8.40486	0.771704	10.8913	1.26802e-27	2.09871e-27
AC084882.1	120.841	-8.2617	0.487212	-16.9571	1.70537e-64	4.80438e-64
AC087294.2	53.5805	7.8186	0.754547	10.362	3.69213e-25	5.84028e-25
AC087380.14	55.3542	7.86654	0.79007	9.95677	2.35594e-23	3.59747e-23
AC087430.1	59.998	-7.11574	0.635142	-11.2034	3.92489e-29	6.66089e-29
AC090587.2	102.457	8.03222	0.756917	10.6118	2.62758e-26	4.24185e-26
AC090587.4	59.8363	1.97698	0.204553	9.66491	4.25002e-22	6.30726e-22
AC090945.1	112.5	3.25282	0.330421	9.84445	7.24343e-23	1.09518e-22
AC091133.1	68.2559	8.16707	0.732977	11.1423	7.80589e-29	1.31919e-28
AC091633.3	138.783	-6.51385	0.295054	-22.0768	5.28167e-108	2.35056e-107
AC091729.9	196.347	8.97245	0.752754	11.9195	9.36837e-33	1.67623e-32
AC092066.1	146.005	8.90482	0.753051	11.825	2.89975e-32	5.14634e-32
AC092159.3	150.496	-11.3072	0.614942	-18.3874	1.65679e-75	5.45206e-75
AC092168.2	142.596	6.14408	0.57215	10.7386	6.70699e-27	1.09451e-26
AC092484.1	47.3033	-3.57471	0.848451	-4.21322	2.51756e-05	2.82122e-05
AC092506.1	34.3385	-10.2968	0.881469	-11.6814	1.58672e-31	2.78819e-31
AC092566.1	61.7064	-11.0829	0.324666	-34.1362	2.14596e-255	2.35001e-254
AC092574.2	41.729	7.45734	0.741248	10.0605	8.25613e-24	1.27021e-23
AC092620.2	25.9004	2.64025	0.360038	7.33325	2.24635e-13	2.83495e-13
AC092638.1	185.163	-12.9067	0.402274	-32.0844	7.26976e-226	6.67169e-225
AC092638.2	31.6116	-10.4157	1.16104	-8.97106	2.93683e-19	4.11194e-19
AC092675.3	162.616	9.42137	0.791434	11.9042	1.1258e-32	2.01187e-32
AC092835.2	382.306	5.51064	0.267358	20.6115	2.16628e-94	8.68527e-94
AC092839.1	134.208	7.70844	0.715591	10.7721	4.66036e-27	7.63124e-27
AC093106.5	160.172	-11.3441	0.359274	-31.575	8.14061e-219	7.17056e-218
AC093323.3	381.344	10.6515	0.737254	14.4475	2.59808e-47	5.63438e-47
AC093375.1	14.4791	5.93318	1.25981	4.70958	2.48231e-06	2.82714e-06
AC093388.3	39.23	5.92944	0.728226	8.14231	3.87813e-16	5.12632e-16
AC093495.4	43.5975	6.43807	0.769639	8.36505	6.00916e-17	8.06116e-17
AC093609.1	27.2032	2.44453	0.552011	4.4284	9.49336e-06	1.0723e-05
AC093616.4	121.98	4.56091	0.454279	10.0399	1.01781e-23	1.56343e-23
AC093627.10	67.6747	8.15674	0.807512	10.1011	5.46366e-24	8.43349e-24
AC093627.9	49.266	7.70079	0.761262	10.1158	4.7003e-24	7.26671e-24
AC093642.1	129.04	8.72678	0.901514	9.68015	3.66191e-22	5.44062e-22
AC093642.3	140.155	8.48488	0.864871	9.81057	1.0139e-22	1.52753e-22
AC093642.5	114.54	8.91467	0.736597	12.1025	1.02441e-33	1.85745e-33
AC093673.5	259.984	5.9548	0.382184	15.581	9.80326e-55	2.36128e-54
AC093786.1	38.4801	-10.6994	1.17908	-9.07429	1.14419e-19	1.61605e-19
AC093818.1	43.1661	7.50775	0.770149	9.74844	1.87316e-22	2.80361e-22
AC093838.4	712.675	9.80576	0.663854	14.771	2.25461e-49	5.02674e-49
AC093859.1	41.8869	6.39269	0.783175	8.16252	3.28098e-16	4.34113e-16
AC096559.1	56.9685	7.18624	0.957346	7.50641	6.07705e-14	7.74522e-14
AC096582.7	23.6203	6.63757	0.762885	8.70062	3.30075e-18	4.52556e-18
AC096772.6	111.028	8.87043	0.736451	12.0448	2.06519e-33	3.72888e-33
AC097662.2	96.5966	7.23479	0.732405	9.87813	5.17889e-23	7.85331e-23
AC097713.3	26.81	6.45893	1.14809	5.6258	1.84648e-08	2.1683e-08
AC097721.1	36.8915	1.80721	0.268668	6.72655	1.73734e-11	2.13129e-11
AC097721.2	73.3977	4.92778	0.416427	11.8335	2.62016e-32	4.65455e-32
AC097724.3	30.7858	5.57731	0.756887	7.36874	1.72247e-13	2.17798e-13
AC098614.2	46.1925	4.3608	0.516236	8.44729	2.9813e-17	4.01986e-17
AC098820.3	27.5268	5.76902	0.796615	7.24192	4.42369e-13	5.55507e-13
AC099850.1	30.0126	4.73656	0.588227	8.05227	8.12696e-16	1.06943e-15
AC104058.1	60.336	7.62875	0.743236	10.2642	1.02115e-24	1.60025e-24
AC104655.3	28.2814	4.53851	0.747621	6.07061	1.27428e-09	1.52183e-09
AC104692.1	24.2745	-0.797367	0.216238	-3.68746	0.000226508	0.000249804
AC104809.3	17.7306	5.12662	1.08916	4.70695	2.51445e-06	2.86325e-06
AC105760.2	58.6722	7.22789	0.747261	9.6725	3.94611e-22	5.86055e-22
AC105760.3	40.3852	4.51512	0.506106	8.92128	4.60937e-19	6.4294e-19
AC107072.2	33.6908	7.15078	0.845659	8.45587	2.77023e-17	3.73699e-17
AC107079.1	31.4143	-10.3471	0.886101	-11.6771	1.66902e-31	2.93183e-31
AC108051.1	42.2866	-10.6565	0.429799	-24.7942	1.03636e-135	5.59411e-135
AC108142.1	50.2601	7.72745	1.08386	7.12957	1.00682e-12	1.2573e-12
AC108463.2	85.9684	7.41574	0.788379	9.40632	5.13809e-21	7.46098e-21
AC108488.4	65.4712	1.64624	0.224903	7.31976	2.48413e-13	3.13367e-13
AC108938.5	115.616	3.99405	0.588243	6.7898	1.12291e-11	1.3812e-11
AC109826.1	53.686	7.82224	0.797236	9.81169	1.00274e-22	1.51089e-22
AC113189.5	101.059	8.73548	0.746218	11.7063	1.18277e-31	2.08239e-31
AC114271.2	87.7605	6.524	0.608284	10.7252	7.74824e-27	1.26302e-26
AC114730.3	48.0846	7.66341	1.01813	7.52697	5.19323e-14	6.62586e-14
AC114803.3	33.8786	7.15819	0.916475	7.81056	5.69328e-15	7.38206e-15
AC114877.3	38.3214	7.33675	0.915052	8.01785	1.07612e-15	1.41296e-15
AC114973.1	47.9343	-11.0164	1.16007	-9.49631	2.17465e-21	3.18203e-21
AC116366.6	30.0269	6.26119	0.795086	7.87486	3.41136e-15	4.43968e-15
AC117947.1	49.6902	7.71001	0.790506	9.75325	1.78647e-22	2.67538e-22
AC118653.2	33.4122	-9.78022	0.349598	-27.9756	3.21588e-172	2.1951e-171
AC124074.1	32.0416	-4.20956	0.278926	-15.092	1.82727e-51	4.18943e-51
AC125232.1	94.7565	8.64222	0.73834	11.7049	1.20236e-31	2.11675e-31
AC125238.3	62.6927	-11.3443	0.755796	-15.0097	6.3389e-51	1.4414e-50
AC127904.2	109.676	1.20862	0.18821	6.42166	1.34799e-10	1.6318e-10
AC129492.1	42.3823	-7.70561	0.338255	-22.7805	7.15982e-115	3.32956e-114
AC129492.6	47.5342	-7.32094	0.539831	-13.5615	6.77023e-42	1.36542e-41
AC131056.3	32.4868	6.73688	0.938966	7.17479	7.24198e-13	9.06299e-13
AC131213.1	53.5529	-11.1762	1.12752	-9.91219	3.68491e-23	5.60659e-23
AC132812.1	36.9801	2.66055	0.288377	9.22592	2.81138e-20	4.02437e-20
AC133528.2	105.35	8.79548	0.733294	11.9945	3.7978e-33	6.83801e-33
AC136289.1	32.7987	7.10985	0.7752	9.17163	4.65935e-20	6.64073e-20
AC138969.4	83.3314	8.45714	0.752435	11.2397	2.6028e-29	4.42947e-29
AC139100.3	34.592	7.18851	0.835524	8.60359	7.72592e-18	1.05236e-17
AC139100.4	71.7062	-2.09993	0.191445	-10.9688	5.39619e-28	9.00209e-28
AC139712.4	258.606	-12.7399	0.312716	-40.7395	0	0
AC139887.4	243.277	-5.071	0.17937	-28.2711	7.82622e-176	5.46112e-175
AC140076.1	2032.33	-14.6522	0.320505	-45.7159	0	0
AC140132.1	562.071	-14.5679	1.4139	-10.3034	6.80206e-25	1.06978e-24
AC140479.1	190.345	-12.9466	0.325081	-39.8257	0	0
AC140481.4	56.208	-10.8901	0.446487	-24.3906	2.1539e-131	1.12769e-130
AC140481.8	285.809	-11.6789	0.614029	-19.0201	1.16161e-80	4.08647e-80
AC140542.2	342.562	-10.7114	0.675098	-15.8665	1.0811e-56	2.68721e-56
AC140725.4	401.44	-11.0136	0.20147	-54.6661	0	0
AC140725.7	78.3958	-11.4307	0.321606	-35.5426	1.08291e-276	1.33113e-275
AC140725.8	508.58	-14.4237	1.40511	-10.2652	1.01133e-24	1.58505e-24
AC140912.1	1105.84	-9.2249	0.386514	-23.8669	6.7633e-126	3.41976e-125
AC141002.1	41.6112	-10.8122	1.11491	-9.6979	3.07771e-22	4.58067e-22
AC141586.5	131.644	1.46374	0.218174	6.70903	1.95924e-11	2.4007e-11
AC141928.1	765.921	-8.08152	0.5705	-14.1657	1.49428e-45	3.17026e-45
AC141930.2	42.6997	-7.04857	0.475211	-14.8325	9.0266e-50	2.02195e-49
AC142119.1	1198.89	-15.3663	0.352373	-43.6082	0	0
AC142293.3	348.269	-13.0522	0.328423	-39.742	0	0
AC142472.6	357.779	-4.37777	0.216432	-20.227	5.66144e-91	2.20691e-90
AC142528.1	334.903	-6.8063	0.238237	-28.5695	1.60906e-179	1.14996e-178
AC143336.1	119.442	-11.4474	0.359376	-31.8537	1.1702e-222	1.0537e-221
AC144449.1	741.503	-6.39141	0.165438	-38.6332	0	0
AC144450.1	323.345	-8.59809	0.419505	-20.4958	2.34831e-93	9.33818e-93
AC144450.2	100.623	-6.1811	0.375183	-16.4749	5.55825e-61	1.48053e-60
AC144525.1	92.1136	-11.7226	0.306973	-38.1875	0	0
AC144530.1	58.7233	-6.75748	0.272333	-24.8133	6.43922e-136	3.48296e-135
AC144652.1	54.3776	7.84318	0.748462	10.4791	1.07812e-25	1.72039e-25
AC144831.1	31.2782	3.36275	0.483421	6.95615	3.49697e-12	4.33196e-12
AC144831.3	113.383	-4.66604	0.286665	-16.277	1.43851e-59	3.74669e-59
AC144833.1	432.938	-7.71133	0.682308	-11.3018	1.28506e-29	2.1976e-29
AC144835.1	160.203	-5.586	0.528218	-10.5752	3.88425e-26	6.24868e-26
AC144836.1	914.666	-13.5478	0.290057	-46.7073	0	0
AC144838.2	68.5761	-11.533	1.0862	-10.6177	2.46434e-26	3.9815e-26
AC145110.1	58.5904	-6.45246	0.436974	-14.7662	2.41874e-49	5.39041e-49
AC145124.1	946.063	-11.3007	0.363434	-31.0942	2.88659e-212	2.46259e-211
AC145124.2	57.4948	7.92111	0.818032	9.68313	3.5567e-22	5.2864e-22
AC145141.2	33.9908	-10.5205	1.16099	-9.06165	1.28494e-19	1.8124e-19
AC145343.1	378.024	-6.1236	0.255415	-23.9751	5.06122e-127	2.57797e-126
AC145343.2	2005.71	-10.7276	0.200664	-53.4602	0	0
AC145676.2	41.2914	-3.04302	0.465011	-6.54397	5.99084e-11	7.2901e-11
AC147651.1	403.203	-8.89407	0.428586	-20.7521	1.17326e-95	4.76427e-95
AC147651.4	209.643	-4.95873	0.299131	-16.5772	1.01939e-61	2.74507e-61
AC147651.5	58.9171	-10.3076	0.332406	-31.009	4.0792e-211	3.46541e-210
AC156455.1	630.465	-6.40536	0.315808	-20.2824	1.8387e-91	7.19418e-91
AC159540.1	230.773	-4.24398	0.331799	-12.7908	1.8457e-37	3.52093e-37
AC159540.14	241.018	-5.98062	0.798762	-7.48737	7.02666e-14	8.94379e-14
AC159540.2	1008.62	-15.0583	0.30946	-48.6598	0	0
AC190387.1	233.131	-13.0032	0.300247	-43.3084	0	0
AC195454.1	424.764	-10.5508	0.271428	-38.8715	0	0
AC211469.1	231.374	-12.9928	0.357821	-36.3109	1.08907e-288	1.44475e-287
AC215219.1	182.92	-12.9484	0.869933	-14.8844	4.16257e-50	9.3632e-50
AC226119.4	73.2887	-9.85105	0.457838	-21.5165	1.09193e-102	4.68355e-102
AC226150.3	731.913	-14.9489	1.44273	-10.3615	3.71093e-25	5.86967e-25
AC231656.1	68.2412	-11.526	1.02518	-11.2428	2.51149e-29	4.2752e-29
AC231657.1	229.43	-6.10698	0.226407	-26.9735	3.02726e-160	1.92167e-159
AC231759.1	404.497	-12.7418	0.363951	-35.0097	1.60141e-268	1.87973e-267
AC231759.2	2135.37	-15.1989	0.347281	-43.7654	0	0
AC233280.3	848.145	-15.1615	1.42998	-10.6026	2.89857e-26	4.67587e-26
AC233287.1	125.627	-12.4064	1.02323	-12.1247	7.8171e-34	1.42062e-33
AC233299.1	2086.21	-16.4012	0.325405	-50.4024	0	0
AC234917.1	549.567	-14.1231	0.430448	-32.8102	4.21607e-236	4.10719e-235
AC235953.1	243.574	-13.3615	1.40009	-9.54336	1.38276e-21	2.02986e-21
AC236972.1	253.258	-13.0051	0.407986	-31.8763	5.68959e-223	5.1302e-222
AC239798.1	126.478	-12.2389	1.01497	-12.0585	1.75024e-33	3.16456e-33
AC239800.1	102.563	-12.1134	0.374696	-32.3286	2.77012e-229	2.60217e-228
AC239802.1	10042.6	-18.7272	1.41356	-13.2482	4.61916e-40	9.11251e-40
AC243654.1	5164.06	-17.7088	0.367976	-48.1249	0	0
AC243980.1	36.5118	-10.6236	1.20831	-8.79209	1.46801e-18	2.0268e-18
AC244250.4	41.4545	-10.6875	0.341033	-31.3386	1.39256e-215	1.212e-214
AC244258.1	289.37	-13.5513	0.370695	-36.5565	1.40772e-292	1.91679e-291
AC245036.3	1142.44	-15.0021	0.307882	-48.7269	0	0
AC245036.5	505.214	-14.4141	1.39925	-10.3013	6.95346e-25	1.09333e-24
AC245100.1	1159.23	-6.95089	0.242124	-28.7079	3.03926e-181	2.18875e-180
AC245470.1	476.824	-14.3306	1.43388	-9.99429	1.61435e-23	2.47182e-23
AC246787.1	1307.36	-15.0201	0.784819	-19.1383	1.21275e-81	4.31954e-81
AC246787.3	809.957	-14.6238	0.337575	-43.3202	0	0
AC246787.4	1995.58	-15.1586	0.697578	-21.7304	1.05976e-104	4.62555e-104
AC246787.5	795.723	-15.0106	0.347727	-43.1679	0	0
AC253572.1	687.391	-1.99049	0.288438	-6.90094	5.16578e-12	6.3851e-12
AC253576.2	50.8155	7.74305	0.766788	10.098	5.63567e-24	8.6939e-24
ACA64	246.507	-13.3788	1.41901	-9.42831	4.16735e-21	6.06712e-21
ACAA1	1700.36	12.0864	0.732585	16.4983	3.77059e-61	1.00629e-60
ACAA2	1495.84	-0.618467	0.190523	-3.24615	0.00116978	0.00127284
ACACA	5187.58	9.64113	0.277387	34.757	1.08584e-264	1.24618e-263
ACACB	1797.88	12.8883	0.773009	16.6728	2.06556e-62	5.63671e-62
ACAD10	1393.57	3.8862	0.106956	36.3347	4.58087e-289	6.09847e-288
ACAD11	490.42	-1.2857	0.140151	-9.17365	4.57285e-20	6.51851e-20
ACAD8	2104.02	-1.61462	0.099929	-16.1577	1.0026e-58	2.57737e-58
ACAD9	2073.08	0.69219	0.116624	5.93522	2.93446e-09	3.48553e-09
ACADL	427.581	-5.12969	0.539647	-9.50564	1.98827e-21	2.91078e-21
ACADM	1720.22	-1.13624	0.112392	-10.1096	5.00862e-24	7.73883e-24
ACADS	463.572	2.76926	0.189171	14.6389	1.58562e-48	3.49638e-48
ACADVL	7528.63	6.21031	0.24762	25.08	8.22276e-139	4.53062e-138
ACAN	326.539	2.62447	0.491744	5.33708	9.44567e-08	1.09741e-07
ACAP1	200.424	-2.1682	0.381043	-5.69018	1.26905e-08	1.49461e-08
ACAP2	3323.79	1.19011	0.129233	9.20902	3.29102e-20	4.70403e-20
ACAP2-IT1	41.1308	6.34923	0.852572	7.44715	9.538e-14	1.21174e-13
ACAP3	3049.84	12.9293	0.762712	16.9517	1.86829e-64	5.25548e-64
ACAT1	1279	4.29845	0.152833	28.1251	4.83926e-174	3.34135e-173
ACAT2	765.636	8.33224	0.426454	19.5384	5.17679e-85	1.91036e-84
ACBD3	1627.16	8.87034	0.323699	27.403	2.52383e-165	1.64949e-164
ACBD4	378.663	5.94459	0.30129	19.7305	1.18049e-86	4.42333e-86
ACBD5	1610.98	8.06764	0.273901	29.4546	1.10029e-190	8.33954e-190
ACBD7	181.94	8.49477	0.898297	9.45653	3.18339e-21	4.64515e-21
ACCS	1063.87	3.11587	0.258668	12.0458	2.04031e-33	3.68447e-33
ACD	389.079	10.6801	0.736781	14.4956	1.29146e-47	2.81165e-47
ACE	404.112	3.4187	0.349855	9.77175	1.48856e-22	2.23458e-22
ACE2	164.475	-5.65915	0.367991	-15.3785	2.28129e-53	5.38776e-53
ACE3P	849.524	-15.1638	1.39142	-10.8981	1.17696e-27	1.94921e-27
ACEA_U3	865.422	-14.7195	0.320683	-45.9005	0	0
ACER1	349.05	-10.6159	0.180136	-58.933	0	0
ACER2	128.065	8.35449	0.751114	11.1228	9.71817e-29	1.64026e-28
ACER3	2273.26	1.10157	0.227487	4.84234	1.28319e-06	1.46684e-06
ACHE	354.834	10.5471	0.831984	12.677	7.92751e-37	1.5002e-36
ACIN1	5195.22	10.9762	0.386075	28.4302	8.57513e-178	6.05115e-177
ACKR1	156.987	9.37058	0.928286	10.0945	5.843e-24	9.01214e-24
ACKR2	134.456	-3.41926	0.245136	-13.9484	3.21647e-44	6.70186e-44
ACKR3	1192.7	1.34319	0.27367	4.90807	9.19759e-07	1.053e-06
ACLY	7593.81	14.9668	0.738413	20.2688	2.42428e-91	9.47831e-91
ACN9	176.938	5.43342	0.405311	13.4055	5.61066e-41	1.1197e-40
ACO1	3788.95	-2.96778	0.193686	-15.3226	5.3992e-53	1.26853e-52
ACO2	5100.68	-0.93181	0.195437	-4.76783	1.86219e-06	2.12419e-06
ACOT1	78.1621	8.004	0.787884	10.1589	3.02622e-24	4.69901e-24
ACOT11	1342.17	1.3345	0.372395	3.58355	0.000338954	0.000372643
ACOT13	551.968	11.1848	0.744238	15.0285	4.77952e-51	1.08898e-50
ACOT2	393.726	-1.71261	0.169891	-10.0807	6.72733e-24	1.03634e-23
ACOT4	111.045	-4.00407	0.341672	-11.719	1.01836e-31	1.79425e-31
ACOT7	648.588	6.09947	0.285867	21.3367	5.18049e-101	2.19376e-100
ACOT8	678.852	5.72297	0.1947	29.3938	6.58681e-190	4.97521e-189
ACOT9	1261.94	12.3776	0.731132	16.9294	2.73148e-64	7.65904e-64
ACOX1	4470.52	12.7699	0.708194	18.0316	1.09985e-72	3.49424e-72
ACOX2	443.594	0.898298	0.325807	2.75715	0.00583083	0.00625909
ACOX3	1444.1	-1.8194	0.0998417	-18.2228	3.40243e-74	1.10145e-73
ACP1	1806.76	-0.376489	0.1133	-3.32293	0.000890764	0.000971698
ACP5	216.81	2.80722	0.511299	5.49036	4.01125e-08	4.68642e-08
ACP6	1529.28	0.83194	0.195933	4.24605	2.17572e-05	2.44116e-05
ACR	47.4736	-5.65133	0.308022	-18.3471	3.47941e-75	1.14113e-74
ACRBP	176.886	-3.62357	0.262927	-13.7816	3.28786e-43	6.7569e-43
ACRC	211.153	1.59744	0.263165	6.07011	1.27822e-09	1.52647e-09
ACRV1	120.07	-5.98251	0.670584	-8.92133	4.60706e-19	6.42652e-19
ACSBG1	2057.09	6.12475	0.449855	13.6149	3.26382e-42	6.61189e-42
ACSBG2	75.4886	-5.37555	0.471463	-11.4018	4.09366e-30	7.04461e-30
ACSF2	645.432	4.51212	0.229115	19.6937	2.44336e-86	9.12157e-86
ACSF3	1093.24	0.71822	0.153487	4.67935	2.87783e-06	3.27392e-06
ACSL1	3648.58	1.08903	0.392625	2.7737	0.00554219	0.00595192
ACSL3	5611.78	5.29096	0.278734	18.9821	2.39788e-80	8.41192e-80
ACSL4	1866.29	3.04571	0.230116	13.2355	5.47127e-40	1.07879e-39
ACSL5	408.936	2.49363	0.322598	7.72982	1.07696e-14	1.38991e-14
ACSL6	1411.52	2.69685	0.369112	7.3063	2.74591e-13	3.46042e-13
ACSM2B	130.514	-9.37268	0.49495	-18.9366	5.69552e-80	1.98874e-79
ACSM3	325.493	-6.52367	0.439497	-14.8435	7.66743e-50	1.71911e-49
ACSM5	328.542	-1.26091	0.355411	-3.54776	0.000388525	0.000426658
ACSM5P1	47.3582	-7.73853	0.582347	-13.2885	2.69844e-40	5.34181e-40
ACSM6	174.275	-11.3076	0.852543	-13.2634	3.77483e-40	7.45693e-40
ACSS1	2101.58	1.5025	0.345261	4.35179	1.35033e-05	1.5202e-05
ACSS2	1116.5	3.7752	0.224401	16.8235	1.64173e-63	4.55817e-63
ACSS3	3186.27	4.5203	0.340448	13.2775	3.12638e-40	6.18246e-40
ACTA2	3126.09	0.92563	0.370523	2.49817	0.0124835	0.0132956
ACTA2-AS1	136.483	-2.14527	0.314031	-6.83139	8.40945e-12	1.03627e-11
ACTB	106258	2.33814	0.160996	14.5229	8.67018e-48	1.89088e-47
ACTBL2	642.938	-13.4676	0.300793	-44.7738	0	0
ACTBP1	382.561	-10.751	0.327819	-32.7955	6.8295e-236	6.64329e-235
ACTBP12	227.548	-10.6073	0.44157	-24.0219	1.64232e-127	8.38962e-127
ACTBP13	60.1304	-7.85005	0.293167	-26.7767	6.03875e-158	3.78943e-157
ACTBP2	104.117	-5.6586	0.275602	-20.5318	1.11969e-93	4.46671e-93
ACTBP6	230.706	-12.4578	0.342763	-36.3452	3.13209e-289	4.17396e-288
ACTBP7	466.846	-3.93439	0.350234	-11.2336	2.78875e-29	4.74501e-29
ACTBP8	174.188	-8.98585	0.401872	-22.36	9.65356e-111	4.38303e-110
ACTBP9	64.6493	-6.47721	0.281496	-23.0099	3.70792e-117	1.75346e-116
ACTC1	6039.4	-10.3813	0.43641	-23.7879	4.45369e-125	2.23645e-124
ACTG1	53319.6	8.65406	0.214812	40.2867	0	0
ACTG1P1	215.189	-2.70532	0.233723	-11.5749	5.52428e-31	9.62302e-31
ACTG1P10	1994.04	-10.6804	0.294368	-36.2824	3.06453e-288	4.05106e-287
ACTG1P11	626.01	-14.2521	0.302913	-47.0503	0	0
ACTG1P12	55.1002	-4.09681	0.666002	-6.15135	7.68259e-10	9.20517e-10
ACTG1P13	882.228	-15.2183	1.39272	-10.9271	8.55752e-28	1.42119e-27
ACTG1P14	574.219	-5.60212	0.221533	-25.288	4.33203e-141	2.42551e-140
ACTG1P2	181.586	-12.5843	0.327478	-38.4278	0	0
ACTG1P3	335.718	-3.63918	0.156836	-23.2037	4.17738e-119	2.0076e-118
ACTG1P4	572.881	-14.5955	0.296758	-49.1832	0	0
ACTG1P9	97.3915	-6.42088	0.520914	-12.3262	6.54804e-35	1.20642e-34
ACTG2	1899.46	-5.8183	0.472659	-12.3097	8.03007e-35	1.47791e-34
ACTL10	3510.36	-10.1187	0.329239	-30.7335	2.02892e-207	1.68498e-206
ACTL6A	4734.79	-4.81374	0.136548	-35.2531	3.08044e-272	3.68489e-271
ACTL6B	2496.07	-7.29068	0.693003	-10.5204	6.95728e-26	1.11372e-25
ACTL7A	41.7761	-10.7586	0.775368	-13.8755	8.91955e-44	1.84794e-43
ACTN1	8910.82	12.4553	0.528592	23.5632	9.18697e-123	4.52855e-122
ACTN2	2359.48	-0.89071	0.33821	-2.6336	0.00844844	0.00903427
ACTN4	8243.62	5.66031	0.174873	32.3681	7.72844e-230	7.27026e-229
ACTR10	1053.97	11.757	0.734684	16.0028	1.22062e-57	3.08238e-57
ACTR1A	2625.99	1.52416	0.164281	9.27772	1.73144e-20	2.48783e-20
ACTR2	5069.33	10.2559	0.30408	33.7275	2.28425e-249	2.41107e-248
ACTR3	5963.84	11.8674	0.483589	24.5404	5.48104e-133	2.90667e-132
ACTR3B	549.272	9.7422	0.718487	13.5593	6.97788e-42	1.40719e-41
ACTR3BP1	409.986	-14.1128	1.39813	-10.094	5.87244e-24	9.05702e-24
ACTR3BP3	634.71	-14.7433	1.41221	-10.4399	1.62996e-25	2.59219e-25
ACTR3BP4	129.403	-10.6402	0.384896	-27.6445	3.24991e-168	2.16e-167
ACTR3BP6	195.134	-12.9826	0.327446	-39.6482	0	0
ACTR3C	133.038	-1.5294	0.505669	-3.0245	0.00249043	0.00269413
ACTR5	1315.38	-3.95894	0.127746	-30.9906	7.21725e-211	6.11548e-210
ACTR6	892.672	-1.89285	0.153968	-12.2938	9.77986e-35	1.79819e-34
ACTR8	1696.18	-0.556403	0.120256	-4.62682	3.71321e-06	4.21989e-06
ACTRT1	401.527	-11.1947	0.610109	-18.3487	3.38116e-75	1.10918e-74
ACTRT3	23.5773	2.23414	0.53288	4.19257	2.75806e-05	3.08809e-05
ACVR1	844.87	1.15062	0.189474	6.07273	1.25755e-09	1.50212e-09
ACVR1B	1234.59	10.1097	0.567013	17.8298	4.15018e-71	1.29137e-70
ACVR1C	138.614	-2.36554	0.513277	-4.6087	4.05193e-06	4.60165e-06
ACVR2A	829.069	-1.05869	0.121366	-8.72314	2.70602e-18	3.71537e-18
ACVR2B	1257.24	4.99888	0.267354	18.6976	5.17841e-78	1.76688e-77
ACVR2B-AS1	52.5389	-1.9559	0.270005	-7.24397	4.35747e-13	5.47322e-13
ACY1	223.191	-2.41935	0.126052	-19.1933	4.20637e-82	1.50658e-81
ACY3	79.2586	-3.09452	0.465232	-6.65156	2.90011e-11	3.54465e-11
ACYP1	413.314	-2.40279	0.19851	-12.1041	1.00461e-33	1.8218e-33
ACYP2	710.793	0.757073	0.124063	6.10233	1.04535e-09	1.24973e-09
AD000091.3	57.7868	-10.2797	0.355316	-28.9312	4.84285e-184	3.55381e-183
AD000092.3	47.1267	0.547295	0.261109	2.09604	0.0360783	0.0380173
AD000671.6	32.8393	-5.69148	0.294051	-19.3554	1.83507e-83	6.65969e-83
AD000684.2	135.998	-7.35703	0.613007	-12.0016	3.48689e-33	6.28036e-33
AD000864.6	41.3578	-4.21645	0.304034	-13.8684	9.85011e-44	2.03993e-43
AD001527.7	988.82	-14.7351	0.313687	-46.9739	0	0
ADA	1661.39	-5.43696	0.314856	-17.2681	8.17933e-67	2.39008e-66
ADAD1	232.869	-12.3532	0.348235	-35.4738	1.24518e-275	1.51923e-274
ADAD1P2	204.26	-13.1079	0.32841	-39.9131	0	0
ADAD2	416.603	-6.68228	0.417816	-15.9934	1.42111e-57	3.58524e-57
ADAL	567.3	1.47319	0.159095	9.25982	2.04787e-20	2.93863e-20
ADAM10	4342.92	4.15617	0.154913	26.829	1.48278e-158	9.33591e-158
ADAM11	207.466	8.68613	0.836282	10.3866	2.8531e-25	4.52152e-25
ADAM12	2192.53	13.1745	0.806511	16.3352	5.5434e-60	1.45317e-59
ADAM15	2031.14	13.0642	0.7428	17.5878	3.05277e-69	9.2441e-69
ADAM17	2869.59	13.2021	0.728748	18.1162	2.37505e-73	7.60439e-73
ADAM19	1509.21	12.6357	0.809886	15.6018	7.07188e-55	1.70902e-54
ADAM20	278.792	4.54355	0.306497	14.8241	1.02332e-49	2.29107e-49
ADAM20P1	218.589	9.84818	0.77949	12.6341	1.369e-36	2.5827e-36
ADAM21	259.158	-6.74545	0.347963	-19.3855	1.02273e-83	3.71829e-83
ADAM21P1	478.453	-10.5568	0.346282	-30.4862	3.96864e-204	3.24766e-203
ADAM22	2514.85	2.49848	0.236218	10.577	3.80999e-26	6.13073e-26
ADAM23	3915.97	-3.25953	0.275617	-11.8263	2.85401e-32	5.06722e-32
ADAM28	1365.87	9.41579	0.534296	17.6228	1.64661e-69	5.00802e-69
ADAM32	480.578	10.9847	0.789704	13.9099	5.51717e-44	1.14647e-43
ADAM33	758.513	11.6432	0.972951	11.9669	5.2975e-33	9.51286e-33
ADAM8	823.832	8.72694	0.656948	13.2841	2.86388e-40	5.66677e-40
ADAM9	9097.44	7.72916	0.246105	31.4059	1.67928e-216	1.46591e-215
ADAMDEC1	98.7246	8.34043	0.902662	9.23982	2.46911e-20	3.53906e-20
ADAMTS1	2144.35	6.96645	0.373007	18.6764	7.69895e-78	2.6201e-77
ADAMTS10	1060.38	4.55272	0.288117	15.8016	3.03092e-56	7.4807e-56
ADAMTS12	552.715	2.97356	0.440046	6.75737	1.40517e-11	1.72596e-11
ADAMTS13	329.26	2.68122	0.240672	11.1405	7.96346e-29	1.34556e-28
ADAMTS14	835.018	4.28645	0.535819	7.9998	1.24617e-15	1.63476e-15
ADAMTS15	669.416	2.2487	0.508538	4.4219	9.7837e-06	1.10476e-05
ADAMTS16	69.9398	2.11049	0.588098	3.58867	0.000332374	0.000365424
ADAMTS17	151.711	3.10726	0.42813	7.25775	3.93588e-13	4.94652e-13
ADAMTS18	387.049	5.99026	0.636851	9.40606	5.15073e-21	7.47891e-21
ADAMTS19	51.0342	5.55109	0.828184	6.70272	2.04571e-11	2.50572e-11
ADAMTS2	618.988	11.3498	0.853238	13.3021	2.25139e-40	4.46255e-40
ADAMTS3	437.079	7.79221	0.665848	11.7027	1.2348e-31	2.17269e-31
ADAMTS4	1157.49	8.31447	0.507438	16.3852	2.43978e-60	6.43616e-60
ADAMTS5	324.581	1.96443	0.345854	5.67996	1.34727e-08	1.58581e-08
ADAMTS6	765.735	7.18377	0.393616	18.2507	2.04181e-74	6.63355e-74
ADAMTS7	259.497	10.0956	0.799518	12.6271	1.49635e-36	2.82094e-36
ADAMTS8	138.002	8.82388	0.878418	10.0452	9.64661e-24	1.4824e-23
ADAMTS9	7970.66	15.0366	0.811113	18.5383	1.01411e-76	3.39711e-76
ADAMTS9-AS2	636.09	3.55146	0.32724	10.8528	1.93496e-27	3.19011e-27
ADAMTSL1	716.519	3.68401	0.653821	5.63458	1.75484e-08	2.06185e-08
ADAMTSL3	140.214	2.05516	0.3679	5.58619	2.32103e-08	2.72089e-08
ADAMTSL4	256.7	5.24278	0.443244	11.8282	2.79001e-32	4.95393e-32
ADAMTSL4-AS1	483.501	10.9936	0.77179	14.2443	4.86484e-46	1.03891e-45
ADAMTSL5	119.992	-5.73787	0.538662	-10.6521	1.70511e-26	2.76078e-26
ADAP1	162.177	-1.22121	0.346083	-3.52865	0.000417689	0.00045836
ADAP2	1359.17	2.04207	0.28206	7.23985	4.49176e-13	5.64028e-13
ADAR	12661.2	6.84033	0.174186	39.2703	0	0
ADARB1	771.253	5.95542	0.275481	21.6182	1.21049e-103	5.2477e-103
ADARB2	249.024	-1.48798	0.509961	-2.91783	0.00352478	0.00380151
ADAT1	1146.36	3.90099	0.16683	23.3831	6.35406e-121	3.09155e-120
ADAT2	339.46	4.48014	0.250264	17.9017	1.14425e-71	3.58889e-71
ADAT3	114.618	-2.25007	0.241461	-9.31854	1.17952e-20	1.69935e-20
ADCK1	316.216	1.92297	0.192577	9.98544	1.76518e-23	2.70088e-23
ADCK2	1136.88	11.8664	0.746749	15.8908	7.33789e-57	1.82756e-56
ADCK3	1194.9	6.97531	0.266588	26.1651	6.63291e-151	3.96722e-150
ADCK4	1424.05	11.4703	0.727361	15.7698	5.02058e-56	1.23509e-55
ADCK5	206.467	5.56471	0.305236	18.2308	2.93761e-74	9.52271e-74
ADCY1	1801.94	4.36368	0.473227	9.22111	2.94053e-20	4.20649e-20
ADCY10	47.3248	5.62382	0.618453	9.09336	9.60273e-20	1.35839e-19
ADCY10P1	350.607	10.5298	0.751465	14.0124	1.30944e-44	2.74467e-44
ADCY2	2898.7	13.5774	0.832931	16.3007	9.75868e-60	2.54928e-59
ADCY3	1694.38	12.442	0.73797	16.8598	8.88389e-64	2.47441e-63
ADCY4	199.068	2.07714	0.266564	7.7923	6.5799e-15	8.52495e-15
ADCY5	422.405	10.7985	0.801207	13.4778	2.11343e-41	4.24025e-41
ADCY6	2144.51	13.1426	0.730826	17.9832	2.63914e-72	8.34727e-72
ADCY7	1677.09	7.97452	0.376384	21.1872	1.25385e-99	5.24293e-99
ADCY8	1554.12	7.86862	0.548535	14.3448	1.14845e-46	2.47105e-46
ADCY9	1263.95	9.95033	0.545886	18.2279	3.10246e-74	1.00521e-73
ADCYAP1	32.9425	7.1168	0.916811	7.76256	8.3233e-15	1.07667e-14
ADCYAP1R1	10403.2	11.6701	0.51875	22.4966	4.47803e-112	2.04838e-111
ADD1	9148.02	15.2354	0.728289	20.9194	3.5641e-97	1.46172e-96
ADD2	3048.25	13.2892	0.79166	16.7865	3.06154e-63	8.46268e-63
ADD3	4577.92	14.2366	0.76126	18.7014	4.8221e-78	1.64595e-77
ADD3-AS1	65.7017	5.64911	0.699494	8.076	6.69276e-16	8.81318e-16
ADH5	2884.32	12.1415	0.704393	17.2368	1.40576e-66	4.09774e-66
ADH5P3	99.2173	8.70794	0.777747	11.1964	4.24777e-29	7.20419e-29
ADHFE1	469.153	10.5893	0.77839	13.6041	3.78721e-42	7.66568e-42
ADI1	1430.13	12.5581	0.743735	16.8852	5.77878e-64	1.61314e-63
ADIPOR1	2268.13	12.8628	0.731412	17.5863	3.13913e-69	9.50451e-69
ADIPOR2	2597.78	12.3387	0.729435	16.9153	3.46761e-64	9.71277e-64
ADIRF	692.184	-4.06927	0.47655	-8.53903	1.35351e-17	1.83575e-17
ADK	535.6	0.545773	0.138609	3.93751	8.23303e-05	9.15156e-05
ADM2	716.898	-7.36526	0.481463	-15.2977	7.92383e-53	1.85522e-52
ADM5	233.953	-5.48247	0.25868	-21.194	1.08507e-99	4.53932e-99
ADNP	4711.6	14.2781	0.733978	19.4531	2.74395e-84	1.00343e-83
ADNP2	1591.63	7.07962	0.202564	34.9501	1.28918e-267	1.50718e-266
ADNP-AS1	1024.44	-7.31456	0.237065	-30.8547	4.85084e-209	4.06188e-208
ADO	2721.6	-4.01936	0.121632	-33.0452	1.8231e-239	1.81709e-238
ADORA1	2137.37	0.67997	0.290322	2.34212	0.0191746	0.0203404
ADORA2A	734.637	-6.62523	0.365956	-18.1039	2.96954e-73	9.49279e-73
ADORA2B	194.41	9.31804	0.803877	11.5914	4.55758e-31	7.95436e-31
ADORA2BP1	130.874	-9.04684	0.441623	-20.4854	2.90477e-93	1.15388e-92
ADORA3	1455.94	6.5241	0.39726	16.4228	1.31449e-60	3.47809e-60
ADPGK	2930.39	-0.962114	0.182765	-5.2642	1.40798e-07	1.63156e-07
ADPGK-AS1	79.9542	-3.56353	0.380885	-9.35592	8.28764e-21	1.19874e-20
ADPRH	3040.27	-5.48549	0.228934	-23.961	7.09171e-127	3.60732e-126
ADPRHL1	132.829	-2.91786	0.244079	-11.9546	6.14404e-33	1.10232e-32
ADPRHL2	904.575	5.95348	0.219406	27.1345	3.85952e-162	2.48599e-161
ADPRM	191.738	1.18849	0.16537	7.18686	6.6298e-13	8.30399e-13
ADRA1A	3071.71	-5.8411	0.482277	-12.1115	9.17974e-34	1.66618e-33
ADRA1B	56.4086	0.976999	0.374651	2.60776	0.00911375	0.00973859
ADRA1D	1149.4	-6.87155	0.55997	-12.2713	1.29187e-34	2.37251e-34
ADRA2A	122.428	-2.96023	0.521921	-5.67181	1.413e-08	1.6625e-08
ADRA2C	126.12	-5.48032	0.471048	-11.6343	2.75734e-31	4.82649e-31
ADRB1	109.116	3.04932	0.423048	7.20797	5.67934e-13	7.12097e-13
ADRB2	195.708	1.56194	0.356729	4.3785	1.19498e-05	1.3468e-05
ADRBK1	2109.5	6.35096	0.209634	30.2955	1.31588e-201	1.06261e-200
ADRBK2	1298.98	1.88494	0.20487	9.20068	3.55699e-20	5.08117e-20
ADSL	1228.44	3.52087	0.176698	19.9259	2.42666e-88	9.24833e-88
ADSS	1388.28	0.661696	0.13198	5.01361	5.34174e-07	6.13749e-07
ADSSL1	294.562	6.60906	0.472362	13.9915	1.75654e-44	3.67566e-44
AE000658.25	993.341	-13.7161	0.290502	-47.2151	0	0
AE000658.26	270.462	-13.5126	1.39786	-9.66665	4.17837e-22	6.20233e-22
AE000658.30	539.744	-14.2739	0.341259	-41.8272	0	0
AE000661.36	383.274	-9.58163	0.678063	-14.1309	2.45063e-45	5.18838e-45
AE000661.50	622.297	-14.4792	0.325975	-44.4183	0	0
AEBP2	2119.22	-2.55679	0.159061	-16.0743	3.86222e-58	9.82958e-58
AEN	2145.6	-2.01096	0.227319	-8.84642	9.03691e-19	1.25268e-18
AES	4967.45	0.772523	0.195441	3.95272	7.72672e-05	8.59203e-05
AF001548.3	461.612	-10.9567	0.635584	-17.2388	1.35737e-66	3.95711e-66
AF001548.4	45.3593	-7.96985	0.567139	-14.0527	7.41064e-45	1.55978e-44
AF001548.5	1282.23	-7.07986	0.314923	-22.4812	6.33641e-112	2.89544e-111
AF001548.6	723.128	-10.0225	0.442589	-22.6452	1.5554e-113	7.18487e-113
AF001550.7	45.5287	-10.4661	0.403533	-25.9362	2.60477e-148	1.52669e-147
AF003529.2	366.615	-13.9515	1.40199	-9.95119	2.49195e-23	3.80383e-23
AF003626.1	535.345	-14.2619	0.30171	-47.2702	0	0
AF011889.2	62.084	-2.55336	0.294219	-8.67844	4.01222e-18	5.49416e-18
AF013593.1	485.688	-10.5439	0.507396	-20.7803	6.5197e-96	2.65237e-95
AF038458.3	782.758	-8.84663	0.238918	-37.0278	4.08389e-300	5.83575e-299
AF038458.5	1014.72	-10.7041	0.354399	-30.2036	2.12276e-200	1.69647e-199
AF064858.10	1738.65	-11.0374	0.414595	-26.6221	3.76918e-156	2.33239e-155
AF064858.7	38.7184	-6.57643	0.504251	-13.042	7.06032e-39	1.37214e-38
AF064860.5	43.6314	6.43541	0.828518	7.76738	8.01245e-15	1.03667e-14
AF064860.7	964.712	-6.70084	0.381748	-17.5531	5.63667e-69	1.69921e-68
AF067845.1	312.764	-10.7347	0.608088	-17.6533	9.60627e-70	2.93218e-69
AF096876.1	3588.86	-17.1249	1.17418	-14.5846	3.52082e-48	7.71826e-48
AF104455.1	862.585	-13.2374	0.289356	-45.7478	0	0
AF121897.4	32.5013	1.87327	0.467794	4.00447	6.21567e-05	6.92025e-05
AF124730.4	496.899	-11.5687	0.529507	-21.8481	8.09623e-106	3.55858e-105
AF127577.10	1456.5	-15.3526	0.339688	-45.1962	0	0
AF127577.11	5711.86	-16.5609	0.363742	-45.5293	0	0
AF127577.12	1344	-12.9911	0.240116	-54.1036	0	0
AF127577.13	222.619	-10.9405	0.418091	-26.1677	6.19263e-151	3.70473e-150
AF127577.8	44.0169	-10.0019	1.30666	-7.65458	1.93949e-14	2.49316e-14
AF127936.3	633.095	-7.30057	0.293451	-24.8783	1.27698e-136	6.93709e-136
AF127936.5	573.664	-5.45776	0.297284	-18.3588	2.80835e-75	9.22193e-75
AF127936.7	60.1676	2.2596	0.302796	7.46244	8.49339e-14	1.07966e-13
AF127936.9	190.328	6.30553	0.485428	12.9896	1.40143e-38	2.71259e-38
AF129075.5	28.2682	6.17269	0.749996	8.23029	1.86758e-16	2.48127e-16
AF129408.17	179.756	-7.37427	0.313249	-23.5412	1.54444e-122	7.60305e-122
AF131215.1	35.6044	-10.4089	0.687176	-15.1473	7.89528e-52	1.82145e-51
AF131215.2	1099.58	-2.73279	0.272026	-10.046	9.56346e-24	1.46979e-23
AF131215.3	403.164	-1.56139	0.268729	-5.81028	6.23674e-09	7.37565e-09
AF131215.4	287.701	8.80627	0.752717	11.6993	1.28491e-31	2.26041e-31
AF131215.6	138.074	-3.90977	0.293966	-13.3001	2.31299e-40	4.58362e-40
AF131215.8	486.188	-8.90032	0.288617	-30.8378	8.16272e-209	6.82424e-208
AF131215.9	642.518	-2.6652	0.255544	-10.4295	1.81805e-25	2.88887e-25
AF131216.5	49.6952	-2.47347	0.599051	-4.12897	3.64385e-05	4.07294e-05
AF131217.1	42.5536	1.23928	0.428823	2.88996	0.00385286	0.0041516
AF146191.4	247.52	-4.32064	0.218163	-19.8046	2.71487e-87	1.02369e-86
AF178030.2	66.826	-9.80932	0.39995	-24.5264	7.72831e-133	4.09596e-132
AF186192.1	197.444	-9.20765	0.53875	-17.0908	1.73836e-65	4.97624e-65
AF186192.5	50.1964	3.12338	0.599466	5.21027	1.88566e-07	2.18182e-07
AF196970.3	28.7893	1.1291	0.292378	3.86179	0.000112558	0.000124805
AF228730.5	1419.48	-15.7868	0.314181	-50.2473	0	0
AF230666.2	108.628	-9.8498	0.31064	-31.7081	1.20139e-220	1.06898e-219
AF235103.1	303.101	-10.4799	0.291391	-35.9652	2.9342e-283	3.7597e-282
AF238380.8	377.506	-13.9349	0.310686	-44.852	0	0
AF241734.1	601.323	-14.6653	1.40205	-10.4599	1.31981e-25	2.10199e-25
AF277315.19	2901.32	-16.5236	0.409946	-40.3068	0	0
AFAP1	3032.91	4.34251	0.200933	21.6118	1.3918e-103	6.02875e-103
AFAP1L2	1214.11	-2.26597	0.293061	-7.73208	1.05807e-14	1.36586e-14
AFF2	4986.69	-8.2142	0.666794	-12.319	7.16205e-35	1.3188e-34
AFF2-IT1	897.121	-11.4299	0.836965	-13.6563	1.85126e-42	3.76276e-42
AFF3	942.269	6.74941	0.393433	17.1551	5.75275e-66	1.65925e-65
AFF4	9130.64	3.01995	0.0883624	34.1769	5.33653e-256	5.8684e-255
AFG3L1P	1157.77	12.2533	0.734467	16.6833	1.73465e-62	4.7401e-62
AFG3L2	2250.88	9.33232	0.325938	28.6322	2.66832e-180	1.91271e-179
AFMID	415.255	9.6936	0.739708	13.1046	3.09803e-39	6.04861e-39
AFP	597.667	-8.82789	0.713705	-12.3691	3.84162e-35	7.09822e-35
AFTPH	5814.93	-3.92628	0.118193	-33.2194	5.6546e-242	5.72493e-241
AGA	723.671	-1.52555	0.174107	-8.76214	1.91572e-18	2.63966e-18
AGAP1	4317.98	1.50074	0.215846	6.95284	3.58009e-12	4.4345e-12
AGAP10	774.719	-4.12949	0.307573	-13.4261	4.25479e-41	8.50732e-41
AGAP1-IT1	2451.86	-7.13687	0.27751	-25.7175	7.4452e-146	4.29479e-145
AGAP2	1089.91	0.881043	0.354289	2.48679	0.01289	0.0137252
AGAP2-AS1	714.205	-4.16979	0.296679	-14.0549	7.18638e-45	1.51294e-44
AGAP3	1816.24	12.9029	0.73301	17.6026	2.35313e-69	7.13537e-69
AGAP4	191.446	8.93481	0.741329	12.0524	1.88338e-33	3.40342e-33
AGAP5	229.005	-4.96381	0.154132	-32.2049	1.50836e-227	1.40089e-226
AGAP6	433.803	10.4761	0.729117	14.3682	8.19071e-47	1.76538e-46
AGAP7P	221.134	-7.01555	0.67413	-10.4068	2.3079e-25	3.66303e-25
AGBL1-AS1	181.894	-11.4674	0.428527	-26.76	9.45419e-158	5.92278e-157
AGBL2	459.442	-3.78748	0.312675	-12.1132	8.99666e-34	1.63329e-33
AGBL3	323.912	10.0551	0.76614	13.1243	2.38964e-39	4.67561e-39
AGBL4	235.235	9.95427	0.838266	11.8748	1.59966e-32	2.85036e-32
AGBL4-IT1	26.6377	6.81339	0.888074	7.67209	1.69213e-14	2.17774e-14
AGBL5	771.151	10.5866	0.731101	14.4804	1.61212e-47	3.50687e-47
AGER	125.926	9.0517	0.751633	12.0427	2.11866e-33	3.82465e-33
AGFG1	3961.68	14.0281	0.73164	19.1735	6.1654e-82	2.20284e-81
AGFG2	1529.99	11.5722	0.76242	15.1783	4.92562e-52	1.14045e-51
AGGF1	1870.66	12.2242	0.728751	16.7742	3.77205e-63	1.04124e-62
AGGF1P1	82.2077	-6.04304	0.694045	-8.70699	3.12053e-18	4.27936e-18
AGGF1P2	35.4877	-3.74041	0.579805	-6.45116	1.10997e-10	1.34497e-10
AGGF1P3	132.525	-2.22665	0.399483	-5.57382	2.49211e-08	2.92066e-08
AGK	1549.88	10.9414	0.659906	16.5803	9.68099e-62	2.60775e-61
AGKP1	73.098	9.11533	1.96363	4.64208	3.44915e-06	3.9215e-06
AGL	2011.36	11.0416	0.622482	17.7381	2.13082e-70	6.56422e-70
AGMAT	39.6398	5.20087	0.63358	8.2087	2.23599e-16	2.96684e-16
AGMO	188.053	8.20086	0.896696	9.14564	5.92757e-20	8.42679e-20
AGO1	3391.46	13.0825	0.733405	17.838	3.58425e-71	1.11659e-70
AGO2	5233.07	2.98194	0.144457	20.6424	1.14314e-94	4.60002e-94
AGO3	3655.6	1.75201	0.131392	13.3342	1.46489e-40	2.90843e-40
AGO4	1757.54	7.01624	0.195542	35.881	6.05321e-282	7.69618e-281
AGPAT1	1702.17	3.95869	0.110401	35.8573	1.41606e-281	1.79693e-280
AGPAT2	308.543	1.71775	0.232939	7.37427	1.65254e-13	2.09086e-13
AGPAT4	2207.3	1.46659	0.221501	6.62115	3.56417e-11	4.35124e-11
AGPAT4-IT1	1025.99	-4.13233	0.240154	-17.207	2.35434e-66	6.83554e-66
AGPAT5	7916.03	-2.85604	0.19419	-14.7074	5.77556e-49	1.28063e-48
AGPAT9	63.9202	3.63694	0.459435	7.91612	2.45046e-15	3.19752e-15
AGPS	1886.98	12.958	0.729704	17.7579	1.49707e-70	4.62544e-70
AGRN	4315.51	14.1515	0.764989	18.4989	2.10703e-76	7.02601e-76
AGT	12189.1	15.2888	0.867682	17.6203	1.72196e-69	5.23355e-69
AGTPBP1	1657.97	12.4107	0.746045	16.6353	3.86748e-62	1.04919e-61
AGTRAP	851.966	11.8109	0.745456	15.8438	1.55136e-56	3.84485e-56
AHCTF1	3953.92	14.0252	0.733345	19.125	1.56319e-81	5.56244e-81
AHCY	2956.32	13.6058	0.737884	18.4389	6.40585e-76	2.12074e-75
AHCYL1	13492.1	13.3291	0.633423	21.043	2.65127e-98	1.09797e-97
AHCYL2	4417.6	14.1852	0.785027	18.0697	5.51926e-73	1.75922e-72
AHDC1	1461.92	6.71838	0.291692	23.0324	2.20676e-117	1.04583e-116
AHI1	2557.31	13.3966	0.743317	18.0227	1.29347e-72	4.10493e-72
AHNAK	34476	11.1999	0.295677	37.8789	0	0
AHNAK2	3370.38	7.95077	0.488637	16.2713	1.57739e-59	4.10595e-59
AHR	3389.21	13.8029	0.834722	16.5359	2.02255e-61	5.41867e-61
AHRR	127.393	9.06915	0.765236	11.8514	2.11523e-32	3.76266e-32
AHSA1	1495	9.03026	0.365625	24.6981	1.12021e-134	6.00976e-134
AHSA2	3850.86	13.9871	0.735221	19.0244	1.07131e-80	3.7698e-80
AIDA	849.412	2.69461	0.148101	18.1944	5.71558e-74	1.8446e-73
AIF1	889.537	3.10046	0.341587	9.07665	1.11972e-19	1.58182e-19
AIF1L	3562.55	11.8272	0.694843	17.0215	5.69343e-65	1.61765e-64
AIFM1	704.127	9.52918	0.597245	15.9552	2.62058e-57	6.57846e-57
AIFM2	349.832	8.29674	0.583631	14.2157	7.31996e-46	1.55929e-45
AIFM3	241.171	9.99016	0.919394	10.866	1.67324e-27	2.76173e-27
AIG1	1050.02	4.0351	0.153302	26.3212	1.09568e-152	6.62118e-152
AIM1	854.668	5.86503	0.447409	13.1089	2.92859e-39	5.71992e-39
AIM2	50.1165	7.36236	0.848738	8.67448	4.15427e-18	5.6869e-18
AIMP1	1008.13	8.461	0.35368	23.9227	1.77654e-126	9.00703e-126
AIMP2	676.892	11.4794	0.732444	15.6727	2.32409e-55	5.66122e-55
AIP	798.373	10.9957	0.731392	15.034	4.39878e-51	1.00275e-50
AIRE	76.592	8.33485	0.863605	9.65123	4.85677e-22	7.19796e-22
AJ003147.11	44.5685	4.35247	0.487668	8.92506	4.45438e-19	6.21519e-19
AJAP1	390.218	5.74128	0.633497	9.06285	1.27086e-19	1.79273e-19
AJUBA	445.234	10.8746	0.757066	14.3641	8.6967e-47	1.87367e-46
AK1	335.159	10.4651	0.794263	13.1758	1.20898e-39	2.37558e-39
AK2	3205.43	13.7224	0.729957	18.799	7.6969e-79	2.6527e-78
AK3	1860.21	12.9374	0.763325	16.9488	1.96424e-64	5.52361e-64
AK3P3	104.765	8.78689	0.752683	11.6741	1.72915e-31	3.03603e-31
AK4	3649.04	13.9095	0.780837	17.8135	5.55069e-71	1.72389e-70
AK4P1	30.2596	6.99493	0.780617	8.96077	3.2243e-19	4.51011e-19
AK5	440.73	3.41497	0.569404	5.99746	2.00432e-09	2.38589e-09
AK7	37.2681	4.10243	0.708365	5.7914	6.98027e-09	8.2516e-09
AK8	144.507	9.25149	0.795878	11.6242	3.1031e-31	5.42918e-31
AK9	396.094	10.706	0.775551	13.8044	2.39866e-43	4.93875e-43
AKAP1	1431.39	8.65795	0.347768	24.8958	8.27153e-137	4.50462e-136
AKAP10	1830.85	12.5538	0.725079	17.3136	3.71138e-67	1.08995e-66
AKAP11	5354.82	11.8779	0.503333	23.5986	3.98583e-123	1.97251e-122
AKAP12	14592.2	15.9091	0.823923	19.3089	4.51761e-83	1.63431e-82
AKAP13	11124.2	15.5176	0.737408	21.0434	2.62864e-98	1.08877e-97
AKAP17A	1241.46	12.354	0.73602	16.7849	3.14922e-63	8.70321e-63
AKAP2	113.137	8.89758	0.773419	11.5042	1.25628e-30	2.1787e-30
AKAP3	88.0881	6.51704	0.660203	9.87126	5.54626e-23	8.4036e-23
AKAP5	160.435	9.40212	0.814982	11.5366	8.62652e-31	1.49952e-30
AKAP6	4390.73	14.1764	0.754746	18.783	1.04072e-78	3.57977e-78
AKAP7	536.312	11.143	0.772643	14.422	3.76376e-47	8.14893e-47
AKAP8	1365.06	8.25496	0.304555	27.105	8.60156e-162	5.5269e-161
AKAP8L	2329.07	12.901	0.7294	17.6871	5.26966e-70	1.61505e-69
AKAP9	6854.25	14.0976	0.733436	19.2213	2.45469e-82	8.81228e-82
AKIP1	509.098	11.0681	0.730577	15.1498	7.60378e-52	1.75436e-51
AKIRIN1	2135.22	13.1365	0.730334	17.9869	2.46779e-72	7.80909e-72
AKIRIN2	681.722	11.4891	0.73449	15.6423	3.74748e-55	9.09223e-55
AKNA	1665.16	9.99727	0.521147	19.1832	5.11213e-82	1.82875e-81
AKNAD1	143.278	2.91564	0.653496	4.46161	8.13478e-06	9.20105e-06
AKR1A1	1641.25	4.93012	0.181499	27.1634	1.7594e-162	1.13521e-161
AKR1B1	2284.16	12.5122	0.751575	16.648	3.1272e-62	8.49942e-62
AKR1B1P1	27.6542	6.86353	0.755669	9.08272	1.05895e-19	1.49638e-19
AKR1C1	83.2706	6.20026	0.697071	8.89473	5.85636e-19	8.14932e-19
AKR1C2	29.2839	4.92097	0.791107	6.22035	4.96033e-10	5.95833e-10
AKR1C3	173.989	9.51916	0.900589	10.5699	4.10804e-26	6.60466e-26
AKR1E2	49.8457	7.71416	0.848752	9.08883	1.00113e-19	1.41574e-19
AKR7A2	1094.94	5.17321	0.198485	26.0635	9.45595e-150	5.60977e-149
AKR7A3	76.3272	8.32979	0.75247	11.0699	1.75541e-28	2.95146e-28
AKR7L	53.9472	7.8289	0.762332	10.2697	9.65329e-25	1.51332e-24
AKT1	4410.77	8.05039	0.196048	41.0634	0	0
AKT1S1	775.413	11.6748	0.729961	15.9938	1.41163e-57	3.56166e-57
AKT2	4355.18	14.1647	0.74256	19.0754	4.04004e-81	1.43025e-80
AKT3	4518.03	14.2176	0.743314	19.1274	1.49461e-81	5.31912e-81
AKT3-IT1	112.101	6.65502	0.578094	11.512	1.1478e-30	1.99136e-30
AKTIP	967.458	11.6335	0.735182	15.8239	2.12892e-56	5.26383e-56
AL022341.3	33.1579	1.64296	0.301874	5.44255	5.25242e-08	6.12615e-08
AL022393.9	38.8353	7.35399	0.772996	9.51362	1.84149e-21	2.69724e-21
AL023806.1	104.182	2.92457	0.291517	10.0322	1.09986e-23	1.68908e-23
AL031587.1	25.215	6.36771	0.754157	8.44348	3.08014e-17	4.15165e-17
AL031905.1	100.315	-6.96528	0.218198	-31.9219	1.32743e-223	1.20187e-222
AL035422.1	70.6673	-11.3388	0.389002	-29.1485	8.73127e-187	6.50343e-186
AL035461.1	37.2652	-10.4144	0.496583	-20.9721	1.18042e-97	4.8586e-97
AL049758.2	23.5009	6.26561	0.754013	8.30968	9.59618e-17	1.28305e-16
AL049794.1	27.6668	6.86504	0.77213	8.89104	6.0541e-19	8.42225e-19
AL121989.1	23.8533	6.65027	0.754501	8.81413	1.20619e-18	1.66778e-18
AL132709.8	260.839	10.1031	0.887764	11.3803	5.23893e-30	9.00132e-30
AL133243.1	192.404	9.66431	0.742244	13.0204	9.36714e-39	1.81724e-38
AL133243.2	400.085	10.7204	0.733249	14.6204	2.08076e-48	4.57628e-48
AL133243.4	197.108	5.9475	0.3541	16.7961	2.60565e-63	7.20783e-63
AL133245.2	33.9862	7.1634	0.747331	9.58531	9.21776e-22	1.35846e-21
AL136303.1	25.695	6.76187	0.749153	9.02602	1.78027e-19	2.50354e-19
AL136419.6	70.5968	3.80802	0.328721	11.5843	4.94776e-31	8.62847e-31
AL139147.1	26.6651	6.81239	0.795537	8.56326	1.0972e-17	1.49066e-17
AL163953.3	111.728	-3.66507	0.341883	-10.7202	8.17873e-27	1.33253e-26
AL353626.1	45.9436	6.87607	0.751446	9.15045	5.66989e-20	8.06526e-20
AL353763.1	41.2806	7.44444	0.758432	9.81557	9.64886e-23	1.45452e-22
AL355598.1	56.4128	-8.28087	0.407944	-20.2991	1.31091e-91	5.13373e-91
AL365181.2	106.943	8.81653	0.780343	11.2983	1.33806e-29	2.28765e-29
AL365202.1	79.0471	8.38117	0.768886	10.9004	1.14736e-27	1.90067e-27
AL391001.1	42.7805	7.1324	0.778785	9.15837	5.26879e-20	7.50039e-20
AL391994.1	26.0644	6.77679	0.740126	9.15626	5.37273e-20	7.64587e-20
AL450992.2	48.4837	3.47877	0.553989	6.27948	3.39704e-10	4.0891e-10
AL513327.1	47.9815	7.6589	0.765731	10.0021	1.49234e-23	2.28674e-23
AL583784.1	95.7463	-11.3632	0.318614	-35.6644	1.40897e-278	1.75075e-277
AL589863.1	457.708	-7.3715	0.305821	-24.1039	2.27256e-128	1.16659e-127
AL589931.1	352.823	-13.8961	1.40729	-9.87438	5.37637e-23	8.14901e-23
AL589987.1	962.473	-15.3439	1.40923	-10.8882	1.31204e-27	2.1706e-27
AL589988.1	40.6005	-10.7178	0.366583	-29.237	6.57483e-188	4.93215e-187
AL590007.1	242.496	-7.63408	0.54335	-14.05	7.70167e-45	1.62078e-44
AL590084.1	398.563	-13.8953	0.412878	-33.6547	2.66091e-248	2.79406e-247
AL590096.1	93.8074	-10.8004	0.510503	-21.1565	2.40482e-99	1.00381e-98
AL590113.1	93.6954	-7.97835	0.321781	-24.7943	1.03258e-135	5.57486e-135
AL590126.1	798.948	-15.0753	1.44736	-10.4157	2.10273e-25	3.339e-25
AL590233.1	150.871	-12.6112	0.372595	-33.8469	4.03764e-251	4.31728e-250
AL590410.1	941.014	-15.3114	1.39732	-10.9577	6.10162e-28	1.01667e-27
AL590431.1	697.106	-6.2207	0.13247	-46.9593	0	0
AL590683.2	251.473	-13.3488	0.448564	-29.7588	1.33228e-194	1.03028e-193
AL590684.1	978.359	-15.132	0.336471	-44.9727	0	0
AL590708.1	1525.54	-16.0084	1.40283	-11.4115	3.6623e-30	6.30642e-30
AL590708.2	598.321	-14.5992	0.371521	-39.2959	0	0
AL590731.1	53.6143	-8.42874	0.84682	-9.95341	2.43695e-23	3.7203e-23
AL590762.10	451.974	-14.0768	0.380399	-37.0052	9.43078e-300	1.34179e-298
AL590762.11	6503.24	-17.0403	0.348481	-48.8987	0	0
AL590763.2	4477.27	-17.5617	1.4032	-12.5155	6.1445e-36	1.14873e-35
AL590763.5	132.699	-9.40861	0.235991	-39.8685	0	0
AL590764.1	63.6919	-10.2419	0.328444	-31.1832	1.80061e-213	1.54869e-212
AL590787.1	178.902	-12.8576	0.319482	-40.2453	0	0
AL590822.1	132.872	-12.1914	0.317197	-38.4349	0	0
AL590874.1	159.039	-12.7464	0.355508	-35.8541	1.58486e-281	2.0092e-280
AL590964.1	364.511	-13.8249	0.307614	-44.9425	0	0
AL591063.1	92.0776	-11.9582	0.914446	-13.077	4.45972e-39	8.68911e-39
AL591925.1	49.2817	-10.8184	0.349336	-30.9686	1.42858e-210	1.20972e-209
AL592205.1	120.698	-11.8766	0.32287	-36.7846	3.2571e-296	4.55043e-295
AL592205.2	40.5956	-10.6588	0.321873	-33.1151	1.80293e-240	1.80933e-239
AL592294.1	77.9616	-11.2452	0.360454	-31.1973	1.16058e-213	9.993e-213
AL592310.1	86.9839	-6.69895	0.256439	-26.123	2.00004e-150	1.19218e-149
AL592466.1	126.442	-12.4153	0.323026	-38.4344	0	0
AL592528.1	182.275	-5.80102	0.426634	-13.5972	4.16156e-42	8.4195e-42
AL592549.1	99.4002	-9.40825	0.349236	-26.9395	7.57018e-160	4.79737e-159
AL593844.1	71.7424	-11.598	0.312229	-37.1458	5.1232e-302	7.4054e-301
AL593848.2	50.0586	-6.8846	0.238563	-28.8586	3.95225e-183	2.88097e-182
AL596092.1	116.434	-10.6138	0.481861	-22.0267	1.59777e-107	7.08911e-107
AL596243.1	104.628	-12.0838	0.338923	-35.6537	2.06685e-278	2.56459e-277
AL596268.1	866.575	-15.1925	1.39769	-10.8697	1.60658e-27	2.65272e-27
AL596329.1	48.0782	-11.0207	1.06666	-10.3319	5.05469e-25	7.97402e-25
AL596330.1	80.1366	-4.09221	0.548454	-7.46135	8.56415e-14	1.08855e-13
AL603632.1	122.011	-12.3644	0.373433	-33.11	2.13014e-240	2.13688e-239
AL603650.2	1459.47	-15.9446	1.39435	-11.4351	2.79126e-30	4.81408e-30
AL603766.1	73.0198	-11.0905	0.36637	-30.2712	2.74699e-201	2.2135e-200
AL606500.1	88.6193	-8.04676	0.425364	-18.9174	8.20727e-80	2.85857e-79
AL611946.1	43.637	-10.8809	1.16346	-9.35214	8.58958e-21	1.2418e-20
AL645608.1	61.1056	-11.3666	1.06041	-10.7191	8.2816e-27	1.34904e-26
AL645730.1	105.747	-12.0986	0.341252	-35.4537	2.54625e-275	3.0966e-274
AL645859.1	98.8013	-11.9416	0.4463	-26.757	1.02432e-157	6.414e-157
AL645941.1	991.946	-15.3874	1.39617	-11.0211	3.0218e-28	5.06324e-28
AL645944.1	227.353	-13.2621	1.46672	-9.042	1.53831e-19	2.16652e-19
AL662797.1	69.9256	-10.9689	0.413967	-26.4971	1.04766e-154	6.42849e-154
AL662800.1	89.361	5.22729	0.432337	12.0908	1.18161e-33	2.14055e-33
AL669914.1	110.626	-12.2232	0.393361	-31.0737	5.45166e-212	4.64336e-211
AL671883.1	31.118	-10.2737	1.01141	-10.1578	3.05805e-24	4.74815e-24
AL672183.2	542.758	-9.48409	0.127084	-74.6288	0	0
AL672294.1	1121.75	-12.6794	0.280837	-45.1487	0	0
AL713899.1	149.055	-12.6534	0.332265	-38.0823	0	0
AL732374.1	157.975	-12.7364	0.303917	-41.9077	0	0
AL732375.1	2200.91	-16.5372	1.42231	-11.627	3.0054e-31	5.25861e-31
AL732375.2	467.378	-14.3018	1.39257	-10.2701	9.61426e-25	1.50747e-24
AL732375.3	1130.05	-15.5755	1.40317	-11.1002	1.2515e-28	2.11015e-28
AL732375.7	811.917	-15.0985	1.40812	-10.7225	7.982e-27	1.3008e-26
AL732479.1	59.3884	-6.39623	0.337061	-18.9765	2.66921e-80	9.35505e-80
AL772307.1	80.7503	-6.012	0.409466	-14.6825	8.34282e-49	1.84676e-48
AL807772.1	175.244	-12.8867	0.304642	-42.3011	0	0
AL845259.2	322.753	-13.7676	1.41889	-9.7031	2.92479e-22	4.35529e-22
AL845259.3	1055.83	-15.4775	1.40493	-11.0166	3.17862e-28	5.3243e-28
AL845259.4	548.556	-14.5328	1.39429	-10.4231	1.94433e-25	3.08859e-25
AL845259.5	407.44	-14.1038	1.41172	-9.99052	1.67692e-23	2.56688e-23
AL845259.7	778.924	-15.0387	1.39906	-10.7491	5.98487e-27	9.78122e-27
AL845259.8	210.672	-13.1519	0.334458	-39.3229	0	0
AL845472.1	1613.13	-5.66159	0.264387	-21.414	9.88886e-102	4.21338e-101
AL901608.1	81.8333	-11.7286	0.392035	-29.9172	1.17467e-196	9.19216e-196
AL928874.1	400.338	-11.188	0.544956	-20.5301	1.15897e-93	4.62128e-93
AL953885.1	117.702	-11.8399	0.374683	-31.5999	3.70915e-219	3.27264e-218
AL954742.1	547.914	-14.4724	0.328599	-44.0428	0	0
ALAS1	1140.28	12.2315	0.739185	16.5473	1.67422e-61	4.49186e-61
ALAS2	403.987	-7.20434	0.465376	-15.4807	4.6851e-54	1.11783e-53
ALB	129.926	-4.84352	0.386767	-12.5231	5.58183e-36	1.04435e-35
ALCAM	2890.37	6.86638	0.296918	23.1255	2.56454e-118	1.22443e-117
ALDH1A2	435.87	-3.60263	0.295202	-12.204	2.96018e-34	5.40762e-34
ALDH1A3	622.624	5.46694	0.806204	6.78109	1.19273e-11	1.46626e-11
ALDH1B1	850.577	-1.45701	0.179859	-8.10088	5.4565e-16	7.19534e-16
ALDH1L1	6198.46	1.57498	0.485258	3.24566	0.0011718	0.00127499
ALDH1L1-AS1	1063.48	-10.9276	0.419134	-26.0717	7.62832e-150	4.52757e-149
ALDH1L1-AS2	469.173	-3.47728	0.537593	-6.46823	9.91562e-11	1.20232e-10
ALDH1L2	529.87	4.74461	0.294443	16.1138	2.03962e-58	5.21416e-58
ALDH2	1951.09	-0.592531	0.215885	-2.74466	0.00605738	0.00650041
ALDH3A1	540.18	-6.91006	0.474648	-14.5583	5.17308e-48	1.1312e-47
ALDH3A2	2934.84	3.86174	0.159401	24.2266	1.16638e-129	6.03455e-129
ALDH4A1	1175.93	3.01242	0.310343	9.70672	2.8228e-22	4.20438e-22
ALDH5A1	1282.66	2.36884	0.218214	10.8556	1.87574e-27	3.09364e-27
ALDH6A1	2587.32	13.0527	0.757958	17.2209	1.85148e-66	5.38032e-66
ALDH7A1	3016.18	1.02585	0.30925	3.31721	0.000909215	0.000991703
ALDH7A1P1	97.4382	3.12707	0.418081	7.47959	7.45558e-14	9.48424e-14
ALDH8A1	508.059	-4.66257	0.269302	-17.3136	3.71744e-67	1.09161e-66
ALDH9A1	18143.9	-5.1858	0.142053	-36.5061	8.86389e-292	1.20071e-290
ALDOA	28422.1	-0.718529	0.173966	-4.13028	3.6232e-05	4.05021e-05
ALDOAP1	162.011	-9.79523	0.220342	-44.4547	0	0
ALDOAP2	237.243	-9.63811	0.206163	-46.7499	0	0
ALDOC	5530.48	4.9162	0.440804	11.1528	6.93861e-29	1.17368e-28
ALG1	827.217	1.61701	0.158282	10.216	1.68114e-24	2.62452e-24
ALG10	1217.53	-4.14099	0.155519	-26.6269	3.3159e-156	2.05334e-155
ALG10B	2039.85	-3.82156	0.215304	-17.7496	1.73587e-70	5.35632e-70
ALG12	742.334	1.86588	0.183242	10.1826	2.37182e-24	3.69007e-24
ALG13	2714.92	-2.2903	0.119264	-19.2035	3.45737e-82	1.23882e-81
ALG14	363.242	2.12835	0.157115	13.5464	8.31575e-42	1.67583e-41
ALG1L	562.825	-6.97743	0.354819	-19.6648	4.32238e-86	1.60952e-85
ALG1L10P	190.132	-3.88713	0.261241	-14.8795	4.47874e-50	1.00692e-49
ALG1L11P	459.73	-6.01868	0.286211	-21.0288	3.57355e-98	1.47851e-97
ALG1L12P	110.824	-5.7946	0.255932	-22.6411	1.70605e-113	7.87936e-113
ALG1L14P	614.559	-10.7412	0.798864	-13.4456	3.26914e-41	6.54251e-41
ALG1L15P	49.9431	-9.07585	0.373638	-24.2905	2.47256e-130	1.28607e-129
ALG1L2	1426.25	-9.63391	0.300987	-32.0077	8.5205e-225	7.77071e-224
ALG1L3P	2194.88	-14.7163	0.282545	-52.0849	0	0
ALG1L5P	288.867	-12.4285	0.32382	-38.3808	0	0
ALG1L6P	235.931	-9.26751	0.358841	-25.8263	4.49726e-147	2.61839e-146
ALG1L7P	501.557	-12.5458	0.296421	-42.3241	0	0
ALG1L8P	319.717	-12.8108	0.318057	-40.2784	0	0
ALG1L9P	2400.83	-9.75616	0.240163	-40.6231	0	0
ALG3	585.036	-0.810575	0.167651	-4.8349	1.33212e-06	1.52251e-06
ALG3P1	141.744	-6.45159	0.261658	-24.6566	3.12852e-134	1.67361e-133
ALG5	554.902	2.08258	0.166568	12.5029	7.2005e-36	1.34443e-35
ALG6	610.142	11.3292	0.755615	14.9933	8.11977e-51	1.84443e-50
ALG9	603.427	2.72045	0.154434	17.6156	1.86936e-69	5.6763e-69
ALG9-IT1	32.7779	-3.90253	0.254563	-15.3303	4.79877e-53	1.12857e-52
ALK	1008.59	9.90342	0.761668	13.0023	1.18743e-38	2.30024e-38
ALKBH2	419.868	7.76251	0.439113	17.6777	6.22813e-70	1.90591e-69
ALKBH3	643.188	5.02224	0.177721	28.2591	1.09955e-175	7.66041e-175
ALKBH4	474.935	3.62966	0.181018	20.0514	1.96133e-89	7.55038e-89
ALKBH5	2919.43	6.27265	0.17253	36.3568	2.04871e-289	2.73574e-288
ALKBH6	202.582	-1.07927	0.182185	-5.92404	3.14132e-09	3.72989e-09
ALKBH7	594.869	-0.719237	0.193595	-3.71517	0.00020307	0.000224143
ALKBH8	568.97	1.02613	0.151394	6.77786	1.21966e-11	1.49923e-11
ALMS1	5416.74	8.04729	0.199754	40.286	0	0
ALMS1-IT1	85.0931	1.97042	0.289209	6.81312	9.55061e-12	1.1759e-11
ALMS1P	97.1939	-0.96015	0.267456	-3.58994	0.000330757	0.000363661
ALOX12	490.313	-10.276	0.305479	-33.639	4.51722e-248	4.73381e-247
ALOX12-AS1	1209.61	-3.61631	0.1387	-26.0729	7.40243e-150	4.39549e-149
ALOX15B	560.021	-4.3299	0.596894	-7.25405	4.04493e-13	5.08259e-13
ALOX15P2	748.164	-14.2147	0.332723	-42.7223	0	0
ALOX5AP	1334.24	6.43512	0.410589	15.6729	2.31784e-55	5.64652e-55
ALOXE3	126.191	-6.81063	0.441779	-15.4164	1.27041e-53	3.01144e-53
ALPI	108.04	-11.4794	0.42412	-27.0663	2.45553e-161	1.57241e-160
ALPK1	1188.95	5.97172	0.354045	16.8671	7.8556e-64	2.18962e-63
ALPK2	451.405	7.40456	0.779997	9.49307	2.24324e-21	3.28167e-21
ALPK3	1272.58	11.6683	0.810771	14.3916	5.84521e-47	1.26181e-46
ALPL	306.657	0.928825	0.312339	2.97377	0.00294166	0.00317717
ALPP	303.483	-12.0054	0.320664	-37.4392	8.99441e-307	1.33384e-305
ALS2	3253.65	-0.950661	0.088477	-10.7447	6.27496e-27	1.02496e-26
ALS2CL	281.317	10.2123	0.824401	12.3875	3.05258e-35	5.64824e-35
ALS2CR11	221.009	-4.40585	0.595223	-7.40201	1.34138e-13	1.69954e-13
ALS2CR12	264.233	2.36716	0.216798	10.9187	9.38004e-28	1.55632e-27
ALX1	94.5977	-7.15199	0.815576	-8.76925	1.79858e-18	2.47968e-18
ALX3	107.961	-2.49478	0.544252	-4.58388	4.56434e-06	5.17932e-06
ALX4	137.009	-3.377	0.703313	-4.80156	1.57436e-06	1.79727e-06
ALYREF	2071.57	-2.80292	0.145085	-19.3191	3.70806e-83	1.34273e-82
AMACR	642.214	-4.23444	0.1944	-21.7821	3.43176e-105	1.50135e-104
AMBP	294.204	-10.3173	0.664888	-15.5174	2.64723e-54	6.3374e-54
AMBRA1	3076.48	-1.60733	0.110461	-14.5511	5.74539e-48	1.25531e-47
AMD1	3305.02	13.4059	0.759599	17.6487	1.04201e-69	3.17874e-69
AMD1P1	71.8851	-5.3433	0.311451	-17.1562	5.65285e-66	1.63097e-65
AMDHD1	125.781	-4.05383	0.353529	-11.4668	1.93801e-30	3.35194e-30
AMDHD2	1986.04	-2.8605	0.164043	-17.4376	4.28004e-68	1.27259e-67
AMDP1	298.575	-12.6532	0.313389	-40.3752	0	0
AMELY	45.9006	-10.9538	1.09131	-10.0373	1.04523e-23	1.60527e-23
AMER1	1260.28	-2.63029	0.170284	-15.4465	7.96692e-54	1.89364e-53
AMER2	3700.3	2.99983	0.405145	7.40434	1.31803e-13	1.67028e-13
AMER3	563.532	-5.57553	0.769721	-7.24357	4.37013e-13	5.48886e-13
AMFR	6782.6	0.411999	0.141095	2.92001	0.00350015	0.00377541
AMH	230.3	4.62125	0.520299	8.88192	6.57182e-19	9.13233e-19
AMHR2	164.527	-10.4242	0.295444	-35.2833	1.0586e-272	1.27037e-271
AMICA1	205.983	7.33529	0.720161	10.1856	2.29876e-24	3.57789e-24
AMIGO1	693.406	2.03608	0.247682	8.22053	2.02607e-16	2.69021e-16
AMIGO2	689.115	-2.42221	0.430361	-5.62831	1.81979e-08	2.1374e-08
AMMECR1	342.14	6.60189	0.343668	19.2101	3.04618e-82	1.09253e-81
AMMECR1-IT1	45.036	-5.11381	0.290436	-17.6073	2.16385e-69	6.56446e-69
AMMECR1L	1222.92	5.59137	0.141877	39.4099	0	0
AMN1	373.472	-1.31941	0.166025	-7.94707	1.90977e-15	2.49694e-15
AMOT	1990.94	8.75796	0.459507	19.0595	5.48233e-81	1.9359e-80
AMOTL1	4257.37	4.52018	0.188051	24.0369	1.14308e-127	5.84498e-127
AMOTL2	1594.21	-0.497112	0.234118	-2.12334	0.0337256	0.0355666
AMPD1	538.049	-10.2194	0.502991	-20.3174	9.03186e-92	3.54228e-91
AMPD2	4566.72	-2.61219	0.122422	-21.3376	5.08917e-101	2.15544e-100
AMPH	599.489	6.0315	0.442828	13.6204	3.02855e-42	6.14001e-42
AMT	669.47	-2.04587	0.208636	-9.80596	1.06138e-22	1.59814e-22
AMY1A	330.94	-12.6835	0.345432	-36.7179	3.784e-295	5.2337e-294
AMY1B	519.566	-13.2173	0.452645	-29.2002	1.93058e-187	1.44494e-186
AMY2A	270.06	-8.01828	0.870814	-9.20781	3.32857e-20	4.75642e-20
AMY2B	664.89	11.0923	0.760056	14.5941	3.06221e-48	6.71964e-48
AMZ2	2162.63	-0.799604	0.163934	-4.87759	1.0739e-06	1.22851e-06
AMZ2P1	792.609	-2.17364	0.156347	-13.9027	6.10122e-44	1.26684e-43
AMZ2P2	792.497	-14.7691	0.323158	-45.7024	0	0
ANAPC10	425.959	1.89855	0.167922	11.3062	1.22335e-29	2.09289e-29
ANAPC11	1271.31	-1.00079	0.156425	-6.39793	1.57501e-10	1.9039e-10
ANAPC13	771.047	3.03261	0.502123	6.03957	1.54528e-09	1.84363e-09
ANAPC15	917.311	-3.38144	0.134935	-25.0598	1.36563e-138	7.51814e-138
ANAPC16	1048.57	9.10973	0.435187	20.9329	2.68644e-97	1.10263e-96
ANAPC1P1	147.28	-6.82218	0.272473	-25.038	2.35824e-138	1.29555e-137
ANAPC2	1352.43	10.0531	0.523219	19.214	2.82852e-82	1.01488e-81
ANAPC4	1403.3	12.5309	0.730024	17.165	4.85354e-66	1.40143e-65
ANAPC5	5072.23	13.6632	0.727628	18.7777	1.14864e-78	3.9484e-78
ANAPC7	1599.38	4.42286	0.130416	33.9136	4.20094e-252	4.51944e-251
ANG	99.1764	2.76654	0.307233	9.0047	2.16252e-19	3.03556e-19
ANGEL1	2060.01	-0.767831	0.175475	-4.37573	1.21024e-05	1.36371e-05
ANGEL2	1764.15	4.37053	0.145055	30.1301	1.95354e-199	1.54852e-198
ANGPT1	785.079	-2.2775	0.440357	-5.17195	2.31669e-07	2.6763e-07
ANGPT2	2281.99	2.35937	0.331965	7.10729	1.18341e-12	1.47655e-12
ANGPTL1	189.748	6.13829	0.722989	8.49015	2.06368e-17	2.7893e-17
ANGPTL2	1367.45	1.39924	0.230337	6.07477	1.24162e-09	1.48323e-09
ANGPTL4	3470.64	-1.59694	0.515079	-3.10037	0.00193278	0.0020944
ANGPTL6	149.758	-3.681	0.356805	-10.3165	5.93205e-25	9.34744e-25
ANGPTL7	4.14501	3.02558	1.01956	2.96755	0.00300188	0.00324168
ANK1	322.038	2.54854	0.423075	6.02385	1.70319e-09	2.02973e-09
ANK2	16083.2	8.1729	0.221397	36.9151	2.64461e-298	3.73642e-297
ANK3	1975.89	2.00799	0.422714	4.75025	2.03169e-06	2.31694e-06
ANKAR	666.106	-0.599631	0.154103	-3.8911	9.97889e-05	0.000110772
ANKDD1A	921.792	-2.3574	0.176789	-13.3345	1.4582e-40	2.89537e-40
ANKDD1B	2254.78	-7.12699	0.270624	-26.3354	7.54307e-153	4.5635e-152
ANKEF1	896.668	-5.00244	0.421132	-11.8786	1.52962e-32	2.72667e-32
ANKFN1	787.524	6.57991	0.39831	16.5196	2.65307e-61	7.09563e-61
ANKFY1	6549.94	7.7259	0.173299	44.5812	0	0
ANKH	2403.1	8.44629	0.356912	23.6649	8.29585e-124	4.12408e-123
ANKHD1	598.194	1.13979	0.12894	8.83971	9.59705e-19	1.32948e-18
ANKHD1-EIF4EBP3	172.162	4.04272	0.235072	17.1978	2.75979e-66	8.00564e-66
ANKIB1	5464.12	13.4104	0.725827	18.4761	3.2182e-76	1.07001e-75
ANKK1	71.1314	-2.34315	0.472418	-4.9599	7.05283e-07	8.08934e-07
ANKLE1	64.8589	-0.603246	0.246205	-2.45017	0.0142787	0.0151879
ANKLE2	2891.66	10.0628	0.370071	27.1916	8.16018e-163	5.27423e-162
ANKMY1	789.874	3.27557	0.168955	19.3873	9.88335e-84	3.59423e-83
ANKMY2	1057.07	8.17177	0.342475	23.861	7.79395e-126	3.93786e-125
ANKRA2	648.854	7.98452	0.380773	20.9692	1.25339e-97	5.15653e-97
ANKRD1	25.8886	5.28434	0.928709	5.68999	1.27048e-08	1.49622e-08
ANKRD10	6212.23	7.59379	0.214329	35.4305	5.79781e-275	7.03145e-274
ANKRD10-IT1	432.974	10.8342	0.760152	14.2526	4.31876e-46	9.2282e-46
ANKRD11	3216.59	4.91804	0.164012	29.9858	1.50313e-197	1.18152e-196
ANKRD12	3505.78	4.40245	0.167315	26.3123	1.38526e-152	8.36728e-152
ANKRD13A	1701.4	12.8087	0.729975	17.5468	6.29591e-69	1.89729e-68
ANKRD13B	453.871	10.9023	0.770207	14.155	1.73927e-45	3.68676e-45
ANKRD13C	1245.52	7.89522	0.264883	29.8065	3.22161e-195	2.50239e-194
ANKRD13D	1148.01	11.8804	0.735781	16.1466	1.20007e-58	3.08109e-58
ANKRD16	203.093	9.38099	0.746717	12.563	3.37328e-36	6.32623e-36
ANKRD17	8229.88	15.0828	0.727246	20.7396	1.52216e-95	6.17151e-95
ANKRD18A	81.0485	2.7784	0.659408	4.21348	2.51465e-05	2.81808e-05
ANKRD18CP	148.541	4.70413	0.512451	9.17966	4.32435e-20	6.16763e-20
ANKRD20A1	92.8598	1.87262	0.520451	3.59808	0.000320578	0.000352647
ANKRD20A11P	52.2152	6.29032	0.935946	6.72082	1.80709e-11	2.21613e-11
ANKRD20A2	27.0049	5.44798	0.912751	5.96875	2.39082e-09	2.84339e-09
ANKRD20A4	90.7563	3.26031	0.590105	5.52497	3.29538e-08	3.85468e-08
ANKRD20A7P	66.6071	5.59227	0.973559	5.74416	9.23792e-09	1.08984e-08
ANKRD22	102.735	4.04217	0.453656	8.91021	5.09344e-19	7.09444e-19
ANKRD23	121.275	5.19977	0.369868	14.0584	6.8382e-45	1.44022e-44
ANKRD24	245.588	3.69087	0.293548	12.5733	2.95991e-36	5.55813e-36
ANKRD26	1054.52	12.1185	0.73894	16.3998	1.91716e-60	5.06408e-60
ANKRD26P4	39.0986	7.36553	0.805327	9.14601	5.9073e-20	8.39843e-20
ANKRD27	1223.07	11.9717	0.731721	16.3611	3.62757e-60	9.54464e-60
ANKRD28	3407.85	8.3691	0.266922	31.3541	8.56076e-216	7.46066e-215
ANKRD29	124.026	3.53995	0.477417	7.41479	1.21821e-13	1.54475e-13
ANKRD30BL	17.4389	5.83777	1.11313	5.24448	1.56728e-07	1.81559e-07
ANKRD30BP2	55.258	-6.09264	1.64497	-3.70379	0.000212401	0.000234355
ANKRD31	32.6565	5.68687	0.832566	6.83053	8.46042e-12	1.04242e-11
ANKRD32	577.003	9.81096	0.724148	13.5483	8.11157e-42	1.63494e-41
ANKRD33B	466.107	1.08383	0.361724	2.99629	0.00273286	0.00295359
ANKRD34A	58.2652	7.57837	0.761911	9.94652	2.61163e-23	3.98465e-23
ANKRD35	258.806	6.49362	0.513434	12.6474	1.15589e-36	2.18301e-36
ANKRD36	3126.47	10.4689	0.415387	25.2027	3.74323e-140	2.08254e-139
ANKRD36B	1588.21	10.7052	0.633961	16.8862	5.68333e-64	1.587e-63
ANKRD36BP2	57.2962	2.42987	0.547657	4.43685	9.12841e-06	1.03147e-05
ANKRD36C	3551.69	9.55877	0.305238	31.3158	2.84221e-215	2.47042e-214
ANKRD37	214.459	9.09883	0.782772	11.6239	3.11747e-31	5.45397e-31
ANKRD39	256.678	10.0799	0.730513	13.7984	2.60406e-43	5.35999e-43
ANKRD40	2751.5	13.5022	0.731435	18.4598	4.34705e-76	1.44169e-75
ANKRD42	685.639	11.4976	0.737883	15.5819	9.66841e-55	2.32922e-54
ANKRD44	1892.83	11.8806	0.733511	16.1968	5.30963e-59	1.37003e-58
ANKRD44-IT1	160.428	9.40158	0.740349	12.6988	6.00088e-37	1.13733e-36
ANKRD45	221.09	9.86475	0.825392	11.9516	6.36901e-33	1.14245e-32
ANKRD46	755.87	4.49353	0.205839	21.8303	1.19571e-105	5.24854e-105
ANKRD49	306.134	9.25249	0.726849	12.7296	4.04988e-37	7.6939e-37
ANKRD50	2200.53	10.0479	0.427935	23.48	6.52429e-122	3.19626e-121
ANKRD52	3031.3	13.6419	0.740018	18.4345	6.94621e-76	2.29876e-75
ANKRD53	56.4504	5.3078	0.649823	8.16806	3.13391e-16	4.14758e-16
ANKRD54	695.377	3.19917	0.211754	15.108	1.43428e-51	3.29532e-51
ANKRD6	1301.95	5.67308	0.288586	19.6582	4.91772e-86	1.83069e-85
ANKRD65	195.962	8.24036	0.834871	9.87022	5.6043e-23	8.49107e-23
ANKRD7	45.4521	7.58373	0.836085	9.07053	1.18442e-19	1.67223e-19
ANKRD9	633.449	11.3833	0.749926	15.1792	4.85818e-52	1.12493e-51
ANKS1A	1548.05	12.6723	0.735238	17.2357	1.43319e-66	4.1763e-66
ANKS1B	854.311	11.4541	0.841291	13.6148	3.2683e-42	6.62044e-42
ANKS3	948.706	11.9659	0.728466	16.4262	1.2421e-60	3.28856e-60
ANKS6	1038.43	12.0964	0.749629	16.1365	1.41298e-58	3.62278e-58
ANKUB1	115.039	5.94791	0.963675	6.17211	6.73854e-10	8.08177e-10
ANKZF1	1415.72	12.5435	0.737346	17.0117	6.72828e-65	1.90879e-64
ANLN	2097.87	4.4571	0.274613	16.2305	3.07163e-59	7.95297e-59
ANO1	135.005	5.60018	0.509411	10.9934	4.10919e-28	6.86991e-28
ANO10	914.481	2.58074	0.148403	17.3901	9.80841e-68	2.90485e-67
ANO2	202.544	9.73775	0.761796	12.7826	2.0505e-37	3.90906e-37
ANO3	74.8187	4.3343	0.552713	7.84186	4.43915e-15	5.76844e-15
ANO4	190.327	9.64819	0.881768	10.9419	7.26867e-28	1.2089e-27
ANO5	419.066	10.4264	0.876124	11.9006	1.17485e-32	2.09838e-32
ANO6	5348.49	11.7173	0.493847	23.7266	1.91619e-124	9.58205e-124
ANO7P1	23.2743	2.81873	0.405269	6.9552	3.52067e-12	4.36111e-12
ANO8	1317.33	12.4395	0.76138	16.3382	5.28314e-60	1.38577e-59
ANP32A	2642.71	13.4439	0.730836	18.3953	1.43367e-75	4.72196e-75
ANP32B	881.891	11.8606	0.742147	15.9815	1.71919e-57	4.32975e-57
ANP32C	30.9685	-1.41297	0.600043	-2.35478	0.0185336	0.0196644
ANP32E	1438.74	10.3454	0.57773	17.907	1.03977e-71	3.26394e-71
ANPEP	471.349	10.9568	0.896508	12.2216	2.38211e-34	4.35768e-34
ANTXR1	3884.21	13.9996	0.758141	18.4657	3.90217e-76	1.29561e-75
ANTXR2	1270.99	12.3879	0.786091	15.7589	5.9657e-56	1.46608e-55
ANXA1	9226.41	8.64862	0.303614	28.4856	1.76553e-178	1.25293e-177
ANXA11	1607.12	3.27181	0.218769	14.9555	1.43358e-50	3.24241e-50
ANXA2	10782.4	15.4726	0.788117	19.6323	8.1906e-86	3.04389e-85
ANXA2P2	29.4861	6.95791	0.815873	8.52818	1.48668e-17	2.0145e-17
ANXA2R	185.242	8.88795	0.765966	11.6036	3.95195e-31	6.90125e-31
ANXA3	36.0952	0.928927	0.411886	2.2553	0.0241146	0.0255221
ANXA4	852.734	5.98856	0.243857	24.5577	3.57832e-133	1.89878e-132
ANXA5	11730.7	7.60183	0.20718	36.6918	9.85541e-295	1.35954e-293
ANXA6	5051.84	10.3314	0.333718	30.9583	1.96307e-210	1.66125e-209
ANXA7	1719.91	7.34488	0.239944	30.6108	8.80231e-206	7.26654e-205
AOAH	606.673	10.9602	0.813551	13.472	2.28599e-41	4.5826e-41
AOAH-IT1	37.4708	-2.19555	0.417952	-5.25311	1.49552e-07	1.73262e-07
AOC3	72.1554	2.60709	0.368435	7.07611	1.48262e-12	1.84734e-12
AOX1	170.442	7.10872	0.66427	10.7016	1.00088e-26	1.62756e-26
AP000223.42	58.4938	-0.467554	0.219939	-2.12583	0.0335171	0.0353496
AP000253.1	41.2257	5.68163	0.694057	8.18611	2.69814e-16	3.57536e-16
AP000254.8	36.3505	3.72097	0.414813	8.97024	2.95879e-19	4.14202e-19
AP000266.7	67.3969	7.06663	0.750615	9.41445	4.7555e-21	6.91266e-21
AP000347.2	197.572	9.70203	0.74041	13.1036	3.14033e-39	6.13074e-39
AP000350.5	155.4	9.35598	0.970281	9.64255	5.28597e-22	7.827e-22
AP000431.2	40.402	-10.3538	0.908387	-11.398	4.27781e-30	7.35862e-30
AP000432.1	60.2759	7.98911	0.77432	10.3176	5.86796e-25	9.24756e-25
AP000437.3	51.4835	2.98492	0.274788	10.8626	1.73673e-27	2.86581e-27
AP000439.1	24.6531	6.69927	0.820492	8.16494	3.21597e-16	4.25575e-16
AP000473.5	185.364	4.66761	0.377354	12.3693	3.83097e-35	7.07904e-35
AP000473.8	264.392	10.1226	0.797476	12.6933	6.4454e-37	1.22131e-36
AP000476.1	73.3402	-1.43789	0.361359	-3.97912	6.91698e-05	7.69585e-05
AP000477.3	97.4102	-9.8225	0.258109	-38.0557	0	0
AP000487.5	58.0663	2.68165	0.276888	9.68497	3.49324e-22	5.19325e-22
AP000560.3	88.763	8.54826	0.794086	10.7649	5.04145e-27	8.24808e-27
AP000577.2	57.9054	7.93145	0.742701	10.6792	1.27375e-26	2.06656e-26
AP000641.1	59.3952	7.96801	0.978921	8.13958	3.96657e-16	5.2427e-16
AP000648.5	30.1293	1.84453	0.658262	2.80211	0.00507688	0.00545555
AP000654.4	44.7724	3.75688	0.487225	7.71077	1.25063e-14	1.61262e-14
AP000662.4	89.4067	8.55893	0.751985	11.3818	5.15399e-30	8.85653e-30
AP000688.29	60.4318	3.4571	0.545478	6.33773	2.33173e-10	2.81256e-10
AP000692.9	70.8358	8.22181	0.736401	11.1649	6.0588e-29	1.02552e-28
AP000695.6	24.1094	0.709142	0.357162	1.98549	0.0470897	0.0494876
AP000711.1	25.8914	6.77034	0.945066	7.16388	7.84225e-13	9.80673e-13
AP000783.1	26.982	6.82983	0.848678	8.04762	8.44225e-16	1.11042e-15
AP000857.2	45.3167	7.21721	0.771487	9.35494	8.36441e-21	1.20958e-20
AP000866.1	49.5446	7.70688	0.804528	9.57937	9.76353e-22	1.43809e-21
AP000892.6	339	6.51326	0.622301	10.4664	1.23229e-25	1.96403e-25
AP000936.1	64.383	8.08309	0.745341	10.8448	2.11043e-27	3.47657e-27
AP000962.1	258.969	10.0926	0.768444	13.1339	2.10664e-39	4.12433e-39
AP000997.3	23.1243	6.60834	0.860208	7.68227	1.56298e-14	2.01261e-14
AP001046.5	29.7826	6.97332	0.832117	8.38022	5.28287e-17	7.0941e-17
AP001062.7	122.141	9.00864	0.748648	12.0332	2.37743e-33	4.2903e-33
AP001271.3	37.6773	-6.6234	0.664083	-9.97376	1.98573e-23	3.03552e-23
AP001347.6	48.0009	2.14532	0.345327	6.21242	5.21748e-10	6.2655e-10
AP001350.4	86.1659	-2.57759	0.242784	-10.6168	2.49e-26	4.02247e-26
AP001372.2	190.336	0.796533	0.19138	4.16205	3.15397e-05	3.52822e-05
AP001429.1	138.362	9.18824	0.74463	12.3393	5.56183e-35	1.02565e-34
AP001432.14	220.111	-7.68565	0.304372	-25.2509	1.10788e-140	6.18856e-140
AP001434.2	949.437	-12.9476	0.579519	-22.342	1.44385e-110	6.54536e-110
AP001442.2	1171.55	-12.7653	0.245485	-52.0003	0	0
AP001453.1	525.634	-14.4712	1.45908	-9.91804	3.47503e-23	5.29031e-23
AP001462.6	753.999	-8.19329	0.111964	-73.1782	0	0
AP001465.5	385.197	-12.2418	2.27406	-5.38321	7.31694e-08	8.50994e-08
AP001468.58	343.717	-8.68798	0.459052	-18.9259	6.97531e-80	2.43303e-79
AP001469.7	39.7578	-4.01729	0.356383	-11.2724	1.79662e-29	3.06525e-29
AP001469.9	1270.3	-7.05325	0.163168	-43.2269	0	0
AP001471.1	1178.54	-11.3781	0.507498	-22.42	2.51218e-111	1.14397e-110
AP001476.2	3367.25	-14.0117	0.224602	-62.3848	0	0
AP001476.3	2591.21	-15.4221	0.458398	-33.6435	3.88719e-248	4.07682e-247
AP001476.4	315.515	-13.5582	0.427212	-31.7364	4.89174e-221	4.36735e-220
AP001482.1	366.812	-13.9522	1.3958	-9.99584	1.58942e-23	2.43436e-23
AP001505.10	1043.43	-8.29038	0.171989	-48.2029	0	0
AP001506.1	1244.82	-15.6563	0.317872	-49.2535	0	0
AP001524.1	293.823	-13.6321	1.39369	-9.78135	1.35395e-22	2.03426e-22
AP001525.1	851.276	-15.1668	1.42046	-10.6774	1.29906e-26	2.10697e-26
AP001537.1	364.107	-13.8238	0.380883	-36.2942	1.99848e-288	2.64582e-287
AP001595.1	359.833	-12.9228	0.306922	-42.1043	0	0
AP001596.6	253.924	-5.94229	0.427106	-13.9129	5.28862e-44	1.09924e-43
AP001604.1	201.176	-12.908	0.300641	-42.935	0	0
AP001604.3	98.7791	-9.72337	0.602078	-16.1497	1.14118e-58	2.93104e-58
AP001605.4	339.801	-13.4294	0.310277	-43.2821	0	0
AP001607.1	232.805	-13.2964	0.34086	-39.0085	0	0
AP001610.5	1085.89	-12.9528	0.53648	-24.144	8.62881e-129	4.44074e-128
AP001610.9	142.258	-12.5858	0.303302	-41.4961	0	0
AP001615.9	168.791	-12.7738	0.317189	-40.2718	0	0
AP001619.1	192.539	-8.89855	0.181815	-48.943	0	0
AP001619.2	1573.31	-8.46065	0.177463	-47.6757	0	0
AP001619.3	1898.3	-15.9705	0.318324	-50.1707	0	0
AP001625.4	81.2682	-7.78167	0.322618	-24.1204	1.52743e-128	7.84696e-128
AP001625.5	2232.43	-15.9099	0.360243	-44.1645	0	0
AP001625.6	58.9797	-11.0781	0.366702	-30.2101	1.74738e-200	1.39817e-199
AP001626.1	835.361	-11.9647	0.789008	-15.1642	6.10032e-52	1.41007e-51
AP001626.2	279.706	-5.0716	0.385702	-13.149	1.72403e-39	3.37754e-39
AP001627.1	5985.28	-11.8623	0.476609	-24.8889	9.81436e-137	5.33821e-136
AP001628.6	1708.65	-8.80581	0.215088	-40.9404	0	0
AP001628.7	277.039	-11.9217	0.433397	-27.5075	1.42714e-166	9.39975e-166
AP001631.9	418.506	-10.9923	0.558696	-19.6749	3.54128e-86	1.31941e-85
AP001634.6	271.363	-13.4586	0.367053	-36.6668	2.47519e-294	3.40378e-293
AP001786.1	50.6802	-8.62904	0.757673	-11.3889	4.75066e-30	8.16772e-30
AP001885.1	282.386	-13.5749	1.41186	-9.61489	6.91838e-22	1.02222e-21
AP001888.1	248.141	-13.0937	0.32485	-40.3069	0	0
AP001891.1	819.741	-10.1905	0.442665	-23.0207	2.8916e-117	1.36841e-116
AP001992.1	111.171	-8.53278	0.310296	-27.4988	1.81396e-166	1.19356e-165
AP002364.1	160.617	-12.6432	0.324844	-38.9207	0	0
AP002381.2	112.387	-11.004	0.399819	-27.5225	9.44672e-167	6.23294e-166
AP002414.1	129.259	-8.65127	0.714596	-12.1065	9.75515e-34	1.76976e-33
AP002490.1	2343.75	-13.0485	0.283305	-46.0582	0	0
AP002495.1	3516.8	-13.3282	0.245346	-54.324	0	0
AP002498.1	658.118	-10.3755	0.359351	-28.8729	2.61205e-183	1.90668e-182
AP002802.1	251.16	-12.1677	0.347271	-35.0382	5.90597e-269	6.95101e-268
AP002954.3	139.436	9.19857	0.749105	12.2794	1.16844e-34	2.14688e-34
AP003068.18	27.227	1.38049	0.305256	4.52241	6.11382e-06	6.92473e-06
AP003068.23	44.871	6.84261	0.761458	8.9862	2.55925e-19	3.5869e-19
AP003176.1	529.829	-10.8622	0.329164	-32.9993	8.30928e-239	8.2506e-238
AP003305.1	1273.6	-15.748	1.45247	-10.8422	2.17086e-27	3.57545e-27
AP003356.1	46.0574	-10.8996	1.02106	-10.6747	1.33683e-26	2.16784e-26
AP003385.1	664.711	-14.6922	0.320695	-45.8138	0	0
AP003385.2	77.2467	-11.7048	1.11921	-10.4581	1.34594e-25	2.14335e-25
AP003391.1	40.8854	-7.45641	0.585081	-12.7442	3.35721e-37	6.38442e-37
AP003419.16	271.507	-9.58952	0.396409	-24.191	2.76933e-129	1.42941e-128
AP003464.1	671.549	-10.86	0.422493	-25.7045	1.04059e-145	5.99215e-145
AP003471.2	143.54	-12.3628	0.397192	-31.1255	1.08799e-212	9.3181e-212
AP003498.1	288.849	-13.1949	0.302255	-43.6548	0	0
AP003774.4	51.7113	7.40658	0.790408	9.37058	7.2135e-21	1.0447e-20
AP003774.6	109.485	-7.19248	0.481704	-14.9313	2.06128e-50	4.65571e-50
AP003900.6	9103.97	-9.27413	2.52005	-3.68014	0.000233105	0.000257004
AP003972.1	966.474	-9.11456	0.671096	-13.5816	5.1489e-42	1.0401e-41
AP004242.1	998.837	-15.2797	0.337229	-45.3096	0	0
AP004289.1	428.297	-13.7042	0.309837	-44.2304	0	0
AP004289.2	85.8993	-11.4449	0.338795	-33.7812	3.71945e-250	3.94974e-249
AP004290.1	42.6149	-10.3724	0.316056	-32.8182	3.23817e-236	3.15923e-235
AP004371.1	193.649	-12.2641	0.313763	-39.0872	0	0
AP004372.1	217.995	-11.1723	0.454449	-24.5843	1.86067e-133	9.89335e-133
AP004782.1	47.0044	-4.84456	0.347065	-13.9587	2.78548e-44	5.80798e-44
AP005242.1	6903.43	-17.8331	0.432873	-41.1972	0	0
AP005271.1	107.832	-12.186	0.334218	-36.4612	4.5707e-291	6.16295e-290
AP006222.1	28.9589	-10.2894	1.24915	-8.23712	1.76408e-16	2.34483e-16
AP006261.1	766.406	-12.4402	0.413859	-30.0589	1.66843e-198	1.31577e-197
AP006285.2	80.0915	-4.38622	0.452359	-9.69632	3.1256e-22	4.65116e-22
AP006285.6	108.985	-12.1425	0.320355	-37.9032	0	0
AP006477.1	486.127	-14.1817	0.345655	-41.0284	0	0
AP006621.5	2255.15	-6.21686	0.205413	-30.2652	3.29139e-201	2.64974e-200
AP006621.6	184.169	-3.52423	0.239514	-14.714	5.23834e-49	1.1621e-48
AP006621.8	99.0971	-5.09254	0.342073	-14.8873	3.98588e-50	8.97035e-50
AP006621.9	860.833	-14.2993	0.35048	-40.7993	0	0
AP1AR	1079.12	-2.55429	0.166259	-15.3633	2.88426e-53	6.80142e-53
AP1B1	6903.02	-0.924962	0.219171	-4.22028	2.43998e-05	2.73568e-05
AP1G1	4492.68	14.2095	0.727546	19.5307	6.02046e-85	2.21983e-84
AP1G2	3038.36	-4.67581	0.192234	-24.3235	1.10608e-130	5.76912e-130
AP1S1	1114.74	8.97364	0.416981	21.5205	1.00088e-102	4.29509e-102
AP1S2	2312.47	13.2514	0.787333	16.8307	1.45347e-63	4.03761e-63
AP1S3	488.496	-4.91763	0.229546	-21.4233	8.1087e-102	3.45658e-101
AP2A1	3030.76	0.844385	0.127267	6.63477	3.25013e-11	3.96969e-11
AP2A2	3465.85	-0.384422	0.127505	-3.01494	0.00257026	0.00277947
AP2B1	9252.38	0.663009	0.13748	4.82258	1.41714e-06	1.61884e-06
AP2M1	8037.4	2.3657	0.142702	16.5779	1.00749e-61	2.71329e-61
AP2S1	2400.75	-2.38293	0.166681	-14.2964	2.30431e-46	4.93863e-46
AP3B1	4213.82	-2.06431	0.11153	-18.509	1.74691e-76	5.83331e-76
AP3D1	4881.56	1.14215	0.124305	9.18824	3.99339e-20	5.70022e-20
AP3M1	1668.74	-0.484874	0.125635	-3.8594	0.000113666	0.000126017
AP3M2	1400.56	5.9741	0.18671	31.9967	1.21157e-224	1.10342e-223
AP3S1	858.626	0.580478	0.176771	3.28379	0.0010242	0.00111597
AP3S2	1119.36	10.1938	0.600809	16.9667	1.44821e-64	4.08472e-64
AP4B1	893.216	11.5182	0.72701	15.8432	1.56551e-56	3.87954e-56
AP4E1	1741.87	-2.64382	0.127974	-20.659	8.09641e-95	3.26602e-94
AP4M1	1310.08	-1.42673	0.11058	-12.9023	4.36811e-38	8.40412e-38
AP4S1	680.915	-1.61979	0.210408	-7.69834	1.37846e-14	1.77614e-14
AP5B1	830.27	2.35585	0.138593	16.9984	8.43808e-65	2.38767e-64
AP5M1	1752.71	4.18571	0.200195	20.9082	4.50715e-97	1.84762e-96
AP5S1	1614.85	-2.59593	0.131799	-19.6962	2.32622e-86	8.68796e-86
AP5Z1	1514.57	3.75243	0.156399	23.9927	3.31786e-127	1.69162e-126
APBA1	1247.19	1.40587	0.252565	5.56639	2.60075e-08	3.04717e-08
APBA2	4253.51	3.11799	0.243632	12.7979	1.6838e-37	3.21395e-37
APBA3	669.487	1.16062	0.189712	6.11779	9.48815e-10	1.13515e-09
APBB1IP	5615.36	-5.02506	0.327573	-15.3403	4.11533e-53	9.68965e-53
APBB2	2996.81	1.94687	0.228821	8.50826	1.76564e-17	2.38905e-17
APBB3	1275.64	5.24745	0.163095	32.1742	4.04881e-227	3.74579e-226
APC	13362.6	1.28823	0.185747	6.93537	4.05146e-12	5.01435e-12
APC2	6474.64	10.15	0.38321	26.4866	1.38119e-154	8.46916e-154
APCDD1	1419.5	0.933864	0.24857	3.75695	0.000172	0.000190128
APCDD1L	153.311	-1.64405	0.829764	-1.98135	0.0475519	0.0499633
APCDD1L-AS1	2697.34	-6.90279	0.456145	-15.1329	9.83134e-52	2.26532e-51
APEH	2344.43	4.40072	0.163201	26.965	3.80095e-160	2.4099e-159
APELA	115.872	-10.6568	0.860779	-12.3804	3.33679e-35	6.17151e-35
APEX1	1955.69	2.45619	0.159527	15.3967	1.72167e-53	4.07452e-53
APEX2	1063.25	-2.89721	0.147759	-19.6077	1.33006e-85	4.93109e-85
APH1A	3521.18	4.47946	0.137635	32.5458	2.40142e-232	2.29685e-231
APH1B	1616.72	-1.20252	0.155958	-7.71056	1.25265e-14	1.61506e-14
API5	2585.46	8.85541	0.268197	33.0183	4.43877e-239	4.41075e-238
API5P1	4107.66	-13.4817	0.157481	-85.6087	0	0
API5P2	274.196	-10.5722	0.360991	-29.2866	1.53607e-188	1.15427e-187
APIP	3782.38	-5.31723	0.121179	-43.879	0	0
APITD1	45.9154	-0.870392	0.192616	-4.51879	6.21949e-06	7.04381e-06
APITD1-CORT	342.854	-7.67149	0.193539	-39.638	0	0
APLN	3033.72	9.61345	0.494428	19.4436	3.30334e-84	1.20715e-83
APLNR	3123.86	1.80443	0.518444	3.48048	0.000500524	0.000548459
APLP1	2535.31	8.78819	0.393842	22.314	2.70034e-110	1.22203e-109
APLP2	17591.7	10.1145	0.252999	39.9786	0	0
APMAP	3519.04	13.8571	0.736352	18.8186	5.31772e-79	1.83537e-78
APOA1BP	2104.72	-1.86637	0.157104	-11.8798	1.50769e-32	2.68793e-32
APOA2	4320.24	-16.7447	0.315272	-53.112	0	0
APOA4	39.1163	-8.42361	1.05774	-7.96376	1.66883e-15	2.1841e-15
APOA5	41.1229	-9.15459	0.312529	-29.292	1.31221e-188	9.86617e-188
APOBEC1	57.8766	-10.8741	0.34258	-31.7419	4.11014e-221	3.67328e-220
APOBEC2	615.442	-14.1098	0.342006	-41.2559	0	0
APOBEC3A	109.389	-3.92117	0.637479	-6.15105	7.69717e-10	9.2218e-10
APOBEC3AP1	593.443	-14.5286	0.370974	-39.1635	0	0
APOBEC3B	281.929	-5.12788	0.375713	-13.6484	2.06339e-42	4.19134e-42
APOBEC3B-AS1	434.774	-13.8438	0.363821	-38.0512	0	0
APOBEC3C	885.542	-2.24844	0.275923	-8.14878	3.67616e-16	4.86155e-16
APOBEC3D	1582.69	-7.2121	0.279537	-25.8001	8.83757e-147	5.13516e-146
APOBEC3F	5473.81	-8.0692	0.186588	-43.2461	0	0
APOBEC3G	366.973	1.14176	0.277173	4.1193	3.8002e-05	4.24662e-05
APOBEC4	1213.56	-13.5566	0.957272	-14.1617	1.58026e-45	3.3508e-45
APOBR	259.686	-0.712199	0.320858	-2.21967	0.0264411	0.0279585
APOC1	1910.27	5.35079	0.397647	13.4561	2.83362e-41	5.67435e-41
APOC2	1147.06	-7.37495	0.396446	-18.6027	3.05705e-77	1.03249e-76
APOC3	793.699	-14.6534	0.328161	-44.6532	0	0
APOC4	343.025	-13.0893	0.370608	-35.3185	3.05907e-273	3.68616e-272
APOC4-APOC2	125.039	-5.54269	0.389685	-14.2235	6.54647e-46	1.39588e-45
APOE	26190	2.44621	0.296039	8.26312	1.41914e-16	1.88977e-16
APOF	77.8419	-11.0055	0.343258	-32.0619	1.49664e-225	1.37207e-224
APOL1	467.763	8.37381	0.634016	13.2076	7.93522e-40	1.56203e-39
APOL2	3083.79	0.80775	0.276116	2.9254	0.00344013	0.0037122
APOL3	450.46	8.68386	0.608833	14.2631	3.7147e-46	7.94393e-46
APOL4	644.766	11.4088	0.902931	12.6353	1.34919e-36	2.54552e-36
APOL6	3054.26	13.6528	0.769136	17.7508	1.69991e-70	5.24721e-70
APOLD1	3772.38	-2.2019	0.266445	-8.26398	1.40889e-16	1.87622e-16
APOM	316.417	-4.89439	0.215091	-22.755	1.28088e-114	5.9502e-114
APOO	405.156	4.60622	0.199235	23.1196	2.9442e-118	1.40493e-117
APOOL	1074.98	-2.10847	0.149872	-14.0685	5.93526e-45	1.25145e-44
APOOP1	1889.17	-16.3169	1.38937	-11.7441	7.57609e-32	1.3369e-31
APOOP5	2581.14	-15.0793	0.427512	-35.2722	1.56851e-272	1.87971e-271
APOPT1	456.542	3.32806	0.208612	15.9533	2.70083e-57	6.77474e-57
APP	30419.8	2.55586	0.186267	13.7215	7.55049e-43	1.54338e-42
APPBP2	3526.98	-1.25957	0.136681	-9.21542	3.10068e-20	4.43318e-20
APPL2	2663.67	2.98402	0.138901	21.4831	2.24197e-102	9.59596e-102
APRT	881.842	1.88278	0.222616	8.45752	2.73112e-17	3.68442e-17
APTR	255.833	2.50554	0.180771	13.8603	1.10242e-43	2.28145e-43
APTX	1401.72	-2.06888	0.163036	-12.6897	6.74591e-37	1.2777e-36
AQP1	15885.7	1.63039	0.492063	3.31336	0.000921808	0.00100515
AQP10	105.028	-9.34082	0.286668	-32.584	6.90264e-233	6.62376e-232
AQP11	1016.09	-6.09854	0.158272	-38.532	0	0
AQP12A	1295.34	-15.7136	0.310769	-50.5637	0	0
AQP12B	697.7	-14.5852	0.313711	-46.4924	0	0
AQP3	39.5501	5.17922	0.670697	7.72214	1.14389e-14	1.47592e-14
AQP4	35566.1	3.12603	0.372019	8.40289	4.35607e-17	5.85943e-17
AQP4-AS1	804.195	-3.42394	0.423305	-8.08859	6.03579e-16	7.95164e-16
AQP5	72.9401	1.9444	0.519242	3.74469	0.000180618	0.00019957
AQP6	80.8471	8.41401	0.778168	10.8126	3.00106e-27	4.92921e-27
AQP7	103.136	-7.9996	0.511591	-15.6367	4.09327e-55	9.92295e-55
AQP7P1	77.3468	8.34942	1.00867	8.27768	1.25595e-16	1.67501e-16
AQP7P2	327.651	-7.63244	0.855886	-8.91759	4.76526e-19	6.64402e-19
AQP7P4	174.129	-12.1693	0.377101	-32.2706	1.80816e-228	1.68948e-227
AQP8	141.03	-7.58695	0.319979	-23.7108	2.79034e-124	1.39242e-123
AQP9	433.971	1.78476	0.593691	3.00622	0.00264521	0.00285979
AQR	3302.54	1.39623	0.129131	10.8125	3.005e-27	4.93506e-27
AR	1582.33	-0.844299	0.366668	-2.30262	0.0213	0.0225723
ARAF	1130.7	12.2192	0.729801	16.7432	6.34859e-63	1.74734e-62
ARAP1	3423.63	13.4568	0.751279	17.9118	9.53621e-72	2.996e-71
ARAP2	6032.32	14.6347	0.759224	19.2758	8.57524e-83	3.09328e-82
ARAP3	1590.22	7.11871	0.363588	19.5791	2.33227e-85	8.63088e-85
ARC	1354.51	10.7434	0.767874	13.9911	1.76705e-44	3.69647e-44
ARCN1	4323.97	0.633269	0.10829	5.84791	4.97775e-09	5.89443e-09
AREG	326.7	-4.75672	0.521121	-9.12787	6.9863e-20	9.91423e-20
AREL1	2554.7	-0.833767	0.144713	-5.76153	8.3356e-09	9.84007e-09
ARF1	5687.63	4.04783	0.143244	28.2583	1.12461e-175	7.83084e-175
ARF1P2	559.453	-5.7732	0.149738	-38.5553	0	0
ARF3	3971.28	7.40033	0.223561	33.1021	2.77608e-240	2.78381e-239
ARF4	2686.59	8.85635	0.289126	30.6315	4.66682e-206	3.8635e-205
ARF4P2	363.653	-11.1529	0.394568	-28.266	9.04062e-176	6.3035e-175
ARF4P4	192.674	-8.50642	0.360071	-23.6243	2.17011e-123	1.07658e-122
ARF5	4086.48	-3.33138	0.14416	-23.1089	3.7645e-118	1.79474e-117
ARF6	1474.9	12.6026	0.743162	16.958	1.67859e-64	4.72995e-64
ARFGAP1	3371.71	10.4998	0.405979	25.8629	1.7414e-147	1.01612e-146
ARFGAP2	2815.54	7.28706	0.172796	42.1715	0	0
ARFGAP3	1740.71	4.55794	0.154874	29.43	2.27325e-190	1.72101e-189
ARFGEF1	5098.4	-0.619383	0.108226	-5.72307	1.04616e-08	1.23338e-08
ARFGEF2	4028.28	3.36794	0.110555	30.464	7.82091e-204	6.39413e-203
ARFIP1	1445.98	-1.0607	0.136833	-7.75178	9.06134e-15	1.17122e-14
ARFIP2	2640.73	-2.4242	0.114955	-21.0883	1.01804e-98	4.23065e-98
ARFRP1	1643.97	5.38933	0.164556	32.7507	2.96797e-235	2.87959e-234
ARG1	482.15	-8.09125	0.543683	-14.8823	4.29627e-50	9.66146e-50
ARG2	470.096	-2.93504	0.282239	-10.3991	2.50165e-25	3.96695e-25
ARGFXP2	261.771	-13.0529	0.312969	-41.7066	0	0
ARGLU1	4362.3	14.167	0.746027	18.99	2.06445e-80	7.24709e-80
ARHGAP1	2589.42	4.71215	0.163343	28.8482	5.33157e-183	3.88319e-182
ARHGAP10	842.738	3.50841	0.234677	14.95	1.5585e-50	3.52405e-50
ARHGAP11A	687.684	5.04779	0.282946	17.8401	3.44962e-71	1.07478e-70
ARHGAP11B	562.409	-0.655822	0.271587	-2.41478	0.0157448	0.0167284
ARHGAP12	2517.48	1.2828	0.154184	8.31993	8.80183e-17	1.1775e-16
ARHGAP17	1959.51	-1.32046	0.116575	-11.3271	9.63411e-30	1.65044e-29
ARHGAP18	1478.93	11.8851	0.761059	15.6165	5.61879e-55	1.35886e-54
ARHGAP19	972.558	-1.80339	0.313654	-5.74962	8.9443e-09	1.05544e-08
ARHGAP19-SLIT1	304.297	-5.08319	0.587761	-8.6484	5.22287e-18	7.13672e-18
ARHGAP20	1190.46	-1.91104	0.293839	-6.5037	7.83663e-11	9.51813e-11
ARHGAP21	12085	0.912621	0.193734	4.7107	2.46872e-06	2.81191e-06
ARHGAP22	521.89	5.26484	0.351469	14.9795	9.99171e-51	2.26632e-50
ARHGAP22-IT1	522.393	-7.13939	0.309395	-23.0753	8.19929e-118	3.90268e-117
ARHGAP23	1564.01	0.855235	0.208729	4.09735	4.1791e-05	4.66685e-05
ARHGAP23P1	37.4265	-8.57598	0.284041	-30.1928	2.94849e-200	2.3528e-199
ARHGAP24	840.457	10.7124	0.786547	13.6196	3.06271e-42	6.20878e-42
ARHGAP25	641.848	9.97031	0.741695	13.4426	3.40242e-41	6.80873e-41
ARHGAP26	4172.43	0.677006	0.205363	3.29663	0.00097852	0.00106663
ARHGAP26-AS1	4223.84	-16.7711	0.315583	-53.1432	0	0
ARHGAP26-IT1	509.016	-5.61373	0.226387	-24.7971	9.63299e-136	5.20296e-135
ARHGAP27	1151.1	-1.37589	0.266858	-5.1559	2.52416e-07	2.91496e-07
ARHGAP28	112.11	8.88486	0.875753	10.1454	3.47395e-24	5.38533e-24
ARHGAP30	964.723	1.16485	0.328621	3.54465	0.000393131	0.000431644
ARHGAP31-AS1	500.406	-6.94527	0.235487	-29.4932	3.51925e-191	2.67587e-190
ARHGAP32	3799.83	10.5676	0.409767	25.7892	1.17351e-146	6.81278e-146
ARHGAP33	523.076	6.95277	0.381148	18.2417	2.4096e-74	7.81975e-74
ARHGAP35	6231.47	10.03	0.280442	35.7651	3.84796e-280	4.83395e-279
ARHGAP36	386.893	-4.07211	0.707236	-5.75778	8.52249e-09	1.00589e-08
ARHGAP39	625.848	3.92609	0.239696	16.3795	2.68119e-60	7.06945e-60
ARHGAP4	1459.51	-1.12459	0.295046	-3.81156	0.000138091	0.000152826
ARHGAP40	274.159	-6.99971	0.501451	-13.9589	2.77688e-44	5.79051e-44
ARHGAP42P1	4005.77	-16.341	0.38081	-42.9113	0	0
ARHGAP42P2	1599.22	-13.4266	0.228081	-58.8677	0	0
ARHGAP42P5	1022.55	-15.4313	1.39172	-11.0879	1.43567e-28	2.41788e-28
ARHGAP44	455.832	-3.6802	0.404726	-9.09307	9.62794e-20	1.36181e-19
ARHGAP5	6717.65	2.97771	0.193393	15.3972	1.70841e-53	4.04385e-53
ARHGAP5-AS1	142.737	-2.54218	0.238968	-10.6382	1.97995e-26	3.20343e-26
ARHGAP6	679.664	-1.59676	0.319228	-5.00193	5.67587e-07	6.51827e-07
ARHGAP8	470.551	-7.43352	0.309562	-24.0131	2.03153e-127	1.03678e-126
ARHGAP9	401.54	3.09605	0.328327	9.42977	4.10973e-21	5.98356e-21
ARHGDIA	3017.08	0.694337	0.164288	4.22634	2.37528e-05	2.66382e-05
ARHGDIB	2272.93	7.73051	0.325989	23.714	2.58538e-124	1.29038e-123
ARHGDIG	285.891	-3.08306	0.500818	-6.15605	7.45812e-10	8.93867e-10
ARHGEF1	1820.65	0.639034	0.138981	4.59798	4.26599e-06	4.84287e-06
ARHGEF10	2472.57	2.03145	0.205881	9.86707	5.78275e-23	8.75992e-23
ARHGEF10L	2598.5	8.89406	0.329187	27.0183	9.01691e-161	5.74883e-160
ARHGEF11	3240.42	13.7381	0.73578	18.6715	8.44744e-78	2.87333e-77
ARHGEF12	12713.4	7.52309	0.142045	52.9626	0	0
ARHGEF15	106.797	8.81391	0.764256	11.5327	9.02957e-31	1.56937e-30
ARHGEF16	40.4834	-1.55232	0.380294	-4.08189	4.46713e-05	4.98638e-05
ARHGEF17	3211.59	7.72508	0.288966	26.7335	1.92083e-157	1.20134e-156
ARHGEF18	362.976	-1.72151	0.111233	-15.4766	4.98863e-54	1.18993e-53
ARHGEF19	107.637	6.58023	0.700308	9.3962	5.65697e-21	8.20718e-21
ARHGEF2	4799.18	3.77495	0.167721	22.5072	3.52506e-112	1.61387e-111
ARHGEF25	1038.1	1.17697	0.186001	6.32776	2.48751e-10	2.99923e-10
ARHGEF26	3637.94	9.23245	0.349638	26.4057	1.17741e-153	7.17111e-153
ARHGEF26-AS1	448.824	10.8861	0.784591	13.8749	8.99457e-44	1.86319e-43
ARHGEF28	508.937	11.0675	0.780219	14.1852	1.13223e-45	2.40699e-45
ARHGEF3	2479	1.8555	0.190172	9.75692	1.7231e-22	2.58224e-22
ARHGEF33	96.7294	5.42456	0.452115	11.9982	3.63115e-33	6.53931e-33
ARHGEF38	224.442	-8.81445	0.426797	-20.6526	9.25905e-95	3.73101e-94
ARHGEF38-IT1	63.5444	-11.3645	0.442227	-25.6983	1.22269e-145	7.03618e-145
ARHGEF39	79.7953	1.84905	0.313372	5.90048	3.62437e-09	4.29995e-09
ARHGEF3-AS1	711.061	-14.377	0.336001	-42.7887	0	0
ARHGEF4	4221.5	5.2902	0.316682	16.7051	1.20403e-62	3.29939e-62
ARHGEF40	4101.39	3.57171	0.191436	18.6574	1.09921e-77	3.73165e-77
ARHGEF5	983.137	-6.87491	0.55429	-12.4031	2.51402e-35	4.65566e-35
ARHGEF6	5363.1	5.6898	0.212973	26.716	3.06615e-157	1.91311e-156
ARHGEF7	5208.03	0.450366	0.187405	2.40317	0.0162537	0.0172628
ARHGEF7-AS1	253.322	-12.8876	0.392313	-32.8502	1.132e-236	1.10893e-235
ARHGEF7-AS2	644.263	-7.99019	0.485907	-16.4439	9.28109e-61	2.46294e-60
ARHGEF9	2071.07	9.57	0.392268	24.3966	1.858e-131	9.73736e-131
ARHGEF9-IT1	23.468	2.14752	0.3399	6.31808	2.64831e-10	3.19208e-10
ARID1A	4033.38	1.45746	0.184002	7.9209	2.35805e-15	3.07846e-15
ARID1B	3198.72	8.91609	0.281321	31.6937	1.90046e-220	1.6887e-219
ARID2	2831.01	13.1826	0.734846	17.9392	5.82603e-72	1.83679e-71
ARID3A	344.687	4.6719	0.26839	17.4072	7.28169e-68	2.15873e-67
ARID3B	286.985	0.672105	0.182716	3.67841	0.000234697	0.000258716
ARID4A	1405.28	7.05218	0.230208	30.634	4.32048e-206	3.57791e-205
ARID4B	2918.27	2.70186	0.112284	24.0627	6.13954e-128	3.14672e-127
ARID5A	1201.88	3.43294	0.268462	12.7875	1.92674e-37	3.67446e-37
ARID5B	2909.85	6.04824	0.202422	29.8793	3.6572e-196	2.85677e-195
ARIH1	4223.2	1.03446	0.109989	9.40511	5.19745e-21	7.54591e-21
ARIH2	3898.02	1.93426	0.117387	16.4776	5.31508e-61	1.4159e-60
ARIH2OS	352.714	-4.87685	0.147982	-32.9556	3.51317e-238	3.47916e-237
ARL1	1779.52	12.8735	0.732203	17.5818	3.39554e-69	1.02773e-68
ARL10	1908.79	0.64783	0.19926	3.25119	0.00114924	0.00125097
ARL11	270.377	-2.96718	0.325684	-9.11061	8.19166e-20	1.16072e-19
ARL13A	608.724	-14.2704	0.297888	-47.9052	0	0
ARL13B	800.357	0.838143	0.20014	4.18778	2.81697e-05	3.15325e-05
ARL14EP	796.354	11.7135	0.732602	15.9889	1.52825e-57	3.85404e-57
ARL15	329.04	4.92827	0.246427	19.9989	5.62444e-89	2.15605e-88
ARL16	766.045	-0.726617	0.129958	-5.59118	2.25536e-08	2.64461e-08
ARL17A	76.1326	3.3556	0.35023	9.58115	9.59737e-22	1.41385e-21
ARL17B	72.2937	-2.45506	0.390525	-6.28657	3.24559e-10	3.90788e-10
ARL2	568.413	4.0053	0.201212	19.9059	3.61897e-88	1.37724e-87
ARL2BP	5819.81	-3.71108	0.125451	-29.5819	2.55246e-192	1.9532e-191
ARL2BPP2	312.003	-13.7188	1.39796	-9.81343	9.85583e-23	1.48546e-22
ARL2BPP4	228.499	-13.2697	0.325234	-40.8003	0	0
ARL2BPP5	200.395	-13.0805	0.32429	-40.3358	0	0
ARL2BPP6	52.8994	-11.1585	1.08489	-10.2854	8.20249e-25	1.28772e-24
ARL2BPP7	58.4546	-11.3026	1.01575	-11.1274	9.23108e-29	1.55855e-28
ARL4A	1144.61	5.01417	0.306856	16.3405	5.08754e-60	1.335e-59
ARL4C	4431.52	9.44718	0.349755	27.0108	1.10317e-160	7.02996e-160
ARL4D	168.152	9.4699	0.792925	11.943	7.06368e-33	1.26611e-32
ARL4P	173.508	-12.4005	0.386382	-32.0939	5.35823e-226	4.92257e-225
ARL5A	2171.22	13.1605	0.736746	17.863	2.29081e-71	7.15434e-71
ARL5AP1	62.252	-11.3934	1.12775	-10.1028	5.36801e-24	8.28827e-24
ARL5AP3	255.821	-7.73846	0.303423	-25.5039	1.7842e-143	1.01256e-142
ARL5AP4	600.436	-12.8062	0.330728	-38.7213	0	0
ARL5B	1152.51	-1.59769	0.22707	-7.0361	1.97692e-12	2.45846e-12
ARL6	300.608	3.99733	0.236727	16.8858	5.72078e-64	1.59712e-63
ARL6IP1	5751.82	13.4841	0.73371	18.3779	1.97349e-75	6.48936e-75
ARL6IP1P2	284.953	-11.0811	0.406012	-27.2926	5.18645e-164	3.36959e-163
ARL6IP1P3	79.1934	-5.54602	0.438599	-12.6448	1.19455e-36	2.25521e-36
ARL6IP4	83.7088	0.628553	0.178255	3.52615	0.000421646	0.000462605
ARL6IP5	4340	-1.94244	0.155492	-12.4922	8.23401e-36	1.53598e-35
ARL6IP6	900.194	-1.49895	0.15385	-9.7429	1.97827e-22	2.9579e-22
ARL8A	1551.93	0.517442	0.129949	3.98187	6.83746e-05	7.60769e-05
ARL8B	2534.76	5.39082	0.172155	31.3137	3.03437e-215	2.63658e-214
ARMC1	1026.27	1.82982	0.132378	13.8227	1.85916e-43	3.83486e-43
ARMC10	1325.35	-0.298938	0.134552	-2.22173	0.0263014	0.027813
ARMC10P1	494.753	-10.7387	0.280158	-38.331	0	0
ARMC12	291.45	-4.69743	0.251157	-18.7032	4.66572e-78	1.59278e-77
ARMC2	447.422	8.01607	0.502215	15.9614	2.37246e-57	5.95846e-57
ARMC3	117.314	7.54033	1.20368	6.26441	3.7425e-10	4.50227e-10
ARMC4	83.6661	8.10208	0.96407	8.40404	4.31392e-17	5.80303e-17
ARMC4P1	26.2601	-1.90086	0.328516	-5.78619	7.20014e-09	8.50884e-09
ARMC5	422.929	10.8006	0.738051	14.6339	1.70682e-48	3.76077e-48
ARMC6	1013.24	10.3138	0.65535	15.7379	8.31609e-56	2.04045e-55
ARMC7	205.46	9.03786	0.729559	12.3881	3.03078e-35	5.60908e-35
ARMC8	2250.58	13.2123	0.729608	18.1087	2.71903e-73	8.69619e-73
ARMC9	1154.65	1.6112	0.143856	11.2001	4.0719e-29	6.9077e-29
ARMCX1	698.816	5.60883	0.182127	30.7964	2.93177e-208	2.44559e-207
ARMCX2	3795.97	-3.18666	0.179864	-17.717	3.09841e-70	9.52267e-70
ARMCX4	1317.98	0.719678	0.166914	4.31168	1.62021e-05	1.82184e-05
ARMCX5	1075.89	-3.21224	0.123792	-25.9487	1.87968e-148	1.10367e-147
ARMCX6	1038.93	-3.40732	0.132374	-25.7402	4.14864e-146	2.39736e-145
ARMCX7P	498.593	-11.3603	0.482045	-23.5669	8.41837e-123	4.15124e-122
ARNT	2773.54	-1.10662	0.122836	-9.00897	2.07999e-19	2.92112e-19
ARNT2	6780.32	2.12637	0.20761	10.2421	1.28397e-24	2.00926e-24
ARNTL	1959.3	-0.438152	0.183572	-2.38682	0.0169949	0.0180442
ARNTL2	1036.36	0.776453	0.277854	2.79447	0.00519856	0.00558585
ARNTL2-AS1	180.08	-12.7486	0.360662	-35.3478	1.08202e-273	1.30623e-272
ARPC1A	2602.44	5.00621	0.157029	31.8808	4.92602e-223	4.44322e-222
ARPC1B	1834.46	2.33274	0.278933	8.36307	6.1108e-17	8.19668e-17
ARPC2	4587.21	2.32076	0.139349	16.6542	2.81997e-62	7.67552e-62
ARPC3	5122.11	-2.48889	0.14693	-16.9393	2.31002e-64	6.48834e-64
ARPC3P1	784.67	-11.3764	0.217793	-52.2349	0	0
ARPC3P5	81.5527	-9.63543	0.255211	-37.7548	0	0
ARPC4	1869.08	12.9443	0.733909	17.6375	1.27021e-69	3.86996e-69
ARPC4-TTLL3	1022.62	-7.14644	0.177421	-40.2796	0	0
ARPC5	3299.98	3.97706	0.186799	21.2906	1.38852e-100	5.85071e-100
ARPC5L	1372.42	-2.7929	0.14564	-19.1767	5.78906e-82	2.07006e-81
ARPIN	1592.08	10.6998	0.599048	17.8614	2.35628e-71	7.35704e-71
ARPP19	6395.81	13.6373	0.730078	18.6793	7.29818e-78	2.48499e-77
ARPP21	546.505	3.29325	0.450316	7.3132	2.60854e-13	3.2892e-13
ARR3	43.7355	-9.81632	0.425862	-23.0505	1.45434e-117	6.90856e-117
ARRB1	1404.08	-2.51514	0.253328	-9.9284	3.13241e-23	4.77397e-23
ARRDC1	645.01	-1.68839	0.161757	-10.4378	1.6657e-25	2.64837e-25
ARRDC1-AS1	1321.1	-3.69227	0.112554	-32.8044	5.09746e-236	4.96214e-235
ARRDC3	5681.6	3.21973	0.261174	12.3279	6.40582e-35	1.18038e-34
ARRDC3-AS1	190.088	-3.82524	0.177639	-21.5338	7.51464e-103	3.229e-102
ARRDC4	2593.14	13.4166	0.798606	16.8001	2.43726e-63	6.74487e-63
ARRDC5	28.1634	2.14428	0.476523	4.49985	6.80016e-06	7.6958e-06
ARSA	1243.4	-1.65824	0.202677	-8.18166	2.79949e-16	3.70816e-16
ARSB	1090.5	12.1669	0.739077	16.4623	6.84776e-61	1.82069e-60
ARSD	2455.71	-1.69894	0.231595	-7.33584	2.20329e-13	2.78114e-13
ARSD-AS1	254.097	-7.41778	0.498	-14.8951	3.54398e-50	7.98063e-50
ARSDP1	424.746	-13.5742	0.310057	-43.7797	0	0
ARSE	304.822	-3.14687	0.312144	-10.0815	6.67223e-24	1.02797e-23
ARSEP1	351.509	-12.2766	0.852666	-14.3979	5.33091e-47	1.15126e-46
ARSF	1645.87	-5.93485	0.505024	-11.7516	6.92769e-32	1.22322e-31
ARSFP1	216.783	-11.8974	0.355113	-33.5031	4.34903e-246	4.50548e-245
ARSG	374.227	10.6238	0.774108	13.7239	7.30226e-43	1.49299e-42
ARSH	56.2849	-9.2727	0.529257	-17.5202	1.00407e-68	3.01371e-68
ARSI	177.958	9.55171	0.901046	10.6007	2.95775e-26	4.77017e-26
ARSK	544.314	-2.49481	0.151777	-16.4374	1.0327e-60	2.73772e-60
ART1	115.834	-10.135	0.352181	-28.7778	4.07205e-182	2.9503e-181
ART2BP	346.123	-13.8685	1.41003	-9.83561	7.90852e-23	1.19471e-22
ART2P	494.18	-14.3822	0.303729	-47.3521	0	0
ART3	810.566	-5.864	0.447713	-13.0977	3.39496e-39	6.62391e-39
ART5	82.4907	-6.60355	0.566102	-11.6649	1.92531e-31	3.37705e-31
ARTN	266.812	-5.48094	0.282835	-19.3786	1.17021e-83	4.25213e-83
ARV1	1470.33	-4.08828	0.135911	-30.0807	8.67558e-199	6.85212e-198
ARVCF	1709.33	-1.45322	0.241674	-6.01314	1.81968e-09	2.16787e-09
ARX	525.991	-4.60663	0.608289	-7.5731	3.64413e-14	4.66231e-14
AS3MT	1448.48	-9.02478	0.247722	-36.431	1.37484e-290	1.84809e-289
ASAH2	965.369	-7.90002	0.285491	-27.6717	1.52961e-168	1.01947e-167
ASAH2B	82.2765	7.71707	0.752946	10.2492	1.1936e-24	1.86861e-24
ASAP1	3541.79	5.50676	0.170017	32.3895	3.85724e-230	3.63637e-229
ASAP1-IT2	134.319	-2.36216	0.238294	-9.9128	3.6622e-23	5.57267e-23
ASAP2	2258.15	1.20317	0.227074	5.29859	1.16699e-07	1.35414e-07
ASAP3	2666.92	1.2455	0.215688	5.77457	7.71517e-09	9.11379e-09
ASB1	1969.64	0.902616	0.131573	6.86021	6.87573e-12	8.48231e-12
ASB10	233.866	-10.6494	0.653975	-16.2841	1.27925e-59	3.33352e-59
ASB11	559.881	-10.3036	0.464027	-22.2048	3.08986e-109	1.38803e-108
ASB13	393.42	9.97432	0.742201	13.4388	3.58063e-41	7.16426e-41
ASB14	527.381	-8.33503	0.482858	-17.2619	9.10922e-67	2.66032e-66
ASB15	101.478	-11.3891	0.366745	-31.0546	9.89054e-212	8.4132e-211
ASB16-AS1	537.249	-3.3707	0.179682	-18.7592	1.62691e-78	5.58657e-78
ASB17	1317.15	-15.5611	0.335357	-46.4014	0	0
ASB18	832.606	-13.4101	0.289462	-46.3278	0	0
ASB2	665.161	-7.0278	0.342198	-20.5372	1.00121e-93	3.99587e-93
ASB5	49.5804	-2.4684	0.59971	-4.116	3.85511e-05	4.30761e-05
ASB6	1249.66	5.74864	0.202252	28.4231	1.04724e-177	7.38407e-177
ASB7	7044.42	-5.73301	0.13381	-42.8443	0	0
ASB8	879.251	2.96457	0.117956	25.1328	2.17888e-139	1.20482e-138
ASB9	9155.33	-10.8993	0.236762	-46.0348	0	0
ASB9P1	5374.09	-17.8251	1.40267	-12.708	5.33637e-37	1.01211e-36
ASCC1	696.544	2.68257	0.180978	14.8226	1.04653e-49	2.34223e-49
ASCC2	6855.09	-4.72003	0.178219	-26.4845	1.464e-154	8.9748e-154
ASCC3	4273.63	5.27852	0.185166	28.507	9.58793e-179	6.81523e-178
ASCL1	2235.93	-4.32365	0.581881	-7.43048	1.08208e-13	1.37352e-13
ASCL2	401.29	-6.81206	0.331666	-20.5389	9.67163e-94	3.86058e-93
ASF1A	503.967	3.38716	0.235595	14.377	7.2119e-47	1.5553e-46
ASF1B	290.578	3.63731	0.311603	11.6729	1.75292e-31	3.07735e-31
ASGR1	5280.31	-8.62232	0.181161	-47.5949	0	0
ASGR2	36.9678	-2.79235	0.374502	-7.45619	8.9063e-14	1.13171e-13
ASH1L	14550.9	-1.96788	0.133717	-14.7167	5.03506e-49	1.11719e-48
ASH1L-AS1	6014.89	-8.40863	0.139827	-60.1359	0	0
ASH2L	991.047	5.58757	0.166099	33.6399	4.37626e-248	4.58792e-247
ASH2LP1	976.687	-14.1874	0.309917	-45.7782	0	0
ASIC1	3588.05	-4.88103	0.387511	-12.5958	2.2257e-36	4.1878e-36
ASIC2	1319.13	-7.42188	0.59454	-12.4834	9.19807e-36	1.71472e-35
ASIC3	159.913	-1.45664	0.316893	-4.59663	4.29377e-06	4.87335e-06
ASIC4	1224	4.62453	0.64989	7.11587	1.11211e-12	1.38779e-12
ASIP	3413.23	-10.2218	0.345132	-29.6172	8.98617e-193	6.9005e-192
ASL	778.634	11.6811	0.741626	15.7506	6.80083e-56	1.67007e-55
ASLP1	31.3236	6.68165	0.752705	8.87684	6.87862e-19	9.55564e-19
ASMTL	726.838	5.06126	0.194663	26.0001	4.93773e-149	2.91028e-148
ASMTL-AS1	129.31	5.94337	0.486856	12.2076	2.82973e-34	5.17113e-34
ASNA1	1644.92	12.0387	0.732318	16.4392	1.0031e-60	2.66007e-60
ASNS	1822.11	12.9076	0.75156	17.1744	4.12803e-66	1.19312e-65
ASNSD1	4680.62	-3.97972	0.13088	-30.4073	4.39948e-203	3.58018e-202
ASNSP3	669.018	-8.43837	0.303031	-27.8466	1.18485e-170	8.02299e-170
ASNSP6	207.228	-9.4379	0.554953	-17.0067	7.32836e-65	2.07634e-64
ASPA	737.22	-3.81423	0.48305	-7.89615	2.87649e-15	3.74896e-15
ASPDH	32.7246	7.1084	0.861333	8.25279	1.54739e-16	2.05877e-16
ASPH	7589.81	0.544294	0.187369	2.90493	0.00367332	0.00396025
ASPHD1	247.217	2.69319	0.366865	7.34108	2.11877e-13	2.67535e-13
ASPHD2	245.454	8.93154	0.769242	11.6108	3.63096e-31	6.34387e-31
ASPM	1575.68	10.7287	0.685742	15.6454	3.56876e-55	8.6618e-55
ASPN	167.153	7.1975	0.717664	10.0291	1.1359e-23	1.74412e-23
ASPRV1	126.599	0.79758	0.244281	3.26502	0.00109458	0.00119201
ASPSCR1	964.518	11.6291	0.732293	15.8803	8.66964e-57	2.15822e-56
ASRGL1	743.642	9.2296	0.589739	15.6503	3.30567e-55	8.02623e-55
ASS1	818.433	-1.27511	0.465584	-2.73874	0.00616755	0.00661729
ASS1P2	38.6239	7.34734	0.738163	9.95355	2.43342e-23	3.71513e-23
ASS1P6	475.505	-14.1501	0.325906	-43.4177	0	0
ASTE1	406.561	8.32676	0.527727	15.7785	4.37126e-56	1.07596e-55
ASTL	616.424	-9.89776	0.418811	-23.633	1.76533e-123	8.761e-123
ASTN2	2384.39	12.2108	0.800038	15.2627	1.35491e-52	3.16186e-52
ASUN	875.888	10.7693	0.72509	14.8523	6.71938e-50	1.50758e-49
ASXL1	4435.79	10.6937	0.365798	29.2338	7.21452e-188	5.40894e-187
ASXL2	3380.68	0.525566	0.109454	4.8017	1.57324e-06	1.79607e-06
ASXL3	853.946	-1.4914	0.4735	-3.14974	0.00163416	0.001773
ASZ1	291.67	-12.7373	0.388545	-32.7821	1.05936e-235	1.02933e-234
ATAD1	1204.42	12.3103	0.738617	16.6667	2.29074e-62	6.24601e-62
ATAD2	1804.3	10.3172	0.53474	19.2939	6.04651e-83	2.1847e-82
ATAD2B	2215.73	13.1897	0.731615	18.0282	1.16982e-72	3.71474e-72
ATAD3A	612.95	5.44301	0.212782	25.5803	2.53024e-144	1.44437e-143
ATAD3B	1042.04	11.0192	0.736115	14.9694	1.16321e-50	2.63589e-50
ATAD3C	565.285	-5.43067	0.375817	-14.4503	2.49609e-47	5.4141e-47
ATAD5	447.153	4.79146	0.287112	16.6885	1.58898e-62	4.34565e-62
ATAT1	653.699	10.0035	0.726837	13.7631	4.24975e-43	8.71936e-43
ATCAY	1033.4	11.3679	0.957518	11.8723	1.64921e-32	2.93785e-32
ATE1	976.324	9.77355	0.562413	17.3779	1.21368e-67	3.58916e-67
ATE1-AS1	38.722	7.35051	0.875554	8.39527	4.64814e-17	6.24845e-17
ATF1	365.82	4.13697	0.190118	21.76	5.55796e-105	2.42911e-104
ATF4	4950.14	2.4293	0.166144	14.6216	2.04483e-48	4.49875e-48
ATF4P1	928.513	-14.5264	0.368722	-39.3965	0	0
ATF4P2	104.629	-11.0778	0.346866	-31.9369	8.22479e-224	7.45962e-223
ATF4P3	1229.08	-7.59261	0.281562	-26.9661	3.69581e-160	2.3438e-159
ATF4P4	3154.1	-13.2065	0.212901	-62.0311	0	0
ATF5	781.257	-1.4465	0.279231	-5.18032	2.21511e-07	2.56019e-07
ATF6	3220.85	6.51449	0.134615	48.3935	0	0
ATF6B	2214.77	-0.84823	0.143697	-5.90292	3.57129e-09	4.23717e-09
ATF7	1532.04	1.37663	0.195179	7.05315	1.7491e-12	2.17731e-12
ATF7IP	6263.14	14.3282	0.732148	19.57	2.78556e-85	1.03025e-84
ATF7IP2	168.537	8.75097	0.789539	11.0837	1.50603e-28	2.53524e-28
ATG10	373.305	9.18703	0.712852	12.8877	5.27862e-38	1.0147e-37
ATG101	1681.87	-3.09907	0.174222	-17.788	8.75618e-71	2.71301e-70
ATG10-IT1	173.124	-6.22778	0.21159	-29.4332	2.06513e-190	1.56389e-189
ATG12	1616	12.3737	0.735435	16.825	1.60086e-63	4.44565e-63
ATG13	2363.06	9.39524	0.332231	28.2792	6.22848e-176	4.35199e-175
ATG14	1188.36	12.2909	0.743072	16.5406	1.87124e-61	5.0138e-61
ATG16L1	2809.96	-2.70914	0.111696	-24.2546	5.91973e-130	3.07118e-129
ATG16L2	1148.24	1.64469	0.192877	8.52715	1.49999e-17	2.03232e-17
ATG2A	5290.95	-4.11311	0.193164	-21.2934	1.30753e-100	5.51121e-100
ATG2B	3065.7	9.29023	0.293853	31.6152	2.28365e-219	2.01896e-218
ATG3	1228.91	7.03076	0.234298	30.0078	7.7657e-198	6.10779e-197
ATG3P1	3103.47	-16.6208	0.452571	-36.7253	2.88346e-295	4.00078e-294
ATG4A	2935.63	-5.31673	0.174617	-30.448	1.27452e-203	1.04072e-202
ATG4B	2744.52	-1.60151	0.123905	-12.9253	3.23972e-38	6.24088e-38
ATG4C	2325.4	-3.76113	0.192774	-19.5106	8.92407e-85	3.28169e-84
ATG4D	449.523	5.81636	0.261225	22.2657	7.94076e-110	3.5794e-109
ATG5	932.452	0.944176	0.164214	5.74967	8.94158e-09	1.05516e-08
ATG9B	69.352	5.96477	0.732953	8.138	4.01864e-16	5.31099e-16
ATHL1	980.475	12.0135	0.769588	15.6103	6.1924e-55	1.49703e-54
ATIC	793.109	4.53526	0.202039	22.4474	1.35637e-111	6.18186e-111
ATL1	556.256	11.1957	0.749416	14.9393	1.82917e-50	4.13288e-50
ATL2	1129.83	12.2182	0.7318	16.696	1.40036e-62	3.8334e-62
ATM	8464.16	13.3828	0.65641	20.3878	2.14511e-92	8.45471e-92
ATMIN	2603.4	13.4224	0.732958	18.3126	6.56898e-75	2.14557e-74
ATN1	2957.38	-2.17627	0.228033	-9.54366	1.37882e-21	2.0242e-21
ATOH1	125.274	-10.8234	0.329022	-32.8958	2.5239e-237	2.48357e-236
ATOH7	189.154	-7.9754	0.288149	-27.6781	1.28226e-168	8.55695e-168
ATOH8	4205.75	-5.57858	0.365656	-15.2564	1.49305e-52	3.48145e-52
ATOX1	2638.22	-3.85004	0.130186	-29.5733	3.29184e-192	2.51532e-191
ATP10A	575.9	8.21295	0.51871	15.8334	1.82993e-56	4.5301e-56
ATP10B	616.312	10.9829	0.965707	11.3729	5.70323e-30	9.7933e-30
ATP10D	2196.29	9.16725	0.343052	26.7227	2.56737e-157	1.60304e-156
ATP11A	3365.36	2.11378	0.242096	8.73118	2.5202e-18	3.46205e-18
ATP11A-AS1	501.146	-11.945	0.285003	-41.9117	0	0
ATP11B	2448.91	1.53685	0.13951	11.0161	3.19712e-28	5.35494e-28
ATP11C	1088.58	6.00885	0.243654	24.6614	2.77971e-134	1.48762e-133
ATP12A	6346.25	-11.148	0.892219	-12.4946	7.98526e-36	1.49011e-35
ATP13A1	2740.5	-1.34638	0.140318	-9.59514	8.38019e-22	1.23592e-21
ATP13A2	2881.76	-1.72499	0.164805	-10.4669	1.22609e-25	1.95438e-25
ATP13A3	7168.29	3.0325	0.246407	12.3069	8.32038e-35	1.53081e-34
ATP13A4	5308.95	1.04067	0.390512	2.66488	0.00770166	0.00824511
ATP13A4-AS1	706.27	-8.05031	0.483804	-16.6396	3.59924e-62	9.76824e-62
ATP13A5	314.157	-2.11492	0.383471	-5.5152	3.48376e-08	4.07322e-08
ATP1A1	16120.3	0.544722	0.179568	3.03351	0.00241724	0.00261549
ATP1A1-AS1	11849	-8.80429	0.23383	-37.6526	0	0
ATP1A3	3789.31	-3.64433	0.613628	-5.93899	2.86784e-09	3.40717e-09
ATP1A4	1261.99	-7.67349	0.650157	-11.8025	3.78793e-32	6.71404e-32
ATP1B1P1	996.503	-5.8192	0.0998592	-58.2741	0	0
ATP1B3	2535.96	-0.518748	0.172833	-3.00143	0.00268712	0.00290464
ATP1B3P1	421.811	-10.9365	0.254465	-42.9782	0	0
ATP1B4	200.186	-7.72601	0.633664	-12.1926	3.40407e-34	6.21249e-34
ATP2A1	168.523	-4.14703	0.217502	-19.0666	4.786e-81	1.69206e-80
ATP2A1-AS1	1568.66	-8.37113	0.217511	-38.486	0	0
ATP2A3	131.837	3.43951	0.369975	9.2966	1.45014e-20	2.08592e-20
ATP2B1	5277.49	2.15364	0.186868	11.525	9.87488e-31	1.71504e-30
ATP2B2	1561.03	3.8941	0.458278	8.49726	1.94122e-17	2.62554e-17
ATP2B2-IT1	287.753	-8.86317	0.48121	-18.4185	9.33047e-76	3.08121e-75
ATP2B3	338.338	-3.63499	0.64644	-5.62309	1.87576e-08	2.20235e-08
ATP2B4	11383.8	8.77727	0.27568	31.8386	1.89072e-222	1.69958e-221
ATP2C1	4257.4	9.59487	0.290591	33.0185	4.40777e-239	4.38161e-238
ATP4A	454.381	-11.0817	0.462444	-23.9634	6.70165e-127	3.41023e-126
ATP4B	52.548	-8.0122	0.968395	-8.27369	1.29871e-16	1.73142e-16
ATP5A1	9015.03	4.254	0.16787	25.341	1.12827e-141	6.34557e-141
ATP5A1P2	1097.24	-13.3961	0.275773	-48.5764	0	0
ATP5A1P6	112.452	-9.14291	0.72346	-12.6378	1.30741e-36	2.46722e-36
ATP5B	9837.08	13.5963	0.659613	20.6125	2.11899e-94	8.49697e-94
ATP5C1	1653.92	11.6862	0.726587	16.0837	3.31872e-58	8.45698e-58
ATP5D	979.279	-0.824108	0.176288	-4.67477	2.94281e-06	3.34726e-06
ATP5E	3617.42	2.09019	0.139558	14.9772	1.03455e-50	2.34616e-50
ATP5EP1	350.206	-13.7087	0.460235	-29.7863	5.88129e-195	4.55752e-194
ATP5F1	2908.96	9.64017	0.318761	30.2427	6.51358e-201	5.22936e-200
ATP5F1P1	109.934	-2.39233	0.24764	-9.6605	4.43707e-22	6.58189e-22
ATP5F1P4	449.786	-11.2914	0.52359	-21.5654	3.79314e-103	1.63524e-102
ATP5F1P5	1746.36	-8.2947	0.337394	-24.5846	1.84378e-133	9.80553e-133
ATP5F1P6	222.983	-12.1138	0.301496	-40.1788	0	0
ATP5G1	726.747	11.5815	0.734929	15.7587	5.98804e-56	1.47144e-55
ATP5G1P1	1659.31	-16.1297	1.47666	-10.9231	8.94217e-28	1.4846e-27
ATP5G1P3	454.541	-8.96208	0.339838	-26.3717	2.89769e-153	1.75915e-152
ATP5G1P5	138.708	-10.1402	0.635113	-15.966	2.20473e-57	5.53984e-57
ATP5G1P7	258.178	-13.151	0.326608	-40.2654	0	0
ATP5G1P8	456.584	-14.2092	0.446083	-31.8534	1.18229e-222	1.06423e-221
ATP5G2	2564.93	3.28679	0.128414	25.5953	1.72177e-144	9.84141e-144
ATP5G2P1	67.084	-11.0276	0.361618	-30.4951	3.02587e-204	2.47771e-203
ATP5G2P4	119.471	-10.706	0.343196	-31.195	1.24402e-213	1.07067e-212
ATP5H	3767.72	-3.00931	0.12017	-25.0422	2.12433e-138	1.16729e-137
ATP5HP1	290.465	-13.026	0.372036	-35.0128	1.43594e-268	1.68625e-267
ATP5HP2	262.836	-7.36946	0.584781	-12.6021	2.05673e-36	3.87125e-36
ATP5HP4	152.133	-8.83474	0.259988	-33.9814	4.19676e-253	4.5335e-252
ATP5I	1186.54	11.9281	0.734331	16.2435	2.48159e-59	6.43539e-59
ATP5J	802.088	9.30818	0.529755	17.5707	4.12785e-69	1.24708e-68
ATP5J2	1531.6	1.93425	0.127226	15.2033	3.36346e-52	7.8068e-52
ATP5J2P6	41.1694	-10.6797	0.348052	-30.6842	9.23466e-207	7.65711e-206
ATP5JP1	50.3415	-10.7908	0.397965	-27.115	6.55364e-162	4.21308e-161
ATP5L	1654.1	1.98945	0.129591	15.3518	3.44452e-53	8.11967e-53
ATP5LP3	656.588	-13.9084	0.318782	-43.6298	0	0
ATP5LP6	165.155	-6.31202	0.287238	-21.9749	5.00992e-107	2.21686e-106
ATP5LP7	643.741	-14.7637	1.41922	-10.4027	2.41117e-25	3.82462e-25
ATP5O	1217.22	2.10375	0.116388	18.0753	4.9894e-73	1.59129e-72
ATP5S	1022.67	5.23061	0.233443	22.4064	3.40653e-111	1.55016e-110
ATP5SL	966.911	-1.74013	0.136258	-12.7709	2.38535e-37	4.54478e-37
ATP6AP1	3818.23	2.15085	0.15363	14.0002	1.55456e-44	3.2556e-44
ATP6AP1L	516.955	-0.820804	0.175331	-4.68146	2.84839e-06	3.24071e-06
ATP6AP2	3671.15	13.9182	0.7339	18.9647	3.33956e-80	1.16889e-79
ATP6V0A2	2168.28	-1.1256	0.136375	-8.25371	1.53558e-16	2.04327e-16
ATP6V0A4	121.458	-6.56015	0.641562	-10.2253	1.52802e-24	2.38789e-24
ATP6V0B	3610.74	-1.97737	0.165568	-11.9429	7.06793e-33	1.26678e-32
ATP6V0C	318.841	-1.337	0.166323	-8.03856	9.09011e-16	1.19515e-15
ATP6V0CP2	2079.46	-14.9892	0.375072	-39.9634	0	0
ATP6V0CP3	96.875	-11.0856	0.612328	-18.104	2.96204e-73	9.46996e-73
[truncated: 23,003 more rows]

## Sheet: NPC DEGs
Gene	baseMean	log2FoldChange	lfcSE	stat	pvalue	padj
7SK	39.032	0.905821	0.242711	3.73209	0.000189898	0.000391356
A2M	50618	2.61344	0.326924	7.99403	1.30594e-15	9.99502e-15
A2M-AS1	117.477	-0.619124	0.252648	-2.45054	0.0142642	0.0220393
AAAS	1377.72	0.950434	0.132848	7.15427	8.4121e-13	4.69763e-12
AACS	1800.61	-1.89862	0.145199	-13.076	4.51648e-39	2.76025e-37
AAED1	528.031	1.29418	0.140703	9.19802	3.64615e-20	4.62873e-19
AAGAB	1970.28	-0.726219	0.138019	-5.26175	1.42691e-07	4.36028e-07
AAK1	7582.29	-1.89257	0.108877	-17.3827	1.11559e-67	6.24668e-65
AAMDC	283.031	0.722376	0.147576	4.89495	9.83302e-07	2.71591e-06
AAR2	1185.39	1.06501	0.107208	9.93408	2.95887e-23	5.04128e-22
AARS	8861.92	-0.758505	0.133796	-5.66914	1.4352e-08	4.93846e-08
AASDHPPT	2592.03	-1.41019	0.178504	-7.90008	2.7872e-15	2.05792e-14
AASS	3236.57	1.42353	0.238713	5.96333	2.47143e-09	9.27424e-09
AATBC	39.658	1.85161	0.539236	3.43377	0.000595254	0.00113747
AATF	1644.74	0.784183	0.124335	6.30702	2.84451e-10	1.19008e-09
AATK	2228.63	-2.32908	0.510915	-4.55864	5.14859e-06	1.29941e-05
ABAT	9596.69	-1.10867	0.296628	-3.7376	0.000185786	0.000383303
ABCA1	22312.9	3.5688	0.253298	14.0893	4.41936e-45	4.51036e-43
ABCA10	495.054	-2.42867	0.345114	-7.03729	1.96015e-12	1.05072e-11
ABCA11P	120.242	-0.499296	0.196798	-2.53711	0.0111773	0.017586
ABCA12	84.8986	1.65446	0.468616	3.53053	0.000414731	0.00081045
ABCA13	872.875	6.61268	0.6823	9.69175	3.26876e-22	5.05012e-21
ABCA17P	144.286	-1.92295	0.267491	-7.18884	6.53426e-13	3.7039e-12
ABCA2	8561.32	-1.60105	0.331464	-4.83022	1.36383e-06	3.69744e-06
ABCA3	4551.99	-1.41328	0.159332	-8.87006	7.31042e-19	8.03913e-18
ABCA5	2382.2	-2.06993	0.308914	-6.70067	2.0747e-11	9.85639e-11
ABCA6	802.245	-0.969139	0.456669	-2.12219	0.0338215	0.0489291
ABCA7	606.282	-0.830175	0.311316	-2.66666	0.00766086	0.0123612
ABCA9	674.028	-1.24988	0.437429	-2.85734	0.00427215	0.00718603
ABCB1	1198.62	-0.788898	0.322893	-2.44322	0.014557	0.0224616
ABCB11	25.4757	1.87097	0.714302	2.6193	0.00881098	0.0140832
ABCB4	251.706	2.78361	0.2754	10.1075	5.11563e-24	9.37096e-23
ABCB7	1342.4	0.694432	0.105318	6.59364	4.29173e-11	1.96247e-10
ABCB9	939.585	-1.39139	0.185058	-7.51867	5.53381e-14	3.55502e-13
ABCC1	1935.14	0.756972	0.281098	2.69291	0.00708316	0.0114962
ABCC11	45.3173	-0.726962	0.251432	-2.89128	0.00383672	0.006499
ABCC12	56.3809	-4.70859	0.554317	-8.49439	1.98969e-17	1.88059e-16
ABCC2	67.3623	0.775011	0.272545	2.84361	0.00446054	0.00747913
ABCC3	3108.73	5.2784	0.475234	11.1069	1.16069e-28	3.27619e-27
ABCC4	1309.45	1.18924	0.187851	6.33079	2.43916e-10	1.0265e-09
ABCC5	5080.64	-0.615015	0.170889	-3.59892	0.000319542	0.000636197
ABCC6	79.0112	0.863916	0.378541	2.28223	0.022476	0.033544
ABCC8	937.806	-2.42903	0.565468	-4.29561	1.74216e-05	4.10309e-05
ABCD1	505.938	1.9717	0.239306	8.23921	1.73348e-16	1.46349e-15
ABCD2	969.742	-1.55779	0.364699	-4.27143	1.94224e-05	4.54681e-05
ABCD3	3580.12	0.493415	0.130162	3.79078	0.000150175	0.000313452
ABCD4	2104.28	0.50094	0.139346	3.59493	0.000324481	0.000645038
ABCF1	2788.77	0.728922	0.125659	5.80078	6.60091e-09	2.3587e-08
ABCF2	3259.79	0.270177	0.115114	2.34704	0.0189233	0.0286253
ABCG4	221.137	-3.83379	0.360519	-10.6341	2.06895e-26	4.72597e-25
ABHD10	1214.69	-0.870255	0.120843	-7.20154	5.95371e-13	3.39524e-12
ABHD11	459.108	0.484948	0.175187	2.76818	0.00563702	0.00930135
ABHD12B	87.9366	-3.31783	0.603412	-5.49844	3.83164e-08	1.24935e-07
ABHD13	852.81	-0.940451	0.159729	-5.8878	3.91359e-09	1.4333e-08
ABHD14A	348.54	-1.5498	0.180244	-8.59833	8.08846e-18	8.00653e-17
ABHD14B	546.482	0.961457	0.191266	5.02681	4.98711e-07	1.42475e-06
ABHD15	431.363	1.39032	0.197194	7.05049	1.78286e-12	9.59408e-12
ABHD16A	305.591	0.584212	0.117202	4.98465	6.2075e-07	1.75166e-06
ABHD17B	892.798	-0.975157	0.171441	-5.688	1.28537e-08	4.44579e-08
ABHD3	591.087	0.923761	0.179657	5.1418	2.72113e-07	8.03081e-07
ABHD4	1276.52	1.57466	0.177654	8.86363	7.74499e-19	8.49448e-18
ABHD5	858.546	0.9255	0.141733	6.5299	6.58127e-11	2.94685e-10
ABHD6	939.044	-0.80532	0.235698	-3.41675	0.000633736	0.00120512
ABHD8	917.95	-2.05899	0.199195	-10.3366	4.8147e-25	9.64104e-24
ABI1	2653.99	-0.65015	0.204224	-3.18352	0.00145494	0.00262026
ABI2	10006.2	-0.948735	0.174849	-5.42603	5.7622e-08	1.84543e-07
ABI3	530.215	2.31736	0.339217	6.8315	8.4031e-12	4.18901e-11
ABI3BP	387	1.32788	0.488882	2.71615	0.00660464	0.0107727
ABL1	4694.87	1.10704	0.156859	7.05754	1.69474e-12	9.15793e-12
ABLIM1	8157.8	-1.02734	0.165634	-6.20244	5.55943e-10	2.24436e-09
ABLIM2	1143.33	-3.41531	0.349164	-9.78139	1.35345e-22	2.16531e-21
ABLIM3	1229.69	-1.08912	0.341997	-3.18459	0.00144958	0.00261106
ABO	38.1607	-1.86382	0.467898	-3.98338	6.79424e-05	0.000148156
ABR	9779.41	-2.01363	0.15084	-13.3495	1.19266e-40	8.15495e-39
ABT1	627.578	0.547251	0.121201	4.51524	6.32462e-06	1.57739e-05
ABTB1	869.238	-1.46062	0.201634	-7.24388	4.36016e-13	2.52329e-12
AC000095.11	28.7513	-3.05086	0.541453	-5.63459	1.75474e-08	5.96662e-08
AC000120.7	165.396	1.0018	0.168151	5.95773	2.55758e-09	9.57672e-09
AC000123.2	629.902	0.80205	0.190921	4.20096	2.65789e-05	6.10693e-05
AC000123.3	124.48	0.807732	0.187312	4.31222	1.61623e-05	3.81943e-05
AC000403.4	40.9698	-3.03929	0.252099	-12.056	1.80381e-33	7.41493e-32
AC002044.1	62.5721	1.43151	0.263354	5.43569	5.45834e-08	1.75354e-07
AC002044.3	26.0539	1.42878	0.3096	4.61493	3.93226e-06	1.00578e-05
AC002366.3	48.6008	2.22951	0.330563	6.74459	1.53463e-11	7.40265e-11
AC002454.1	26.556	2.96498	0.562877	5.26755	1.38259e-07	4.2311e-07
AC002456.2	29.3552	2.68854	0.359067	7.48757	7.01593e-14	4.44786e-13
AC003003.5	33.2032	1.15123	0.443768	2.59422	0.0094806	0.0150813
AC003005.2	27.5815	1.17887	0.363991	3.23873	0.00120061	0.00219118
AC003080.4	229.551	1.10071	0.198301	5.55068	2.84552e-08	9.43861e-08
AC003090.1	89.9822	1.41471	0.461219	3.06733	0.0021598	0.00379627
AC003104.1	148.259	1.03403	0.203501	5.0812	3.75058e-07	1.08769e-06
AC003973.3	34.0181	-2.28724	0.545145	-4.19566	2.72079e-05	6.24383e-05
AC004019.10	66.8365	1.50462	0.390082	3.8572	0.000114693	0.000243115
AC004053.1	37.5427	-3.45579	0.283976	-12.1693	4.53026e-34	1.96767e-32
AC004067.5	26.6617	1.88148	0.311431	6.04142	1.5276e-09	5.87721e-09
AC004381.6	311.074	0.801794	0.273678	2.9297	0.00339291	0.00579555
AC004538.3	54.7356	0.938303	0.314751	2.98109	0.0028722	0.00496258
AC004540.4	149.441	2.57578	0.63302	4.06904	4.72076e-05	0.000104896
AC004702.2	40.9852	1.04687	0.246941	4.23934	2.24177e-05	5.20625e-05
AC004893.11	373.543	0.537888	0.213539	2.51892	0.0117717	0.018444
AC004967.7	251.988	0.887595	0.160172	5.54152	2.99863e-08	9.91629e-08
AC004980.7	629.113	0.9658	0.185477	5.2071	1.91812e-07	5.76188e-07
AC004985.12	77.8234	0.506934	0.226154	2.24155	0.0249907	0.037017
AC005154.6	5371.39	0.469395	0.143453	3.27212	0.00106742	0.00196315
AC005306.3	75.2229	1.10362	0.248427	4.44243	8.89497e-06	2.17626e-05
AC005518.2	44.926	-2.61588	0.85651	-3.05412	0.00225724	0.00395581
AC005534.8	31.1031	1.30857	0.328146	3.98775	6.67023e-05	0.000145636
AC005537.2	27.9074	-3.22895	0.45186	-7.1459	8.9405e-13	4.96993e-12
AC005562.1	162.271	0.833963	0.174651	4.77501	1.79698e-06	4.79519e-06
AC005618.6	695.48	2.31612	0.401736	5.76527	8.15261e-09	2.88284e-08
AC005682.5	94.2716	2.64089	0.434649	6.07591	1.23283e-09	4.79118e-09
AC005682.6	37.483	3.45508	0.478223	7.22484	5.01696e-13	2.88296e-12
AC005754.8	134.331	1.07362	0.485104	2.21317	0.0268856	0.0396058
AC005786.7	32.1038	-0.860444	0.325871	-2.64045	0.0082797	0.0132914
AC006019.1	59.5528	2.86951	0.53748	5.33881	9.35566e-08	2.92194e-07
AC006077.3	33.2002	1.68168	0.263945	6.37132	1.87409e-10	7.98094e-10
AC006116.19	40.014	0.530915	0.232172	2.28673	0.0222114	0.0331825
AC006116.21	39.3972	0.897593	0.249961	3.59093	0.000329496	0.000654381
AC006129.2	42.6039	1.66554	0.440293	3.78279	0.000155077	0.000323131
AC006195.2	38.0136	1.2843	0.191795	6.69623	2.1386e-11	1.01437e-10
AC006538.1	97.4487	-1.77485	0.233826	-7.59047	3.18756e-14	2.10117e-13
AC006547.14	65.1287	2.38044	0.394223	6.03831	1.5574e-09	5.98743e-09
AC006946.15	29.6159	-2.22641	0.328757	-6.77222	1.26819e-11	6.18949e-11
AC006947.1	33.6419	0.628097	0.254176	2.47111	0.0134695	0.0209019
AC006978.6	615.982	0.709198	0.220077	3.2225	0.00127078	0.00230886
AC007036.4	48.884	-0.610451	0.258214	-2.36413	0.0180726	0.0274105
AC007163.3	34.3256	-2.01775	0.772113	-2.61329	0.00896761	0.0143125
AC007228.11	90.8741	-0.621827	0.220547	-2.81948	0.00481017	0.00802779
AC007246.3	486.85	-2.37547	0.14142	-16.7972	2.55805e-63	1.08159e-60
AC007292.3	39.6112	0.827343	0.287118	2.88154	0.00395734	0.00668801
AC007383.3	102.173	0.473504	0.178696	2.64977	0.00805457	0.0129591
AC007392.3	24.1345	4.64007	0.699638	6.6321	3.30937e-11	1.53558e-10
AC007563.5	37.8498	-1.6518	0.386474	-4.27403	1.91971e-05	4.49814e-05
AC007682.1	92.9225	3.42047	0.725994	4.71143	2.4598e-06	6.45335e-06
AC007743.1	64.8106	-1.94721	0.338839	-5.74672	9.09901e-09	3.19297e-08
AC007796.1	32.2095	-2.17912	0.244828	-8.90059	5.55513e-19	6.1877e-18
AC008269.2	110.453	-3.05612	0.305664	-9.99832	1.55009e-23	2.70099e-22
AC008982.2	73.0666	1.97718	0.201838	9.79586	1.17299e-22	1.88533e-21
AC009005.2	32.3702	2.44103	0.343232	7.1119	1.1446e-12	6.28515e-12
AC009133.12	63.6191	0.898603	0.293781	3.05875	0.00222261	0.00390072
AC009166.7	287.764	1.581	0.353942	4.46684	7.93845e-06	1.95215e-05
AC009303.2	38.4876	-0.52254	0.231893	-2.25336	0.0242363	0.0359922
AC009303.3	26.8699	1.05111	0.242255	4.33885	1.43231e-05	3.40813e-05
AC009403.2	214.066	0.569555	0.143454	3.9703	7.17811e-05	0.000156034
AC009404.2	233.329	0.670453	0.17027	3.93758	8.23081e-05	0.000177557
AC009518.4	40.7935	5.72941	0.809564	7.07716	1.47134e-12	7.99248e-12
AC009948.5	409.765	0.378711	0.143467	2.6397	0.00829796	0.0133186
AC009948.7	29.839	-0.755929	0.224673	-3.36458	0.000766615	0.00144192
AC010127.3	82.7726	-1.90405	0.457229	-4.16432	3.1228e-05	7.11516e-05
AC010150.1	28.1854	1.58222	0.251529	6.29041	3.16635e-10	1.31543e-09
AC010642.1	169.646	0.74914	0.202495	3.69955	0.00021598	0.000442074
AC010729.1	47.3931	5.1781	0.618299	8.37475	5.53432e-17	4.95506e-16
AC010900.2	55.0604	0.427231	0.175919	2.42856	0.0151588	0.0233138
AC010980.2	32.012	-1.50502	0.425716	-3.53527	0.000407354	0.000796996
AC011196.3	37.7272	-2.78326	0.846403	-3.28834	0.00100782	0.00186146
AC011288.2	29.7779	-2.84842	0.553249	-5.14854	2.62527e-07	7.75896e-07
AC011322.1	46.4422	-5.67848	0.575917	-9.85989	6.21204e-23	1.02387e-21
AC011747.4	77.7302	-1.00721	0.369146	-2.72849	0.00636259	0.0104115
AC011899.9	105.646	4.08739	0.422923	9.66463	4.26152e-22	6.54002e-21
AC011995.1	149.25	-4.53898	0.670776	-6.76676	1.31694e-11	6.4093e-11
AC012074.2	67.4376	-2.2546	0.305833	-7.372	1.68082e-13	1.02361e-12
AC012358.4	25.9709	-1.52511	0.37619	-4.05409	5.03303e-05	0.000111452
AC012370.2	86.4725	1.05113	0.209212	5.0242	5.05529e-07	1.44343e-06
AC012507.3	33.976	-1.50405	0.379409	-3.96419	7.36459e-05	0.000159836
AC012531.25	26.1703	5.11298	0.759336	6.73349	1.65638e-11	7.96217e-11
AC013460.1	44.3391	-1.77233	0.322348	-5.49817	3.83762e-08	1.2508e-07
AC013463.2	38.2648	-0.738034	0.315169	-2.3417	0.0191959	0.0289954
AC015923.2	48.0471	0.904782	0.247775	3.65162	0.00026059	0.000526105
AC015936.3	362.796	2.07996	0.508447	4.0908	4.29891e-05	9.59853e-05
AC016549.1	276.459	1.22388	0.205824	5.94622	2.74401e-09	1.02396e-08
AC016757.3	56.7503	-1.97482	0.450852	-4.3802	1.18571e-05	2.85379e-05
AC016907.3	32.9804	-0.574122	0.237102	-2.42141	0.0154605	0.0237443
AC016995.3	29.3893	-2.75012	0.416914	-6.59636	4.21368e-11	1.92926e-10
AC017002.2	227.336	4.15705	0.342122	12.1508	5.68006e-34	2.45166e-32
AC017035.2	25.8602	0.541871	0.255123	2.12396	0.0336735	0.0487422
AC017104.3	22.7613	1.43583	0.239607	5.99243	2.06727e-09	7.8371e-09
AC018442.1	69.3916	0.725848	0.212125	3.4218	0.000622082	0.00118501
AC018463.1	29.1824	0.513666	0.217182	2.36514	0.0180234	0.0273419
AC018647.3	133.367	-1.01335	0.433478	-2.33773	0.0194013	0.0292672
AC018738.2	41.2222	1.3884	0.273689	5.07291	3.91771e-07	1.13204e-06
AC018766.4	110.711	1.46369	0.226389	6.46538	1.01046e-10	4.42968e-10
AC019118.3	46.4285	-2.78219	0.326605	-8.51854	1.61582e-17	1.54412e-16
AC020951.1	407.558	1.13884	0.24539	4.64091	3.46871e-06	8.91955e-06
AC021188.4	54.8414	1.09	0.317524	3.43281	0.000597365	0.00114119
AC021218.2	24.9763	3.37464	0.746762	4.51903	6.21243e-06	1.55046e-05
AC022153.1	25.768	-1.91192	0.449341	-4.25493	2.09111e-05	4.87385e-05
AC022182.1	30.211	1.08475	0.410397	2.64318	0.00821311	0.0131927
AC022819.3	25.5247	1.13148	0.264595	4.27625	1.90068e-05	4.45556e-05
AC023481.1	53.4983	0.921494	0.337611	2.72945	0.006344	0.0103852
AC024560.3	1187.19	-0.629984	0.127682	-4.93402	8.05527e-07	2.24667e-06
AC025171.1	222.648	2.30802	0.217561	10.6086	2.71746e-26	6.11961e-25
AC025335.1	192.488	-0.895538	0.128271	-6.98158	2.91872e-12	1.53322e-11
AC026904.1	28.3758	2.66299	0.412096	6.46205	1.03296e-10	4.52161e-10
AC027612.4	428.928	7.05387	0.68453	10.3047	6.71072e-25	1.32665e-23
AC034220.3	387.373	-0.903691	0.240394	-3.75921	0.000170448	0.000352993
AC044907.1	56.3336	-1.1224	0.28657	-3.91665	8.97889e-05	0.000192792
AC062017.1	31.7268	0.863097	0.346839	2.48847	0.0128295	0.0199577
AC062028.1	91.1216	-4.54362	0.556091	-8.17065	3.06739e-16	2.51984e-15
AC064850.4	68.4694	0.936174	0.274437	3.41125	0.00064665	0.00122765
AC064875.2	940.353	3.99302	0.449851	8.87632	6.91084e-19	7.624e-18
AC067940.1	28.1115	0.591388	0.233084	2.53723	0.0111732	0.0175821
AC067945.3	47.2409	1.6557	0.386709	4.2815	1.85634e-05	4.35633e-05
AC067956.1	96.3804	-4.95572	0.520252	-9.52561	1.64072e-21	2.36881e-20
AC068057.1	35.5429	1.16526	0.370121	3.14832	0.00164215	0.00293546
AC068282.3	74.2374	-0.646343	0.265728	-2.43235	0.0150012	0.0230937
AC068535.2	24.3981	2.1106	0.53874	3.91767	8.94104e-05	0.000192059
AC068580.5	68.0906	1.55552	0.378763	4.10683	4.01124e-05	8.99209e-05
AC069213.1	49.076	-1.92617	0.457844	-4.20705	2.5873e-05	5.95662e-05
AC072062.1	70.8292	1.97296	0.309327	6.37822	1.79161e-10	7.64228e-10
AC072062.3	40.508	2.48567	0.460304	5.40007	6.66134e-08	2.12029e-07
AC073046.25	60.0504	2.52841	0.241722	10.46	1.3186e-25	2.76785e-24
AC073052.1	130.569	0.648562	0.147323	4.40233	1.07097e-05	2.593e-05
AC073109.2	197.728	1.36565	0.39211	3.48282	0.000496165	0.000958466
AC073283.4	90.6947	1.76222	0.302405	5.82736	5.63101e-09	2.0254e-08
AC073326.3	29.604	1.83152	0.399002	4.59025	4.42722e-06	1.12723e-05
AC073343.13	105.701	0.526535	0.229075	2.29853	0.0215316	0.0322484
AC074117.10	151.654	0.998821	0.165133	6.04858	1.46128e-09	5.63251e-09
AC074212.5	26.0354	1.45717	0.406091	3.58828	0.000332863	0.000660624
AC074289.1	154.581	1.5871	0.242917	6.53351	6.42449e-11	2.88039e-10
AC078842.3	41.3225	2.09684	0.414075	5.06392	4.10728e-07	1.185e-06
AC079135.1	38.9537	5.49718	0.684209	8.03435	9.40731e-16	7.3106e-15
AC079630.4	52.1359	-1.18869	0.327784	-3.62644	0.000287359	0.000576666
AC079796.1	46.3485	3.7266	0.571409	6.52178	6.94796e-11	3.10433e-10
AC079922.3	93.6714	-0.600428	0.249519	-2.40634	0.0161132	0.024659
AC083843.4	51.4875	-0.778043	0.303459	-2.56391	0.0103499	0.0163774
AC083899.3	77.8501	-0.568543	0.231604	-2.45481	0.0140961	0.0217991
AC084082.3	114.571	3.09202	0.507044	6.09814	1.07312e-09	4.19331e-09
AC087380.14	46.2439	1.47438	0.36827	4.00352	6.24058e-05	0.000136673
AC090286.2	29.1844	-0.73218	0.25888	-2.82826	0.00468024	0.00782546
AC090587.4	85.4555	-1.06791	0.193343	-5.52338	3.32535e-08	1.09391e-07
AC091133.1	90.5399	-0.534252	0.164187	-3.25392	0.00113825	0.00208397
AC091729.9	209.605	1.01111	0.231995	4.35831	1.3107e-05	3.13425e-05
AC091878.1	151.428	-5.18392	0.560034	-9.25643	2.11387e-20	2.74923e-19
AC092066.1	218.456	-0.653245	0.188961	-3.45704	0.000546149	0.00104857
AC092535.3	30.6127	-1.42687	0.510202	-2.79667	0.00516318	0.0085604
AC092675.3	143.998	4.533	0.372052	12.1838	3.79356e-34	1.66868e-32
AC092835.2	549.722	-0.404951	0.185961	-2.17761	0.0294351	0.0430432
AC093323.3	590.208	-0.676805	0.156992	-4.31109	1.62455e-05	3.83734e-05
AC093495.4	45.5097	1.10731	0.242933	4.55808	5.16234e-06	1.30272e-05
AC093616.4	159.946	1.12254	0.245547	4.57161	4.83994e-06	1.22569e-05
AC093627.9	55.0153	1.8271	0.316787	5.7676	8.04093e-09	2.84621e-08
AC093642.5	183.862	-1.17707	0.167682	-7.01966	2.22415e-12	1.18579e-11
AC093673.5	286.469	1.45202	0.21926	6.62238	3.53473e-11	1.63351e-10
AC093818.1	46.4424	0.906388	0.338353	2.67883	0.00738803	0.0119582
AC093843.1	41.2345	-5.30985	0.515551	-10.2994	7.0919e-25	1.39667e-23
AC093850.2	29.4236	6.60315	0.860561	7.67308	1.67919e-14	1.13766e-13
AC096772.6	291.502	-2.6932	0.167247	-16.1032	2.424e-58	7.07329e-56
AC097662.2	113.891	-0.536094	0.181216	-2.95831	0.00309328	0.0053175
AC097721.1	31.7586	1.85376	0.262588	7.05956	1.67027e-12	9.03043e-12
AC097721.2	69.8838	1.78872	0.204202	8.75956	1.96019e-18	2.06673e-17
AC097724.3	30.8429	1.16339	0.288702	4.02971	5.5845e-05	0.000123015
AC098614.2	53.3922	1.02597	0.286587	3.57997	0.000343634	0.000680957
AC098826.5	47.3361	-4.38169	0.689923	-6.35099	2.13929e-10	9.04898e-10
AC099850.1	44.3084	-0.384673	0.169207	-2.27338	0.023003	0.0342639
AC104058.1	54.2376	1.04913	0.217461	4.82447	1.40373e-06	3.79806e-06
AC104623.1	30.4244	-2.32363	0.506923	-4.58379	4.56615e-06	1.16019e-05
AC104692.1	25.0042	2.014	0.302914	6.64875	2.95599e-11	1.37902e-10
AC108463.2	102.351	2.29573	0.243201	9.43964	3.74066e-21	5.20477e-20
AC108488.4	75.2426	1.61008	0.208287	7.73009	1.0747e-14	7.46918e-14
AC108938.5	150.264	4.10282	0.528693	7.76029	8.47341e-15	5.94487e-14
AC109826.1	61.9236	1.57646	0.363465	4.33729	1.44249e-05	3.43156e-05
AC112721.2	13.5467	3.92374	0.900488	4.35734	1.3165e-05	3.1463e-05
AC113617.1	30.2344	-5.02384	0.741349	-6.77662	1.23023e-11	6.01414e-11
AC114271.2	124.001	-0.808965	0.1826	-4.43026	9.41208e-06	2.29546e-05
AC114765.1	55.7032	-4.37168	0.450269	-9.70905	2.75906e-22	4.28502e-21
AC114803.3	29.048	3.34449	0.703172	4.75629	1.97185e-06	5.24358e-06
AC115522.3	25.8616	-2.70216	0.318061	-8.49574	1.96681e-17	1.85981e-16
AC131056.3	78.6755	-2.7038	0.54293	-4.98001	6.35799e-07	1.7912e-06
AC132812.1	39.221	0.855578	0.207219	4.12886	3.64571e-05	8.23324e-05
AC136289.1	63.8689	-2.36298	0.24136	-9.79026	1.23981e-22	1.98504e-21
AC137723.5	28.9491	-4.09596	0.27274	-15.0178	5.61265e-51	9.45389e-49
AC137932.4	27.2512	-1.9484	0.455608	-4.27648	1.89868e-05	4.45137e-05
AC138430.4	41.6126	-3.67028	0.436135	-8.41546	3.91349e-17	3.57179e-16
AC138969.4	148.317	-1.56504	0.27399	-5.71203	1.11634e-08	3.88319e-08
AC140542.2	23.6294	-5.20596	0.738188	-7.05235	1.75915e-12	9.47389e-12
AC141928.1	76.3795	-3.09514	0.542998	-5.70009	1.19746e-08	4.15352e-08
AC144449.1	68.7573	0.755935	0.208368	3.62789	0.00028575	0.00057366
AC144833.1	70.7147	-3.86711	0.56573	-6.8356	8.16602e-12	4.07868e-11
AC145343.1	40.3108	1.15377	0.280701	4.11031	3.95126e-05	8.86722e-05
AC147651.4	38.9282	3.80251	0.390537	9.73661	2.10459e-22	3.30575e-21
AC156455.1	38.772	0.88872	0.337008	2.63709	0.00836211	0.0134143
AC159540.1	75.1159	-0.887191	0.282444	-3.14112	0.00168301	0.00300488
AC159540.14	31.8999	-2.07646	0.966771	-2.14784	0.0317268	0.0461404
AC253572.1	298.177	1.26082	0.397393	3.17272	0.00151019	0.00271245
AC253576.2	65.0414	0.665568	0.222413	2.99249	0.00276715	0.00478906
ACAA1	1831	0.511984	0.121728	4.20595	2.59984e-05	5.98417e-05
ACACA	7962.33	-0.642457	0.149721	-4.29104	1.77835e-05	4.18348e-05
ACACB	1847.94	-0.894259	0.257139	-3.47772	0.00050569	0.000975683
ACAD10	1455.81	0.65074	0.105753	6.15337	7.58516e-10	3.01457e-09
ACAD11	389.962	0.560785	0.172584	3.24934	0.00115673	0.00211482
ACAD9	2184	0.308994	0.103264	2.99227	0.00276907	0.00479118
ACADL	83.2263	-1.44974	0.360923	-4.01675	5.90055e-05	0.000129596
ACADM	1687.54	-0.489516	0.124669	-3.92653	8.6181e-05	0.000185506
ACADS	508.983	0.385615	0.162224	2.37705	0.0174518	0.0265506
ACADSB	1132.44	-2.01281	0.130186	-15.461	6.36265e-54	1.37314e-51
ACADVL	7265.89	0.418429	0.152825	2.73796	0.00618211	0.0101362
ACAN	488.235	1.30709	0.541149	2.41539	0.0157182	0.0240901
ACAP1	121.288	1.48526	0.453152	3.27763	0.00104682	0.00192748
ACAP2-IT1	88.232	-2.01294	0.378274	-5.32139	1.0298e-07	3.20207e-07
ACAT1	1610.27	-0.314599	0.125443	-2.50791	0.0121447	0.0189625
ACBD3	2173.8	0.37579	0.145283	2.58661	0.00969263	0.0153914
ACBD4	415.451	-0.842712	0.157436	-5.35272	8.66427e-08	2.7202e-07
ACBD5	2497.5	-0.788686	0.187514	-4.20601	2.59914e-05	5.98321e-05
ACBD7	496.479	-3.53658	0.410191	-8.62179	6.59131e-18	6.60662e-17
ACCS	962.911	1.23006	0.221418	5.55537	2.77024e-08	9.20068e-08
ACE	519.651	0.962423	0.249731	3.85384	0.000116281	0.000246179
ACER2	223.943	-1.58996	0.240647	-6.607	3.92176e-11	1.80397e-10
ACIN1	7043.77	0.669277	0.121274	5.51873	3.41452e-08	1.12129e-07
ACKR2	45.1286	-0.656065	0.245653	-2.6707	0.00756937	0.0122288
ACKR3	1008.16	2.06551	0.235178	8.78276	1.59515e-18	1.69132e-17
ACLY	8840.27	0.878475	0.174913	5.02237	5.10383e-07	1.45689e-06
ACO2	6487.51	-1.07151	0.14911	-7.18605	6.66948e-13	3.7733e-12
ACOT1	102.67	-0.498568	0.186658	-2.67102	0.00756219	0.0122191
ACOT11	1158.32	-1.18228	0.29004	-4.07627	4.57648e-05	0.000101843
ACOT12	67.6492	2.44708	0.407136	6.01048	1.8497e-09	7.04967e-09
ACOT13	688.197	-0.671189	0.139067	-4.82639	1.3903e-06	3.76575e-06
ACOT2	401.261	0.421041	0.174058	2.41897	0.0155646	0.0238794
ACOT4	70.5788	-1.654	0.456071	-3.62663	0.000287142	0.000576287
ACOT7	1550.31	-1.61601	0.281238	-5.74608	9.13387e-09	3.20467e-08
ACOT9	1527.38	0.436147	0.14501	3.00771	0.00263223	0.00457006
ACOX2	319.293	1.46278	0.352222	4.15301	3.28127e-05	7.45327e-05
ACP2	1784.25	0.582809	0.152498	3.82174	0.000132514	0.000278441
ACP5	467.132	5.75926	0.706642	8.15019	3.63362e-16	2.9548e-15
ACP6	1223.68	0.464314	0.209943	2.21163	0.0269925	0.039752
ACPP	139.192	2.67126	0.500608	5.33604	9.49999e-08	2.96417e-07
ACRBP	61.3096	1.70452	0.245904	6.93164	4.15998e-12	2.14768e-11
ACRC	271.122	-0.565684	0.213224	-2.653	0.00797809	0.012846
ACSF2	547.141	0.708918	0.251037	2.82395	0.00474354	0.00792426
ACSL1	3357.75	0.818288	0.326287	2.50788	0.0121458	0.0189629
ACSL3	8118.19	-0.813212	0.261065	-3.11498	0.00183957	0.0032692
ACSL4	2927.41	-0.987896	0.257783	-3.83229	0.000126958	0.000267308
ACSL6	3543.31	-3.13583	0.372214	-8.4248	3.61366e-17	3.3186e-16
ACSM3	21.3681	2.33115	0.446424	5.22183	1.77162e-07	5.34894e-07
ACSM5	245.326	1.16101	0.393624	2.94954	0.00318246	0.00546093
ACSS3	2585.05	1.12597	0.351393	3.2043	0.00135391	0.00244938
ACTA2	3496.41	2.71587	0.447727	6.06592	1.31203e-09	5.08277e-09
ACTA2-AS1	181.256	-2.624	0.357922	-7.33121	2.28084e-13	1.36771e-12
ACTB	118460	1.30073	0.176478	7.3705	1.69985e-13	1.03398e-12
ACTG1	57212.4	1.19357	0.192939	6.18626	6.16068e-10	2.47742e-09
ACTG1P12	57.1075	-3.00541	0.679346	-4.42398	9.68991e-06	2.35822e-05
ACTG1P3	123.488	0.803207	0.194886	4.12141	3.76556e-05	8.48356e-05
ACTG2	350.909	3.84455	0.636404	6.04106	1.53106e-09	5.88834e-09
ACTL6A	1077.39	2.58794	0.176768	14.6403	1.55429e-48	2.09102e-46
ACTL6B	454.445	-3.58894	0.586244	-6.12193	9.2451e-10	3.64352e-09
ACTN1	10983.8	0.983295	0.260384	3.77632	0.000159161	0.000331057
ACTN4	9662.09	0.78006	0.144625	5.39365	6.90397e-08	2.1928e-07
ACTR10	1720.1	-0.831412	0.129036	-6.44327	1.16929e-10	5.09577e-10
ACTR1A	4255.18	-1.08855	0.140047	-7.7727	7.68326e-15	5.42357e-14
ACTR1B	2697.5	-1.05824	0.155341	-6.81237	9.6006e-12	4.74375e-11
ACTR2	7813.65	-0.682505	0.171484	-3.98	6.89152e-05	0.000150198
ACTR3	7587.49	0.935734	0.176262	5.30876	1.10374e-07	3.41558e-07
ACTR3B	893.709	-1.09687	0.194495	-5.63959	1.70455e-08	5.80931e-08
ACTR3C	103.999	-1.62777	0.30737	-5.29579	1.18502e-07	3.65454e-07
ACTR6	863.598	-0.964838	0.165083	-5.84457	5.07864e-09	1.83469e-08
ACTRT3	48.254	-1.16048	0.411476	-2.82029	0.00479805	0.00800822
ACVR1	1011.56	0.506138	0.171908	2.94423	0.00323754	0.00554686
ACVR1B	1950.24	-1.41156	0.130666	-10.8028	3.33697e-27	8.2206e-26
ACVR1C	323.801	-3.78856	0.433316	-8.74318	2.26632e-18	2.3774e-17
ACVR2A	1196.19	-0.965886	0.163154	-5.92008	3.2179e-09	1.18987e-08
ACVR2B	1869.8	-0.470395	0.160251	-2.93536	0.00333166	0.00570033
ACVR2B-AS1	43.1813	-0.576793	0.252174	-2.28729	0.0221792	0.033144
ACVRL1	902.008	0.817506	0.236189	3.46124	0.000537688	0.00103395
ACY1	121.038	0.586725	0.162792	3.60415	0.000313174	0.000624541
ACYP1	343.912	-0.544642	0.222871	-2.44375	0.0145354	0.0224299
ACYP2	841.819	-0.735191	0.137431	-5.34952	8.819e-08	2.76501e-07
ADA	239.312	1.4227	0.338583	4.20191	2.64667e-05	6.08452e-05
ADAM10	5600.13	0.386402	0.151253	2.55467	0.0106288	0.0167816
ADAM11	1292.71	-3.73104	0.417187	-8.94333	3.77623e-19	4.27052e-18
ADAM12	2441.69	3.97848	0.322125	12.3507	4.8276e-35	2.29927e-33
ADAM15	2147.01	0.773716	0.182596	4.23732	2.26208e-05	5.25224e-05
ADAM17	3456.37	1.07919	0.15416	7.00045	2.55146e-12	1.35022e-11
ADAM19	2556.58	1.83485	0.342768	5.35304	8.64905e-08	2.71584e-07
ADAM22	4960.19	-1.97781	0.255263	-7.74812	9.3262e-15	6.5189e-14
ADAM23	3039.09	-1.76132	0.248255	-7.09481	1.29529e-12	7.07507e-12
ADAM28	1612.3	2.17603	0.401558	5.41896	5.99451e-08	1.91569e-07
ADAM33	848.781	1.14493	0.459023	2.49428	0.0126212	0.0196502
ADAM8	754.602	2.32778	0.48669	4.78288	1.72803e-06	4.62311e-06
ADAM9	9602.46	1.97023	0.239988	8.20971	2.21721e-16	1.84631e-15
ADAMDEC1	227.155	9.5526	0.948458	10.0717	7.3681e-24	1.33437e-22
ADAMTS1	2831.16	1.02654	0.334345	3.07029	0.00213853	0.00376017
ADAMTS12	736.356	5.16853	0.481367	10.7372	6.80709e-27	1.62289e-25
ADAMTS13	415.092	-0.987948	0.262273	-3.76687	0.000165307	0.000342998
ADAMTS14	975.658	2.70944	0.475792	5.69458	1.23679e-08	4.28706e-08
ADAMTS15	676.86	3.89965	0.364834	10.6888	1.14809e-26	2.6877e-25
ADAMTS16	119.745	-1.3503	0.40621	-3.32414	0.000886903	0.00165167
ADAMTS17	271.169	-1.86669	0.366571	-5.09229	3.53759e-07	1.02967e-06
ADAMTS18	416.481	3.01183	0.599693	5.02229	5.10588e-07	1.45728e-06
ADAMTS19	193.151	-2.66676	0.708208	-3.7655	0.000166216	0.000344676
ADAMTS2	762.807	1.42841	0.525809	2.7166	0.00659572	0.0107624
ADAMTS5	437.589	1.92317	0.322917	5.95563	2.59072e-09	9.69204e-09
ADAMTS6	886.15	2.44617	0.262733	9.3105	1.27235e-20	1.68978e-19
ADAMTS7	323.641	2.6835	0.330385	8.12235	4.57242e-16	3.67889e-15
ADAMTS7P1	62.6057	-2.52448	0.612864	-4.11914	3.80284e-05	8.55825e-05
ADAMTS8	257.842	-2.59878	0.39532	-6.57385	4.90296e-11	2.23203e-10
ADAMTS9	5992.05	2.27856	0.383558	5.94059	2.83994e-09	1.05709e-08
ADAMTSL1	629.09	1.52284	0.45381	3.35568	0.000791698	0.00148586
ADAMTSL2	652.48	-0.704539	0.278182	-2.53265	0.0113203	0.017788
ADAMTSL3	318.236	-1.25218	0.433221	-2.8904	0.00384756	0.00651522
ADAMTSL4	188.883	1.79541	0.372025	4.82605	1.39268e-06	3.7717e-06
ADAMTSL4-AS1	392.463	2.05473	0.209107	9.82621	8.6827e-23	1.412e-21
ADAP1	470.809	-2.57986	0.464178	-5.5579	2.73034e-08	9.07397e-08
ADAP2	1486.86	2.58357	0.322406	8.01343	1.11555e-15	8.60139e-15
ADARB1	1469.19	-2.00594	0.180368	-11.1214	9.87486e-29	2.7911e-27
ADARB2	635.736	-3.21451	0.528951	-6.07714	1.22348e-09	4.75572e-09
ADAT1	1428.54	0.25839	0.109357	2.3628	0.0181374	0.0275027
ADAT2	414.899	0.549553	0.139087	3.95113	7.77825e-05	0.000168303
ADAT3	72.7881	1.13091	0.278668	4.05826	4.94401e-05	0.000109621
ADCK3	1479.15	-0.393939	0.162221	-2.4284	0.0151654	0.0233222
ADCK4	1535.77	0.912539	0.149113	6.11976	9.37141e-10	3.68979e-09
ADCY1	10811.8	-2.90455	0.511845	-5.67468	1.38949e-08	4.78832e-08
ADCY10	71.1694	-0.808337	0.23134	-3.49415	0.000475573	0.000921868
ADCY2	3742.48	-2.51706	0.33925	-7.41947	1.17587e-13	7.27214e-13
ADCY3	2425.4	-0.664715	0.147649	-4.50198	6.73237e-06	1.67193e-05
ADCY5	1563.56	-2.77012	0.356136	-7.77827	7.35257e-15	5.199e-14
ADCY7	1966.1	1.2138	0.290712	4.17526	2.97645e-05	6.80265e-05
ADCY9	1726.25	-1.23377	0.126185	-9.77747	1.40684e-22	2.24725e-21
ADCYAP1	174.34	-3.6914	0.484292	-7.62227	2.49258e-14	1.66263e-13
ADD1	13319	-0.68282	0.0852328	-8.01124	1.13561e-15	8.74304e-15
ADD2	8229	-2.15858	0.393822	-5.4811	4.22679e-08	1.3713e-07
ADD3	6513.14	-1.42115	0.184926	-7.68495	1.53059e-14	1.04381e-13
ADD3-AS1	86.3773	-2.03514	0.279051	-7.29308	3.02956e-13	1.78669e-12
ADH5	3736.75	0.388688	0.107817	3.60506	0.000312085	0.000622787
ADHFE1	499.896	-0.743943	0.251914	-2.95316	0.0031454	0.00540217
ADIPOR1	2722.46	0.336697	0.139247	2.41798	0.0156068	0.0239336
ADIRF	316.653	-1.59934	0.492079	-3.25017	0.00115337	0.00210924
ADK	753.438	-0.642316	0.1393	-4.61103	4.00682e-06	1.02435e-05
ADM	2199.22	3.6957	0.496087	7.4497	9.35517e-14	5.84914e-13
ADM2	49.8303	4.99885	0.767633	6.51203	7.41426e-11	3.2942e-10
ADO	1307.71	-0.705707	0.159399	-4.42729	9.5425e-06	2.32535e-05
ADORA3	1369.07	2.32518	0.391402	5.94064	2.83904e-09	1.05695e-08
ADPGK	2408.96	1.29185	0.166619	7.75331	8.95257e-15	6.26619e-14
ADPRH	430.182	2.24757	0.228471	9.83746	7.76473e-23	1.2717e-21
ADPRHL1	143.754	-2.79133	0.305686	-9.13136	6.7644e-20	8.35688e-19
ADPRHL2	1052.08	1.04211	0.152035	6.8544	7.16117e-12	3.60635e-11
ADRA1A	416.935	-2.06197	0.479268	-4.30233	1.6901e-05	3.98629e-05
ADRA1B	133.409	-2.34296	0.363433	-6.44675	1.14271e-10	4.98307e-10
ADRA2A	96.5759	-2.81647	0.395835	-7.11527	1.11691e-12	6.1445e-12
ADRA2C	57.0192	-2.57051	0.463468	-5.54625	2.91859e-08	9.67012e-08
ADRB1	234.82	-2.93762	0.362224	-8.10996	5.06364e-16	4.05522e-15
ADRBK1	3354.14	-1.00008	0.160491	-6.23133	4.62484e-10	1.8858e-09
ADRBK2	3046.19	-2.28385	0.18858	-12.1108	9.25792e-34	3.92241e-32
ADRM1	1962.31	0.730533	0.124839	5.85181	4.86266e-09	1.76035e-08
ADSL	1750.99	0.808894	0.122678	6.59363	4.29189e-11	1.96247e-10
ADSSL1	271.919	0.841538	0.280205	3.0033	0.00267069	0.00463257
ADTRP	67.0844	-2.61142	0.560152	-4.66199	3.13172e-06	8.09621e-06
AE000661.37	47.9892	2.64269	0.513224	5.1492	2.61604e-07	7.73279e-07
AEBP1	7916.25	2.85861	0.356833	8.01106	1.13726e-15	8.75247e-15
AEBP2	1489.51	-1.10335	0.147032	-7.50416	6.18233e-14	3.9496e-13
AEN	1608.24	2.35669	0.206318	11.4226	3.22454e-30	1.03255e-28
AES	7347.49	-1.21967	0.14965	-8.15018	3.63396e-16	2.9548e-15
AF001548.5	71.0127	1.18621	0.284736	4.166	3.09984e-05	7.06751e-05
AF064858.8	36.5412	-2.74524	0.282158	-9.72944	2.25837e-22	3.53124e-21
AF064860.5	28.1027	1.35579	0.422386	3.20984	0.00132807	0.00240536
AF064860.7	35.3506	1.50726	0.418306	3.60324	0.00031428	0.000626625
AF121897.4	38.3761	-1.03957	0.342613	-3.03423	0.00241153	0.00420946
AF127936.5	98.2641	1.21556	0.382019	3.18194	0.0014629	0.00263321
AF129075.5	34.1993	0.46621	0.194534	2.39655	0.0165504	0.0252739
AF131215.6	58.2256	-0.854087	0.34308	-2.48947	0.0127935	0.0199051
AF131216.5	32.4577	-1.46497	0.574178	-2.55142	0.0107284	0.0169298
AF131217.1	86.5127	-2.57037	0.318504	-8.07014	7.02161e-16	5.54819e-15
AFAP1	4307.19	0.733134	0.25897	2.83096	0.00464079	0.00776201
AFAP1L1	1535.18	2.66837	0.293857	9.0805	1.08081e-19	1.2981e-18
AFAP1L2	1229.96	-0.763108	0.295995	-2.57811	0.00993428	0.0157534
AFF1	4403.49	0.386533	0.134608	2.87154	0.00408476	0.00688922
AFF2	326.055	-3.20881	0.632155	-5.07599	3.85474e-07	1.11602e-06
AFF3	2283.09	-1.79972	0.363004	-4.95784	7.12819e-07	1.9984e-06
AFG3L1P	1392.18	0.570098	0.144853	3.9357	8.29538e-05	0.000178894
AFG3L2	3174.54	-0.360992	0.13369	-2.70021	0.0069295	0.0112645
AFTPH	2406.08	-0.997688	0.109037	-9.14998	5.69433e-20	7.10682e-19
AGA	566.534	1.09745	0.250852	4.37487	1.21507e-05	2.92005e-05
AGAP1	7828.53	-1.24088	0.238997	-5.19203	2.08018e-07	6.22072e-07
AGAP10	274.018	-0.591058	0.250427	-2.3602	0.0182649	0.027684
AGAP1-IT1	127.875	1.16331	0.287488	4.04648	5.1993e-05	0.000115011
AGAP2	7040.47	-1.68778	0.646009	-2.61263	0.00898479	0.0143377
AGAP2-AS1	297.331	4.0522	0.425958	9.51313	1.85004e-21	2.65253e-20
AGAP3	3328.58	-1.17582	0.142225	-8.26732	1.37001e-16	1.1695e-15
AGAP4	262.728	-0.54927	0.159249	-3.44912	0.000562412	0.0010778
AGAP5	43.5451	0.592625	0.224188	2.64344	0.00820695	0.0131838
AGBL1	35.0668	-0.971514	0.426325	-2.27881	0.0226783	0.0338142
AGBL2	85.7412	2.28245	0.280487	8.13744	4.03731e-16	3.26993e-15
AGBL3	411.724	0.600579	0.209906	2.86118	0.00422074	0.00710706
AGBL4	478.47	-2.65022	0.404307	-6.55498	5.5651e-11	2.51852e-10
AGBL4-IT1	35.7515	-1.97037	0.437453	-4.50419	6.66262e-06	1.6557e-05
AGBL5	994.111	0.571392	0.160521	3.55961	0.000371407	0.000731586
AGER	123.966	0.903091	0.191472	4.71657	2.39855e-06	6.30464e-06
AGGF1	2488.9	-0.365145	0.119785	-3.04834	0.00230112	0.00402588
AGL	2545.64	-0.525027	0.181673	-2.88997	0.00385283	0.00652255
AGMAT	76.9396	-1.44867	0.288839	-5.01549	5.2899e-07	1.50627e-06
AGMO	195.844	3.87364	0.52765	7.34132	2.11505e-13	1.27309e-12
AGO1	4372.16	-0.263796	0.109875	-2.40088	0.0163555	0.0249984
AGPAT1	2143.12	-0.321785	0.108011	-2.97919	0.00289009	0.00499098
AGPAT3	4533.98	-0.782868	0.126586	-6.18447	6.23112e-10	2.50284e-09
AGPAT4-IT1	356.238	0.78815	0.237449	3.31923	0.000902647	0.00167933
AGPAT5	3972.69	1.13873	0.203657	5.59142	2.25219e-08	7.56745e-08
AGPAT6	3855.94	0.513246	0.11307	4.53918	5.64747e-06	1.4172e-05
AGRN	5828.98	0.556337	0.192828	2.88515	0.00391225	0.0066172
AGTPBP1	3757.47	-2.06883	0.263152	-7.8617	3.78954e-15	2.76449e-14
AGTRAP	752.023	2.2701	0.236402	9.60271	7.7866e-22	1.16478e-20
AHCY	3403.42	1.1494	0.138955	8.27181	1.31943e-16	1.12819e-15
AHCYL1	12136.2	-0.877482	0.232365	-3.77631	0.000159169	0.000331057
AHDC1	1872.02	-0.679348	0.280076	-2.42558	0.0152838	0.0234869
AHI1	4162.22	-1.23535	0.139938	-8.82782	1.06739e-18	1.15479e-17
AHR	4292.16	2.13701	0.354967	6.02031	1.7408e-09	6.65791e-09
AHSA1	2477.02	-0.622654	0.112097	-5.55461	2.78239e-08	9.23807e-08
AHSA2	4329.43	0.921039	0.183693	5.01402	5.33054e-07	1.51722e-06
AIF1	1025.05	2.64216	0.389448	6.78437	1.16595e-11	5.71744e-11
AIFM1	856.064	0.307973	0.130849	2.35365	0.01859	0.0281458
AIFM2	382.108	-0.524925	0.234244	-2.24093	0.0250303	0.0370678
AIFM3	712.766	-3.89962	0.493853	-7.89632	2.87258e-15	2.11719e-14
AIG1	1386.76	-0.464092	0.127694	-3.63441	0.000278618	0.000560156
AIM1	1003.59	3.35046	0.439625	7.62117	2.51381e-14	1.67517e-13
AIM2	100.482	3.17762	0.588661	5.39805	6.73693e-08	2.1427e-07
AIMP1	1216.46	0.302152	0.0963558	3.1358	0.00171388	0.00305841
AIMP1P1	34.3723	-2.14266	0.473737	-4.52289	6.10008e-06	1.5245e-05
AIMP2	749.645	1.21238	0.145691	8.32159	8.67878e-17	7.56445e-16
AJAP1	2026.76	-4.1208	0.54061	-7.62249	2.48825e-14	1.66028e-13
AJUBA	459.836	3.22717	0.27267	11.8355	2.55906e-32	9.63974e-31
AK1	378.224	-0.883116	0.227802	-3.87668	0.000105892	0.000225451
AK2	3483.6	1.35469	0.114512	11.8302	2.72537e-32	1.02476e-30
AK3P3	124.17	0.739139	0.215919	3.42322	0.000618828	0.00117926
AK5	4199.45	-4.2714	0.603091	-7.0825	1.41572e-12	7.71056e-12
AK7	55.4684	-1.7817	0.459013	-3.88159	0.000103774	0.000221283
AK9	686.948	-0.934059	0.283266	-3.29747	0.000975617	0.00180665
AKAP1	1981.4	-0.723894	0.144912	-4.9954	5.87142e-07	1.66181e-06
AKAP10	2520.76	-0.436076	0.0985972	-4.4228	9.74284e-06	2.37055e-05
AKAP11	10955.1	-2.02212	0.138967	-14.5511	5.74913e-48	7.30739e-46
AKAP13	12062.5	1.52336	0.201303	7.56749	3.80508e-14	2.48608e-13
AKAP17A	1492.56	0.763039	0.131253	5.81349	6.11838e-09	2.19157e-08
AKAP2	154.916	1.88388	0.249623	7.54691	4.4572e-14	2.88576e-13
AKAP5	1036.75	-3.32432	0.419962	-7.91577	2.45731e-15	1.82936e-14
AKAP6	10426.4	-1.68793	0.258276	-6.53537	6.34508e-11	2.84602e-10
AKAP7	896.666	-0.631492	0.288718	-2.18723	0.0287257	0.0420683
AKAP8	1565.9	0.384071	0.10487	3.66234	0.000249922	0.000506692
AKAP9	9523.83	-0.526347	0.112676	-4.67132	2.99278e-06	7.76413e-06
AKIP1	601.396	0.37792	0.106489	3.5489	0.000386845	0.000759538
AKNA	1724.59	0.743445	0.179201	4.14865	3.34436e-05	7.58744e-05
AKNAD1	99.2857	3.05801	0.466838	6.55047	5.7357e-11	2.5895e-10
AKR1A1	2061.41	1.20305	0.159422	7.54634	4.47645e-14	2.89732e-13
AKR1B1	2826.21	0.825765	0.148218	5.57127	2.52888e-08	8.43828e-08
AKR1B10	11.251	5.86075	1.01784	5.75803	8.51026e-09	2.99958e-08
AKR1B1P1	29.9688	1.26139	0.281884	4.47484	7.64676e-06	1.88467e-05
AKR1C1	152.092	-2.09645	0.372904	-5.62196	1.88802e-08	6.39358e-08
AKR1C2	62.6437	-1.8329	0.520213	-3.52336	0.000426119	0.000831136
AKR1E2	163.209	-3.21693	0.333458	-9.64719	5.05192e-22	7.69035e-21
AKR7A2	1270.42	0.579996	0.135762	4.27216	1.93586e-05	4.53342e-05
AKT1	5725.86	0.922353	0.1225	7.52944	5.09589e-14	3.28286e-13
AKT1S1	897.1	0.534564	0.138677	3.85475	0.00011585	0.000245343
AKT2	4987.36	0.437404	0.203442	2.15002	0.0315539	0.0458954
AKT3	9886.96	-2.00449	0.159594	-12.5599	3.50581e-36	1.76723e-34
AKTIP	1498.53	-1.21075	0.139923	-8.65303	5.01511e-18	5.07836e-17
AL022326.1	30.8496	1.59003	0.281564	5.64714	1.63139e-08	5.57834e-08
AL022341.3	32.1791	1.65082	0.235331	7.01488	2.30154e-12	1.22359e-11
AL022393.7	37.6664	-2.33951	0.363698	-6.43258	1.25459e-10	5.44575e-10
AL022393.9	48.9383	-1.07482	0.24787	-4.33622	1.44952e-05	3.44671e-05
AL023806.1	106.29	1.21292	0.210891	5.75142	8.84948e-09	3.11332e-08
AL031587.1	34.691	1.48158	0.244339	6.06362	1.3309e-09	5.15011e-09
AL133243.1	214.394	0.466216	0.136718	3.41006	0.000649493	0.0012327
AL133243.2	463.648	0.49363	0.123817	3.98677	6.69796e-05	0.000146195
AL133243.4	222.81	0.34868	0.158117	2.2052	0.0274398	0.0403619
AL133245.2	36.2693	0.89816	0.232472	3.86351	0.000111769	0.000237198
AL136303.1	30.8568	1.41298	0.232679	6.07265	1.25816e-09	4.88413e-09
AL139147.1	39.3298	-0.845291	0.303203	-2.78787	0.00530552	0.00878093
AL160471.6	27.5784	2.00706	0.362001	5.54436	2.95037e-08	9.7692e-08
AL365181.2	180.905	-1.70497	0.263486	-6.4708	9.74843e-11	4.27989e-10
AL365202.1	77.4666	1.06358	0.282044	3.77098	0.000162608	0.000337804
AL391994.1	30.8125	1.28356	0.227714	5.63672	1.73316e-08	5.89712e-08
AL450992.2	129.545	-1.91913	0.440945	-4.35231	1.34708e-05	3.21529e-05
AL513327.1	41.6994	1.84314	0.242303	7.60676	2.81048e-14	1.86328e-13
AL590431.1	51.7179	1.68991	0.198388	8.51819	1.62071e-17	1.54809e-16
AL662800.1	104.495	1.21612	0.267553	4.54533	5.48499e-06	1.3796e-05
AL845472.1	324.905	-0.728246	0.304291	-2.39326	0.0166996	0.0254848
ALAD	1819.69	-0.545623	0.181183	-3.01145	0.00260005	0.00451647
ALDH16A1	674.95	1.87521	0.210715	8.89927	5.62177e-19	6.25856e-18
ALDH18A1	1882.58	0.676099	0.143424	4.714	2.429e-06	6.37981e-06
ALDH1A1	1026.56	-1.64278	0.409481	-4.01186	6.0242e-05	0.000132143
ALDH1B1	826.777	0.801479	0.190314	4.21134	2.53855e-05	5.85351e-05
ALDH2	2528.12	-1.52023	0.213345	-7.12568	1.03572e-12	5.71908e-12
ALDH3A1	39.61	1.68424	0.57622	2.92291	0.00346772	0.00591407
ALDH3B1	461.067	2.7099	0.358227	7.56476	3.88568e-14	2.53474e-13
ALDH5A1	2262.7	-1.91608	0.245206	-7.81416	5.53293e-15	3.96236e-14
ALDH6A1	4009.67	-1.52344	0.17813	-8.55236	1.20597e-17	1.17137e-16
ALDH8A1	173.385	-0.832557	0.271646	-3.06486	0.00217769	0.0038261
ALDOA	25997.1	-0.641923	0.212912	-3.01496	0.00257012	0.00446673
ALDOC	8700.73	-2.59352	0.347859	-7.45567	8.94107e-14	5.60148e-13
ALG1	916.839	0.469045	0.10644	4.40665	1.0498e-05	2.54532e-05
ALG1L10P	78.0148	-1.2368	0.26866	-4.6036	4.15249e-06	1.06015e-05
ALG1L11P	64.3429	-1.91418	0.317421	-6.0304	1.6355e-09	6.27369e-09
ALG1L9P	128.061	-1.35445	0.216832	-6.24652	4.19699e-10	1.71743e-09
ALG2	962.076	0.650407	0.123038	5.28624	1.24859e-07	3.8386e-07
ALG3	514.397	1.45824	0.1963	7.42862	1.09738e-13	6.80499e-13
ALG5	645.312	0.741739	0.121265	6.11666	9.55545e-10	3.75868e-09
ALG6	672.495	0.785167	0.193159	4.06486	4.80604e-05	0.00010663
ALG8	1002.94	0.69168	0.103094	6.70921	1.95685e-11	9.32213e-11
ALKBH2	489.149	1.08884	0.159177	6.84043	7.8955e-12	3.95023e-11
ALKBH3	740.405	0.290031	0.103699	2.79686	0.00516021	0.00855684
ALKBH6	197.439	-0.472673	0.155597	-3.03781	0.00238306	0.00416187
ALKBH7	505.246	0.735625	0.201349	3.65349	0.000258701	0.000522567
ALMS1-IT1	88.6764	0.624172	0.179628	3.47481	0.000511223	0.000985899
ALMS1P	100.669	-0.864696	0.27804	-3.10997	0.00187104	0.00332085
ALOX12P2	275.168	-0.912265	0.411785	-2.21539	0.0267332	0.0394037
ALOX5	966.809	2.38645	0.386919	6.16783	6.92331e-10	2.76425e-09
ALOX5AP	1055.44	3.71234	0.42585	8.71749	2.84426e-18	2.95227e-17
ALPK1	1171.26	2.2047	0.342472	6.43761	1.21367e-10	5.27477e-10
ALPK2	680.03	6.82873	0.660655	10.3363	4.82827e-25	9.65561e-24
ALPK3	977.631	0.976446	0.253518	3.85158	0.000117357	0.000248382
ALS2	3606.82	-0.764282	0.0848975	-9.00241	2.20825e-19	2.55162e-18
ALS2CL	522.354	-1.74925	0.388544	-4.50207	6.72961e-06	1.67155e-05
ALS2CR11	50.6718	-1.34701	0.385519	-3.49401	0.000475828	0.000922103
ALX3	71.1618	3.14675	0.663393	4.74342	2.10138e-06	5.56446e-06
ALX4	55.9751	2.19025	0.636012	3.44372	0.000573766	0.00109854
ALYREF	1313.59	1.30361	0.164813	7.90962	2.58175e-15	1.91441e-14
AMD1	4623.53	-0.582456	0.192215	-3.03023	0.00244364	0.00426119
AMDHD1	37.2899	0.772653	0.364356	2.1206	0.0339556	0.049082
AMDHD2	1055.15	0.50096	0.181717	2.75681	0.00583675	0.00960872
AMER2	5416.66	-1.67168	0.478801	-3.49138	0.000480533	0.000930374
AMER3	658.79	-4.21066	0.761106	-5.53229	3.16072e-08	1.0429e-07
AMH	242.152	1.45355	0.433076	3.35635	0.000789794	0.00148309
AMICA1	238.847	2.75747	0.551367	5.00115	5.69907e-07	1.61567e-06
AMIGO1	1597.96	-2.49356	0.249735	-9.9848	1.77652e-23	3.08258e-22
AMMECR1L	1489.41	0.801325	0.0838863	9.55251	1.26597e-21	1.84318e-20
AMMECR1LP1	39.5635	-3.44632	0.551181	-6.25262	4.03619e-10	1.65456e-09
AMN1	668.765	-2.35183	0.170931	-13.759	4.49863e-43	3.77339e-41
AMOT	2468.56	-1.9126	0.304567	-6.27972	3.39174e-10	1.40344e-09
AMOTL1	4995.09	0.891896	0.195827	4.55452	5.25056e-06	1.32385e-05
AMPD2	3039.04	-0.733359	0.141281	-5.19076	2.09432e-07	6.2585e-07
AMPH	2410.53	-3.07938	0.43248	-7.12029	1.07697e-12	5.93893e-12
AMY2B	1011.86	-1.52232	0.240835	-6.32102	2.59838e-10	1.08952e-09
AMZ1	406.77	-0.83963	0.374539	-2.24177	0.0249762	0.0370008
AMZ2	2134.21	-0.646497	0.117111	-5.52039	3.38247e-08	1.11147e-07
AMZ2P1	676.095	-0.773866	0.139156	-5.56113	2.68033e-08	8.91777e-08
ANAPC11	1162.46	0.887228	0.136064	6.52065	7.00015e-11	3.12495e-10
ANAPC15	468.588	-0.465529	0.167514	-2.77905	0.00545182	0.00900868
ANAPC2	1697.87	0.318056	0.147028	2.16324	0.0305229	0.0445428
ANAPC5	6272.03	0.206419	0.0907781	2.27388	0.0229731	0.0342243
ANAPC7	2050.38	0.3123	0.116575	2.67897	0.00738485	0.011954
ANG	94.1366	2.79676	0.325372	8.59557	8.28512e-18	8.19337e-17
ANGEL2	2314.68	-0.298791	0.0958227	-3.11817	0.00181979	0.00323626
ANGPT1	401.599	1.39714	0.365257	3.82509	0.000130726	0.000274851
ANGPT2	2196.3	2.5575	0.352629	7.25266	4.08661e-13	2.37161e-12
ANGPTL2	1916.86	3.45203	0.226164	15.2634	1.34109e-52	2.64616e-50
ANGPTL4	2369.15	1.32772	0.55625	2.38692	0.0169902	0.0259017
ANGPTL6	49.5605	0.952067	0.364477	2.61214	0.00899771	0.0143561
ANK1	784.777	-2.63026	0.341453	-7.70312	1.32779e-14	9.14531e-14
ANK2	33999	-2.105	0.204834	-10.2766	8.98641e-25	1.75642e-23
ANK3	9895.55	-3.16517	0.421177	-7.51506	5.68865e-14	3.64545e-13
ANKAR	655.845	-0.473512	0.144903	-3.2678	0.00108388	0.00199165
ANKDD1A	705.649	-1.12359	0.180459	-6.22628	4.77642e-10	1.94416e-09
ANKDD1B	100.314	0.918711	0.273441	3.35982	0.000779944	0.00146499
ANKFN1	712.466	1.91314	0.31941	5.9896	2.10362e-09	7.96179e-09
ANKFY1	7545.64	0.798376	0.136247	5.85978	4.63473e-09	1.68224e-08
ANKH	3964.74	-1.44921	0.303455	-4.77569	1.79091e-06	4.7796e-06
ANKHD1	624.918	0.511382	0.138167	3.7012	0.000214584	0.000439478
ANKLE2	3797.59	0.490824	0.115881	4.2356	2.27945e-05	5.29081e-05
ANKMY1	840.976	0.315269	0.138173	2.28169	0.0225075	0.0335887
ANKMY2	1483.72	-0.898433	0.151108	-5.94565	2.75367e-09	1.02683e-08
ANKRA2	759.185	0.63652	0.134464	4.73376	2.20402e-06	5.82286e-06
ANKRD1	26.912	3.963	0.735998	5.38452	7.26382e-08	2.30356e-07
ANKRD10	7965.2	1.58012	0.214413	7.3695	1.71276e-13	1.04092e-12
ANKRD10-IT1	552.341	1.37951	0.245207	5.62588	1.84566e-08	6.26242e-08
ANKRD11	4687.95	-0.956668	0.122742	-7.79415	6.48428e-15	4.60704e-14
ANKRD12	5932.43	-1.44015	0.0968345	-14.8722	4.99111e-50	7.65969e-48
ANKRD13A	2038.52	0.561716	0.12966	4.33223	1.47606e-05	3.50379e-05
ANKRD13B	822.029	-0.820331	0.267121	-3.07102	0.00213332	0.00375196
ANKRD13C	1822.98	-0.778394	0.0949842	-8.19498	2.50632e-16	2.07398e-15
ANKRD13D	1466.79	-0.319965	0.140599	-2.27573	0.022862	0.0340685
ANKRD16	309.486	-1.26305	0.123685	-10.2118	1.75529e-24	3.33023e-23
ANKRD17	11155.8	-0.278983	0.0770048	-3.62293	0.000291283	0.000583976
ANKRD18A	243.363	-1.96574	0.768057	-2.55936	0.0104865	0.0165758
ANKRD18B	175.139	-3.94766	0.766521	-5.1501	2.60346e-07	7.69669e-07
ANKRD18CP	250.252	-2.38836	0.354171	-6.74352	1.5459e-11	7.45182e-11
ANKRD19P	163.083	-5.31161	0.562332	-9.44567	3.53139e-21	4.9235e-20
ANKRD2	27.6574	-2.81003	0.347739	-8.08087	6.43084e-16	5.1028e-15
ANKRD20A11P	91.4645	-3.12756	0.579367	-5.39823	6.7301e-08	2.14086e-07
ANKRD20A4	140.711	-1.26567	0.558479	-2.26628	0.0234345	0.0348765
ANKRD20A5P	150.105	-5.13377	0.458396	-11.1994	4.10426e-29	1.18926e-27
ANKRD20A7P	124.344	-2.00363	0.713551	-2.80797	0.00498548	0.00828923
ANKRD22	135.643	3.37138	0.578002	5.83281	5.45007e-09	1.96202e-08
ANKRD24	770.185	-3.41331	0.294286	-11.5986	4.18818e-31	1.4366e-29
ANKRD26	1873.24	-1.78672	0.128067	-13.9515	3.08087e-44	2.90134e-42
ANKRD26P3	59.3452	-4.3122	0.643719	-6.69889	2.1001e-11	9.97019e-11
ANKRD27	1652.73	-0.659258	0.122992	-5.36018	8.31371e-08	2.61768e-07
ANKRD29	295.886	-2.79623	0.397315	-7.03783	1.95256e-12	1.04719e-11
ANKRD30B	153.515	-4.22034	0.736202	-5.73259	9.89099e-09	3.45684e-08
ANKRD30BL	146.801	-3.60973	0.715482	-5.04517	4.53129e-07	1.30202e-06
ANKRD31	47.9045	-2.23793	0.411395	-5.43986	5.33227e-08	1.71464e-07
ANKRD32	959.981	-1.09638	0.196802	-5.57098	2.53306e-08	8.45089e-08
ANKRD33B	1261.21	-3.25208	0.234588	-13.8629	1.06276e-43	9.25138e-42
ANKRD34A	275.142	-3.67123	0.235031	-15.6202	5.305e-55	1.23493e-52
ANKRD34C	118.622	-6.53736	0.623058	-10.4924	9.36405e-26	1.99183e-24
ANKRD34C-AS1	64.7874	-5.4137	0.785776	-6.88963	5.5938e-12	2.84678e-11
ANKRD35	312.285	-0.829471	0.305836	-2.71214	0.00668498	0.01089
ANKRD36	4390.68	-0.441752	0.166804	-2.64833	0.00808898	0.0130114
ANKRD36B	1891.13	-0.490632	0.196563	-2.49605	0.0125585	0.0195645
ANKRD36BP2	385.307	-4.41103	0.447513	-9.85677	6.40759e-23	1.05443e-21
ANKRD39	372.218	-0.502882	0.133732	-3.76036	0.000169666	0.000351514
ANKRD40	4074.18	-0.6634	0.143213	-4.63227	3.61682e-06	9.28196e-06
ANKRD42	817.848	-1.47886	0.151533	-9.75932	1.68279e-22	2.66341e-21
ANKRD44	2518.06	1.00853	0.182011	5.54103	3.0069e-08	9.94046e-08
ANKRD44-IT1	194.869	1.44658	0.232373	6.22524	4.80823e-10	1.95634e-09
ANKRD45	171.616	-0.692934	0.308213	-2.24823	0.0245615	0.0364308
ANKRD46	1453.51	-2.03682	0.168725	-12.0718	1.48842e-33	6.19218e-32
ANKRD53	59.7937	3.09383	0.462821	6.68473	2.31353e-11	1.09284e-10
ANKRD55	53.903	-2.51771	0.495815	-5.07793	3.81562e-07	1.10531e-06
ANKRD62	46.4921	-5.19982	0.475324	-10.9395	7.45835e-28	1.94367e-26
ANKRD65	303.633	-1.41036	0.410401	-3.43653	0.000589227	0.00112679
ANKRD7	66.6137	-1.9539	0.314714	-6.2085	5.34936e-10	2.16503e-09
ANKRD9	1006.16	-1.02203	0.230002	-4.44356	8.84814e-06	2.16532e-05
ANKS1A	1980.58	-0.674823	0.108622	-6.2126	5.21152e-10	2.11296e-09
ANKS1B	3521.36	-3.43446	0.471573	-7.28299	3.26492e-13	1.91839e-12
ANKUB1	25.768	3.1166	0.602121	5.17603	2.26652e-07	6.74101e-07
ANO10	1199.3	-0.334512	0.0915669	-3.6532	0.000258993	0.000523087
ANO3	687.166	-4.61149	0.505354	-9.12527	7.15544e-20	8.80323e-19
ANO4	665.058	-2.39204	0.550632	-4.34417	1.39802e-05	3.32997e-05
ANO5	1343.88	-3.04948	0.46618	-6.54142	6.09361e-11	2.74093e-10
ANO6	5403.5	2.15373	0.233684	9.21642	3.07176e-20	3.9236e-19
ANP32A	3786.96	0.353818	0.100298	3.52766	0.000419255	0.000818827
ANP32B	1122.07	0.769256	0.204902	3.75425	0.00017386	0.000359772
ANP32E	1995.59	-0.362125	0.148549	-2.43775	0.0147789	0.0227718
ANPEP	396.358	2.78997	0.445717	6.25951	3.86198e-10	1.58692e-09
ANTXR1	4013.52	1.30734	0.195917	6.67294	2.50727e-11	1.17885e-10
ANTXR2	1239.24	2.0048	0.276329	7.25511	4.01336e-13	2.33041e-12
ANXA1	7261.44	4.47593	0.341265	13.1157	2.67664e-39	1.66032e-37
ANXA11	2856.51	-1.70583	0.23385	-7.29457	2.99619e-13	1.76852e-12
ANXA2	11803.2	4.85385	0.34178	14.2017	8.9429e-46	9.64995e-44
ANXA2P2	32.3506	4.50934	0.536887	8.39906	4.50075e-17	4.07724e-16
ANXA2R	191.127	2.27599	0.249619	9.11788	7.66087e-20	9.37495e-19
ANXA3	124.023	-2.9819	0.486422	-6.13028	8.77259e-10	3.46191e-09
ANXA4	975.462	0.606013	0.240652	2.51821	0.0117952	0.0184768
ANXA5	12368.6	2.73201	0.189176	14.4417	2.82898e-47	3.38791e-45
ANXA6	8303.04	-0.810901	0.224094	-3.61857	0.00029623	0.000593032
ANXA7	2609.87	-0.91387	0.19999	-4.56958	4.88709e-06	1.23658e-05
AOAH	755.462	2.01608	0.374962	5.37676	7.58369e-08	2.3984e-07
AOAH-IT1	26.9906	1.83653	0.432301	4.24826	2.15439e-05	5.01513e-05
AOC2	121.8	-0.583323	0.211857	-2.75338	0.0058984	0.00970559
AOX1	222.626	1.93328	0.327251	5.90763	3.47068e-09	1.27809e-08
AP000223.42	60.0208	-0.848435	0.229731	-3.69317	0.000221478	0.000452836
AP000230.1	82.3308	-1.18849	0.395494	-3.00507	0.00265522	0.00460843
AP000254.8	45.1325	0.496325	0.2281	2.17591	0.0295622	0.0432168
AP000266.7	58.7643	1.66967	0.262165	6.36878	1.90543e-10	8.10109e-10
AP000432.1	69.8988	1.4906	0.254077	5.86673	4.44466e-09	1.6175e-08
AP000473.5	189.497	1.47152	0.332246	4.429	9.46694e-06	2.30803e-05
AP000473.8	287.215	1.41193	0.355364	3.9732	7.09133e-05	0.000154246
AP000476.1	59.6485	3.31411	0.537397	6.16698	6.96063e-10	2.77809e-09
AP000577.2	62.8662	0.526468	0.193972	2.71414	0.00664478	0.0108305
AP000648.5	37.6415	-2.37927	0.573314	-4.15003	3.32433e-05	7.54365e-05
AP000654.4	42.1966	1.81109	0.413421	4.38073	1.18282e-05	2.84752e-05
AP000662.4	81.8175	0.673833	0.205356	3.28129	0.00103334	0.00190435
AP000692.9	93.22	0.542497	0.196942	2.7546	0.00587635	0.00967161
AP000695.6	27.6355	1.62909	0.419196	3.88621	0.00010182	0.000217385
AP000708.1	31.2289	-1.36573	0.357721	-3.81787	0.000134609	0.000282728
AP000857.2	56.8072	-0.814894	0.318471	-2.55877	0.0105043	0.0166002
AP000892.6	315.484	3.30611	0.501211	6.59625	4.21676e-11	1.93024e-10
AP000936.1	73.4284	0.509916	0.236287	2.15804	0.0309248	0.045088
AP000962.1	266.098	1.12577	0.251083	4.48364	7.33794e-06	1.81374e-05
AP001258.4	164.631	1.1007	0.162167	6.78745	1.14134e-11	5.60035e-11
AP001372.2	264.354	-1.50538	0.1573	-9.57013	1.06771e-21	1.57332e-20
AP001505.10	31.5743	-0.700275	0.233431	-2.99992	0.00270053	0.00468118
AP001626.2	41.813	2.08782	0.459131	4.54733	5.43299e-06	1.36752e-05
AP003972.1	28.847	-1.86302	0.638441	-2.91808	0.00352199	0.00599873
AP006222.2	60.502	-1.91075	0.479664	-3.98353	6.78994e-05	0.000148094
AP006285.2	69.3814	-2.20225	0.504453	-4.36561	1.2677e-05	3.03703e-05
AP1AR	813.784	-0.741522	0.205072	-3.61591	0.000299292	0.000598932
AP1G2	1123.41	-1.86813	0.259647	-7.19488	6.25156e-13	3.55628e-12
AP1M1	2983.85	-0.566227	0.0993362	-5.7001	1.19736e-08	4.15352e-08
AP1S1	1688.72	-0.544211	0.203415	-2.67537	0.0074647	0.0120767
AP1S3	107.291	-0.666128	0.176112	-3.7824	0.000155321	0.000323607
AP2A1	4114.06	-0.985216	0.119859	-8.21976	2.03912e-16	1.70486e-15
AP2A2	4365.48	-0.774131	0.114108	-6.78421	1.16724e-11	5.72188e-11
AP2B1	12545.1	-0.770155	0.107681	-7.15219	8.54014e-13	4.76015e-12
AP3B1	2826.81	0.678467	0.117183	5.78983	7.04583e-09	2.51076e-08
AP3B2	2066.18	-2.33936	0.35703	-6.55229	5.66597e-11	2.56025e-10
AP3D1	5747.09	-0.326027	0.130048	-2.50698	0.0121769	0.019007
AP3M2	2402.5	-1.45146	0.1441	-10.0726	7.30176e-24	1.32352e-22
AP3S1	1306.13	-0.865119	0.184913	-4.67852	2.88947e-06	7.51024e-06
AP3S2	1484.51	-0.50511	0.0738892	-6.83605	8.14086e-12	4.06807e-11
AP4M1	1059.37	1.16258	0.161729	7.18847	6.55207e-13	3.70992e-12
AP4S1	889.564	-1.56581	0.139468	-11.227	3.00552e-29	8.81987e-28
AP5B1	977.285	-0.445999	0.170427	-2.61695	0.00887196	0.0141708
AP5M1	3150.14	-1.26976	0.131115	-9.6843	3.51599e-22	5.41996e-21
AP5S1	883.045	0.243949	0.110862	2.20047	0.0277735	0.0408035
AP5Z1	1746.26	1.14619	0.154415	7.42278	1.14687e-13	7.09916e-13
APAF1	1626.66	0.822957	0.142498	5.7752	7.68609e-09	2.72859e-08
APBA1	3123.29	-2.31183	0.200285	-11.5427	8.03361e-31	2.70195e-29
APBA2	6410.68	-0.992212	0.22075	-4.49473	6.96577e-06	1.72628e-05
APBA3	677.14	0.870084	0.179667	4.84277	1.28043e-06	3.48547e-06
APBB1	5578.95	-1.77147	0.253551	-6.98664	2.81556e-12	1.48053e-11
APBB1IP	905.762	1.73805	0.352297	4.93349	8.0773e-07	2.25199e-06
APC	19637.8	-0.995299	0.169423	-5.87463	4.23784e-09	1.54495e-08
APCDD1L	43.4352	7.8099	1.0526	7.41963	1.17447e-13	7.26567e-13
APCDD1L-AS1	104.413	2.61395	0.428336	6.10257	1.04375e-09	4.08613e-09
APEX1	2667.72	0.985264	0.132891	7.41406	1.22495e-13	7.55763e-13
APEX2	546.846	1.17798	0.182264	6.46308	1.02596e-10	4.49287e-10
APH1A	3844.05	1.56289	0.130256	11.9986	3.6155e-33	1.45731e-31
API5	3631.5	-0.419002	0.122136	-3.43062	0.000602199	0.00114947
APLF	487.243	-1.14098	0.174725	-6.53011	6.57211e-11	2.94402e-10
APLN	2639.01	2.44755	0.346248	7.06876	1.56321e-12	8.46708e-12
APLNR	2923.74	2.32904	0.490281	4.75041	2.03005e-06	5.3873e-06
APLP1	5450.12	-1.94558	0.392512	-4.95674	7.16855e-07	2.00917e-06
APOBEC3A	27.1646	1.48749	0.605924	2.45491	0.0140918	0.0217942
APOBEC3B	53.1445	5.33554	0.589233	9.05506	1.36494e-19	1.61963e-18
APOBEC3C	499.345	3.55503	0.348799	10.1922	2.14792e-24	4.05288e-23
APOBEC3D	68.3231	1.72884	0.318458	5.4288	5.6735e-08	1.819e-07
APOBEC3F	124.822	2.06	0.260088	7.9204	2.36751e-15	1.76502e-14
APOBEC3G	358.511	2.67197	0.28546	9.36025	7.9545e-21	1.06806e-19
APOBR	185.653	2.67178	0.34187	7.81519	5.48781e-15	3.93277e-14
APOC1	2125.3	4.42597	0.420258	10.5316	6.18023e-26	1.34075e-24
APOC2	38.3419	2.50501	0.454171	5.51557	3.47649e-08	1.14073e-07
APOE	30266.7	2.40455	0.313936	7.65938	1.86837e-14	1.26005e-13
APOL1	744.655	1.88194	0.44644	4.21544	2.49293e-05	5.75535e-05
APOL4	938.432	2.58855	0.574251	4.50771	6.55321e-06	1.62988e-05
APOL6	4011.02	1.79295	0.324873	5.51892	3.41095e-08	1.12029e-07
APOM	61.4149	1.0661	0.204468	5.21402	1.84787e-07	5.56779e-07
APOO	570.019	-0.718079	0.156259	-4.59543	4.31855e-06	1.10092e-05
APOOL	900.651	-1.0974	0.212901	-5.15453	2.54266e-07	7.52554e-07
APP	39841.6	-0.465939	0.193897	-2.40302	0.0162601	0.0248599
APPBP2	3893.64	-0.57281	0.150804	-3.79838	0.000145645	0.000304581
APPL1	4000.91	-0.620972	0.130205	-4.7692	1.84959e-06	4.92922e-06
APPL2	2734.48	0.358506	0.106832	3.35579	0.000791382	0.00148554
APRT	902.307	1.10349	0.185824	5.93837	2.87874e-09	1.07057e-08
AQP1	8425.28	3.31368	0.523654	6.328	2.48364e-10	1.04352e-09
AQP11	130.113	-1.03302	0.218671	-4.72407	2.31165e-06	6.09091e-06
AQP3	76.2546	1.41583	0.368413	3.84304	0.00012152	0.000256589
AQP5	91.4149	2.41322	0.525832	4.58933	4.44672e-06	1.13178e-05
AQP6	86.3768	0.836244	0.388027	2.15512	0.0311527	0.0453787
AQP7P1	85.5646	1.54795	0.611472	2.53151	0.0113572	0.0178377
AQP9	556.157	1.94763	0.664357	2.93161	0.00337214	0.00576461
AQPEP	105.074	1.7284	0.39152	4.4146	1.01196e-05	2.45617e-05
AR	1016.09	1.77381	0.385135	4.60569	4.111e-06	1.04995e-05
ARAF	1266.95	1.32054	0.150048	8.8008	1.35847e-18	1.45001e-17
ARAP1	3473.51	0.566708	0.182786	3.10039	0.00193267	0.0034229
ARAP2	7484.01	-0.758957	0.260501	-2.91345	0.00357457	0.00608348
ARAP3	1854.91	1.83107	0.244012	7.50402	6.18911e-14	3.95271e-13
ARC	1819.94	2.1518	0.452739	4.75285	2.00573e-06	5.32881e-06
AREG	78.4292	5.72181	0.853999	6.70002	2.08395e-11	9.89576e-11
ARF1P2	63.0602	0.749912	0.21468	3.49316	0.000477348	0.000924876
ARF3	6655.87	-1.535	0.1642	-9.34837	8.9005e-21	1.19045e-19
ARF4	3193.78	0.848868	0.186001	4.56379	5.02386e-06	1.26963e-05
ARF6	2061.82	0.676638	0.15513	4.36176	1.29023e-05	3.08779e-05
ARFGAP1	4081.63	0.40645	0.144031	2.82197	0.00477302	0.007969
ARFGAP2	3933.8	-0.348	0.12119	-2.87152	0.00408505	0.00688922
ARFGAP3	2192.54	0.860843	0.141839	6.06915	1.28586e-09	4.98604e-09
ARFGEF2	5847.08	-0.938113	0.113422	-8.27097	1.32871e-16	1.13519e-15
ARFIP1	1333.48	0.587529	0.112773	5.20981	1.89032e-07	5.68413e-07
ARHGAP1	2871.2	0.503949	0.141016	3.5737	0.000351975	0.000696155
ARHGAP11A	1142.9	3.3677	0.278383	12.0974	1.09016e-33	4.58542e-32
ARHGAP11B	655.507	3.3599	0.264561	12.6999	5.92174e-37	3.1539e-35
ARHGAP15	466.604	2.60994	0.332455	7.85051	4.14337e-15	3.0099e-14
ARHGAP17	1560.45	0.563052	0.161363	3.48936	0.000484179	0.000937059
ARHGAP18	1713.77	2.48157	0.277089	8.95587	3.37074e-19	3.83709e-18
ARHGAP19	646.469	0.782766	0.132874	5.89105	3.83749e-09	1.40717e-08
ARHGAP19-SLIT1	98.3447	-1.78062	0.509613	-3.49405	0.000475745	0.000922029
ARHGAP20	1359.48	-1.11616	0.304391	-3.66685	0.000245559	0.000498384
ARHGAP21	16603.9	-0.804756	0.204478	-3.93566	8.29683e-05	0.000178907
ARHGAP23	2638.08	-1.04703	0.218759	-4.78621	1.69958e-06	4.55169e-06
ARHGAP24	995.545	0.899949	0.388393	2.31711	0.0204976	0.0308133
ARHGAP25	808.338	1.81896	0.287368	6.32971	2.45617e-10	1.03282e-09
ARHGAP26	5850.54	-1.99875	0.19972	-10.0078	1.40916e-23	2.46996e-22
ARHGAP26-IT1	58.3706	-0.858475	0.291299	-2.94706	0.00320812	0.00550169
ARHGAP27	885.619	0.676702	0.266412	2.54006	0.0110834	0.0174514
ARHGAP30	981.412	3.20305	0.36467	8.78341	1.58592e-18	1.68239e-17
ARHGAP31	4466.74	1.12817	0.238101	4.73821	2.15619e-06	5.70085e-06
ARHGAP32	7990.34	-2.50313	0.181783	-13.7699	3.86905e-43	3.2718e-41
ARHGAP33	875.789	-1.01237	0.216955	-4.66629	3.06691e-06	7.93857e-06
ARHGAP35	10744.1	-1.02451	0.136642	-7.49777	6.49148e-14	4.13817e-13
ARHGAP39	974.664	-1.22885	0.234267	-5.24549	1.55871e-07	4.74205e-07
ARHGAP4	1157.57	2.18338	0.315816	6.91347	4.72934e-12	2.42231e-11
ARHGAP42	1777.24	1.46681	0.228387	6.4225	1.34058e-10	5.79836e-10
ARHGAP44	1115.49	-4.1712	0.396909	-10.5092	7.83439e-26	1.68374e-24
ARHGAP5	11268.3	-1.53584	0.125137	-12.2733	1.26048e-34	5.85532e-33
ARHGAP5-AS1	126.263	-0.99766	0.32739	-3.04732	0.00230894	0.00403786
ARHGAP6	520.405	1.46585	0.280431	5.22712	1.72166e-07	5.20874e-07
ARHGDIB	2671.49	2.89996	0.31334	9.25497	2.14281e-20	2.78512e-19
ARHGDIG	914.652	-3.78925	0.553488	-6.84613	7.58725e-12	3.80335e-11
ARHGEF1	1893.62	0.743358	0.171467	4.33529	1.45567e-05	3.46053e-05
ARHGEF10L	2825.02	0.540518	0.18475	2.92567	0.00343717	0.00586633
ARHGEF11	5132.82	-0.98768	0.157473	-6.27205	3.56325e-10	1.47e-09
ARHGEF12	18435	-0.902034	0.104376	-8.64215	5.51632e-18	5.55871e-17
ARHGEF17	4251.44	-0.838838	0.184341	-4.55046	5.35286e-06	1.34817e-05
ARHGEF19	137.087	2.10581	0.469994	4.48051	7.44658e-06	1.83993e-05
ARHGEF25	2291.49	-1.34945	0.327166	-4.12465	3.71295e-05	8.37415e-05
ARHGEF26	3441.54	1.08056	0.293846	3.6773	0.000235714	0.000479953
ARHGEF3	3270.23	-0.490579	0.209859	-2.33766	0.0194047	0.0292702
ARHGEF33	163.735	-2.10824	0.185113	-11.389	4.74641e-30	1.49675e-28
ARHGEF37	977.787	-0.650035	0.288546	-2.25279	0.0242723	0.0360406
ARHGEF39	122.614	3.25442	0.383287	8.49081	2.05201e-17	1.93419e-16
ARHGEF4	5249.19	-1.03816	0.26227	-3.95834	7.54713e-05	0.000163541
ARHGEF40	4985.51	2.1008	0.184542	11.3839	5.03217e-30	1.57487e-28
ARHGEF5	30.675	1.32207	0.454168	2.91098	0.003603	0.00612714
ARHGEF6	5600.37	1.47272	0.182026	8.09076	5.92943e-16	4.72485e-15
ARHGEF7	7429.61	-0.614101	0.155499	-3.94924	7.83995e-05	0.000169585
ARHGEF7-IT1	30.5464	-1.1577	0.432884	-2.6744	0.00748638	0.0121098
ARHGEF9	5348.58	-2.30607	0.202464	-11.39	4.68986e-30	1.48343e-28
ARID1B	4439.82	-0.318898	0.129673	-2.45924	0.0139231	0.0215509
ARID2	3337.72	0.732941	0.124803	5.87279	4.28516e-09	1.5611e-08
ARID3A	395.949	0.602439	0.213299	2.82438	0.00473718	0.00791492
ARID3B	332.701	0.948598	0.219403	4.32354	1.53548e-05	3.63733e-05
ARID4A	2204.56	-0.634936	0.103067	-6.16041	7.25574e-10	2.88808e-09
ARID4B	3840.44	-0.181199	0.0805883	-2.24846	0.0245472	0.0364148
ARID5A	1272.74	1.45092	0.220274	6.58687	4.49202e-11	2.04991e-10
ARIH1	5475.2	-0.478003	0.0844651	-5.65917	1.52105e-08	5.21619e-08
ARIH2	5098.37	0.553355	0.16045	3.44878	0.000563124	0.00107906
ARIH2OS	67.9026	0.538679	0.176609	3.05012	0.00228751	0.00400343
ARL1	2451.63	-0.787062	0.161761	-4.86558	1.1412e-06	3.1266e-06
ARL11	113.455	3.10988	0.395288	7.86738	3.62155e-15	2.64941e-14
ARL13B	776.403	0.649457	0.144327	4.49989	6.79895e-06	1.68756e-05
ARL14EP	1187.92	-0.759108	0.152802	-4.96791	6.76793e-07	1.90126e-06
ARL15	560.763	-1.01152	0.190527	-5.30905	1.10195e-07	3.41158e-07
ARL2	804.441	-0.580427	0.202941	-2.86008	0.00423534	0.0071299
ARL2BP	2416.06	0.31884	0.144576	2.20534	0.0274302	0.0403507
ARL3	1012.05	-1.75241	0.138461	-12.6564	1.03116e-36	5.36773e-35
ARL4C	5427.02	0.852409	0.29396	2.89974	0.00373472	0.00633606
ARL5B	1332.09	-0.776514	0.221055	-3.51276	0.00044348	0.000863048
ARL6	503.238	-1.64437	0.153492	-10.7131	8.83908e-27	2.08337e-25
ARL6IP1	8691.95	-0.995941	0.191961	-5.18824	2.12289e-07	6.34111e-07
ARL6IP4	90.0044	0.575755	0.136697	4.21189	2.53238e-05	5.84058e-05
ARL6IP5	3914.07	-0.787972	0.245662	-3.20755	0.0013387	0.00242356
ARL6IP6	714.993	1.3441	0.128729	10.4413	1.606e-25	3.35414e-24
ARL8B	3927.77	-1.1689	0.149829	-7.80154	6.11578e-15	4.35868e-14
ARMC1	1616.53	-0.991483	0.14822	-6.68927	2.2428e-11	1.06136e-10
ARMC2	677.255	-1.5627	0.170129	-9.18542	4.09933e-20	5.18497e-19
ARMC5	521.891	-0.362974	0.126196	-2.87628	0.00402399	0.0067962
ARMC6	1296.16	0.679958	0.137463	4.9465	7.55613e-07	2.1138e-06
ARMC9	1336.38	-0.649574	0.12856	-5.05268	4.35662e-07	1.25362e-06
ARMCX1	1107.67	-0.477844	0.112919	-4.23175	2.31884e-05	5.37319e-05
ARMCX3	4371.97	-0.442405	0.174175	-2.54001	0.011085	0.0174526
ARMCX4	1788.55	-0.776977	0.165177	-4.7039	2.55237e-06	6.68607e-06
ARMCX6	467.176	1.40827	0.137297	10.2571	1.09915e-24	2.13222e-23
ARNT	2481.97	0.327733	0.135802	2.41332	0.0158079	0.0242168
ARNT2	11541.9	-1.58793	0.192926	-8.23078	1.86005e-16	1.56208e-15
ARNTL	1841.59	-0.548939	0.22057	-2.48874	0.0128198	0.0199445
ARNTL2	1271.26	-0.710701	0.266032	-2.67149	0.00755155	0.0122029
ARPC1B	2077.34	2.90456	0.309725	9.37785	6.73291e-21	9.1112e-20
ARPC2	5607.08	0.637329	0.165968	3.84008	0.000122996	0.000259468
ARPC3	3409.45	0.412089	0.181595	2.26927	0.0232517	0.0346144
ARPC4	2225.76	0.605561	0.138483	4.37281	1.22658e-05	2.94498e-05
ARPC4-TTLL3	44.1001	0.485238	0.205716	2.35877	0.0183354	0.0277889
ARPC5	4069.58	1.11256	0.207603	5.35907	8.36498e-08	2.63183e-07
ARPC5L	1016.69	-0.764847	0.137824	-5.54947	2.86536e-08	9.49984e-08
ARPIN	1951.5	0.443638	0.100866	4.39829	1.09109e-05	2.63925e-05
ARPP19	11743.4	-1.41708	0.16304	-8.69159	3.57389e-18	3.67646e-17
ARPP21	2618.19	-3.19773	0.377222	-8.47705	2.30984e-17	2.16539e-16
ARRB1	2058.39	-2.29363	0.290814	-7.88694	3.0968e-15	2.27678e-14
ARRDC1-AS1	508.042	0.521696	0.114106	4.57205	4.82981e-06	1.22358e-05
ARRDC3	5927.69	1.55201	0.232718	6.66903	2.57501e-11	1.20809e-10
ARRDC3-AS1	62.5513	0.798791	0.18743	4.26182	2.0277e-05	4.73724e-05
ARRDC4	3484.1	1.41341	0.306795	4.60702	4.08471e-06	1.04362e-05
ARSB	1384.08	0.719045	0.111117	6.47107	9.73142e-11	4.27333e-10
ARSD	1559.57	1.86879	0.186796	10.0045	1.45683e-23	2.54706e-22
ARSE	139.476	1.29869	0.251511	5.16356	2.42294e-07	7.18559e-07
ARSF	150.223	1.13593	0.46656	2.43469	0.0149046	0.0229518
ARSG	470.835	-0.688888	0.222886	-3.09076	0.00199643	0.00352828
ARSI	254.129	2.30484	0.485771	4.7447	2.08817e-06	5.53162e-06
ARSJ	1226.04	2.41038	0.336469	7.16376	7.84926e-13	4.39635e-12
ARV1	507.94	-0.619705	0.14218	-4.35858	1.30908e-05	3.13072e-05
ARVCF	1600.12	0.517536	0.227361	2.27627	0.0228296	0.03403
ARX	161.062	-1.6186	0.445569	-3.63265	0.000280523	0.000563767
ASAH1	6372.05	0.862986	0.228926	3.76971	0.000163438	0.000339459
ASAH2	46.7863	-1.35394	0.345244	-3.9217	8.79269e-05	0.000189048
ASAH2B	158.33	-1.36368	0.218875	-6.23041	4.65223e-10	1.89622e-09
ASAP3	2326.62	1.03914	0.253533	4.09863	4.156e-05	9.30351e-05
ASB1	2489.94	-0.597558	0.100113	-5.96884	2.38947e-09	8.98132e-09
ASB13	714.192	-1.18709	0.150328	-7.89667	2.86459e-15	2.11205e-14
ASB16-AS1	220.516	0.811692	0.198902	4.08087	4.48675e-05	9.99531e-05
ASB2	126.422	-3.05761	0.299812	-10.1984	2.01537e-24	3.8097e-23
ASB4	38.2545	-2.25187	0.465954	-4.83281	1.34622e-06	3.65209e-06
ASB8	1185.38	-0.595701	0.113408	-5.25274	1.49853e-07	4.56566e-07
ASB9	43.507	2.5094	0.347578	7.21968	5.21088e-13	2.98972e-12
ASCC2	1532.45	1.1373	0.127616	8.91187	5.01812e-19	5.61975e-18
ASCC3	5593.94	0.970995	0.143803	6.75228	1.45543e-11	7.04196e-11
ASF1B	388.111	6.34667	0.416781	15.2278	2.31175e-52	4.4347e-50
ASGR1	133.614	-0.744393	0.229936	-3.23739	0.0012063	0.00220058
ASH1L	13202.3	-0.983437	0.0868165	-11.3278	9.56116e-30	2.91306e-28
ASH1L-AS1	114.865	0.309364	0.145772	2.12225	0.0338169	0.0489259
ASH2L	1434.08	-0.32472	0.135104	-2.40349	0.0162396	0.0248322
ASIC2	271.884	-4.39153	0.555819	-7.90102	2.76635e-15	2.04325e-14
ASIC3	159.749	-1.01919	0.302029	-3.37448	0.000739563	0.00139445
ASIC4	1668.89	2.59831	0.528414	4.91719	8.77967e-07	2.4383e-06
ASL	850.82	0.735625	0.167311	4.39674	1.09888e-05	2.65623e-05
ASMTL-AS1	182.044	-1.20045	0.268807	-4.46582	7.9762e-06	1.96097e-05
ASNA1	1969.17	0.580336	0.145375	3.992	6.55182e-05	0.000143186
ASNSD1	1760.23	-0.336497	0.134944	-2.49361	0.0126452	0.0196862
ASPA	600.658	-1.9611	0.515818	-3.80192	0.000143578	0.00030053
ASPDH	112.625	-3.53276	0.535623	-6.59561	4.23506e-11	1.93819e-10
ASPHD1	574.055	-2.40043	0.35789	-6.70716	1.98443e-11	9.44266e-11
ASPHD2	519.848	-1.16197	0.263873	-4.40351	1.06513e-05	2.57948e-05
ASPM	2789.25	6.15564	0.411723	14.9509	1.5355e-50	2.46609e-48
ASPN	323.44	4.09206	0.595876	6.86731	6.54241e-12	3.3068e-11
ASPRV1	152.463	-0.870124	0.216164	-4.0253	5.69035e-05	0.000125271
ASRGL1	1444.51	-1.27591	0.299519	-4.25987	2.04542e-05	4.77433e-05
ASTE1	469.492	0.705618	0.0878944	8.02802	9.90575e-16	7.68066e-15
ASTN1	7009.44	-1.19008	0.221402	-5.3752	7.6496e-08	2.41739e-07
ASUN	1006.72	0.784931	0.108497	7.23461	4.66877e-13	2.68912e-12
ASXL1	5083.47	0.68507	0.118042	5.80359	6.49108e-09	2.32106e-08
ASXL3	1153.45	-1.82503	0.39389	-4.63334	3.59808e-06	9.23845e-06
ATAD1	2027.69	-1.47546	0.221033	-6.67532	2.46691e-11	1.16132e-10
ATAD2	2629.02	1.17106	0.244946	4.7809	1.74512e-06	4.6646e-06
ATAD2B	2664.51	0.646156	0.0866268	7.45907	8.71326e-14	5.46703e-13
ATAD3A	802.405	0.82612	0.170243	4.85258	1.21864e-06	3.33084e-06
ATAD3B	1309.01	0.584171	0.161559	3.61583	0.000299382	0.000599012
ATAD5	773.041	1.61947	0.332234	4.87449	1.0909e-06	2.99514e-06
ATCAY	4585.13	-2.70573	0.568143	-4.76241	1.91297e-06	5.09225e-06
ATE1	1910.97	-1.74731	0.143384	-12.1862	3.67981e-34	1.62555e-32
ATF2	3617.94	-0.808464	0.101697	-7.9497	1.86959e-15	1.40494e-14
ATF3	1458.78	3.37282	0.343676	9.81397	9.8034e-23	1.58677e-21
ATF4	6309.83	0.776104	0.146871	5.28425	1.26223e-07	3.87582e-07
ATF5	575.134	1.53514	0.318633	4.81791	1.45072e-06	3.91917e-06
ATF7	1452.49	0.424471	0.161971	2.62065	0.00877613	0.0140318
ATF7IP	7798.74	0.839265	0.146179	5.74133	9.39343e-09	3.28905e-08
ATF7IP2	368.782	-2.12866	0.308023	-6.91071	4.8223e-12	2.46748e-11
ATG13	3257.77	-0.7118	0.115934	-6.13973	8.26635e-10	3.27149e-09
ATG14	1551.72	0.307052	0.11419	2.68896	0.00716742	0.0116238
ATG2A	1507.86	-0.441232	0.17235	-2.5601	0.0104643	0.0165458
ATG2B	5034.45	-0.953863	0.0900902	-10.5879	3.39218e-26	7.54879e-25
ATG3	1560.63	0.48051	0.120427	3.99006	6.60555e-05	0.000144315
ATG4A	451.02	0.72983	0.12926	5.64624	1.63995e-08	5.603e-08
ATG4B	2403.77	-0.216889	0.100721	-2.15335	0.0312911	0.0455452
ATG4C	1023.85	-0.593871	0.129038	-4.60228	4.17882e-06	1.06648e-05
ATG5	1408.55	-0.605152	0.146325	-4.13568	3.53901e-05	8.00974e-05
ATG9A	2818.91	-0.704948	0.119588	-5.89483	3.75068e-09	1.37704e-08
ATHL1	917.917	1.46379	0.304092	4.81365	1.48201e-06	3.99976e-06
ATIC	1005.11	-0.433607	0.142942	-3.03345	0.00241776	0.00421962
ATL1	2069.97	-2.73564	0.300604	-9.10047	8.99407e-20	1.0897e-18
ATL2	1764.97	-1.00913	0.105217	-9.59096	8.72679e-22	1.29886e-20
ATL3	3985.11	1.01322	0.162639	6.22985	4.66887e-10	1.90263e-09
ATM	9651.27	0.45989	0.125858	3.65404	0.000258151	0.000521588
ATMIN	4011.72	-0.774097	0.121673	-6.3621	1.99017e-10	8.44408e-10
ATN1	2324.07	-1.6099	0.208908	-7.70629	1.29532e-14	8.93062e-14
ATP10D	2472.93	1.23435	0.193467	6.38014	1.76922e-10	7.54988e-10
ATP11A	3567.75	0.373777	0.168855	2.2136	0.0268564	0.0395683
ATP11C	1193.51	1.3815	0.199602	6.9213	4.47523e-12	2.30069e-11
ATP13A1	2138.17	0.315077	0.146009	2.15793	0.030933	0.0450904
ATP13A2	3633.39	-1.50919	0.231989	-6.50545	7.74609e-11	3.43354e-10
ATP13A3	6826.17	0.698864	0.167893	4.16257	3.14688e-05	7.16688e-05
ATP13A5	263.825	1.28685	0.536793	2.39729	0.0165168	0.0252244
ATP1A1	19141.6	-1.34909	0.218763	-6.16688	6.96501e-10	2.77879e-09
ATP1A1-AS1	166.262	1.03652	0.228416	4.53785	5.6831e-06	1.42566e-05
ATP1A2	23615.6	-1.55822	0.522157	-2.9842	0.00284322	0.00491414
ATP1A3	8188.07	-3.84314	0.58975	-6.51656	7.19389e-11	3.20247e-10
ATP1A4	42.1531	-1.53074	0.543488	-2.8165	0.00485497	0.00809475
ATP1B1	9812.49	-3.17744	0.355786	-8.93076	4.23094e-19	4.76395e-18
ATP1B1P1	111.03	0.369908	0.143233	2.58256	0.00980691	0.0155669
ATP1B2	4914.08	-1.27883	0.336047	-3.80551	0.00014151	0.000296442
ATP1B3	2606.69	0.376758	0.167144	2.25409	0.0241904	0.0359276
ATP2A1-AS1	31.7729	0.715318	0.285221	2.50795	0.0121435	0.0189625
ATP2A2	17055.1	-1.1089	0.110414	-10.0432	9.8457e-24	1.75696e-22
ATP2A3	175.629	0.952455	0.351758	2.7077	0.00677514	0.01103
ATP2B1	11756.2	-2.4355	0.203219	-11.9846	4.27953e-33	1.70835e-31
ATP2B2	8767.62	-4.39158	0.458625	-9.57553	1.01333e-21	1.49851e-20
ATP2B3	1286.95	-5.07846	0.646699	-7.85289	4.06557e-15	2.95649e-14
ATP2B4	12505.9	-0.448225	0.135943	-3.29716	0.000976686	0.00180782
ATP2C1	5769.8	-0.356179	0.12438	-2.86362	0.00418826	0.00705524
ATP2C2	81.2677	-2.9066	0.428036	-6.79056	1.11702e-11	5.48787e-11
ATP5A1	13982.6	-0.639321	0.141357	-4.52273	6.10457e-06	1.52544e-05
ATP5B	14286.3	-0.605137	0.152824	-3.95969	7.50477e-05	0.000162709
ATP5C1	2630	-0.695349	0.174953	-3.97448	7.05318e-05	0.000153495
ATP5E	4290.7	0.682935	0.166745	4.0957	4.20898e-05	9.41489e-05
ATP5F1P1	67.0729	1.34498	0.203047	6.62397	3.49674e-11	1.61745e-10
ATP5F1P5	38.0876	-0.924894	0.316771	-2.91976	0.00350305	0.00596942
ATP5G1	1027.21	-0.523671	0.153726	-3.40652	0.000657961	0.00124775
ATP5G2	3282.57	0.413669	0.156576	2.64197	0.00824251	0.0132348
ATP5G3	2543.51	-0.68118	0.230959	-2.94936	0.00318437	0.00546367
ATP5H	2281.42	-0.587821	0.130117	-4.51765	6.25307e-06	1.5601e-05
ATP5I	1646.72	-0.304587	0.127909	-2.38127	0.0172529	0.026273
ATP5J	1114.66	-0.637635	0.123864	-5.14787	2.63468e-07	7.78566e-07
ATP5L	2149.9	-0.506057	0.138022	-3.66649	0.000245901	0.00049898
ATP5O	1714.07	-0.623809	0.1355	-4.60377	4.14909e-06	1.05941e-05
ATP6AP2	5140.02	-0.545503	0.191049	-2.85531	0.00429953	0.00722856
ATP6V0A1	7449.29	-1.87345	0.11652	-16.0784	3.61882e-58	1.04132e-55
ATP6V0A2	1949.75	0.757822	0.100697	7.52577	5.24097e-14	3.37213e-13
ATP6V0C	339.773	-0.827017	0.177957	-4.64728	3.36333e-06	8.66253e-06
ATP6V0D1	3840.26	-0.726296	0.164239	-4.4222	9.7702e-06	2.37665e-05
ATP6V0D2	54.6193	5.66017	0.854704	6.62238	3.53459e-11	1.63351e-10
ATP6V0E1	2489.81	1.79458	0.200481	8.95135	3.51149e-19	3.99292e-18
ATP6V0E2	6018.72	-0.555175	0.240624	-2.30723	0.021042	0.0315653
ATP6V0E2-AS1	515.76	0.921336	0.262296	3.51258	0.00044378	0.000863551
ATP6V1A	8614.87	-2.156	0.170841	-12.6199	1.63938e-36	8.42796e-35
ATP6V1B1	115.385	5.23087	0.439201	11.91	1.05007e-32	4.07404e-31
ATP6V1B2	8899.81	-1.43293	0.211517	-6.77453	1.24813e-11	6.09732e-11
ATP6V1C1	5946.89	-1.97426	0.173767	-11.3616	6.49666e-30	2.00314e-28
ATP6V1D	2740.39	-1.33019	0.160543	-8.28561	1.1751e-16	1.01062e-15
ATP6V1E1	4236.74	-1.66955	0.215506	-7.74711	9.4008e-15	6.56883e-14
ATP6V1E2	277.4	-0.674982	0.179521	-3.7599	0.000169981	0.000352131
ATP6V1G2	1366.55	-3.58985	0.373052	-9.62292	6.39882e-22	9.66259e-21
ATP6V1H	3038.43	-1.86496	0.18082	-10.3139	6.09753e-25	1.21004e-23
ATP7A	1439.13	1.29507	0.165382	7.83079	4.84799e-15	3.4948e-14
ATP7B	585.569	-0.993887	0.222204	-4.47285	7.71841e-06	1.90075e-05
ATP8A1	6716.71	-2.74818	0.395476	-6.94905	3.67751e-12	1.91083e-11
ATP8A2	2706.03	-3.96136	0.568139	-6.97252	3.11302e-12	1.63115e-11
ATP8B3	76.0603	2.00247	0.332221	6.02751	1.66504e-09	6.37993e-09
ATP8B4	1178.83	0.888812	0.32662	2.72124	0.00650374	0.0106198
ATP9A	14912.6	-1.94131	0.213269	-9.10265	8.81533e-20	1.07055e-18
ATP9B	3179.94	-0.574002	0.0876394	-6.54959	5.76967e-11	2.60314e-10
ATPAF1	2747.62	-1.53381	0.151907	-10.0971	5.69262e-24	1.03912e-22
ATPIF1	1402.43	-0.8979	0.158055	-5.68095	1.3395e-08	4.62684e-08
ATRAID	1803.7	1.56869	0.11454	13.6956	1.07892e-42	8.73165e-41
ATRIP	36.0566	0.879177	0.260032	3.38103	0.000722148	0.00136286
ATRN	7025.41	-0.492566	0.116046	-4.24457	2.19008e-05	5.09593e-05
ATRNL1	17129.3	-4.62633	0.470368	-9.83554	7.91384e-23	1.29407e-21
ATRX	9781.52	-0.723192	0.105154	-6.87745	6.09322e-12	3.0888e-11
ATXN1	7751.04	-1.19304	0.0994734	-11.9936	3.83847e-33	1.54418e-31
ATXN10	4469.91	-0.824858	0.129911	-6.34938	2.16179e-10	9.14228e-10
ATXN2	3282.56	-0.741603	0.100929	-7.34776	2.01558e-13	1.21639e-12
ATXN2L	2622.31	-0.48636	0.167045	-2.91154	0.00359647	0.00611755
ATXN3	1721.84	-0.823583	0.107131	-7.68763	1.49891e-14	1.02383e-13
ATXN7L3	3527.29	-1.99432	0.132831	-15.014	5.94587e-51	9.9344e-49
ATXN7L3B	5752.22	-1.26042	0.127605	-9.87749	5.21211e-23	8.65954e-22
AUH	703.13	-0.73502	0.119282	-6.16206	7.18044e-10	2.8603e-09
AUP1	2772.19	1.03052	0.0851855	12.0973	1.09113e-33	4.58542e-32
AURKA	578.277	2.76745	0.250562	11.0449	2.31935e-28	6.38145e-27
AURKAPS1	45.4397	1.33425	0.221238	6.03086	1.63093e-09	6.25732e-09
AURKB	340.659	6.64378	0.4902	13.5532	7.5849e-42	5.69362e-40
AVEN	338.445	0.351714	0.122332	2.87509	0.00403913	0.00681843
AVIL	1050.32	1.71826	0.43517	3.94849	7.86461e-05	0.0001701
AVPI1	258.47	-2.00662	0.296009	-6.77894	1.21065e-11	5.92259e-11
AVPR1A	179.455	1.39539	0.429881	3.24599	0.00117043	0.00213855
AXIN2	505.149	-0.692834	0.165343	-4.19029	2.78598e-05	6.38565e-05
AXL	3153.69	0.871382	0.285046	3.05699	0.00223572	0.0039214
AZI2	1756.1	-0.64205	0.117162	-5.48	4.25318e-08	1.37942e-07
AZIN1	6892.62	-0.63217	0.139696	-4.52531	6.0306e-06	1.5086e-05
AZIN2	829.143	-0.708768	0.240085	-2.95216	0.00315563	0.00541884
B2M	37060.7	2.36044	0.290901	8.11424	4.88835e-16	3.91938e-15
B3GALNT1	1651.45	-0.801007	0.188119	-4.25799	2.06276e-05	4.81166e-05
B3GALNT2	997.937	0.531928	0.105946	5.02075	5.14689e-07	1.46797e-06
B3GALT1	817.966	-1.08963	0.365597	-2.98041	0.0028786	0.00497198
B3GALT2	724.433	-3.09209	0.482387	-6.40997	1.45545e-10	6.27555e-10
B3GALT5-AS1	98.1462	0.920363	0.409179	2.24929	0.0244939	0.0363461
B3GALT6	926.507	0.580025	0.169745	3.41704	0.000633049	0.00120392
B3GAT1	5610.08	-1.56773	0.375196	-4.17842	2.93536e-05	6.71244e-05
B3GNT4	93.0227	-3.60329	0.394876	-9.12512	7.16562e-20	8.81053e-19
B3GNT5	1135.28	3.27626	0.261137	12.5461	4.17356e-36	2.09365e-34
B3GNT7	386.733	0.934124	0.277375	3.36774	0.000757881	0.00142744
B3GNT8	24.6896	2.15177	0.454565	4.73368	2.20487e-06	5.82436e-06
B3GNT9	661.464	1.52806	0.200083	7.63713	2.22124e-14	1.48787e-13
B4GALNT1	1625.57	-1.74821	0.382248	-4.57349	4.79676e-06	1.21565e-05
B4GALNT3	410.3	-1.29897	0.399537	-3.25119	0.00114924	0.00210297
B4GALNT4	2172.05	-0.9353	0.310208	-3.01508	0.00256913	0.00446537
B4GALT1	999.23	2.4053	0.35936	6.69328	2.18218e-11	1.03385e-10
B4GALT3	935.203	0.377339	0.116465	3.23993	0.00119558	0.00218257
B4GALT4	952.008	0.804435	0.115005	6.99478	2.65668e-12	1.40125e-11
B4GALT5	5177.63	0.782389	0.185287	4.22258	2.41521e-05	5.58277e-05
B4GALT6	983.739	-3.14699	0.386864	-8.13461	4.13272e-16	3.34329e-15
B4GALT7	873.058	0.595807	0.115906	5.14042	2.74123e-07	8.08439e-07
B4GAT1	3325.4	-1.95502	0.269233	-7.26144	3.82983e-13	2.22821e-12
B9D1	431.664	-0.358511	0.15905	-2.25408	0.024191	0.0359276
B9D2	142.968	0.622138	0.175021	3.55464	0.000378496	0.000744415
BAALC-AS2	71.6173	0.955564	0.345739	2.76383	0.00571277	0.00941734
BAAT	39.7044	-2.18244	0.360328	-6.05681	1.38844e-09	5.36674e-09
BABAM1	1338.4	-0.340473	0.130084	-2.61734	0.00886189	0.0141558
BACE1	4245.12	-0.425121	0.191298	-2.22229	0.0262636	0.038775
BACE1-AS	163.28	-0.367283	0.173524	-2.11661	0.0342926	0.0495276
BACE2	1198.74	1.25558	0.381076	3.29484	0.000984775	0.0018215
BACH1	4014.02	0.638333	0.162744	3.92231	8.77036e-05	0.000188588
BACH1-IT1	114.265	1.85756	0.193478	9.60091	7.92423e-22	1.18281e-20
BACH1-IT2	127.051	2.00615	0.212522	9.4397	3.7386e-21	5.20477e-20
BACH1-IT3	44.1755	2.59779	0.271317	9.57476	1.02093e-21	1.5076e-20
BAG2	315.088	-0.899878	0.226538	-3.97231	7.11788e-05	0.000154806
BAG4	1714.88	-1.93838	0.119588	-16.2087	4.37388e-59	1.35251e-56
BAG5	3062.93	-0.291478	0.131497	-2.21661	0.0266495	0.0392887
BAHCC1	1377.67	-0.71789	0.202771	-3.5404	0.000399527	0.00078288
BAHD1	1054.53	-0.361582	0.148264	-2.43878	0.0147369	0.0227173
BAI1	2438.26	-1.0809	0.489896	-2.20639	0.0273565	0.0402537
BAI2	5091.64	-1.5173	0.257959	-5.88193	4.05516e-09	1.48148e-08
BAI3	5852.1	-2.1077	0.315479	-6.68095	2.374e-11	1.11961e-10
BAIAP2	2097.71	-1.43004	0.199949	-7.15202	8.55101e-13	4.76492e-12
BAIAP2-AS1	1266.76	-1.54874	0.172706	-8.96753	3.03244e-19	3.4634e-18
BAIAP2L2	53.7221	-2.54509	0.209305	-12.1597	5.09274e-34	2.20735e-32
BAIAP3	2381.63	-2.55193	0.400693	-6.3688	1.90511e-10	8.10109e-10
BAK1	491.28	0.913022	0.158089	5.77536	7.67895e-09	2.72652e-08
BANF1	845.188	0.858706	0.144584	5.93916	2.8649e-09	1.066e-08
BAP1	3699.97	-0.915358	0.108456	-8.43991	3.17581e-17	2.9321e-16
BARD1	1780.49	1.54111	0.166622	9.24914	2.26316e-20	2.92867e-19
BARX1	27.5481	4.18037	0.761966	5.48629	4.10461e-08	1.33311e-07
BASP1	3253.29	-2.81224	0.439115	-6.40435	1.51014e-10	6.49651e-10
BATF	47.2356	3.46219	0.529443	6.5393	6.1808e-11	2.77714e-10
BATF2	206.94	1.89474	0.507607	3.73268	0.000189451	0.000390475
BATF3	280.548	1.39759	0.232918	6.00035	1.9689e-09	7.48746e-09
BAX	1013.19	1.89905	0.149043	12.7416	3.47324e-37	1.87881e-35
BAZ1A	1972.38	1.94698	0.18709	10.4066	2.31226e-25	4.75725e-24
BAZ1B	9027.48	0.594146	0.140972	4.21464	2.50173e-05	5.77374e-05
BBIP1	628.302	-1.00116	0.130776	-7.6555	1.92554e-14	1.29734e-13
BBOX1	955.264	1.00371	0.370011	2.71265	0.0066748	0.0108743
BBS1	381.297	-0.414751	0.16961	-2.44532	0.0144723	0.0223376
BBS10	854.588	-0.474434	0.16896	-2.80796	0.00498562	0.00828923
BBS12	327.743	-0.647844	0.157808	-4.10526	4.03867e-05	9.05163e-05
BBS4	1063.48	0.253123	0.110541	2.28986	0.0220296	0.0329418
BBS7	1309.11	-1.70368	0.129025	-13.2042	8.29846e-40	5.3064e-38
BCAN	21017.6	2.57429	0.52605	4.89363	9.89946e-07	2.73208e-06
BCAP29	2765.14	-0.900654	0.151494	-5.94515	2.76206e-09	1.0294e-08
BCAS1	4652.28	-1.88514	0.737196	-2.55718	0.0105526	0.0166676
BCAS2	1148.21	-0.719657	0.157385	-4.57258	4.81754e-06	1.22077e-05
BCAS3	2138.68	-0.639715	0.108238	-5.91028	3.41523e-09	1.25879e-08
BCAS4	726.297	-2.7536	0.216786	-12.7019	5.76985e-37	3.08092e-35
BCAT1	9928.36	1.5708	0.314809	4.98968	6.04784e-07	1.7087e-06
BCDIN3D	258.476	0.713014	0.162783	4.38015	1.18599e-05	2.85415e-05
BCDIN3D-AS1	127.912	-2.27426	0.204141	-11.1406	7.95513e-29	2.27017e-27
BCHE	1546.67	3.00997	0.433123	6.94945	3.66707e-12	1.90603e-11
BCKDHA	122.314	0.388466	0.169057	2.29785	0.0215705	0.0322973
BCKDK	1390.6	0.570994	0.172095	3.31791	0.000906942	0.00168672
BCL10	583.991	0.828558	0.129634	6.39153	1.64238e-10	7.03034e-10
BCL11A	620.814	-2.97537	0.374637	-7.94201	1.98937e-15	1.49009e-14
BCL11B	411.328	-2.33609	0.367039	-6.3647	1.95668e-10	8.30876e-10
BCL2A1	206.079	3.64871	0.529525	6.89054	5.55804e-12	2.83136e-11
BCL2L11	917.607	1.8512	0.173041	10.6981	1.03939e-26	2.44428e-25
BCL2L12	162.278	2.91842	0.285927	10.2069	1.84721e-24	3.50141e-23
BCL2L13	3749.4	-0.848356	0.129114	-6.57061	5.01089e-11	2.27816e-10
BCL2L15	56.2458	-0.533168	0.216026	-2.46807	0.0135842	0.0210625
BCL2L2	3250.26	-1.94166	0.167154	-11.616	3.4187e-31	1.18173e-29
BCL3	336.134	1.97874	0.358803	5.51484	3.49102e-08	1.14532e-07
BCL6	4606.68	0.894043	0.282878	3.16052	0.00157486	0.00282127
BCL6B	433.141	1.48511	0.305219	4.86572	1.14041e-06	3.12484e-06
BCL7A	1050.52	-1.47242	0.263232	-5.59363	2.22376e-08	7.47799e-08
BCL7C	1037.15	1.36166	0.100822	13.5056	1.44952e-41	1.07639e-39
BCLAF1	6729.36	-0.404132	0.133021	-3.03811	0.00238067	0.00415804
BCO2	333.572	-1.7785	0.188843	-9.41789	4.60243e-21	6.37387e-20
BCORL1	451.875	-0.716932	0.209809	-3.41707	0.000632992	0.00120392
BCR	4229.42	-1.00954	0.205976	-4.90126	9.52228e-07	2.63571e-06
BCRP3	34.4448	-1.06108	0.300134	-3.53534	0.000407252	0.000796888
BCS1L	794.729	0.687336	0.102756	6.68901	2.24693e-11	1.06283e-10
BCYRN1	1062.21	-3.25888	0.429187	-7.59315	3.12227e-14	2.05947e-13
BDH1	1056.95	-1.70098	0.222616	-7.64089	2.15719e-14	1.44777e-13
BDKRB2	368.445	3.06194	0.398198	7.68948	1.47735e-14	1.01083e-13
BDP1	6756.6	-0.786932	0.0886931	-8.87253	7.15021e-19	7.87463e-18
BEGAIN	606.932	-1.93134	0.421129	-4.5861	4.51598e-06	1.1487e-05
BEND3	375.149	1.32236	0.205583	6.43223	1.25747e-10	5.45598e-10
BEND4	119.5	-3.11803	0.728259	-4.28149	1.85646e-05	4.35633e-05
BEND5	490.682	-0.798086	0.3182	-2.50813	0.0121372	0.0189552
BEND6	1053.91	-2.02022	0.174618	-11.5694	5.88821e-31	2.00315e-29
BEST3	991.177	3.46037	0.493849	7.00694	2.43589e-12	1.29104e-11
BET1L	1120.21	0.338249	0.152414	2.21928	0.0264676	0.0390511
BEX1	2799.47	-1.96079	0.4023	-4.87396	1.09385e-06	3.00283e-06
BEX2	1233.28	-2.65494	0.348027	-7.62854	2.37436e-14	1.58531e-13
BEX4	2430.53	-2.00445	0.211205	-9.49053	2.29866e-21	3.26414e-20
BEX5	514.385	-4.18132	0.419025	-9.97869	1.88945e-23	3.27304e-22
BFAR	1548.8	0.566864	0.110455	5.13207	2.86571e-07	8.42632e-07
BFSP1	70.6373	-1.96012	0.327633	-5.98267	2.19512e-09	8.28389e-09
BGN	2337.5	2.33208	0.419209	5.56305	2.65096e-08	8.82574e-08
BHLHB9	1415.08	-1.71137	0.198532	-8.62016	6.68618e-18	6.69523e-17
BHLHE22	103.111	-2.26965	0.797765	-2.84501	0.00444101	0.00744891
BHLHE40-AS1	50.5097	-0.663773	0.257026	-2.58251	0.00980848	0.0155682
BHMT2	96.6916	-1.2843	0.50455	-2.54544	0.010914	0.0172056
BID	993.032	0.452122	0.151005	2.99408	0.00275272	0.00476568
BIN1	4902.39	-1.09082	0.27629	-3.94808	7.87795e-05	0.000170335
BIN2	549.4	2.14443	0.33849	6.33529	2.36898e-10	9.98994e-10
BIN3	917.468	0.411898	0.114278	3.60436	0.000312926	0.000624333
BIRC3	864.77	1.70736	0.517786	3.29743	0.00097575	0.00180674
BIRC5	916.832	6.85388	0.380963	17.9909	2.29454e-72	1.90153e-69
BIRC6	18675.7	0.147998	0.0612254	2.41726	0.0156377	0.0239791
BIRC7	24.9391	3.18765	0.716035	4.45181	8.51491e-06	2.08599e-05
BIVM	1001.99	-0.551595	0.14888	-3.70496	0.000211427	0.000433526
BLCAP	2997.96	-1.00921	0.129586	-7.78795	6.81056e-15	4.82397e-14
BLID	102.535	1.91582	0.245681	7.79802	6.28859e-15	4.47414e-14
BLM	1633.4	2.63529	0.244999	10.7563	5.53499e-27	1.33497e-25
BLMH	1547.73	0.849335	0.128146	6.62788	3.40531e-11	1.57762e-10
BLNK	298.675	1.52952	0.380666	4.018	5.86936e-05	0.000128997
BLOC1S1	890.225	0.55748	0.139951	3.98339	6.79387e-05	0.000148156
BLOC1S2	1075.81	-1.09728	0.211673	-5.18387	2.17325e-07	6.48128e-07
BLOC1S4	286.509	0.767638	0.122671	6.25769	3.90718e-10	1.60422e-09
BLOC1S5	588.797	0.602409	0.149928	4.01799	5.86957e-05	0.000128997
BLOC1S6	3011.21	-0.603566	0.156786	-3.84961	0.000118305	0.00025026
BLVRB	884.112	0.584688	0.24598	2.37698	0.0174553	0.0265539
BLZF1	1116.5	-0.280257	0.125742	-2.22883	0.0258254	0.0381701
BLZF2P	54.8635	2.04221	0.417488	4.89166	9.99898e-07	2.75587e-06
BMF	520.496	2.97052	0.338643	8.77182	1.75805e-18	1.85928e-17
BMI1	1075.7	-1.05603	0.25345	-4.16663	3.09141e-05	7.04907e-05
BMP1	1692.9	2.42659	0.215375	11.2668	1.91416e-29	5.71435e-28
BMP2	347.077	1.39949	0.320172	4.37106	1.23648e-05	2.96634e-05
BMP2K	5032.34	1.05883	0.233881	4.52721	5.97667e-06	1.49565e-05
BMP3	26.1041	-5.20178	0.46427	-11.2042	3.88791e-29	1.13291e-27
BMP7	2765.91	1.16393	0.353994	3.28799	0.00100904	0.00186354
BMP8A	65.4595	-0.940861	0.365627	-2.57328	0.0100739	0.0159626
BMP8B	460.798	1.49577	0.425765	3.51313	0.000442862	0.000862008
BMPER	805.019	-1.01385	0.330566	-3.06702	0.00216203	0.00379971
BMPR2	7942.32	-1.36072	0.11669	-11.661	2.01586e-31	7.15147e-30
BMS1	2378.62	-0.413306	0.137111	-3.0144	0.0025749	0.00447428
BMS1P1	357.871	-0.762559	0.179675	-4.24411	2.19461e-05	5.1059e-05
BNC2	600.3	3.16962	0.437479	7.24521	4.31778e-13	2.49947e-12
BNIP1	364.378	0.61537	0.11763	5.23141	1.68223e-07	5.09613e-07
BNIP2	2985.36	0.689108	0.12103	5.69367	1.24335e-08	4.30908e-08
BNIP3	2729.44	-1.01964	0.287285	-3.54924	0.000386341	0.000758694
BOC	2045.25	1.4803	0.272693	5.42847	5.68408e-08	1.82211e-07
BOD1	1684.4	0.60399	0.115454	5.23143	1.68203e-07	5.09613e-07
BOD1L1	7410.3	-0.280943	0.0616771	-4.55506	5.23713e-06	1.32063e-05
BOLA1	281.943	0.278167	0.130117	2.13783	0.0325308	0.0472168
BOLA3	294.126	-0.577598	0.119655	-4.82718	1.38478e-06	3.75128e-06
BOLA3-AS1	247.364	-1.29974	0.209146	-6.21449	5.14912e-10	2.08848e-09
BOP1	1245.21	0.718194	0.1492	4.81363	1.4821e-06	3.99976e-06
BORA	267.548	2.0381	0.166158	12.2661	1.378e-34	6.37265e-33
BPGM	988.377	0.654053	0.190782	3.42827	0.000607431	0.00115871
BRAF	5113.35	-1.10288	0.136613	-8.07306	6.85593e-16	5.42348e-15
BRAFP1	97.8088	1.00181	0.22686	4.416	1.00546e-05	2.44211e-05
BRAP	1401.14	-0.195817	0.0741669	-2.64023	0.0082851	0.013299
BRAT1	2268.85	1.38135	0.16486	8.37894	5.34062e-17	4.79406e-16
BRCA1	1521.66	1.91581	0.233635	8.20001	2.40359e-16	1.9935e-15
BRCA2	962.442	4.19589	0.301633	13.9106	5.4641e-44	4.90348e-42
BRCC3	850.381	-0.274892	0.129868	-2.11671	0.0342846	0.0495196
BRCC3P1	32.7535	-1.23223	0.458595	-2.68697	0.00721027	0.0116878
BRD4	2952.41	-0.490211	0.194123	-2.52526	0.0115614	0.018131
BRD7	2823.28	0.546222	0.116249	4.69871	2.61807e-06	6.84778e-06
BRE	1139.23	-0.259888	0.101944	-2.54931	0.0107935	0.0170261
BRF1	2042.6	-0.488166	0.163999	-2.97664	0.0029143	0.00502895
BRF2	575.029	-0.247208	0.111694	-2.21326	0.0268799	0.0396003
BRI3	1326.45	1.25616	0.190463	6.59532	4.24349e-11	1.94162e-10
BRI3BP	1789.1	-1.74783	0.205786	-8.49343	2.00622e-17	1.89361e-16
BRICD5	313.034	-0.73111	0.213818	-3.41931	0.000627793	0.00119491
BRINP1	1493.68	-3.09717	0.521384	-5.94028	2.84527e-09	1.05889e-08
BRINP2	2058.65	-1.27342	0.305286	-4.17122	3.02978e-05	6.91765e-05
BRIP1	725.121	2.68453	0.366855	7.31767	2.52304e-13	1.50338e-12
BRIX1	752.81	0.377892	0.130267	2.9009	0.00372091	0.00631574
BRMS1	873.785	1.17391	0.0982888	11.9435	7.02072e-33	2.76006e-31
BRMS1L	607.296	-1.17234	0.169156	-6.93054	4.19227e-12	2.16327e-11
BRPF1	1273.01	0.520101	0.116539	4.46287	8.08684e-06	1.98699e-05
BRPF3	1784.7	-0.940302	0.155004	-6.06629	1.309e-09	5.07293e-09
BRSK1	3288.34	-2.39937	0.225856	-10.6235	2.31789e-26	5.26558e-25
BRSK2	1562.52	-2.45852	0.452619	-5.43177	5.57985e-08	1.78953e-07
BRWD1	9966.88	-0.692581	0.0925622	-7.48233	7.3015e-14	4.61337e-13
BSCL2	490.045	-1.60916	0.196354	-8.1952	2.50175e-16	2.07159e-15
BSDC1	3801.58	-0.228689	0.0957357	-2.38875	0.0169058	0.0257824
BSN	8968.75	-4.32416	0.418959	-10.3212	5.65166e-25	1.12479e-23
BSN-AS2	44.676	-0.758191	0.295203	-2.56837	0.0102179	0.0161784
BSPRY	39.2756	-2.90625	0.488808	-5.94558	2.7548e-09	1.02706e-08
BST1	131.852	1.59563	0.318945	5.00283	5.64941e-07	1.60269e-06
BST2	1762.46	2.34967	0.392138	5.99194	2.07358e-09	7.85812e-09
BTBD1	3946.12	-0.510504	0.133843	-3.81421	0.00013662	0.000286747
BTBD10	2653.18	-1.52481	0.150098	-10.1587	3.02947e-24	5.65956e-23
BTBD17	230.163	2.88165	0.593906	4.85203	1.22204e-06	3.33792e-06
BTBD19	453.678	1.90464	0.330014	5.77138	7.86258e-09	2.7879e-08
BTBD2	2989.65	-0.568877	0.163369	-3.48216	0.000497391	0.000960475
BTBD3	5353.2	-1.14048	0.249284	-4.57502	4.7617e-06	1.20735e-05
BTBD6	1546	-0.877036	0.164226	-5.34041	9.2736e-08	2.89877e-07
BTBD8	226.902	-1.94144	0.181127	-10.7186	8.32164e-27	1.96588e-25
BTBD9	2968.31	-1.92196	0.0965134	-19.914	3.07966e-88	1.06341e-84
BTF3	4803.13	0.568558	0.139367	4.07958	4.51181e-05	0.00010049
BTF3L4	1766.33	-0.464047	0.159915	-2.90184	0.00370976	0.00629836
BTF3L4P2	27.5817	1.88841	0.257736	7.32694	2.35465e-13	1.40871e-12
BTG1	2755.27	1.46047	0.174906	8.35007	6.82196e-17	6.04006e-16
BTG2	3497.81	2.28907	0.271493	8.43139	3.41586e-17	3.14532e-16
BTG3	831.039	2.37762	0.185649	12.8071	1.49664e-37	8.29072e-36
BTK	496.003	2.6613	0.367393	7.24376	4.36428e-13	2.52497e-12
BTN2A1	1475.27	0.498154	0.101963	4.88565	1.0309e-06	2.83831e-06
BTN2A2	740.181	2.21099	0.224968	9.82801	8.52833e-23	1.38907e-21
BTN2A3P	330.63	2.76697	0.279998	9.88211	4.97747e-23	8.29187e-22
BTN3A1	1989.33	1.54467	0.313651	4.92482	8.44401e-07	2.34886e-06
BTN3A2	2142.68	2.0419	0.386072	5.2889	1.23051e-07	3.78752e-07
BTN3A3	1391.68	1.05308	0.277531	3.79446	0.000147966	0.000309153
BTNL9	296.56	-1.45091	0.479118	-3.0283	0.00245934	0.0042875
BTRC	2609.6	-1.88613	0.14715	-12.8177	1.30473e-37	7.247e-36
BUB1	1120.46	5.598	0.339922	16.4685	6.18027e-61	2.17022e-58
BUB1B	893.551	4.83402	0.338578	14.2774	3.02573e-46	3.31678e-44
BUD13	741.154	0.618847	0.133756	4.6267	3.7154e-06	9.53024e-06
BUD31	1755.79	0.898064	0.153022	5.86886	4.38811e-09	1.59805e-08
BVES	514.66	0.977116	0.416468	2.3462	0.0189661	0.0286817
BX255923.3	46.9339	-1.82751	0.447616	-4.08275	4.45052e-05	9.9178e-05
BX322557.10	601.328	-0.669822	0.163611	-4.094	4.24002e-05	9.47725e-05
BYSL	458.576	1.16083	0.143723	8.07682	6.64759e-16	5.26471e-15
BZRAP1	3627.32	-3.04408	0.328359	-9.27059	1.85111e-20	2.43192e-19
BZRAP1-AS1	94.5849	-1.74302	0.208797	-8.34789	6.94904e-17	6.14207e-16
BZW1	5122.98	0.664971	0.14295	4.65176	3.29107e-06	8.48908e-06
BZW2	1426.75	0.462024	0.18383	2.51332	0.01196	0.0187123
C10orf10	3369.84	1.03413	0.404239	2.55821	0.0105212	0.0166231
C10orf107	110.345	-0.931834	0.400692	-2.32556	0.020042	0.0301678
C10orf11	386.262	0.980038	0.28934	3.38715	0.000706238	0.00133429
C10orf113	55.9591	-1.80294	0.327284	-5.50878	3.61337e-08	1.18303e-07
C10orf25	97.4994	0.591127	0.204669	2.88821	0.00387438	0.00655635
C10orf32	522.099	-1.26267	0.234846	-5.37659	7.59107e-08	2.40036e-07
C10orf35	191.311	-2.50904	0.343524	-7.30381	2.79732e-13	1.65869e-12
C10orf76	1242.95	-0.636325	0.117957	-5.39457	6.86882e-08	2.18197e-07
C10orf88	379.833	-1.10327	0.120414	-9.16231	5.07995e-20	6.3747e-19
C11orf1	233.211	-0.616298	0.121871	-5.05697	4.25961e-07	1.22656e-06
C11orf24	813.629	1.14009	0.165199	6.90134	5.15131e-12	2.63064e-11
C11orf39	34.3148	-1.88399	0.644943	-2.92117	0.00348725	0.00594444
C11orf45	109.176	0.80885	0.261761	3.09004	0.00200131	0.00353539
C11orf49	2134.29	-0.991183	0.159326	-6.2211	4.93666e-10	2.00702e-09
C11orf57	1317.51	0.323891	0.118146	2.74145	0.0061168	0.0100371
C11orf63	291.121	-0.612612	0.221755	-2.76256	0.00573494	0.00945163
C11orf68	835.891	-0.545303	0.16056	-3.39626	0.000683145	0.00129255
C11orf74	359.139	-1.0989	0.124778	-8.80687	1.28684e-18	1.37852e-17
C11orf80	583.526	-0.820671	0.250193	-3.28015	0.00103753	0.00191157
C11orf87	1545.27	-4.1881	0.723507	-5.78861	7.0973e-09	2.52736e-08
C11orf95	1320.13	-0.555223	0.238967	-2.32343	0.020156	0.0303372
C11orf96	733.131	2.09297	0.282847	7.39966	1.36533e-13	8.3813e-13
C12orf10	830.779	-0.32744	0.139061	-2.35465	0.01854	0.0280722
C12orf29	806.036	-1.49523	0.13943	-10.7239	7.86212e-27	1.86157e-25
C12orf4	1469.44	-0.292303	0.101981	-2.86624	0.00415375	0.00700052
C12orf43	884.854	-1.08029	0.091319	-11.8299	2.73495e-32	1.0265e-30
C12orf45	366.299	-0.335901	0.155996	-2.15327	0.0312977	0.0455483
C12orf66	516.374	-0.531027	0.146688	-3.62012	0.000294465	0.000589671
C12orf75	203.274	1.05916	0.248765	4.25769	2.06551e-05	4.81688e-05
C12orf76	1213.73	-1.22458	0.187803	-6.52056	7.00431e-11	3.12614e-10
C12orf79	87.4561	1.55087	0.328812	4.71659	2.39833e-06	6.30464e-06
C14orf119	1105.52	0.844528	0.143027	5.90469	3.53307e-09	1.30015e-08
C14orf132	6815.57	-2.01549	0.295335	-6.8244	8.82911e-12	4.3845e-11
C14orf159	2321.43	-0.613742	0.167308	-3.66834	0.000244133	0.000495828
C14orf169	366.559	-0.664336	0.203944	-3.25745	0.00112418	0.00206004
C14orf2	1483.84	-1.27519	0.148715	-8.57474	9.93078e-18	9.76024e-17
C14orf28	138.55	-0.694551	0.167861	-4.13765	3.50877e-05	7.94737e-05
C14orf37	2081.45	-0.984677	0.177083	-5.56055	2.68931e-08	8.94622e-08
C14orf80	406.099	0.865688	0.215722	4.01298	5.99564e-05	0.000131573
C14orf93	307.993	1.15055	0.134696	8.54189	1.32048e-17	1.27542e-16
C15orf27	119.196	-3.84463	0.261244	-14.7166	5.04387e-49	7.20682e-47
C15orf39	604.234	1.16089	0.260332	4.45926	8.22445e-06	2.01913e-05
C15orf40	898.057	-0.501739	0.104391	-4.80635	1.53714e-06	4.14074e-06
C15orf41	540.791	0.805864	0.149253	5.39933	6.6892e-08	2.12883e-07
C15orf48	48.9189	3.90433	0.51686	7.55395	4.22264e-14	2.74247e-13
C15orf52	984.191	1.5805	0.250698	6.30439	2.89337e-10	1.20979e-09
C15orf57	804.48	-0.346639	0.110863	-3.12672	0.00176768	0.00314818
C15orf59	1867.89	-1.48957	0.327786	-4.54435	5.51063e-06	1.38538e-05
C15orf61	285.989	-1.77516	0.153134	-11.5923	4.5108e-31	1.54471e-29
C15orf65	31.7707	-0.741583	0.178802	-4.1475	3.3612e-05	7.62315e-05
C16orf45	3583.08	-1.44983	0.209316	-6.9265	4.31387e-12	2.22215e-11
C16orf46	121.402	-1.42247	0.153585	-9.26179	2.0103e-20	2.62772e-19
C16orf52	1286.89	-1.83947	0.204796	-8.98195	2.66001e-19	3.04812e-18
C16orf54	70.7813	2.57146	0.421263	6.10416	1.03345e-09	4.04669e-09
C16orf59	202.526	1.01635	0.328121	3.09748	0.00195176	0.00345494
C16orf62	3116.48	-0.289408	0.131226	-2.20541	0.0274255	0.0403466
C16orf70	1041.98	-0.558032	0.113351	-4.92305	8.52062e-07	2.36985e-06
C16orf72	4863.78	-0.281485	0.117128	-2.40322	0.0162516	0.0248487
C16orf87	574.79	-0.903202	0.204268	-4.42164	9.79528e-06	2.38247e-05
C16orf96	43.2733	-0.605087	0.263612	-2.29537	0.0217117	0.0324899
C17orf102	82.2701	-3.41668	0.506227	-6.7493	1.48564e-11	7.17972e-11
C17orf107	174.883	-2.5708	0.318757	-8.06508	7.31853e-16	5.76522e-15
C17orf49	66.8476	0.488678	0.162127	3.01417	0.00257679	0.00447719
C17orf51	1267.04	-1.61402	0.185552	-8.69848	3.36358e-18	3.467e-17
C17orf53	149.808	2.81805	0.282011	9.9927	1.64058e-23	2.84909e-22
C17orf62	2479.77	1.09038	0.123129	8.85563	8.32109e-19	9.09743e-18
C17orf67	61.6759	-1.48732	0.276576	-5.37761	7.54819e-08	2.3879e-07
C17orf70	1489.95	1.35043	0.164337	8.21747	2.07837e-16	1.73698e-15
C17orf75	841.995	-1.36612	0.144765	-9.43686	3.84119e-21	5.33389e-20
C17orf82	24.7218	3.36359	0.388921	8.64851	5.21749e-18	5.27813e-17
C17orf85	2920.69	0.315419	0.123238	2.55944	0.0104842	0.0165747
C17orf96	313.386	-2.53653	0.278353	-9.11263	8.04053e-20	9.81058e-19
C17orf97	155.88	-1.16366	0.266722	-4.36282	1.28395e-05	3.07452e-05
C18orf15	104.705	0.64048	0.272472	2.35063	0.0187418	0.0283653
C18orf25	2112.89	-0.47473	0.0913813	-5.19504	2.04676e-07	6.12785e-07
C18orf32	496.467	-0.473673	0.0938073	-5.04943	4.43131e-07	1.2744e-06
C18orf54	474.217	1.26224	0.268588	4.69956	2.60725e-06	6.82119e-06
C19orf12	1532.9	-0.809915	0.11281	-7.17945	6.99942e-13	3.95351e-12
C19orf18	103.13	1.44966	0.28359	5.11182	3.19072e-07	9.33824e-07
C19orf24	471.266	1.29605	0.154021	8.41476	3.93702e-17	3.5901e-16
C19orf38	87.6411	1.53268	0.326132	4.69956	2.60716e-06	6.82119e-06
C19orf40	88.467	2.08644	0.228112	9.14658	5.87665e-20	7.30369e-19
C19orf43	2193.56	0.577205	0.134518	4.29091	1.77941e-05	4.18548e-05
C19orf44	465.294	0.509228	0.210978	2.41366	0.0157933	0.0241981
C19orf48	1289.23	2.44927	0.225462	10.8633	1.72349e-27	4.34396e-26
C19orf53	1109.55	0.544635	0.148129	3.67677	0.000236202	0.0004809
C19orf54	194.672	1.42132	0.224408	6.33362	2.3948e-10	1.00865e-09
C19orf57	366.686	1.16423	0.317603	3.66569	0.00024667	0.000500393
C19orf68	268.656	-0.619322	0.244036	-2.53782	0.0111544	0.0175552
C1D	425.003	-0.846346	0.137486	-6.15585	7.46742e-10	2.96891e-09
C1GALT1C1	521.818	0.530102	0.166271	3.18817	0.00143176	0.00258098
C1orf101	133.91	-1.23584	0.174401	-7.08623	1.37818e-12	7.51794e-12
C1orf106	190.661	2.37776	0.334144	7.11598	1.11117e-12	6.11616e-12
C1orf109	784.808	0.292227	0.129935	2.24902	0.0245114	0.0363668
C1orf110	33.5852	-1.67819	0.641584	-2.6157	0.00890455	0.0142185
C1orf112	767.929	1.62765	0.217084	7.49778	6.49097e-14	4.13817e-13
C1orf115	2008.38	-4.26461	0.359115	-11.8753	1.59002e-32	6.07787e-31
C1orf131	444.274	0.824515	0.0750637	10.9842	4.55243e-28	1.2123e-26
C1orf132	3263.35	-1.59672	0.207979	-7.67731	1.62458e-14	1.10391e-13
C1orf145	33.9989	-2.349	0.443863	-5.29217	1.20871e-07	3.72263e-07
C1orf162	486.097	1.53542	0.307761	4.98901	6.06905e-07	1.71423e-06
C1orf174	640.854	0.40045	0.128548	3.11518	0.00183833	0.00326726
C1orf204	173.561	-2.0953	0.216104	-9.69578	3.14227e-22	4.85833e-21
C1orf21	4902.29	-1.58113	0.236948	-6.67289	2.50814e-11	1.17885e-10
C1orf216	2603.02	-1.71545	0.218417	-7.85402	4.02895e-15	2.93192e-14
C1orf220	116.651	-0.647326	0.258444	-2.5047	0.0122554	0.0191239
C1orf226	769.098	2.76784	0.299184	9.25129	2.21793e-20	2.87373e-19
C1orf228	136.73	-0.862896	0.236506	-3.64851	0.000263768	0.000532107
C1orf229	25.7966	1.90261	0.313171	6.0753	1.23753e-09	4.80853e-09
C1orf233	230.828	-1.76567	0.423254	-4.17165	3.02402e-05	6.90527e-05
C1orf35	473.311	0.417664	0.170168	2.45442	0.0141114	0.0218195
C1orf52	923.917	-0.668741	0.114251	-5.85328	4.81966e-09	1.74631e-08
C1orf53	37.425	0.558796	0.252136	2.21625	0.0266746	0.0393202
C1orf54	458.785	1.35994	0.27847	4.88363	1.04153e-06	2.86603e-06
C1orf56	161.447	0.800622	0.17827	4.49106	7.08689e-06	1.75545e-05
C1orf61	27630.8	1.82028	0.474906	3.83294	0.000126622	0.000266682
C1orf64	147.784	-1.28646	0.351354	-3.66143	0.000250809	0.000508241
C1orf86	737.286	1.17811	0.161875	7.27789	3.3907e-13	1.98723e-12
C1orf94	78.2573	2.09666	0.412466	5.08324	3.71042e-07	1.07679e-06
C1orf95	1661.28	-2.44055	0.402484	-6.06371	1.33016e-09	5.1482e-09
C1QA	5382.63	3.91511	0.42797	9.14808	5.79563e-20	7.21598e-19
C1QB	8130.68	3.36888	0.431429	7.80866	5.77977e-15	4.132e-14
C1QC	5177.74	3.16949	0.408043	7.76753	8.00283e-15	5.6338e-14
C1QL1	1048.59	2.55065	0.462611	5.51359	3.51583e-08	1.15309e-07
C1QL2	74.5774	-2.92642	0.547082	-5.34914	8.83715e-08	2.77029e-07
C1QL3	681.92	-4.7566	0.688121	-6.91245	4.76357e-12	2.43924e-11
C1QL4	134.334	5.11235	0.777548	6.57496	4.86653e-11	2.2169e-10
C1QTNF1	1257.71	2.49009	0.362598	6.86737	6.53969e-12	3.30623e-11
C1QTNF3	315.509	0.681496	0.214178	3.18192	0.00146302	0.00263321
C1QTNF4	171.394	-3.25933	0.48834	-6.67429	2.48424e-11	1.16867e-10
C1QTNF6	734.167	1.59605	0.297234	5.36968	7.88761e-08	2.49033e-07
C1R	6309.95	3.52755	0.355867	9.91255	3.67151e-23	6.2095e-22
C1RL	1425.33	1.48015	0.263666	5.61372	1.98025e-08	6.68734e-08
C1S	6381.35	2.65912	0.369192	7.20253	5.91051e-13	3.37153e-12
C2	538.448	2.42587	0.395813	6.12883	8.85302e-10	3.49299e-09
C20orf194	4299.05	-0.826862	0.122305	-6.76063	1.3739e-11	6.66461e-11
C20orf197	31.8922	1.58694	0.384815	4.1239	3.72507e-05	8.39873e-05
C20orf203	73.6867	-2.88692	0.326416	-8.84431	9.20927e-19	1.00209e-17
C20orf24	473.02	0.709992	0.146278	4.85371	1.21172e-06	3.31413e-06
C20orf27	944.863	0.394293	0.162452	2.42714	0.0152186	0.0233946
C21orf2	690.264	-0.343031	0.156968	-2.18536	0.0288624	0.0422504
C21orf58	559.58	2.10978	0.358041	5.89257	3.80241e-09	1.39505e-08
C21orf62	1226.18	5.58908	0.429236	13.021	9.29477e-39	5.53737e-37
C22orf24	39.6883	-3.3782	0.327195	-10.3247	5.44756e-25	1.08626e-23
C22orf29	1492.2	-1.01404	0.135007	-7.51102	5.86678e-14	3.7546e-13
C22orf34	114.552	1.14677	0.31905	3.59433	0.00032523	0.000646465
C22orf39	1204.33	-0.688931	0.156188	-4.4109	1.02942e-05	2.49737e-05
C2CD2	1801.54	-0.68787	0.214847	-3.20167	0.00136632	0.0024701
C2CD2L	1067.86	-2.06354	0.151842	-13.5901	4.58523e-42	3.47973e-40
C2CD4A	27.7338	2.19338	0.708577	3.09547	0.00196499	0.00347746
C2CD4C	338.285	-2.72767	0.361406	-7.54738	4.44101e-14	2.87798e-13
C2CD5	3244.98	-1.15351	0.13207	-8.7341	2.45613e-18	2.56742e-17
C2orf15	67.5299	-1.55347	0.196702	-7.89756	2.84408e-15	2.09767e-14
C2orf16	32.2351	-1.65304	0.353892	-4.67101	2.99718e-06	7.7736e-06
C2orf27A	363.035	0.602425	0.262059	2.29881	0.0215157	0.0322315
C2orf42	636.157	-0.18975	0.0727257	-2.60912	0.00907767	0.0144748
C2orf43	927.342	0.685185	0.158151	4.33248	1.47439e-05	3.50062e-05
C2orf44	705.23	0.824837	0.13348	6.17948	6.43117e-10	2.57969e-09
C2orf47	382.025	-0.335969	0.0963476	-3.48705	0.000488373	0.000944206
C2orf48	42.1109	1.04348	0.490937	2.12549	0.0335457	0.0485709
C2orf49	1159.74	-0.304526	0.111101	-2.74099	0.00612546	0.0100497
C2orf50	138.974	-1.39906	0.381572	-3.66658	0.000245817	0.000498858
C2orf61	30.8641	1.83359	0.298758	6.13738	8.38955e-10	3.31707e-09
C2orf66	66.542	3.01291	0.406332	7.4149	1.21717e-13	7.51189e-13
C2orf68	1013.46	1.65512	0.12728	13.0038	1.16376e-38	6.8888e-37
C2orf69	925.778	-1.25754	0.159903	-7.86436	3.70983e-15	2.70921e-14
C2orf73	28.6778	-1.59594	0.277081	-5.75984	8.41938e-09	2.97058e-08
C2orf74	151.867	-1.2877	0.22821	-5.64261	1.6749e-08	5.71296e-08
C2orf80	606.987	-1.28252	0.510956	-2.51004	0.0120719	0.0188688
C2orf91	26.23	2.83625	0.62078	4.56885	4.90415e-06	1.24074e-05
C3	38815.1	3.26296	0.429116	7.60391	2.87309e-14	1.90175e-13
C3AR1	1152.7	3.40104	0.375735	9.05171	1.40745e-19	1.66817e-18
C3orf14	591.153	-2.06629	0.339954	-6.07814	1.21585e-09	4.72784e-09
C3orf18	825.053	-1.00155	0.167139	-5.99234	2.06838e-09	7.83987e-09
C3orf33	190.923	-1.50064	0.121361	-12.3651	4.03658e-35	1.93588e-33
C3orf58	1354.8	-0.751625	0.199717	-3.76345	0.000167583	0.000347381
C3orf62	460.642	-0.309147	0.121885	-2.53638	0.0112005	0.0176185
C3orf80	238.198	-3.77252	0.431769	-8.73736	2.38622e-18	2.49559e-17
C4A	939.888	2.56766	0.391013	6.5667	5.14437e-11	2.3373e-10
C4B	883.894	2.33548	0.435309	5.36511	8.09006e-08	2.55114e-07
C4orf27	573.627	-0.475047	0.142034	-3.34459	0.000824054	0.0015417
C4orf29	784.81	-0.369622	0.10802	-3.4218	0.000622073	0.00118501
C4orf3	3371.1	-0.725734	0.164361	-4.41548	1.00787e-05	2.44766e-05
C4orf32	94.9458	-0.827488	0.32366	-2.55666	0.0105682	0.016691
C4orf33	472.103	-0.534883	0.182925	-2.92405	0.00345513	0.00589454
C4orf36	193.081	-0.320971	0.126997	-2.52739	0.0114912	0.0180292
C4orf46	354.018	1.28859	0.212982	6.05022	1.44645e-09	5.57846e-09
C4orf47	140.071	0.709425	0.244415	2.90254	0.00370144	0.00628475
C4orf48	219.062	0.947395	0.268776	3.52485	0.00042372	0.000826847
C4orf50	553.04	-4.67082	0.62307	-7.49646	6.55656e-14	4.17708e-13
C5	708.702	0.673254	0.176976	3.80422	0.000142255	0.00029788
C5AR1	630.641	3.51061	0.407958	8.60532	7.6101e-18	7.56918e-17
C5AR2	162.893	1.01146	0.384596	2.62992	0.00854054	0.0136857
C5orf15	1407.98	0.835782	0.18941	4.41256	1.02155e-05	2.47886e-05
C5orf22	1044.17	-0.584804	0.142332	-4.10873	3.97845e-05	8.92534e-05
C5orf24	2368.13	-0.42759	0.150479	-2.84152	0.00448989	0.00752419
C5orf30	879.14	-1.81266	0.223637	-8.10535	5.25923e-16	4.20535e-15
C5orf34	203.036	0.61988	0.25149	2.46483	0.0137078	0.0212366
C5orf42	6275.32	-0.334758	0.127473	-2.62611	0.00863668	0.0138302
C5orf49	92.7969	-1.44095	0.456134	-3.15905	0.00158283	0.00283433
C5orf51	1784.94	-0.401281	0.145524	-2.75749	0.0058247	0.00958965
C5orf56	891.109	0.597025	0.230736	2.58749	0.00966786	0.0153592
C5orf63	399.913	1.23058	0.30103	4.08789	4.35317e-05	9.7113e-05
C5orf64	87.2565	-0.901652	0.379394	-2.37656	0.017475	0.02658
C5orf66	46.8234	2.97122	0.448632	6.62284	3.52358e-11	1.62913e-10
C6orf106	3971.39	-1.50877	0.129638	-11.6383	2.63151e-31	9.22498e-30
C6orf118	142.628	2.39482	0.428806	5.58487	2.33873e-08	7.84523e-08
C6orf136	380.947	-1.48824	0.12776	-11.6487	2.32994e-31	8.19552e-30
C6orf141	538.157	4.42367	0.575097	7.69205	1.44796e-14	9.92681e-14
C6orf15	48.8433	8.29941	1.21314	6.84124	7.85109e-12	3.93086e-11
C6orf165	69.4023	-0.899662	0.183778	-4.89539	9.81115e-07	2.71089e-06
C6orf183	87.1868	-0.533196	0.160163	-3.32909	0.000871308	0.00162336
C6orf203	414.521	-0.485975	0.120134	-4.04526	5.22644e-05	0.000115565
C6orf211	646.787	-0.740301	0.209463	-3.53428	0.000408882	0.000799775
C6orf223	30.9192	-2.15195	0.531969	-4.04526	5.22657e-05	0.000115565
C6orf226	91.5447	1.1021	0.211221	5.21774	1.8112e-07	5.46287e-07
C6orf47	968.823	0.605653	0.127525	4.74928	2.04139e-06	5.41531e-06
C6orf48	2306.58	0.93415	0.124353	7.51207	5.8199e-14	3.7261e-13
C6orf52	33.4991	1.03585	0.283473	3.65416	0.000258029	0.000521394
C6orf57	381.837	-1.14285	0.128864	-8.86869	7.40131e-19	8.13045e-18
C6orf62	7505.83	0.314818	0.105132	2.99449	0.002749	0.00475964
C6orf89	5728.66	-0.333243	0.0888156	-3.75207	0.000175377	0.00036273
C7	1329.82	3.41442	0.689515	4.95191	7.34874e-07	2.05745e-06
C7orf26	986.2	0.733781	0.14897	4.9257	8.40603e-07	2.33892e-06
C7orf31	137.268	1.36658	0.310498	4.40126	1.07626e-05	2.60519e-05
C7orf43	898.915	0.592161	0.131721	4.49558	6.9379e-06	1.72019e-05
C7orf49	1578.16	1.54105	0.121712	12.6615	9.66896e-37	5.04588e-35
C7orf55	276.94	0.774482	0.157542	4.91603	8.83174e-07	2.4521e-06
C7orf55-LUC7L2	2469.36	0.655524	0.14462	4.53273	5.82275e-06	1.45942e-05
C7orf57	59.3895	4.39086	0.551004	7.96884	1.60173e-15	1.21112e-14
C7orf61	62.9459	0.841302	0.349089	2.40999	0.0159529	0.0244245
C7orf73	1195.54	0.748626	0.159034	4.70733	2.50984e-06	6.57964e-06
C8orf33	2244.22	0.655947	0.136856	4.79298	1.64325e-06	4.40822e-06
C8orf34	241.869	-1.01047	0.448967	-2.25066	0.0244073	0.0362255
C8orf4	1609.8	2.93955	0.511264	5.74957	8.94721e-09	3.14503e-08
C8orf44	350.953	-0.533466	0.128468	-4.15251	3.28846e-05	7.46797e-05
C8orf46	3430.31	-1.92137	0.322105	-5.96503	2.44587e-09	9.18665e-09
C8orf58	307.115	1.20464	0.156542	7.6953	1.4116e-14	9.68718e-14
C8orf76	233.005	0.323377	0.0970895	3.33071	0.000866245	0.00161451
C8orf88	144.201	1.83117	0.207231	8.8364	9.88528e-19	1.07227e-17
C9orf114	1532.07	0.347094	0.124533	2.78717	0.00531699	0.00879872
C9orf129	83.2004	-2.39127	0.478038	-5.00226	5.66619e-07	1.60701e-06
C9orf142	779.178	0.963843	0.173577	5.55282	2.81103e-08	9.33016e-08
C9orf147	79.953	1.2292	0.25544	4.81208	1.49367e-06	4.02993e-06
C9orf156	653.074	0.38573	0.107089	3.60197	0.000315818	0.00062957
C9orf16	1180.54	-0.500629	0.19945	-2.51005	0.0120715	0.0188688
C9orf170	66.4803	0.906367	0.291639	3.10783	0.00188464	0.00334298
C9orf172	373.033	-2.65467	0.260506	-10.1904	2.18839e-24	4.12548e-23
C9orf24	86.893	-1.96398	0.456151	-4.30554	1.66581e-05	3.93167e-05
C9orf3	2580.9	0.397249	0.146289	2.71552	0.00661721	0.0107907
C9orf40	238.091	-0.872862	0.21196	-4.11804	3.82106e-05	8.59628e-05
C9orf41	726.093	-0.881514	0.114832	-7.67655	1.63433e-14	1.1098e-13
C9orf47	208.205	1.87031	0.247728	7.54987	4.35698e-14	2.82528e-13
C9orf50	48.5675	0.969908	0.325124	2.98319	0.00285258	0.0049295
C9orf64	548.483	0.585322	0.165468	3.53737	0.00040413	0.000791153
C9orf69	1132.58	-0.425763	0.156316	-2.72374	0.00645474	0.010549
C9orf72	1318.22	-0.95655	0.274892	-3.47973	0.000501918	0.000968767
C9orf85	421.082	-0.281242	0.114593	-2.45426	0.0141176	0.0218274
C9orf89	725.523	0.425463	0.20047	2.12233	0.0338103	0.0489198
C9orf9	327.925	-0.59408	0.154112	-3.85486	0.000115798	0.000245256
C9orf91	1501.94	-2.35136	0.130742	-17.9847	2.56655e-72	2.04515e-69
CA10	1122.48	-2.95497	0.7379	-4.00456	6.2132e-05	0.000136116
CA11	2555.04	-3.21222	0.409638	-7.84163	4.44752e-15	3.22519e-14
CA12	3528.89	4.17457	0.438505	9.51999	1.73191e-21	2.49352e-20
CA15P1	35.6441	0.897527	0.383587	2.33983	0.0192925	0.0291223
CA2	3229.09	0.984073	0.293638	3.35132	0.000804277	0.00150783
CA3	486.31	2.86982	0.53253	5.38903	7.08391e-08	2.24823e-07
CA4	171.403	-3.06358	0.421507	-7.26816	3.64416e-13	2.12615e-12
CA5BP1	451.165	0.466053	0.156347	2.98088	0.0028742	0.00496562
CA7	73.0211	-4.22872	0.583084	-7.25234	4.09618e-13	2.3765e-12
CA8	456.951	-1.2706	0.35767	-3.55245	0.000381664	0.000750363
CA9	420.6	5.2802	0.581242	9.08435	1.04322e-19	1.25586e-18
CAB39	4502.93	-1.02941	0.142171	-7.24065	4.46544e-13	2.57918e-12
CAB39L	1407.9	-1.92688	0.214	-9.00411	2.17419e-19	2.51648e-18
CABLES1	1191.4	-2.81466	0.279873	-10.0569	8.56484e-24	1.53633e-22
CABP1	2039.15	-5.40664	0.499929	-10.8148	2.92861e-27	7.24909e-26
CABP4	140.246	2.66481	0.318651	8.36277	6.12611e-17	5.4449e-16
CABYR	201.375	-1.80102	0.283367	-6.35578	2.0737e-10	8.78406e-10
CACFD1	772.338	0.853377	0.183463	4.6515	3.29528e-06	8.49889e-06
CACNA1A	2526.55	-3.07907	0.316294	-9.73484	2.14163e-22	3.35884e-21
CACNA1B	2323.3	-4.90784	0.622323	-7.88632	3.11239e-15	2.28743e-14
CACNA1C	2645.95	-2.44931	0.296123	-8.27125	1.32562e-16	1.13301e-15
CACNA1C-IT3	79.6742	-1.15715	0.331789	-3.48761	0.000487363	0.000942517
CACNA1D	1773.57	-1.61604	0.31713	-5.09584	3.47193e-07	1.01184e-06
CACNA1E	4124.2	-3.71823	0.455787	-8.15781	3.41159e-16	2.78602e-15
CACNA1F	35.8466	-2.16649	0.307273	-7.05069	1.78028e-12	9.58272e-12
CACNA1G	1008.19	-2.25892	0.419185	-5.38883	7.09179e-08	2.25039e-07
CACNA1I	1073.62	-4.65978	0.551305	-8.45227	2.85691e-17	2.65067e-16
CACNA1S	26.3732	-2.03918	0.554648	-3.67653	0.000236431	0.000481271
CACNA2D1	3336.12	-2.30065	0.509632	-4.51433	6.35172e-06	1.583e-05
CACNA2D2	337.95	-3.60866	0.48149	-7.49478	6.64098e-14	4.22307e-13
CACNA2D3	1102.55	-4.66733	0.395735	-11.7941	4.18699e-32	1.54352e-30
CACNA2D4	189.921	2.59545	0.425866	6.09452	1.09767e-09	4.28683e-09
CACNB1	1570.73	-2.33793	0.212645	-10.9945	4.06056e-28	1.08551e-26
CACNB2	1234.5	-2.6903	0.382278	-7.03753	1.95673e-12	1.04916e-11
CACNB3	1041.29	-2.46794	0.226934	-10.8752	1.51391e-27	3.8485e-26
CACNB4	3116.28	-2.97651	0.269828	-11.0311	2.70465e-28	7.37302e-27
CACNG2	180.094	-4.7227	0.671764	-7.03029	2.06102e-12	1.10166e-11
CACNG3	447.355	-5.55175	0.765159	-7.25568	3.99656e-13	2.3213e-12
CACNG4	1322.76	1.61363	0.36506	4.42018	9.86193e-06	2.39783e-05
CACNG7	788.662	-1.51119	0.410809	-3.67857	0.000234544	0.0004779
CACNG8	1681.73	-2.7301	0.457187	-5.97152	2.35056e-09	8.84149e-09
CACTIN	1250.59	0.385962	0.152276	2.53463	0.0112568	0.0176975
CACUL1	3018.19	-0.901838	0.156113	-5.77682	7.61253e-09	2.70433e-08
CACYBP	2270.05	-1.41559	0.160652	-8.81153	1.23445e-18	1.32652e-17
CAD	2970.42	0.984141	0.164281	5.99061	2.09049e-09	7.91645e-09
CADM2	6675.1	-2.60803	0.499954	-5.21655	1.82283e-07	5.49635e-07
CADM3	5158.98	-2.34171	0.452136	-5.17922	2.22821e-07	6.62991e-07
CADPS	6730.41	-1.59333	0.437693	-3.64029	0.000272333	0.000548051
CADPS2	2675.87	-2.80138	0.299193	-9.36313	7.7409e-21	1.0414e-19
CALB1	279.957	-3.7812	0.699843	-5.40292	6.55658e-08	2.08823e-07
CALB2	313.958	-1.80556	0.687015	-2.62813	0.00858557	0.0137526
CALCOCO1	3899.64	-0.663579	0.138364	-4.7959	1.6195e-06	4.34903e-06
CALCRL	1740.28	1.49522	0.376744	3.96879	7.22373e-05	0.000156976
CALD1	11437.9	2.31781	0.259135	8.94439	3.74004e-19	4.23422e-18
CALHM1	47.3635	-5.17769	0.754264	-6.86455	6.6701e-12	3.36887e-11
CALHM2	412.269	0.985006	0.271255	3.6313	0.000282002	0.00056663
CALM1	50619.8	-2.31943	0.207567	-11.1743	5.44494e-29	1.56896e-27
CALM2	19603.1	-1.52619	0.15312	-9.96733	2.11847e-23	3.66059e-22
CALM3	15118	-2.62451	0.17158	-15.2961	8.11932e-53	1.6588e-50
CALML4	282.005	0.870709	0.255801	3.40385	0.000664433	0.00125944
CALN1	1377.66	-3.43216	0.578226	-5.93568	2.92632e-09	1.08613e-08
CALR	17955.7	1.85796	0.154211	12.0481	1.98401e-33	8.12347e-32
CALU	9600.81	2.17574	0.232364	9.3635	7.71401e-21	1.03846e-19
CALY	607.435	-4.58996	0.669568	-6.85511	7.12574e-12	3.59025e-11
CAMK1	1173.46	-0.709802	0.22508	-3.15356	0.00161293	0.00288498
CAMK1D	4777.15	-2.97389	0.203707	-14.5989	2.85525e-48	3.72045e-46
CAMK1G	664.12	-4.80511	0.538594	-8.92158	4.59677e-19	5.16184e-18
CAMK2A	18211.8	-5.4089	0.587598	-9.20511	3.41325e-20	4.35173e-19
CAMK2B	4326.06	-3.17242	0.442448	-7.17015	7.4914e-13	4.20729e-12
CAMK2G	4489.68	-2.70106	0.223943	-12.0614	1.68946e-33	7.00044e-32
CAMK2N1	4204.8	-2.71682	0.255891	-10.6171	2.48246e-26	5.62015e-25
CAMK2N2	358.218	-1.42187	0.40843	-3.48131	0.000498962	0.000963329
CAMK4	2669.97	-4.01535	0.423874	-9.47297	2.72007e-21	3.83364e-20
CAMKK1	2196.82	-3.49111	0.367287	-9.50513	1.9979e-21	2.8586e-20
CAMKK2	4223.5	-2.88811	0.160489	-17.9957	2.10484e-72	1.817e-69
CAMKV	2194.35	-3.49238	0.683095	-5.11258	3.17783e-07	9.30183e-07
CAMLG	1403.93	-0.950707	0.137896	-6.89439	5.40946e-12	2.75839e-11
CAMSAP1	5054.83	-0.648712	0.15201	-4.26755	1.97632e-05	4.62399e-05
CAMSAP2	8696.24	-1.16377	0.137357	-8.47263	2.3992e-17	2.23903e-16
CAMSAP3	389.448	-3.15973	0.589564	-5.35945	8.34776e-08	2.6276e-07
CAMTA1	4312.95	-2.42666	0.218534	-11.1043	1.19595e-28	3.37113e-27
CAMTA2	1987.82	-2.63156	0.150767	-17.4545	3.18217e-68	1.93906e-65
CAND2	1032.94	-0.849755	0.22078	-3.84888	0.00011866	0.000250958
CANT1	1463.87	0.855805	0.142074	6.02367	1.70508e-09	6.52612e-09
CANX	32542.5	0.857724	0.148917	5.75975	8.42376e-09	2.97162e-08
CAP1	9056.19	0.875352	0.182776	4.7892	1.67444e-06	4.48842e-06
CAP2	2280.09	-2.93741	0.323047	-9.09282	9.65008e-20	1.16577e-18
CAP2P1	85.7331	0.454671	0.204593	2.22232	0.0262619	0.038775
CAPG	2458.73	2.89878	0.34292	8.45323	2.83353e-17	2.63015e-16
CAPN10-AS1	214.061	0.45083	0.161252	2.79581	0.00517693	0.00857909
CAPN13	26.5601	-2.19413	0.650806	-3.37141	0.000747848	0.00140955
CAPN14	53.382	-1.50044	0.329634	-4.55182	5.31834e-06	1.33996e-05
CAPN2	8815.12	1.24799	0.199214	6.26455	3.73905e-10	1.53916e-09
CAPN5	2771.62	1.4863	0.279042	5.32643	1.0016e-07	3.11673e-07
CAPNS2	32.8252	1.45082	0.37349	3.8845	0.000102542	0.000218836
CAPRIN1	12159.5	0.398487	0.11705	3.40441	0.00066308	0.001257
CAPRIN2	3231.34	-0.522015	0.169466	-3.08034	0.00206761	0.00364569
CAPS	859.316	1.58922	0.234141	6.78742	1.14153e-11	5.60035e-11
CAPS2	825.296	-1.07479	0.179465	-5.98887	2.11309e-09	7.9947e-09
CAPZA1	3896.97	0.623496	0.164499	3.79028	0.000150477	0.000314019
CAPZB	3695.52	0.472006	0.169391	2.78649	0.00532829	0.00881581
CARD10	200.073	1.00615	0.210875	4.77132	1.83022e-06	4.87949e-06
CARD11	382.278	1.40691	0.324622	4.33401	1.4642e-05	3.47842e-05
CARD16	173.759	3.01914	0.346869	8.70398	3.2045e-18	3.30796e-17
CARD6	385.795	1.61831	0.323733	4.9989	5.76578e-07	1.63347e-06
CARD8	2210.01	1.72578	0.164672	10.4801	1.0662e-25	2.25827e-24
CARD8-AS1	107.668	2.03438	0.260163	7.81962	5.29837e-15	3.80359e-14
CARD9	380.326	1.07139	0.31954	3.3529	0.000799687	0.00149977
CARF	1016.68	-0.733606	0.100245	-7.3181	2.51503e-13	1.49903e-12
CARHSP1	1723.87	1.08158	0.230211	4.69821	2.62457e-06	6.86303e-06
CARM1	1370.13	-0.44398	0.138192	-3.21277	0.0013146	0.00238293
CARM1P1	78.6908	-2.12487	0.50802	-4.18265	2.88128e-05	6.59461e-05
CARNS1	1036.15	-1.85903	0.723632	-2.56902	0.0101986	0.0161491
CARS	2896.66	0.613885	0.131801	4.65766	3.19827e-06	8.26103e-06
CARS2	1638.57	0.499916	0.12082	4.13768	3.50837e-05	7.94735e-05
CARTPT	327.793	-4.35292	1.28059	-3.39914	0.000675977	0.00127992
CASC1	162.994	-1.81545	0.290187	-6.25615	3.946e-10	1.61888e-09
CASC10	236.609	-1.20637	0.272569	-4.42592	9.60323e-06	2.33905e-05
CASC15	2197.42	0.626951	0.251793	2.48994	0.0127763	0.0198798
CASC2	237.652	-1.11199	0.143799	-7.73292	1.05108e-14	7.31483e-14
CASC3	3995.21	-0.33465	0.135069	-2.47762	0.0132261	0.0205334
CASC5	1642.58	5.74818	0.379783	15.1354	9.45341e-52	1.71803e-49
CASD1	2308.89	-1.16441	0.228434	-5.09738	3.44384e-07	1.0045e-06
CASK	5270.75	0.905326	0.226019	4.00552	6.18801e-05	0.000135593
CASKIN1	1549.26	-3.51878	0.349292	-10.074	7.19627e-24	1.30668e-22
CASKIN2	998.944	-0.39101	0.17233	-2.26896	0.0232707	0.0346378
CASP1	674.628	2.8059	0.309224	9.07401	1.14716e-19	1.36906e-18
CASP10	464.52	0.940427	0.29369	3.20211	0.00136425	0.00246679
CASP2	1640.92	1.66777	0.212094	7.86336	3.73962e-15	2.73e-14
CASP3	1651.51	1.59524	0.141594	11.2663	1.92516e-29	5.73893e-28
CASP4	1067.68	2.71276	0.32496	8.34799	6.94335e-17	6.13966e-16
CASP5	38.2381	3.15482	0.466367	6.76468	1.33601e-11	6.49449e-11
CASP6	317.138	1.92542	0.165131	11.66	2.04121e-31	7.21669e-30
CASP7	658.896	0.727046	0.262902	2.76547	0.00568415	0.00937315
CASP8	471.009	2.77126	0.290333	9.54509	1.3599e-21	1.97577e-20
CASQ1	263.996	-2.2341	0.363393	-6.14788	7.85256e-10	3.11785e-09
CASQ2	27.8076	-1.93304	0.430273	-4.49259	7.03631e-06	1.74313e-05
CASS4	228.758	1.28755	0.3387	3.80143	0.000143862	0.000301094
CAST	5576.51	0.542407	0.246631	2.19927	0.0278591	0.0409217
CASZ1	238.92	1.8755	0.318048	5.89691	3.70371e-09	1.36076e-08
CAT	2190.24	0.945007	0.24741	3.81959	0.000133672	0.000280846
CATSPER2	613.004	-2.068	0.191834	-10.7801	4.27266e-27	1.04388e-25
CATSPER2P1	90.0967	-0.525904	0.20703	-2.54023	0.011078	0.0174443
CAV1	2464.72	3.07776	0.453178	6.79151	1.10967e-11	5.45305e-11
CAV2	837.143	1.31009	0.347216	3.77314	0.000161207	0.000335094
CBFA2T2	2412.48	-0.508252	0.202875	-2.50524	0.0122369	0.0190963
CBFA2T3	89.3439	-3.43791	0.326631	-10.5254	6.60142e-26	1.43063e-24
CBFB	1717.61	1.19599	0.144523	8.27543	1.27996e-16	1.09534e-15
CBLB	1441.52	0.903704	0.185116	4.88183	1.05106e-06	2.89073e-06
CBLN1	79.2393	-2.14196	0.850923	-2.51722	0.0118284	0.018526
CBLN2	1000.04	-5.86866	0.712722	-8.23415	1.80842e-16	1.51959e-15
CBLN4	464.282	-3.84669	0.489755	-7.85431	4.0197e-15	2.92621e-14
CBR1	2689.67	0.607998	0.219837	2.76568	0.00568041	0.00936845
CBR3	259.999	0.788198	0.217571	3.62272	0.000291519	0.000584392
CBR3-AS1	160.519	-0.606581	0.178994	-3.38883	0.000701906	0.00132659
CBR4	1285.68	-0.367501	0.151444	-2.42664	0.0152393	0.0234201
CBWD3	191.528	-0.857277	0.220184	-3.89345	9.88281e-05	0.000211259
CBWD7	224.232	-0.973492	0.24058	-4.04644	5.20033e-05	0.000115021
CBX1P1	36.5759	-0.518462	0.221471	-2.34099	0.0192327	0.0290446
CBX2	469.391	3.63562	0.362923	10.0176	1.27552e-23	2.24522e-22
CBX3	5024.02	0.887363	0.152426	5.82161	5.8284e-09	2.09277e-08
CBX3P2	55.3895	0.569835	0.229099	2.48729	0.0128722	0.0200199
CBX6	7123.55	-2.10886	0.143682	-14.6773	9.01702e-49	1.25379e-46
CBX7	2372.77	-3.06251	0.21672	-14.1312	2.44092e-45	2.56706e-43
CBX8	352.767	1.12706	0.179986	6.26193	3.80254e-10	1.56404e-09
CBY1	551.999	0.603632	0.123942	4.87026	1.11452e-06	3.05673e-06
CC2D1B	1960.72	0.740856	0.165068	4.48818	7.18349e-06	1.77726e-05
CC2D2A	1502.82	0.644442	0.161391	3.99306	6.52267e-05	0.000142579
CCBE1	54.9111	-2.81569	0.47233	-5.96128	2.50264e-09	9.38456e-09
CCBL1	691.26	-0.711334	0.181912	-3.91033	9.21702e-05	0.000197638
CCDC101	385.042	0.76522	0.111084	6.88867	5.63183e-12	2.86473e-11
CCDC102A	186.814	2.16481	0.281458	7.69142	1.45512e-14	9.97258e-14
CCDC102B	1629.3	1.5102	0.32525	4.64319	3.43071e-06	8.82731e-06
CCDC106	762.789	-0.427205	0.178426	-2.39431	0.0166519	0.0254214
CCDC107	436.901	0.820425	0.168896	4.85758	1.1883e-06	3.25177e-06
CCDC108	33.6013	-1.96393	0.511835	-3.83703	0.000124531	0.000262492
CCDC109B	808.078	3.0873	0.207145	14.904	3.10195e-50	4.86865e-48
CCDC110	48.6081	-2.7749	0.282034	-9.83885	7.65786e-23	1.25519e-21
CCDC113	960.083	-1.48492	0.227236	-6.53471	6.37333e-11	2.85807e-10
CCDC115	985.88	-0.712163	0.132004	-5.39502	6.85154e-08	2.17715e-07
CCDC116	30.176	0.71495	0.308635	2.31649	0.0205318	0.0308557
CCDC12	786.153	0.468627	0.0906645	5.16881	2.35593e-07	6.99387e-07
CCDC120	193.46	-0.847161	0.338741	-2.50091	0.0123873	0.0193166
CCDC124	859.888	0.46888	0.145177	3.22971	0.00123916	0.00225567
CCDC125	634.995	0.700217	0.131897	5.30881	1.10342e-07	3.41511e-07
CCDC127	1100.84	-0.629019	0.170595	-3.6872	0.000226732	0.000463075
CCDC13	180.787	-0.5734	0.195596	-2.93156	0.00337269	0.00576483
CCDC130	1466.18	0.898716	0.146965	6.11519	9.64434e-10	3.79077e-09
CCDC132	2486.97	-0.618525	0.130946	-4.72352	2.31799e-06	6.10683e-06
CCDC134	259.423	0.418128	0.124885	3.34809	0.000813713	0.00152373
CCDC136	2419.35	-0.624794	0.230291	-2.71306	0.00666652	0.0108617
CCDC137	717.306	0.740149	0.132726	5.57651	2.45389e-08	8.19863e-08
CCDC14	4858.88	1.19672	0.174799	6.84623	7.58201e-12	3.80165e-11
CCDC141	170.526	0.977675	0.318248	3.07206	0.00212588	0.00374047
CCDC142	618.656	0.855843	0.146127	5.85683	4.71781e-09	1.7103e-08
CCDC144A	585.489	-1.06264	0.462748	-2.29636	0.0216553	0.0324102
CCDC144B	1344.83	-1.19039	0.420962	-2.82778	0.00468716	0.00783639
CCDC144NL	30.0265	-2.4816	0.662341	-3.74671	0.000179171	0.000370282
CCDC144NL-AS1	78.1758	-1.62472	0.442976	-3.66774	0.000244705	0.000496832
CCDC147-AS1	27.5171	-2.65817	0.330409	-8.04509	8.61802e-16	6.71772e-15
CCDC148	179.531	-1.92584	0.221833	-8.68148	3.90641e-18	4.0046e-17
CCDC149	1363.32	-1.40382	0.137881	-10.1814	2.40101e-24	4.51398e-23
CCDC15	370.353	1.85496	0.23496	7.8948	2.90789e-15	2.14168e-14
CCDC150	371.727	2.44005	0.267461	9.12301	7.30641e-20	8.97831e-19
CCDC150P1	294.655	-0.592914	0.233937	-2.5345	0.0112609	0.0177026
CCDC153	31.5799	0.899302	0.259564	3.46466	0.000530895	0.00102165
CCDC154	99.4401	-1.35927	0.355354	-3.82512	0.000130707	0.000274839
CCDC158	125.509	-2.94184	0.497234	-5.91641	3.29035e-09	1.21449e-08
CCDC162P	48.5999	-0.896885	0.266379	-3.36695	0.000760052	0.00143113
CCDC167	397.489	1.48159	0.149839	9.88791	4.6975e-23	7.85495e-22
CCDC169	188.047	0.914772	0.362166	2.52584	0.0115423	0.0181039
CCDC17	128.016	1.09186	0.178579	6.11415	9.70722e-10	3.81476e-09
CCDC171	958.741	-1.307	0.182608	-7.15737	8.22381e-13	4.59867e-12
CCDC176	304.755	-0.397455	0.146846	-2.70661	0.00679732	0.0110574
CCDC177	145.143	-3.89568	0.456474	-8.53429	1.41014e-17	1.35822e-16
CCDC178	25.4783	-1.17869	0.500959	-2.35286	0.0186296	0.0282017
CCDC18	625.954	1.33766	0.2407	5.5574	2.73828e-08	9.09891e-08
CCDC180	345.521	-1.03973	0.237698	-4.37415	1.21909e-05	2.92904e-05
CCDC181	294.135	-1.32146	0.197523	-6.69014	2.22958e-11	1.05534e-10
CCDC183	68.9345	-1.52474	0.150694	-10.1181	4.59167e-24	8.44852e-23
CCDC184	366.101	-2.08687	0.322237	-6.47618	9.40723e-11	4.13623e-10
CCDC186	1388.09	-1.85111	0.153345	-12.0715	1.49323e-33	6.19973e-32
CCDC22	630.414	0.437303	0.133262	3.28153	0.00103244	0.00190303
CCDC24	364.726	-0.573959	0.20679	-2.77556	0.00551064	0.00910224
CCDC25	1825.09	-0.820557	0.142271	-5.76757	8.04216e-09	2.84621e-08
CCDC28A	550.97	-1.2869	0.170862	-7.53184	5.00296e-14	3.226e-13
CCDC28B	314.885	0.63665	0.197116	3.22982	0.00123867	0.00225508
CCDC3	1193.73	-1.44337	0.217553	-6.63459	3.25395e-11	1.51223e-10
CCDC30	932.973	-1.26477	0.182724	-6.92178	4.46018e-12	2.29352e-11
CCDC39	99.0489	-3.16599	0.385956	-8.20297	2.34525e-16	1.94902e-15
CCDC50	4488.62	0.568084	0.123058	4.6164	3.90448e-06	9.99049e-06
CCDC57	2181.34	-0.508103	0.191261	-2.65659	0.00789359	0.0127149
CCDC58	315.396	0.441966	0.116743	3.78581	0.000153206	0.000319392
CCDC6	2752.56	-1.45089	0.169242	-8.57288	1.00931e-17	9.90095e-17
CCDC61	324.732	-0.739903	0.175919	-4.20592	2.60022e-05	5.98438e-05
CCDC62	162.896	-1.79755	0.225382	-7.97556	1.51697e-15	1.15081e-14
CCDC64	526.551	-3.37004	0.437879	-7.6963	1.40064e-14	9.62151e-14
CCDC65	62.5801	-0.751642	0.315976	-2.3788	0.0173692	0.0264406
CCDC66	1457.85	-0.616615	0.126208	-4.8857	1.03062e-06	2.8379e-06
CCDC68	131.044	-2.79041	0.469897	-5.93834	2.87924e-09	1.07057e-08
CCDC7	647.482	-2.30983	0.163896	-14.0933	4.17651e-45	4.30492e-43
CCDC71	624.262	0.886759	0.113873	7.78723	6.84919e-15	4.84802e-14
CCDC71L	800.334	1.28586	0.463398	2.77486	0.0055226	0.00912054
CCDC77	509.716	0.638865	0.145048	4.40451	1.06023e-05	2.5682e-05
CCDC78	95.9144	-0.627829	0.244102	-2.572	0.0101113	0.0160182
CCDC8	483.146	1.47898	0.404815	3.65348	0.000258711	0.000522567
CCDC80	5024.2	3.97747	0.365436	10.8842	1.37134e-27	3.49034e-26
CCDC81	105.545	1.10836	0.255244	4.34238	1.4095e-05	3.3554e-05
CCDC82	1722.89	-0.453823	0.17276	-2.6269	0.00861678	0.0138004
CCDC85A	458.928	-3.54412	0.444712	-7.96947	1.59355e-15	1.20582e-14
CCDC85B	673.825	-1.14459	0.29499	-3.88012	0.000104407	0.000222564
CCDC85C	1030.94	-0.651465	0.211099	-3.08606	0.00202826	0.00357873
CCDC86	477.924	0.492399	0.130732	3.76647	0.000165574	0.000343379
CCDC87	44.1299	-0.697612	0.202911	-3.43801	0.000585996	0.00112082
CCDC88A	13652.8	-0.331145	0.121729	-2.72034	0.0065214	0.0106478
CCDC89	105.043	0.870533	0.226458	3.84412	0.000120983	0.000255534
CCDC91	1468.49	-1.21495	0.180097	-6.74612	1.5185e-11	7.32658e-11
CCDC92	2036.4	-1.43866	0.110776	-12.9871	1.44764e-38	8.49635e-37
CCDC93	4172.78	0.800979	0.119204	6.71937	1.82506e-11	8.72845e-11
CCDC94	587.369	0.619418	0.152975	4.04916	5.14025e-05	0.000113753
CCDC96	61.3166	-0.575767	0.233639	-2.46435	0.0137262	0.0212636
CCDC97	705.763	0.344059	0.154833	2.22213	0.0262747	0.0387887
CCK	1107.46	-4.67055	0.80039	-5.83534	5.36795e-09	1.93448e-08
CCKBR	164.359	-4.70185	0.655027	-7.17811	7.0684e-13	3.9881e-12
CCL18	37.8706	7.93266	1.33942	5.92245	3.17185e-09	1.17347e-08
CCL2	2241.38	5.24697	0.572958	9.15769	5.30179e-20	6.63701e-19
CCL20	61.6294	7.3128	1.00512	7.27553	3.45074e-13	2.02013e-12
CCL26	13.4122	4.18577	0.746159	5.60976	2.02612e-08	6.83333e-08
CCL28	34.8497	-2.15079	0.379329	-5.66998	1.42811e-08	4.91651e-08
CCL3	883.47	5.28393	0.558439	9.46196	3.02214e-21	4.23918e-20
CCL3L3	383.25	4.91314	0.77544	6.33594	2.35892e-10	9.95154e-10
CCL4	544.047	5.34786	0.625695	8.54707	1.26255e-17	1.22289e-16
CCL4L1	483.272	4.30597	0.674146	6.3873	1.68843e-10	7.21851e-10
CCL5	183.133	2.59266	0.607622	4.2669	1.98212e-05	4.63702e-05
CCL8	66.7481	5.2696	0.789316	6.67616	2.45281e-11	1.15546e-10
CCM2	2012.21	-0.499326	0.140015	-3.56622	0.000362168	0.000715154
CCM2L	120.768	-0.743832	0.249106	-2.98601	0.00282644	0.00488637
CCNA1	127.771	-1.90462	0.555964	-3.42579	0.000613021	0.00116873
CCNA2	703.43	2.76586	0.309992	8.92237	4.5642e-19	5.12804e-18
CCNB1	1223.35	2.17024	0.272447	7.96572	1.6427e-15	1.24119e-14
CCNB2	587.824	5.11225	0.32731	15.619	5.40871e-55	1.24508e-52
CCNC	1274.53	-0.42549	0.139431	-3.05162	0.00227607	0.00398577
CCND1	3034.71	1.75684	0.318607	5.51412	3.50524e-08	1.1498e-07
CCND2	22456	1.08042	0.343543	3.14492	0.00166133	0.00296844
CCNDBP1	1231.39	-0.914727	0.152441	-6.00054	1.96666e-09	7.4803e-09
CCNE1	202.478	0.469236	0.208628	2.24915	0.0245027	0.0363566
CCNE2	567.278	1.94375	0.337826	5.75371	8.73069e-09	3.07362e-08
CCNG2	1538.86	-1.01848	0.195806	-5.20148	1.97703e-07	5.9328e-07
CCNI	9327.72	-1.34698	0.139276	-9.67128	3.99346e-22	6.13773e-21
CCNJ	369.96	0.896111	0.149346	6.00023	1.9704e-09	7.4918e-09
CCNJL	211.483	1.15405	0.270656	4.26389	2.00897e-05	4.6972e-05
CCNL1	4138.79	1.09051	0.143246	7.6129	2.68018e-14	1.7786e-13
CCNL2	7490.39	1.06909	0.166428	6.42377	1.32939e-10	5.75478e-10
CCNL2P1	67.917	-1.55799	0.404303	-3.85353	0.000116427	0.000246464
CCNO	57.1168	-2.42027	0.532574	-4.54447	5.50729e-06	1.38471e-05
CCNT2-AS1	103.376	-1.89848	0.184868	-10.2694	9.68217e-25	1.88529e-23
CCNY	2736.82	-1.12632	0.175593	-6.4144	1.41383e-10	6.10497e-10
CCNYL1	782.23	-0.363334	0.111786	-3.25026	0.00115298	0.00210873
CCNYL2	34.6925	-1.99244	0.616075	-3.23409	0.00122032	0.0022242
CCP110	2946.14	-1.20973	0.205322	-5.89186	3.81866e-09	1.40051e-08
CCPG1	1126.56	-0.8344	0.188996	-4.41492	1.01046e-05	2.45339e-05
CCR1	814.122	3.00259	0.394786	7.60562	2.83547e-14	1.87925e-13
CCR2	87.713	2.88655	0.619221	4.66158	3.13791e-06	8.11119e-06
CCR5	246.625	3.44893	0.487566	7.07377	1.50783e-12	8.1821e-12
CCRL2	116.626	2.6453	0.379733	6.96622	3.25572e-12	1.70377e-11
CCSAP	3511.87	-1.5097	0.268526	-5.62216	1.88585e-08	6.38832e-08
CCSER1	816.589	-4.22148	0.449323	-9.39521	5.71053e-21	7.81445e-20
CCSER2	4238.64	-1.54003	0.139284	-11.0567	2.03387e-28	5.61835e-27
CCT2	5334.54	0.561703	0.155699	3.60763	0.000309006	0.00061706
CCT3	6761.93	0.473926	0.116525	4.06715	4.7591e-05	0.00010568
CCT4P2	34.6816	-2.20635	0.629818	-3.50316	0.000459774	0.000892661
CCT5	5299.15	0.682079	0.141407	4.82351	1.41056e-06	3.81563e-06
CCT6A	6394.57	0.755002	0.178445	4.23101	2.32644e-05	5.389e-05
CCT6B	171.84	-0.509301	0.175178	-2.90733	0.00364527	0.00619496
CCT6P1	442.657	0.756569	0.182083	4.15507	3.25187e-05	7.38973e-05
CCT6P3	265.288	0.616143	0.175792	3.50495	0.000456691	0.000886842
CCT7	5466.23	0.296534	0.128321	2.31088	0.0208397	0.0312844
CCZ1B	635.863	0.692287	0.203084	3.40888	0.000652311	0.00123737
CD101	365.757	2.42607	0.303151	8.00283	1.21588e-15	9.32985e-15
CD109	1860.2	1.76597	0.460061	3.83855	0.000123762	0.000261003
CD14	4813.33	3.97598	0.442568	8.98386	2.61419e-19	3.00226e-18
CD151	4996.97	3.21011	0.237726	13.5034	1.49374e-41	1.10526e-39
CD163	10965.8	5.54173	0.512791	10.807	3.18911e-27	7.8845e-26
CD164	3957.78	0.569054	0.21287	2.67325	0.00751201	0.0121485
CD180	335.457	3.10023	0.405092	7.65315	1.96119e-14	1.32008e-13
CD1D	77.7734	2.89541	0.42097	6.87795	6.07195e-12	3.08028e-11
CD2	81.5611	2.55266	0.690749	3.6955	0.000219458	0.000448883
CD200	1215.29	-2.185	0.282511	-7.73424	1.04024e-14	7.25158e-14
CD207	24.1936	2.96022	0.530807	5.57683	2.44943e-08	8.18636e-08
CD209	93.5432	1.9514	0.553576	3.52507	0.000423367	0.000826235
CD22	326.138	-1.93032	0.583786	-3.30656	0.000944494	0.00175246
CD226	294.225	1.29109	0.298621	4.32349	1.53582e-05	3.63771e-05
CD24	909.203	2.71957	0.587593	4.62833	3.6863e-06	9.45793e-06
CD244	37.3935	1.04781	0.438264	2.39082	0.0168109	0.0256434
CD248	351.455	3.42411	0.390911	8.75931	1.96454e-18	2.07026e-17
CD274	343.623	1.04464	0.371705	2.81041	0.00494788	0.00823334
CD276	3153.76	2.49378	0.233382	10.6854	1.1914e-26	2.7828e-25
CD28	102.121	4.11372	0.60402	6.81056	9.72183e-12	4.80021e-11
CD2AP	1262.27	0.50292	0.229593	2.19049	0.0284889	0.0417599
CD300A	751.743	2.80731	0.387249	7.24935	4.18785e-13	2.42764e-12
CD300C	112.518	2.59534	0.385596	6.73073	1.68811e-11	8.10529e-11
CD300E	90.2145	3.24707	0.607772	5.34257	9.16382e-08	2.86792e-07
CD300LB	45.4259	3.98517	0.5668	7.03101	2.05046e-12	1.09658e-11
CD300LF	136.992	3.44864	0.452149	7.62723	2.39852e-14	1.60092e-13
CD302	888.824	1.18253	0.302568	3.9083	9.29492e-05	0.000199226
CD320	1023.91	1.25463	0.180591	6.94738	3.72141e-12	1.93185e-11
CD33	292.031	2.67753	0.379621	7.05316	1.74894e-12	9.42627e-12
CD36	304.598	2.61276	0.445384	5.8663	4.45633e-09	1.62146e-08
CD37	369.066	2.27439	0.380235	5.98154	2.21044e-09	8.33561e-09
CD38	801.133	1.07439	0.45295	2.37198	0.017693	0.026884
CD3D	36.634	3.2804	0.707897	4.63401	3.58652e-06	9.21218e-06
CD3E	38.5483	2.21269	0.66884	3.30825	0.0009388	0.00174268
CD3EAP	373.574	0.630558	0.185705	3.39549	0.000685056	0.00129605
CD4	1820.29	2.7341	0.37466	7.29754	2.93081e-13	1.73338e-12
CD40	265.06	1.36522	0.366037	3.72974	0.000191677	0.000394669
CD44	15812.8	4.73734	0.425425	11.1356	8.42089e-29	2.38992e-27
CD47	6950.83	-1.24821	0.155118	-8.04682	8.4971e-16	6.63312e-15
CD48	159.837	4.11578	0.533593	7.71333	1.2258e-14	8.46818e-14
CD52	101.097	2.13965	0.541282	3.95292	7.72028e-05	0.000167101
CD53	1904.89	2.30168	0.360039	6.39285	1.62818e-10	6.97101e-10
CD58	409.866	2.33807	0.223706	10.4515	1.44165e-25	3.02004e-24
CD63	11921.1	2.18031	0.21149	10.3093	6.3957e-25	1.268e-23
CD68	60.8245	4.17205	0.471931	8.84038	9.5395e-19	1.03639e-17
CD69	173.743	3.59163	0.479439	7.49131	6.81899e-14	4.32963e-13
CD7	25.2166	1.44234	0.508702	2.83533	0.00457784	0.00766165
CD70	29.8769	4.90867	0.92651	5.29802	1.17062e-07	3.6123e-07
CD72	127.296	2.27999	0.386356	5.90126	3.60728e-09	1.32628e-08
CD74	29809.8	3.3192	0.396742	8.36613	5.95422e-17	5.3035e-16
CD80	80.2859	4.69479	0.498129	9.42484	4.30752e-21	5.97344e-20
CD81	10641.8	0.845506	0.180475	4.68488	2.80126e-06	7.29744e-06
CD82	2659.54	2.64426	0.393648	6.71733	1.85079e-11	8.84127e-11
CD84	2078.91	3.36857	0.398947	8.44366	3.07553e-17	2.84459e-16
CD86	738.492	3.22461	0.386497	8.34317	7.23267e-17	6.37374e-16
CD9	3808.85	2.02351	0.287341	7.0422	1.89235e-12	1.01595e-11
CD93	4985.38	3.78207	0.340977	11.0919	1.37389e-28	3.86218e-27
CD96	76.6748	2.00413	0.564664	3.54925	0.000386325	0.000758694
CD97	1092.35	2.33152	0.307768	7.5756	3.57469e-14	2.34072e-13
CD99	6622.59	3.06762	0.29073	10.5514	5.00299e-26	1.09453e-24
CD99L2	5206.32	-1.59971	0.157721	-10.1426	3.57358e-24	6.64608e-23
CD99P1	324.099	2.32413	0.245051	9.48426	2.44114e-21	3.45934e-20
[truncated: 12,334 more rows]

## Sheet: OPC DEGs
Gene	baseMean	log2FoldChange	lfcSE	stat	pvalue	padj
A2M	28808.2	2.71885	0.341996	7.94995	1.86586e-15	2.16425e-14
A2ML1	231.066	-0.996064	0.383247	-2.59901	0.00934922	0.0178021
AA06	47.3927	-4.47468	0.590117	-7.5827	3.38445e-14	3.33516e-13
AAAS	1040.01	1.02159	0.173132	5.90067	3.62037e-09	1.9294e-08
AACS	2989.42	-1.901	0.196796	-9.65974	4.46998e-22	1.09035e-20
AACSP1	30.2969	-2.16421	0.544546	-3.97434	7.05753e-05	0.000200734
AADAT	504.251	-0.45298	0.181949	-2.4896	0.0127889	0.0236087
AAED1	337.344	1.14662	0.147625	7.7671	8.03024e-15	8.58125e-14
AAGAB	2336.03	-0.727862	0.238431	-3.05271	0.00226786	0.0049224
AAK1	12634.7	-1.83324	0.0921548	-19.8931	4.66924e-88	7.41152e-85
AAMDC	264.634	1.22839	0.149956	8.19168	2.5761e-16	3.30378e-15
AAR2	871.072	1.14233	0.117869	9.69149	3.27704e-22	8.14548e-21
AARD	26.2086	-2.44209	0.574634	-4.24982	2.13941e-05	6.61319e-05
AARS	10917.9	-0.608108	0.192841	-3.15341	0.00161373	0.00359837
AASDHPPT	3888.48	-1.14964	0.312523	-3.67857	0.00023455	0.000610486
AASS	2313.27	1.61328	0.238501	6.76426	1.33996e-11	9.58744e-11
AATF	1461.72	1.19521	0.17085	6.99569	2.63954e-12	2.05924e-11
ABAT	13846.5	-0.614704	0.278619	-2.20625	0.0273666	0.0465049
ABCA1	9317.29	3.30359	0.285586	11.5678	6.00203e-31	3.16757e-29
ABCA10	921.375	-2.6105	0.299952	-8.70307	3.23028e-18	5.1672e-17
ABCA13	323.065	6.3617	0.668683	9.51378	1.83864e-21	4.21559e-20
ABCA17P	244.745	-1.78522	0.319127	-5.59408	2.21801e-08	1.06513e-07
ABCA3	6698.59	-1.31978	0.18609	-7.09217	1.32021e-12	1.0675e-11
ABCA4	58.7952	-1.15994	0.389932	-2.97472	0.00293257	0.00620716
ABCA5	4072.27	-2.23867	0.334428	-6.69402	2.17122e-11	1.51618e-10
ABCA6	960.703	-1.48833	0.416399	-3.5743	0.000351171	0.000886412
ABCA7	707.935	-1.18563	0.33056	-3.58671	0.000334872	0.000847863
ABCA8	2928.78	1.76894	0.569452	3.10639	0.00189389	0.00416724
ABCA9	894.173	-1.67959	0.369843	-4.54136	5.58937e-06	1.88891e-05
ABCB10	829.3	-0.330935	0.115984	-2.85328	0.00432711	0.00884235
ABCB4	137.296	2.84507	0.244814	11.6214	3.20898e-31	1.75643e-29
ABCB7	1085.89	0.785436	0.153337	5.12228	3.01864e-07	1.23542e-06
ABCB9	1362.18	-1.38828	0.197672	-7.02315	2.16919e-12	1.70844e-11
ABCC12	145.48	-4.31436	0.397305	-10.8591	1.80587e-27	7.24982e-26
ABCC3	980.742	4.7251	0.557041	8.48251	2.20383e-17	3.20254e-16
ABCC4	1033.78	1.50899	0.15616	9.66308	4.32652e-22	1.0641e-20
ABCC8	1778.57	-2.31862	0.402163	-5.76537	8.14786e-09	4.12592e-08
ABCD1	293.271	1.92597	0.260052	7.4061	1.30069e-13	1.19553e-12
ABCD2	1365.82	-2.39583	0.325542	-7.35949	1.84608e-13	1.66276e-12
ABCD3	2981.74	0.514035	0.158945	3.23404	0.00122051	0.00278444
ABCF1	2158.5	0.719128	0.171961	4.18194	2.89038e-05	8.7633e-05
ABCF2P1	37.2912	-2.36017	0.605013	-3.90102	9.5787e-05	0.000267175
ABCG4	530.384	-3.40314	0.33069	-10.291	7.73544e-25	2.47474e-23
ABCG8	69.8382	-5.27292	0.485728	-10.8557	1.87365e-27	7.47828e-26
ABHD13	1090.42	-0.886646	0.189548	-4.67769	2.90121e-06	1.02371e-05
ABHD14A	550.263	-1.18404	0.298275	-3.96963	7.19835e-05	0.000204429
ABHD14B	457.125	1.30517	0.237728	5.49019	4.01511e-08	1.8585e-07
ABHD15	296.731	1.47776	0.331082	4.46344	8.06545e-06	2.66459e-05
ABHD16A	267.142	0.823844	0.19408	4.24487	2.18724e-05	6.74948e-05
ABHD17AP6	26.3014	-2.72942	0.450572	-6.05768	1.38099e-09	7.75846e-09
ABHD17C	584.935	-0.49839	0.220184	-2.26351	0.023604	0.0407487
ABHD3	428.755	0.864032	0.227698	3.79463	0.000147863	0.000398271
ABHD4	863.731	1.70588	0.229329	7.43855	1.01798e-13	9.5007e-13
ABHD5	690.995	1.1546	0.156562	7.37475	1.64651e-13	1.49213e-12
ABHD8	1546.94	-2.37112	0.245422	-9.66142	4.39725e-22	1.07764e-20
ABI2	12129.1	-1.27277	0.23339	-5.45339	4.94193e-08	2.26112e-07
ABI3	386.801	2.81478	0.368555	7.63734	2.21758e-14	2.23984e-13
ABI3BP	286.967	1.55572	0.464332	3.35044	0.000806844	0.00190408
ABL1	3195.66	1.00071	0.186129	5.37643	7.59778e-08	3.39424e-07
ABLIM2	2608.46	-2.96678	0.177593	-16.7055	1.19553e-62	6.3256e-60
ABLIM3	1785.25	-0.54462	0.239897	-2.27022	0.0231941	0.0401249
ABO	62.7095	-1.92578	0.598232	-3.21911	0.00128589	0.00292131
ABR	17234.9	-1.66487	0.179628	-9.2684	1.88961e-20	3.87595e-19
ABRACL	269.333	-0.920457	0.328311	-2.80361	0.00505342	0.0101823
ABT1	508.782	0.535818	0.222695	2.40606	0.0161255	0.029051
ABTB1	1314.14	-1.28671	0.33169	-3.87924	0.000104784	0.000290231
ABTB2	350.979	0.894786	0.223716	3.99966	6.34344e-05	0.000181852
AC000095.11	61.0864	-3.00819	0.526148	-5.71738	1.08179e-08	5.37766e-08
AC000120.7	127.886	1.15321	0.360625	3.1978	0.00138478	0.00312807
AC000403.4	83.6275	-3.94203	0.493065	-7.99494	1.29633e-15	1.52768e-14
AC002044.1	38.9666	1.28218	0.436367	2.9383	0.00330019	0.00690593
AC002310.12	57.443	0.713864	0.302739	2.35802	0.0183727	0.0325873
AC002366.3	35.3901	2.68554	0.575745	4.66447	3.09418e-06	1.08586e-05
AC002480.3	61.9455	1.6126	0.515966	3.1254	0.00177563	0.00392712
AC003080.4	183.031	1.38669	0.354033	3.91685	8.97153e-05	0.000251293
AC003090.1	60.7331	1.47444	0.341247	4.32074	1.55506e-05	4.92686e-05
AC003104.1	100.379	0.844886	0.351395	2.40437	0.0162002	0.0291651
AC004019.10	39.9104	1.30199	0.448361	2.90388	0.0036857	0.00762986
AC004053.1	86.6143	-2.93197	0.310835	-9.43257	4.00173e-21	8.77531e-20
AC004381.6	255.781	1.01869	0.404262	2.51988	0.0117395	0.0218396
AC004383.3	26.3683	-2.3599	0.505213	-4.67109	2.99598e-06	1.05427e-05
AC004540.4	75.0507	2.43639	0.734831	3.31558	0.000914535	0.00213695
AC004692.5	27.5927	-2.94733	0.581287	-5.07036	3.97062e-07	1.59435e-06
AC004967.7	176.758	0.693439	0.284261	2.43945	0.0147097	0.0267691
AC004987.9	40.5633	-2.33724	0.30096	-7.76597	8.10226e-15	8.65373e-14
AC005014.5	25.1901	-2.65563	0.517704	-5.12962	2.90328e-07	1.19151e-06
AC005042.2	144.829	1.56678	0.37523	4.17552	2.97312e-05	8.99827e-05
AC005062.2	28.0125	-1.96943	0.375028	-5.25143	1.50925e-07	6.4546e-07
AC005077.12	26.0515	-1.51658	0.475595	-3.1888	0.00142866	0.00321802
AC005082.12	27.7167	1.9036	0.529792	3.59312	0.000326744	0.000829524
AC005154.6	4687.7	0.606137	0.255634	2.37112	0.0177344	0.0315773
AC005235.1	28.9104	-3.88462	0.539682	-7.19797	6.11137e-13	5.14098e-12
AC005518.2	96.4699	-1.51309	0.543489	-2.78404	0.00536861	0.0107555
AC005537.2	63.0547	-2.56252	0.402997	-6.35866	2.0352e-10	1.26419e-09
AC005562.1	118.363	0.729087	0.178499	4.08454	4.41638e-05	0.000130096
AC005592.1	40.6204	-2.24687	0.567037	-3.96247	7.4179e-05	0.000210259
AC005618.6	384.508	2.28725	0.434786	5.26064	1.43556e-07	6.15987e-07
AC005682.5	36.3736	1.9863	0.482414	4.11743	3.83119e-05	0.000113947
AC005752.10	53.4935	-1.21572	0.370873	-3.278	0.00104544	0.00241414
AC005786.7	37.4534	-1.29029	0.421593	-3.06052	0.00220955	0.00480443
AC006003.3	38.4117	-3.62007	0.54709	-6.61696	3.66671e-11	2.50042e-10
AC006129.2	29.6494	1.90438	0.483753	3.93668	8.26153e-05	0.000232669
AC006195.2	25.3155	1.20935	0.296944	4.07264	4.64831e-05	0.000136499
AC006538.1	162.631	-1.41832	0.27093	-5.235	1.64984e-07	7.02093e-07
AC006547.14	28.4456	1.896	0.396959	4.77632	1.78535e-06	6.50551e-06
AC006548.28	43.6961	3.26439	0.851772	3.83247	NA	NA
AC006946.15	55.3112	-1.73386	0.352756	-4.91519	8.86964e-07	3.38622e-06
AC006946.17	29.9439	-0.977025	0.430552	-2.26924	0.0232538	0.0402114
AC006978.6	488.796	0.757325	0.193053	3.92288	8.74962e-05	0.000245544
AC007246.3	895.032	-2.54937	0.144869	-17.5978	2.56002e-69	1.70407e-66
AC007386.3	32.3291	-1.15151	0.422163	-2.72764	0.006379	0.0125734
AC007405.4	58.172	-0.715523	0.322753	-2.21694	0.0266273	0.0453869
AC007563.3	31.0738	-1.18726	0.472231	-2.51415	0.0119321	0.0221699
AC007563.5	59.7554	-1.5374	0.440554	-3.48971	0.000483552	0.00118914
AC007743.1	122.991	-0.916278	0.414786	-2.20904	0.0271721	0.0462277
AC007750.5	24.6702	-5.68549	0.83557	-6.80432	1.01526e-11	7.39498e-11
AC007796.1	57.9953	-2.06871	0.334636	-6.18197	6.33068e-10	3.69543e-09
AC008074.3	33.8827	-1.20709	0.356606	-3.38493	0.000711963	0.00169803
AC008269.2	245.363	-2.23368	0.254274	-8.78453	1.57019e-18	2.59623e-17
AC008982.2	39.3747	1.75712	0.333556	5.26784	1.38041e-07	5.95291e-07
AC009014.3	53.1345	-3.44832	0.700677	-4.92141	8.59235e-07	3.28765e-06
AC009166.7	173.856	1.44691	0.350285	4.13066	3.61718e-05	0.000107956
AC009228.1	30.1148	-1.04646	0.402854	-2.59763	0.00938708	0.0178593
AC009237.8	399.216	-0.445186	0.172769	-2.57677	0.00997274	0.0188761
AC009403.2	177.229	0.628141	0.268348	2.34077	0.0192439	0.0339575
AC009404.2	208.784	1.01495	0.32139	3.158	0.00158853	0.00354563
AC009487.5	62.5387	-4.99314	0.451341	-11.0629	1.89846e-28	8.22998e-27
AC010127.3	142.38	-1.57753	0.240245	-6.56633	5.15689e-11	3.45607e-10
AC010504.2	38.4389	-0.794051	0.261622	-3.03511	0.00240451	0.00518086
AC011196.3	76.0784	-2.87531	0.460431	-6.24482	4.2428e-10	2.53035e-09
AC011242.6	37.7874	1.31681	0.377221	3.49082	0.000481546	0.00118473
AC011288.2	60.1316	-3.05281	0.491642	-6.20941	5.31826e-10	3.13549e-09
AC011322.1	126.138	-5.0467	0.427105	-11.8161	3.22452e-32	1.90108e-30
AC011516.2	29.7327	-5.31963	0.787976	-6.751	1.46827e-11	1.04583e-10
AC011747.4	93.9106	-1.58573	0.423289	-3.74622	0.00017952	0.000475838
AC011899.9	68.6066	4.5868	0.501183	9.15195	5.59129e-20	1.09258e-18
AC011995.1	383.828	-3.76095	0.279245	-13.4683	2.40298e-41	3.0235e-39
AC011995.3	32.611	-8.20229	1.0587	-7.74753	9.36936e-15	9.90454e-14
AC012065.5	30.6433	-1.22247	0.379132	-3.22441	0.00126235	0.00287099
AC012074.2	121.875	-2.26765	0.276878	-8.19006	2.61093e-16	3.34222e-15
AC012358.4	38.7982	-1.53169	0.46354	-3.30433	0.000952049	0.00221761
AC012358.8	32.662	0.951086	0.390968	2.43265	0.014989	0.0272189
AC012506.3	25.2817	-5.37732	0.695104	-7.736	1.02597e-14	1.08015e-13
AC012507.3	86.6654	0.909425	0.5612	1.6205	NA	NA
AC013275.2	36.6416	-3.09741	0.67347	-4.59919	4.24143e-06	1.46016e-05
AC013460.1	76.8381	-1.15165	0.47978	-2.40036	0.0163788	0.0294532
AC015923.2	36.3897	0.929458	0.403435	2.30386	0.0212306	0.0370825
AC015936.3	238.162	2.30952	0.679555	3.39857	0.000677387	0.00162062
AC016549.1	171.747	0.937314	0.329659	2.84328	0.00446519	0.00909927
AC016747.3	299.007	0.666592	0.173168	3.84939	0.000118411	0.000324965
AC016995.3	62.7191	-1.89513	0.59015	-3.21126	0.00132153	0.00299471
AC017002.2	67.2239	3.38175	0.553896	6.10539	1.02549e-09	5.86017e-09
AC017104.6	37.0105	0.771017	0.602757	1.27915	NA	NA
AC018647.3	342.929	1.46177	0.571016	2.55995	0.0104687	0.0197101
AC018738.2	33.5243	1.85525	0.386918	4.79495	1.62713e-06	5.95527e-06
AC018799.1	49.9195	-4.76338	0.477756	-9.97033	2.05541e-23	5.74707e-22
AC019118.3	92.3306	-3.22556	0.461165	-6.99437	2.66461e-12	2.07802e-11
AC020951.1	256.98	0.829148	0.362949	2.28447	0.0223438	0.0388133
AC022153.1	42.5535	-2.02763	0.532286	-3.80928	0.00013937	0.000377414
AC022182.1	28.839	1.80035	0.621547	2.89656	0.00377284	0.00779071
AC023283.1	32.2544	-1.39268	0.50504	-2.75755	0.00582359	0.0115759
AC023481.1	52.365	1.621	0.380492	4.26028	2.04175e-05	6.33271e-05
AC024560.3	1370.28	-0.64202	0.153777	-4.175	2.9799e-05	9.01749e-05
AC025171.1	134.166	2.44247	0.279428	8.74096	2.31134e-18	3.74956e-17
AC025335.1	244.254	-0.814035	0.180839	-4.50144	6.74934e-06	2.25579e-05
AC027612.4	86.5539	5.90659	0.913589	6.46525	1.01129e-10	6.48479e-10
AC034228.3	25.6315	1.05051	0.407335	2.57899	0.00990893	0.0187726
AC044907.1	75.8272	-1.08781	0.265806	-4.0925	4.26747e-05	0.000126087
AC053503.11	23.6958	4.25481	0.797549	5.33486	9.562e-08	4.22329e-07
AC060834.3	28.8747	6.40408	2.36109	2.71234	NA	NA
AC062028.1	232.172	-4.23657	0.387058	-10.9456	6.97886e-28	2.92107e-26
AC064875.2	227.657	2.85364	0.391442	7.29007	3.09791e-13	2.69614e-12
AC067945.3	24.2199	1.1577	0.478	2.42197	0.0154368	0.0279444
AC067956.1	253.964	-4.31925	0.237003	-18.2244	3.30278e-74	2.8397e-71
AC067961.1	26.5237	-3.45822	0.534509	-6.4699	9.80708e-11	6.29796e-10
AC068057.1	32.8967	1.83712	0.523303	3.51063	0.000447039	0.00110607
AC068580.5	43.9223	1.55694	0.504048	3.08887	0.00200917	0.00440259
AC069213.1	82.4445	-1.91602	0.614182	-3.11963	0.00181078	0.00399801
AC072062.1	35.8592	1.62857	0.319069	5.10412	3.32335e-07	1.35154e-06
AC073046.25	24.4416	1.9431	0.33479	5.80394	6.47726e-09	3.32236e-08
AC073052.1	111.334	0.832875	0.332844	2.5023	0.012339	0.0228538
AC073109.2	154.033	1.72053	0.610904	2.81637	0.004857	0.00982469
AC073283.4	71.5139	2.29048	0.217204	10.5453	5.34136e-26	1.90361e-24
AC073342.12	69.9098	1.26053	0.526148	2.39577	0.0165855	0.0297653
AC074117.10	105.6	0.860926	0.318723	2.70117	0.00690951	0.0135158
AC074286.1	426.402	0.584844	0.170845	3.42324	0.000618801	0.00149222
AC074289.1	148.794	2.45104	0.39237	6.24676	4.19061e-10	2.50212e-09
AC074363.1	87.3751	-1.31806	0.400099	-3.29434	0.000986524	0.00228987
AC079630.4	71.2021	-1.1447	0.405564	-2.82249	0.00476521	0.00965062
AC079796.1	36.573	4.50806	0.705477	6.39008	1.65796e-10	1.0426e-09
AC079922.3	105.692	-0.681251	0.206291	-3.30238	0.000958669	0.00223099
AC083843.4	59.9626	-1.0353	0.374055	-2.76778	0.00564395	0.0112481
AC084082.3	51.4365	2.8636	0.466087	6.14391	8.05143e-10	4.64601e-09
AC090587.4	112.601	-1.05318	0.238214	-4.42113	9.81843e-06	3.20626e-05
AC091729.9	155.44	1.07487	0.277845	3.86861	0.000109457	0.000302153
AC091878.1	404.517	-4.41808	0.341426	-12.9401	2.67319e-38	2.60194e-36
AC092066.1	240.728	-0.985991	0.207616	-4.74911	2.04314e-06	7.37454e-06
AC092535.3	47.1736	-1.05821	0.480261	-2.20341	0.0275657	0.0468125
AC092667.2	25.6061	-1.65119	0.449691	-3.67184	0.000240813	0.000625291
AC092675.3	39.9997	3.72464	0.343302	10.8495	2.00604e-27	7.96052e-26
AC093323.3	691.627	-0.660233	0.283833	-2.32613	0.0200117	0.0351738
AC093495.4	32.8273	1.13968	0.475393	2.39734	0.0165148	0.0296539
AC093590.1	72.0383	2.56199	0.823615	3.11066	0.0018667	0.00411181
AC093627.9	39.4761	2.16752	0.417713	5.18902	2.11405e-07	8.84858e-07
AC093642.5	259.833	-0.928423	0.176367	-5.26416	1.4083e-07	6.05926e-07
AC093673.5	173.567	1.26704	0.294802	4.29793	1.72398e-05	5.4221e-05
AC093843.1	111.517	-4.13588	0.301976	-13.696	1.07201e-42	1.50482e-40
AC096559.1	66.2541	1.67096	0.692833	2.41178	0.0158749	0.0286371
AC096772.6	587.946	-2.39287	0.288558	-8.29251	1.10886e-16	1.47622e-15
AC097721.2	48.0963	2.02187	0.369816	5.46725	4.57073e-08	2.0978e-07
AC097724.3	24.5866	1.48096	0.319326	4.63776	3.52199e-06	1.22536e-05
AC098614.2	45.1457	1.43723	0.380608	3.77613	0.000159282	0.000426468
AC098820.3	27.7286	1.50673	0.462344	3.25889	0.00111849	0.00257102
AC098826.5	120.184	-3.8521	0.589083	-6.53914	6.18719e-11	4.10655e-10
AC104058.1	39.9097	1.08922	0.434649	2.50598	0.0122114	0.0226379
AC104623.1	55.0396	-2.54369	0.354808	-7.1692	7.54396e-13	6.27953e-12
AC108463.2	38.2694	1.39491	0.504894	2.76278	0.00573114	0.0114065
AC108488.4	47.4529	1.59054	0.327035	4.8635	1.15326e-06	4.3221e-06
AC108938.5	44.7627	3.34376	0.500725	6.67785	2.42477e-11	1.68639e-10
AC109826.1	37.8504	1.48379	0.303528	4.88847	1.01621e-06	3.83847e-06
AC110781.3	33.3554	-3.68255	0.472162	-7.79934	6.22338e-15	6.74827e-14
AC113617.1	78.6098	-5.7538	0.579335	-9.93173	3.02951e-23	8.31302e-22
AC114271.2	147.906	-0.924027	0.271468	-3.40382	0.000664516	0.00159168
AC114730.3	80.6637	2.00745	0.730593	2.7477	0.00600152	0.011901
AC114765.1	138.82	-4.62982	0.340008	-13.6168	3.18174e-42	4.29119e-40
AC114765.2	44.4919	-4.80504	0.588133	-8.16998	3.08437e-16	3.91427e-15
AC115522.3	53.2972	-2.18314	0.344501	-6.33712	2.34107e-10	1.44117e-09
AC131056.3	165.206	-1.96739	0.575998	-3.41562	0.000636375	0.00153049
AC133680.1	30.3112	-0.906386	0.782973	-1.15762	NA	NA
AC136289.1	120.899	-2.06657	0.234664	-8.80649	1.29125e-18	2.15923e-17
AC137723.5	71.3256	-3.70118	0.317891	-11.6429	2.49406e-31	1.3724e-29
AC137932.4	45.2832	-2.11593	0.481814	-4.39159	1.12527e-05	3.64276e-05
AC138430.4	93.0996	-6.00112	0.585221	-10.2545	1.12999e-24	3.55989e-23
AC138969.4	219.172	-1.88523	0.414037	-4.55328	5.28148e-06	1.79131e-05
AC140542.2	62.321	-5.1563	0.709262	-7.26995	3.59618e-13	3.1062e-12
AC141586.5	180.53	-0.755565	0.235627	-3.20662	0.00134305	0.00304079
AC141928.1	167.281	-2.5832	0.241797	-10.6833	1.21836e-26	4.56275e-25
AC144449.1	59.0839	1.06696	0.248953	4.28577	1.82106e-05	5.70047e-05
AC144831.1	31.5022	0.401606	0.49776	0.806826	NA	NA
AC144833.1	175.665	-2.8045	0.538197	-5.21092	1.87906e-07	7.93255e-07
AC144835.1	26.8523	2.95496	0.597072	4.94908	7.4565e-07	2.87921e-06
AC145343.1	32.4209	1.50611	0.307065	4.90487	9.34884e-07	3.55481e-06
AC156455.1	41.6604	1.79431	0.367237	4.88597	1.0292e-06	3.88537e-06
AC159540.1	91.6417	-1.06429	0.439954	-2.41909	0.0155593	0.028144
AC253572.1	194.182	1.13232	0.419824	2.69714	0.00699381	0.0136587
ACAA1	1663.81	0.809581	0.128179	6.31604	2.6835e-10	1.64071e-09
ACAA2	1255.71	0.659918	0.266329	2.47783	0.0132183	0.0243124
ACACA	9515.6	-0.482787	0.183297	-2.63391	0.00844077	0.016222
ACACB	2372.62	-0.756643	0.26581	-2.84655	0.00441957	0.00901966
ACAD10	1183.31	0.717424	0.152912	4.69174	2.70893e-06	9.61179e-06
ACAD11	325.439	0.632242	0.249092	2.53818	0.011143	0.0208294
ACAD9	1881.73	0.26533	0.099299	2.67204	0.00753927	0.0146325
ACADS	506.79	0.864183	0.16493	5.23969	1.60845e-07	6.85326e-07
ACADSB	2119.44	-1.15688	0.225016	-5.14132	2.7281e-07	1.12521e-06
ACAN	819.149	3.14125	0.478737	6.56153	5.3259e-11	3.56587e-10
ACAP2-IT1	151.493	-1.94281	0.408449	-4.75657	1.9691e-06	7.12473e-06
ACBD7	1156.1	-2.9759	0.301589	-9.8674	5.76406e-23	1.52489e-21
ACCS	585.027	0.893236	0.277758	3.21587	0.00130048	0.00295154
ACER2	352.751	-1.36337	0.271523	-5.02119	5.13531e-07	2.0273e-06
ACER3	2652.94	0.70165	0.182785	3.83868	0.0001237	0.000337952
ACHE	643.357	-0.908391	0.386977	-2.3474	0.0189047	0.0334189
ACIN1	5382.3	0.56017	0.187805	2.98272	0.00285701	0.00606714
ACKR1	274.151	-0.929841	0.380191	-2.44572	0.0144562	0.0263566
ACKR3	531.508	1.85324	0.267308	6.93298	4.12053e-12	3.14799e-11
ACLY	6336.1	0.760314	0.268748	2.82909	0.004668	0.00946953
ACN9	218.636	0.709382	0.255136	2.78041	0.00542898	0.0108637
ACO2	8918.2	-0.801703	0.156893	-5.10986	3.22405e-07	1.31401e-06
ACOT11	1576.66	-1.21889	0.358406	-3.40088	0.000671699	0.00160776
ACOT4	111.352	-1.47985	0.460361	-3.21453	0.00130658	0.00296387
ACOT7	2346.48	-1.77385	0.204119	-8.69027	3.61587e-18	5.75721e-17
ACOX2	196.699	1.31405	0.395433	3.32308	0.000890298	0.00208433
ACP2	1456.89	0.622241	0.21025	2.95953	0.00308105	0.006487
ACP5	125.425	4.9874	0.629081	7.92807	2.2258e-15	2.55447e-14
ACPP	68.8233	2.53221	0.489985	5.16794	2.36693e-07	9.83123e-07
ACRBP	46.8066	2.13869	0.312256	6.84915	7.42894e-12	5.49055e-11
ACSF2	439.245	0.783299	0.296753	2.63957	0.00830118	0.015976
ACSL1	4095.72	1.97198	0.446787	4.41369	1.01624e-05	3.30915e-05
ACSL3	9576.67	-1.01622	0.284532	-3.57157	0.000354853	0.000894939
ACSL4	3912.57	-0.736317	0.289803	-2.54075	0.0110616	0.0206998
ACSL6	7759.7	-2.71045	0.269985	-10.0393	1.02442e-23	2.94373e-22
ACSM5	388.561	2.88247	0.363728	7.92479	2.28533e-15	2.61842e-14
ACTA1	32.2835	0.341413	0.57419	0.594598	NA	NA
ACTA2	1686.69	2.54224	0.640334	3.97017	7.18203e-05	0.000203993
ACTA2-AS1	383.093	-1.66426	0.331396	-5.02197	5.11455e-07	2.01988e-06
ACTB	77686.2	1.23025	0.231851	5.30623	1.11913e-07	4.88953e-07
ACTBP7	194.562	0.902011	0.410778	2.19586	0.028102	0.0476541
ACTG1	38191.5	1.10408	0.270876	4.07594	4.58289e-05	0.000134712
ACTG1P12	123.979	-2.46367	0.565128	-4.35948	1.30369e-05	4.18183e-05
ACTL6A	511.66	2.34267	0.172185	13.6055	3.71186e-42	4.94157e-40
ACTL6B	1102.61	-2.3721	0.547144	-4.33542	1.4548e-05	4.63055e-05
ACTN2	2274.7	-0.725507	0.268951	-2.69754	0.0069854	0.0136448
ACTN4	6966.15	0.590593	0.187973	3.14189	0.00167858	0.00373209
ACTR10	2165.43	-0.669355	0.279681	-2.39328	0.0166985	0.0299447
ACTR1B	3691.74	-0.789044	0.216934	-3.63726	0.000275553	0.000709159
ACTR2	9215.99	-0.638872	0.248597	-2.56992	0.0101723	0.0192221
ACTR3	5393.98	0.83844	0.198137	4.23162	2.32016e-05	7.1319e-05
ACTR3B	1155.15	-1.28983	0.274105	-4.70559	2.53137e-06	9.02312e-06
ACTR3C	178.274	-0.866692	0.296506	-2.92302	0.00346655	0.00722402
ACTR6	1134.61	-0.776761	0.268527	-2.89267	0.0038198	0.00787822
ACTRT3	67.8354	-0.916655	0.279986	-3.27393	0.00106064	0.00244731
ACVR1B	2868.57	-1.31508	0.198674	-6.61929	3.60917e-11	2.46199e-10
ACVR1C	812.959	-2.30415	0.403088	-5.71623	1.0891e-08	5.41012e-08
ACVR2A	1528.44	-0.963488	0.207517	-4.64294	3.43479e-06	1.19745e-05
ACVR2B	2139.06	-0.286614	0.125218	-2.28892	0.0220841	0.0383979
ACY1	100.293	0.654685	0.280279	2.33584	0.0194997	0.034356
ACYP1	363.544	-0.904297	0.204304	-4.42622	9.58976e-06	3.13605e-05
ADA	156.326	1.39055	0.540007	2.57506	0.0100224	0.0189596
ADAM10	4819.06	0.413746	0.180052	2.29792	0.0215664	0.0376023
ADAM11	3007.9	-3.89482	0.363021	-10.7289	7.44662e-27	2.84558e-25
ADAM12	580.381	2.79784	0.390659	7.16184	7.9604e-13	6.60752e-12
ADAM15	1790.37	1.00563	0.17743	5.66773	1.44699e-08	7.10073e-08
ADAM17	2272.95	0.85759	0.107139	8.00444	1.20014e-15	1.42052e-14
ADAM22	8551.01	-1.75634	0.292129	-6.01221	1.83017e-09	1.01221e-08
ADAM23	5083.8	-1.34817	0.352593	-3.8236	0.000131516	0.000357555
ADAM28	1365.99	2.92243	0.497278	5.87685	4.18144e-09	2.21014e-08
ADAM29	24.4186	-1.79495	0.667629	-2.68854	0.00717647	0.0139836
ADAM32	624.532	-0.602527	0.248451	-2.42514	0.0153026	0.0277259
ADAM8	282.436	1.45933	0.523689	2.78664	0.00532572	0.0106768
ADAM9	5029.97	1.70696	0.199909	8.53869	1.35756e-17	2.03142e-16
ADAMDEC1	46.0166	8.44838	0.929925	9.085	1.03694e-19	1.95053e-18
ADAMTS1	2160.54	1.17155	0.421536	2.77924	0.00544864	0.0108968
ADAMTS12	158.638	4.01633	0.319327	12.5775	2.80871e-36	2.39495e-34
ADAMTS13	532.817	-1.02331	0.240406	-4.25657	2.0759e-05	6.43379e-05
ADAMTS14	634.995	3.06667	0.613014	5.0026	5.6562e-07	2.21767e-06
ADAMTS15	261.32	3.54663	0.342706	10.3489	4.23306e-25	1.37775e-23
ADAMTS16	176.183	-1.15356	0.452286	-2.55052	0.0107563	0.0201981
ADAMTS17	497.705	-0.971934	0.213381	-4.55493	5.24024e-06	1.77791e-05
ADAMTS18	146.082	2.30929	0.790881	2.9199	0.00350141	0.00729003
ADAMTS19	393.813	-2.17519	0.296843	-7.32775	2.34055e-13	2.07196e-12
ADAMTS20	157.952	4.05987	0.858964	4.72647	NA	NA
ADAMTS3	395.999	-2.11492	0.425767	-4.96732	6.78831e-07	2.63253e-06
ADAMTS4	2692.2	2.1171	0.803115	2.63612	0.00838612	0.0161275
ADAMTS5	175.599	0.98035	0.371471	2.6391	0.00831256	0.0159964
ADAMTS6	336.571	1.6813	0.359537	4.67628	2.92127e-06	1.02973e-05
ADAMTS7	141.198	2.29228	0.461321	4.96895	6.73162e-07	2.61153e-06
ADAMTS7P1	115.857	-3.32572	0.301466	-11.0318	2.68362e-28	1.1442e-26
ADAMTS8	551.6	-1.46278	0.386318	-3.78646	0.000152806	0.000410566
ADAMTS9	2509.31	1.63977	0.645892	2.53877	0.0111242	0.0208074
ADAMTSL1	396.287	1.47239	0.460107	3.20011	0.00137377	0.00310559
ADAMTSL4	108.134	1.63938	0.652586	2.51213	0.0120004	0.0222848
ADAMTSL4-AS1	234.742	2.09964	0.314226	6.68195	2.3579e-11	1.64154e-10
ADAMTSL5	26.9978	-3.08603	0.741343	-4.16275	3.14435e-05	9.47344e-05
ADAP1	1083.59	-0.908072	0.373942	-2.42838	0.0151665	0.0275058
ADAP2	870.944	2.73379	0.284449	9.61084	7.1958e-22	1.72057e-20
ADARB1	2518.22	-1.93814	0.209214	-9.26391	1.97085e-20	4.03056e-19
ADARB2	1648.07	-1.06702	0.451577	-2.36288	0.0181337	0.0321987
ADAT1	1293	0.33828	0.138112	2.44932	0.0143127	0.0261157
ADCK4	1128.21	0.880365	0.213397	4.12547	3.69978e-05	0.000110261
ADCK5	285.898	-0.393637	0.177576	-2.21673	0.0266418	0.045408
ADCY1	21352	-4.27055	0.329546	-12.9589	2.09272e-38	2.05635e-36
ADCY2	7604.6	-1.7567	0.249547	-7.03954	1.92871e-12	1.53132e-11
ADCY3	2804.2	-0.718263	0.146869	-4.8905	1.0058e-06	3.80123e-06
ADCY5	3379.82	-1.79797	0.291805	-6.16153	7.20433e-10	4.17941e-09
ADCY7	1481.21	1.43232	0.249269	5.74606	9.13446e-09	4.59618e-08
ADCY9	2324.41	-1.45388	0.197729	-7.35288	1.93977e-13	1.74334e-12
ADCYAP1	416.719	-2.82362	0.599145	-4.71275	2.44398e-06	8.72818e-06
ADD1	16247.5	-0.473257	0.142952	-3.31061	0.000930924	0.0021723
ADD2	14213.8	-2.46373	0.452316	-5.44693	5.1247e-08	2.34112e-07
ADD3-AS1	162.144	-1.22791	0.373235	-3.2899	0.00100224	0.00232347
ADH5P3	102.696	-1.07938	0.40913	-2.63823	0.00833401	0.0160318
ADIPOR1	2687.87	0.765062	0.189121	4.04535	5.2244e-05	0.000152096
ADIPOR2	3980.42	0.828728	0.33551	2.47006	0.0135092	0.0247811
ADIRF-AS1	108.205	-0.933494	0.368095	-2.53602	0.0112122	0.0209436
ADK	898.378	-0.492139	0.176501	-2.7883	0.0052985	0.0106295
ADM	580.413	2.63775	0.60149	4.38536	1.15795e-05	3.74344e-05
ADORA2B	232.621	-1.20956	0.402611	-3.00429	0.00266198	0.0056887
ADORA3	1374.75	3.38585	0.445782	7.59529	3.0711e-14	3.03943e-13
ADPGK	1692.05	1.38168	0.164163	8.4165	3.87887e-17	5.43384e-16
ADPRH	276.949	2.49851	0.238155	10.4911	9.49257e-26	3.31437e-24
ADPRHL1	297.484	-2.36239	0.254157	-9.29501	1.4719e-20	3.0556e-19
ADPRHL2	717.131	0.901891	0.195561	4.61181	3.99174e-06	1.37926e-05
ADRA1A	800.25	-1.11598	0.387114	-2.88281	0.00394139	0.0081063
ADRA1B	245.633	-2.35421	0.313871	-7.50057	6.35418e-14	6.0703e-13
ADRA1D	68.2622	-2.1012	0.546374	-3.84572	0.000120201	0.000329439
ADRA2A	194.632	-2.98035	0.3682	-8.09439	5.75532e-16	7.09869e-15
ADRA2B	51.2668	2.22819	0.579713	3.84362	0.000121235	0.000331876
ADRA2C	118.896	-1.64909	0.301677	-5.4664	4.59259e-08	2.10736e-07
ADRB1	496.702	-2.57741	0.355066	-7.25898	3.90019e-13	3.34777e-12
ADRB2	259.071	1.49445	0.433671	3.44605	0.000568851	0.00138097
ADRBK1	4373.29	-0.932376	0.198186	-4.70455	2.54429e-06	9.06526e-06
ADRBK2	5632.08	-2.05786	0.212308	-9.69282	3.23461e-22	8.05141e-21
ADRM1	1498.28	0.684671	0.225017	3.04275	0.0023443	0.00506646
ADSL	1285.06	0.702671	0.179809	3.90787	9.31127e-05	0.000259962
ADSSL1	239.965	1.26325	0.197033	6.41137	1.44218e-10	9.12027e-10
ADTRP	125.509	-3.62772	0.345138	-10.5109	7.69351e-26	2.70452e-24
AEBP1	2817.35	2.1221	0.464402	4.56952	4.88845e-06	1.66457e-05
AEBP2	1955.73	-1.20758	0.134878	-8.95311	3.45613e-19	6.17466e-18
AEN	822.566	2.18523	0.282159	7.74468	9.58235e-15	1.01193e-13
AES	9863.25	-1.41277	0.240536	-5.87343	4.26867e-09	2.24991e-08
AF001548.5	60.1834	1.67015	0.355851	4.6934	2.68695e-06	9.5447e-06
AF038458.3	25.7763	-1.75777	0.390639	-4.49972	6.80423e-06	2.27303e-05
AF064858.11	40.2679	-1.8518	0.509144	-3.63708	0.000275741	0.000709554
AF064858.6	30.6689	-1.26283	0.4341	-2.90908	0.00362499	0.00752079
AF064858.8	75.7492	-2.28172	0.440492	-5.17993	2.2197e-07	9.26258e-07
AF064860.7	26.5124	1.82966	0.471941	3.87689	0.0001058	0.000292966
AF127936.5	88.5739	1.84403	0.410015	4.49746	6.87716e-06	2.29591e-05
AF131217.1	185.805	-1.41746	0.493384	-2.87293	0.00406689	0.00834364
AF186192.5	93.9217	0.892376	0.231979	3.8468	0.000119672	0.000328252
AFAP1-AS1	41.5156	-2.57911	0.544639	-4.73545	2.18565e-06	7.85592e-06
AFAP1L1	516.698	1.73917	0.308863	5.63089	1.79285e-08	8.67827e-08
AFAP1L2	2363.42	1.01123	0.345261	2.92889	0.0034018	0.00709984
AFF2	746.806	-2.22914	0.52294	-4.26272	2.01958e-05	6.27147e-05
AFF3	3607.17	-2.07568	0.298174	-6.9613	3.37148e-12	2.59495e-11
AFMID	982.149	1.29445	0.323367	4.00304	6.25348e-05	0.000179522
AFTPH	3193.02	-0.81116	0.20512	-3.95456	7.66753e-05	0.000216828
AGA	480.025	1.5462	0.285737	5.41129	6.25724e-08	2.82349e-07
AGAP1	11076.4	-1.09573	0.138077	-7.9356	2.09474e-15	2.41211e-14
AGAP1-IT1	89.926	1.17384	0.384776	3.0507	0.00228307	0.00494969
AGAP2	11843.5	-1.11879	0.780331	-1.43373	NA	NA
AGAP2-AS1	510.406	6.01668	0.935487	6.4316	NA	NA
AGAP3	4542.67	-1.15807	0.191633	-6.04315	1.5113e-09	8.45829e-09
AGBL2	43.0018	2.0378	0.462067	4.41019	1.0328e-05	3.35989e-05
AGBL4	937.407	-2.73856	0.264248	-10.3636	3.63054e-25	1.18726e-23
AGBL4-IT1	59.4955	-2.2006	0.564905	-3.89552	9.79874e-05	0.000272907
AGBL5	810.184	0.591408	0.22862	2.58687	0.00968532	0.018381
AGL	2855.03	-0.505028	0.186179	-2.7126	0.00667581	0.0131096
AGMO	77.9213	3.57837	0.473265	7.56104	3.99863e-14	3.90495e-13
AGPAT3	5722.82	-0.544478	0.147623	-3.68831	0.000225747	0.000589434
AGPAT4	4293.65	0.599839	0.252205	2.37838	0.017389	0.0310615
AGPAT4-IT1	365.848	1.5435	0.336172	4.59139	4.40307e-06	1.51077e-05
AGPAT5	2628.13	0.985343	0.196047	5.02606	5.00662e-07	1.98105e-06
AGPAT6	3205.81	0.543252	0.111563	4.86947	1.11899e-06	4.20206e-06
AGT	6612.79	0.807951	0.310161	2.60494	0.00918898	0.0175228
AGTPBP1	7402.02	-0.926656	0.348686	-2.65756	0.00787078	0.0152158
AGTRAP	418.5	2.24243	0.265335	8.45133	2.88012e-17	4.12431e-16
AHCY	2221.94	0.96901	0.232278	4.17177	3.02245e-05	9.13302e-05
AHCYL1	15355.6	-0.782442	0.308853	-2.53338	0.0112968	0.0210901
AHDC1	1968.95	-1.42845	0.264098	-5.40879	6.34503e-08	2.85998e-07
AHI1	5847.72	-1.14039	0.206953	-5.51039	3.5804e-08	1.66926e-07
AHNAK2	5500.58	-1.26021	0.357043	-3.52957	0.000416229	0.0010353
AHR	2522.31	2.18003	0.182378	11.9534	6.23539e-33	3.82938e-31
AHRR	169.492	-1.22178	0.346408	-3.527	0.000420298	0.0010448
AHSA2	3059.5	0.775661	0.316593	2.45003	0.0142845	0.0260735
AIF1	699.626	3.08416	0.451254	6.83465	8.22047e-12	6.04955e-11
AIF1L	4770.69	1.54206	0.353605	4.36098	1.29483e-05	4.15662e-05
AIFM1	783.108	0.47301	0.196625	2.40564	0.016144	0.0290793
AIFM3	1742.35	-3.18572	0.324898	-9.8053	1.06833e-22	2.74191e-21
AIM1	489.072	3.31488	0.456592	7.26003	3.86997e-13	3.32321e-12
AIM2	36.2726	2.57275	0.531978	4.83619	1.32351e-06	4.91199e-06
AIMP1	1103.27	0.435966	0.155419	2.8051	0.00503008	0.0101403
AIMP1P1	67.1775	-1.18575	0.427007	-2.7769	0.00548808	0.0109671
AIMP2	539.861	1.33087	0.286187	4.65036	3.31351e-06	1.15667e-05
AJ006998.2	55.1983	-4.0693	0.487338	-8.35006	6.82266e-17	9.32198e-16
AJAP1	5109.86	-3.0524	0.19649	-15.5346	2.02249e-54	6.42062e-52
AJUBA	120.728	2.00582	0.314359	6.38067	1.76314e-10	1.10551e-09
AK2	2209.28	1.22076	0.152572	8.0012	1.23217e-15	1.45706e-14
AK3P3	100.246	0.848946	0.31303	2.71203	0.00668734	0.0131285
AK4	2647.85	-0.728277	0.283116	-2.57236	0.0101008	0.0190957
AK5	11030.5	-2.55337	0.451987	-5.64922	1.61177e-08	7.84964e-08
AK9	929.061	-0.553023	0.150826	-3.66663	0.000245764	0.000637423
AKAP1	2429.46	-0.552378	0.102713	-5.37789	7.53653e-08	3.36834e-07
AKAP10	2803.52	-0.330484	0.144319	-2.28997	0.0220233	0.0383115
AKAP11	19183.5	-1.74352	0.211737	-8.23434	1.80552e-16	2.34615e-15
AKAP13	7051.91	1.28695	0.197223	6.52534	6.78496e-11	4.4688e-10
AKAP17A	1083.65	0.579666	0.16286	3.55929	0.000371859	0.00093338
AKAP2	67.825	1.12411	0.343363	3.27381	0.00106107	0.00244804
AKAP3	110.941	1.20913	0.355139	3.40468	0.000662415	0.0015872
AKAP5	2272.99	-3.48841	0.455641	-7.65605	1.91741e-14	1.95387e-13
AKAP6	17441.7	-1.14886	0.260544	-4.40946	1.0363e-05	3.37021e-05
AKAP7	997.28	-0.851458	0.166457	-5.11518	3.13443e-07	1.27994e-06
AKAP9	10785.7	-0.468984	0.143118	-3.27691	0.00104949	0.00242267
AKIP1	550.985	0.606778	0.139048	4.36381	1.27818e-05	4.10637e-05
AKNA	1537.16	1.13303	0.243084	4.66107	3.14577e-06	1.10209e-05
AKNAD1	30.3288	2.08803	0.476756	4.37966	1.18867e-05	3.83733e-05
AKR1A1	1487.12	1.31516	0.226314	5.8112	6.2025e-09	3.19253e-08
AKR1B1	2653	1.39519	0.172138	8.10507	5.27143e-16	6.54489e-15
AKR1C2	107.18	-1.38367	0.475671	-2.90888	0.00362725	0.00752472
AKR1E2	365.108	-2.65603	0.26663	-9.96149	2.24665e-23	6.26482e-22
AKR7A2	1062.55	0.685908	0.165305	4.14936	3.33411e-05	0.000100043
AKT1	3927.21	0.702941	0.169357	4.15063	3.31555e-05	9.95557e-05
AKT1S1	732.745	0.524217	0.167307	3.13326	0.00172876	0.00383416
AKT3	17536.3	-1.56696	0.218052	-7.18619	6.66245e-13	5.57049e-12
AKTIP	2189.08	-0.798414	0.169947	-4.69801	2.6271e-06	9.34499e-06
AL022393.7	73.341	-1.75146	0.579465	-3.02255	0.00250658	0.00538391
AL022393.9	66.4263	-0.926343	0.377979	-2.45078	0.0142547	0.0260238
AL023806.1	73.6077	1.2085	0.328179	3.68244	0.000231011	0.000602187
AL035610.2	28.5851	-1.61519	0.556205	-2.90395	0.00368481	0.00762879
AL096864.1	30.4984	-2.18693	0.5535	-3.9511	7.77923e-05	0.000219836
AL133243.1	192.97	0.689475	0.276759	2.49125	0.0127296	0.023514
AL133245.2	30.8186	1.2331	0.365502	3.37372	0.000741608	0.00176181
AL354680.1	40.4993	-2.79894	0.689168	-4.06134	4.87928e-05	0.000142814
AL356135.1	32.4025	-4.92026	0.739916	-6.64975	2.93594e-11	2.02416e-10
AL365181.2	306.547	-1.11054	0.226957	-4.89317	9.92229e-07	3.75268e-06
AL450992.2	217.166	-1.85831	0.272807	-6.81181	9.63811e-12	7.05007e-11
AL590431.1	27.4852	1.27463	0.357641	3.56398	0.000365268	0.000918623
AL662800.1	82.3119	1.53612	0.31266	4.91306	8.96639e-07	3.4181e-06
AL845472.1	380.885	-0.824274	0.346742	-2.3772	0.0174447	0.031142
ALAS2	71.683	2.33405	0.895377	2.60678	0.00913973	0.0174354
ALCAM	6095.76	0.729383	0.257936	2.82776	0.00468743	0.00950428
ALDH16A1	387.813	1.771	0.171329	10.3368	4.80094e-25	1.55522e-23
ALDH18A1	1572.4	0.851228	0.21184	4.01826	5.86305e-05	0.000169303
ALDH2	4373.52	-0.55739	0.250951	-2.22111	0.0263436	0.0449814
ALDH3B1	308.683	3.12486	0.456834	6.84026	7.90471e-12	5.82549e-11
ALDH5A1	3936.49	-1.47515	0.217466	-6.78335	1.17417e-11	8.46278e-11
ALDH6A1	6551.64	-0.896265	0.219939	-4.07506	4.60028e-05	0.000135166
ALDH9A1	2784.89	0.609639	0.241922	2.51998	0.0117361	0.0218372
ALDOA	29906.3	-0.670907	0.253491	-2.64667	0.00812888	0.0156707
ALDOC	18215.9	-1.64941	0.2101	-7.85061	4.14011e-15	4.59061e-14
ALG1	756.046	0.435678	0.149206	2.91998	0.00350053	0.00728895
ALG11	750.201	0.425751	0.153815	2.76795	0.00564104	0.0112434
ALG1L10P	107.427	-1.30907	0.345605	-3.78777	0.000152005	0.000408574
ALG1L11P	118.958	-1.04742	0.436974	-2.39699	0.0165303	0.0296739
ALG2	764.811	0.660307	0.15289	4.31884	1.56851e-05	4.96337e-05
ALG3	317.226	1.31593	0.160994	8.17381	2.98811e-16	3.79912e-15
ALG5	522.711	0.879176	0.193982	4.53226	5.8355e-06	1.96693e-05
ALG6	604.076	1.22027	0.324184	3.76413	0.000167133	0.000446098
ALG8	805.972	0.76165	0.131439	5.7947	6.8444e-09	3.4959e-08
ALKBH1	404.757	0.352824	0.102718	3.43487	0.00059284	0.00143549
ALKBH2	346.184	1.08627	0.245625	4.42248	9.75738e-06	3.18834e-05
ALKBH3	680.307	0.456958	0.169787	2.69135	0.0071163	0.0138742
ALKBH5	4222.76	-0.368316	0.167346	-2.20093	0.0277411	0.0470896
ALKBH6	220.056	-0.416334	0.185418	-2.24538	0.0247435	0.0425202
ALKBH7	401.062	0.809943	0.25264	3.20592	0.00134631	0.00304785
ALMS1P	125.967	-0.834542	0.346162	-2.41084	0.0159158	0.0287083
ALOX12B	38.9548	-3.67581	0.560573	-6.55723	5.48151e-11	3.66055e-10
ALOX12P2	356.984	-0.749414	0.327763	-2.28645	0.022228	0.0386286
ALOX15B	127.98	2.64265	0.707387	3.73579	0.00018713	0.000494674
ALOX5	600.476	2.60482	0.474562	5.48889	4.04476e-08	1.87138e-07
ALOX5AP	576.108	3.91152	0.463134	8.44577	3.02053e-17	4.30744e-16
ALOXE3	55.7964	-2.79448	0.446471	-6.25904	3.87357e-10	2.32358e-09
ALPK1	694.528	2.28172	0.381932	5.97417	2.31269e-09	1.26652e-08
ALPK2	160.139	5.89962	0.476969	12.369	3.84631e-35	3.01782e-33
ALPK3	681.517	0.844708	0.21123	3.999	6.36096e-05	0.000182329
ALS2	4265.21	-0.870685	0.135814	-6.41087	1.44691e-10	9.14735e-10
ALS2CL	819.946	-1.97704	0.384737	-5.13867	2.76695e-07	1.1401e-06
ALYREF	816.242	1.09535	0.278043	3.93949	8.16542e-05	0.000230151
AMDHD2	860.305	0.45548	0.184071	2.47448	0.013343	0.0245111
AMER3	1624.14	-4.10482	0.496579	-8.2662	1.383e-16	1.81772e-15
AMICA1	105.62	2.41437	0.76738	3.14625	0.0016538	0.00368135
AMIGO1	3020.75	-2.58982	0.300219	-8.62646	6.32803e-18	9.86245e-17
AMMECR1L	1067.28	0.610099	0.122905	4.96399	6.90611e-07	2.6767e-06
AMMECR1LP1	91.2536	-2.92624	0.46002	-6.36112	2.00288e-10	1.24486e-09
AMN1	1290.41	-1.78696	0.276404	-6.46503	1.01278e-10	6.49229e-10
AMOT	4496.18	-1.12334	0.300162	-3.74244	0.000182239	0.000482795
AMOTL1	3405.31	0.627123	0.155614	4.03	5.57772e-05	0.000161697
AMOTL2	3278.32	1.37211	0.272631	5.03287	4.832e-07	1.91747e-06
AMPD2	3579.34	-0.792826	0.224324	-3.53428	0.000408882	0.00101864
AMPD3	1438.56	1.02247	0.406503	2.51529	0.0118933	0.0221038
AMPH	5139.19	-3.0192	0.37533	-8.04412	8.68657e-16	1.04695e-14
AMY2B	1578.81	-1.21456	0.233478	-5.20201	1.97141e-07	8.29696e-07
AMZ2	2593.66	-0.405716	0.176616	-2.29716	0.0216097	0.037665
AMZ2P1	842.467	-0.584886	0.188326	-3.10571	0.00189826	0.00417637
ANAPC11	843.302	0.811634	0.186243	4.35793	1.31301e-05	4.2078e-05
ANAPC5	6035	0.444493	0.187869	2.36598	0.0179826	0.0319642
ANG	51.7489	2.87918	0.375424	7.66915	1.73142e-14	1.77928e-13
ANGPT2	888.846	1.96129	0.605058	3.24149	0.00118908	0.00272116
ANGPTL2	1012.49	3.56693	0.274838	12.9783	1.62439e-38	1.6512e-36
ANGPTL6	52.9774	1.85932	0.304655	6.10304	1.04072e-09	5.93405e-09
ANK1	1560.98	-2.38957	0.378001	-6.32159	2.58887e-10	1.58629e-09
ANK2	60471.4	-1.8725	0.192794	-9.7124	2.66973e-22	6.67756e-21
ANK3	23221.7	-1.84323	0.347315	-5.3071	1.11383e-07	4.87048e-07
ANKDD1A	937.313	-1.20344	0.249882	-4.81601	1.46458e-06	5.39864e-06
ANKEF1	128.076	-0.837661	0.30599	-2.73755	0.00618994	0.0122393
ANKFN1	347.526	1.4496	0.318778	4.54738	5.43189e-06	1.8396e-05
ANKFY1	5598.21	0.709536	0.117592	6.03387	1.6008e-09	8.93736e-09
ANKH	6125.49	-1.06664	0.217799	-4.89736	9.71318e-07	3.67899e-06
ANKIB1	7101.83	0.504675	0.156076	3.23351	0.00122278	0.00278931
ANKMY2	1886.27	-0.79315	0.249928	-3.17352	0.00150603	0.00337975
ANKRA2	599.71	0.610698	0.143617	4.25226	2.11622e-05	6.54992e-05
ANKRD10	4618.53	1.35146	0.210475	6.42104	1.35348e-10	8.58302e-10
ANKRD10-IT1	359.426	1.31836	0.346323	3.80672	0.000140819	0.00038094
ANKRD11	5776.27	-1.20109	0.154595	-7.76925	7.8953e-15	8.4458e-14
ANKRD12	8692.74	-1.44408	0.204654	-7.05621	1.71106e-12	1.36534e-11
ANKRD13A	1922.49	0.995775	0.197316	5.04659	4.49766e-07	1.79341e-06
ANKRD13B	1001.63	-0.860062	0.20219	-4.25372	2.10247e-05	6.50929e-05
ANKRD13C	2272.48	-0.594964	0.148815	-3.99801	6.38783e-05	0.000183023
ANKRD16	447.981	-1.00766	0.172324	-5.84748	4.99087e-09	2.60528e-08
ANKRD17	11371.3	-0.364509	0.0908019	-4.01433	5.96147e-05	0.000171833
ANKRD18B	425.041	-3.61542	0.456645	-7.91734	2.42643e-15	2.77546e-14
ANKRD18CP	463.621	-2.52033	0.352564	-7.14857	8.76897e-13	7.2466e-12
ANKRD19P	445.423	-3.85745	0.581863	-6.62949	3.36858e-11	2.30473e-10
ANKRD2	58.0944	-2.22295	0.373774	-5.94732	2.72563e-09	1.47504e-08
ANKRD20A1	89.2366	-1.04291	0.445555	-2.34069	0.019248	0.0339618
ANKRD20A11P	216.591	-1.70319	0.746991	-2.28007	0.0226035	0.0392216
ANKRD20A4	193.733	-1.41239	0.485294	-2.91038	0.0036099	0.00749323
ANKRD20A5P	400.918	-4.39756	0.386636	-11.3739	5.64043e-30	2.77119e-28
ANKRD20A8P	39.2086	-2.69328	0.434213	-6.20266	5.55153e-10	3.26184e-09
ANKRD22	73.4665	3.50879	0.926929	3.78539	0.000153465	0.000412175
ANKRD24	1726.27	-3.4638	0.275735	-12.5621	3.41276e-36	2.87438e-34
ANKRD26	3098.26	-1.55736	0.172944	-9.00502	2.15626e-19	3.92714e-18
ANKRD26P3	151.996	-3.33092	0.743427	-4.48049	7.44702e-06	2.47216e-05
ANKRD27	1905.12	-0.72295	0.134876	-5.36009	8.31784e-08	3.69513e-07
ANKRD29	606.034	-2.58609	0.294498	-8.78136	1.61505e-18	2.66399e-17
ANKRD30B	375.921	-4.74711	0.342426	-13.8632	1.05864e-43	1.58297e-41
ANKRD30BL	344.204	-3.17912	0.487244	-6.52469	6.81433e-11	4.48672e-10
ANKRD31	101.28	-0.838285	0.289324	-2.8974	0.00376274	0.00777451
ANKRD32	1216.04	-1.46918	0.219227	-6.70167	2.06051e-11	1.44572e-10
ANKRD33B	2732.85	-3.52166	0.239171	-14.7245	4.48979e-49	9.7523e-47
ANKRD34A	644.054	-3.3867	0.274506	-12.3375	5.69289e-35	4.41627e-33
ANKRD34B	28.3261	-2.30831	0.699548	-3.29972	0.000967815	0.002251
ANKRD34C	331.4	-5.11754	0.582276	-8.78886	1.51081e-18	2.50407e-17
ANKRD34C-AS1	173.409	-5.32474	0.342385	-15.5519	1.54463e-54	5.05927e-52
ANKRD35	399.944	-0.588407	0.210508	-2.79517	0.00518721	0.0104224
ANKRD36BP2	1009.43	-2.93186	0.35791	-8.1916	2.57774e-16	3.30383e-15
ANKRD39	428.757	-0.332575	0.144461	-2.30218	0.0213253	0.0372322
ANKRD42	1232.89	-1.33659	0.181973	-7.34503	2.05709e-13	1.83997e-12
ANKRD44	2223.47	1.50907	0.166896	9.04199	1.53848e-19	2.84213e-18
ANKRD44-IT1	158.785	1.93456	0.283377	6.82682	8.68193e-12	6.36644e-11
ANKRD45	192.087	-1.00443	0.371766	-2.70178	0.00689699	0.0134938
ANKRD46	2623.35	-1.4978	0.298112	-5.02427	5.05348e-07	1.99805e-06
ANKRD52	3278.71	-0.770802	0.157741	-4.8865	1.02642e-06	3.8763e-06
ANKRD55	109.463	-1.7597	0.33377	-5.27218	1.34816e-07	5.82604e-07
ANKRD62	124.107	-4.63772	0.539579	-8.59508	8.32099e-18	1.27661e-16
ANKRD7	116.554	-1.54212	0.31887	-4.8362	1.32344e-06	4.91199e-06
ANKRD9	1255.36	-1.3286	0.227055	-5.85142	4.87394e-09	2.5481e-08
ANKS1A	2408.2	-0.483607	0.144292	-3.35159	0.000803484	0.00189723
ANKS1B	8674.83	-1.86716	0.296696	-6.29317	3.11042e-10	1.88387e-09
ANLN	5268.62	1.97907	0.557212	3.55174	0.000382692	0.000957657
ANO1	127.362	-1.17737	0.321831	-3.65836	0.000253839	0.000657457
ANO3	1828.3	-2.96083	0.635875	-4.65631	3.21926e-06	1.12611e-05
ANO5	3101.07	-1.7634	0.218991	-8.05241	8.11823e-16	9.83097e-15
ANO6	3253.05	2.2441	0.253742	8.84401	9.23466e-19	1.56708e-17
ANP32A	3550.11	0.636779	0.156228	4.07597	4.58222e-05	0.000134712
ANP32B	898.668	0.882599	0.253121	3.48687	0.000488705	0.0012011
ANPEP	264.861	3.20554	0.721893	4.44046	NA	NA
ANTXR1	2532.5	1.13081	0.261942	4.31703	1.58143e-05	4.99814e-05
ANTXR2	590.249	1.53191	0.234693	6.5273	6.69662e-11	4.41344e-10
ANXA1	2097.79	3.72023	0.320512	11.6071	3.7908e-31	2.04773e-29
ANXA11	4794.63	-1.18686	0.257275	-4.61319	3.96543e-06	1.37109e-05
ANXA2	3608.75	4.22849	0.321529	13.1512	1.6752e-39	1.84855e-37
ANXA2P3	28.6852	-3.90335	0.646308	-6.03945	1.54637e-09	8.64516e-09
ANXA2R	87.8482	1.85293	0.255414	7.25459	4.02866e-13	3.45385e-12
ANXA3	265.66	-2.56723	0.334799	-7.66797	1.74742e-14	1.79393e-13
ANXA4	866.205	0.903399	0.247902	3.64417	0.000268255	0.000691843
ANXA5	4932.38	2.18639	0.158743	13.7732	3.69547e-43	5.33258e-41
ANXA6	10216.6	-0.747256	0.315255	-2.37032	0.0177726	0.0316344
AOAH	565.176	2.49758	0.378656	6.59592	4.22623e-11	2.86116e-10
AOC2	132.357	-0.865937	0.256657	-3.37391	0.000741091	0.00176078
AOX1	158.411	2.29594	0.276097	8.31569	9.12171e-17	1.23104e-15
AP000223.42	75.8637	-0.697702	0.222186	-3.14018	0.00168847	0.00375124
AP000266.7	30.9386	1.24528	0.336301	3.70286	0.000213184	0.000558538
AP000275.65	36.9215	-2.4659	0.361149	-6.82794	8.61415e-12	6.32123e-11
AP000432.1	38.1717	1.05421	0.280268	3.76142	0.000168952	0.000450547
AP000439.1	42.0087	1.53099	0.516195	2.96591	0.00301793	0.00637019
AP000473.5	100.082	0.920234	0.371874	2.47458	0.0133392	0.0245063
AP000476.1	23.5873	2.91176	0.684818	4.25188	2.11986e-05	6.56017e-05
AP000648.5	74.479	-1.65695	0.508554	-3.25817	0.00112134	0.00257671
AP000688.29	111.177	1.09698	0.408128	2.68783	0.00719186	0.0140123
AP000708.1	49.5926	-0.687613	0.293496	-2.34284	0.0191376	0.0337987
AP000783.1	34.5634	1.0541	0.460667	2.28821	0.0221253	0.0384629
AP000892.6	133.204	3.0184	0.586689	5.14481	2.67788e-07	1.10577e-06
AP000936.1	76.4757	1.16733	0.36839	3.16873	0.00153104	0.00342658
AP001046.5	44.3251	1.07236	0.475838	2.25363	0.0242192	0.0417094
AP001107.1	32.4518	-1.12939	0.446649	-2.52858	0.0114526	0.0213579
AP001258.4	116.441	1.09829	0.200452	5.47905	4.27607e-08	1.97177e-07
AP001347.6	89.8449	-0.946499	0.421478	-2.24567	0.0247254	0.0424962
AP001350.4	60.5899	1.61264	0.349767	4.61061	4.01493e-06	1.38611e-05
AP001372.2	415.267	-1.11089	0.204492	-5.43242	5.55939e-08	2.52516e-07
AP002954.3	174.563	0.906517	0.369889	2.45078	0.0142547	0.0260238
AP006222.2	97.8283	-2.34474	0.531229	-4.4138	1.01574e-05	3.30805e-05
AP006285.2	118.579	-3.06884	0.47651	-6.44025	1.19277e-10	7.59423e-10
AP1AR	974.868	-0.710982	0.262246	-2.71113	0.00670548	0.0131603
AP1B1	6239.95	0.755018	0.230578	3.27446	0.00105862	0.00244293
AP1G2	1864.04	-1.82477	0.386994	-4.71525	2.41417e-06	8.6262e-06
AP1M1	3231.29	-0.818659	0.114418	-7.15498	8.36862e-13	6.93242e-12
AP1S2	2601.63	1.07505	0.377921	2.84465	0.00444607	0.00906569
AP1S3	121.709	-0.848681	0.187685	-4.52184	6.13038e-06	2.06027e-05
AP2A1	5161.9	-1.144	0.168832	-6.77595	1.23595e-11	8.8802e-11
AP2A2	5217.25	-0.825245	0.141928	-5.81453	6.08045e-09	3.13205e-08
AP2B1	15446.7	-0.639228	0.173352	-3.68746	0.000226506	0.00059119
AP3B1	2281.55	0.751924	0.171466	4.38526	1.15848e-05	3.74457e-05
AP3B2	3746.21	-2.59636	0.255118	-10.1771	2.50985e-24	7.70696e-23
AP3D1	5573.03	-0.750303	0.159166	-4.71397	2.42936e-06	8.67748e-06
AP3M1	1765.61	0.562649	0.149464	3.76444	0.000166926	0.000445603
AP3M2	3502.27	-1.51388	0.263785	-5.73906	9.52027e-09	4.77518e-08
AP3S1	1605.2	-0.907038	0.242016	-3.74784	0.000178363	0.000473134
AP4M1	649.088	0.799134	0.251246	3.18068	0.00146931	0.00330346
AP4S1	1379.09	-1.3866	0.149774	-9.25789	2.08516e-20	4.25592e-19
AP5B1	1053.58	-0.516572	0.191677	-2.69501	0.00703858	0.0137383
AP5M1	4584.58	-0.975529	0.193307	-5.04654	4.49889e-07	1.79356e-06
AP5Z1	1140.39	0.955989	0.155115	6.16312	7.13262e-10	4.13897e-09
APAF1	1215.91	0.777296	0.150348	5.16997	2.34126e-07	9.73439e-07
APBA1	5764.89	-2.20995	0.0907295	-24.3575	4.82397e-131	2.48857e-127
APBA2	8662.33	-0.695461	0.175798	-3.95602	7.62081e-05	0.000215625
APBA3	482.538	0.710216	0.265374	2.67628	0.00744447	0.0144662
APBB1	10213.4	-0.755402	0.272274	-2.77442	0.00553002	0.0110424
APBB1IP	749.214	2.34668	0.341885	6.86395	6.69816e-12	4.97719e-11
APBB2	4801.3	0.41745	0.169061	2.46923	0.0135405	0.0248318
APC	25692.5	-0.901941	0.17635	-5.1145	3.14569e-07	1.28359e-06
APC2	7467.78	-0.821022	0.262366	-3.1293	0.00175225	0.00388167
APCDD1	1807.33	0.858906	0.288156	2.9807	0.00287594	0.00610294
APCDD1L-AS1	26.8899	0.996483	0.391825	2.54319	0.0109846	0.020565
APEX1	2230.96	1.35214	0.275927	4.90036	9.56615e-07	3.63104e-06
APEX2	416.52	1.40807	0.187359	7.51535	5.67607e-14	5.45278e-13
APH1A	2585.32	1.68346	0.206606	8.14814	3.69561e-16	4.64144e-15
APH1B	1434.33	0.486971	0.175553	2.77392	0.00553852	0.0110561
APIP	653.756	0.490422	0.218993	2.23944	0.0251271	0.043079
APLF	715.179	-0.60357	0.151684	-3.97913	6.9169e-05	0.000197168
APLN	1638.37	2.6707	0.404867	6.59647	4.21056e-11	2.85149e-10
APLNR	2856.94	3.3362	0.444447	7.50641	6.07693e-14	5.81891e-13
APOBEC3C	308.046	3.93347	0.354386	11.0994	1.26315e-28	5.55758e-27
APOBEC3D	37.6366	1.45516	0.543229	2.67872	0.00739047	0.0143694
APOBEC3F	71.1484	2.00605	0.428308	4.68366	2.81793e-06	9.96881e-06
APOBEC3G	166.547	2.4062	0.357714	6.72659	1.7368e-11	1.22862e-10
APOBR	102.017	2.72922	0.476347	5.72947	1.00743e-08	5.03473e-08
APOC1	1687.11	5.24853	0.355481	14.7646	2.47834e-49	5.53628e-47
APOC2	48.275	3.95393	0.47265	8.36545	5.98834e-17	8.26552e-16
APOD	6329.4	2.31939	0.512148	4.52875	5.93329e-06	1.99761e-05
APOE	20542.8	2.78926	0.361645	7.71271	1.23177e-14	1.28762e-13
APOL6	2038.46	1.3556	0.4796	2.82654	0.00470546	0.00953521
APOM	48.4944	1.33272	0.270464	4.92755	8.32658e-07	3.19247e-06
APOOL	1237.32	-0.878959	0.186414	-4.7151	2.41591e-06	8.63094e-06
APPL2	2745.25	0.842902	0.158778	5.30869	1.10416e-07	4.83334e-07
APRT	668.508	1.2257	0.221948	5.52248	3.34245e-08	1.56266e-07
APTR	245.659	0.486379	0.205507	2.36673	0.0179459	0.0319099
AQP1	5840.32	3.85539	0.5433	7.09624	1.28193e-12	1.03858e-11
AQP11	176.691	-0.773821	0.228897	-3.38066	0.000723132	0.00172248
AQP3	48.911	1.34943	0.423909	3.18332	0.00145599	0.0032753
AQP4-AS1	451.988	-0.901725	0.222807	-4.04711	5.18548e-05	0.000151133
AQP5	42.6379	2.07666	0.479344	4.33229	1.47566e-05	4.69102e-05
AQP6	90.5921	1.66363	0.29899	5.56418	2.63389e-08	1.25145e-07
AQP7P1	81.3509	2.36428	0.877533	2.69424	0.00705495	0.0137676
AQP9	274.22	1.54011	0.661938	2.32668	NA	NA
AR	658.037	1.88862	0.367838	5.13437	2.8309e-07	1.16319e-06
ARAF	905.363	1.46448	0.204916	7.14676	8.8853e-13	7.33686e-12
ARAP1	3123.94	0.86809	0.262638	3.30528	0.000948825	0.00221132
ARC	857.39	1.73987	0.429363	4.05222	5.07331e-05	0.000148073
AREG	86.1498	7.03835	0.963003	7.30875	2.69636e-13	2.36662e-12
ARF1P2	52.6458	0.937526	0.430327	2.17863	0.0293588	0.0494829
ARF3	10353.7	-1.24886	0.222337	-5.61697	1.9433e-08	9.38011e-08
ARF4	2281.97	0.699562	0.237055	2.95106	0.00316687	0.00664919
ARFGAP3	1546.06	0.67483	0.118663	5.68694	1.29335e-08	6.37257e-08
ARFGEF1	5397.61	-0.24092	0.10135	-2.3771	0.0174493	0.0311476
ARFGEF2	7442.51	-0.903961	0.194939	-4.63714	3.53257e-06	1.22883e-05
ARFIP1	1140.03	0.76595	0.151901	5.04242	4.59681e-07	1.83083e-06
ARHGAP1	2536.66	0.717957	0.184809	3.88486	0.000102388	0.000284051
ARHGAP11A	390.4	2.71172	0.382649	7.08672	1.37331e-12	1.10826e-11
ARHGAP11B	256.341	2.93725	0.426158	6.89239	5.48615e-12	4.12411e-11
ARHGAP15	259.748	2.67426	0.332028	8.05431	7.99301e-16	9.6964e-15
ARHGAP17	1260.41	0.532376	0.242745	2.19315	0.0282968	0.0479374
ARHGAP18	762.936	2.07187	0.218259	9.49272	2.25078e-21	5.10384e-20
ARHGAP19	554.063	1.09461	0.194103	5.63932	1.70724e-08	8.29499e-08
ARHGAP19-SLIT1	161.137	-1.67236	0.664155	-2.51803	0.0118014	0.0219469
ARHGAP20	1707.54	-1.60275	0.275182	-5.82433	5.73437e-09	2.96712e-08
ARHGAP22	974.467	1.43004	0.248539	5.7538	8.72601e-09	4.40355e-08
ARHGAP24	890.238	1.37913	0.316881	4.35221	1.34772e-05	4.31031e-05
ARHGAP25	559.687	2.09411	0.321679	6.50992	7.51894e-11	4.92707e-10
ARHGAP26	10027.6	-1.90968	0.19144	-9.97535	1.95417e-23	5.4863e-22
ARHGAP27	756.985	0.908389	0.31771	2.85917	0.00424746	0.00869077
ARHGAP28	221.958	-1.70175	0.329946	-5.15766	2.50056e-07	1.03571e-06
ARHGAP29	2463.47	-0.744317	0.23035	-3.23124	0.00123253	0.00280938
ARHGAP30	619.383	3.58052	0.411449	8.70223	3.25431e-18	5.19758e-17
ARHGAP31	3699.55	1.52837	0.302214	5.05723	4.2538e-07	1.7021e-06
ARHGAP32	15261.1	-2.49331	0.192154	-12.9756	1.68307e-38	1.69966e-36
ARHGAP33	1168.25	-0.8366	0.269544	-3.10376	0.00191077	0.00420214
ARHGAP35	14551	-0.771567	0.174271	-4.42739	9.53807e-06	3.12013e-05
ARHGAP39	1392.41	-1.00368	0.27235	-3.68526	0.000228465	0.000596003
ARHGAP4	690.191	2.26746	0.302368	7.49902	6.42988e-14	6.13694e-13
ARHGAP42	1085.28	1.30148	0.264762	4.91565	8.84885e-07	3.37999e-06
ARHGAP44	2763.17	-3.7213	0.24173	-15.3944	1.78367e-53	5.33421e-51
ARHGAP5	18014.8	-1.07116	0.173085	-6.18863	6.06897e-10	3.55372e-09
ARHGAP6	361.546	1.61235	0.290484	5.55058	2.84731e-08	1.34665e-07
ARHGDIB	1621.56	3.1775	0.302091	10.5184	7.10981e-26	2.51217e-24
ARHGDIG	2171.95	-3.44142	0.287119	-11.986	4.20613e-33	2.6381e-31
ARHGEF10	2604.2	0.662869	0.263193	2.51857	0.0117834	0.0219169
ARHGEF11	6353.75	-1.263	0.143237	-8.8175	1.1704e-18	1.96992e-17
ARHGEF12	22640.3	-1.03645	0.14035	-7.38474	1.52753e-13	1.39102e-12
ARHGEF17	5180.75	-0.909646	0.195073	-4.6631	3.1148e-06	1.09235e-05
ARHGEF19	51.9372	1.12595	0.378231	2.97689	0.0029119	0.00616783
ARHGEF25	3074.65	-1.95013	0.237107	-8.2247	1.95682e-16	2.53478e-15
ARHGEF28	1144.05	-1.20218	0.278252	-4.32049	1.5568e-05	4.93161e-05
ARHGEF33	293.594	-1.82681	0.244317	-7.47723	7.59041e-14	7.18148e-13
ARHGEF39	34.7024	2.21116	0.575119	3.8447	0.000120698	0.000330689
ARHGEF4	6805.61	-1.09319	0.168194	-6.4996	8.05344e-11	5.2523e-10
ARHGEF40	2826.22	2.05154	0.284719	7.2055	5.78298e-13	4.88464e-12
ARHGEF5	35.5658	2.48797	0.577176	4.3106	1.62811e-05	5.14014e-05
ARHGEF6	4238.71	1.81064	0.179681	10.077	6.98414e-24	2.04133e-22
ARHGEF7	8764.27	-0.479157	0.155902	-3.07344	0.00211604	0.00461326
ARHGEF7-IT1	41.6462	-1.13532	0.420208	-2.70182	0.00689613	0.0134934
ARHGEF9	10082.9	-1.89824	0.299649	-6.33487	2.37534e-10	1.46096e-09
ARID2	2538.16	0.665916	0.123573	5.38884	7.0912e-08	3.17343e-07
ARID3A	322.282	0.634728	0.198869	3.19169	0.00141441	0.00318907
ARID3B	213.165	0.529429	0.239844	2.20739	0.0272867	0.0463907
ARID3C	26.7236	-1.70455	0.515368	-3.30744	0.000941536	0.00219582
ARID4A	2653.38	-0.425549	0.114739	-3.70884	0.000208213	0.000546348
ARID5A	964.121	1.7844	0.276676	6.44942	1.12277e-10	7.16623e-10
ARID5B	4274.04	-0.466599	0.181712	-2.5678	0.0102347	0.0193259
ARIH1	5894.54	-0.600019	0.117331	-5.1139	3.15574e-07	1.28719e-06
ARIH2	3940.68	0.379225	0.12092	3.13616	0.00171176	0.00379971
ARIH2OS	60.09	0.789494	0.213313	3.7011	0.000214663	0.000562201
ARL1	2977.57	-0.754877	0.258704	-2.91792	0.00352378	0.0073315
ARL10	2163.14	-0.953878	0.240163	-3.97179	7.1336e-05	0.000202702
ARL11	67.5378	3.38566	0.363151	9.32301	1.1309e-20	2.36675e-19
ARL13B	602.602	0.579393	0.122353	4.73541	2.18613e-06	7.8563e-06
ARL14EP	1449.67	-0.657308	0.223101	-2.94623	0.00321673	0.00674429
ARL15	733.328	-0.942802	0.21045	-4.47994	7.46656e-06	2.47824e-05
ARL3	1718.75	-1.20808	0.210919	-5.72768	1.01815e-08	5.08214e-08
ARL5B	1637.77	-0.665536	0.232513	-2.86236	0.00420503	0.00861248
ARL6	789.655	-1.51859	0.287326	-5.28527	1.25521e-07	5.44378e-07
ARL6IP1	11514.9	-0.807801	0.299703	-2.69534	0.00703173	0.0137275
ARL6IP4	71.9683	0.539645	0.221759	2.43347	0.0149548	0.0271647
ARL6IP6	466.002	1.27057	0.21334	5.95558	2.59143e-09	1.40722e-08
ARL8A	2189.82	0.461869	0.200919	2.29878	0.0215174	0.0375264
ARL8B	5450.85	-0.997157	0.269787	-3.69609	0.000218946	0.000572762
ARMC1	2176.26	-0.707282	0.257505	-2.74668	0.00602023	0.0119346
ARMC2	1056.81	-1.33376	0.22719	-5.87065	4.34082e-09	2.28502e-08
ARMC3	153.232	1.74266	0.711241	2.45017	NA	NA
ARMC5	538.484	-0.513532	0.195266	-2.62991	0.0085407	0.0163896
ARMC6	956.681	0.478621	0.199231	2.40235	0.0162902	0.0293143
ARMC9	1478.85	-0.950791	0.218447	-4.3525	1.34593e-05	4.30593e-05
ARMCX6	375.747	1.86046	0.27432	6.78207	1.18469e-11	8.53563e-11
ARNT	2154.89	0.32926	0.117563	2.80071	0.00509907	0.0102663
ARNT2	18067	-1.37055	0.211792	-6.47119	9.72317e-11	6.2504e-10
ARNTL	1887.86	-1.12651	0.112741	-9.99209	1.65067e-23	4.65322e-22
ARNTL2	1352.98	-1.43777	0.28564	-5.0335	4.81594e-07	1.91146e-06
ARPC1B	1034.84	2.82615	0.318292	8.87909	6.74117e-19	1.16113e-17
ARPC2	4390.55	0.590022	0.201773	2.92419	0.00345353	0.00719907
ARPC3	3106.71	0.657585	0.266305	2.46929	0.0135382	0.0248298
ARPC4	2002.09	0.947665	0.217541	4.35627	1.323e-05	4.23717e-05
ARPC5	2985	1.21878	0.256342	4.7545	1.98939e-06	7.19184e-06
ARPC5L	1192.41	-0.899651	0.27586	-3.26126	0.00110919	0.00255106
ARPIN	1804.89	0.749197	0.130766	5.72932	1.00836e-08	5.03694e-08
ARPP19	17264.6	-1.32232	0.304348	-4.34477	1.39424e-05	4.4474e-05
ARPP21	5802.88	-2.73109	0.249214	-10.9588	6.0267e-28	2.52766e-26
ARRB1	3915.67	-1.78793	0.198682	-8.99895	2.27877e-19	4.13565e-18
ARRB2	1943.69	0.682358	0.25262	2.70112	0.00691056	0.0135165
ARRDC1-AS1	425.648	0.582472	0.142408	4.09015	4.31092e-05	0.000127262
ARRDC2	1570.35	1.15192	0.5037	2.28691	0.0222011	0.0385849
ARRDC3	3883.57	1.60636	0.284484	5.64658	1.63669e-08	7.96725e-08
ARRDC3-AS1	45.5782	0.661646	0.292891	2.25902	0.0238822	0.0411806
ARRDC4	3376.85	2.25301	0.281632	7.99984	1.24578e-15	1.47148e-14
ARSA	987.815	0.494352	0.226176	2.1857	0.0288377	0.0487319
ARSB	1090.1	0.751798	0.142769	5.26584	1.3955e-07	6.00673e-07
ARSD	1039.27	2.0791	0.276097	7.53033	5.06125e-14	4.89175e-13
ARSE	107.302	1.6097	0.349962	4.59965	4.23197e-06	1.45715e-05
ARSG	569.989	-0.531695	0.18709	-2.84192	0.00448432	0.00913328
ARSI	95.9434	1.44478	0.42849	3.37179	0.000746819	0.00177337
ARSJ	373.865	1.08227	0.44927	2.40895	0.0159987	0.0288527
ARSK	321.938	-0.567377	0.216056	-2.62606	0.00863795	0.0165501
ART3	426.627	-1.4207	0.413894	-3.43253	0.000597972	0.00144707
ARX	230.102	-2.53297	0.348424	-7.2698	3.60008e-13	3.10827e-12
AS3MT	25.9126	1.07079	0.396321	2.70182	0.00689603	0.0134934
ASAH1	6110.93	1.50123	0.272668	5.5057	3.67709e-08	1.71241e-07
ASAH2	67.0364	-1.32121	0.392569	-3.36556	0.000763888	0.00180953
ASAH2B	226.477	-1.36091	0.365839	-3.71998	0.000199241	0.000524339
ASAP1	4241.94	-0.643304	0.118672	-5.42088	5.93078e-08	2.68616e-07
ASAP2	2594.9	-0.596052	0.184914	-3.22339	0.00126682	0.00288053
ASAP3	1475.81	0.670011	0.301489	2.22234	0.0262603	0.0448577
ASB1	3012.16	-0.312817	0.130254	-2.40159	0.016324	0.0293675
ASB13	1055.08	-0.666515	0.244724	-2.72354	0.0064586	0.0127169
ASB16-AS1	164.208	0.738456	0.276756	2.66826	0.00762461	0.0147717
ASB2	272.496	-2.69095	0.298341	-9.0197	1.88597e-19	3.4593e-18
ASB6	1503.45	-0.311534	0.135505	-2.29905	0.0215019	0.0375025
ASB9	25.6999	2.6508	0.357296	7.41907	1.17942e-13	1.09038e-12
ASCC1	1036.04	0.432454	0.157677	2.74265	0.00609452	0.0120674
ASCC2	1075.81	1.13298	0.175865	6.44234	1.17647e-10	7.49275e-10
ASCC3	4091.11	0.971776	0.142737	6.80814	9.88712e-12	7.21686e-11
ASCL1	509.001	1.07842	0.481486	2.23978	0.0251053	0.043045
ASF1B	106.459	5.64051	0.614555	9.1782	4.38375e-20	8.68959e-19
ASGR1	147.993	-1.23019	0.338635	-3.63279	0.000280376	0.000720672
ASH1L	17176	-0.901854	0.107976	-8.35233	6.69309e-17	9.15254e-16
ASH2L	1498.69	-0.3521	0.160888	-2.18848	0.0286348	0.0484247
ASIC2	702.453	-3.19211	0.347807	-9.17781	4.39949e-20	8.71239e-19
ASIC3	217.223	-0.751582	0.320535	-2.34478	0.0190385	0.0336323
ASIC4	1121.72	3.0008	0.4073	7.36753	1.73813e-13	1.56964e-12
ASL	646.052	0.670507	0.136141	4.9251	8.43191e-07	3.23106e-06
ASMTL-AS1	233.699	-1.8113	0.379462	-4.77333	1.81202e-06	6.59688e-06
ASNA1	1595.26	0.59576	0.259438	2.29635	0.0216559	0.0377297
ASPDH	272.004	-2.33751	0.336998	-6.93628	4.02567e-12	3.07894e-11
ASPH	7551.9	-0.478912	0.166687	-2.87313	0.00406433	0.00834003
ASPHD1	1223.63	-1.08486	0.394531	-2.74974	0.00596424	0.0118316
ASPHD2	667.97	-1.57396	0.342003	-4.6022	4.18058e-06	1.44113e-05
ASPM	811.014	5.5267	0.624559	8.84897	8.83316e-19	1.50514e-17
ASPN	49.8161	2.12194	0.531345	3.99353	6.50971e-05	0.000186308
ASRGL1	2217.49	-0.673658	0.223294	-3.0169	0.0025537	0.00547543
ASS1	1078.27	-1.02948	0.368881	-2.79082	0.00525749	0.0105523
ASTE1	392.083	0.9016	0.137043	6.57896	4.73764e-11	3.19064e-10
ASTN1	9532.73	-1.21364	0.260466	-4.65948	3.17006e-06	1.11003e-05
ASUN	893.465	1.18905	0.174655	6.80797	9.89852e-12	7.22263e-11
ASXL1	3670.12	0.405533	0.116	3.49597	0.000472344	0.00116338
ASXL3	1923.09	-1.59	0.267012	-5.9548	2.60393e-09	1.41289e-08
ATAD1	3224.84	-0.929861	0.282723	-3.28895	0.00100562	0.00233
ATAD2B	2201.3	0.758816	0.151121	5.02125	5.13363e-07	2.02703e-06
ATAD5	393.249	1.08348	0.37205	2.9122	0.00358894	0.00745424
ATCAY	10283.8	-1.29913	0.463114	-2.80521	0.00502835	0.0101378
ATE1	3344.74	-0.983596	0.210329	-4.67646	2.91874e-06	1.02919e-05
ATF2	4405.17	-0.805956	0.19706	-4.0899	4.31555e-05	0.00012738
ATF3	832.93	3.60656	0.434946	8.29197	1.1139e-16	1.48196e-15
ATF4	5040.87	0.898826	0.231643	3.88022	0.000104362	0.000289177
ATF5	333.38	1.28879	0.290435	4.43744	9.10348e-06	2.98934e-05
ATF6	3882.77	0.400041	0.147023	2.72093	0.00650977	0.0128091
ATF7IP	6098.78	0.937413	0.150894	6.21241	5.21797e-10	3.08165e-09
ATF7IP2	696.123	-1.38936	0.304565	-4.56178	5.07216e-06	1.72287e-05
ATG14	1411	0.450808	0.173058	2.60496	0.0091886	0.0175228
ATG16L1	2042.53	-0.316172	0.125268	-2.52396	0.011604	0.0216119
ATG2A	1608.01	-0.555378	0.187594	-2.96054	0.00307104	0.00646972
ATG2B	6937.68	-0.498673	0.164626	-3.02913	0.0024526	0.00527786
ATG3	1404.86	0.737009	0.219769	3.35356	0.000797792	0.00188487
ATG4A	384.403	0.991187	0.187538	5.28527	1.25522e-07	5.44378e-07
ATG4B	2376.32	-0.36114	0.140982	-2.5616	0.0104192	0.0196275
ATG5	1618.73	-0.581003	0.208848	-2.78194	0.00540345	0.010819
ATG9A	3380.11	-0.618482	0.137855	-4.48647	7.2412e-06	2.40771e-05
ATHL1	524.086	1.11671	0.417741	2.67321	0.0075129	0.0145854
ATIC	1070.77	-0.544907	0.126763	-4.29865	1.71843e-05	5.40794e-05
ATL1	4424.97	-1.78146	0.341815	-5.21178	1.87042e-07	7.89769e-07
ATL2	2215	-1.2234	0.168704	-7.25177	4.11364e-13	3.5222e-12
ATL3	2906.03	1.03561	0.169484	6.11035	9.94144e-10	5.69048e-09
ATM	9127.66	0.836258	0.216166	3.86858	0.000109469	0.000302153
ATN1	3463.37	-1.9697	0.315278	-6.2475	4.17068e-10	2.49238e-09
ATOH7	44.778	-3.63827	0.484925	-7.50275	6.24943e-14	5.9813e-13
ATOH8	483.205	1.46103	0.309566	4.71962	2.36287e-06	8.45755e-06
ATOX1	934.254	0.621567	0.179312	3.4664	0.000527472	0.00128824
ATP10B	1943.14	2.38577	0.308967	7.72178	1.14717e-14	1.20161e-13
ATP10D	1628.5	1.12044	0.201903	5.54938	2.86689e-08	1.35467e-07
ATP11C	829.46	1.48471	0.227626	6.52262	6.90917e-11	4.54481e-10
ATP13A2	5295.13	-1.7395	0.218952	-7.94466	1.94724e-15	2.25105e-14
ATP13A3	4955.4	0.459742	0.183969	2.49901	0.012454	0.023052
ATP13A5	166.712	1.09063	0.477126	2.28583	0.022264	0.0386813
ATP13A5-AS1	34.3158	1.69656	0.605351	2.8026	0.00506922	0.0102132
ATP1A1	28114.2	-1.12598	0.397789	-2.8306	0.00464614	0.00942983
ATP1A1-AS1	149.334	1.58516	0.287931	5.50534	3.6845e-08	1.71547e-07
ATP1A2	36320	-1.45232	0.332199	-4.37184	1.23206e-05	3.96687e-05
ATP1A3	19325.2	-3.92285	0.471421	-8.32134	8.69776e-17	1.17614e-15
ATP1A4	59.2334	-2.3722	0.508058	-4.66916	3.02433e-06	1.06297e-05
ATP1B1	22448	-2.13294	0.386251	-5.52216	3.3486e-08	1.56473e-07
ATP1B2	6563.86	-1.73928	0.399025	-4.35883	1.30757e-05	4.19363e-05
ATP1B3	2332.12	0.530361	0.229194	2.31402	0.0206664	0.0361859
ATP2A1-AS1	27.9566	1.06893	0.468067	2.2837	0.0223889	0.0388819
ATP2A2	22365.6	-1.22447	0.166245	-7.36548	1.76512e-13	1.59262e-12
ATP2B1	21762.9	-2.66201	0.303559	-8.76935	1.79693e-18	2.94985e-17
ATP2B2	21887.1	-4.40198	0.38642	-11.3917	4.59878e-30	2.27568e-28
ATP2B3	3388.25	-4.81724	0.38648	-12.4644	1.1676e-35	9.52306e-34
ATP2B4	13125.4	-0.659568	0.148651	-4.43701	9.12159e-06	2.99481e-05
ATP2C2	178.28	-2.01668	0.228917	-8.80967	1.25516e-18	2.10549e-17
ATP4A	29.4298	-4.49573	0.700916	-6.41408	1.41677e-10	8.97055e-10
ATP5D	974.687	-0.669408	0.22403	-2.98803	0.00280779	0.00597862
ATP5E	3359.82	0.67565	0.225624	2.99459	0.00274817	0.00586255
ATP5F1P1	51.4096	1.64616	0.327891	5.02044	5.15528e-07	2.03363e-06
ATP5G2	3056.24	0.720987	0.165587	4.35412	1.33602e-05	4.27621e-05
ATP6V0A1	12544.2	-1.64276	0.165591	-9.92058	3.38791e-23	9.19861e-22
ATP6V0A2	1616.9	0.964616	0.180816	5.33479	9.56559e-08	4.22397e-07
ATP6V0A4	60.8862	2.03833	0.613163	3.32429	0.000886451	0.00207556
ATP6V0C	421.461	-0.741119	0.264043	-2.80681	0.00500344	0.0100925
ATP6V0E1	1681.33	2.00848	0.174129	11.5344	8.84822e-31	4.58751e-29
ATP6V0E2-AS1	402.549	1.06525	0.278773	3.82122	0.000132792	0.000360786
ATP6V1A	15380.5	-1.98595	0.325898	-6.09379	1.1027e-09	6.26318e-09
ATP6V1B1	38.6017	4.77057	0.623861	7.64686	2.05951e-14	2.08835e-13
ATP6V1B2	13370.8	-1.20222	0.328748	-3.65697	0.000255215	0.000660526
ATP6V1C1	10027.9	-1.96929	0.293635	-6.7066	1.99217e-11	1.40053e-10
ATP6V1C2	47.2777	-2.1725	0.50132	-4.33355	1.46721e-05	4.6686e-05
ATP6V1D	4034.68	-1.05374	0.30357	-3.47115	0.000518229	0.00126717
ATP6V1E1	6991.46	-1.17944	0.358663	-3.28844	0.00100744	0.00233368
ATP6V1G2	3235.98	-2.75406	0.318522	-8.64637	5.31641e-18	8.32986e-17
ATP6V1H	5036.88	-1.75195	0.27754	-6.31241	2.74722e-10	1.67769e-09
ATP7A	1111.1	1.61066	0.161558	9.96955	2.07164e-23	5.78462e-22
ATP7B	766.35	-0.912662	0.230627	-3.9573	7.5802e-05	0.000214564
ATP8A2	6634.38	-3.23188	0.311362	-10.3798	3.06403e-25	1.00839e-23
ATP8B1	493.386	-0.915969	0.244284	-3.74961	0.000177109	0.000470154
ATP8B2	2257.78	-0.556006	0.215861	-2.57576	0.0100019	0.0189244
ATP8B3	38.9295	1.69387	0.446392	3.79457	0.000147899	0.000398317
ATP8B4	1026.27	1.30311	0.346061	3.76554	0.000166187	0.000443745
ATP9A	25842.1	-1.58188	0.240409	-6.57996	4.70571e-11	3.17017e-10
ATP9B	3731.27	-0.410584	0.116905	-3.51211	0.000444558	0.00110046
ATPAF1	4222.22	-1.34542	0.227392	-5.91676	3.28348e-09	1.75894e-08
ATPIF1	1835.78	-0.624422	0.248452	-2.51326	0.0119623	0.0222179
ATRAID	1282.66	1.81471	0.176616	10.2749	9.14403e-25	2.90288e-23
ATRN	7675.99	-0.551146	0.216341	-2.54758	0.0108473	0.0203392
ATRNL1	44495.7	-3.63373	0.352546	-10.3071	6.5449e-25	2.10365e-23
ATRX	12130.9	-0.488714	0.211279	-2.31312	0.0207162	0.0362638
ATXN1	10550.6	-1.2222	0.130028	-9.39952	5.48135e-21	1.18562e-19
ATXN10	5508.62	-0.780987	0.1898	-4.11479	3.87539e-05	0.000115212
ATXN2	3840.66	-0.872713	0.105816	-8.24745	1.61806e-16	2.11187e-15
ATXN2L	2702.88	-0.893207	0.210299	-4.24731	2.16352e-05	6.68226e-05
ATXN3	2088.55	-0.883456	0.144529	-6.11266	9.79857e-10	5.61337e-09
ATXN7L2	524.639	-0.809705	0.308137	-2.62775	0.0085952	0.0164804
ATXN7L3	6040.26	-1.8887	0.195785	-9.64683	5.06977e-22	1.23076e-20
ATXN7L3B	8365.96	-0.944771	0.247193	-3.82199	0.000132378	0.000359709
AUH	880.484	-0.464048	0.185121	-2.50674	0.0121852	0.0225933
AUP1	2014	1.05332	0.111959	9.40807	5.05322e-21	1.09877e-19
AURKA	249.946	2.39641	0.417643	5.73794	9.58362e-09	4.80345e-08
AURKAPS1	27.2816	1.01693	0.373995	2.71911	0.0065457	0.0128737
AURKB	104.035	6.07304	1.43828	4.22242	2.41689e-05	7.40609e-05
AVIL	3422.25	4.63353	0.993552	4.6636	NA	NA
AXIN2	592.008	-0.717944	0.187544	-3.82814	0.000129117	0.000351355
AXL	2656.35	1.18277	0.359398	3.29098	0.000998393	0.00231507
AZGP1	565.762	2.26059	0.655724	3.44747	0.000565858	0.00137437
AZI2	2059.75	-0.572424	0.165153	-3.46602	0.000528221	0.00128977
B2M	20430.6	2.3348	0.407154	5.73444	9.78374e-09	4.89899e-08
B3GALNT1	1985.66	-0.854692	0.302417	-2.8262	0.00471037	0.00954329
B3GALT1	989.565	-1.87924	0.311826	-6.02658	1.6747e-09	9.31719e-09
B3GALT2	1617	-2.2443	0.340384	-6.59344	4.29738e-11	2.90743e-10
B3GALT5	392.609	0.630895	0.270143	2.33541	0.0195221	0.0343925
B3GALT5-AS1	79.5399	1.15742	0.294099	3.93548	8.3031e-05	0.000233808
B3GALTL	1001.46	-0.609917	0.220144	-2.77054	0.00559632	0.0111618
B3GAT1	9547.36	-0.76172	0.175393	-4.34294	1.40587e-05	4.48241e-05
B3GNT4	215.566	-3.42247	0.344005	-9.94892	2.54946e-23	7.05201e-22
B3GNT5	526.983	3.14775	0.304041	10.353	4.05398e-25	1.32155e-23
B3GNT7	524.985	2.33199	0.35849	6.50502	7.76813e-11	5.07585e-10
B3GNT9	438.901	1.60014	0.226351	7.06929	1.55731e-12	1.24894e-11
B4GALNT1	2561.58	-1.88282	0.346955	-5.4267	5.74069e-08	2.60407e-07
B4GALNT3	563.765	-1.54683	0.514534	-3.00628	0.00264467	0.00565403
B4GALNT4	2626.07	-1.27759	0.323509	-3.94917	7.8423e-05	0.000221437
B4GALT1	523.496	2.29675	0.385209	5.96235	2.48636e-09	1.35658e-08
B4GALT4	764.495	0.950926	0.138579	6.86199	6.79079e-12	5.04238e-11
B4GALT6	2185.72	-2.47696	0.397815	-6.22643	4.77188e-10	2.83279e-09
B4GALT7	683.206	0.505422	0.167654	3.01468	0.0025725	0.0055123
B4GAT1	5696.6	-1.72951	0.317268	-5.45125	5.00179e-08	2.28801e-07
BAALC-AS2	53.84	1.0256	0.327426	3.1323	0.00173442	0.0038453
BAAT	75.6947	-1.42837	0.422924	-3.37736	0.000731853	0.00174124
BACH1	3148.43	0.594821	0.133278	4.46302	8.0812e-06	2.66937e-05
BACH1-IT1	67.1	1.79049	0.241996	7.39886	1.37356e-13	1.25971e-12
BACH1-IT2	68.8146	1.81309	0.332635	5.4507	5.01722e-08	2.29405e-07
BAG2	402.671	-0.786061	0.149436	-5.26019	1.43903e-07	6.17349e-07
BAG4	2926.04	-1.72028	0.235686	-7.29904	2.89836e-13	2.53315e-12
BAHCC1	1615.59	-0.794098	0.236988	-3.35079	0.000805804	0.00190205
BAHD1	1078.58	-0.556849	0.202619	-2.74826	0.00599129	0.0118818
BAI1	3057.49	-1.50749	0.439732	-3.42819	0.000607614	0.00146816
BAI2	7322	-1.92899	0.284769	-6.77388	1.25374e-11	8.99857e-11
BAI3	10321.9	-1.98008	0.227122	-8.71813	2.82841e-18	4.5526e-17
BAIAP2	2985.7	-1.68981	0.220711	-7.6562	1.91522e-14	1.9526e-13
BAIAP2-AS1	1935.59	-1.43574	0.286794	-5.00616	5.55264e-07	2.17872e-06
BAIAP2L2	104.082	-2.44485	0.362677	-6.74112	1.57173e-11	1.11837e-10
BAIAP3	4644.34	-2.36172	0.384257	-6.1462	7.93625e-10	4.58083e-09
BAK1	380.862	1.03457	0.179885	5.75131	8.85538e-09	4.46338e-08
BAMBI	625.842	2.74674	0.277413	9.90126	4.11069e-23	1.10592e-21
BANF1	676.552	1.03634	0.17829	5.81268	6.14823e-09	3.16618e-08
BAP1	4580.83	-1.02173	0.198647	-5.14347	2.69716e-07	1.11289e-06
BARD1	1057.75	1.35689	0.192649	7.0433	1.87735e-12	1.49283e-11
BASP1	6671.16	-2.58377	0.311791	-8.28687	1.16268e-16	1.54587e-15
BATF2	98.3622	1.34731	0.586803	2.29601	0.0216752	0.0377569
BATF3	152.683	0.883716	0.349172	2.53089	0.0113773	0.0212289
BAX	618.657	1.93683	0.159567	12.138	6.6392e-34	4.62837e-32
BAZ1A	1070.31	1.74078	0.316568	5.49891	3.82154e-08	1.77527e-07
BAZ1B	7070.89	0.50469	0.189744	2.65985	0.00781751	0.0151231
BAZ2A	3565.43	-0.462522	0.191099	-2.42032	0.0155068	0.0280588
BBOX1	643.425	0.795442	0.336315	2.36517	0.0180218	0.0320228
BBS1	388.326	-0.754713	0.253983	-2.97151	0.00296335	0.00626395
BBS12	387.652	-0.537702	0.243019	-2.21259	0.0269257	0.0458578
BBS7	2134.36	-1.38442	0.245126	-5.6478	1.62515e-08	7.91294e-08
BBX	5495.24	0.79505	0.20508	3.87678	0.000105849	0.000293062
BCAN	12074.2	2.68823	0.460562	5.83685	5.31978e-09	2.76508e-08
BCAP29	3415.36	-0.98269	0.241469	-4.06962	4.70893e-05	0.000138122
BCAS1	15220	1.20026	0.42211	2.84349	0.0044623	0.00909517
BCAS2	1370.16	-0.668384	0.304852	-2.19248	0.0283445	0.0479929
BCAS4	1490.19	-2.36606	0.269115	-8.792	1.46925e-18	2.4391e-17
BCAT1	4528.88	0.694499	0.304492	2.28084	0.0225579	0.039149
BCDIN3D	224.527	1.0198	0.16932	6.02292	1.71295e-09	9.50949e-09
BCDIN3D-AS1	239.964	-1.86826	0.165074	-11.3177	1.07251e-29	5.12299e-28
BCHE	749.816	2.91038	0.411601	7.07088	1.53954e-12	1.23565e-11
BCKDHA	105.57	0.436381	0.194417	2.24456	0.0247962	0.042593
BCKDK	1079.1	0.425738	0.1891	2.25139	0.0243609	0.0419395
BCL10	430.991	0.751324	0.11436	6.5698	5.03819e-11	3.38201e-10
BCL11A	1265.54	-3.65029	0.424307	-8.60294	7.76977e-18	1.19917e-16
BCL11B	732.312	-2.90948	0.172375	-16.8788	6.44501e-64	3.5944e-61
BCL2A1	137.684	4.16192	0.697327	5.96838	2.39615e-09	1.31014e-08
BCL2L11	524.457	1.72189	0.243062	7.08418	1.39875e-12	1.12747e-11
BCL2L12	56.2956	2.15775	0.311343	6.93046	4.19467e-12	3.19989e-11
BCL2L13	4840.94	-0.584314	0.157132	-3.71862	0.000200314	0.000526826
BCL2L2	5704.7	-1.47525	0.268532	-5.49376	3.93463e-08	1.82493e-07
BCL3	155.762	1.41989	0.524507	2.70709	0.00678752	0.0133036
BCL6	3687.75	1.08328	0.315483	3.43371	0.000595388	0.00144149
BCL6B	267.541	1.35282	0.422694	3.20047	0.00137204	0.003102
BCL7A	1600.91	-1.23225	0.25863	-4.76453	1.89296e-06	6.86852e-06
BCL7C	703.767	1.40571	0.199846	7.03396	2.00749e-12	1.59019e-11
BCL9L	1086.76	-0.845671	0.283709	-2.98077	0.00287526	0.00610275
BCO2	597.344	-0.932464	0.336724	-2.76923	0.00561894	0.0112026
BCOR	1404.16	0.703345	0.286144	2.45801	0.0139708	0.0255619
BCORL1	517.934	-0.931372	0.232455	-4.00667	6.15814e-05	0.000177056
BCR	5315.19	-1.22052	0.169407	-7.20466	5.81902e-13	4.91107e-12
BCRP3	46.2872	-0.952463	0.421194	-2.26134	0.0237381	0.0409561
BCS1L	628.762	0.707341	0.146165	4.83933	1.30276e-06	4.84195e-06
BCYRN1	2561.98	-1.75422	0.30257	-5.79775	6.72118e-09	3.43636e-08
BDH1	1702.41	-1.49816	0.17592	-8.51617	1.64923e-17	2.44482e-16
BDH2	929.636	0.615368	0.176134	3.49375	0.000476288	0.00117226
BDKRB2	123.928	2.28836	0.434058	5.27201	1.34939e-07	5.82979e-07
BDNF-AS	278.639	0.653724	0.18099	3.61193	0.000303921	0.000776165
BDP1	8313.99	-0.700848	0.104841	-6.68485	2.31166e-11	1.61153e-10
BEAN1	205.344	-0.759879	0.59733	-1.27213	NA	NA
BEGAIN	970.734	-2.53517	0.325802	-7.78133	7.17638e-15	7.72079e-14
BEND3	212.813	0.871442	0.313457	2.7801	0.00543417	0.0108731
BEND4	256.582	-3.01969	0.438749	-6.88251	5.88071e-12	4.40147e-11
BEND5	572.268	-1.04827	0.301948	-3.47168	0.000517222	0.00126501
BEND6	1827.96	-1.83649	0.244648	-7.50666	6.06527e-14	5.81044e-13
BEST1	1580.75	2.34563	0.436968	5.36797	7.96296e-08	3.54664e-07
BEST3	420.689	3.20472	0.410447	7.80788	5.81577e-15	6.32955e-14
BEX1	4980.24	-1.39201	0.45285	-3.07388	0.00211294	0.00460698
BEX2	2550.77	-1.90649	0.412936	-4.61691	3.89501e-06	1.3481e-05
BEX4	4603.7	-1.03766	0.311747	-3.32852	0.000873085	0.00204659
BEX5	1286.13	-3.33046	0.454437	-7.32876	2.32288e-13	2.05807e-12
BFAR	1290.08	0.650405	0.128902	5.04574	4.51759e-07	1.80007e-06
BFSP1	121.906	-1.6609	0.409911	-4.05185	5.08144e-05	0.00014829
BGN	947.98	1.64854	0.472555	3.48857	0.000485618	0.00119365
BHLHB9	2363.23	-1.22256	0.248881	-4.91224	9.0043e-07	3.43128e-06
BHLHE22	182.36	-2.62611	0.462637	-5.6764	1.3756e-08	6.76904e-08
BHLHE40-AS1	57.4397	-0.818834	0.299257	-2.73622	0.00621489	0.0122839
BHMT	33.8255	-2.8842	0.77604	-3.71656	0.000201952	0.000530796
BICC1	470.792	-0.928526	0.333046	-2.78798	0.00530371	0.0106389
BICD1	3613.49	-0.452102	0.140062	-3.22787	0.00124716	0.00284044
BIN2	413.969	2.66724	0.360893	7.39066	1.46099e-13	1.33573e-12
BIRC5	347.854	6.632	0.668617	9.91898	3.44257e-23	9.33474e-22
BIRC6	17702.3	0.282918	0.0954838	2.96299	0.00304664	0.00642356
BIVM	1167.85	-0.391368	0.164889	-2.37353	0.017619	0.0314179
BLACAT1	59.0256	-1.74913	0.28301	-6.18047	6.39104e-10	3.7275e-09
BLCAP	3888.99	-0.987092	0.161737	-6.10308	1.04043e-09	5.93404e-09
BLID	58.1251	1.77588	0.488854	3.63274	0.000280433	0.000720729
BLM	691.166	2.17819	0.284905	7.64532	2.08423e-14	2.11134e-13
BLMH	1161.45	0.83886	0.167691	5.00241	5.66184e-07	2.21903e-06
BLNK	254.383	2.14113	0.359264	5.95977	2.52593e-09	1.37522e-08
BLOC1S1	822.237	0.942525	0.234432	4.02046	5.80847e-05	0.000167821
BLOC1S4	217.659	0.737841	0.202381	3.6458	0.000266561	0.000687843
BLOC1S5	466.964	0.558346	0.093205	5.99052	2.09176e-09	1.15102e-08
BLOC1S6	3355.38	-0.74443	0.248848	-2.9915	0.00277608	0.00591659
BMF	329.749	3.32632	0.337284	9.86209	6.07682e-23	1.60557e-21
BMP1	739.666	1.95228	0.308895	6.3202	2.61219e-10	1.59948e-09
BMP2	235.163	1.45678	0.273238	5.33154	9.73822e-08	4.29468e-07
BMP2K	4416.54	1.5661	0.305239	5.13074	2.88603e-07	1.1849e-06
BMP3	73.7219	-2.72031	0.57088	-4.76511	1.88749e-06	6.85349e-06
BMP7	1810.53	0.989706	0.268183	3.69042	0.000223884	0.000585087
BMP8B	443.266	2.339	0.340006	6.87931	6.01446e-12	4.49343e-11
BMPR1B	1744.17	-1.25738	0.365653	-3.43872	0.000584463	0.00141637
BMPR2	11112.4	-1.56306	0.188457	-8.29399	1.09514e-16	1.45889e-15
BMS1	2629.35	-0.306965	0.133035	-2.3074	0.0210326	0.0367679
BNC2	307.734	3.19432	0.300723	10.6221	2.35144e-26	8.63381e-25
BNIP1	294.5	0.650323	0.247413	2.62849	0.00857652	0.0164522
BNIP2	2381.52	0.73347	0.176377	4.15854	3.20292e-05	9.63584e-05
BNIP3	3487.39	-1.12099	0.234716	-4.77593	1.78881e-06	6.51695e-06
BNIP3P32	28.9867	-4.69778	0.860634	-5.45851	4.80135e-08	2.19973e-07
BOC	1114.58	1.0251	0.351547	2.91597	0.00354589	0.00737373
BOD1	1295.72	0.466878	0.181603	2.57087	0.0101444	0.0191746
BOLA1	266.505	0.536386	0.238788	2.24628	0.0246859	0.0424318
BOLA3	335.169	-0.553979	0.197923	-2.79896	0.00512667	0.0103128
BOLA3-AS1	352.045	-1.21756	0.187721	-6.48603	8.81296e-11	5.70258e-10
BOP1	975.068	0.73391	0.286323	2.56322	0.0103705	0.0195465
BORA	153.592	1.99456	0.285677	6.98185	2.91315e-12	2.26073e-11
BPGM	800.387	0.728597	0.290302	2.50979	0.0120804	0.0224192
BPNT1	715.602	0.48112	0.174572	2.756	0.00585134	0.0116255
BRAF	6787.35	-1.11111	0.236058	-4.70695	2.51449e-06	8.9676e-06
BRAT1	1346.38	1.09024	0.20442	5.33334	9.64232e-08	4.25512e-07
BRCA1	809.485	1.6568	0.260216	6.36702	1.92733e-10	1.20189e-09
BRCA2	294.111	3.49816	0.412576	8.47883	2.27468e-17	3.30085e-16
BRCC3P1	44.3574	-1.45027	0.589294	-2.46104	0.0138536	0.0253678
BRD4	2968.85	-1.0706	0.249164	-4.29677	1.73302e-05	5.44719e-05
BRD7	2513.27	0.812873	0.134399	6.04822	1.46457e-09	8.21013e-09
BRD9P2	52.6922	-1.07224	0.389291	-2.75434	0.00588114	0.0116802
BRF1	2244.8	-0.526849	0.150996	-3.48915	0.00048456	0.00119134
BRI3	869.855	1.1522	0.157807	7.30133	2.84943e-13	2.49144e-12
BRI3BP	2933	-1.48142	0.208211	-7.11498	1.11932e-12	9.13293e-12
BRINP1	3494.04	-1.71575	0.368726	-4.65319	3.26833e-06	1.14212e-05
BRINP2	2926.04	-1.14483	0.339282	-3.37428	0.000740084	0.00175859
BRIP1	278.81	2.05071	0.560703	3.6574	0.000254791	0.00065951
BRMS1	660.765	1.38376	0.13572	10.1957	2.07259e-24	6.40237e-23
BRMS1L	806.661	-1.33017	0.235235	-5.65466	1.56158e-08	7.61416e-08
BRPF1	1056.04	0.548013	0.138279	3.9631	7.39823e-05	0.000209759
BRPF3	2168.49	-1.24567	0.139638	-8.92071	4.63307e-19	8.10886e-18
BRSK1	6422.9	-1.8258	0.18905	-9.65779	4.55575e-22	1.10858e-20
BRSK2	3061.8	-1.98162	0.255125	-7.76724	8.02126e-15	8.5761e-14
BRWD1	12063.5	-0.542319	0.130868	-4.14403	3.41258e-05	0.000102293
BSCL2	834.5	-0.830198	0.33853	-2.45237	0.0141921	0.02593
BSN	22231.7	-4.56237	0.371202	-12.2908	1.01489e-34	7.56035e-33
BSPRY	87.8128	-1.75455	0.469255	-3.73901	0.000184746	0.000488748
BST1	98.0571	1.94626	0.326467	5.96159	2.49794e-09	1.3611e-08
BST2	690.008	1.59721	0.411032	3.88585	0.000101971	0.000283085
BTBD10	4036.56	-1.39221	0.256856	-5.4202	5.95329e-08	2.69518e-07
BTBD11	943.65	-1.11129	0.422449	-2.63059	0.00852367	0.0163604
BTBD17	101.19	2.56777	0.641468	4.00295	6.25569e-05	0.000179561
BTBD19	271.578	1.89622	0.361227	5.24938	1.52616e-07	6.52285e-07
BTBD2	3264.67	-0.779801	0.19708	-3.95676	7.5972e-05	0.000214987
BTBD3	7352.29	-0.985129	0.352129	-2.79763	0.00514785	0.0103504
BTBD6	1868.68	-1.05394	0.216365	-4.87112	1.10969e-06	4.17019e-06
BTBD7	2395.06	-0.222475	0.0860014	-2.58687	0.00968517	0.018381
BTBD8	449.603	-0.664231	0.280677	-2.36654	0.0179554	0.0319213
BTBD9	4957.98	-1.90646	0.150557	-12.6627	9.51721e-37	8.39264e-35
BTC	59.1728	-1.07238	0.430591	-2.49047	0.0127573	0.023561
BTD	685.473	0.477008	0.165305	2.88563	0.00390631	0.00803977
BTF3	4075.99	0.715831	0.21257	3.36751	0.000758509	0.00179823
BTG1	1926.06	1.61919	0.203412	7.96015	1.71826e-15	1.9998e-14
BTG2	3211.36	3.18859	0.381416	8.35989	6.27764e-17	8.6187e-16
BTG3	400.763	2.10104	0.241496	8.7001	3.31581e-18	5.29171e-17
BTK	340.732	3.11417	0.363027	8.57832	9.62647e-18	1.46491e-16
BTN2A1	1245.69	0.566385	0.158774	3.56723	0.000360773	0.000908427
BTN2A2	469.138	2.41587	0.337248	7.16348	7.86543e-13	6.53132e-12
BTN2A3P	125.739	2.12833	0.44168	4.81872	1.4448e-06	5.32765e-06
BTN3A1	1294.33	1.56012	0.522562	2.98552	0.002831	0.00602058
BTN3A2	1342.19	2.16294	0.681958	3.17167	0.00151567	0.00339771
BTN3A3	997.249	1.04009	0.43854	2.37171	0.0177061	0.0315432
BTNL9	442.272	-1.35839	0.312397	-4.34828	1.3721e-05	4.38081e-05
BTRC	4507.3	-1.45102	0.204148	-7.10766	1.18024e-12	9.59208e-12
BUB1	350.964	5.06261	0.593623	8.52832	1.4849e-17	2.21714e-16
BUB1B	248.061	4.05731	0.517996	7.83271	4.77464e-15	5.26027e-14
BUB3	2387.33	0.487599	0.212214	2.29768	0.0215801	0.037623
BUD13	612.02	0.714559	0.149437	4.78167	1.73842e-06	6.33897e-06
BUD31	1329	0.952461	0.250271	3.80572	0.000141395	0.000382146
BVES	539.907	1.85254	0.307659	6.02141	1.729e-09	9.58824e-09
BX255923.3	76.3008	-1.89365	0.606335	-3.1231	0.00178955	0.00395495
BX322557.10	710.555	-0.606527	0.208253	-2.91246	0.00358596	0.00744943
BX842568.2	27.9654	-4.12171	0.498838	-8.26261	1.42521e-16	1.86962e-15
BYSL	309.933	1.08089	0.268478	4.02598	5.6738e-05	0.000164229
BZRAP1	7864.39	-2.58246	0.29401	-8.78355	1.58396e-18	2.61689e-17
BZRAP1-AS1	152.599	-1.60437	0.213903	-7.50045	6.35998e-14	6.07303e-13
BZW1	3966.97	0.61064	0.255845	2.38676	0.0169977	0.0304231
C10orf11	355.29	1.55956	0.399967	3.89922	9.65029e-05	0.000269136
C10orf111	28.274	-1.59037	0.320509	-4.96203	6.97617e-07	2.70182e-06
C10orf128	331.41	1.9244	0.567118	3.39329	0.000690572	0.00164968
C10orf25	83.5946	0.788135	0.264533	2.97935	0.00288862	0.00612544
C10orf32	793.71	-0.687089	0.288902	-2.37827	0.017394	0.0310676
C10orf35	368.535	-2.35866	0.287323	-8.20909	2.22869e-16	2.86714e-15
C10orf54	2026.43	1.35964	0.37073	3.66748	0.000244956	0.000635407
C10orf82	40.0239	-2.49754	0.446854	-5.58917	2.28155e-08	1.09361e-07
C10orf88	534.919	-0.735497	0.21451	-3.42873	0.000606402	0.00146592
C10orf90	1256.5	1.48923	0.580561	2.56515	0.0103131	0.019456
C11orf24	689.982	1.60736	0.208759	7.69959	1.36506e-14	1.41832e-13
C11orf45	89.7485	1.02416	0.288271	3.55276	0.000381211	0.000954415
C11orf49	2764.75	-0.946369	0.180128	-5.25386	1.48942e-07	6.3777e-07
C11orf54	1204.71	0.325363	0.120561	2.69874	0.00696033	0.0136023
C11orf63	329.371	-0.698585	0.292273	-2.39018	0.0168402	0.03017
C11orf74	511.845	-0.660554	0.19083	-3.46148	0.00053721	0.00130955
C11orf80	658.149	-1.40433	0.244103	-5.75301	8.76702e-09	4.42316e-08
C11orf87	3715.4	-5.60001	0.366832	-15.2659	1.29117e-52	3.50571e-50
C11orf96	393.697	1.93274	0.320801	6.02474	1.69384e-09	9.411e-09
C11orf98	84.1154	0.627772	0.232921	2.69522	0.00703429	0.0137312
C12orf29	1267.91	-1.05676	0.255657	-4.1335	3.57284e-05	0.000106725
C12orf42	27.3857	-1.33126	0.42115	-3.16101	0.00157222	0.00351285
C12orf43	1175.44	-1.03855	0.182277	-5.69763	1.21482e-08	6.00284e-08
C12orf54	41.1808	-1.11328	0.34312	-3.24458	0.00117622	0.00269443
C12orf75	143.51	1.03337	0.323078	3.19853	0.00138128	0.00312085
C12orf79	68.1164	1.97548	0.570369	3.46351	0.000533172	0.00130047
C14orf119	863.144	0.948969	0.243608	3.89548	9.80061e-05	0.000272922
C14orf132	12320	-1.43238	0.238085	-6.01624	1.7851e-09	9.88345e-09
C14orf159	2654.04	-0.650503	0.197378	-3.29573	0.000981669	0.00228065
C14orf169	439.721	-0.515014	0.124979	-4.1208	3.77565e-05	0.000112425
C14orf2	2125.09	-1.0833	0.295225	-3.6694	0.000243122	0.000630888
C14orf80	295.541	0.777987	0.249904	3.11314	0.00185106	0.00407996
C14orf93	223.373	1.24048	0.172209	7.20333	5.87591e-13	4.95705e-12
C15orf27	285.705	-3.47744	0.249199	-13.9545	2.95497e-44	4.61937e-42
C15orf40	1027.29	-0.364829	0.165275	-2.20741	0.0272855	0.0463907
C15orf41	420.396	0.862934	0.163068	5.29188	1.21069e-07	5.26613e-07
C15orf52	560.038	1.30279	0.334421	3.89566	9.79311e-05	0.000272824
C15orf59	2747.5	-1.5917	0.296198	-5.37378	7.71012e-08	3.44071e-07
C15orf61	464.44	-1.6345	0.284753	-5.74005	9.46504e-09	4.75094e-08
C16orf45	5382.18	-1.26403	0.282006	-4.48229	7.38453e-06	2.45339e-05
C16orf46	182.487	-1.19774	0.172046	-6.96172	3.36145e-12	2.58915e-11
C16orf52	2139.77	-1.64736	0.21533	-7.65038	2.00389e-14	2.03595e-13
C16orf54	43.6478	2.8171	0.564028	4.99462	5.89518e-07	2.30523e-06
C16orf71	46.0569	0.849369	0.366311	2.31871	0.0204108	0.0357961
C16orf87	724.336	-0.863277	0.285507	-3.02366	0.00249738	0.00536526
C17orf102	183.732	-3.49803	0.387664	-9.02336	1.82402e-19	3.35161e-18
C17orf107	368.319	-1.5535	0.406832	-3.81854	0.000134246	0.000364399
C17orf51	2033.98	-1.25775	0.231753	-5.42711	5.7275e-08	2.59866e-07
C17orf53	56.8881	2.20892	0.441606	5.00202	5.67322e-07	2.22307e-06
C17orf62	1775.13	1.10679	0.219633	5.03929	4.67272e-07	1.85891e-06
C17orf67	95.5397	-1.18507	0.289409	-4.0948	4.22542e-05	0.000125024
C17orf70	912.474	1.1221	0.235125	4.77233	1.82105e-06	6.62505e-06
C17orf75	1224.98	-1.2513	0.23669	-5.28665	1.24579e-07	5.40742e-07
C17orf85	2537.45	0.302833	0.115354	2.62524	0.00865881	0.0165869
C17orf96	599.178	-2.56047	0.495429	-5.16818	2.36387e-07	9.82049e-07
C17orf97	214.148	-1.06034	0.298314	-3.55443	0.000378803	0.000949077
C18orf25	2297.09	-0.540494	0.119463	-4.52437	6.05762e-06	2.03814e-05
C18orf54	296.066	1.02278	0.368674	2.77421	0.00553361	0.0110485
C19orf12	1858.08	-0.841364	0.159894	-5.26199	1.42502e-07	6.1185e-07
C19orf18	58.0911	1.06864	0.371208	2.8788	0.00399188	0.00820115
C19orf24	292.711	1.07542	0.195169	5.51021	3.58409e-08	1.67061e-07
C19orf26	582.418	-0.800345	0.359118	-2.22864	0.0258376	0.0441869
C19orf38	70.0954	2.01533	0.379662	5.30823	1.10698e-07	4.84464e-07
C19orf40	43.6228	1.74556	0.295622	5.90472	3.53247e-09	1.88499e-08
C19orf43	1777.98	0.588131	0.190237	3.09157	0.001991	0.00436556
C19orf48	553.323	1.95679	0.278198	7.03378	2.01009e-12	1.59165e-11
C19orf53	933.49	0.647158	0.228939	2.82678	0.0047019	0.00952962
C19orf54	103.336	0.848443	0.341718	2.48287	0.0130328	0.0240049
C19orf57	224.748	0.803286	0.323051	2.48656	0.0128984	0.0237897
C19orf68	296.878	-0.870311	0.288482	-3.01686	0.00255407	0.00547567
C1D	534.023	-0.718354	0.230663	-3.1143	0.0018438	0.0040659
C1GALT1C1	449.602	0.691472	0.223329	3.09621	0.00196013	0.00430106
C1orf101	202.591	-0.658466	0.300047	-2.19454	0.0281964	0.047797
C1orf106	205.642	3.55797	0.477703	7.44808	9.47071e-14	8.86697e-13
C1orf112	461.212	1.50936	0.233813	6.45542	1.07922e-10	6.90108e-10
C1orf115	4946.79	-4.34883	0.386318	-11.2571	2.13628e-29	9.83976e-28
C1orf122	1130.39	0.739837	0.275499	2.68544	0.00724343	0.0141048
C1orf123	1220.02	0.372758	0.154305	2.41572	0.0157041	0.028371
C1orf131	333.692	0.792263	0.140064	5.65642	1.54562e-08	7.54529e-08
C1orf145	61.4506	-2.63237	0.578885	-4.54731	5.43349e-06	1.83984e-05
C1orf162	396.004	2.0479	0.416876	4.9125	8.99207e-07	3.42725e-06
C1orf168	40.1138	-0.179779	0.626607	-0.286909	NA	NA
C1orf194	46.8639	0.859853	0.502595	1.71083	NA	NA
C1orf204	313.393	-1.68248	0.304614	-5.52332	3.32648e-08	1.55616e-07
C1orf21	7384.45	-1.69102	0.271412	-6.23046	4.65061e-10	2.76159e-09
C1orf216	4072.05	-1.79691	0.310264	-5.79156	6.97352e-09	3.55656e-08
C1orf226	267.782	1.95062	0.328829	5.93202	2.99235e-09	1.61009e-08
C1orf233	345.998	-2.64081	0.313912	-8.41257	4.01113e-17	5.6115e-16
C1orf52	1109.38	-0.516104	0.185155	-2.78742	0.00531299	0.0106554
C1orf54	267.64	1.01733	0.306396	3.32031	0.000899173	0.0021032
C1orf56	142.439	1.19953	0.185254	6.47507	9.47666e-11	6.10143e-10
C1orf61	13792.1	1.36069	0.367763	3.6999	0.000215686	0.000564734
C1orf64	215.29	-1.037	0.285081	-3.63757	0.000275223	0.000708487
C1orf86	429.908	0.678135	0.273329	2.48102	0.0131006	0.0241194
C1orf87	44.5718	2.37658	0.844447	2.81436	0.00488737	0.00987573
C1orf94	55.9441	2.51991	0.531731	4.73908	2.14695e-06	7.72088e-06
C1orf95	3040.49	-2.93431	0.282533	-10.3857	2.88063e-25	9.5107e-24
C1QA	4064.72	4.64003	0.458306	10.1243	4.31054e-24	1.2891e-22
C1QB	5966.58	4.01349	0.4716	8.51035	1.73403e-17	2.56315e-16
C1QC	3479.57	3.65172	0.446038	8.18702	2.67779e-16	3.42144e-15
C1QL1	1146.77	3.77241	0.471293	8.00439	1.20057e-15	1.42052e-14
C1QL2	165.343	-1.88792	0.501025	-3.76812	0.000164481	0.000439362
C1QL3	1747.98	-4.76164	0.608685	-7.82283	5.16492e-15	5.66905e-14
C1QL4	68.927	5.30036	0.884547	5.99218	2.07049e-09	1.14023e-08
C1QTNF1	673.232	2.44667	0.570175	4.29109	1.77798e-05	5.57841e-05
C1QTNF3	336.802	1.49048	0.251249	5.93228	2.98751e-09	1.60791e-08
C1QTNF4	370.271	-3.62997	0.418505	-8.67368	4.18388e-18	6.62073e-17
C1QTNF6	371.549	1.01471	0.393242	2.58037	0.00986949	0.0187064
C1R	3183.57	3.57046	0.558395	6.39415	1.61439e-10	1.01626e-09
C1RL	892.586	1.38492	0.35137	3.94148	8.09813e-05	0.000228348
C1S	3723.33	2.81495	0.455147	6.1847	6.22201e-10	3.63612e-09
C2	347.564	2.72103	0.319217	8.52408	1.54023e-17	2.29478e-16
C20orf197	24.9047	2.03591	0.488596	4.16685	3.08835e-05	9.32106e-05
C20orf203	155.019	-2.52874	0.393839	-6.42076	1.35597e-10	8.59614e-10
C21orf58	257.52	1.60946	0.426193	3.77637	0.000159129	0.000426113
C21orf62	526.385	5.52266	0.5956	9.27242	1.81975e-20	3.74009e-19
C22orf24	88.9285	-3.30214	0.325805	-10.1353	3.85101e-24	1.15839e-22
C22orf29	1869.64	-1.25996	0.15702	-8.02418	1.02209e-15	1.22336e-14
C22orf39	1416.74	-0.684468	0.142705	-4.79638	1.61562e-06	5.91838e-06
C22orf46	915.46	0.58677	0.238507	2.46018	0.0138869	0.0254219
C2CD2L	1879.31	-1.83828	0.179888	-10.219	1.62967e-24	5.04929e-23
C2CD4C	668.978	-2.88623	0.398015	-7.25158	4.11944e-13	3.52442e-12
C2CD5	4510.58	-0.960121	0.161769	-5.93512	2.93632e-09	1.58325e-08
C2orf15	105.635	-1.27666	0.165606	-7.70898	1.26823e-14	1.32439e-13
C2orf16	53.2538	-1.17219	0.394897	-2.96835	0.00299406	0.00632239
C2orf27A	323.328	0.905658	0.373615	2.42404	0.0153489	0.0277975
C2orf40	74.0218	1.26403	0.333297	3.7925	0.00014914	0.000401605
C2orf43	797.493	0.946688	0.186097	5.08707	3.63642e-07	1.46914e-06
C2orf44	520.085	0.747192	0.214818	3.47826	0.000504684	0.00123728
C2orf50	204.535	-1.28063	0.498643	-2.56823	NA	NA
C2orf68	644.165	1.68012	0.166357	10.0995	5.55365e-24	1.63948e-22
C2orf69	1315.18	-1.09394	0.283414	-3.85985	0.000113458	0.00031241
C2orf71	32.5475	-1.33379	0.403109	-3.30876	0.000937103	0.00218622
C2orf73	48.3972	-0.895401	0.345142	-2.5943	0.00947834	0.0180197
C2orf76	209.871	0.491808	0.13025	3.77586	0.000159455	0.000426874
C2orf80	836.042	-1.39943	0.514635	-2.71927	0.00654258	0.0128688
C2orf88	534.203	1.16249	0.322258	3.60733	0.000309367	0.000789191
C2orf91	33.1187	4.30871	0.664232	6.48674	8.77117e-11	5.68089e-10
C3	27946.4	3.86604	0.433388	8.92052	4.64118e-19	8.11616e-18
C3AR1	901.935	4.15166	0.407371	10.1913	2.16739e-24	6.68522e-23
C3orf14	1032.61	-1.91987	0.296447	-6.47627	9.40149e-11	6.06249e-10
C3orf18	1124.27	-0.673034	0.193708	-3.47448	0.000511852	0.00125321
C3orf33	295.249	-1.20194	0.204517	-5.87696	4.1787e-09	2.20926e-08
C3orf35	150.211	-0.918758	0.24975	-3.67871	0.000234412	0.000610205
C3orf67-AS1	35.503	-3.54543	0.456038	-7.77442	7.57955e-15	8.13757e-14
C3orf80	546.653	-4.70034	0.399487	-11.766	5.84601e-32	3.36023e-30
C4A	1072.01	3.84615	0.672019	5.72327	1.04493e-08	5.20195e-08
C4B	819.026	3.24503	0.644462	5.03525	4.77234e-07	1.89561e-06
C4orf22	42.6374	-2.22164	0.514887	-4.31481	1.59742e-05	5.04711e-05
C4orf46	234.377	1.23166	0.275539	4.47	7.82198e-06	2.58913e-05
C4orf48	179.098	1.23457	0.365301	3.37959	0.000725951	0.0017278
C4orf50	1420.07	-4.47243	0.270843	-16.513	2.95707e-61	1.41905e-58
C5	723.505	1.37073	0.236692	5.79122	6.98754e-09	3.56279e-08
C5AR1	525.839	4.36243	0.596645	7.3116	2.63988e-13	2.31804e-12
C5AR2	161.29	1.76755	0.520656	3.39485	0.00068667	0.00164131
C5orf15	1123.67	0.995771	0.213896	4.6554	3.2336e-06	1.13074e-05
C5orf22	1178.67	-0.617604	0.253609	-2.43526	0.0148811	0.0270404
C5orf24	2575.21	-0.416471	0.171441	-2.42923	0.0151308	0.0274483
C5orf30	1495.08	-1.36846	0.291828	-4.68927	2.74177e-06	9.71936e-06
C5orf42	6449.97	-0.470795	0.123162	-3.82257	0.000132066	0.000358907
C5orf45	1336.41	-0.42905	0.155081	-2.76662	0.00566405	0.0112849
C5orf51	1917.46	-0.409984	0.16333	-2.51015	0.012068	0.0223982
C5orf63	294.677	1.39883	0.333578	4.19342	2.74785e-05	8.34957e-05
C6orf106	6002.85	-1.41473	0.147418	-9.59669	8.2552e-22	1.96478e-20
C6orf118	70.1791	2.15452	0.5328	4.04376	5.26011e-05	0.000153071
C6orf136	569.833	-1.43158	0.131072	-10.9221	9.03491e-28	3.74368e-26
C6orf141	126.027	3.31876	0.839086	3.95521	7.64678e-05	0.00021633
C6orf165	85.7631	-1.02716	0.371975	-2.76136	0.0057561	0.0114506
C6orf211	762.079	-0.812041	0.239208	-3.39471	0.000687016	0.00164195
C6orf223	52.2759	-2.93083	0.846855	-3.46084	0.000538485	0.0013125
C6orf226	68.9017	1.27775	0.335146	3.81252	0.000137557	0.000372701
C6orf47	824.693	0.783835	0.122212	6.41372	1.42012e-10	8.98899e-10
C6orf48	1852.54	1.16909	0.179184	6.52454	6.82103e-11	4.48969e-10
C6orf52	26.9691	1.33451	0.34943	3.8191	0.00013394	0.000363664
C6orf57	524.968	-0.985676	0.226592	-4.35001	1.36131e-05	4.34908e-05
C7	451.879	2.75782	0.63278	4.35825	1.31106e-05	4.2022e-05
C7orf26	788.435	0.818689	0.213822	3.82883	0.000128752	0.000350502
C7orf31	90.1065	1.3321	0.32409	4.11027	3.95198e-05	0.00011737
C7orf43	708.419	0.522504	0.171631	3.04435	0.00233187	0.00504225
C7orf49	1039.14	1.5993	0.201601	7.933	2.13913e-15	2.45774e-14
C7orf55	237.575	1.09344	0.267532	4.08712	4.36755e-05	0.000128823
C7orf55-LUC7L2	1901.91	0.564816	0.224021	2.52127	0.0116933	0.0217615
C7orf57	36.1017	4.80588	0.741839	6.47834	9.27403e-11	5.98404e-10
C7orf61	55.4615	1.24094	0.499142	2.48615	0.0129132	0.0238127
C7orf73	934.487	0.778293	0.226175	3.44111	0.000579336	0.00140494
C8orf22	31.6495	5.22377	1.36563	3.82516	NA	NA
C8orf33	1785.67	0.676346	0.255879	2.64323	0.00821193	0.0158161
C8orf4	603.291	2.34472	0.531755	4.4094	1.03657e-05	3.37057e-05
C8orf46	6598.05	-0.768298	0.315784	-2.43299	0.0149748	0.0271963
C8orf58	190.6	0.910351	0.226003	4.02804	5.62431e-05	0.000162911
C8orf88	71.6865	1.366	0.262163	5.21052	1.88317e-07	7.94826e-07
C9orf106	68.9702	0.720822	0.312526	2.30644	0.0210862	0.0368583
C9orf117	34.0729	2.19037	0.750423	2.91884	0.00351333	0.00731264
C9orf129	156.298	-2.27387	0.438443	-5.18625	2.14571e-07	8.97379e-07
C9orf142	571.972	0.968547	0.193458	5.0065	5.54281e-07	2.1761e-06
C9orf147	51.6568	1.06328	0.35619	2.98514	0.00283446	0.00602607
C9orf156	606.786	0.663627	0.150771	4.40156	1.07476e-05	3.48816e-05
C9orf170	68.4799	1.72653	0.358639	4.8141	1.47863e-06	5.44653e-06
C9orf172	719.008	-3.13534	0.34284	-9.1452	5.9522e-20	1.15544e-18
C9orf24	145.509	-2.0148	0.268689	-7.49864	6.44826e-14	6.15163e-13
C9orf3	2484.74	0.780632	0.207592	3.76042	0.000169629	0.000452175
C9orf40	287.703	-1.05013	0.259489	-4.0469	5.18994e-05	0.000151221
C9orf41	886.861	-1.00907	0.169346	-5.95867	2.54305e-09	1.38276e-08
C9orf47	102.743	1.40924	0.300594	4.68818	2.75643e-06	9.76799e-06
C9orf50	38.6154	1.1935	0.339797	3.51238	0.000444107	0.00109948
C9orf64	478.734	0.827347	0.190302	4.34756	1.37661e-05	4.39386e-05
C9orf69	1170.55	-0.676469	0.215218	-3.14318	0.00167123	0.00371736
C9orf89	655.982	0.640712	0.206168	3.10773	0.00188532	0.00414985
C9orf91	2796.16	-2.22914	0.165165	-13.4964	1.64118e-41	2.07765e-39
CA11	5646.26	-2.80794	0.301313	-9.31898	1.17459e-20	2.45321e-19
CA12	1184.54	3.63473	0.59882	6.06982	1.28056e-09	7.21782e-09
CA14	288.576	1.65204	0.646465	2.5555	0.0106037	0.0199404
CA2	3052.12	1.63113	0.446594	3.65238	0.000259825	0.00067153
CA3	172.847	2.13583	0.450246	4.74369	2.09857e-06	7.55478e-06
CA4	369.88	-2.70562	0.365261	-7.40736	1.2884e-13	1.18635e-12
CA5BP1	438.895	0.928013	0.215944	4.29748	1.7275e-05	5.43151e-05
CA7	182.705	-3.62692	0.445681	-8.13793	4.02091e-16	5.03963e-15
CA9	103.415	4.34966	0.592468	7.3416	2.11054e-13	1.8837e-12
CAB39	6128.83	-0.742564	0.249161	-2.98026	0.00288004	0.00610975
CAB39L	2552.96	-1.1753	0.249239	-4.71557	2.41039e-06	8.6157e-06
CABLES1	2472.55	-2.44256	0.254934	-9.58117	9.59518e-22	2.268e-20
CABLES2	534.15	-1.01254	0.163959	-6.17556	6.59284e-10	3.84194e-09
CABP1	5504.51	-4.54074	0.435908	-10.4167	2.07962e-25	6.96637e-24
CABP4	60.2532	2.24498	0.313925	7.15134	8.59352e-13	7.11016e-12
CABP7	286.703	1.93108	0.413971	4.66477	3.08963e-06	1.08444e-05
CABYR	349.971	-1.18156	0.223051	-5.29723	1.17571e-07	5.12373e-07
CACFD1	637.228	1.1023	0.20194	5.45857	4.79987e-08	2.19954e-07
CACHD1	1965.52	-0.560694	0.252717	-2.21866	0.0265096	0.0452162
CACNA1A	5554.66	-2.48915	0.223662	-11.1291	9.05856e-29	4.02852e-27
CACNA1B	6085.42	-4.46448	0.423318	-10.5464	5.27907e-26	1.88466e-24
CACNA1C	4979.23	-2.5235	0.250543	-10.0721	7.33636e-24	2.1352e-22
CACNA1C-IT3	108.485	-1.16031	0.467139	-2.48387	0.0129962	0.0239455
CACNA1D	2798.83	-1.41611	0.233483	-6.06515	1.31833e-09	7.42255e-09
CACNA1E	9767.52	-3.26049	0.420686	-7.75042	9.15923e-15	9.69234e-14
CACNA1F	62.91	-2.27041	0.294943	-7.69779	1.38439e-14	1.43624e-13
CACNA1G	1770.01	-2.76401	0.347012	-7.96519	1.6497e-15	1.92326e-14
CACNA1I	2731.72	-5.20151	0.377478	-13.7796	3.37914e-43	4.91045e-41
CACNA1S	44.8886	-2.16841	0.557679	-3.88827	0.000100959	0.000280578
CACNA2D1	6209.85	-2.02476	0.340495	-5.94652	2.73905e-09	1.48191e-08
CACNA2D2	790.859	-3.14715	0.333558	-9.43509	3.90661e-21	8.58497e-20
CACNA2D3	2860.95	-3.89544	0.21118	-18.4461	5.60701e-76	5.25912e-73
CACNA2D4	84.9194	2.24047	0.395965	5.65825	1.52921e-08	7.47226e-08
CACNB1	2865.17	-2.46637	0.296235	-8.32572	8.38204e-17	1.13493e-15
CACNB2	2544.33	-2.09799	0.324616	-6.46299	1.02656e-10	6.5725e-10
CACNB3	1907.18	-3.12962	0.32549	-9.6151	6.9041e-22	1.65466e-20
CACNB4	6722.78	-2.37648	0.335803	-7.077	1.47306e-12	1.18644e-11
CACNG2	462.334	-4.68651	0.38489	-12.1762	4.15973e-34	2.95986e-32
CACNG3	1203.6	-5.17287	0.448113	-11.5437	7.94638e-31	4.14075e-29
CACNG4	840.547	1.62384	0.364222	4.45838	8.25802e-06	2.72429e-05
CACNG5	103.9	1.07168	0.443879	2.41434	0.0157636	0.0284661
CACNG7	1181.95	-1.5126	0.240863	-6.27992	3.38751e-10	2.04091e-09
CACNG8	3258.05	-3.44614	0.340686	-10.1153	4.72631e-24	1.40529e-22
CACUL1	4013.16	-0.560855	0.154531	-3.62941	0.000284069	0.000729255
CACYBP	3328.76	-1.34405	0.249084	-5.39597	6.81544e-08	3.05931e-07
CACYBPP2	24.5007	-1.95483	0.386641	-5.05594	4.28265e-07	1.71298e-06
CAD	1803.97	0.426807	0.162497	2.62655	0.0086256	0.0165325
CADM2	13405.8	-2.14579	0.375305	-5.71748	1.08118e-08	5.37594e-08
CADM3	10496.9	-1.29066	0.277254	-4.65515	3.23748e-06	1.13191e-05
CADM4	5017.36	1.02634	0.18931	5.42149	5.91047e-08	2.67755e-07
CADPS	10658.8	-1.29234	0.276633	-4.67168	2.98744e-06	1.0518e-05
CADPS2	5331.78	-3.14727	0.198197	-15.8795	8.7883e-57	2.9729e-54
CAHM	114.168	1.16651	0.282018	4.1363	3.52945e-05	0.000105536
CALB1	659.493	-3.59108	0.640038	-5.61072	2.01483e-08	9.7072e-08
CALB2	468.384	-2.96042	0.453505	-6.52786	6.67151e-11	4.3997e-10
CALCRL	1042.24	1.3043	0.388375	3.35835	0.000784105	0.00185381
CALD1	4755.98	1.69009	0.283495	5.96162	2.49753e-09	1.3611e-08
CALHM1	124.051	-6.12948	0.481507	-12.7298	4.03897e-37	3.65544e-35
CALHM2	292.981	0.915951	0.265295	3.45258	0.000555262	0.00135148
CALM1	93436.7	-2.19818	0.26974	-8.14924	3.66205e-16	4.6021e-15
CALM2	31323.3	-1.02844	0.331607	-3.10137	0.00192626	0.00423351
CALM3	29963.9	-2.37693	0.285666	-8.32065	8.74791e-17	1.18214e-15
CALML3-AS1	28.3615	-4.70915	0.640716	-7.34983	1.98459e-13	1.78202e-12
CALML4	193.675	0.604095	0.255084	2.36822	0.0178737	0.0317979
CALN1	3312.96	-2.13445	0.357362	-5.9728	2.33219e-09	1.27686e-08
CALR	10048.6	1.69119	0.206662	8.18334	2.76072e-16	3.51868e-15
CALU	4521.61	1.76888	0.253423	6.97997	2.9524e-12	2.28861e-11
CALY	1558.2	-4.03428	0.437217	-9.22717	2.77874e-20	5.59409e-19
CAMK1	1399.39	-0.660039	0.264342	-2.49691	0.012528	0.0231728
CAMK1D	10055.2	-2.80535	0.249031	-11.2651	1.95194e-29	9.0513e-28
CAMK1G	1710.47	-4.82832	0.41194	-11.7209	9.95708e-32	5.67581e-30
CAMK2A	48888.2	-4.82476	0.490338	-9.83967	7.59623e-23	1.99172e-21
CAMK2B	9300.27	-3.28944	0.383219	-8.58371	9.18596e-18	1.40305e-16
CAMK2G	9219.97	-2.18115	0.228278	-9.55483	1.23783e-21	2.87966e-20
CAMK2N1	8395.22	-2.65292	0.333624	-7.95183	1.83774e-15	2.13283e-14
CAMK2N2	488.807	-2.09083	0.368501	-5.67387	1.39603e-08	6.86538e-08
CAMK4	6372.39	-4.42142	0.406135	-10.8866	1.33583e-27	5.43685e-26
CAMKK1	5024.42	-3.20926	0.33921	-9.46099	3.05043e-21	6.78294e-20
CAMKK2	8687.61	-2.86257	0.277306	-10.3228	5.5588e-25	1.79508e-23
CAMKV	4955.46	-3.54782	0.473266	-7.49647	6.55593e-14	6.24568e-13
CAMLG	1838.06	-0.758537	0.265229	-2.85993	0.00423739	0.00867188
CAMSAP1	5887.92	-0.626701	0.17191	-3.64553	0.000266844	0.000688376
CAMSAP2	12015.8	-1.01549	0.236328	-4.29698	1.73142e-05	5.443e-05
CAMSAP3	833.219	-3.36707	0.357317	-9.42319	4.37586e-21	9.55512e-20
CAMTA1	8123.64	-2.3695	0.188559	-12.5663	3.23353e-36	2.73458e-34
CAMTA2	3870.71	-2.76422	0.173396	-15.9416	3.25781e-57	1.12042e-54
CAND1	10513.8	-0.591877	0.236062	-2.5073	0.0121659	0.0225697
CAND2	1240.95	-1.02129	0.168844	-6.04875	1.45971e-09	8.18509e-09
CANT1	1030.47	0.658734	0.162452	4.05494	5.01471e-05	0.000146487
CANX	24316	0.846779	0.193382	4.37878	1.19345e-05	3.8519e-05
CAP1	7083.03	1.00549	0.23585	4.26325	2.01479e-05	6.25849e-05
CAP2	4678.07	-3.12502	0.368329	-8.48432	2.16984e-17	3.1576e-16
CAPG	1459.73	3.13764	0.389659	8.05227	8.12721e-16	9.83607e-15
CAPN14	79.0678	-1.59395	0.379829	-4.19648	2.7109e-05	8.25186e-05
CAPN2	5666.43	1.07841	0.205976	5.23559	1.64459e-07	7.00147e-07
CAPN3	576.886	1.69776	0.557432	3.04569	0.0023215	0.00502193
CAPN5	1857.76	1.56069	0.310319	5.02932	4.92229e-07	1.94955e-06
CAPNS2	35.0039	2.47809	0.500221	4.95398	7.27102e-07	2.81127e-06
CAPRIN1	10402.8	0.424106	0.182529	2.3235	0.0201521	0.0353875
CAPRIN2	3453.61	-0.781391	0.204595	-3.81921	0.000133881	0.000363553
CAPS	655.724	1.98217	0.322795	6.14065	8.21869e-10	4.73855e-09
CAPS2	1164.55	-0.673056	0.178819	-3.76389	0.000167291	0.000446462
CAPZA1	3138.11	0.649171	0.154478	4.20236	2.64149e-05	8.05128e-05
CAPZB	3304.72	0.700425	0.205737	3.40446	0.000662947	0.00158829
CARD10	130.388	0.698487	0.307779	2.26944	0.0232414	0.0401967
CARD11	263.145	1.50681	0.310242	4.85687	1.19257e-06	4.45892e-06
CARD14	48.4821	1.21445	0.401642	3.02371	0.00249696	0.00536492
CARD16	67.4042	2.50487	0.344189	7.27759	3.3984e-13	2.94399e-12
CARD6	257.632	1.7397	0.268624	6.47631	9.39925e-11	6.06249e-10
CARD8	1357.81	1.70194	0.232379	7.32396	2.4075e-13	2.12757e-12
CARD8-AS1	66.3667	2.13764	0.264157	8.0923	5.85487e-16	7.21285e-15
CARD9	268.258	1.03203	0.382179	2.70039	0.00692592	0.013544
CARHSP1	1182.76	0.980542	0.284523	3.44627	0.000568377	0.00137998
CARM1	1419.8	-0.720565	0.209103	-3.44598	0.000568985	0.00138113
CARM1P1	134.67	-2.4245	0.551433	-4.39673	1.09892e-05	3.56264e-05
CARS	2290.98	0.574865	0.161479	3.56	0.000370854	0.000931083
CARS2	1337.04	0.449895	0.156505	2.87464	0.00404489	0.00830345
CARTPT	800.526	-5.7262	0.701478	-8.16306	3.2665e-16	4.13016e-15
CASC1	271.701	-1.55107	0.304719	-5.09018	3.57721e-07	1.44778e-06
CASC10	344.611	-0.830816	0.314903	-2.63832	0.00833176	0.0160304
CASC5	444.394	4.99429	0.583549	8.55848	1.1437e-17	1.72895e-16
CASD1	3183.97	-1.03071	0.292383	-3.52522	0.000423127	0.00105136
CASK	3863.35	0.871418	0.283163	3.07745	0.00208783	0.00455898
CASKIN1	3521.07	-3.55271	0.382594	-9.28583	1.60449e-20	3.31418e-19
CASP1	292.729	2.44574	0.343235	7.12554	1.03673e-12	8.49938e-12
CASP10	385.652	1.25178	0.374291	3.34442	0.00082455	0.00194164
CASP2	830.387	1.14702	0.32234	3.55842	0.000373095	0.000936025
CASP3	869.728	1.1379	0.191763	5.93391	2.95807e-09	1.59373e-08
CASP4	496.985	2.45405	0.46148	5.31777	1.05046e-07	4.61689e-07
CASP6	157.261	1.49638	0.316411	4.72924	2.25363e-06	8.08759e-06
CASP8	208.412	2.44178	0.302192	8.08025	6.46337e-16	7.93406e-15
CASP8AP2	2583.19	-0.424591	0.097714	-4.34525	1.39118e-05	4.43901e-05
CASQ1	464.692	-2.53755	0.359389	-7.06073	1.6563e-12	1.32369e-11
CASS4	221.93	2.09131	0.500118	4.18162	2.89437e-05	8.77282e-05
CAST	4493.3	0.495364	0.179385	2.76145	0.00575445	0.0114484
CASZ1	100.357	1.0058	0.412457	2.43855	0.0147465	0.0268266
CAT	1942.27	1.42584	0.19393	7.35231	1.94804e-13	1.75002e-12
CATIP	41.5564	1.82744	0.633757	2.8835	0.00393277	0.00809066
CATSPER2	1081.85	-1.88372	0.417761	-4.50907	6.51118e-06	2.18043e-05
CAV1	1351.45	3.20143	0.363942	8.79653	1.41114e-18	2.35019e-17
CAV2	662.288	1.68833	0.265636	6.35579	2.07363e-10	1.28642e-09
CBFA2T2	2625.81	-0.634365	0.146634	-4.32617	1.51722e-05	4.81363e-05
CBFA2T3	201.38	-3.49138	0.406028	-8.59887	8.05081e-18	1.23792e-16
CBFB	1291.71	1.40222	0.198759	7.0549	1.7273e-12	1.3767e-11
CBLB	970.726	0.605044	0.173567	3.48594	0.000490411	0.00120515
CBLN1	134.638	-2.64583	0.547045	-4.83659	1.32086e-06	4.90393e-06
CBLN2	2711.81	-5.92795	0.414935	-14.2865	2.65778e-46	4.85339e-44
CBLN4	1088.46	-4.09346	0.628715	-6.51083	7.47348e-11	4.90195e-10
CBR1	2857.85	1.38105	0.269598	5.12265	3.01274e-07	1.23349e-06
CBR3	197.39	0.769946	0.309273	2.48954	0.012791	0.0236105
CBWD7	296.691	-0.784063	0.325711	-2.40724	0.0160736	0.0289727
CBX2	191.311	3.33984	0.518699	6.43888	1.20357e-10	7.65587e-10
CBX3	3557.86	0.74169	0.274231	2.70462	0.00683835	0.0133934
CBX6	12755.8	-1.80897	0.229905	-7.86836	3.59327e-15	4.01881e-14
CBX7	5307.37	-2.16448	0.294617	-7.34677	2.0306e-13	1.81863e-12
CBX8	268.413	1.33071	0.271346	4.90411	9.38508e-07	3.56782e-06
CBY1	452.855	0.664531	0.124372	5.34309	9.13765e-08	4.04712e-07
CC2D1B	1515.29	0.727945	0.201269	3.61678	0.000298292	0.000763017
CC2D2A	1232.4	0.73994	0.168284	4.39696	1.09775e-05	3.55942e-05
CCBE1	111.3	-2.80623	0.394934	-7.10557	1.19827e-12	9.73476e-12
CCBL1	839.89	-0.580524	0.182305	-3.18435	0.00145079	0.00326395
CCDC101	318.362	0.970515	0.149618	6.4866	8.77942e-11	5.68334e-10
CCDC102A	92.4937	1.85455	0.436033	4.25323	2.10711e-05	6.52267e-05
CCDC106	806.091	-0.553778	0.231723	-2.38982	0.0168565	0.0301938
CCDC107	329.024	0.802531	0.204677	3.92096	8.81957e-05	0.00024744
CCDC108	62.8574	-1.08384	0.486264	-2.22892	0.0258195	0.0441633
CCDC109B	308.793	2.56977	0.285529	9.00002	2.25671e-19	4.09922e-18
CCDC110	99.0803	-2.56929	0.326504	-7.86911	3.57179e-15	3.99695e-14
CCDC113	1472.88	-1.20763	0.255278	-4.73066	2.23795e-06	8.03413e-06
CCDC12	681.918	0.601719	0.156817	3.83709	0.000124502	0.000339964
CCDC125	495.414	0.683029	0.187943	3.63423	0.000278815	0.000717108
CCDC126	502.286	-0.681075	0.209966	-3.24374	0.00117973	0.00270097
CCDC127	1318.35	-0.43523	0.136299	-3.19321	0.001407	0.0031741
CCDC130	1001.4	0.641955	0.127318	5.04214	4.60347e-07	1.83312e-06
CCDC136	2786.61	-0.634926	0.246483	-2.57594	0.00999689	0.0189174
CCDC137	546.285	0.690148	0.171467	4.02497	5.69833e-05	0.000164876
CCDC13-AS1	45.1687	1.92999	0.699324	2.7598	0.0057837	0.0115033
CCDC14	3117.4	0.988723	0.239347	4.13092	3.61314e-05	0.000107851
CCDC141	192.34	2.0014	0.444159	4.50605	6.60453e-06	2.2099e-05
CCDC142	454.253	0.777146	0.213319	3.64311	0.00026936	0.000694608
CCDC144NL	55.797	-2.95558	0.603024	-4.90126	9.52231e-07	3.61538e-06
CCDC144NL-AS1	112.88	-2.43082	0.352728	-6.89147	5.52186e-12	4.14944e-11
CCDC147-AS1	53.9356	-2.71146	0.362313	-7.48374	7.22349e-14	6.85634e-13
CCDC148	328.512	-1.11382	0.229736	-4.84828	1.24535e-06	4.64195e-06
CCDC149	2001.85	-1.31663	0.119566	-11.0117	3.35529e-28	1.42169e-26
CCDC15	222.698	1.84469	0.357344	5.16223	2.4403e-07	1.01217e-06
CCDC150	182.174	2.21046	0.444893	4.96851	6.74679e-07	2.61692e-06
CCDC154	143.104	-1.37928	0.491611	-2.80564	0.0050217	0.0101273
CCDC158	276.704	-2.01474	0.316956	-6.35654	2.06351e-10	1.281e-09
CCDC162P	60.7954	-0.934034	0.3939	-2.37124	0.0177283	0.0315719
CCDC167	280.141	1.66969	0.255556	6.53356	6.42235e-11	4.24488e-10
CCDC17	101.165	1.34009	0.385434	3.47684	0.000507363	0.0012434
CCDC171	1414.84	-1.00771	0.214601	-4.69572	2.65664e-06	9.44031e-06
CCDC174	978.902	0.199918	0.088392	2.26172	0.0237147	0.0409227
CCDC175	124.038	-1.6021	0.462452	-3.46436	0.000531488	0.00129698
CCDC177	344.123	-4.10628	0.464104	-8.84775	8.92991e-19	1.51912e-17
CCDC178	34.6363	-1.19545	0.490379	-2.4378	0.0147768	0.0268752
CCDC18	356.485	0.899507	0.30043	2.99406	0.00275291	0.00587206
CCDC180	459.664	-0.948498	0.32987	-2.87537	0.00403552	0.00828588
CCDC181	441.583	-0.912999	0.266504	-3.42583	0.000612914	0.00147941
CCDC183	108.267	-1.16931	0.220978	-5.29153	1.21299e-07	5.27502e-07
CCDC184	621.75	-2.35411	0.422258	-5.57504	2.47467e-08	1.18069e-07
CCDC186	2392.25	-1.37705	0.179848	-7.65674	1.90715e-14	1.94725e-13
CCDC22	561.281	0.623392	0.157615	3.95514	7.64894e-05	0.000216362
CCDC24	385.828	-0.999204	0.211128	-4.73269	2.21569e-06	7.95696e-06
CCDC25	2307.08	-0.61797	0.256365	-2.41051	0.0159301	0.0287315
CCDC28A	806.753	-0.980688	0.236006	-4.15536	3.24776e-05	9.76505e-05
CCDC3	1678.28	-1.8644	0.283508	-6.5762	4.82633e-11	3.24401e-10
CCDC30	1283.91	-1.38823	0.153338	-9.05341	1.38572e-19	2.56682e-18
CCDC39	221.8	-2.46504	0.43669	-5.64483	1.65347e-08	8.0451e-08
CCDC42B	33.4456	1.8086	0.647951	2.79126	NA	NA
CCDC50	4251.49	1.02233	0.217	4.71121	2.4625e-06	8.78978e-06
CCDC57	2214.54	-1.07911	0.328965	-3.28033	0.00103687	0.00239621
CCDC58	268.58	0.485344	0.147008	3.30147	0.000961807	0.00223803
CCDC6	4100.16	-1.33989	0.200145	-6.69456	2.16322e-11	1.51161e-10
CCDC61	395.957	-0.644167	0.284314	-2.26569	0.0234704	0.0405519
CCDC62	276.618	-1.35442	0.178127	-7.60366	2.87881e-14	2.86423e-13
CCDC64	1181.34	-3.21484	0.263865	-12.1836	3.79909e-34	2.7126e-32
CCDC68	261.821	-3.00948	0.276149	-10.898	1.17769e-27	4.82175e-26
CCDC7	1277.57	-1.48735	0.275242	-5.4038	6.52451e-08	2.93831e-07
CCDC71	468.642	0.906642	0.163643	5.54036	3.01856e-08	1.4208e-07
CCDC71L	514.606	1.15216	0.23858	4.82925	1.37048e-06	5.07172e-06
CCDC77	424.762	0.776613	0.17037	4.5584	5.15452e-06	1.74969e-05
CCDC80	1138.34	2.7108	0.363335	7.46088	8.59462e-14	8.07972e-13
CCDC81	94.1523	1.66597	0.355034	4.69243	2.69984e-06	9.5872e-06
CCDC85A	1094.5	-2.53891	0.365217	-6.95178	3.60714e-12	2.77116e-11
CCDC85B	901.738	-1.18954	0.368733	-3.22603	0.00125521	0.00285571
CCDC85C	1176.12	-0.752801	0.226846	-3.31856	0.000904841	0.00211598
CCDC86	411.469	0.620376	0.181975	3.40913	0.000651712	0.00156409
CCDC87	51.1915	-0.791319	0.266477	-2.96956	0.00298231	0.00629951
CCDC89	82.826	1.00747	0.297286	3.3889	0.000701734	0.00167499
CCDC90B	1702.22	0.558894	0.166006	3.36671	0.000760707	0.00180324
CCDC91	2111.05	-0.900512	0.225337	-3.99629	6.43428e-05	0.000184277
CCDC92	3049.51	-1.2785	0.122219	-10.4607	1.30913e-25	4.50232e-24
CCDC93	2919.02	0.528394	0.149238	3.54062	0.000399181	0.000996023
CCDC94	483.518	0.713084	0.199892	3.56734	0.000360624	0.000908182
CCER2	76.3402	1.31673	0.503153	2.61697	0.00887153	0.0169677
CCK	2832.19	-4.42005	0.528668	-8.36073	6.23316e-17	8.56903e-16
CCKBR	423.559	-4.24993	0.518055	-8.20363	2.33239e-16	2.99868e-15
CCL18	73.2871	10.0892	2.70562	3.72897	NA	NA
CCL2	676.072	4.61794	0.708288	6.51986	7.03718e-11	4.62606e-10
CCL28	62.6992	-1.91364	0.295771	-6.47	9.80012e-11	6.29594e-10
CCL3	1860.68	7.56001	0.837848	9.02313	1.82794e-19	3.35583e-18
CCL3L3	603.673	6.76843	1.3099	5.16711	2.37736e-07	9.87256e-07
CCL4	1452.54	7.96086	1.02812	7.74311	9.70172e-15	1.02297e-13
CCL4L1	852.465	6.31535	0.642923	9.82287	8.97548e-23	2.33555e-21
CCL5	82.8136	2.23142	1.00533	2.21959	0.0264464	0.0451234
CCL8	34.9002	5.48666	0.928529	5.90898	3.44226e-09	1.84018e-08
CCM2	2252.6	-0.454748	0.20104	-2.26197	0.0236992	0.0408992
CCM2L	146.759	-0.659059	0.276905	-2.38009	0.0173084	0.0309417
CCNA1	207.814	-2.12777	0.46381	-4.58759	4.48392e-06	1.53519e-05
CCNA2	280.405	2.21959	0.579779	3.82834	0.000129012	0.000351163
CCNB1	595.335	1.83401	0.473731	3.8714	0.00010821	0.000299145
CCNB2	177.44	4.48373	0.549353	8.16183	3.29999e-16	4.1674e-15
CCNB3	80.2703	1.08603	0.310672	3.49574	0.000472757	0.00116426
CCND1	2056.78	1.96561	0.285021	6.89638	5.33428e-12	4.01726e-11
CCND2P1	50.7887	-4.84466	0.678644	-7.13874	9.41881e-13	7.75877e-12
CCNE2	453.479	2.53533	0.448779	5.6494	1.61008e-08	7.84326e-08
CCNG1	1547.46	0.573419	0.214888	2.66846	0.00762008	0.0147644
CCNG2	2124.45	-0.641304	0.22035	-2.91038	0.00360984	0.00749323
CCNI	13241	-1.39257	0.149274	-9.32898	1.06892e-20	2.24385e-19
CCNJ	302.362	1.14715	0.221915	5.16933	2.34938e-07	9.76619e-07
CCNL1	3084.87	1.21068	0.267321	4.52893	5.92845e-06	1.9963e-05
CCNO	101.588	-3.46709	0.503166	-6.89056	5.55746e-12	4.17467e-11
CCNT2-AS1	179.619	-1.43836	0.231622	-6.20994	5.30064e-10	3.12689e-09
CCNY	3947.94	-0.65839	0.206162	-3.19356	0.0014053	0.0031706
CCNYL1	814.299	-0.469122	0.153297	-3.06021	0.00221181	0.00480834
CCPG1	1422.74	-0.687264	0.25925	-2.65097	0.00802613	0.0154915
CCR1	391.009	2.88416	0.395825	7.28646	3.18214e-13	2.76478e-12
CCR10	77.0685	-0.90266	0.257758	-3.50197	0.000461827	0.00113938
CCR5	114.086	3.33186	0.531004	6.27465	3.50423e-10	2.10939e-09
CCRL2	104.177	3.53655	0.464293	7.61706	2.59511e-14	2.59197e-13
CCS	794.172	0.322848	0.127118	2.53975	0.0110932	0.0207551
CCSAP	5298.89	-1.42018	0.228629	-6.21174	5.24025e-10	3.09364e-09
CCSER1	2010.61	-4.24707	0.162214	-26.1818	4.27799e-151	2.94254e-147
CCSER2	6996.93	-0.866332	0.21864	-3.96236	7.42124e-05	0.000210325
CCT3	5798.98	0.574914	0.208791	2.75353	0.00589562	0.0117078
CCT4P2	67.8017	-1.34617	0.556858	-2.41745	0.0156298	0.0282493
CCT5	4156.42	0.67878	0.26602	2.55161	0.0107226	0.0201457
CCT6A	4892.42	0.735691	0.304724	2.41428	0.0157662	0.0284682
CCZ1B	543.461	0.939191	0.232227	4.04428	5.24848e-05	0.000152775
CD101	141.505	1.69057	0.300084	5.63366	1.76426e-08	8.55392e-08
CD109	783.143	0.818151	0.362345	2.25793	0.0239498	0.0412869
CD14	2658.66	4.21638	0.428704	9.83519	7.94176e-23	2.07441e-21
CD151	1791.17	2.59865	0.263646	9.85662	6.41759e-23	1.69128e-21
CD163	6367.9	5.92831	0.577257	10.2698	9.64203e-25	3.05627e-23
CD163L1	265.684	0.91407	0.383016	2.38651	0.0170093	0.0304411
CD164	3289.53	0.646291	0.255949	2.52508	0.0115674	0.0215562
CD180	199.039	3.36165	0.413605	8.12767	4.37614e-16	5.46951e-15
CD1D	39.9387	2.87266	0.528219	5.43838	5.37658e-08	2.44751e-07
CD200	2223.14	-1.81755	0.350714	-5.18242	2.1903e-07	9.14544e-07
CD226	256.095	1.86525	0.445943	4.1827	2.88074e-05	8.73662e-05
CD24	595.435	3.10373	0.558525	5.55701	2.74428e-08	1.2997e-07
CD244	28.4481	1.21602	0.51223	2.37398	0.0175975	0.0313849
CD248	94.8857	2.33316	0.441223	5.28794	1.23704e-07	5.37283e-07
CD274	261.704	1.20046	0.464569	2.58403	NA	NA
CD276	1221.39	1.79067	0.213358	8.39281	4.74677e-17	6.59594e-16
CD27-AS1	897.69	0.383021	0.116507	3.28755	0.00101065	0.00234059
CD28	33.0172	3.49604	0.643363	5.43401	5.51021e-08	2.50337e-07
CD300A	416.943	2.90699	0.460712	6.30977	2.79456e-10	1.70558e-09
CD300C	76.0678	3.00628	0.429976	6.99174	2.71493e-12	2.11406e-11
CD300E	88.3188	4.33639	1.14008	3.80358	NA	NA
CD300LB	35.8085	4.78157	0.816198	5.85835	4.67502e-09	2.44845e-08
CD300LF	96.9416	4.04177	0.567624	7.12052	1.07522e-12	8.79048e-12
CD302	753.942	1.66639	0.327871	5.08245	3.72588e-07	1.50281e-06
CD320	639.668	1.02334	0.223914	4.57024	4.8717e-06	1.65914e-05
CD33	168.879	2.82666	0.355345	7.95468	1.79601e-15	2.08675e-14
CD36	118.265	1.97061	0.343819	5.73152	9.95342e-09	4.97792e-08
CD37	310.773	3.01928	0.439352	6.87212	6.32528e-12	4.71369e-11
CD38	710.895	1.61234	0.363618	4.43416	9.24301e-06	3.02986e-05
CD4	1030.36	2.85488	0.367378	7.77095	7.79007e-15	8.34621e-14
CD40	184.37	1.4602	0.379797	3.84469	0.000120705	0.000330689
CD44	5604.94	4.32877	0.59491	7.27635	3.42982e-13	2.96872e-12
CD46	4097.28	0.399968	0.169273	2.36285	0.0181349	0.0321987
CD47	10110	-0.915886	0.221342	-4.13788	3.50528e-05	0.000104889
CD48	52.8046	3.53097	0.70001	5.04417	4.55492e-07	1.8145e-06
CD52	41.6933	1.39869	0.630475	2.21846	0.0265232	0.0452356
CD53	1413.65	2.82875	0.348783	8.11034	5.04804e-16	6.27886e-15
CD58	183.927	1.88894	0.259936	7.26694	3.6771e-13	3.16946e-12
CD59	10331	0.630413	0.218518	2.88495	0.0039148	0.00805563
CD63	6356.13	2.04007	0.21524	9.4781	2.58946e-21	5.83336e-20
CD68	33.7047	4.43226	0.616274	7.19202	6.38407e-13	5.35509e-12
CD69	129.931	4.28035	0.571451	7.49032	6.87075e-14	6.53356e-13
CD72	91.7124	2.74285	0.513319	5.34337	NA	NA
CD74	17906.2	3.62598	0.531341	6.8242	8.84184e-12	6.4791e-11
CD80	28.1079	4.26599	0.669249	6.37429	1.83809e-10	1.14797e-09
CD81	8951.92	1.14361	0.166044	6.88736	5.68359e-12	4.26011e-11
CD82	1131.76	2.19935	0.297247	7.39905	1.37164e-13	1.25851e-12
CD83	1573.77	1.34621	0.440434	3.05654	0.00223905	0.00486448
CD84	1687.2	4.17206	0.422592	9.87256	5.47511e-23	1.45217e-21
CD86	598.975	4.01952	0.444955	9.03354	1.66205e-19	3.06492e-18
CD9	2354.42	2.13646	0.337997	6.32095	2.59963e-10	1.59227e-09
CD93	1738.6	3.23958	0.499428	6.48658	8.78047e-11	5.68334e-10
CD96	40.5177	1.75799	0.794903	2.21158	0.0269956	0.0459654
CD97	424.487	1.56512	0.378765	4.13217	3.59358e-05	0.000107298
CD99	2662.68	2.63924	0.291233	9.06229	1.27736e-19	2.37463e-18
CD99L2	8608.73	-0.993857	0.234279	-4.2422	2.21343e-05	6.82009e-05
CD99P1	131.663	1.64381	0.418479	3.92807	8.56302e-05	0.0002407
CDADC1	556.622	-0.651841	0.190114	-3.42869	0.000606505	0.001466
CDC20	235.749	5.11739	0.601095	8.51345	1.68828e-17	2.49733e-16
CDC23	1112.59	0.53686	0.166752	3.21951	0.00128409	0.00291754
CDC25A	182.571	2.62736	0.52336	5.02018	5.1622e-07	2.03519e-06
CDC25C	58.789	4.2666	0.668374	6.38354	1.73037e-10	1.08529e-09
CDC26	219.089	0.695687	0.152106	4.57369	4.79202e-06	1.63444e-05
CDC27	4768.14	-0.589716	0.230005	-2.56392	0.0103496	0.0195155
CDC37L1	1369.3	-0.961057	0.26785	-3.58804	0.000333174	0.00084429
CDC37L1-AS1	32.1186	0.934383	0.315434	2.96221	0.00305436	0.00643721
CDC40	1972.47	-0.831898	0.231493	-3.59362	0.000326113	0.000828227
CDC42	5896.73	0.643077	0.278676	2.30761	0.0210207	0.0367501
CDC42BPA	11941.3	-0.922079	0.144832	-6.36652	1.93366e-10	1.20474e-09
CDC42BPB	9160.51	-0.828993	0.126035	-6.57746	4.7854e-11	3.21965e-10
CDC42EP1	1082.37	2.03123	0.439166	4.62521	3.74228e-06	1.29916e-05
CDC42EP3	990.472	-0.700235	0.296035	-2.36538	0.0180114	0.032007
CDC42SE1	4030.64	1.54635	0.143667	10.7634	5.12541e-27	1.98058e-25
CDC42SE2	4511.81	-1.22849	0.295187	-4.16173	3.15846e-05	9.51318e-05
CDC45	103.077	4.70233	0.692349	6.79184	1.10711e-11	8.01022e-11
CDCA2	163.715	5.21132	0.659518	7.90171	2.75096e-15	3.12589e-14
CDCA3	129.311	2.46045	0.424364	5.79797	6.71235e-09	3.43269e-08
CDCA4	162.364	1.80939	0.244794	7.39148	1.45207e-13	1.32817e-12
CDCA5	281.302	1.39915	0.53969	2.59252	0.00952769	0.0181085
CDCA7	202.953	3.29852	0.53707	6.1417	8.16436e-10	4.70985e-09
CDCA7L	849.109	2.63683	0.318297	8.28418	1.18923e-16	1.57609e-15
CDCA8	155.369	3.34001	0.559951	5.96483	2.44895e-09	1.33723e-08
CDCP1	312.37	3.0477	0.387567	7.86367	3.73026e-15	4.16525e-14
CDH1	241.163	1.58216	0.577374	2.74027	0.00613879	0.0121487
CDH10	2138.81	-2.09903	0.415259	-5.05476	4.30942e-07	1.72268e-06
CDH11	3679.75	1.44094	0.175974	8.18833	2.64878e-16	3.38856e-15
CDH12	888.965	-3.87763	0.4587	-8.45352	2.82661e-17	4.05613e-16
CDH15	28.0594	4.13953	1.00464	4.1204	3.78207e-05	0.000112584
CDH18	2603.47	-4.38274	0.265262	-16.5223	2.5339e-61	1.24493e-58
CDH19	1092.85	2.28352	0.635559	3.59293	0.000326984	0.000829927
CDH2	5900.54	0.425558	0.17377	2.44897	0.0143267	0.0261366
CDH22	1144.07	-3.48127	0.413289	-8.42332	3.65953e-17	5.16162e-16
CDH4	1327.53	-1.09765	0.194008	-5.65774	1.53379e-08	7.49283e-08
CDH7	667.549	-2.78933	0.514721	-5.4191	5.98995e-08	2.70999e-07
CDH8	2401.03	-2.7514	0.384845	-7.14937	8.71798e-13	7.20736e-12
CDH9	910.726	-4.97957	0.489173	-10.1796	2.44656e-24	7.5238e-23
CDHR1	891.105	-1.53724	0.311316	-4.93788	7.8978e-07	3.03541e-06
CDHR2	81.5347	-3.23363	0.269276	-12.0086	3.20142e-33	2.02642e-31
CDIP1	4322.63	-1.39567	0.173133	-8.06125	7.55168e-16	9.19887e-15
CDK1	256.685	4.09455	0.568242	7.20563	5.77751e-13	4.88202e-12
CDK14	6903.4	-1.64716	0.3335	-4.93901	7.85214e-07	3.02067e-06
CDK17	4716.67	-0.560726	0.24593	-2.28002	0.0226065	0.0392235
CDK2	378.253	2.543	0.405898	6.26513	3.72523e-10	2.23785e-09
CDK20	975.66	-0.929425	0.231155	-4.0208	5.80018e-05	0.000167605
CDK2AP1	2073.89	1.08481	0.224752	4.82668	1.3883e-06	5.13307e-06
CDK2AP2	585.995	0.942922	0.216268	4.35998	1.30077e-05	4.17311e-05
CDK4	6472.76	4.79263	0.764251	6.27101	NA	NA
CDK5R1	6650.77	-3.47689	0.318109	-10.9298	8.29874e-28	3.44557e-26
CDK5R2	587.694	-4.80997	0.366552	-13.1222	2.45629e-39	2.66766e-37
CDK5RAP1	1370.66	-0.358276	0.103325	-3.46747	0.000525381	0.0012839
CDK5RAP3	3389.2	0.689118	0.178857	3.8529	0.000116727	0.000320855
CDK6	3398.56	1.78635	0.27015	6.61244	3.78024e-11	2.57613e-10
CDK9	2125.35	-0.453053	0.170375	-2.65916	0.00783357	0.015151
CDKAL1	1132.26	0.676145	0.100913	6.7003	2.07985e-11	1.45681e-10
CDKL1	971.897	-1.17346	0.274404	-4.27639	1.89948e-05	5.92889e-05
CDKL2	1078.73	-2.18769	0.342499	-6.38744	1.68686e-10	1.05994e-09
CDKL4	66.0634	-0.965192	0.267037	-3.61445	0.000300982	0.000769136
CDKL5	11125.6	-2.63057	0.226534	-11.6123	3.57012e-31	1.93358e-29
CDKN1A	2273.35	3.23948	0.492528	6.57724	4.79265e-11	3.22348e-10
CDKN1C	509.387	1.74589	0.492546	3.54463	0.000393171	0.000982213
CDKN2A	236.331	4.11986	0.698707	5.89641	3.71497e-09	1.97624e-08
CDKN2AIP	726.079	0.409125	0.120943	3.3828	0.000717505	0.00171085
CDKN2AIPNL	713.524	-0.76157	0.310674	-2.45135	0.0142323	0.025992
CDKN2B	188.544	1.66142	0.3718	4.4686	7.87346e-06	2.60492e-05
CDKN2B-AS1	100.787	1.65174	0.531081	3.11014	0.00187	0.0041173
CDKN2C	492.374	2.13377	0.403787	5.2844	NA	NA
CDKN2D	1070.22	-2.46426	0.279164	-8.82727	1.07262e-18	1.81126e-17
CDKN3	126.946	1.52766	0.478679	3.19141	0.00141579	0.00319149
CDPF1	188.303	0.744925	0.16519	4.5095	6.49818e-06	2.17643e-05
CDR1-AS	21709.8	-3.48011	0.581289	-5.98687	2.13912e-09	1.17583e-08
CDR2	779.71	-0.801373	0.225787	-3.54924	0.000386348	0.000966456
CDR2L	731.314	0.808449	0.326001	2.4799	0.0131421	0.024185
CDS1	1443.09	-3.36199	0.297749	-11.2913	1.44815e-29	6.79149e-28
CDS2	13590.3	-1.15471	0.187111	-6.17124	6.77546e-10	3.93975e-09
CDT1	113.55	1.82933	0.490557	3.72909	0.000192175	0.000507081
CDV3	5082.72	0.620737	0.192369	3.2268	0.00125184	0.00284961
CDYL	2189.62	-0.320949	0.142238	-2.25642	0.0240446	0.0414261
CDYL2	2961.96	-2.62199	0.185158	-14.1608	1.60097e-45	2.77613e-43
CEACAM21	51.1557	2.70934	0.463034	5.85127	4.87827e-09	2.54972e-08
CEACAMP5	36.957	-1.41784	0.511284	-2.77309	0.0055527	0.01108
CEBPA	928.784	2.40035	0.321204	7.47299	7.83949e-14	7.40357e-13
CEBPB	593.853	1.04798	0.396451	2.6434	0.00820787	0.0158112
CEBPB-AS1	162.104	-1.83764	0.316409	-5.80781	6.32949e-09	3.25384e-08
CEBPD	985.436	2.0397	0.457566	4.45772	8.28356e-06	2.73184e-05
CEBPZ	1968.24	0.353	0.156848	2.25059	0.0244117	0.0420165
CEBPZOS	1480.12	-0.849263	0.178943	-4.74599	2.07486e-06	7.47726e-06
CECR1	625.703	1.93091	0.370896	5.20606	1.9289e-07	8.128e-07
CECR2	1156.69	0.883612	0.283755	3.114	0.0018457	0.00406902
CECR5	828.18	0.927539	0.218521	4.24462	2.18967e-05	6.75494e-05
CECR6	651.769	-2.03013	0.222877	-9.10874	8.33432e-20	1.59092e-18
CEL	69.6862	-1.35769	0.534888	-2.53828	0.01114	0.0208294
CELF1	7624.13	-0.453259	0.112593	-4.02563	5.6824e-05	0.000164455
CELF2	11108.2	-1.40957	0.148269	-9.50687	1.96485e-21	4.49496e-20
CELF3	1733.27	-2.56196	0.444674	-5.76144	8.33974e-09	4.21894e-08
CELF4	4238.86	-3.95796	0.423168	-9.35318	8.50494e-21	1.80741e-19
CELF5	2781.7	-3.11782	0.424644	-7.34218	2.10138e-13	1.87795e-12
CELSR1	179.022	4.93625	0.472388	10.4496	1.472e-25	5.03728e-24
CELSR2	15242.1	-2.16984	0.179722	-12.0734	1.46042e-33	9.75267e-32
CELSR3	3998.16	-1.96554	0.332558	-5.91036	3.41365e-09	1.82678e-08
CEND1	3459.21	-2.72942	0.262088	-10.4141	2.13744e-25	7.13689e-24
CENPA	50.8145	5.92119	0.72909	8.12135	4.61025e-16	5.74819e-15
CENPB	3078.01	1.1666	0.227145	5.13593	2.80759e-07	1.15546e-06
CENPBD1P1	1514.76	-0.707031	0.196925	-3.59036	0.00033022	0.000837317
CENPC	2892.17	-0.502616	0.194885	-2.57904	0.00990741	0.0187726
CENPE	575.855	2.7101	0.535471	5.06114	4.1675e-07	1.66983e-06
CENPF	2374.92	4.62534	0.609456	7.5893	3.21643e-14	3.17413e-13
CENPH	130.312	1.82033	0.484805	3.75476	0.000173508	0.000461622
CENPI	238.514	2.26792	0.452428	5.01277	5.36523e-07	2.10919e-06
CENPK	94.9516	2.9718	0.556804	5.33725	9.43647e-08	4.17141e-07
CENPL	270.557	1.39535	0.255987	5.45086	5.01274e-08	2.29251e-07
CENPM	79.6606	3.64083	0.568494	6.40434	1.51018e-10	9.53277e-10
CENPN	291.141	1.24022	0.359151	3.4532	0.00055397	0.00134865
CENPO	691.537	1.2841	0.320965	4.00074	6.31434e-05	0.000181118
CENPP	365.21	1.00771	0.252414	3.99232	6.54313e-05	0.000187186
CENPQ	190.9	0.879698	0.289726	3.03631	0.00239495	0.00516242
CENPU	231.335	4.52307	0.583427	7.75258	9.00411e-15	9.54287e-14
CENPW	72.0387	1.13792	0.460255	2.47236	0.0134223	0.0246414
CEP112	1111.66	-0.695213	0.163424	-4.25404	2.09949e-05	6.50105e-05
CEP135	592.155	0.68009	0.220018	3.09106	0.00199444	0.00437263
CEP170B	6071.26	-2.85119	0.303432	-9.3965	5.64085e-21	1.21756e-19
CEP170P1	88.8197	-0.766139	0.300438	-2.55008	0.0107699	0.0202162
CEP19	378.048	-0.850264	0.254626	-3.33927	0.000839985	0.00197596
CEP250	3471.32	-0.359075	0.156281	-2.29762	0.0215834	0.0376256
CEP290	3192.99	-0.826287	0.178208	-4.63664	3.54121e-06	1.23122e-05
CEP55	124.446	5.34982	0.757892	7.05881	1.67933e-12	1.34106e-11
CEP68	3247.26	-0.736112	0.171792	-4.28491	1.82813e-05	5.72001e-05
CEP70	1591.65	-0.412382	0.132955	-3.10166	0.00192438	0.00422983
CEPT1	1469.37	0.50961	0.174913	2.91351	0.00357394	0.00742756
CERCAM	6620.18	1.34456	0.529728	2.5382	0.0111424	0.0208294
CERK	3569.1	-0.63353	0.181035	-3.49948	0.000466166	0.00114954
CERS2	3551.2	1.95943	0.311034	6.29971	2.98194e-10	1.81022e-09
CERS6	5974.17	-1.44137	0.293321	-4.91396	8.92565e-07	3.40571e-06
CES1	43.9229	2.06569	0.70464	2.93156	0.00337268	0.00704833
CES3	151.888	-1.14871	0.23341	-4.92143	8.59149e-07	3.28765e-06
CES4A	2015.08	-1.71625	0.430198	-3.98945	6.62262e-05	0.000189329
CES5AP1	31.1963	-3.34066	0.602526	-5.54443	2.9492e-08	1.39069e-07
CETP	24.4994	3.1551	0.541987	5.82137	5.83681e-09	3.01634e-08
CFAP126	51.5866	2.53859	0.704041	3.60574	NA	NA
CFAP221	765.951	-2.11865	0.338454	-6.25978	3.85522e-10	2.31325e-09
CFAP36	1965.95	-1.07208	0.239556	-4.47527	7.63156e-06	2.52975e-05
CFAP45	29.0185	3.17851	0.64102	4.95853	7.10302e-07	2.74889e-06
CFAP46	764.916	-2.08412	0.482683	-4.31778	1.57605e-05	4.98343e-05
CFAP52	159.907	-0.520744	0.549372	-0.947888	NA	NA
CFAP54	766.974	0.719168	0.519202	1.38514	NA	NA
CFAP57	76.7485	-1.57168	0.427431	-3.67703	0.000235967	0.000613942
CFAP58	62.7981	-0.80764	0.348691	-2.3162	0.0205471	0.0360106
CFAP61	203.963	0.652304	0.295221	2.20954	0.0271368	0.046179
CFAP69	500.141	-1.25203	0.310714	-4.02953	5.5888e-05	0.000161996
CFAP74	423.841	-2.6532	0.292185	-9.08053	1.08046e-19	2.02685e-18
CFB	76.8669	1.04877	0.44236	2.37085	0.0177472	0.0315946
CFD	100.606	4.4867	0.494686	9.0698	1.19232e-19	2.22657e-18
CFI	1136.94	4.13636	0.410635	10.0731	7.26754e-24	2.12115e-22
CFL1P1	60.3627	-0.698047	0.246846	-2.82786	0.00468603	0.00950332
CFLAR	4541.24	1.11955	0.317915	3.52153	0.000429061	0.00106478
CGREF1	1205.67	-1.46034	0.43904	-3.32621	0.000880352	0.00206222
CH17-118O6.2	98.4908	0.486828	0.223166	2.18146	0.0291493	0.0491941
CH17-118O6.3	25.1022	3.90653	0.857299	4.55679	5.19414e-06	1.76256e-05
CH17-140K24.3	52.0099	1.52013	0.559506	2.71692	NA	NA
CH17-189H20.1	134.535	0.8126	0.357032	2.27599	0.0228466	0.0396101
CH17-262O2.1	42.1983	-3.38182	0.659616	-5.12696	2.94459e-07	1.20726e-06
CH17-351M24.1	282.948	-5.46897	0.588312	-9.29604	1.45779e-20	3.02935e-19
CH17-373J23.1	90.3915	3.32199	0.342799	9.69078	3.29987e-22	8.18423e-21
CH17-385C13.2	31.1943	-0.778849	0.2955	-2.6357	0.00839649	0.0161459
CH17-76K2.6	35.4988	-2.16358	0.626745	-3.4521	0.000556244	0.00135355
CH25H	374.845	3.58165	0.590909	6.06126	1.35061e-09	7.5981e-09
CH507-42P11.8	88.2124	1.19482	0.446206	2.67773	0.0074124	0.0144107
CH507-9B2.9	102.665	-1.41051	0.30202	-4.67026	3.00823e-06	1.05785e-05
CHAC1	169.083	-1.09172	0.264099	-4.13375	3.56891e-05	0.000106639
CHAD	59.7269	-1.62685	0.443961	-3.66439	0.000247926	0.000642778
CHADL	938.082	2.63915	0.345376	7.64138	2.14901e-14	2.1759e-13
CHCHD10	918.43	-1.30769	0.250646	-5.21726	1.81592e-07	7.6833e-07
CHCHD3	1639.31	0.736873	0.229073	3.21676	0.00129648	0.00294312
CHCHD5	208.775	1.04237	0.220804	4.7208	2.34918e-06	8.41147e-06
CHCHD6	714.07	-0.878061	0.225867	-3.88751	0.000101278	0.000281388
CHD1	2909.32	0.980572	0.146068	6.71312	1.90501e-11	1.34209e-10
CHD1L	2099.51	0.804604	0.115854	6.94498	3.78518e-12	2.90254e-11
CHD3	8852.24	-1.35899	0.242937	-5.59399	2.21909e-08	1.0654e-07
CHD4	10582.5	0.758989	0.122376	6.20208	5.57201e-10	3.27294e-09
CHD5	12917.3	-4.66111	0.440257	-10.5872	3.41482e-26	1.2384e-24
CHD6	9238.09	-0.301716	0.0855399	-3.5272	0.000419981	0.00104426
CHD7	5193.91	2.24304	0.230703	9.72264	2.41439e-22	6.06094e-21
CHD9	11388.5	-0.176182	0.0805333	-2.1877	0.0286917	0.0485131
CHEK1	277.263	2.2006	0.433843	5.07234	3.92944e-07	1.58058e-06
CHEK2	173.087	2.24467	0.24136	9.30012	1.40288e-20	2.91818e-19
CHERP	1030.19	-0.959499	0.199876	-4.80046	1.58302e-06	5.80619e-06
CHGA	6019.73	-3.61631	0.518698	-6.9719	3.12686e-12	2.41839e-11
CHGB	3701.6	-2.56748	0.4746	-5.40977	6.31067e-08	2.84511e-07
CHI3L1	20596.3	3.76049	1.02168	3.68069	0.000232606	0.000605963
CHI3L2	2314.82	5.02577	1.19768	4.19627	2.71347e-05	8.25727e-05
CHIC1	2796.13	-1.94176	0.322273	-6.02522	1.68883e-09	9.38818e-09
CHIC2	815.094	2.51275	0.579252	4.33791	NA	NA
CHID1	1653.12	0.725534	0.180945	4.00969	6.07979e-05	0.000174999
CHIT1	72.3026	2.24514	0.381384	5.88682	3.93693e-09	2.08786e-08
CHKB-AS1	46.5602	-0.5073	0.219724	-2.30881	0.0209542	0.0366525
CHM	2713.73	-0.975431	0.207904	-4.69173	2.70909e-06	9.61179e-06
CHML	2320.63	-1.8551	0.315949	-5.87151	4.31844e-09	2.2744e-08
CHMP1A	2054.7	0.286655	0.125202	2.28955	0.0220476	0.0383409
CHMP2A	1754.65	0.707957	0.203746	3.4747	0.000511416	0.00125229
CHMP3	3758.13	-0.981218	0.261886	-3.74674	0.000179149	0.000474984
CHMP4A	267.528	-0.580666	0.147013	-3.94976	7.82283e-05	0.000220947
CHMP4B	2578.74	-0.642066	0.189952	-3.38015	0.000724458	0.00172539
CHMP6	534.845	0.712672	0.171602	4.15304	3.28083e-05	9.85873e-05
CHN1	30359.3	-4.1359	0.355214	-11.6434	2.47963e-31	1.36811e-29
CHPF	1904.09	1.05739	0.347835	3.03993	0.00236635	0.0051077
CHPF2	2353.39	0.594564	0.174564	3.40599	0.000659245	0.00158144
CHPT1	2401.01	-0.638203	0.185469	-3.44102	0.000579518	0.00140521
CHRAC1	263.801	1.14416	0.210196	5.44331	5.22998e-08	2.3855e-07
CHRD	1673.89	-2.54852	0.233671	-10.9064	1.07373e-27	4.40484e-26
CHRFAM7A	42.9162	-1.47414	0.535494	-2.75285	0.00590782	0.0117275
CHRM1	1979.02	-4.37317	0.474754	-9.21146	3.21732e-20	6.45183e-19
CHRM2	296.963	-2.82092	0.40871	-6.902	5.12744e-12	3.86289e-11
CHRM3	4453.67	-3.07692	0.521629	-5.89868	3.66431e-09	1.9508e-08
CHRM4	200.762	-3.57266	0.527067	-6.77838	1.21527e-11	8.74071e-11
CHRM5	53.0446	-1.58426	0.641019	-2.47146	0.0134562	0.0246992
CHRNA1	123.836	3.45562	0.774393	4.46236	NA	NA
CHRNA10	50.0969	1.21181	0.423436	2.86185	0.00421179	0.00862376
CHRNA2	149.776	-4.62941	0.520014	-8.90247	5.46175e-19	9.4868e-18
CHRNA3	26.8393	2.70827	0.786589	3.44306	0.000575177	0.00139534
CHRNA4	807.346	-3.46637	0.363368	-9.53958	1.43418e-21	3.3252e-20
CHRNA7	71.0543	-2.37591	0.496343	-4.78682	1.69442e-06	6.18728e-06
CHRNA9	95.1887	5.63197	0.749952	7.50978	5.9226e-14	5.67639e-13
CHRNB1	297.8	0.491153	0.165931	2.95997	0.00307666	0.00647958
CHRNB2	2167.85	-2.76783	0.426928	-6.48313	8.98374e-11	5.81127e-10
CHRNB3	27.3079	-5.84084	0.799817	-7.30272	2.81998e-13	2.46883e-12
CHRNE	48.0538	1.29268	0.505946	2.55498	0.0106194	0.0199647
CHST1	2207.43	-2.81668	0.248025	-11.3564	6.89303e-30	3.35466e-28
CHST11	2456.07	1.73841	0.242125	7.1798	6.9813e-13	5.82528e-12
CHST14	223.84	2.23231	0.284313	7.85159	4.10802e-15	4.56484e-14
CHST3	2126.35	1.74342	0.351199	4.96419	6.89884e-07	2.67439e-06
CHST6	1350.92	1.37082	0.399509	3.43126	0.000600789	0.0014536
CHST9	270.689	1.76139	0.32107	5.486	4.11126e-08	1.90087e-07
CHSY1	1941.39	0.635724	0.178068	3.57013	0.000356811	0.000899327
CHSY3	579.804	-2.17558	0.242311	-8.97846	2.74589e-19	4.93566e-18
CHTF8	1734.07	0.354421	0.145233	2.44036	0.0146725	0.0267107
CHTOP	2428.17	0.831698	0.0954925	8.70957	3.0503e-18	4.89068e-17
CHUK	1293.1	0.424314	0.150595	2.81758	0.00483872	0.00978891
CIART	284.037	-0.727176	0.33157	-2.19313	0.0282978	0.0479374
CIB1	721.53	1.20974	0.239589	5.04923	4.436e-07	1.76951e-06
CIC	4149.9	-1.27635	0.195962	-6.51322	7.35549e-11	4.82762e-10
CIDEA	67.7729	-3.78249	0.525133	-7.20293	5.89338e-13	4.96975e-12
CIDEB	76.1098	1.87352	0.327054	5.72848	1.01335e-08	5.06062e-08
CIITA	1238.68	2.49449	0.597938	4.17183	3.02163e-05	9.13302e-05
CILP	29.9656	1.17542	0.345216	3.40488	0.00066192	0.0015862
CILP2	24.6045	-1.76178	0.434262	-4.05695	4.97168e-05	0.000145333
CIPC	4257.13	-0.42117	0.173947	-2.42125	0.0154674	0.0279924
CIR1	1041.53	-0.398187	0.167249	-2.38079	0.0172753	0.0308905
CISD1	1429.41	-1.61874	0.304621	-5.31395	1.07275e-07	4.70709e-07
CISH	72.1374	1.8142	0.568228	3.19272	0.00140937	0.0031791
CIT	12170.4	-2.44765	0.269297	-9.08904	9.99157e-20	1.88484e-18
CITED1	198.771	1.41632	0.498366	2.84194	0.00448406	0.00913328
CITF22-1A6.3	24.1517	1.62841	0.492869	3.30393	0.000953393	0.0022201
CIZ1	2733.65	-0.432795	0.152092	-2.84562	0.00443257	0.00904261
CKAP2	1079.15	0.810474	0.372421	2.17623	0.0295379	0.0497563
CKAP2L	210.514	4.55155	0.606696	7.50219	6.27611e-14	6.00406e-13
CKAP4	1449.41	0.798888	0.225893	3.53657	0.000405357	0.0010107
CKB	15492.1	-1.31136	0.232691	-5.63562	1.74431e-08	8.46915e-08
CKLF	204.334	2.01306	0.161552	12.4607	1.22236e-35	9.93043e-34
CKLF-CMTM1	33.3251	0.973371	0.351451	2.76958	0.00561286	0.0111926
CKMT1A	356.219	-3.52417	0.458041	-7.694	1.42605e-14	1.47723e-13
[truncated: 10,393 more rows]

## Sheet: AC DEGs
Gene	baseMean	log2FoldChange	lfcSE	stat	pvalue	padj
A1BG	110.238	-1.43225	0.42851	-3.34238	0.000830619	0.000920953
A1CF	87.4366	-7.32241	0.843313	-8.68291	3.85781e-18	5.63711e-18
A2M	16438.1	6.00796	0.252788	23.7668	7.37104e-125	1.40451e-123
A2M-AS1	2413.96	-5.28607	0.167478	-31.5628	1.19608e-218	1.31022e-216
A2ML1-AS1	138.77	-6.83541	0.511587	-13.3612	1.01935e-40	2.44142e-40
A2ML1-AS2	1598.19	-13.6337	0.957161	-14.2439	4.88896e-46	1.33985e-45
A2MP1	10004.8	-11.0116	0.263913	-41.7246	0	0
A3GALT2	116.236	-2.41456	0.386473	-6.24767	4.16614e-10	5.1583e-10
A4GALT	1778.46	-4.39676	0.245207	-17.9308	6.77719e-72	3.56385e-71
A4GNT	358.317	-8.55969	0.561525	-15.2437	1.81407e-52	5.80743e-52
AA06	7326.82	-8.163	0.82054	-9.94832	2.56485e-23	4.15974e-23
AAAS	1359.72	0.362669	0.147391	2.46058	0.0138713	0.0149308
AACS	603.586	2.30058	0.194347	11.8375	2.49778e-32	4.92216e-32
AACSP1	742.649	-7.473	0.305489	-24.4624	3.71077e-132	8.15664e-131
AADAC	2840.86	-11.3878	0.637896	-17.8521	2.78313e-71	1.43853e-70
AADACL2	785.44	-12.0311	0.93854	-12.819	1.28383e-37	2.85262e-37
AADACL2-AS1	589.487	-8.09976	0.40008	-20.2453	3.90465e-91	3.5293e-90
AADACL3	3378.49	-13.5593	0.943804	-14.3667	8.37749e-47	2.33655e-46
AADACL4	9278.48	-15.0169	0.940661	-15.9642	2.26922e-57	8.19377e-57
AADACP1	1318.37	-7.93285	0.434269	-18.2671	1.51224e-74	8.53929e-74
AADAT	912.633	-1.62421	0.327108	-4.96535	6.8576e-07	8.06319e-07
AAED1	302.087	2.13484	0.243631	8.76261	1.90774e-18	2.80317e-18
AAGAB	595.827	5.87035	0.223471	26.269	4.33852e-152	1.36995e-150
AAK1	2162.55	9.25648	0.514673	17.9852	2.54602e-72	1.35653e-71
AAMP	11442.2	-2.16559	0.240512	-9.0041	2.17438e-19	3.25899e-19
AANAT	5011.48	-9.61062	0.278237	-34.5411	1.93929e-261	4.12976e-259
AAR2	472.158	4.16518	0.34288	12.1476	5.90543e-34	1.20716e-33
AARD	3336.44	-11	0.467018	-23.5537	1.15052e-122	2.10052e-121
AARS	3710.47	2.86725	0.300178	9.55182	1.27432e-21	1.99736e-21
AARS2	1007.28	0.751013	0.26244	2.86166	0.00421431	0.0046004
AARSD1	1025.57	-2.43323	0.412184	-5.90326	3.5639e-09	4.34892e-09
AARSP1	697.649	-12.4374	0.97002	-12.8218	1.23848e-37	2.75322e-37
AASDHPPT	1295.17	1.39632	0.129754	10.7613	5.24481e-27	9.1886e-27
AASS	1503.03	6.72252	0.212266	31.6703	3.98604e-220	4.53438e-218
AATBC	286.92	-3.98383	0.395327	-10.0773	6.96122e-24	1.14355e-23
AATF	1102.03	1.07567	0.169961	6.32896	2.46817e-10	3.06495e-10
AATK-AS1	1028.48	-9.72779	0.511017	-19.0361	8.56277e-81	5.76315e-80
AB015752.3	716.905	-5.07878	0.237272	-21.4049	1.2029e-101	1.405e-100
AB019438.66	642.13	-12.3177	0.946203	-13.0181	9.66032e-39	2.20501e-38
AB019440.50	37.1872	-6.49818	0.896424	-7.24901	4.19831e-13	5.49191e-13
AB019441.29	26.6633	-2.6539	0.495822	-5.35253	8.67319e-08	1.03581e-07
ABALON	61.6243	-2.87671	0.586222	-4.90719	9.23888e-07	1.0832e-06
ABAT	3656.05	4.0151	0.24809	16.184	6.53543e-59	2.45577e-58
ABBA01017803.1	3934.3	-9.74898	0.34228	-28.4825	1.93156e-178	9.75638e-177
ABC12-47043100G14.2	27.0145	-7.74762	1.00942	-7.67532	1.65002e-14	2.22254e-14
ABC12-47964100C23.1	1464.39	-13.5074	0.93051	-14.5161	9.58315e-48	2.72857e-47
ABC12-49244600F4.4	1103.54	-10.3627	0.739437	-14.0142	1.27561e-44	3.37361e-44
ABC14-1080714F14.1	86.1953	-9.42153	0.954142	-9.87435	5.37831e-23	8.66933e-23
ABC7-42391500H16.2	1127.59	-13.1307	0.949476	-13.8294	1.69388e-43	4.34512e-43
ABC7-42418200C9.1	1520	-13.5616	0.921842	-14.7114	5.44756e-49	1.59965e-48
ABC7-43041300I9.1	896.693	-10.7207	0.812946	-13.1875	1.0353e-39	2.42189e-39
ABC7-481722F1.1	1478.04	-11.8222	0.872537	-13.5493	8.00316e-42	1.97274e-41
ABCA1	7965.53	3.59787	0.216113	16.6481	3.12222e-62	1.2708e-61
ABCA10	1675.49	-3.05494	0.401258	-7.6134	2.66983e-14	3.57954e-14
ABCA11P	1449.4	-4.61148	0.230598	-19.998	5.73699e-89	4.89151e-88
ABCA12	1024.51	-3.04745	0.538581	-5.6583	1.5288e-08	1.84684e-08
ABCA13	1465.81	-1.54916	0.692001	-2.23867	0.0251774	0.0269048
ABCA17P	499.77	-2.71191	0.235826	-11.4996	1.32559e-30	2.51307e-30
ABCA2	2438.85	7.21619	0.305869	23.5924	4.6131e-123	8.50979e-122
ABCA3	2510.48	1.31321	0.272915	4.8118	1.49576e-06	1.74615e-06
ABCA4	220.434	-2.16331	0.286367	-7.55433	4.21029e-14	5.61829e-14
ABCA6	502.397	1.83744	0.583863	3.14705	0.00164928	0.00181699
ABCA8	1390.02	2.13526	0.462686	4.61491	3.9326e-06	4.55792e-06
ABCA9	356.307	0.877343	0.340424	2.5772	0.0099603	0.0107629
ABCA9-AS1	107.215	-6.79137	0.621577	-10.926	8.65638e-28	1.54285e-27
ABCB1	763.857	3.22727	0.282965	11.4052	3.93899e-30	7.38497e-30
ABCB10	1389	-0.913428	0.198597	-4.5994	4.23719e-06	4.90817e-06
ABCB10P1	816.584	-9.22311	0.526323	-17.5237	9.45042e-69	4.54655e-68
ABCB10P3	383.7	-11.5758	0.937263	-12.3506	4.83195e-35	1.01205e-34
ABCB10P4	6655.94	-13.9994	0.842438	-16.6177	5.18663e-62	2.0979e-61
ABCB11	199.392	-4.62216	0.457459	-10.104	5.30384e-24	8.73117e-24
ABCB5	285.641	-5.83721	0.420439	-13.8836	7.96598e-44	2.06251e-43
ABCB6	971.276	-1.30681	0.245665	-5.31951	1.04049e-07	1.24073e-07
ABCB8	2843.56	-0.598185	0.172051	-3.4768	0.00050744	0.000565382
ABCB9	9304.26	-4.10353	0.279483	-14.6826	8.33708e-49	2.43686e-48
ABCC1	750.329	4.07956	0.355015	11.4913	1.4598e-30	2.76375e-30
ABCC10	541.733	2.9958	0.310275	9.65532	4.66698e-22	7.37228e-22
ABCC11	1407.54	-5.12695	0.256426	-19.9939	6.22931e-89	5.30618e-88
ABCC12	2898.7	-7.68107	0.344746	-22.2804	5.72568e-110	8.13731e-109
ABCC13	7645.63	-10.01	0.359454	-27.8479	1.14253e-170	5.01867e-169
ABCC2	2255.49	-5.40122	0.238182	-22.6768	7.58305e-114	1.16141e-112
ABCC3	3039.24	1.50009	0.422776	3.54818	0.000387901	0.000433282
ABCC4	13895.3	-3.9035	0.177572	-21.9827	4.21891e-107	5.60955e-106
ABCC5	2059.66	4.14621	0.334562	12.393	2.8528e-35	6.01257e-35
ABCC5-AS1	257.648	-9.8465	0.946028	-10.4082	2.27364e-25	3.83804e-25
ABCC6	1032.25	-3.38295	0.359725	-9.40427	5.23913e-21	8.11193e-21
ABCC6P1	175.947	-2.26207	0.356422	-6.3466	2.20124e-10	2.73654e-10
ABCC8	200.468	2.34072	0.565538	4.13893	3.48929e-05	3.97541e-05
ABCC9	617.865	1.65748	0.338377	4.89832	9.66576e-07	1.13275e-06
ABCD1	319.926	3.48408	0.379326	9.18493	4.11801e-20	6.26993e-20
ABCD1P3	45.0787	-8.4819	0.974525	-8.70362	3.21463e-18	4.70476e-18
ABCD1P4	27.5345	-7.7719	0.967613	-8.03203	9.5872e-16	1.32952e-15
ABCD2	452.949	3.5827	0.466872	7.67383	1.66929e-14	2.24816e-14
ABCD3	1863.49	6.52729	0.273787	23.8408	1.26271e-125	2.44451e-124
ABCD4	700.969	8.99434	0.440053	20.4392	7.49214e-93	7.07963e-92
ABCE1	1146.27	9.97695	0.641624	15.5495	1.60313e-54	5.39763e-54
ABCF1	1165.41	6.61629	0.448215	14.7614	2.59754e-49	7.70233e-49
ABCF2	1188.86	9.4732	0.422837	22.4039	3.60748e-111	5.24454e-110
ABCF3	847.114	9.75399	0.334604	29.1508	8.15086e-187	4.87568e-185
ABCG1	559.257	12.1881	0.759219	16.0535	5.40418e-58	1.98255e-57
ABCG2	921.498	11.0314	0.605861	18.2078	4.47538e-74	2.49854e-73
ABCG4	45.1236	4.59149	0.570837	8.04343	8.73554e-16	1.21274e-15
ABHD10	402.943	12.3553	0.742086	16.6494	3.05606e-62	1.24425e-61
ABHD11	205.233	11.7033	0.779381	15.0161	5.76006e-51	1.77812e-50
ABHD12	875.229	13.7957	0.706914	19.5153	8.13277e-85	6.15542e-84
ABHD13	279.185	6.44425	0.334315	19.276	8.54511e-83	6.10801e-82
ABHD14A	105.681	4.64894	0.356889	13.0263	8.6703e-39	1.98124e-38
ABHD14B	271.08	11.7837	0.731486	16.1093	2.19502e-58	8.12646e-58
ABHD15	192.024	6.55633	0.399877	16.3959	2.04707e-60	8.01219e-60
ABHD16A	130.283	11.0477	0.730956	15.114	1.30858e-51	4.09993e-51
ABHD17A	938.838	13.5762	0.748309	18.1425	1.47066e-73	8.10173e-73
ABHD17AP4	31.2364	-7.36713	0.956129	-7.70516	1.3068e-14	1.76409e-14
ABHD17B	279.359	7.96658	0.403477	19.7448	8.88736e-87	7.10855e-86
ABHD17C	251.556	9.93078	0.63647	15.6029	6.95603e-55	2.36388e-54
ABHD2	4638.78	13.5055	0.48128	28.0617	2.87811e-173	1.33008e-171
ABHD3	256.458	12.0245	0.714001	16.841	1.22167e-63	5.14143e-63
ABHD4	594.669	13.2378	0.718355	18.428	7.83972e-76	4.60674e-75
ABHD5	453.937	6.15669	0.240667	25.5818	2.43321e-144	6.64305e-143
ABHD6	394.17	3.10011	0.32921	9.41682	4.64962e-21	7.20547e-21
ABHD8	240.363	7.60447	0.452319	16.8122	1.98689e-63	8.3159e-63
ABI1	854.041	11.0516	0.478907	23.0766	7.9492e-118	1.3192e-116
ABI2	3487.59	8.15738	0.268598	30.3702	1.35983e-202	1.10022e-200
ABI3	269.086	12.0942	0.88047	13.7361	6.17189e-43	1.56347e-42
ABI3BP	101.351	10.3639	0.87748	11.811	3.42639e-32	6.73165e-32
ABL1	1611.17	4.99206	1.53225	3.25799	0.00112204	0.00124071
ABL2	2004.84	6.26087	0.371762	16.8411	1.21995e-63	5.13502e-63
ABLIM1	2988.79	14.6064	0.746552	19.5651	3.06677e-85	2.34581e-84
ABLIM2	174.935	9.6508	0.654198	14.7521	2.98186e-49	8.82426e-49
ABLIM3	406.358	12.6886	0.720299	17.6158	1.86499e-69	9.13753e-69
ABR	2553.28	8.46868	0.361181	23.4472	1.4129e-121	2.5174e-120
ABRACL	83.0115	9.1188	0.729137	12.5063	6.89705e-36	1.47594e-35
ABT1	237.704	9.87655	0.577463	17.1033	1.40133e-65	6.18093e-65
ABTB1	296.521	12.234	0.790297	15.4803	4.71357e-54	1.56819e-53
ABTB2	138.287	11.1342	0.864026	12.8865	5.36518e-38	1.20388e-37
AC000029.1	51.3102	-8.67184	1.07229	-8.08725	6.10276e-16	8.50164e-16
AC000081.2	61.0039	-4.82233	0.623609	-7.73294	1.05094e-14	1.42135e-14
AC000120.7	73.3899	8.40081	0.64785	12.9672	1.87727e-38	4.25323e-38
AC000123.2	286.372	11.8624	0.720343	16.4677	6.26308e-61	2.47428e-60
AC000123.3	71.6108	2.71152	0.419092	6.46998	9.80134e-11	1.22552e-10
AC000374.1	73.9472	-9.19751	0.944695	-9.73596	2.11814e-22	3.36815e-22
AC002044.1	27.0548	8.77892	0.824001	10.654	1.67015e-26	2.89099e-26
AC002066.1	71.369	-4.95356	0.421858	-11.7422	7.74086e-32	1.50933e-31
AC002117.1	41.1927	6.78182	0.576899	11.7556	6.60652e-32	1.29014e-31
AC002127.2	763.054	-8.67104	0.471276	-18.3991	1.33656e-75	7.79022e-75
AC002310.12	33.5271	3.79896	0.441663	8.6015	7.86813e-18	1.14193e-17
AC002310.17	109.936	-9.77443	0.940254	-10.3955	2.59851e-25	4.38117e-25
AC002429.5	63.5879	9.04216	1.04319	8.6678	4.40553e-18	6.42826e-18
AC002456.2	42.5875	1.30743	0.489786	2.66939	0.00759883	0.00824024
AC002464.1	93.4392	-9.53547	0.948879	-10.0492	9.26265e-24	1.51731e-23
AC002480.3	27.0731	8.1343	0.872266	9.32548	1.10484e-20	1.69891e-20
AC002486.2	46.7198	-8.53208	0.995319	-8.57221	1.0152e-17	1.47028e-17
AC003080.4	99.3723	8.58189	0.607869	14.118	2.94247e-45	7.90448e-45
AC003090.1	55.5062	5.05045	0.55345	9.1254	7.14703e-20	1.08199e-19
AC003104.1	60.6609	9.94297	0.774397	12.8396	9.83516e-38	2.19191e-37
AC003956.1	155.738	-10.2727	0.965979	-10.6345	2.05842e-26	3.55638e-26
AC003991.3	75.9893	8.9866	0.722362	12.4406	1.57382e-35	3.33707e-35
AC004004.2	41.2961	-7.19825	1.02536	-7.02021	2.21539e-12	2.85465e-12
AC004006.2	78.2933	-8.12515	1.0192	-7.97207	1.56037e-15	2.15266e-15
AC004009.2	85.4191	-9.40427	0.961906	-9.77671	1.41746e-22	2.26466e-22
AC004016.1	203.205	-9.5019	0.967047	-9.82569	8.72774e-23	1.40123e-22
AC004022.8	33.0364	-8.03163	0.975552	-8.23291	1.8272e-16	2.5725e-16
AC004051.2	33.6605	-5.96456	0.776378	-7.68255	1.55955e-14	2.10196e-14
[truncated: 25,066 more rows]
