# Supplementary material for: Network Analyses of Brain Tumor Patients’ Multiomic Data Reveals Pharmacological Opportunities to Alter Cell State Transitions
Source: bioRxiv preprint, doi:10.1101/2024.05.08.593202, version 1 (2024-05-10)
Supplement: Differentially Expressed Phosphoproteins [file 593202_file04.xlsx]

## Sheet: MES DEPPs
Phosphoprotein	logFC	AveExpr	t	P.Value	adj.P.Val	B
AAAS_S495	0.553844	-0.061431	4.12323	0.000113284	0.000283309	0.269994
AAK1_S18	-0.995286	-0.00484483	-5.62867	4.71e-07	1.75e-06	5.60355
AAK1_S20	-0.552178	0.0730741	-3.2499	0.00192628	0.00384705	-2.40668
AAK1_S637	1.64988	-0.27169	8.70217	2.47e-12	2.06e-11	17.6339
AAK1_S670	0.53623	0.0434583	3.1879	0.00243027	0.0047571	-2.50345
AAK1_S678	-0.871478	0.111862	-4.45644	3.57e-05	9.73e-05	1.38294
AAK1_S682	0.84486	-0.0936667	3.60943	0.000665019	0.00144538	-1.34582
AAK1_S797	1.13664	-0.113731	2.52083	0.0145917	0.0244754	-4.21918
AAK1_S938	-1.48771	-0.0834545	-4.88849	1.18e-05	3.51e-05	2.62947
AAK1_T606	-2.24788	0.253155	-11.1482	1.96e-16	3.7e-15	27.027
AAK1_T620	-3.22316	0.389207	-14.4018	2.02e-21	1.86e-19	38.4504
AAK1_T674	1.85972	-0.233544	11.4979	6.81e-17	1.45e-15	28.112
AAMDC_S46	-0.632299	0.0864828	-4.6045	2.11e-05	5.99e-05	1.89177
AARSD1_S174	-1.42919	0.0578077	-5.81642	3.04e-07	1.16e-06	6.11216
AATF_S203	0.871398	-0.170288	3.41273	0.00120317	0.00249325	-1.91121
ABCA1_S1141	1.35565	-0.0123333	6.31847	6.1e-08	2.59e-07	7.77204
ABCA1_S1145	2.09637	-0.140568	7.25545	3.04e-09	1.58e-08	10.7776
ABCA1_S1296	0.548138	0.101638	2.22254	0.029913	0.0468644	-4.9207
ABCA2_S1269	-2.50802	0.305316	-12.278	4.1e-18	1.19e-16	30.8891
ABCA2_S1358	-1.95573	0.295449	-9.77972	1.88e-13	1.92e-12	20.3174
ABCB6_S755	-0.587296	0.132208	-2.49465	0.0158333	0.0263602	-4.22689
ABCC1_S930	2.65806	-0.096434	9.20812	7.26e-13	6.68e-12	18.961
ABCC4_S404	0.543675	-0.104438	2.39564	0.0202377	0.0328947	-4.49931
ABCC4_T646	-0.807239	0.0798545	-5.46836	9.73e-07	3.44e-06	4.90977
ABCD3_S40	-2.08731	0.273192	-8.32912	2.28e-11	1.64e-10	15.5147
ABCF1_S105	-1.27668	0.289409	-4.10499	0.00015672	0.000381801	0.181447
ABCF1_S109	0.559891	-0.0136552	2.56589	0.012729	0.0216088	-4.16008
ABCF1_S140	1.55532	-0.214466	9.75408	3.98e-14	4.54e-13	21.7399
ABCF1_S22	0.559297	-0.0383793	4.03467	0.000152881	0.000373126	-0.0177085
ABCF1_S228	0.485683	-0.0547931	2.6773	0.0094915	0.0165347	-3.89424
ABCF1_T108	1.0391	-0.17281	5.06755	3.91e-06	1.26e-05	3.53253
ABI1_S183	-1.15945	0.0924655	-10.1966	7.21e-15	9.67e-14	23.4401
ABI1_S225	1.33089	-0.153377	6.41459	3.02e-08	1.34e-07	8.38143
ABI1_S323	1.56782	-0.161241	6.43272	2.06e-08	9.37e-08	8.68262
ABI2_S183	-1.7037	0.253776	-9.89989	2.26e-14	2.7e-13	22.3022
ABI2_S216	0.789289	-0.072037	2.68464	0.00945682	0.0164776	-3.8787
ABI2_S227	1.21565	-0.0712069	4.96709	5.66e-06	1.77e-05	3.17069
ABI2_S243	2.63278	-0.1757	6.71265	1.22e-08	5.78e-08	9.4456
ABI2_T175	-0.808675	0.0427292	-5.17352	3.77e-06	1.21e-05	3.67264
ABI2_T361	-0.377951	0.00696078	-3.18053	0.00241938	0.00473899	-2.5632
ABI3_S342	0.671277	-0.0713636	3.02755	0.00365588	0.00690644	-2.96208
ABL1_S16	0.790596	-0.109638	3.95399	0.000200326	0.000479456	-0.276623
ABL1_S702	0.958019	-0.22625	3.11405	0.00311394	0.00597195	-2.71719
ABL1_S737	1.94107	-0.2285	8.54221	7.78e-12	6.01e-11	16.5622
ABL1_S828	-0.658338	0.0655455	-4.11262	0.000123168	0.000305616	0.247336
ABL1_S903	1.41392	-0.160259	6.44245	1.98e-08	9.04e-08	8.72045
ABL1_T833	-0.571981	0.116159	-3.46046	0.00114448	0.00238316	-1.77562
ABL2_S631	0.359379	-0.0672759	2.53351	0.0138422	0.0233327	-4.23564
ABL2_S783	1.67669	-0.227429	13.7947	3.77e-19	1.53e-17	33.3622
ABL2_S936	-1.27297	-0.404265	-3.80696	0.000367787	0.000835106	-0.772
ABLIM1_S352	1.15183	-0.1695	4.74402	1.49e-05	4.35e-05	2.30263
ABLIM1_S422	0.558578	-0.123741	3.15505	0.00254653	0.00497184	-2.66779
ABLIM1_S452	0.385129	-0.115966	2.21234	0.0306457	0.0479047	-4.9419
ABLIM1_S455	-0.945	0.0292353	-3.07035	0.00332279	0.00633763	-2.85914
ABLIM1_S586	0.67622	-0.196155	3.36024	0.00133862	0.00274544	-2.07974
ABLIM1_S587	0.506795	-0.0544231	2.77825	0.00742984	0.0132085	-3.60591
ABLIM1_S655	0.567621	-0.197569	2.21557	0.0304121	0.0475822	-4.9352
ABLIM1_S669	0.672096	-0.114164	3.59488	0.000664738	0.00144495	-1.3622
ABLIM1_S706	1.01695	-0.109517	4.91467	6.87e-06	2.12e-05	2.98312
ABLIM1_T467	0.441831	-0.0827255	2.23248	0.0296867	0.046556	-4.84849
ABLIM1_T670	0.414295	-0.00610345	2.62304	0.0109604	0.018856	-4.02483
ABLIM1_Y675	1.09751	-0.242542	3.52399	0.000897583	0.00190454	-1.5655
ABLIM2_S17	-2.99086	0.0242414	-8.26732	1.39e-11	1.04e-10	15.9176
ABLIM2_S279	-1.70234	0.0701111	-7.3775	6.91e-10	3.98e-09	12.1099
ABLIM2_S294	-3.52604	0.084383	-8.84109	7.43e-12	5.77e-11	16.6847
ABLIM2_S364	-3.50276	0.279259	-12.4537	5.2e-18	1.47e-16	30.6859
ABLIM2_S382	-3.16428	0.219948	-9.69308	5.04e-14	5.66e-13	21.5042
ABLIM2_S479	-2.97286	0.215843	-9.56997	2.71e-13	2.69e-12	19.9315
ABLIM2_S485	-1.17733	0.0481379	-3.9679	0.000191237	0.000459406	-0.23218
ABLIM3_S282	-3.01587	0.395068	-11.3803	3.26e-15	4.66e-14	24.4379
ABLIM3_S373	-0.725603	0.111879	-2.94127	0.00459448	0.00850986	-3.22933
ABLIM3_S394	-1.14314	0.0649138	-5.21438	2.26e-06	7.57e-06	4.06662
ABLIM3_S409	-1.89712	0.18648	-9.39253	6.17e-13	5.75e-12	19.1544
ABLIM3_S503	-1.16266	0.15631	-5.59952	5.26e-07	1.94e-06	5.4941
ABLIM3_S567	-1.15165	0.123568	-6.74673	1.83e-08	8.4e-08	9.00195
ABLIM3_S576	-1.56367	0.18219	-7.80335	8.82e-11	5.84e-10	14.0806
ABR_S312	-2.34592	0.271302	-11.4323	2.31e-16	4.28e-15	26.9384
ABR_T333	-1.22519	0.122034	-8.75696	1.99e-12	1.68e-11	17.8496
ACACA_S62	1.1884	-0.381897	4.59261	2.2e-05	6.23e-05	1.85061
ACAP2_S379	-1.31345	0.243755	-7.86192	1.9e-10	1.2e-09	13.4762
ACAP2_S384	0.456955	-0.0693966	2.36263	0.0213063	0.0344805	-4.62131
ACAP2_S521	-1.29907	0.191069	-11.1802	1.74e-16	3.3e-15	27.1461
ACAP3_S388	-1.08429	0.0545172	-6.94194	2.74e-09	1.44e-08	10.6755
ACBD3_S43	1.40854	-0.0324906	6.21542	6.43e-08	2.72e-07	7.67993
ACBD5_S205	0.703828	-0.00884783	4.01273	0.000201507	0.000481887	-0.129534
ACBD5_S453	-0.629631	0.16636	-4.19757	0.000101682	0.000256278	0.456661
ACBD7_T68	0.781383	0.14569	2.47245	0.0161835	0.0268969	-4.37599
ACD_S425	-0.336564	0.0579333	-2.23502	0.0300227	0.0470151	-4.78655
ACIN1_S208	1.13624	-0.131741	3.66163	0.000521033	0.00115153	-1.18799
ACIN1_S243	0.586808	-0.0176415	2.32402	0.0237228	0.0379961	-4.65634
ACIN1_S365	0.582308	-0.00182759	4.11895	0.000114946	0.000287176	0.256003
ACIN1_S400	0.909599	-0.0114386	4.66905	1.71e-05	4.93e-05	2.14235
ACIN1_S410	1.02021	-0.121685	7.16609	1.56e-09	8.5e-09	11.3004
ACIN1_S425	-0.814884	-0.177396	-3.37434	0.00133846	0.00274543	-2.06057
ACIN1_S478	1.22938	-0.168052	4.41456	4.14e-05	0.000111372	1.24055
ACIN1_S561	1.3824	-0.20051	5.8269	3.44e-07	1.3e-06	6.05918
ACIN1_S655	-0.848386	0.128547	-5.94034	1.82e-07	7.22e-07	6.61244
ACIN1_S667	1.5748	-0.114455	10.6051	3.73e-14	4.28e-13	22.0181
ACIN1_S710	1.68773	-0.127828	10.2365	6.18e-15	8.39e-14	23.5926
ACIN1_S825	3.27161	-0.3765	12.743	5.96e-19	2.27e-17	32.7971
ACIN1_S838	0.945218	-0.0961207	5.00766	4.88e-06	1.54e-05	3.31645
ACIN1_S863	1.78801	-0.206	7.57281	6.93e-10	3.99e-09	12.2125
ACIN1_S898	0.967211	-0.128207	5.35108	1.35e-06	4.67e-06	4.56913
ACIN1_T563	0.453909	0.110827	2.42402	0.018614	0.0304858	-4.43761
ACIN1_T902	0.479515	-0.0574483	3.29166	0.00164873	0.00332745	-2.27538
ACLY_S509	2.58026	-0.250569	9.94509	1.9e-14	2.3e-13	22.4761
ACLY_S511	1.17296	0.0126364	4.68489	2.35e-05	6.62e-05	1.96225
ACO1_T628	-1.07934	0.262315	-4.94328	6.93e-06	2.13e-05	3.03842
ACO2_S559	-1.56137	0.224979	-8.3268	3.98e-11	2.76e-10	15.0021
ACP1_Y132	-0.426313	0.0687955	-2.57957	0.0130214	0.022048	-4.03563
ACSL3_S683	-2.17417	0.257983	-9.35571	1.88e-13	1.91e-12	20.1945
ACSL4_S57	-3.06791	0.184706	-11.1673	9.62e-16	1.55e-14	25.5451
ACTL6A_S233	0.930288	-0.140845	5.03604	4.39e-06	1.4e-05	3.41871
ACTN1_S172	2.33454	-0.284527	7.1458	1.55e-09	8.45e-09	11.2986
ACTN4_S656	-1.49332	0.2436	-7.56727	5.03e-10	2.96e-09	12.4993
ACTR10_S241	-2.58771	0.21014	-13.8306	2.32e-19	1e-17	33.834
ADAM10_S740	2.1627	-0.166122	7.24091	1.88e-09	1.01e-08	11.2495
ADAM17_S791	2.08336	-0.222667	8.60155	4.17e-12	3.37e-11	17.1529
ADAM22_S839	-3.16784	0.277724	-12.653	8.2e-19	2.97e-17	32.4801
ADAM22_S841	-2.46462	0.278151	-10.2176	1.76e-14	2.15e-13	22.6324
ADAM22_S863	-3.43344	0.188448	-11.8345	1.56e-17	3.86e-16	29.5491
ADAM22_S924	-4.22826	0.470393	-13.9375	1.9e-20	1.23e-18	36.2452
ADAM22_S928	-4.46162	0.312018	-15.1451	5.79e-22	6.23e-20	39.7208
ADAM22_T887	-1.89055	0.162542	-7.55088	6.68e-10	3.86e-09	12.1998
ADAM9_S733	1.03424	-0.0649138	3.75364	0.000387255	0.000875631	-0.905845
ADAM9_T761	-0.525535	0.108569	-4.00284	0.000170138	0.0004123	-0.120216
ADAR_T601	0.89007	0.0348448	4.62942	1.93e-05	5.51e-05	1.97823
ADCY2_S472	-2.68761	0.410655	-11.2016	1.61e-16	3.08e-15	27.2256
ADCY3_S525	-1.14203	0.163836	-8.49517	8.17e-12	6.29e-11	16.5037
ADCY6_S54	-0.6895	0.108077	-4.09035	0.000139674	0.000343393	0.140683
ADCY6_S576	0.441147	-0.0288333	2.49953	0.0152959	0.0255607	-4.26755
ADCY9_S1307	-0.965022	0.0355435	-4.2231	0.000102111	0.000257247	0.524914
ADCY9_S688	0.765355	0.0921739	3.23314	0.00217424	0.00430183	-2.39038
ADCY9_S691	0.875082	0.0823148	3.91776	0.000238768	0.000563723	-0.382823
ADD1_S12	-2.19959	0.0419483	-10.4893	2.35e-15	3.46e-14	24.554
ADD1_S355	-2.82544	0.394392	-16.1625	1.63e-22	2.28e-20	41.0054
ADD1_S358	-1.96038	0.254931	-12.1924	4.26e-18	1.23e-16	30.8411
ADD1_S408	-2.04628	0.298563	-9.23239	1.57e-12	1.35e-11	18.2508
ADD1_S427	-1.62339	0.158137	-9.84322	1.01e-13	1.08e-12	20.9122
ADD1_S431	-0.735336	0.0588793	-3.63869	0.000560687	0.00123292	-1.25761
ADD1_S514	-0.449628	0.164586	-2.3732	0.020757	0.0336542	-4.59811
ADD1_S648	-1.53546	0.11069	-4.72378	1.38e-05	4.02e-05	2.30758
ADD1_S662	-4.47226	0.499603	-14.2504	3.35e-21	2.84e-19	37.9494
ADD1_T11	-2.37711	0.098963	-8.77364	3.21e-12	2.63e-11	17.4095
ADD2_S528	-2.58376	0.171565	-7.63654	6.21e-10	3.6e-09	12.3312
ADD2_S530	-2.53837	0.060069	-9.9043	2.22e-14	2.66e-13	22.3191
ADD2_S549	-1.7025	0.0189592	-7.09018	3.28e-09	1.69e-08	10.6119
ADD2_S592	-3.83259	0.128569	-10.9882	3.57e-16	6.34e-15	26.431
ADD2_S596	-1.91137	0.226552	-10.1054	1.02e-14	1.32e-13	23.0913
ADD2_S60	-2.29416	0.106706	-8.26254	3.33e-11	2.34e-10	15.146
ADD2_S600	-4.30365	0.519679	-18.4049	2.55e-26	2.78e-23	49.6309
ADD2_S604	-5.32358	0.710982	-18.822	4.71e-27	8.2e-24	51.2908
ADD2_S613	-3.42645	0.412017	-14.5105	1.41e-21	1.36e-19	38.8085
ADD2_S617	-6.45679	0.0784118	-13.4165	5.83e-19	2.24e-17	32.9071
ADD2_S62	-4.22657	0.349756	-7.49191	1.17e-09	6.53e-09	11.7107
ADD2_S621	-4.11127	0.305094	-9.54532	2.07e-13	2.09e-12	20.1498
ADD2_S693	-3.60215	0.193392	-10.1751	3.09e-14	3.6e-13	22.0926
ADD2_S697	-3.25989	0.254845	-15.3504	9.14e-23	1.39e-20	41.5222
ADD2_S699	-2.8488	0.148259	-10.8428	6.17e-16	1.03e-14	25.8869
ADD2_S701	-2.46106	0.153614	-11.2224	5.33e-15	7.29e-14	23.9515
ADD2_T552	-3.29345	0.191155	-12.1039	5.86e-18	1.63e-16	30.5233
ADD3_S423	-2.56557	0.342534	-9.19957	3.47e-13	3.39e-12	19.5853
ADD3_S585	-3.31501	0.232724	-12.4735	1.55e-18	5.16e-17	31.8445
ADD3_S590	-2.40532	0.126468	-8.82956	7.73e-12	5.99e-11	16.6443
ADD3_S600	-4.04354	0.453689	-9.72439	5.23e-13	4.97e-12	19.3523
ADD3_S673	-0.678608	0.0351379	-3.40056	0.00118296	0.00245507	-1.96343
ADD3_S681	0.73951	0.0477586	3.17229	0.00235538	0.0046261	-2.60907
ADGRA1_S346	-2.68989	0.0191724	-9.72645	4.43e-14	5.03e-13	21.6332
ADGRA1_S447	-2.07306	0.289069	-9.31679	2.19e-13	2.2e-12	20.0428
ADGRA1_T223	-2.15563	0.102532	-12.3433	6.48e-17	1.39e-15	28.278
ADGRA2_S1107	-1.05421	0.180783	-5.33546	2.33e-06	7.78e-06	4.20486
ADGRB1_S1278	-0.676603	-0.0897241	-2.98849	0.00401777	0.00752404	-3.10537
ADGRB1_S1291	-2.0219	-0.13375	-7.81337	2.56e-10	1.58e-09	13.188
ADGRB2_S1225	-2.31225	0.158761	-8.40541	4.05e-11	2.81e-10	15.0422
ADGRB2_S1510	-0.590476	0.0343404	-3.13633	0.0028431	0.0054985	-2.51192
ADGRB2_S1527	-3.41575	0.33675	-12.6829	4.43e-18	1.27e-16	30.8812
ADGRB2_S1542	0.648977	-0.0529483	2.58564	0.0120906	0.0206154	-4.11362
ADGRB3_S1220	-2.84968	-0.109259	-8.72849	3.82e-12	3.1e-11	17.2693
ADGRG1_S201	0.848832	0.0334909	2.62717	0.0109614	0.018856	-3.96967
ADGRG1_S676	-0.653817	-0.12487	-2.77892	0.00767112	0.0135945	-3.49987
ADGRL1_S1129	-3.11894	0.451034	-11.9716	9.46e-18	2.5e-16	30.0461
ADGRL1_S1377	-2.60545	0.0534912	-9.93959	2.31e-14	2.76e-13	22.2895
ADGRL3_S1235	-1.44946	-0.276103	-3.93123	0.000216087	0.000513442	-0.349084
ADGRL3_S1509	-0.458664	-0.0856034	-2.4384	0.0176389	0.0290553	-4.45304
ADGRL3_T1521	-1.11924	-0.0721207	-5.12886	3.11e-06	1.02e-05	3.7548
ADH5_S351	-1.31688	0.315021	-7.48318	8.56e-10	4.86e-09	11.9925
ADNP_S409	0.977283	0.0134138	4.98365	5.33e-06	1.68e-05	3.23015
ADNP_S709	1.22535	-0.121543	6.67318	1.98e-08	9.01e-08	8.90358
ADNP_S921	1.26087	-0.175833	7.55934	3.42e-10	2.07e-09	12.7715
ADRA1B_S406	-2.16678	0.0155217	-5.59483	9.35e-07	3.31e-06	5.101
ADRM1_T217	0.751396	-0.0861163	3.06054	0.00365101	0.00689873	-2.8013
AEBP2_S206	-0.793113	0.0558448	-5.82913	2.18e-07	8.52e-07	6.36093
AEBP2_S24	0.28001	-0.0693958	2.4486	0.0177612	0.0292403	-4.33006
AES_S92	-1.9221	0.234917	-6.0216	1.8e-07	7.15e-07	6.70571
AFAP1_S278	1.1624	-0.23296	3.97335	0.000212268	0.00050492	-0.250996
AFAP1_S282	0.872875	-0.07966	3.39754	0.00128549	0.00264674	-1.96511
AFAP1_S632	2.56284	-0.522185	8.50775	8.87e-12	6.8e-11	16.3993
AFAP1_S752	0.697089	-0.0170926	3.29299	0.00169423	0.00341215	-2.28628
AFAP1_S795	1.73014	-0.301642	6.92903	4.23e-09	2.15e-08	10.323
AFAP1_T773	0.993619	-0.136041	4.10406	0.00014122	0.000346804	0.195551
AFAP1L1_S329	1.44646	-0.0589298	5.31529	1.6e-06	5.48e-06	4.45145
AFAP1L1_S745	1.8666	-0.168	5.85316	2.08e-07	8.15e-07	6.45464
AFAP1L2_S537	0.56959	-0.123017	2.88083	0.00544463	0.00993565	-3.3858
AFAP1L2_S693	-0.731966	0.0499483	-5.76394	2.8e-07	1.08e-06	6.11373
AFDN_S1042	-1.51633	0.368517	-9.55564	8.61e-14	9.32e-13	20.9718
AFDN_S1066	0.473535	-0.0075	2.82168	0.00641535	0.0115511	-3.53652
AFDN_S1132	-0.880599	-0.0506207	-5.18582	2.52e-06	8.36e-06	3.96225
AFDN_S1234	0.594497	-0.194086	2.25056	0.02798	0.0441695	-4.86207
AFDN_S1274	1.06858	-0.234667	4.18947	0.000102377	0.000257826	0.444706
AFDN_S1653	-0.902239	0.0384884	-4.92949	1.07e-05	3.21e-05	2.78673
AFDN_S1678	-0.625381	-0.0556724	-3.77759	0.000358249	0.000815865	-0.831696
AFDN_S1736	-1.65312	0.0843269	-9.30361	6.01e-13	5.62e-12	19.1277
AFDN_S1756	0.847342	-0.204348	3.54614	0.00086163	0.00183562	-1.45777
AFDN_S350	-3.09244	0.214086	-14.0863	5.8e-21	4.53e-19	37.403
AFDN_S383	-0.770321	0.113889	-3.67709	0.000586968	0.0012873	-1.08827
AFDN_S471	0.364522	-0.038931	2.24834	0.0281287	0.0443841	-4.86672
AFDN_S516	0.458571	0.135217	2.25249	0.0287269	0.0452497	-4.75106
AFDN_S614	-3.7024	0.524884	-12.8057	6.55e-17	1.4e-15	28.3287
AFDN_T1161	-0.49529	-0.142879	-2.41954	0.0184946	0.0303131	-4.49534
AFDN_T1289	0.898071	-0.180043	3.99738	0.00020751	0.000494682	-0.2127
AFF4_S1058	1.01257	-0.119962	7.14568	2.02e-09	1.08e-08	11.0652
AFF4_S1062	0.350326	-0.00457407	2.22613	0.0299165	0.0468657	-4.86359
AFF4_S212	0.958438	-0.0913966	5.60512	5.15e-07	1.9e-06	5.5151
AFF4_S487	-0.731796	0.143759	-4.35104	5.17e-05	0.00013668	1.02588
AFF4_S491	0.565807	-0.0893654	3.00499	0.00397236	0.00744621	-3.02872
AFF4_S549	1.34031	-0.127686	7.91056	1.24e-10	8.06e-10	13.838
AFF4_S620	-0.63146	0.114414	-3.88795	0.000249422	0.000586653	-0.486236
AFF4_S694	1.19872	-0.166397	6.28122	3.74e-08	1.63e-07	8.09496
AFF4_S706	1.19856	-0.409226	4.87577	9.1e-06	2.75e-05	2.77913
AFF4_S814	0.724785	-0.121793	6.16144	5.98e-08	2.54e-07	7.63242
AFF4_S836	0.730063	-0.126	3.48769	0.000903103	0.00191462	-1.70888
AFF4_T336	0.475004	-0.0636	2.46316	0.0173446	0.0286219	-4.29828
AFF4_T528	0.54314	-0.130059	2.72567	0.00859666	0.0150844	-3.73592
AFF4_T674	1.63869	-0.244102	8.62746	1.16e-11	8.78e-11	16.2201
AFTPH_S411	0.906923	-0.045614	5.53586	6.97e-07	2.52e-06	5.26544
AFTPH_S517	1.39359	-0.070431	8.11032	2.59e-11	1.85e-10	15.2964
AFTPH_S518	0.868321	0.0378333	4.56175	3.14e-05	8.63e-05	1.65397
AGAP1_S339	1.30193	-0.258759	3.85192	0.000280881	0.000654287	-0.599675
AGAP1_S605	-0.69565	0.113792	-5.39226	1.73e-06	5.9e-06	4.43254
AGAP1_T836	1.28506	-0.364627	4.93323	7.89e-06	2.41e-05	3.03383
AGAP2_S1177	1.18307	-0.306845	3.72681	0.000422429	0.000948887	-0.988586
AGAP2_S147	-0.920523	-0.0219038	-4.79473	1.25e-05	3.69e-05	2.47639
AGAP2_S211	-2.6352	0.134566	-9.43337	3.14e-13	3.09e-12	19.7642
AGAP2_S33	-0.940413	0.094069	-6.93316	2.84e-09	1.48e-08	10.641
AGAP2_S752	-0.706095	-0.0525102	-2.47026	0.0167641	0.027785	-4.28145
AGAP2_T809	-0.763958	0.0423182	-3.27569	0.0019649	0.00391834	-2.3354
AGAP3_S305	-1.75559	0.118549	-6.95306	4.57e-09	2.3e-08	10.2653
AGAP3_S479	0.458585	-0.172241	2.75091	0.00778559	0.0137861	-3.7137
AGAP3_S574	-0.863107	-0.00062069	-4.11297	0.000117309	0.000292491	0.236462
AGFG1_S167	0.787136	-0.0497115	4.59288	2.53e-05	7.08e-05	1.78951
AGFG1_S181	1.85786	-0.217089	7.65425	1.94e-10	1.22e-09	13.3913
AGFG1_S317	1.12448	-0.0411207	5.11613	3.26e-06	1.06e-05	3.70856
AGFG2_S217	-0.988269	0.236447	-2.86447	0.00605744	0.0109667	-3.39928
AGO3_S825	-0.689308	0.0961132	-3.79346	0.000362292	0.000824319	-0.776716
AGPS_S65	-0.668346	0.0821176	-3.89369	0.000270176	0.000631969	-0.487121
AHCTF1_S1169	0.347023	-0.0496034	2.38234	0.020292	0.0329676	-4.57796
AHCTF1_S1241	1.81388	-0.31981	6.68059	7.74e-09	3.77e-08	9.64976
AHCTF1_S1550	0.602655	-0.103638	3.69542	0.00046745	0.00104116	-1.08489
AHCYL1_S85	-3.48498	0.571698	-11.7078	8.89e-17	1.82e-15	27.8723
AHCYL2_S166	-2.61888	0.593302	-9.56249	1.94e-13	1.97e-12	20.2407
AHDC1_S957	0.660528	-0.0511897	3.96625	0.000192298	0.000461573	-0.237476
AHDC1_T1401	0.649413	-0.0549138	3.18637	0.00225927	0.00445641	-2.57018
AHDC1_T99	1.26933	-0.214396	4.80896	1.15e-05	3.42e-05	2.54766
AHNAK_S1007	1.52795	0.068566	4.10586	0.000130344	0.000322227	0.202235
AHNAK_S1068	1.57973	-0.0986207	4.18373	9.21e-05	0.000233964	0.468556
AHNAK_S135	0.703948	0.103603	2.81809	0.00647929	0.011659	-3.54562
AHNAK_S1452	1.93324	-0.0928421	5.9037	1.71e-07	6.82e-07	6.64579
AHNAK_S1580	1.00141	0.00287273	2.8881	0.00541563	0.00988688	-3.32524
AHNAK_S177	1.0953	-0.159625	4.51951	3.62e-05	9.86e-05	1.46677
AHNAK_S2185	1.69973	0.0249348	4.88591	1.11e-05	3.3e-05	2.68042
AHNAK_S2387	1.19251	0.0288868	3.39067	0.00127392	0.00262571	-1.96909
AHNAK_S256	-0.7703	0.178348	-2.67643	0.0100446	0.01742	-3.80755
AHNAK_S2580	1.61788	0.0702759	4.72462	1.37e-05	4.01e-05	2.31053
AHNAK_S2708	3.04735	-0.204596	7.34032	6.1e-10	3.54e-09	12.2075
AHNAK_S3220	3.04735	-0.204596	7.34032	6.1e-10	3.54e-09	12.2075
AHNAK_S332	0.780659	-0.00941818	3.06668	0.00326774	0.00624014	-2.90375
AHNAK_S337	-0.747398	0.179578	-2.40538	0.0199895	0.032543	-4.42549
AHNAK_S3412	0.836796	-0.263449	2.41601	0.019181	0.031335	-4.45485
AHNAK_S3483	0.869096	-0.0640851	2.68283	0.00982466	0.017069	-3.84292
AHNAK_S379	1.16549	-0.0651379	3.41734	0.00112338	0.00234258	-1.91476
AHNAK_S41	-0.567796	0.0913103	-3.06171	0.00325522	0.00621895	-2.91027
AHNAK_S4425	1.03024	-0.123804	2.54705	0.0139981	0.023575	-4.04725
AHNAK_S4850	1.13246	-0.0471364	3.27921	0.00194503	0.00388271	-2.27607
AHNAK_S4908	2.08036	-0.21518	6.06568	1.35e-07	5.48e-07	6.97114
AHNAK_S4995	1.82702	-0.176854	3.15845	0.0026452	0.00515064	-2.52182
AHNAK_S511	0.909283	-0.0550345	3.31189	0.00155081	0.00314547	-2.21795
AHNAK_S5298	1.11565	0.0452083	4.80863	1.35e-05	3.95e-05	2.42814
AHNAK_S5448	1.03013	-0.0390517	4.17655	9.44e-05	0.000239367	0.444916
AHNAK_S570	1.28622	0.0915882	4.33802	6.22e-05	0.000162585	0.925965
AHNAK_S572	0.957542	-0.0770217	2.73787	0.00855168	0.015016	-3.59936
AHNAK_S5731	1.2583	-0.0943966	4.6389	1.87e-05	5.33e-05	2.01116
AHNAK_S5739	0.684	0.00386207	2.48065	0.0158495	0.0263845	-4.35729
AHNAK_S5746	1.63503	-0.0349231	5.14706	3.55e-06	1.15e-05	3.75118
AHNAK_S5749	1.42122	-0.0495345	5.93477	1.45e-07	5.84e-07	6.76311
AHNAK_S5752	0.775655	-0.105483	4.00667	0.000167966	0.000407659	-0.107905
AHNAK_S5763	0.69405	-0.00175862	3.2561	0.00183501	0.00367572	-2.37569
AHNAK_S5780	1.70442	-0.0912982	4.64066	1.9e-05	5.42e-05	2.04396
AHNAK_S5782	0.756837	-0.0986034	2.69377	0.00908263	0.0158844	-3.85419
AHNAK_S5784	0.751585	-0.123707	2.44546	0.0173277	0.0285977	-4.43713
AHNAK_S5830	1.74493	-0.330769	3.79131	0.000369851	0.00083945	-0.791916
AHNAK_S5851	0.78541	-0.157241	2.40552	0.0191543	0.0312973	-4.5266
AHNAK_S5857	1.71791	-0.0454706	5.56159	8.19e-07	2.93e-06	5.10688
AHNAK_S5863	1.27353	-0.26983	3.5184	0.000861861	0.00183589	-1.60016
AHNAK_S698	1.36427	-0.0728431	4.18648	0.000103402	0.000260311	0.485137
AHNAK_S819	1.25194	0.0564483	4.98273	5.35e-06	1.68e-05	3.22683
AHNAK_S886	1.02256	-0.00784314	3.0213	0.00381912	0.00718833	-2.98851
AHNAK_T4100	0.846896	-0.138741	2.93115	0.00472758	0.00873411	-3.25568
AHNAK_T4430	1.37474	-0.0773621	5.49932	7.71e-07	2.77e-06	5.11934
AHNAK_T4766	1.28551	-0.0745172	4.46808	3.43e-05	9.36e-05	1.42263
AHNAK_T490	0.615655	0.103345	2.63125	0.0107258	0.018489	-4.00522
AHNAK2_S294	-1.29766	0.0194828	-6.94351	2.72e-09	1.43e-08	10.6817
AHNAK2_S332	2.52416	0.0652407	4.54893	2.81e-05	7.81e-05	1.72744
AHNAK2_S365	-0.978487	0.172413	-3.16222	0.00266515	0.00518528	-2.58106
AHNAK2_S5175	-1.45638	0.0227241	-5.1356	3.03e-06	9.94e-06	3.77932
AHNAK2_S842	1.22794	-0.0138276	2.93779	0.0046398	0.00858377	-3.23839
AHSA1_S218	-2.61272	0.421844	-13.1915	1.02e-17	2.67e-16	30.1462
AHSG_S329	-0.423712	0.00125862	-2.60699	0.011433	0.0195784	-4.06305
AHSG_S331	-0.90973	0.00687931	-3.85146	0.000281311	0.000655115	-0.601138
AIDA_S144	-1.09762	-0.0369434	-7.17837	1.63e-09	8.82e-09	11.2688
AIDA_S162	-2.35351	0.274138	-10.7171	9.92e-16	1.6e-14	25.4143
AIF1_S39	0.723522	0.0763621	2.37369	0.0207317	0.0336163	-4.59703
AIP_S159	-2.03743	0.273294	-13.414	5.88e-19	2.25e-17	32.8992
AJM1_S109	-2.02492	0.205517	-14.9644	3.18e-22	3.93e-20	40.2862
AJM1_S319	-3.74249	0.251926	-13.6381	1.01e-19	4.88e-18	34.6056
AJM1_S434	-1.96268	0.151439	-8.49595	6.32e-12	4.95e-11	16.7078
AJM1_S448	-2.15828	0.270135	-12.1812	2.35e-17	5.51e-16	29.2263
AJM1_S468	-2.37884	0.277852	-12.4055	6.13e-18	1.69e-16	30.5224
AJM1_S499	-2.52754	0.324472	-13.3818	3.27e-19	1.35e-17	33.4592
AJM1_S509	-2.52594	0.344383	-14.5849	8.41e-20	4.23e-18	34.8721
AJM1_S856	-3.96559	0.421207	-15.238	1.31e-22	1.92e-20	41.1642
AJUBA_S263	2.35557	-0.151035	10.9247	5.63e-16	9.48e-15	26.0123
AK1_S54	-1.38316	0.275466	-8.31936	1.13e-11	8.57e-11	16.1234
AKAP1_S445	-1.75368	0.0633488	-9.81512	6.05e-13	5.65e-12	19.288
AKAP1_S592	0.597642	-0.0362069	2.65328	0.0101181	0.0175351	-3.95232
AKAP1_T533	-0.742703	0.0696552	-5.34035	1.41e-06	4.85e-06	4.52952
AKAP1_T70	-1.31279	0.121944	-8.65655	5.02e-12	4e-11	16.9965
AKAP10_S96	0.535088	-0.184276	2.35379	0.0217761	0.0351495	-4.64067
AKAP11_S1289	1.07519	0.0302222	3.30789	0.00176954	0.00355314	-2.1921
AKAP11_S1526	-0.59375	0.0871373	-2.78907	0.00725369	0.0129204	-3.58047
AKAP11_S18	1.06668	-0.0353256	5.14954	5.1e-06	1.61e-05	3.51397
AKAP11_T1100	-0.512036	0.0355106	-3.33096	0.00161772	0.00326976	-2.11715
AKAP11_T1485	-0.721567	0.0898448	-3.51231	0.000836215	0.00178597	-1.63618
AKAP11_Y424	0.511376	-0.0400862	2.93213	0.00471452	0.00871093	-3.25313
AKAP12_S1226	0.571511	0.0449615	2.27524	0.026751	0.0424137	-4.7597
AKAP12_S1295	1.32247	-0.194098	3.88803	0.000275149	0.000642138	-0.504574
AKAP12_S1328	-3.51907	0.394941	-12.4977	1.11e-17	2.88e-16	29.9798
AKAP12_S1395	-1.93774	0.2965	-7.087	1.54e-09	8.38e-09	11.2469
AKAP12_S1497	1.03316	0.00344444	3.23072	0.00221222	0.00437053	-2.40192
AKAP12_S1512	1.2851	0.0932414	3.81606	0.000315959	0.000728791	-0.711959
AKAP12_S1587	1.26714	0.0192931	3.55175	0.000738752	0.00159154	-1.51898
AKAP12_S1674	-0.76095	0.147625	-4.23316	9.43e-05	0.000239155	0.540414
AKAP12_S1727	-2.83314	0.263421	-10.2287	7.69e-15	1.03e-13	23.3862
AKAP12_S253	-1.20259	0.127923	-5.02078	5.59e-06	1.75e-05	3.25988
AKAP12_S283	-2.91358	0.303824	-10.228	2.56e-14	3.03e-13	22.2798
AKAP12_S286	-1.23643	0.191655	-6.3273	3.12e-08	1.38e-07	8.2734
AKAP12_S290	-0.903638	0.133391	-5.47469	1.43e-06	4.92e-06	4.63954
AKAP12_S381	1.03981	-0.0649828	3.53916	0.000768632	0.00165143	-1.5565
AKAP12_S386	-0.649087	0.203	-2.91693	0.00521419	0.00954612	-3.21333
AKAP12_S388	0.70907	0.00993103	3.96895	0.000190572	0.000458061	-0.228846
AKAP12_S472	-1.25144	0.114638	-5.00892	4.85e-06	1.54e-05	3.32099
AKAP12_S483	-3.46948	0.208552	-10.1526	8.54e-15	1.13e-13	23.2718
AKAP12_S554	-3.90674	0.393034	-14.4033	2.01e-21	1.86e-19	38.4555
AKAP12_S557	-1.81495	0.123175	-5.58211	5.85e-07	2.14e-06	5.39597
AKAP12_S566	-2.63189	0.446621	-14.7058	7.4e-22	7.82e-20	39.4477
AKAP12_S568	-2.74018	0.314885	-11.3098	4.57e-16	7.84e-15	26.2739
AKAP12_S569	-2.41416	0.387672	-10.1753	7.82e-15	1.04e-13	23.3588
AKAP12_S598	-1.05004	0.0778966	-7.1426	1.23e-09	6.83e-09	11.4662
AKAP12_S627	-1.25639	0.172121	-5.54995	6.36e-07	2.32e-06	5.3084
AKAP12_S629	-1.84703	0.174241	-8.76237	1.94e-12	1.65e-11	17.8709
AKAP12_S640	0.666256	0.0878511	3.04846	0.0036455	0.00688907	-2.92877
AKAP12_S696	-1.86845	0.264073	-7.86601	9.39e-11	6.17e-10	14.0456
AKAP12_S697	-1.60197	0.2125	-9.76266	3.85e-14	4.4e-13	21.7731
AKAP12_S732	1.26587	-0.117604	3.92818	0.00023423	0.000553683	-0.308846
AKAP12_S742	-1.96374	0.216766	-5.481	1.33e-06	4.59e-06	4.70293
AKAP12_S743	-2.42036	0.313429	-6.52279	2.67e-08	1.19e-07	8.53486
AKAP12_S749	-3.07017	0.241021	-6.66466	1.72e-08	7.92e-08	8.98141
AKAP12_S75	1.02606	-0.0203793	4.66403	1.71e-05	4.91e-05	2.09864
AKAP12_S841	-0.917625	0.172444	-4.73056	1.48e-05	4.32e-05	2.29823
AKAP12_S96	-0.536611	0.1088	-2.98362	0.00427517	0.00797096	-3.0371
AKAP12_T1116	-2.25683	0.0205862	-7.48117	3.19e-10	1.94e-09	12.8046
AKAP12_T1175	-0.646022	0.141691	-3.39027	0.0012524	0.00258596	-2.00604
AKAP12_T160	1.63352	-0.217417	4.26672	8.44e-05	0.000215829	0.696527
AKAP12_T1730	-2.98857	0.214948	-9.69371	5.03e-14	5.65e-13	21.5066
AKAP12_T1760	-0.96514	-0.101745	-3.32354	0.00158817	0.00321563	-2.16851
AKAP12_T548	-1.68084	0.02772	-5.57447	8.19e-07	2.93e-06	5.15402
AKAP12_T597	-1.08069	-0.06868	-3.4348	0.00114901	0.00239088	-1.8078
AKAP12_T751	-1.89522	0.322191	-7.75906	3.54e-10	2.13e-09	12.8799
AKAP12_T796	0.73041	-0.0310667	2.23396	0.030097	0.0471231	-4.78873
AKAP13_S1281	0.829981	0.0147955	3.96083	0.000247557	0.0005825	-0.31522
AKAP13_S1489	0.571916	0.113867	2.85372	0.00632209	0.0113973	-3.42987
AKAP13_S1507	-1.01439	0.234241	-5.36513	1.28e-06	4.45e-06	4.62102
AKAP13_S1565	1.77067	-0.0593103	10.2461	5.96e-15	8.1e-14	23.6289
AKAP13_S1604	0.469889	0.139019	2.43563	0.0179691	0.0295243	-4.45829
AKAP13_S1606	1.1524	0.0509138	6.05665	9e-08	3.74e-07	7.22953
AKAP13_S1910	1.61748	-0.0691176	6.44933	3.03e-08	1.34e-07	8.39251
AKAP13_S1933	1.33965	-0.108224	6.27892	3.77e-08	1.65e-07	8.08605
AKAP13_S2402	-0.868679	0.08306	-3.52084	0.000884548	0.00187894	-1.61179
AKAP13_S2502	1.39006	-0.0500435	5.54958	1.1e-06	3.85e-06	4.9439
AKAP13_S2567	1.77351	-0.098	6.63571	1.63e-08	7.53e-08	9.01645
AKAP13_S2703	0.862857	-0.191273	3.75405	0.000471279	0.00104888	-0.93179
AKAP13_S2713	2.38515	-0.226293	10.6325	1.37e-15	2.14e-14	25.0954
AKAP13_S2724	1.26425	0.0337143	5.79778	3.83e-07	1.44e-06	5.90996
AKAP13_S650	1.01281	0.119207	4.10533	0.00012039	0.000299275	0.21156
AKAP13_S790	1.19084	-0.0164211	5.66822	4.22e-07	1.58e-06	5.75907
AKAP13_S983	1.71272	-0.110314	8.74416	5.57e-12	4.4e-11	16.9244
AKAP13_T2415	2.14788	-0.207164	7.59158	2.73e-10	1.68e-09	13.0199
AKAP17A_Y629	1.08119	-0.493196	2.3962	0.0203612	0.0330709	-4.44554
AKAP5_S18	-2.24694	0.264419	-7.39722	2.09e-09	1.11e-08	11.205
AKAP6_S1067	-1.11912	0.0375345	-4.89436	7.4e-06	2.26e-05	2.91068
AKAP6_S1073	-1.97217	0.0663488	-10.004	3.29e-13	3.22e-12	19.8937
AKAP6_S1595	-1.23894	0.0175345	-6.01992	1.04e-07	4.29e-07	7.08871
AKAP6_S1644	-0.833945	-0.0683261	-5.25519	3.08e-06	1.01e-05	3.92974
AKAP6_S610	-2.12868	-0.0719423	-9.72816	1.27e-13	1.34e-12	20.6766
AKAP8_S112	0.56807	-0.0479167	3.3942	0.00132669	0.00272386	-1.93481
AKAP8_S328	0.81355	-0.113542	3.81443	0.000364939	0.000829802	-0.759314
AKAP9_S1327	0.836415	-0.176564	3.13307	0.00269614	0.00523986	-2.72474
AKAP9_S3576	-0.431128	0.108	-2.62705	0.0111453	0.0191422	-3.97235
AKR7A2_S255	-1.0105	0.0941897	-5.9147	1.56e-07	6.28e-07	6.68653
AKT1_S124	0.642764	-0.0600862	4.35871	5.03e-05	0.000133352	1.05173
AKT1_S129	0.336095	-0.0426531	2.30822	0.0249315	0.0397494	-4.68823
AKT1S1_S108	-1.47192	0.238707	-6.79416	4.93e-09	2.48e-08	10.0948
AKT1S1_S112	-0.776737	0.204618	-4.18933	9.51e-05	0.00024084	0.496269
AKT1S1_S203	3.1638	-0.479939	6.57989	2.17e-08	9.8e-08	8.83412
AKT1S1_S222	0.471145	0.0352586	2.76831	0.00742582	0.0132027	-3.67047
AKT1S1_S223	-0.80592	0.0769423	-2.62485	0.0111613	0.0191678	-3.97693
AKT1S1_S232	0.410946	0.0895682	2.32546	0.0243355	0.0388775	-4.59717
AKT3_S120	-1.74958	0.116	-7.11284	1.5e-09	8.2e-09	11.279
AKT3_S34	-2.22861	0.323067	-10.858	1.28e-14	1.61e-13	23.0711
AKT3_T447	-1.69202	-0.0170172	-8.03565	3.49e-11	2.44e-10	15.0007
ALAD_S244	-1.48043	0.141517	-7.69523	1.36e-10	8.73e-10	13.6523
ALB_S29	3.02991	-0.473434	7.64207	2.75e-10	1.69e-09	13.113
ALB_S294	0.861752	-0.130208	3.01625	0.00382297	0.00719479	-2.94383
ALB_S82	2.26151	-0.327862	5.91515	1.56e-07	6.27e-07	6.68825
ALB_S89	1.25206	-0.308588	6.01456	1.54e-07	6.19e-07	6.79101
ALB_T446	1.05263	-0.14154	4.8174	1.23e-05	3.62e-05	2.50736
ALB_T551	1.85859	-0.314483	6.60763	1.03e-08	4.94e-08	9.36443
ALB_T92	0.721613	-0.147479	3.13056	0.00286515	0.00553624	-2.65727
ALDH1A1_T337	-0.762618	0.228136	-2.7743	0.00786671	0.0139184	-3.57579
ALDH1L1_S641	-1.01992	0.0965581	-5.77639	5.92e-07	2.16e-06	5.62718
ALDOA_S100	-0.774099	0.215413	-4.07335	0.000165901	0.000402868	0.0573566
ALDOA_S186	-0.556477	0.00288462	-3.53168	0.000836276	0.00178597	-1.56747
ALDOA_S326	-2.91281	0.375273	-14.3128	8.01e-21	5.97e-19	37.1138
ALDOA_S330	-2.30703	0.228069	-10.4098	3.19e-15	4.56e-14	24.2523
ALDOA_S90	-2.80294	0.392224	-15.3953	7.92e-23	1.29e-20	41.6647
ALDOA_T63	-1.67539	0.152362	-12.6515	8.24e-19	2.98e-17	32.4747
ALDOA_T91	-3.16393	0.29769	-14.6197	9.82e-22	9.84e-20	39.1664
ALDOC_S132	-1.44594	0.160207	-8.51318	5.22e-12	4.15e-11	16.8889
ALDOC_S36	-4.21828	0.393948	-14.3177	2.67e-21	2.38e-19	38.1725
ALDOC_S45	-3.06527	0.293707	-12.6371	8.68e-19	3.11e-17	32.4237
ALG3_S13	0.841426	0.0366379	5.13335	3.06e-06	1e-05	3.77112
ALKBH5_S361	0.968984	0.100069	4.37881	4.69e-05	0.000124973	1.11953
ALKBH5_S371	1.74372	-0.0889592	4.29267	7.57e-05	0.000195301	0.854096
ALKBH5_S384	2.54749	-0.345946	9.07418	7.59e-13	6.96e-12	18.8885
ALKBH5_S64	-0.949837	0.26014	-4.43396	4.6e-05	0.00012268	1.27277
ALS2_S1335	-1.98379	0.257922	-11.3741	4.74e-16	8.07e-15	26.2683
ALS2_S361	-0.908598	0.204311	-3.46832	0.00110314	0.00230451	-1.74606
ALS2_S466	1.11404	-0.095913	4.15798	0.000126212	0.000312412	0.320589
ALS2_S492	-0.960901	-0.0379216	-3.70761	0.000489055	0.00108614	-1.05359
ALS2_T510	-1.42821	0.0986607	-7.26432	8.98e-10	5.08e-09	11.797
ALYREF_S101	1.16308	0.0266034	4.06885	0.000136231	0.000335496	0.0928969
AMER2_S229	1.54447	-0.309816	2.95969	0.00460156	0.00852117	-3.03994
AMER2_S233	2.09563	-0.512625	4.64962	1.88e-05	5.37e-05	2.05723
AMER2_S355	-1.43219	0.130379	-8.10983	2.6e-11	1.86e-10	15.2945
AMER2_S551	0.594238	-0.177638	2.25726	0.0275339	0.043548	-4.84794
AMOT_S714	-0.979385	0.24781	-4.96227	5.76e-06	1.8e-05	3.15343
AMOTL1_S809	0.823062	-0.0320435	4.31836	7.47e-05	0.000192826	0.826445
AMOTL1_S828	2.0278	-0.26519	9.56993	8.14e-14	8.83e-13	21.0272
AMOTL1_S906	-0.526934	0.133276	-2.45288	0.0170061	0.0281246	-4.42037
AMOTL1_S924	-1.72643	0.159017	-7.87254	6.69e-11	4.5e-10	14.3547
AMOTL2_S108	-0.712894	0.0169623	-3.69089	0.000502447	0.0011137	-1.08823
AMOTL2_S598	-1.15694	0.121362	-6.76735	5.49e-09	2.73e-08	9.98968
AMOTL2_S817	0.439371	-0.169638	2.22267	0.0307128	0.0479966	-4.81314
AMPD2_S100	1.68767	-0.073431	5.86509	1.89e-07	7.49e-07	6.4976
AMPD2_Y307	1.36221	-0.02636	5.28621	2.32e-06	7.76e-06	4.17849
AMPD3_S94	1.05463	0.0127586	5.9109	1.59e-07	6.37e-07	6.67204
AMPD3_T119	0.917771	-0.0324727	3.76119	0.000391601	0.000884842	-0.859367
AMPH_S250	-0.862875	0.213688	-4.81438	1.32e-05	3.88e-05	2.44751
AMPH_S262	-2.17245	0.284879	-11.4846	5.63e-17	1.22e-15	28.2706
AMPH_S272	-1.25134	-0.247708	-4.76243	1.58e-05	4.58e-05	2.32067
AMPH_S276	-3.46951	0.528086	-17.2167	2.85e-25	1.6e-22	47.2343
AMPH_S506	-0.66261	-0.054569	-2.7634	0.00752581	0.0133641	-3.68269
AMPH_S549	-3.83299	0.454439	-12.0908	7.99e-18	2.15e-16	30.2252
AMPH_T274	-3.17042	0.0734615	-10.3936	1.15e-14	1.47e-13	23.0669
AMPH_T310	0.924653	-0.178828	2.32906	0.0231385	0.0371457	-4.69446
ANAPC1_S1347	-0.338733	0.0497222	-2.63836	0.0106856	0.0184215	-3.98978
ANAPC1_S688	-0.452825	0.0415517	-3.55691	0.000726824	0.00156856	-1.50357
ANAPC1_S703	-0.71239	0.0586591	-3.6203	0.000708928	0.00153336	-1.32104
ANAPC1_S731	-1.33604	0.270052	-10.305	4.76e-15	6.55e-14	23.8534
ANAPC2_S314	-0.594274	-0.0279483	-3.43055	0.00107849	0.00225761	-1.87633
ANAPC2_S534	-0.367689	0.0668627	-2.57698	0.0126878	0.0215409	-4.08979
ANAPC4_S780	0.727289	-0.0897447	3.20828	0.00231295	0.00455097	-2.45284
ANK1_S814	2.33908	-0.223654	4.69484	1.77e-05	5.09e-05	2.13486
ANK1_S875	1.52127	-0.200121	3.83839	0.000293658	0.000681591	-0.642132
ANK1_S897	-0.60208	0.0119231	-3.99727	0.000189822	0.000456511	-0.153834
ANK2_S1203	-3.24629	0.407417	-23.3257	3.75e-29	4.67e-25	55.85
ANK2_S1243	-0.80463	0.0999565	-5.22574	3.42e-06	1.11e-05	3.82909
ANK2_S1459	-2.08574	0.332519	-10.6692	4.3e-15	5.99e-14	24.0421
ANK2_S1461	-2.11866	0.365431	-10.3782	3.6e-15	5.08e-14	24.1321
ANK2_S1500	-0.951422	-0.261121	-2.38103	0.0203582	0.033069	-4.58086
ANK2_S1596	-3.0629	0.235491	-14.6922	1.12e-21	1.11e-19	39.0449
ANK2_S1732	-4.14169	0.489263	-13.1621	1.86e-19	8.45e-18	33.9642
ANK2_S1733	-4.45297	0.445018	-11.8677	1.78e-17	4.34e-16	29.4279
ANK2_S1846	-1.27357	0.0362759	-7.37728	4.84e-10	2.85e-09	12.3935
ANK2_S1855	-4.43076	0.122552	-10.5781	1.68e-15	2.56e-14	24.8901
ANK2_S1858	-3.82581	0.272741	-9.79641	3.38e-14	3.9e-13	21.9034
ANK2_S1867	-4.30081	0.200075	-8.05274	5.73e-11	3.88e-10	14.5552
ANK2_S1879	-4.68725	0.130862	-9.80462	3.27e-14	3.79e-13	21.9351
ANK2_S1882	-3.58871	0.111603	-9.83467	2.91e-14	3.4e-13	22.0509
ANK2_S1891	-5.10053	0.123368	-8.91129	1.24e-12	1.09e-11	18.3286
ANK2_S1905	-2.27461	0.097569	-7.62694	1.78e-10	1.13e-09	13.3818
ANK2_S1917	-1.97215	-0.0433448	-6.7106	6.87e-09	3.38e-08	9.76726
ANK2_S1929	-2.85795	0.141966	-7.71484	1.26e-10	8.14e-10	13.73
ANK2_S1940	-1.72695	-0.0123103	-6.03964	9.62e-08	3.98e-07	7.16427
ANK2_S1964	-2.00814	-0.0435345	-7.30254	6.52e-10	3.77e-09	12.098
ANK2_S1976	-2.33624	0.119948	-7.19002	1.02e-09	5.72e-09	11.6535
ANK2_S2127	-4.9809	0.227	-10.5461	1.9e-15	2.87e-14	24.7691
ANK2_S2172	1.51754	-0.205462	3.02939	0.00370736	0.00699611	-2.91202
ANK2_S2226	-3.46934	0.649318	-11.3827	3.24e-15	4.63e-14	24.4455
ANK2_S2227	-5.58298	0.946646	-14.3702	1.02e-19	4.92e-18	34.6672
ANK2_S2243	-5.2461	0.573228	-19.7349	3.93e-28	1.37e-24	53.7329
ANK2_S2246	-4.94649	0.61832	-22.0327	1.31e-28	7.63e-25	54.8059
ANK2_S2250	-4.67244	0.460852	-12.3139	8.38e-18	2.25e-16	30.2111
ANK2_S2315	-4.38486	0.103422	-10.0926	1.54e-13	1.6e-12	20.571
ANK2_S2376	-2.64542	0.323887	-13.262	4.83e-19	1.91e-17	33.0727
ANK2_S2405	-2.49722	0.132526	-7.70464	1.44e-10	9.22e-10	13.6022
ANK2_S2440	-3.24543	0.315382	-9.47658	1.9e-13	1.94e-12	20.2405
ANK2_S2447	-3.4165	0.58175	-11.2797	4.46e-15	6.18e-14	24.1285
ANK2_S2458	-5.48406	0.825824	-15.0971	3.5e-21	2.96e-19	37.9785
ANK2_S2463	-4.91026	0.688038	-12.8652	1.77e-18	5.72e-17	31.7795
ANK2_S2537	-5.23543	0.320019	-9.04169	1.58e-12	1.37e-11	18.1638
ANK2_S2574	-2.77493	0.110347	-8.73175	7.93e-12	6.12e-11	16.6289
ANK2_S2624	-3.59172	0.39313	-14.3566	2.45e-19	1.05e-17	33.8223
ANK2_S2642	-3.25801	0.191207	-12.4732	1.55e-18	5.16e-17	31.8436
ANK2_S2664	-3.46911	0.468534	-18.6328	4.68e-27	8.2e-24	51.2904
ANK2_S2666	-3.89885	0.564259	-17.7986	5.13e-26	4.77e-23	48.9289
ANK2_S2701	-2.72836	0.355714	-12.3613	3.23e-17	7.35e-16	28.9447
ANK2_S2703	-3.69454	0.284638	-13.7999	1.53e-20	1.02e-18	36.4408
ANK2_S2704	-3.97981	0.493638	-13.8548	1.27e-20	8.63e-19	36.6262
ANK2_S2784	-3.21499	0.297116	-6.6444	2.88e-08	1.28e-07	8.60964
ANK2_S2795	-4.20471	0.143362	-7.64459	5.35e-10	3.13e-09	12.4325
ANK2_S2834	-2.1988	-0.0258276	-4.3644	4.93e-05	0.000130919	1.07091
ANK2_S31	-1.66787	0.124603	-5.80862	2.36e-07	9.18e-07	6.28304
ANK2_S3273	-3.46483	-0.0239655	-8.79123	1.73e-12	1.48e-11	17.9844
ANK2_S3713	-0.842327	0.127844	-2.78438	0.00760901	0.013494	-3.54946
ANK2_S3718	-0.433467	-0.0154444	-2.36517	0.0213969	0.0346175	-4.614
ANK2_S3765	1.68389	-0.0489474	7.38192	5.18e-10	3.04e-09	12.3707
ANK2_S3795	-0.907993	0.135569	-3.78097	0.000354323	0.000808087	-0.821198
ANK2_S3833	-2.68968	0.154241	-11.7572	2.07e-17	4.93e-16	29.2679
ANK2_S3840	-1.61856	0.163849	-6.70374	1e-08	4.81e-08	9.43302
ANK2_S3845	-0.652091	0.151207	-4.00258	0.000170285	0.0004126	-0.121048
ANK2_S3909	1.66137	-0.157655	6.56156	1.24e-08	5.86e-08	9.18453
ANK2_S621	-1.899	0.223682	-6.06634	2.01e-07	7.9e-07	6.63239
ANK2_S890	0.570181	-0.155517	2.29453	0.0251681	0.0401083	-4.76878
ANK2_S907	-0.606942	0.0440455	-2.53759	0.0144761	0.0242978	-4.1315
ANK2_T2132	-1.05359	-0.0529375	-2.64585	0.0107624	0.018543	-3.87772
ANK2_T2239	-2.74982	0.377818	-8.406	5.54e-11	3.77e-10	14.7921
ANK2_T2242	-3.84092	0.565078	-15.1765	2.77e-21	2.43e-19	38.2069
ANK2_T2451	-4.27801	0.272707	-10.3294	4.33e-15	6.03e-14	23.9466
ANK2_T2583	-2.9066	0.0473103	-7.04037	1.85e-09	9.96e-09	11.0631
ANK2_T3093	-0.759526	-0.0112241	-2.80885	0.00664614	0.0119272	-3.56892
ANK2_T3776	0.615786	-0.17814	2.82108	0.00645494	0.01162	-3.49254
ANK2_T3797	-3.04067	0.452828	-12.432	1.8e-18	5.79e-17	31.6972
ANK2_T3803	0.419907	-0.0813621	2.19519	0.0319129	0.0496806	-4.97735
ANK2_T855	-2.93546	0.205771	-7.66567	4.39e-10	2.61e-09	12.6537
ANK3_S1445	-4.03445	0.33006	-10.2121	3.35e-14	3.88e-13	22.0234
ANK3_S1984	-2.50845	0.242842	-12.3057	3.72e-18	1.09e-16	30.9871
ANK3_S2625	-3.30733	0.0617447	-8.87076	6.69e-12	5.23e-11	16.7888
ANK3_S2668	-1.24819	0.064717	-8.11237	4.56e-11	3.14e-10	14.8144
ANK3_S2672	-3.54987	0.380962	-13.9669	5.02e-20	2.78e-18	35.3188
ANK3_S3143	-2.7748	0.195778	-12.6586	2.6e-18	8.06e-17	31.377
ANK3_S3147	-3.9618	0.438517	-15.2886	1.11e-22	1.65e-20	41.3257
ANK3_S3207	-2.41967	-0.105271	-7.59191	5.75e-10	3.35e-09	12.3487
ANK3_S4229	-2.29739	0.1234	-7.50075	3.89e-10	2.33e-09	12.6689
ANK3_S4333	-3.08925	0.0432826	-7.15876	3.45e-09	1.77e-08	10.6326
ANK3_S623	-3.76601	0.386707	-13.7582	1.76e-20	1.15e-18	36.2999
ANKFN1_S113	-1.38113	0.0410435	-5.46563	1.47e-06	5.06e-06	4.6533
ANKFN1_S92	1.09995	-0.234397	4.24677	7.42e-05	0.000191513	0.67714
ANKIB1_S304	-0.347363	0.105983	-2.20659	0.0310656	0.0484958	-4.95381
ANKLE2_S662	-0.909712	0.146672	-6.44925	1.93e-08	8.82e-08	8.74693
ANKRD11_S812	0.859739	0.00497872	4.06879	0.000164884	0.000400626	0.057512
ANKRD13C_T413	-1.07771	0.24619	-6.57777	1.16e-08	5.52e-08	9.2478
ANKRD13D_S552	-3.73183	0.251914	-12.6673	7.8e-19	2.88e-17	32.5305
ANKRD13D_T556	-1.42232	0.194644	-6.13672	1.46e-07	5.88e-07	6.9395
ANKRD17_S1639	0.435034	0.0478621	2.65416	0.0100944	0.0175028	-3.95019
ANKRD17_S2044	-0.737811	0.017549	-4.45821	4.13e-05	0.000111242	1.32127
ANKRD17_S2401	0.377957	-0.0359138	2.38768	0.0200246	0.0325849	-4.56616
ANKRD24_S354	-2.48804	0.401679	-16.6014	1.83e-23	4.37e-21	43.1608
ANKRD27_S962	-1.008	0.0627451	-4.99843	6.26e-06	1.94e-05	3.15535
ANKRD28_S1044	0.737675	-0.0505472	2.56183	0.0130893	0.0221535	-4.12427
ANKRD34A_S461	-0.774136	0.0722115	-5.26837	2.29e-06	7.65e-06	4.13321
ANKRD34A_T292	-1.29268	0.189471	-6.19938	7.73e-08	3.23e-07	7.46954
ANKRD35_S762	-1.2334	0.138667	-5.27658	2.62e-06	8.68e-06	4.0295
ANKRD63_S193	-2.09726	0.122021	-8.59272	1.53e-11	1.14e-10	15.9876
ANKS1A_S647	-1.11329	0.118793	-4.89066	7.5e-06	2.29e-05	2.8975
ANKS1A_S663	0.8512	-0.0673276	6.67857	7.8e-09	3.8e-08	9.64186
ANKS1B_S310	-3.51585	0.325889	-11.4547	1.66e-16	3.16e-15	27.257
ANKS1B_S353	-4.01279	0.447849	-11.8092	6.27e-17	1.35e-15	28.2206
ANKS1B_S507	-2.11824	0.280944	-12.2138	1.18e-17	3.05e-16	29.8848
ANKS1B_S651	-3.53566	0.0993889	-9.24193	5.44e-13	5.14e-12	19.2058
ANKS1B_T969	-3.12801	0.292149	-11.0626	3.85e-15	5.4e-14	24.2344
ANKS6_S660	0.292204	-0.0911379	2.19422	0.0319859	0.0497788	-4.97935
ANLN_S642	-2.11638	0.00131818	-4.82419	1.47e-05	4.3e-05	2.41769
ANLN_S658	-2.76713	-0.135187	-5.36294	1.93e-06	6.52e-06	4.33014
ANLN_S661	-2.98175	-0.0356207	-7.37583	4.86e-10	2.87e-09	12.3878
ANLN_S664	-2.64466	0.04436	-6.25183	6.79e-08	2.86e-07	7.60628
ANLN_S792	-3.18096	0.617414	-8.88744	1.19e-12	1.05e-11	18.3625
ANO3_S97	-2.77519	0.374	-9.00302	7.51e-13	6.9e-12	18.816
ANO6_S277	1.42064	0.0917544	4.71323	1.46e-05	4.27e-05	2.29607
ANP32B_T15	1.24704	-0.0276909	6.68165	9.44e-09	4.54e-08	9.47552
ANP32B_T244	3.26543	-0.406276	13.3103	8.19e-20	4.17e-18	34.7709
ANXA1_S34	1.95909	-0.0516327	6.46173	3.35e-08	1.47e-07	8.40391
ANXA1_S37	0.807168	-0.0113684	2.95328	0.00446416	0.00829228	-3.15318
ANXA1_S45	0.374968	0.0756724	2.19696	0.0317801	0.0494959	-4.9737
ANXA2_S145	0.551877	0.0489	2.91158	0.00522263	0.00956055	-3.22218
ANXA2_S239	1.17242	0.138326	2.47516	0.0169932	0.0281077	-4.21136
ANXA2_S30	1.46467	0.0197241	5.64357	4.44e-07	1.66e-06	5.65958
ANXA2_T37	0.419204	0.0133878	2.45613	0.0173656	0.0286539	-4.3658
ANXA2_Y42	0.80527	0.0747586	3.23471	0.00195642	0.00390231	-2.43565
ANXA6_S151	-1.0647	0.145755	-6.24067	7.56e-08	3.17e-07	7.50783
AP1AR_S186	0.671275	-0.00772917	3.39278	0.00133231	0.00273412	-1.98968
AP1G1_S235	-3.54996	0.311091	-11.1282	7.15e-15	9.59e-14	23.6596
AP1S1_S147	-2.21614	0.231966	-14.3108	2.73e-21	2.41e-19	38.1495
AP2A1_S518	-2.15698	0.376276	-15.1012	2.04e-22	2.73e-20	40.7266
AP2A1_S637	-0.447873	-0.116477	-2.33088	0.0240226	0.0384164	-4.58567
AP2A1_S649	-0.493218	0.0989828	-2.39234	0.0197941	0.0322549	-4.55586
AP2A1_S655	-0.884286	0.163931	-6.78482	5.12e-09	2.56e-08	10.0582
AP2A1_T794	-3.86502	0.386926	-11.4707	1.57e-16	3.02e-15	27.2938
AP2M1_S70	-3.65186	0.328138	-15.0634	2.3e-22	3e-20	40.6052
AP2M1_T181	-0.763231	0.0995345	-6.81933	4.46e-09	2.25e-08	10.1936
AP3B1_T810	1.90812	-0.200957	6.74506	1.53e-08	7.09e-08	9.15937
AP3B2_S272	-2.34943	0.168138	-11.4857	5.61e-17	1.22e-15	28.2744
AP3B2_S752	-5.74782	0.722638	-12.903	3.39e-19	1.39e-17	33.358
AP3D1_S632	-4.59104	0.83586	-16.5031	3.85e-24	1.22e-21	44.6683
AP3D1_S658	0.97283	-0.0877931	3.98797	0.000178825	0.000432031	-0.167924
AP3D1_S764	-1.57656	0.253233	-4.81136	1.6e-05	4.63e-05	2.34607
AP3D1_S829	-0.681735	-0.0364583	-3.96475	0.000226132	0.00053585	-0.251225
AP3D1_T878	0.82291	-0.057549	5.15648	3.56e-06	1.15e-05	3.70725
AP5S1_S34	-0.537193	0.0418409	-2.58033	0.0129965	0.0220146	-4.03389
APBA1_S242	-0.875855	0.0102759	-5.73933	3.08e-07	1.18e-06	6.02064
APBA1_T305	-2.95594	0.553741	-12.5563	1.16e-18	3.98e-17	32.1384
APBA1_T370	-0.84244	-0.0628222	-3.40208	0.00134263	0.00275302	-1.93182
APBA1_Y264	-1.1042	-0.219528	-3.4993	0.000914172	0.0019362	-1.6559
APBA2_S208	-0.735047	-0.152472	-2.9023	0.00526324	0.00962682	-3.29242
APBB1_S205	0.866636	-0.0974423	3.35934	0.00141347	0.00288842	-2.06298
APBB1_S347	-2.03784	-0.0879273	-6.71316	8.36e-09	4.06e-08	9.59637
APBB1IP_S526	0.708776	-0.0192069	3.03476	0.00351865	0.00667468	-2.98248
APBB2_S331	-0.588068	0.0892667	-2.43295	0.0186853	0.030591	-4.36509
APBB2_S410	0.944566	-0.0742	4.22447	8.44e-05	0.000215724	0.611131
APC_S1060	0.631943	-0.131672	3.17479	0.00233806	0.0045952	-2.60218
APC_S1389	-1.28952	0.121914	-7.70393	1.31e-10	8.45e-10	13.6868
APC_S1407	0.701186	-0.0315283	4.42267	4.46e-05	0.000119256	1.23698
APC_S1792	-1.31655	0.0411897	-9.84311	2.82e-14	3.3e-13	22.0835
APC_S2106	1.58423	-0.27056	7.92395	1.34e-10	8.59e-10	13.8151
APC_S2278	-0.607537	-0.0734545	-3.06792	0.0035434	0.00671432	-2.83774
APC_S2288	-1.21282	-0.118685	-5.2167	2.56e-06	8.52e-06	3.96692
APC_S2308	1.86323	-0.159672	7.27728	7.21e-10	4.14e-09	11.9982
APC_S2368	1.22803	-0.0730909	3.89267	0.000255544	0.000599837	-0.45208
APC_S2742	2.25057	-0.276607	6.48331	1.91e-08	8.73e-08	8.85531
APC_S762	-0.760524	0.0481552	-3.72303	0.000427626	0.0009592	-1.00022
APC_S978	1.25894	-0.14919	5.83918	2.09e-07	8.22e-07	6.39909
APC_T1386	-1.3817	0.106034	-7.83499	7.78e-11	5.17e-10	14.2059
APC_T1456	-0.89585	0.125828	-6.19655	5.21e-08	2.23e-07	7.76779
APC_T2469	1.3392	-0.115828	5.46263	8.87e-07	3.16e-06	4.98266
APC_Y2535	-0.480054	0.0998723	-2.96968	0.00454064	0.00842088	-3.08141
APC2_S108	-3.27817	0.425896	-12.994	6.2e-18	1.71e-16	30.6036
APC2_S2009	0.568544	-0.115345	2.27467	0.0264056	0.0419156	-4.81111
APC2_S710	-1.00905	-0.0717647	-5.85568	2.77e-07	1.07e-06	6.211
APC2_S893	-0.88698	-0.119345	-3.47414	0.000942059	0.00199067	-1.74876
APC2_S996	-1.00108	0.0974828	-7.85399	7.21e-11	4.82e-10	14.2812
APC2_T1213	-1.23915	0.119914	-8.14505	2.26e-11	1.63e-10	15.4338
APEH_S187	-2.68073	0.349241	-15.7036	2.97e-23	6.47e-21	42.6364
API5_S464	0.797217	-0.122889	4.31425	6.33e-05	0.000165214	0.892881
APIP_S87	-1.37913	0.0877586	-5.95865	1.32e-07	5.36e-07	6.85431
APLNR_S347	-1.53726	0.218948	-5.16159	2.75e-06	9.09e-06	3.87389
APLNR_S348	-1.12144	0.184208	-2.78846	0.00719141	0.012816	-3.57935
APLP2_S590	-2.31753	0.34764	-11.5439	3.49e-16	6.22e-15	26.5837
APMAP_T19	1.05152	-0.0231765	5.1388	3.79e-06	1.22e-05	3.64521
APOB_S4048	1.21637	-0.0713091	4.43381	4.11e-05	0.000110647	1.30573
APP_S441	-1.70557	0.240862	-6.70037	7.15e-09	3.51e-08	9.72718
APP_T743	-0.900872	0.0329412	-3.98246	0.00020259	0.00048421	-0.211334
APPL1_S401	-0.263317	0.080431	-2.23073	0.0293362	0.0460726	-4.90363
APTX_S132	0.586451	-0.0803276	3.67697	0.000496022	0.00110044	-1.14126
AQP4_S285	1.64751	-0.10869	4.73889	1.3e-05	3.83e-05	2.36061
AQP4_S331	0.893111	-0.120741	2.86919	0.00573701	0.0104255	-3.421
AQP4_S340	2.91145	-0.532298	7.58294	2.33e-10	1.45e-09	13.1596
AQP4_T289	1.28459	-0.0819655	4.07039	0.00013552	0.000333933	0.0979193
ARAF_S189	0.553143	0.143509	3.06639	0.00323039	0.00617564	-2.85362
ARAF_S260	0.996002	0.0206724	4.32683	5.62e-05	0.00014803	0.944528
ARAF_S272	2.25173	-0.3275	7.20423	3.64e-09	1.87e-08	10.599
ARAF_T256	-0.569166	0.01366	-2.73511	0.0084257	0.0148068	-3.66144
ARAP1_S1419	0.697675	0.100521	3.17646	0.00251172	0.00490773	-2.58557
ARAP1_S630	-0.790685	0.184897	-5.19107	2.47e-06	8.21e-06	3.98142
ARAP3_S1337	2.70711	-0.0813654	8.12331	4.95e-11	3.39e-10	14.7438
ARAP3_S1444	2.24185	-0.0579138	5.86939	1.86e-07	7.38e-07	6.51395
ARFGAP1_S150	-0.683913	-0.0238824	-2.89855	0.00538057	0.00982595	-3.30573
ARFGAP1_S256	0.875544	-0.0469828	5.0771	3.77e-06	1.22e-05	3.56709
ARFGAP1_S351	-2.16366	0.284679	-8.06416	5.48e-11	3.73e-10	14.6318
ARFGAP1_S386	-1.25013	0.118341	-5.66161	8.29e-07	2.97e-06	5.2876
ARFGAP1_T189	-0.526914	0.134277	-2.83116	0.00662829	0.0119025	-3.43068
ARFGAP2_S146	-1.04049	0.176414	-6.92567	2.93e-09	1.52e-08	10.6115
ARFGAP2_S368	0.83439	-0.0658621	4.36771	4.88e-05	0.000129519	1.08208
ARFGAP2_S432	1.00376	-0.0443276	4.59075	2.22e-05	6.27e-05	1.84416
ARFGAP3_S231	1.32622	-0.187241	5.4481	9.37e-07	3.32e-06	4.92863
ARFGEF1_S1079	1.94745	-0.164125	7.40127	1.16e-09	6.42e-09	11.6955
ARFGEF1_S1555	0.513274	-0.136483	2.81663	0.00650523	0.0116996	-3.54928
ARFGEF1_S290	0.496189	-0.0240196	2.83048	0.00648383	0.0116647	-3.47747
ARFGEF1_S397	1.0177	-0.177302	3.97428	0.000242422	0.000571345	-0.231717
ARFGEF1_S52	-2.95573	0.356138	-16.6796	1.44e-24	5.7e-22	45.6344
ARFGEF1_S664	0.905127	-0.145288	5.00659	5.88e-06	1.83e-05	3.2584
ARFGEF1_T48	-2.12715	0.232978	-11.3065	2.3e-15	3.4e-14	24.7577
ARFGEF2_S1513	0.974149	-0.134279	5.04828	7.2e-06	2.21e-05	3.17818
ARFGEF2_S1782	-3.59037	0.336396	-10.346	3.29e-14	3.81e-13	22.0666
ARFGEF2_S218	-1.74895	0.137792	-9.58665	1.78e-13	1.82e-12	20.3296
ARFGEF2_S349	-1.00766	0.173586	-5.37298	1.25e-06	4.33e-06	4.65006
ARFGEF3_S1061	-2.77923	0.352956	-10.7599	1.75e-14	2.14e-13	22.7582
ARFGEF3_S1066	-2.51769	0.0628421	-9.3004	2.72e-13	2.7e-12	19.8373
ARFGEF3_S1651	-2.54415	0.0924314	-10.0365	5.06e-14	5.67e-13	21.6012
ARFGEF3_S1676	-2.3332	0.127069	-10.6883	1.11e-15	1.76e-14	25.3061
ARFGEF3_S1741	-2.85543	0.103431	-9.69238	5.05e-14	5.67e-13	21.5015
ARFGEF3_S2081	-0.736057	-0.136192	-2.6175	0.0113773	0.0195021	-3.99431
ARFIP1_S132	1.41316	-0.15417	5.45698	1.45e-06	4.98e-06	4.66468
ARFIP1_S39	1.71942	-0.251052	7.54125	2.51e-10	1.55e-09	13.0424
ARFIP2_S105	0.587287	0.0589636	2.84122	0.00616523	0.011141	-3.4906
ARGLU1_S58	1.03723	-0.0445	4.07565	0.000133133	0.000328517	0.11497
ARHGAP1_S35	-2.21693	0.254741	-12.0791	6.41e-18	1.77e-16	30.434
ARHGAP1_S49	-3.50098	0.415553	-16.7335	2.54e-22	3.26e-20	40.6021
ARHGAP1_S50	-0.97142	0.175207	-3.72073	0.000430817	0.000966234	-1.00729
ARHGAP1_S51	-1.67693	0.165724	-10.6115	1.48e-15	2.29e-14	25.0164
ARHGAP12_S103	2.59452	-0.390414	9.76943	3.75e-14	4.3e-13	21.7992
ARHGAP12_S176	1.08761	-0.207603	5.83499	2.13e-07	8.34e-07	6.38316
ARHGAP12_S201	0.985841	-0.21769	3.55184	0.000738545	0.00159129	-1.51871
ARHGAP12_S213	-0.828869	0.0385682	-5.13773	5.07e-06	1.6e-05	3.45866
ARHGAP12_S262	1.03055	-0.111586	4.54185	2.64e-05	7.36e-05	1.67545
ARHGAP12_T231	0.310955	-0.0167414	2.37921	0.0204503	0.0332001	-4.58488
ARHGAP15_S243	2.98951	-0.213825	9.43993	1.58e-13	1.64e-12	20.4044
ARHGAP15_S43	1.43495	-0.0150517	5.43865	9.71e-07	3.43e-06	4.89349
ARHGAP15_T213	1.89092	-0.163229	6.9863	5.28e-09	2.64e-08	10.149
ARHGAP17_S575	1.12764	-0.199448	6.69207	7.39e-09	3.62e-08	9.69468
ARHGAP17_S676	0.449553	-0.00498276	2.98265	0.00408522	0.0076364	-3.12077
ARHGAP17_S706	0.98425	-0.164566	4.85605	9.76e-06	2.93e-05	2.71069
ARHGAP20_S704	-0.984907	0.172034	-6.48273	1.69e-08	7.8e-08	8.87724
ARHGAP20_S828	-2.39967	0.262745	-15.1561	2.94e-21	2.55e-19	38.1478
ARHGAP21_S1099	-0.497374	-0.0358621	-2.44153	0.0175002	0.0288514	-4.44599
ARHGAP21_S1104	-0.794548	0.03858	-3.9207	0.000251657	0.000591668	-0.414139
ARHGAP21_S1115	-1.10909	0.115569	-9.36883	1.79e-13	1.83e-12	20.2456
ARHGAP21_S1433	0.342791	-0.0318448	2.35795	0.021554	0.0348426	-4.63158
ARHGAP21_S1742	0.645542	-0.00751724	3.2668	0.00177695	0.00356679	-2.34558
ARHGAP21_S253	-0.470524	0.0811552	-4.65116	1.79e-05	5.12e-05	2.05382
ARHGAP21_S319	-1.62721	0.180397	-10.8004	7.24e-16	1.19e-14	25.7278
ARHGAP21_S477	-1.00664	0.161434	-7.27045	1.14e-09	6.36e-09	11.6184
ARHGAP21_S671	0.502488	0.0762931	2.30926	0.0242835	0.038805	-4.73718
ARHGAP21_S857	1.00018	-0.224241	4.86137	8.34e-06	2.54e-05	2.79328
ARHGAP21_S881	1.13749	-0.104885	5.82005	3e-07	1.15e-06	6.12542
ARHGAP21_T1803	1.40816	-0.135654	4.89336	8.81e-06	2.67e-05	2.92154
ARHGAP21_Y756	0.437202	-0.0448621	2.64225	0.0104184	0.0180162	-3.97886
ARHGAP22_S375	-0.424337	0.0527255	-2.72599	0.00858944	0.0150743	-3.73516
ARHGAP23_S1412	1.04785	-0.143966	5.77922	2.64e-07	1.02e-06	6.17161
ARHGAP23_S361	-0.509348	-0.028	-3.84284	0.000300672	0.000696851	-0.652093
ARHGAP23_S372	-0.512869	-0.18583	-3.1565	0.00255448	0.00498568	-2.6216
ARHGAP23_S423	-0.558791	-0.154638	-2.27844	0.0261662	0.0415584	-4.80308
ARHGAP23_S554	-1.7064	-0.1605	-6.73422	9.63e-09	4.62e-08	9.51876
ARHGAP23_S586	-1.10174	0.0905102	-6.281	6.52e-08	2.76e-07	7.6543
ARHGAP23_S598	-1.32287	-0.00548276	-6.16486	5.9e-08	2.51e-07	7.64563
ARHGAP23_S611	-0.592453	0.0709804	-3.03487	0.00367531	0.00694013	-2.95287
ARHGAP23_S623	-1.67778	0.0991207	-10.5227	2.07e-15	3.1e-14	24.6805
ARHGAP23_S677	-1.23266	-0.0306034	-7.94631	4.99e-11	3.42e-10	14.6469
ARHGAP23_T1107	-0.617853	-0.00253448	-2.65792	0.00999406	0.0173409	-3.94112
ARHGAP24_S415	1.384	0.00701724	5.35168	1.35e-06	4.66e-06	4.57133
ARHGAP25_S380	0.554483	-0.130224	2.33628	0.0227329	0.0365258	-4.6788
ARHGAP25_S398	1.07142	0.0216981	3.80324	0.000351094	0.000801876	-0.746764
ARHGAP25_S495	1.86783	-0.16407	5.40586	1.14e-06	3.98e-06	4.78431
ARHGAP25_S508	0.847361	-0.0377931	5.22291	2.19e-06	7.35e-06	4.09783
ARHGAP27_S466	-0.493247	-0.00645833	-2.44486	0.0179266	0.0294735	-4.33836
ARHGAP29_S1019	0.646143	-0.0811207	2.78212	0.00715125	0.0127536	-3.63601
ARHGAP29_S499	0.698195	-0.0720345	2.67622	0.00951882	0.0165773	-3.89686
ARHGAP29_S949	0.994808	0.0452653	3.82002	0.000352873	0.000805088	-0.732443
ARHGAP30_S1086	0.518346	0.032617	2.6257	0.0113954	0.0195284	-3.97798
ARHGAP30_S630	0.82366	0.138212	2.58068	0.0125168	0.0212672	-4.0274
ARHGAP30_S709	0.968298	-0.00154546	3.79377	0.000352536	0.000804504	-0.759225
ARHGAP31_S1036	0.53	-0.0632	2.84162	0.00632618	0.0114023	-3.39876
ARHGAP31_S1178	-1.06024	0.0863673	-6.00838	1.77e-07	7.06e-07	6.71139
ARHGAP31_S272	1.92949	-0.209316	9.37539	2.03e-13	2.06e-12	20.1559
ARHGAP31_S346	0.921512	-0.0372586	6.38132	2.52e-08	1.13e-07	8.48292
ARHGAP31_S387	0.697274	-0.0703333	3.91314	0.000281935	0.000656217	-0.446
ARHGAP31_S476	-0.734878	0.149155	-4.17733	9.42e-05	0.000238836	0.447471
ARHGAP31_S954	1.6738	-0.148291	7.06668	2.11e-09	1.13e-08	10.9936
ARHGAP32_S1203	-1.79454	0.185444	-9.60966	1.37e-13	1.43e-12	20.5794
ARHGAP32_S1220	0.683914	-0.0916552	3.95287	0.000201075	0.000481051	-0.280195
ARHGAP32_S682	-1.17479	0.0661724	-7.44378	3.71e-10	2.23e-09	12.6566
ARHGAP32_S856	-1.12785	0.348553	-4.42947	5.04e-05	0.000133486	1.20186
ARHGAP32_S871	-1.87158	0.0194286	-7.01876	2.35e-09	1.24e-08	10.8421
ARHGAP32_S892	0.863436	-0.284255	3.67126	0.000548254	0.00120771	-1.16234
ARHGAP32_S952	-2.38651	0.207843	-12.8206	3.9e-18	1.14e-16	31.0212
ARHGAP32_T1236	-1.7774	0.217293	-9.51403	1.01e-13	1.08e-12	20.8103
ARHGAP33_S570	-2.70741	-0.225315	-7.32518	8.45e-10	4.8e-09	11.9095
ARHGAP33_S8	-1.21066	0.00665957	-6.85388	9.4e-09	4.52e-08	9.58829
ARHGAP33_S964	-0.664084	-0.0272586	-4.9537	5.95e-06	1.85e-05	3.12271
ARHGAP33_T762	-1.15035	0.202074	-5.34719	1.59e-06	5.43e-06	4.47833
ARHGAP35_S1174	-0.579208	0.138094	-3.64277	0.000584854	0.00128331	-1.23259
ARHGAP35_S1179	-0.871519	-0.00617241	-6.84457	4.04e-09	2.05e-08	10.2927
ARHGAP35_S970	-0.584864	-0.00277586	-3.35666	0.00135335	0.00277435	-2.09003
ARHGAP35_S975	-0.537982	0.0202759	-3.99607	0.000174039	0.000421081	-0.141937
ARHGAP35_S985	-0.367243	0.0989655	-2.69303	0.00910056	0.0159141	-3.85598
ARHGAP35_Y1087	-0.701286	0.0560889	-3.2187	0.00228999	0.0045128	-2.43433
ARHGAP35_Y1105	-1.08502	0.0720545	-5.00094	5.46e-06	1.72e-05	3.2658
ARHGAP39_S173	-2.79468	0.34031	-17.5411	1.09e-25	7.34e-23	48.184
ARHGAP39_S248	-0.582244	-0.180358	-3.45487	0.00104778	0.00219755	-1.78478
ARHGAP39_S286	-0.842	0.0997857	-5.98261	1.32e-07	5.38e-07	6.90269
ARHGAP39_S299	-2.62366	0.186731	-10.4492	9.41e-15	1.23e-13	23.2643
ARHGAP39_S366	-0.772497	0.157707	-4.14561	0.000104971	0.000263919	0.343236
ARHGAP39_S384	-1.65715	0.00802174	-7.22913	2.68e-09	1.4e-08	10.8832
ARHGAP39_S407	-1.5897	0.134039	-9.50889	3.38e-13	3.31e-12	19.7113
ARHGAP39_S432	-0.880018	0.0237586	-4.81935	9.72e-06	2.92e-05	2.64427
ARHGAP39_S488	-1.82777	-0.0255532	-5.72963	5.47e-07	2.01e-06	5.61879
ARHGAP39_S604	-1.15944	0.0948077	-6.9725	3.9e-09	1.99e-08	10.4136
ARHGAP39_S690	-2.23724	-0.185926	-5.45943	1.05e-06	3.68e-06	4.88537
ARHGAP4_S900	0.686775	0.230187	3.1271	0.00289356	0.00558495	-2.71785
ARHGAP4_S946	1.79071	-0.0922456	6.52792	1.51e-08	7.01e-08	9.03816
ARHGAP42_S734	2.20312	-0.635232	5.43096	1.08e-06	3.78e-06	4.84601
ARHGAP44_S596	-2.06618	0.0198	-5.14768	3.81e-06	1.23e-05	3.69349
ARHGAP44_S629	-2.2565	0.157286	-8.59626	1.3e-11	9.75e-11	16.1075
ARHGAP44_S802	-1.36864	-0.0674792	-2.35311	0.0224467	0.0361415	-4.53908
ARHGAP45_S594	2.00945	-0.131138	7.57612	2.19e-10	1.36e-09	13.1805
ARHGAP45_S598	1.8631	-0.121311	4.95931	8.95e-06	2.71e-05	2.94996
ARHGAP45_S635	1.08324	-0.0168182	4.52904	2.95e-05	8.14e-05	1.62724
ARHGAP45_S89	0.590812	0.0186897	2.81214	0.00658627	0.0118344	-3.56063
ARHGAP5_S1124	0.389311	0.00134483	2.30808	0.0243536	0.0388993	-4.73973
ARHGAP5_S1176	-0.704598	-0.033463	-3.27498	0.00178781	0.00358735	-2.2914
ARHGAP5_S1202	-0.971653	0.00512069	-6.09247	7.83e-08	3.27e-07	7.36704
ARHGAP5_S1218	1.39669	-0.390707	6.05003	9.23e-08	3.83e-07	7.20414
ARHGAP5_S590	0.789639	0.0227759	3.18979	0.00223646	0.00441493	-2.56071
ARHGAP5_S765	-1.63993	0.156983	-11.9885	8.9e-18	2.37e-16	30.1069
ARHGAP6_S754	-0.804933	0.0526744	-3.84827	0.000358992	0.000817345	-0.665422
ARHGAP6_S873	1.66329	-0.131023	4.73053	2.02e-05	5.73e-05	2.16585
ARHGAP6_S931	-0.939157	0.0454118	-4.03047	0.000173171	0.000419126	-0.0607837
ARHGAP6_T821	0.634567	-0.138345	2.67969	0.00943102	0.0164343	-3.88843
ARHGAP9_S546	1.07088	0.0183793	4.82195	9.63e-06	2.9e-05	2.65348
ARHGAP9_S571	2.00923	-0.158328	7.18036	1.06e-09	5.93e-09	11.6153
ARHGDIA_S34	0.830213	-0.0527241	3.19249	0.00221864	0.00438172	-2.55323
ARHGDIA_Y133	-1.83501	0.185845	-9.36451	1.82e-13	1.85e-12	20.2288
ARHGEF1_S791	-0.559937	0.0781724	-2.68529	0.00929097	0.0162145	-3.87482
ARHGEF10_S1231	0.552011	0.109466	2.58043	0.012256	0.0208608	-4.12589
ARHGEF10_S379	-0.422705	0.0557759	-2.67674	0.00950581	0.0165563	-3.89561
ARHGEF10_S59	0.559299	-0.0691552	3.11149	0.00281631	0.00545275	-2.77563
ARHGEF11_S1195	0.568857	-0.158414	3.17855	0.00231221	0.00455053	-2.5918
ARHGEF11_S1335	1.19505	-0.0754894	7.14729	3.24e-09	1.68e-08	10.6444
ARHGEF11_S1498	-0.712628	0.123397	-4.15321	0.000102283	0.000257644	0.368168
ARHGEF11_S150	-0.851761	0.0550566	-5.51681	8.83e-07	3.14e-06	5.05937
ARHGEF11_S1520	-1.73056	0.2	-11.2409	9.67e-16	1.56e-14	25.5715
ARHGEF11_S585	0.797179	0.01686	3.59617	0.000701589	0.00151842	-1.34099
ARHGEF11_S596	1.12062	0.0250877	5.63174	4.84e-07	1.8e-06	5.62265
ARHGEF11_T294	0.575474	-0.135109	2.7441	0.00841221	0.0147846	-3.69689
ARHGEF11_T708	-1.27557	0.129138	-10.1344	9.15e-15	1.2e-13	23.2023
ARHGEF12_S1389	-0.558682	0.0652692	-3.78699	0.000374997	0.000849788	-0.805098
ARHGEF12_S309	-1.20948	0.154534	-6.88925	3.38e-09	1.74e-08	10.4683
ARHGEF12_S337	-0.758932	0.0525	-4.57849	2.32e-05	6.53e-05	1.80181
ARHGEF12_S608	1.09874	-0.187842	3.54286	0.000766969	0.00164806	-1.50512
ARHGEF16_S230	-0.489016	0.0300556	-2.99129	0.00407763	0.00762386	-3.05994
ARHGEF17_S142	-0.562599	0.0900345	-3.54616	0.00075187	0.00161801	-1.53563
ARHGEF17_S1716	0.807902	-0.111017	3.87902	0.000256882	0.000602572	-0.514389
ARHGEF17_S1717	0.366002	0.068431	2.45011	0.0171255	0.028306	-4.42663
ARHGEF17_S395	1.04018	-0.158897	4.69544	1.52e-05	4.43e-05	2.20833
ARHGEF17_S527	0.567918	-0.0972069	2.57019	0.0125873	0.0213807	-4.14997
ARHGEF17_S546	1.99285	-0.261	7.29248	1.27e-09	7.03e-09	11.5321
ARHGEF17_S619	0.870837	-0.20007	5.19247	4.41e-06	1.41e-05	3.60405
ARHGEF17_S735	0.6292	-0.0828793	4.04648	0.000146916	0.000359828	0.0204553
ARHGEF17_S764	1.38213	-0.205448	7.21503	9.24e-10	5.22e-09	11.7522
ARHGEF17_S930	1.65544	-0.247235	5.9304	2.1e-07	8.25e-07	6.48336
ARHGEF17_S940	1.04421	-0.149959	2.86723	0.00593541	0.010767	-3.33655
ARHGEF17_S961	1.27555	-0.332673	3.02487	0.00383526	0.00721554	-2.93269
ARHGEF17_T170	-0.448218	0.091	-3.66026	0.000523317	0.00115614	-1.19214
ARHGEF17_T1991	0.523712	0.0582241	2.50523	0.0148857	0.0249134	-4.30099
ARHGEF18_S1124	1.51304	-0.0240702	7.19837	1.07e-09	5.98e-09	11.6511
ARHGEF2_S122	-0.446676	-0.0966136	-2.33999	0.0235048	0.0376777	-4.56629
ARHGEF2_S151	0.880718	0.00128889	2.25563	0.0286086	0.0450761	-4.68223
ARHGEF2_S163	-2.36461	0.113686	-9.97187	6.38e-14	7.05e-13	21.3712
ARHGEF2_S172	-0.574302	0.115259	-2.86116	0.00575129	0.0104471	-3.4362
ARHGEF2_S177	-1.00791	0.148792	-3.79122	0.000392642	0.000886893	-0.779154
ARHGEF2_S696	-0.710565	0.109362	-4.36436	4.93e-05	0.000130919	1.07077
ARHGEF2_S932	-0.414664	-0.0802545	-2.3518	0.02205	0.0355455	-4.64364
ARHGEF2_S941	-0.768249	0.0395172	-3.19155	0.00222484	0.00439297	-2.55584
ARHGEF2_S953	-3.33038	0.350365	-11.494	2.42e-16	4.46e-15	26.9059
ARHGEF2_S956	-1.8813	0.236293	-11.4612	6.14e-17	1.32e-15	28.1845
ARHGEF25_S595	-2.55706	0.272948	-10.3549	3.93e-15	5.5e-14	24.0434
ARHGEF25_T604	-1.92198	0.207543	-6.6501	2.15e-08	9.74e-08	8.86881
ARHGEF26_S222	2.52549	-0.285442	5.8607	4.42e-07	1.65e-06	6.0442
ARHGEF26_S80	0.838839	-0.0241034	4.29599	6.26e-05	0.000163533	0.841223
ARHGEF26_T370	1.51295	-0.141259	5.64631	4.4e-07	1.64e-06	5.66986
ARHGEF40_T1492	-0.542654	-0.000156863	-3.4623	0.00104574	0.00219353	-1.77461
ARHGEF6_S124	0.420841	0.107983	2.32531	0.0233517	0.0374568	-4.70258
ARHGEF6_S488	-1.82556	0.228828	-11.6897	2.65e-17	6.15e-16	29.0219
ARHGEF6_S640	1.48267	-0.120069	7.69164	1.38e-10	8.84e-10	13.6381
ARHGEF6_S684	1.01131	-0.0403966	5.53787	6.66e-07	2.42e-06	5.26324
ARHGEF7_S132	-0.640537	-0.0138103	-3.80481	0.000327801	0.00075337	-0.747045
ARHGEF7_S673	0.621583	-0.0137586	4.46423	3.47e-05	9.49e-05	1.4095
ARHGEF7_S776	1.49174	-0.0975172	9.69677	4.97e-14	5.6e-13	21.5184
ARID1A_S1184	1.29936	-0.197379	5.93155	1.46e-07	5.91e-07	6.75082
ARID1A_S1604	1.5184	-0.175103	9.38283	1.69e-13	1.74e-12	20.3001
ARID1A_S1755	0.683447	-0.0178276	3.76048	0.000378758	0.000857977	-0.884721
ARID1A_S363	1.17483	-0.179362	7.12744	1.31e-09	7.23e-09	11.4065
ARID1A_S382	0.625744	-0.172466	3.85949	0.000273971	0.000639731	-0.575897
ARID1A_S696	0.523104	-0.0248448	3.02893	0.00357817	0.0067721	-2.99804
ARID1A_S772	-0.591031	-0.0664318	-3.5341	0.000919022	0.00194553	-1.56768
ARID1B_S1763	-0.591222	-0.027463	-2.20795	0.0312268	0.0487257	-4.94778
ARID3A_S77	-0.607743	0.168326	-2.86767	0.00604602	0.0109494	-3.3932
ARID4A_S1109	-0.558872	-0.0272642	-4.21574	9.02e-05	0.000229419	0.556644
ARID4B_S1153	-0.833481	0.1636	-5.67485	7.46e-07	2.69e-06	5.3313
ARID4B_S666	0.79607	-0.0428039	3.50865	0.00090772	0.0019237	-1.64075
ARID5B_S264	0.539427	-0.0893137	2.9305	0.00492512	0.00905739	-3.22407
ARID5B_T539	-0.681444	0.036463	-5.61244	5.92e-07	2.16e-06	5.40373
ARL3_T46	-1.50933	0.11526	-8.32051	3.08e-11	2.17e-10	15.2717
ARL6IP4_S221	1.76643	-0.196509	6.97157	3.06e-09	1.59e-08	10.6272
ARL6IP4_S239	-1.36548	0.235319	-8.71017	1.18e-11	8.93e-11	16.2246
ARL6IP4_S332	1.19217	-0.043383	6.81501	1.08e-08	5.17e-08	9.48918
ARMC10_S45	-0.613898	0.114673	-3.40482	0.00123231	0.0025481	-1.93378
ARMCX1_T45	-0.671417	0.148114	-3.31254	0.00176619	0.00354725	-2.1853
ARMCX3_S110	0.562651	0.0363922	3.0744	0.00328459	0.00626888	-2.84838
ARMCX3_S61	-0.932023	0.135379	-6.87495	3.58e-09	1.83e-08	10.4121
ARMCX3_S67	-2.55052	0.340438	-9.03535	3.15e-12	2.59e-11	17.5264
ARMCX3_S72	0.67302	0.157586	3.62804	0.000580074	0.0012733	-1.28987
ARNT_S77	1.18298	-0.15993	5.67962	4.04e-07	1.51e-06	5.80174
ARPC5L_S64	-4.39845	0.51018	-14.6482	1.99e-20	1.27e-18	36.2645
ARPP19_S123	2.16337	-0.298552	6.66432	8.25e-09	4.01e-08	9.58608
ARPP21_S33	-0.933722	-0.23907	-2.24566	0.02837	0.0447237	-4.8717
ARPP21_S330	-0.866166	-0.01976	-3.58085	0.000735575	0.00158588	-1.38586
ARPP21_S349	-0.733027	-0.0269483	-3.47475	0.000940275	0.00198738	-1.74697
ARPP21_S376	-0.9329	-0.193585	-3.04405	0.00353223	0.00669461	-2.92334
ARRB1_S412	-1.02178	-0.143672	-3.80433	0.000328319	0.000754407	-0.748551
ARVCF_S343	0.533562	0.00887931	2.50875	0.0147521	0.024723	-4.29289
ASAP1_S1041	0.56207	-0.0332586	3.77887	0.000356759	0.000813004	-0.827726
ASAP1_S717	-1.42174	-0.17314	-3.26649	0.00179159	0.0035937	-2.34982
ASAP1_S839	-0.647129	0.0216207	-4.84536	8.85e-06	2.68e-05	2.73645
ASAP1_S843	-0.474429	0.131061	-2.57713	0.0127908	0.021701	-4.0377
ASAP1_S910	2.15057	-0.261902	7.8985	1.3e-10	8.4e-10	13.7931
ASAP2_S701	-1.10837	0.258172	-6.26135	4.04e-08	1.76e-07	8.01807
ASAP2_S822	-0.958519	0.103328	-7.53913	2.53e-10	1.57e-09	13.034
ASAP3_S291	1.82065	-0.306422	5.70095	6.8e-07	2.47e-06	5.42159
ASAP3_S862	2.85186	-0.313649	13.022	3.02e-19	1.26e-17	33.4953
ASB3_S35	1.21641	-0.0982128	4.96653	8.08e-06	2.46e-05	3.03575
ASCC2_S713	0.847625	-0.112074	2.93013	0.00484313	0.00892395	-3.21901
ASF1A_S166	1.08514	-0.217914	4.75053	1.25e-05	3.68e-05	2.40151
ASF1A_S175	0.668664	-0.12652	2.82482	0.00662155	0.0118929	-3.44069
ASH1L_S1748	-0.792803	0.0495517	-5.12161	3.2e-06	1.04e-05	3.72847
ASIC4_S155	-0.996351	0.0511591	-4.01927	0.000205835	0.000491092	-0.137896
ASMTL_S239	0.54176	-0.162862	2.45007	0.0171274	0.0283065	-4.42673
ASPM_S577	0.834071	-0.259244	2.94452	0.00494121	0.00908164	-3.1513
ASS1_T174	-1.36434	0.120283	-6.1727	1.19e-07	4.89e-07	7.17749
ASTN1_S194	-1.17579	0.155328	-6.90673	3.15e-09	1.63e-08	10.537
ASTN1_S376	-1.59408	0.0025	-7.5959	7.19e-10	4.13e-09	12.187
ASTN1_S379	-0.677694	-0.0754651	-2.66464	0.0105378	0.0181991	-3.77865
ASTN1_S898	-2.65985	0.232552	-9.59634	7.34e-14	8.04e-13	21.1296
ASTN2_T249	-0.916288	-0.0607674	-3.80384	0.000411771	0.000926259	-0.739198
ASXL2_S834	-0.647081	0.179674	-4.52178	3.8e-05	0.00010317	1.48026
ATAD1_S322	0.833003	0.00796491	3.6397	0.000564717	0.00124115	-1.21513
ATAD2_S1302	0.645333	0.0938621	3.33039	0.00146616	0.00298689	-2.16525
ATAD2_S327	0.733707	-0.22081	2.75443	0.00771151	0.0136591	-3.70497
ATAD2_T1152	1.37506	-0.0816842	5.08321	3.8e-06	1.22e-05	3.60813
ATAD3A_S369	-2.24118	0.210478	-10.9894	6.39e-15	8.64e-14	23.7636
ATAT1_T249	-0.460467	-0.0067931	-3.01238	0.00375234	0.00707185	-3.04209
ATF2_S90	1.95914	-0.41131	7.07272	1.63e-09	8.82e-09	11.1906
ATF3_T162	1.16523	-0.200382	4.52599	2.98e-05	8.22e-05	1.61689
ATF7_S241	0.595435	-0.082	2.91834	0.00497785	0.0091435	-3.2936
ATF7_S423	0.706494	-0.00107843	3.16515	0.00252989	0.00494046	-2.60494
ATF7_S97	0.555484	0.0173333	3.51199	0.000930887	0.00196945	-1.6
ATF7IP_S121	1.4564	-0.391707	4.93668	6.33e-06	1.96e-05	3.06177
ATF7IP_S453	0.921267	-0.174792	5.63956	5.6e-07	2.05e-06	5.50632
ATF7IP_S504	1.05949	-0.19869	8.54136	4.67e-12	3.74e-11	17.0001
ATF7IP_S567	1.09873	-0.180113	4.74746	1.44e-05	4.19e-05	2.33576
ATF7IP_S65	1.4398	-0.197397	10.8486	6.04e-16	1.01e-14	25.9088
ATF7IP_S681	0.901576	-0.123879	5.74823	2.97e-07	1.14e-06	6.05431
ATF7IP_S860	-0.84544	0.124047	-6.41511	6.41e-08	2.71e-07	7.77121
ATG13_S394	-0.565707	0.0387414	-4.13195	0.000109973	0.00027558	0.2985
ATG2A_S1630	-1.00741	0.181963	-4.53834	2.92e-05	8.07e-05	1.64173
ATG2A_S403	1.59055	-0.130807	4.95433	6.1e-06	1.9e-05	3.14627
ATG2B_S1016	-0.666951	-0.0265185	-4.11865	0.000122752	0.000304669	0.255171
ATG2B_S1579	-1.69523	0.131155	-8.67102	2.79e-12	2.31e-11	17.5113
ATG2B_S1743	-1.75159	0.221207	-11.8451	1.5e-17	3.72e-16	29.5877
ATG2B_S236	-2.00818	0.21538	-7.36485	1.07e-09	5.98e-09	11.7119
ATG2B_S240	-2.55372	0.319328	-14.6809	8.03e-22	8.33e-20	39.3665
ATG2B_S735	-2.33454	0.360717	-12.8112	2.18e-17	5.16e-16	29.3824
ATG2B_S840	-0.73893	0.158688	-4.94317	8.45e-06	2.57e-05	2.93053
ATG9A_S14	0.863093	-0.0465957	4.0969	0.000150548	0.000367742	0.144988
ATG9A_S16	-1.36207	0.078087	-6.38984	5.47e-08	2.34e-07	7.94541
ATG9A_S18	-1.59477	0.140138	-10.9424	4.24e-16	7.4e-15	26.26
ATG9A_S656	-0.873497	0.0513793	-6.51024	1.52e-08	7.05e-08	8.9844
ATG9A_S828	-0.41232	0.0413276	-3.42842	0.00108558	0.00227165	-1.88251
ATL1_S10	0.861307	-0.203827	3.78269	0.00038018	0.000860861	-0.818191
ATL1_S23	-1.41278	-0.005	-7.01347	2.06e-09	1.1e-08	10.9571
ATL2_S24	-1.13605	0.187897	-6.63741	9.18e-09	4.43e-08	9.48082
ATL3_S535	0.929952	0.0709828	4.70133	1.49e-05	4.34e-05	2.22893
ATN1_S101	-0.670626	0.238103	-3.61525	0.000604196	0.00132307	-1.32851
ATN1_S645	1.06468	-0.0614138	7.46416	3.42e-10	2.07e-09	12.7373
ATN1_S739	0.332973	0.0156379	2.19744	0.0317441	0.0494488	-4.97271
ATN1_S746	-1.46379	0.238911	-7.53176	1.02e-09	5.72e-09	11.8508
ATN1_S77	0.655203	-0.149321	4.27852	7.29e-05	0.000188589	0.761287
ATN1_T630	-0.946938	-0.00469565	-5.46529	1.48e-06	5.07e-06	4.65212
ATOX1_S47	-0.41834	0.114509	-2.58548	0.0122218	0.0208146	-4.06819
ATP11A_S740	1.70016	-0.238529	6.8596	6.49e-09	3.21e-08	9.91692
ATP11C_S1108	1.35534	-0.00408621	5.91564	1.56e-07	6.26e-07	6.69014
ATP11C_S445	1.08855	0.039449	4.52442	3.47e-05	9.47e-05	1.50287
ATP13A1_S899	0.953873	-0.0295862	4.10924	0.000118801	0.000296001	0.224321
ATP13A3_S98	-1.44977	0.138862	-8.77667	1.84e-12	1.57e-11	17.9271
ATP1A1_S16	-0.760261	0.0773704	-3.31126	0.00160406	0.00324404	-2.18964
ATP1A1_S228	-2.50712	0.333138	-11.595	3.75e-17	8.42e-16	28.6756
ATP1A1_S40	-5.19805	0.349873	-9.71658	7.68e-14	8.36e-13	21.1153
ATP1A1_S407	-3.33813	0.491218	-16.4752	1.04e-23	2.74e-21	43.7059
ATP1A1_S452	-4.94244	0.68398	-22.4422	5.36e-29	4.67e-25	55.6774
ATP1A1_S47	-3.48428	0.275052	-15.4182	7.36e-23	1.22e-20	41.7375
ATP1A1_S484	-4.03768	0.430414	-15.7277	2.75e-23	6.23e-21	42.7118
ATP1A1_S499	-3.33105	0.357724	-17.7652	5.66e-26	4.93e-23	48.8327
ATP1A1_S675	-3.7067	0.54598	-13.1718	2.53e-18	7.87e-17	31.4758
ATP1A1_Y260	-1.0437	0.0890345	-3.24734	0.00188387	0.00376796	-2.40029
ATP1A1_Y684	-3.27385	0.181404	-11.0008	4.72e-15	6.49e-14	24.0133
ATP1A2_S496	-3.13428	0.263825	-8.22755	1.82e-11	1.33e-10	15.6561
ATP1A2_S516	-2.78587	0.374882	-8.96988	2.42e-12	2.03e-11	17.7523
ATP1A3_S210	-4.40104	0.353018	-10.8456	1.17e-15	1.85e-14	25.2848
ATP1A3_S231	-4.63465	0.0771667	-11.1948	1.91e-15	2.89e-14	24.8995
ATP1A3_Y58	-0.719034	0.107962	-2.37071	0.0212311	0.0343685	-4.55493
ATP2B1_S1127	-0.834875	0.113897	-4.15771	0.000100722	0.000254043	0.382953
ATP2B1_S1140	0.537093	0.0588621	2.42541	0.0182243	0.0299122	-4.4822
ATP2B1_S1155	2.24227	-0.0192241	8.8501	1.37e-12	1.2e-11	18.2158
ATP2B1_S1178	-0.728626	0.0591034	-4.22454	8.01e-05	0.000205531	0.603392
ATP2B1_S1182	-1.07051	0.262603	-5.59251	5.4e-07	1.99e-06	5.46783
ATP2B1_S1211	-0.948084	-0.0171897	-4.77973	1.12e-05	3.34e-05	2.50433
ATP2B1_T1165	0.767133	0.0348	3.94953	0.000211992	0.0005044	-0.273367
ATP2B2_S1163	-0.818806	-0.185298	-2.83676	0.00618197	0.0111678	-3.49949
ATP2B2_S1201	-4.34994	0.185895	-10.1109	1.2e-14	1.53e-13	22.9404
ATP2B2_S1234	-0.948084	-0.0171897	-4.77973	1.12e-05	3.34e-05	2.50433
ATP2B2_S63	-3.14527	0.496722	-14.6359	4.2e-21	3.47e-19	37.7652
ATP2B4_S1117	0.706241	-0.133667	2.23241	0.0296914	0.0465591	-4.84863
ATP2B4_S328	-1.80028	0.125741	-11.3549	9.1e-17	1.85e-15	27.7926
ATP2B4_T1145	2.33758	-0.559098	5.83929	2.95e-07	1.13e-06	6.15137
ATP5F1B_S415	-2.56909	0.383759	-15.9989	6.65e-23	1.13e-20	41.8757
ATP5F1C_S146	-1.04664	0.253328	-6.82788	4.31e-09	2.18e-08	10.2272
ATP5IF1_S39	-4.29795	0.551	-15.3475	6.76e-20	3.55e-18	35.1218
ATP6AP1_T319	-4.07068	0.64325	-10.0391	9.41e-14	1.01e-12	21.0467
ATP6V0A1_T367	-2.74264	0.364191	-12.1105	1.34e-16	2.61e-15	27.5554
ATP6V0D1_S283	-2.41047	0.359389	-15.1366	8.92e-22	9.04e-20	39.3026
ATP6V0D1_S63	-1.31386	0.172848	-7.09284	4.37e-09	2.21e-08	10.4429
ATP6V1H_S351	-1.90194	0.12417	-5.73345	5.4e-07	1.99e-06	5.58764
ATP6V1H_S483	-3.3367	0.0134528	-9.95289	4.61e-14	5.22e-13	21.6713
ATP7A_S357	-0.912132	0.0385172	-5.98962	1.17e-07	4.79e-07	6.9727
ATP7A_S427	-1.75694	0.229912	-9.1053	5.8e-13	5.45e-12	19.0822
ATP8A1_S25	-2.29706	-0.0796078	-4.45547	4.17e-05	0.000112098	1.3122
ATP8A1_S29	-3.82849	0.36981	-12.6805	7.44e-19	2.76e-17	32.577
ATP8A1_S443	-3.70913	0.430983	-8.29315	1.25e-11	9.45e-11	16.0197
ATP8A1_T28	-3.63237	0.455828	-10.605	1.52e-15	2.33e-14	24.9915
ATP8A2_S46	-2.68792	0.123588	-6.49046	2.6e-08	1.16e-07	8.54486
ATP8A2_S475	-1.26153	0.236448	-8.20846	1.75e-11	1.29e-10	15.6848
ATRX_S1061	0.660375	-0.145055	3.0106	0.00383696	0.00721722	-3.00689
ATRX_S1073	0.47	0.0324444	2.19684	0.0320526	0.0498625	-4.97064
ATRX_S1322	-0.546712	0.065907	-3.36584	0.00153152	0.00310925	-1.98687
ATRX_S1348	-1.37397	0.275121	-5.85619	1.96e-07	7.72e-07	6.46372
ATRX_S594	0.661685	0.000565217	3.43819	0.00119138	0.00247138	-1.82388
ATRX_S675	-1.73963	0.534273	-5.01275	7.77e-06	2.37e-05	3.04129
ATRX_S704	1.45704	-0.163828	7.67106	1.5e-10	9.56e-10	13.5566
ATRX_S84	1.68116	-0.152155	6.36553	2.68e-08	1.2e-07	8.42164
ATRX_S849	0.62532	-0.105379	3.27181	0.00175036	0.00351829	-2.33145
ATRX_S92	0.85627	-0.138155	5.54153	6.57e-07	2.39e-06	5.27693
ATRX_S974	0.985043	-0.162586	5.6435	4.45e-07	1.66e-06	5.65929
ATRX_S978	-0.958524	0.180879	-4.60785	2.09e-05	5.92e-05	1.90339
ATRX_T662	-1.06145	0.0293265	-4.04893	0.000169075	0.000410123	0.022566
ATXN1_S406	0.624435	-0.0445741	4.10146	0.00013002	0.000321472	0.199899
ATXN1_S88	-0.541343	0.0418235	-4.62041	2.36e-05	6.65e-05	1.86257
ATXN1_Y247	-0.74781	0.138897	-5.27607	1.79e-06	6.09e-06	4.2928
ATXN1L_S284	1.48991	-0.204944	8.55399	7.43e-12	5.78e-11	16.607
ATXN1L_S615	1.60351	-0.204421	6.79277	5.32e-09	2.66e-08	10.0666
ATXN2_S466	0.596753	-0.102698	4.19566	9.65e-05	0.000244155	0.491504
ATXN2_S667	0.658788	-0.0131765	4.00539	0.000187982	0.000452648	-0.139549
ATXN2_S669	-1.18086	0.0928409	-5.60908	9.95e-07	3.51e-06	5.01238
ATXN2_S784	-0.61649	0.136159	-3.87154	0.000327479	0.000752774	-0.58356
ATXN2_S861	1.11822	-0.0709412	7.08665	2.76e-09	1.44e-08	10.7636
ATXN2_S863	0.654859	0.0464655	3.7762	0.000359877	0.000819253	-0.836017
ATXN2_S865	-0.562802	0.232674	-2.35781	0.0226118	0.0363637	-4.52795
ATXN2_T741	0.579229	-0.0612069	2.60292	0.0115558	0.0197731	-4.07271
ATXN2_T853	0.573162	0.0944182	4.12723	0.00011726	0.000292413	0.294567
ATXN2L_S32	-0.588166	0.00087931	-4.12585	0.00011228	0.000280918	0.27855
ATXN2L_S339	2.30291	-0.300889	9.67916	1.05e-13	1.13e-12	20.8376
ATXN2L_S424	0.826465	-0.159224	4.06962	0.000135875	0.000334713	0.0954088
ATXN2L_S594	0.462846	-0.00908621	3.99545	0.000174405	0.000421878	-0.143948
ATXN2L_S680	1.08794	-0.0349556	4.6405	2.64e-05	7.35e-05	1.89883
ATXN2L_S684	2.92643	-0.368061	7.18419	2.32e-09	1.23e-08	10.9966
ATXN7L3_S288	0.351959	0.0673448	2.76263	0.00754156	0.0133867	-3.6846
ATXN7L3B_S92	-0.468743	0.136491	-2.95285	0.00446959	0.00829883	-3.20074
AUP1_S385	1.74535	-0.124106	8.7862	9.01e-12	6.91e-11	16.492
AUP1_T367	0.8453	-0.0189565	3.51937	0.000934153	0.00197564	-1.53433
AUTS2_S150	0.746217	-0.224783	2.22378	0.0307251	0.0480116	-4.74811
AUTS2_S319	-0.484473	-0.0138913	-2.97993	0.00444762	0.00826508	-3.05807
AUTS2_S956	1.07377	-0.283673	3.04514	0.0036224	0.00684986	-2.97577
AVEN_S261	1.36132	0.0305294	5.01228	5.96e-06	1.86e-05	3.20348
AVEN_S94	2.08337	-0.263849	9.37082	3.96e-13	3.81e-12	19.5328
AVEN_Y99	0.932849	-0.0749804	3.7197	0.000470756	0.00104799	-1.01727
AVL9_S246	0.983113	0.00475556	3.39869	0.00135614	0.00277874	-1.94127
AVL9_T333	-4.22485	0.451589	-10.2681	8.03e-15	1.06e-13	23.3539
AXIN1_S486	1.88915	-0.268116	7.70507	7.2e-10	4.13e-09	12.2609
AZI2_S353	-0.790659	0.0860545	-6.97148	3.06e-09	1.59e-08	10.5896
BABAM1_S29	0.713478	-0.103345	5.75899	2.85e-07	1.1e-06	6.09501
BACH1_S196	-0.95685	0.238293	-4.09426	0.000125	0.000309632	0.175474
BACH1_S417	0.546153	0.0542791	2.45148	0.0180134	0.0295911	-4.26374
BAD_S118	-1.06853	0.291276	-4.50986	2.96e-05	8.16e-05	1.56556
BAD_S134	-0.907388	0.211414	-5.64451	4.43e-07	1.65e-06	5.66311
BAD_S25	0.593565	-0.0238704	4.30841	6.46e-05	0.000168322	0.873629
BAD_S34	-0.980136	0.177229	-5.33765	2.11e-06	7.09e-06	4.28807
BAD_S99	-0.705766	0.192638	-4.39576	4.42e-05	0.000118335	1.17683
BAG3_S289	0.725825	0.0190862	3.22037	0.00204203	0.00406006	-2.47571
BAG3_S377	1.20289	-0.105176	6.21689	7.24e-08	3.05e-07	7.53398
BAG3_S381	1.54395	-0.235069	5.03093	4.47e-06	1.43e-05	3.40027
BAG3_S386	0.706234	0.0195345	3.11567	0.00278212	0.00539254	-2.76426
BAG3_T217	-1.09141	0.1395	-2.28342	0.0262323	0.0416596	-4.74243
BAG4_S179	1.51599	-0.21832	6.83533	7.73e-09	3.77e-08	9.75306
BAG4_S289	-1.06976	0.0842041	-6.41389	4e-08	1.74e-07	8.1806
BAG6_S1081	-1.36075	0.213824	-7.71763	2.57e-10	1.58e-09	13.119
BAG6_S1117	-2.36974	0.370086	-10.8398	6.24e-16	1.04e-14	25.8755
BAG6_S113	-0.889619	0.0600377	-4.78568	1.25e-05	3.7e-05	2.46731
BAG6_S964	-0.519535	0.0236379	-3.40339	0.00117271	0.00243671	-1.95524
BAHD1_S121	0.758579	0.0361818	2.89502	0.00569745	0.0103558	-3.27861
BAHD1_S184	-0.508115	0.0188723	-2.83825	0.00650269	0.0116975	-3.46464
BAIAP2_S261	1.29449	-0.0933793	6.42153	2.15e-08	9.76e-08	8.63911
BAIAP2_S325	-3.8516	0.356397	-10.6647	1.21e-15	1.91e-14	25.217
BAIAP2_S366	0.548946	-0.068569	2.99402	0.00395481	0.00741968	-3.09075
BAIAP2_T455	0.785506	-0.144318	3.52806	0.000935794	0.00197863	-1.58484
BAIAP3_S115	-1.80144	0.240534	-7.58317	2.13e-10	1.33e-09	13.2084
BAP1_S521	1.09243	-0.194891	7.25944	9.98e-10	5.6e-09	11.7006
BARD1_S364	-0.33522	0.0506818	-2.27719	0.0272865	0.0431999	-4.69864
BASP1_S164	-4.37048	0.199586	-10.1777	7.75e-15	1.03e-13	23.3678
BASP1_S172	-4.77501	0.328917	-8.09876	9.09e-11	5.99e-10	14.2175
BASP1_S194	-3.76159	0.448943	-11.1342	6.59e-16	1.1e-14	25.8981
BASP1_S219	-3.1518	0.379379	-13.2422	1.04e-19	4.97e-18	34.5362
BASP1_T162	-4.7815	0.333417	-9.63474	3.82e-13	3.69e-12	19.6259
BASP1_T190	-3.80863	0.384739	-9.37515	1.39e-12	1.21e-11	18.3655
BASP1_T196	-3.40255	0.183431	-11.1411	2.02e-16	3.78e-15	27.0009
BASP1_T31	-3.12264	0.333891	-9.23022	4.86e-13	4.63e-12	19.28
BASP1_T36	-4.46483	0.209368	-10.5334	2.43e-15	3.56e-14	24.5325
BATF3_S31	0.59417	-0.137615	2.6507	0.0104319	0.0180359	-3.91556
BAZ1B_S1342	0.532945	0.0844706	2.60182	0.0118998	0.02031	-4.03175
BAZ1B_S1468	-0.450109	-0.035931	-2.93791	0.00463825	0.00858182	-3.23808
BAZ1B_S189	1.81419	-0.102188	4.07552	0.000158105	0.000384906	0.220659
BAZ1B_S349	0.818667	-0.244111	3.35414	0.00140987	0.00288173	-2.11359
BAZ1B_S705	0.686014	-0.0611034	4.4208	4.05e-05	0.000109203	1.26171
BAZ1B_S947	0.674415	-0.023569	3.99362	0.000175473	0.000424344	-0.149799
BAZ2A_S1397	0.562079	0.00763793	2.77281	0.00733539	0.0130539	-3.65926
BAZ2A_S1770	0.743658	0.000977778	3.4941	0.00102144	0.00214618	-1.6732
BBS2_S365	-0.894168	0.0351379	-6.36293	2.71e-08	1.21e-07	8.41156
BBX_S243	0.400474	-0.0648222	2.20978	0.0318395	0.0495826	-4.83823
BBX_S649	0.67946	-0.0447209	3.60847	0.000746508	0.00160706	-1.36444
BCAN_S419	-0.748195	-0.0302069	-3.59971	0.000634771	0.00138534	-1.37531
BCAP31_S283	0.728351	-0.0362241	2.995	0.00394376	0.00739975	-3.08816
BCAR1_S694	-2.5142	0.278109	-13.0579	1.04e-17	2.73e-16	30.1121
BCAR1_S740	0.604939	-0.166931	2.58301	0.0121739	0.0207453	-4.11982
BCAR3_S363	-0.622271	-0.00343478	-4.00334	0.000207651	0.000494949	-0.158378
BCAR3_S370	-0.705674	0.12402	-3.56136	0.000771819	0.00165684	-1.48712
BCAS1_S314	-2.50382	-0.45746	-4.3398	6.32e-05	0.000165002	0.915701
BCAS1_S351	-2.65054	0.167353	-8.31163	2.78e-11	1.98e-10	15.3279
BCAS1_S399	-1.12002	0.000488889	-3.42473	0.00125565	0.00259143	-1.86854
BCAS1_S535	-2.02843	0.168019	-9.08794	1.14e-12	1.01e-11	18.4528
BCAS1_S552	-2.75004	0.270466	-5.59289	5.4e-07	1.99e-06	5.46924
BCAS1_T354	-2.6884	0.277511	-5.28301	2.93e-06	9.63e-06	3.98674
BCAS1_T482	-2.76167	0.277086	-8.56435	4.26e-12	3.43e-11	17.0908
BCAS3_S600	-1.23524	0.0236471	-7.65516	3.25e-10	1.97e-09	12.886
BCAS3_S745	-2.90735	0.340078	-14.0773	7.48e-20	3.89e-18	34.9438
BCAS3_S880	0.587414	-0.00426087	3.82322	0.000367109	0.000833865	-0.704412
BCCIP_S42	0.615751	-0.168241	2.52732	0.0140646	0.0236733	-4.24998
BCKDHA_S337	-2.61805	0.472862	-13.138	1.49e-19	6.87e-18	34.1758
BCL10_S138	0.599089	0.0206852	2.88199	0.0055374	0.0100965	-3.38839
BCL11A_S205	-1.81212	0.236709	-9.10315	7.89e-13	7.22e-12	18.827
BCL11A_S432	-2.73247	0.292875	-8.69648	1.05e-11	8.03e-11	16.3571
BCL11A_S608	-2.7473	0.205902	-9.51207	3.34e-13	3.27e-12	19.7227
BCL11A_S86	-2.97705	0.205017	-11.6291	3.31e-17	7.51e-16	28.8005
BCL2L13_S329	-0.908867	0.209944	-5.93709	1.74e-07	6.96e-07	6.60504
BCL2L13_S395	2.65092	-0.186386	10.0395	1.58e-14	1.95e-13	22.6957
BCL2L13_S444	1.32147	-0.00458621	4.48665	3.21e-05	8.81e-05	1.48609
BCL2L13_S450	-2.7929	0.321707	-10.9172	4.67e-16	7.97e-15	26.1656
BCL2L13_S468	-3.60744	0.417776	-10.5639	1.77e-15	2.69e-14	24.8364
BCL3_S382	1.79941	-0.101511	4.21635	0.000106925	0.000268444	0.543672
BCL6_S343	1.22819	-0.0215636	6.37421	3.1e-08	1.37e-07	8.30066
BCL6_S361	-0.563147	0.0949783	-3.05983	0.00356061	0.00674254	-2.85137
BCL6_S404	1.24239	-0.115706	4.59682	2.56e-05	7.16e-05	1.8323
BCL7A_S113	-2.11226	-0.0278261	-8.68858	1.5e-11	1.12e-10	16.0301
BCL7A_S114	-1.61932	0.0681724	-5.37779	1.22e-06	4.25e-06	4.66787
BCL7B_S163	0.535575	-0.0602826	3.45083	0.00114729	0.00238787	-1.72871
BCL7C_S97	1.26268	-0.0683621	6.68836	7.5e-09	3.67e-08	9.68018
BCL7C_T118	-1.08506	0.0752745	-6.79895	8.16e-09	3.97e-08	9.69103
BCL9_S62	0.677278	-0.105453	3.51297	0.000876424	0.00186418	-1.61602
BCL9_S687	0.695922	-0.214623	3.40356	0.00122509	0.00253467	-1.93226
BCL9_S857	0.917157	-0.334298	2.88985	0.0056536	0.0102867	-3.28414
BCL9_T155	1.81265	-0.208069	8.89454	1.15e-12	1.02e-11	18.3904
BCL9_T257	-0.440791	0.062	-3.71116	0.000520234	0.00115006	-1.03724
BCL9_T315	0.714633	-0.179259	3.03846	0.0034813	0.00660957	-2.97259
BCL9L_S1010	-0.885406	0.0394906	-4.7285	1.53e-05	4.46e-05	2.27065
BCL9L_S118	1.20793	-0.0963962	5.68193	4.78e-07	1.77e-06	5.66124
BCL9L_S934	0.83438	-0.0894815	4.69179	1.7e-05	4.9e-05	2.16483
BCL9L_S954	0.898225	-0.178104	4.49532	3.93e-05	0.000106354	1.38747
BCLAF1_S119	1.67099	-0.210281	6.77192	5.77e-09	2.87e-08	9.98538
BCLAF1_S198	1.13067	-0.0510182	6.28694	4.34e-08	1.88e-07	7.96888
BCLAF1_S222	-1.05805	0.289466	-5.38112	1.21e-06	4.2e-06	4.68018
BCLAF1_S264	1.11075	0.051	5.03681	6.09e-06	1.89e-05	3.20272
BCLAF1_S268	0.905184	-0.0692759	4.70463	1.47e-05	4.3e-05	2.24046
BCLAF1_S290	-0.596728	0.111534	-4.14646	0.000104665	0.000263264	0.346039
BCLAF1_S385	0.903422	-0.129431	5.85868	1.94e-07	7.65e-07	6.4732
BCLAF1_S422	0.789533	0.101241	2.19869	0.0316508	0.0493166	-4.97014
BCLAF1_S512	0.767091	-0.0170517	5.00936	4.85e-06	1.53e-05	3.32257
BCLAF1_S648	2.51493	-0.235655	10.3075	4.71e-15	6.49e-14	23.863
BCLAF1_S760	1.7922	-0.187121	10.5887	1.61e-15	2.48e-14	24.9299
BCLAF1_T257	1.20368	-0.126041	4.72863	1.72e-05	4.95e-05	2.28785
BCLAF3_S100	1.80277	-0.156872	8.66397	1.39e-11	1.04e-10	16.0946
BCLAF3_S139	2.86582	-0.241526	13.6119	4.02e-20	2.3e-18	35.4977
BCLAF3_S192	0.37441	0.0555345	2.41361	0.0187713	0.0307117	-4.50859
BCORL1_T1035	0.673333	-0.0517143	2.63373	0.0110531	0.0189988	-3.90536
BCR_S122	-1.21509	-0.00865517	-4.76846	1.17e-05	3.47e-05	2.46462
BCR_S303	0.542591	0.112365	2.43826	0.0179659	0.0295243	-4.40592
BCR_S371	-1.60874	0.0534902	-4.67553	1.95e-05	5.57e-05	2.04845
BCR_S382	-2.59566	0.400245	-7.35809	1.22e-09	6.75e-09	11.5945
BCR_S459	-0.405256	0.0965172	-2.29913	0.0248886	0.0396883	-4.75892
BECN1_S64	-0.821585	0.112418	-5.18542	2.78e-06	9.16e-06	3.92442
BEGAIN_S246	-1.43938	0.152667	-9.21256	2.94e-12	2.42e-11	17.662
BEGAIN_S563	-1.71732	0.0972444	-6.83677	1.21e-08	5.71e-08	9.40224
BEND5_S361	-0.829369	-0.213647	-2.95248	0.00463299	0.00857392	-3.16753
BET1_S50	1.06878	-0.021069	3.35155	0.00137464	0.00281303	-2.1047
BET1L_S9	1.07817	-0.132451	4.88115	9.49e-06	2.86e-05	2.74997
BHLHE41_S122	0.71839	0.120138	3.57435	0.000687885	0.0014908	-1.45144
BICC1_S679	0.941296	-0.0312	3.82754	0.000339228	0.000776505	-0.64926
BICC1_S766	0.68942	0.209273	2.26341	0.027314	0.0432355	-4.83298
BICD1_S610	1.12767	-0.166534	5.07297	3.83e-06	1.23e-05	3.55212
BICD2_S568	0.967571	-0.189067	5.32263	2.56e-06	8.49e-06	4.07643
BICD2_S574	-1.59453	0.139897	-5.78282	2.6e-07	1.01e-06	6.18523
BICD2_S615	-0.503771	0.124022	-2.94029	0.00499872	0.00917863	-3.16201
BICRA_S1413	0.47632	-0.140259	2.80923	0.00663903	0.0119181	-3.56794
BICRAL_S934	1.09889	-0.241532	4.05476	0.000172531	0.00041775	-0.0352561
BIN1_S276	-2.91989	0.197234	-12.5577	3.34e-17	7.57e-16	28.9371
BIN1_S286	-1.38057	0.135879	-5.75423	2.91e-07	1.11e-06	6.07699
BIN1_S296	-1.90821	0.187448	-7.04474	1.82e-09	9.8e-09	11.0803
BIN1_S298	-3.47228	0.466414	-15.718	2.84e-23	6.26e-21	42.6815
BIN1_S303	-1.88175	0.23469	-13.0672	1.91e-19	8.55e-18	33.9302
BIN1_T323	-0.708188	0.107259	-3.4174	0.00112315	0.00234238	-1.91457
BIN2_S291	0.712667	0.00341379	3.97727	0.000185347	0.000446845	-0.20223
BIN2_S305	0.686799	0.145926	3.2154	0.00213328	0.004228	-2.45686
BIN2_S309	0.87924	0.0173621	4.38815	4.54e-05	0.000121269	1.1511
BIN2_S322	1.088	-0.0765333	4.28791	8.47e-05	0.000216443	0.711607
BIN2_S427	1.00833	0.004	3.2133	0.00213041	0.00422326	-2.50479
BIN2_S443	1.36407	-0.0991552	6.04116	9.56e-08	3.96e-07	7.17012
BIN2_S457	1.28918	0.0537447	4.63686	2.5e-05	7.02e-05	1.83151
BIN2_S462	0.858103	0.136043	3.23311	0.00215271	0.00426311	-2.43644
BIN2_S483	0.775892	0.0553125	3.43178	0.00118568	0.00246013	-1.82877
BIN2_S490	1.9908	-0.225321	6.40661	3.11e-08	1.38e-07	8.35147
BIN2_S530	1.03176	0.0236087	2.43341	0.018587	0.0304473	-4.36398
BIRC6_S577	-1.21917	0.158226	-6.89634	4.8e-09	2.41e-08	10.1992
BLNK_S129	0.599278	-0.00720454	2.89545	0.00569076	0.0103447	-3.27752
BLNK_S141	0.899392	-0.137314	4.34732	6.02e-05	0.000157929	0.956361
BLOC1S3_S65	-1.00084	0.0932414	-5.10134	3.45e-06	1.12e-05	3.65491
BLOC1S3_T63	-0.396068	0.00872414	-2.25653	0.0275822	0.0436205	-4.84948
BLVRA_S230	-2.15912	0.2996	-8.227	8.82e-11	5.84e-10	14.281
BLVRA_S237	-1.15666	0.172327	-6.50064	1.9e-08	8.71e-08	8.82141
BLVRB_S82	-1.1069	0.0688333	-7.34738	7.76e-10	4.43e-09	11.9945
BMP2K_S1029	0.663355	-0.042451	3.97881	0.000205015	0.000489402	-0.222744
BMP2K_S1107	0.388267	0.0234444	2.19709	0.0320343	0.0498384	-4.97014
BMP2K_S728	0.710913	0.00366667	2.68639	0.00968226	0.0168435	-3.78143
BMP2K_S949	2.76936	-0.37378	9.35977	6.94e-13	6.41e-12	19.0372
BMP2K_T1000	2.8075	-0.14883	7.50842	4.59e-10	2.72e-09	12.6066
BMPR2_S681	-0.673044	-0.0416481	-4.82419	1.06e-05	3.18e-05	2.57976
BMPR2_S863	-0.595685	-0.115362	-3.71744	0.00043541	0.000975405	-1.01738
BMS1_S552	0.564035	-0.0877917	2.95088	0.00474843	0.00876707	-3.12682
BMS1_S639	1.49629	-0.187612	6.79731	9.69e-09	4.65e-08	9.57999
BNIP2_S235	1.68929	-0.159886	10.6565	3.17e-14	3.68e-13	22.1808
BNIP3_S131	-2.41456	0.376756	-8.53843	2.98e-11	2.11e-10	15.3588
BNIP3_S151	-1.12732	0.188818	-7.42769	5.18e-10	3.04e-09	12.3509
BNIP3_S157	-2.97015	0.31282	-11.8864	1.12e-16	2.21e-15	27.6985
BNIP3L_S118	-1.8258	0.425523	-8.14587	1.36e-10	8.74e-10	13.8634
BNIP3L_S120	-1.40199	0.268176	-6.44104	3.13e-08	1.38e-07	8.36179
BNIP3L_S166	0.819884	0.0143276	3.80335	0.000329376	0.000756535	-0.751614
BNIP3L_S65	-0.802664	0.201776	-5.50305	7.6e-07	2.74e-06	5.13323
BOD1L1_S1077	0.460347	-0.0510862	2.51386	0.0145598	0.0244288	-4.2811
BOD1L1_S2475	1.62488	-0.16981	11.506	5.21e-17	1.14e-15	28.349
BOD1L1_S2780	-0.633713	-3.64e-05	-3.90938	0.000241927	0.000570407	-0.399728
BOD1L1_S2815	0.531463	-0.0553061	3.57381	0.000761193	0.00163665	-1.4647
BOD1L1_S2986	0.743778	0.00358621	5.38116	1.21e-06	4.2e-06	4.68032
BOD1L1_S3029	0.558005	-0.0441379	4.79548	1.06e-05	3.17e-05	2.55991
BOD1L1_S482	0.50038	-0.0126	2.72804	0.00882863	0.0154758	-3.68572
BOD1L1_S870	1.69092	-0.167017	7.10583	1.43e-09	7.83e-09	11.3212
BOLA1_S123	-0.525707	0.0685091	-3.40078	0.00121289	0.00251122	-1.93046
BOLA1_S81	0.629417	-0.0454318	2.8593	0.00627302	0.0113182	-3.36747
BORCS5_S75	-2.42537	0.320807	-12.6935	9.48e-19	3.33e-17	32.3469
BORCS6_S168	-0.49395	0.138586	-3.2986	0.00161448	0.0032636	-2.2557
BORCS7_S45	0.558756	-0.0413922	2.82148	0.0066443	0.0119251	-3.49994
BPGM_T122	-1.05817	0.0781379	-4.90423	7.13e-06	2.19e-05	2.94587
BPTF_S1184	1.38436	-0.0253654	6.8856	5.42e-09	2.71e-08	10.087
BPTF_S1547	0.362677	-0.0463111	2.24762	0.0291512	0.0458191	-4.76059
BPTF_S216	0.513768	-0.0296818	2.80168	0.00731652	0.013023	-3.50918
BPTF_S2339	-0.784862	0.0354828	-5.34804	1.37e-06	4.72e-06	4.55788
BPTF_S2345	1.19082	-0.17304	7.47791	7.02e-10	4.04e-09	12.1692
BPTF_S572	1.0321	-0.124145	7.01517	2.58e-09	1.36e-08	10.7951
BRAF_S151	1.03617	-0.137724	4.99744	5.06e-06	1.6e-05	3.27969
BRAF_S333	0.532528	-0.128604	2.20556	0.0314743	0.049068	-4.90543
BRAF_S365	-1.95672	0.112017	-11.3592	8.96e-17	1.83e-15	27.8085
BRAF_S729	-2.41192	0.301569	-16.4237	3.15e-24	1.04e-21	44.8595
BRAF_S750	-1.63122	0.158793	-10.157	8.39e-15	1.11e-13	23.2887
BRAF_T401	-0.424213	0.0637241	-2.30955	0.0242666	0.0387817	-4.73657
BRAF_T753	0.86368	-0.105672	4.39105	4.49e-05	0.000120135	1.16091
BRAP_S117	-0.573367	0.0286034	-5.27774	1.78e-06	6.05e-06	4.29894
BRAT1_S802	-0.978705	0.0485273	-5.2487	2.2e-06	7.38e-06	4.15239
BRCA1_S114	1.04469	-0.223694	4.45129	4.44e-05	0.000118936	1.31123
BRCA1_S1481	1.35881	0.00658	4.97315	7.09e-06	2.18e-05	3.08873
BRD1_S18	-1.1091	-0.0926087	-5.14333	4.55e-06	1.45e-05	3.54832
BRD1_S934	1.06783	-0.234176	5.1147	4.13e-06	1.32e-05	3.56075
BRD2_S668	1.25021	-0.212121	8.2852	1.29e-11	9.73e-11	15.9883
BRD3_S263	0.348141	-0.0571034	2.26136	0.0272643	0.0431687	-4.83928
BRD3_S563	0.961442	-0.0714138	5.45158	9.24e-07	3.28e-06	4.94155
BRD4_S1074	0.955866	0.038431	4.88068	7.78e-06	2.37e-05	2.86195
BRD4_S1128	0.902828	-0.0671552	5.06499	3.94e-06	1.27e-05	3.52326
BRD4_S601	0.681837	-0.0979655	4.17687	9.43e-05	0.000239155	0.44594
BRD4_T1212	1.8532	-0.19868	6.75862	1.03e-08	4.93e-08	9.5116
BRD7_S279	0.684773	-0.0360769	4.23651	8.57e-05	0.000218916	0.61038
BRD8_S387	0.471056	-0.0915472	3.41847	0.00117082	0.00243366	-1.88955
BRD8_S637	0.52846	-0.129431	3.30171	0.00159939	0.00323498	-2.24689
BRD9_S588	0.85329	-0.115672	4.39286	4.46e-05	0.000119416	1.16704
BRF1_S553	0.711991	-0.185379	3.11852	0.00275904	0.00535139	-2.75651
BRMS1L_S197	1.2192	-0.141549	6.42883	3.28e-08	1.44e-07	8.3166
BRPF1_S460	0.505198	-0.063549	3.53471	0.000837909	0.00178924	-1.56498
BRPF1_S462	-0.659966	0.0877759	-3.13673	0.00261562	0.00509531	-2.70679
BRPF1_S866	1.39596	-0.197431	7.91421	5.67e-11	3.85e-10	14.5198
BRPF1_T864	0.597439	-0.0212553	3.93578	0.000252682	0.000593838	-0.352287
BRPF3_S17	-0.470053	0.0267736	-4.08443	0.000139979	0.000344046	0.133711
BRPF3_S26	-0.875604	-0.00254545	-6.36037	3.27e-08	1.44e-07	8.248
BRSK1_S275	-2.78178	0.359622	-8.69184	1.75e-11	1.29e-10	15.9221
BRSK1_S311	-1.80336	0.175291	-6.7457	7.37e-09	3.6e-08	9.72127
BRSK1_S413	-1.06465	-0.135321	-5.0363	5.11e-06	1.61e-05	3.34059
BRSK1_S443	-1.81901	0.151914	-8.65198	3.01e-12	2.48e-11	17.4362
BRSK1_S508	-1.62538	0.0961277	-8.71221	1.17e-11	8.87e-11	16.2643
BRSK1_S519	-1.6853	0.0956552	-8.58301	3.96e-12	3.21e-11	17.1644
BRSK1_S527	-1.54015	0.155458	-8.89207	5.24e-12	4.16e-11	17.0513
BRSK1_S586	-2.08887	0.0430667	-9.15107	3.63e-12	2.95e-11	17.4538
BRSK1_S676	-1.07059	0.0395094	-7.46347	5.46e-10	3.2e-09	12.3517
BRSK2_S428	-0.98527	-0.110543	-4.53169	3.68e-05	0.000100019	1.46474
BRSK2_S469	-0.985166	-0.0502549	-5.05368	5.14e-06	1.62e-05	3.34758
BRSK2_S558	-1.8951	0.00763793	-7.54524	2.47e-10	1.53e-09	13.0582
BSCL2_S333	-1.42224	0.262422	-6.05341	1.96e-07	7.72e-07	6.64803
BSDC1_S109	-1.56999	0.0293478	-4.97656	8.11e-06	2.47e-05	2.98441
BSDC1_S404	1.23246	-0.026087	6.13854	1.35e-07	5.47e-07	7.00717
BSG_S362	-1.02339	0.22519	-5.85203	1.99e-07	7.84e-07	6.44793
BSN_S1009	-3.7241	0.585583	-10.5229	1.8e-14	2.2e-13	22.6643
BSN_S108	-3.1674	-0.0743571	-6.27431	4.3e-08	1.87e-07	7.97118
BSN_S1090	-2.07389	0.150151	-5.6756	4.89e-07	1.81e-06	5.63805
BSN_S1359	-1.15104	0.0140172	-4.23164	7.82e-05	0.000201015	0.626915
BSN_S1362	-1.70625	0.139618	-5.63279	5.25e-07	1.94e-06	5.51496
BSN_S1402	-1.39734	0.215304	-4.39549	5.79e-05	0.000152219	1.02474
BSN_S1457	-1.65979	-0.07756	-4.73846	1.61e-05	4.67e-05	2.28781
BSN_S1477	-4.87873	0.534521	-11.8469	2.28e-16	4.23e-15	27.0136
BSN_S1483	-2.66835	0.295848	-12.6059	4.04e-17	9.04e-16	28.7692
BSN_S1484	-3.59278	0.364522	-10.3671	4.9e-14	5.53e-13	21.7198
BSN_S1985	-1.27993	0.0898605	-5.46145	1.76e-06	5.97e-06	4.50721
BSN_S2024	-1.5318	0.21316	-4.8809	9.81e-06	2.95e-05	2.72415
BSN_S2041	-0.965456	0.0886897	-5.99314	1.15e-07	4.73e-07	6.98619
BSN_S2063	-1.17588	-0.0381897	-4.33717	5.42e-05	0.000143143	0.979253
BSN_S2536	-1.72701	0.0310196	-8.27405	3.19e-11	2.25e-10	15.1887
BSN_S2619	-2.63869	0.265873	-10.2011	1.25e-14	1.58e-13	22.9215
BSN_S2637	-3.61573	0.401444	-15.9121	8.6e-23	1.34e-20	41.621
BSN_S2802	-0.708356	0.10837	-3.98637	0.000190568	0.000458061	-0.211131
BSN_S2823	-1.03077	-0.118603	-2.34953	0.0220052	0.0354863	-4.64996
BSN_S2851	-2.90289	-0.00218605	-5.58067	1.16e-06	4.06e-06	4.91076
BSN_S2857	-2.23667	0.166069	-5.35515	1.33e-06	4.6e-06	4.58416
BSN_S2899	-2.42942	0.088587	-9.19545	2.58e-12	2.15e-11	17.7503
BSN_S3373	-3.21121	0.145862	-7.0284	1.94e-09	1.04e-08	11.0159
BSN_S3509	-2.3343	0.300586	-9.26697	2.66e-13	2.65e-12	19.8485
BSN_S3761	-3.16531	-0.327759	-5.87399	2.22e-07	8.66e-07	6.37018
BSN_S478	-1.80737	-0.156811	-3.30962	0.00162582	0.00328347	-2.19852
BSN_S970	-3.07281	0.176143	-8.93889	1.28e-12	1.12e-11	18.3049
BSN_T1092	-2.77622	0.558591	-14.8455	1.56e-19	7.16e-18	34.2903
BSN_T1165	-2.20702	0.120125	-5.09111	3.8e-06	1.23e-05	3.56946
BSN_T2043	-1.18983	0.06342	-4.41366	4.92e-05	0.000130782	1.15699
BSN_T2587	-2.92848	0.270808	-8.01004	7.59e-11	5.06e-10	14.3187
BTBD10_S127	-2.07387	0.214941	-13.7211	2.25e-19	9.87e-18	33.853
BTBD7_S1119	0.741526	-0.126983	5.15801	2.79e-06	9.2e-06	3.86088
BTRC_S127	-0.711823	0.00796078	-4.56398	2.87e-05	7.96e-05	1.67327
BUB1_S596	0.926632	-0.115	4.15323	0.000120169	0.000298854	0.409217
BUB1B_S670	0.76481	-0.227534	3.75547	0.000384967	0.000870683	-0.900203
BUB3_S211	-1.09654	0.107843	-9.41001	4.84e-13	4.62e-12	19.3539
BUD13_S197	0.892562	-0.0498276	5.0918	3.57e-06	1.16e-05	3.6203
BUD13_S248	1.55643	-0.184086	8.80082	1.67e-12	1.43e-11	18.0221
BUD13_S299	0.647994	0.034098	3.98058	0.000203834	0.000486849	-0.217205
BUD13_T135	1.39202	-0.146534	7.73324	1.17e-10	7.59e-10	13.8029
BUD13_T147	1.52385	-0.186783	4.34956	6.74e-05	0.000175121	1.05094
BUD13_T159	-1.07122	-0.0757818	-5.27417	2e-06	6.76e-06	4.2444
BZW1_S242	0.661089	0.0700185	2.87611	0.00562819	0.0102481	-3.40337
C11orf49_S310	0.695825	-0.132809	2.96447	0.00460652	0.0085292	-3.09476
C11orf58_S147	1.19138	-0.314379	4.84119	8.98e-06	2.72e-05	2.72167
C11orf96_S72	0.972116	-0.215397	4.44306	3.74e-05	0.000101578	1.33738
C11orf96_T55	1.43319	-0.187761	4.85149	1.25e-05	3.68e-05	2.56552
C12orf43_S210	0.609576	-0.0114815	3.13702	0.00268392	0.00521844	-2.6713
C12orf45_S15	1.0334	-0.550877	2.73633	0.00813226	0.014333	-3.75053
C16orf70_S270	-1.46372	0.131596	-7.40651	7.49e-10	4.29e-09	12.0476
C16orf70_S272	-2.33454	0.0238276	-11.2316	1.44e-16	2.79e-15	27.3367
C16orf70_S373	-1.94462	0.123241	-9.45566	1.27e-13	1.34e-12	20.5835
C16orf87_S91	2.54042	-0.324642	5.93541	1.85e-07	7.34e-07	6.75351
C17orf100_S54	-0.852561	0.00670213	-4.77488	1.56e-05	4.54e-05	2.33697
C17orf49_S110	0.915557	-0.121196	5.16289	4.26e-06	1.36e-05	3.61485
C17orf49_S96	0.579188	-0.116241	2.7416	0.00798468	0.0141043	-3.73676
C17orf75_S18	1.40402	-0.214408	6.49966	2.91e-08	1.29e-07	8.493
C18orf25_S145	0.638605	-0.110649	3.38763	0.00124104	0.00256402	-1.95914
C18orf25_S69	1.44317	-0.167754	7.66434	1.69e-10	1.07e-09	13.4793
C19orf47_S151	-0.537675	0.0514375	-3.19507	0.00238045	0.00467165	-2.53532
C1orf174_S148	1.32755	-0.0976491	6.54905	1.39e-08	6.49e-08	9.11995
C1orf174_S189	1.27582	-0.378518	3.39908	0.00120852	0.00250276	-1.87779
C1orf198_S129	-2.07056	0.226293	-9.96653	1.75e-14	2.14e-13	22.5585
C1orf226_S241	2.26868	0.0175345	9.93922	1.94e-14	2.35e-13	22.4535
C1orf226_S265	0.596179	-0.0337759	3.45133	0.00101125	0.00212707	-1.81563
C1orf226_S61	3.20868	-0.250328	10.0043	1.51e-14	1.88e-13	22.7035
C1orf35_S217	-1.45562	0.167588	-4.6027	2.51e-05	7.04e-05	1.80304
C1orf35_S220	1.69728	-0.436983	5.81854	2.27e-07	8.86e-07	6.3207
C1orf52_S158	0.828392	-0.170707	3.99031	0.000177434	0.000428908	-0.160444
C20orf27_S190	0.435998	-0.122879	2.92924	0.00475319	0.00877492	-3.26067
C2CD2_S435	-1.21497	0.218932	-7.37526	2e-09	1.07e-08	11.1574
C2CD2_S511	1.04437	-0.0290172	4.59272	2.2e-05	6.23e-05	1.851
C2CD2L_S358	-3.45799	0.34704	-11.9514	9.02e-17	1.84e-15	27.9114
C2CD2L_S374	-3.77497	0.640813	-12.9774	6.52e-18	1.79e-16	30.546
C2CD2L_S411	-3.48445	0.397017	-17.0788	4.31e-25	2.15e-22	46.8269
C2CD2L_S614	-1.058	-0.0514222	-4.05656	0.000178878	0.000432098	-0.00909649
C2CD2L_T422	-1.93067	0.189413	-7.78277	3.69e-10	2.22e-09	12.8495
C2CD2L_T622	-0.915943	0.0633462	-5.22493	2.68e-06	8.86e-06	3.97893
C2CD2L_Y407	-1.77415	0.320483	-13.3966	6.08e-20	3.25e-18	35.0676
C2CD3_S2114	-0.575751	0.103034	-3.4643	0.000971351	0.00204884	-1.77766
C2CD4C_S156	-0.83841	-0.0345345	-4.64916	1.8e-05	5.15e-05	2.04685
C2CD4C_S178	-1.14011	-0.0293261	-5.67966	6.92e-07	2.51e-06	5.39619
C2CD4C_S264	-0.443161	-0.0131724	-2.64338	0.0103873	0.0179677	-3.97614
C2CD4C_S74	-0.831639	-0.108358	-4.326	6.21e-05	0.000162325	0.917095
C2CD5_S249	-2.2608	0.357121	-13.2714	9.37e-20	4.6e-18	34.6371
C2CD5_S260	-0.789755	0.0137931	-7.28548	6.98e-10	4.01e-09	12.0306
C2CD5_S284	-3.44286	-0.395289	-5.29361	2.83e-06	9.31e-06	3.93859
C2CD5_S314	2.10757	-0.140894	11.7672	3.97e-16	6.96e-15	26.4921
C2CD5_S395	-2.49323	0.355418	-13.4289	1.43e-19	6.65e-18	34.2554
C2CD5_S675	-0.711616	0.0675098	-3.81145	0.000351791	0.000803139	-0.739451
C2CD5_S830	0.768667	-0.107276	3.7791	0.000356486	0.000812489	-0.826998
C2orf49_S148	1.72509	0.09172	7.09831	2.9e-09	1.51e-08	10.766
C2orf49_S189	0.315602	-0.0353269	2.32427	0.0237746	0.0380561	-4.65541
C2orf49_S193	1.25544	-0.0814828	6.73585	6.22e-09	3.08e-08	9.8662
C2orf88_S40	-2.45355	0.158196	-7.38245	9.06e-10	5.13e-09	11.868
C3_S742	0.532625	0.0206042	2.78869	0.0073837	0.0131319	-3.58554
C4orf19_S46	0.863617	0.138279	2.39539	0.0206536	0.033502	-4.38624
C6orf203_S111	-1.498	0.20772	-6.71422	1.21e-08	5.75e-08	9.34794
C7orf43_S495	-1.40451	0.0172069	-5.2003	2.38e-06	7.95e-06	4.01513
C7orf43_S517	0.904366	-0.0877451	4.29752	7.13e-05	0.000184578	0.793923
C8orf33_T40	-0.819367	0.167273	-3.95033	0.000255868	0.000600441	-0.346921
C9orf40_S76	1.09859	-0.233982	3.20366	0.00216089	0.00427736	-2.52521
C9orf40_S83	-0.577054	0.0285614	-2.70395	0.00887232	0.0155446	-3.7832
C9orf78_S15	2.49066	-0.343058	9.67162	1.56e-13	1.62e-12	20.5306
CA1_S221	-0.369467	0.100302	-2.31956	0.023981	0.0383603	-4.66593
CA2_S151	-1.71325	0.175604	-5.81735	2.88e-07	1.11e-06	6.15841
CA2_S216	-2.78568	0.44869	-12.5657	1.12e-18	3.88e-17	32.1715
CA2_S29	-2.31332	0.0808478	-6.76073	1.44e-08	6.73e-08	9.21516
CA2_S48	-1.17172	0.185333	-4.77627	1.37e-05	4.02e-05	2.39061
CAAP1_S203	0.511795	0.0158077	3.25093	0.0019522	0.00389523	-2.36629
CAAP1_S312	0.563029	-0.0144483	3.57372	0.000689249	0.00149339	-1.45332
CABIN1_T1927	0.506368	-0.1174	2.24772	0.0291438	0.0458117	-4.76037
CABLES1_S291	0.436188	-0.124052	2.20357	0.0312878	0.0488078	-4.96005
CABLES1_S311	1.64038	-0.233512	5.91946	3.6e-07	1.36e-06	6.06595
CACNA1A_S1097	-1.9478	0.109208	-8.15436	3.89e-11	2.7e-10	14.9733
CACNA1A_S2125	-2.20347	0.240488	-9.26344	3.68e-12	3e-11	17.495
CACNA1A_S753	-4.39947	0.269965	-13.1408	2.01e-19	8.87e-18	33.8914
CACNA1A_S793	-3.80611	0.353176	-14.0221	8.86e-20	4.39e-18	34.7758
CACNA1A_T2002	-3.38364	0.398268	-11.3259	1.62e-16	3.09e-15	27.2421
CACNA1A_T409	-2.38478	0.368828	-16.729	1.24e-24	5.02e-22	45.783
CACNA1B_S1916	-1.13367	0.00784	-3.85253	0.000313223	0.00072344	-0.623591
CACNA1B_S1960	-0.779025	-0.0758113	-2.72497	0.00853124	0.0149847	-3.7356
CACNA1B_S2233	-0.870238	-0.063	-2.83302	0.00647578	0.0116539	-3.47269
CACNA1B_S745	-1.9437	0.20569	-11.6871	2.67e-17	6.21e-16	29.0124
CACNA1B_S783	-3.51069	0.268632	-10.4391	3.47e-15	4.93e-14	24.1786
CACNA1B_S923	-5.15599	0.259887	-8.13002	4.27e-11	2.95e-10	14.8482
CACNA1C_S815	-2.80171	0.304591	-10.0293	2.39e-13	2.4e-12	20.1706
CACNA1E_S1049	-1.41452	-0.0812766	-6.71366	1.56e-08	7.26e-08	9.12508
CACNA1E_S14	-4.27417	0.324845	-12.3307	2.59e-18	8.05e-17	31.336
CACNA1E_S19	-3.77885	0.420229	-17.7553	1.1e-23	2.84e-21	43.6538
CACNA1E_S2094	-1.98852	0.0477069	-8.42206	7.5e-12	5.82e-11	16.5292
CACNA1E_S736	-2.71346	0.113727	-14.4674	4.88e-21	3.92e-19	37.6074
CACNA1E_T28	-2.79605	0.196435	-12.5908	4.23e-17	9.41e-16	28.7238
CACNA1G_S2046	-1.89486	0.11856	-11.1909	1.14e-15	1.82e-14	25.4036
CACNB1_S186	-1.295	-0.0104167	-7.73298	3.44e-10	2.08e-09	12.8599
CACNB1_T418	-2.09545	0.26382	-10.98	2.35e-15	3.45e-14	24.6698
CACNB1_T540	-2.48653	-0.0178302	-9.61079	1.62e-13	1.68e-12	20.4185
CACNB2_S488	-0.996613	-0.0531556	-4.40561	5.76e-05	0.000151348	1.08518
CACNB2_T219	-2.0234	0.305909	-10.1476	1.53e-14	1.9e-13	22.7487
CACNB3_S152	-3.25553	0.283638	-16.2018	6.25e-24	1.91e-21	44.1814
CACNB3_S393	-3.35581	-0.0744545	-8.06661	4.3e-11	2.97e-10	14.8205
CACNB4_S508	-3.48706	0.15866	-7.91308	9.76e-11	6.41e-10	14.0591
CACNG2_S249	-4.13071	0.20658	-10.0949	5.06e-14	5.67e-13	21.6133
CACNG2_S253	-4.67065	0.3734	-10.4116	1.67e-14	2.05e-13	22.7178
CACNG4_S255	-2.53763	0.0884375	-8.93211	4.54e-12	3.66e-11	17.193
CACTIN_S57	0.808799	-0.0661961	2.64711	0.0105767	0.0182592	-3.92479
CAD_S1406	2.48335	-0.0555517	8.78744	1.76e-12	1.51e-11	17.9695
CAD_S1828	-0.575325	0.0332955	-3.15238	0.00279493	0.00541457	-2.55654
CAD_S1859	1.66806	-0.182776	8.96431	8.75e-13	7.9e-12	18.6642
CAD_S1900	1.43305	-0.0500545	6.57434	1.43e-08	6.68e-08	9.14663
CADM1_S463	-1.34207	0.160069	-8.37264	9.12e-12	6.99e-11	16.334
CADM1_T451	0.640823	0.163052	3.74146	0.000402862	0.000908211	-0.943455
CADM3_S422	-3.86944	0.348879	-10.4981	2.28e-15	3.37e-14	24.5872
CADM4_S361	-1.34276	0.0813793	-5.67735	3.9e-07	1.47e-06	5.78673
CADPS_S1345	-3.12236	0.22281	-12.7891	5.07e-19	1.98e-17	32.9591
CADPS_S488	-2.70367	0.299964	-15.8497	6.69e-23	1.13e-20	41.8529
CADPS2_S1302	-2.98331	0.424948	-16.9033	7.31e-25	3.27e-22	46.3049
CADPS2_S65	-1.49795	0.0342222	-5.00516	5.54e-06	1.74e-05	3.25625
CADPS2_S839	-4.00505	0.631872	-10.6467	1.52e-14	1.89e-13	22.8717
CALCOCO2_S262	-0.559142	0.0879412	-2.82756	0.00653556	0.011752	-3.48478
CALCRL_S427	1.53583	0.00539655	5.32491	1.49e-06	5.12e-06	4.47255
CALCRL_T422	1.74068	-0.0731228	4.52162	2.9e-05	8.01e-05	1.63442
CALD1_S202	-1.78421	0.200983	-5.59741	5.3e-07	1.96e-06	5.48617
CALD1_S73	0.50642	-0.0573654	2.57681	0.0126423	0.0214657	-4.08977
CALD1_S759	1.69074	-0.179948	6.65235	8.65e-09	4.19e-08	9.53926
CALD1_S765	0.771351	0.0126364	2.23892	0.0298484	0.0467716	-4.77788
CALM2_S130	-2.48307	0.306431	-13.8136	1.69e-19	7.72e-18	34.1378
CALM2_S150	-1.93394	0.304707	-9.70296	4.85e-14	5.48e-13	21.5424
CAMK1_S363	-0.680667	0.00414035	-3.19265	0.00223259	0.00440778	-2.55572
CAMK1_T339	-0.809264	-0.0285435	-3.57742	0.000783685	0.00168066	-1.42706
CAMK1D_S327	-0.610376	0.0494483	-2.9227	0.0048415	0.00892189	-3.27765
CAMK2A_S272	-4.27802	0.248109	-9.45723	1.05e-12	9.38e-12	18.6454
CAMK2A_S275	-4.5504	0.682586	-11.3755	8.43e-17	1.75e-15	27.8687
CAMK2A_S279	-4.72814	0.722769	-15.1206	2.14e-21	1.95e-19	38.4528
CAMK2A_S332	-2.93652	0.455227	-13.6637	3.92e-18	1.14e-16	31.1051
CAMK2A_S342	-3.85532	0.445122	-16.514	1.63e-22	2.28e-20	41.0212
CAMK2A_S344	-3.6983	0.447958	-11.9154	1.83e-16	3.45e-15	27.2324
CAMK2A_T261	-2.93155	0.404075	-9.6837	1.24e-13	1.31e-12	20.6865
CAMK2A_T345	-3.9195	0.275655	-12.0301	1.69e-17	4.15e-16	29.5
CAMK2A_T347	-4.20667	0.338687	-14.3309	1.15e-19	5.44e-18	34.5544
CAMK2A_T348	-3.80428	0.399483	-11.7901	1.83e-17	4.44e-16	29.3876
CAMK2B_S367	-3.79809	0.303755	-9.63104	3.18e-13	3.13e-12	19.7961
CAMK2B_S395	-3.61524	0.429608	-12.8765	3.25e-18	9.75e-17	31.2001
CAMK2B_S397	-4.3091	0.214415	-12.9869	1.19e-18	4.06e-17	32.1675
CAMK2B_T287	-2.91618	0.426093	-9.24028	5.48e-13	5.17e-12	19.1996
CAMK2B_T321	-0.905625	-0.0603019	-2.89336	0.00539525	0.00985172	-3.31526
CAMK2B_T382	-3.68677	0.352438	-11.6301	4.6e-16	7.88e-15	26.3168
CAMK2B_T400	-4.09296	0.385426	-13.0117	7.95e-19	2.9e-17	32.5555
CAMK2B_T401	-3.2132	0.32954	-12.3565	2.4e-17	5.62e-16	29.2274
CAMK2D_S506	-0.600806	0.213478	-3.14827	0.00277326	0.00537656	-2.61824
CAMK2D_T370	-0.780961	0.251638	-2.9683	0.00455795	0.00844685	-3.08494
CAMK2G_S321	-2.89221	0.132138	-11.4205	7.14e-17	1.51e-15	28.0347
CAMK2G_S325	-3.18481	0.320603	-17.1284	3.72e-25	1.96e-22	46.9735
CAMK2G_S357	-2.47794	0.275089	-8.93259	7.65e-12	5.93e-11	16.7109
CAMK2G_S358	-3.94007	0.267655	-11.9795	9.2e-18	2.44e-16	30.0746
CAMK2G_S36	-3.00632	0.229729	-9.74508	2.6e-13	2.59e-12	20.0083
CAMK2G_S382	-1.43485	0.316055	-6.89417	4.14e-09	2.1e-08	10.2919
CAMK2G_S426	-0.751041	0.18702	-4.51243	3.43e-05	9.37e-05	1.50123
CAMK2G_T287	-2.62648	0.581596	-9.26773	6.86e-13	6.35e-12	18.996
CAMK2G_T37	-3.13	0.35198	-10.3221	1.83e-14	2.23e-13	22.6115
CAMK2G_T380	-0.996433	0.15187	-3.21168	0.00231295	0.00455097	-2.38824
CAMK2G_T386	-2.46221	0.281647	-9.2528	8.59e-13	7.78e-12	18.7838
CAMK4_S360	-4.43173	0.369236	-11.8933	2.74e-17	6.3e-16	29.0223
CAMKK1_S485	-2.52375	0.227759	-12.4831	1.5e-18	5.02e-17	31.8786
CAMKK1_S502	-1.03817	-0.00196552	-3.90753	0.000233769	0.000552744	-0.424292
CAMKK2_S129	-0.392097	0.0509623	-2.57992	0.0124922	0.0212316	-4.08208
CAMKK2_S133	-0.528642	0.0831569	-2.66142	0.0101877	0.0176452	-3.89071
CAMKK2_S495	-2.76324	0.235207	-12.7425	5.97e-19	2.27e-17	32.7953
CAMKK2_S511	-0.979349	0.0492745	-5.36726	1.66e-06	5.67e-06	4.45222
CAMKV_T406	-2.60602	0.398981	-11.5757	1.08e-16	2.16e-15	27.6622
CAMKV_T427	-3.80534	-0.222264	-6.88704	4.97e-09	2.5e-08	10.1268
CAMSAP1_S1232	1.02015	0.0177414	5.2716	1.82e-06	6.19e-06	4.27635
CAMSAP1_S1372	1.91639	-0.520426	5.80013	4.25e-07	1.59e-06	5.82277
CAMSAP1_S1378	2.69612	-0.325562	7.93064	1.67e-10	1.06e-09	13.6524
CAMSAP1_S1400	0.647786	-0.078898	2.74289	0.00829665	0.0145976	-3.64393
CAMSAP1_S431	-0.51715	0.00366038	-2.38203	0.0205876	0.0334043	-4.53045
CAMSAP1_S534	0.832418	-0.192833	3.71318	0.000501361	0.00111165	-1.01225
CAMSAP1_S563	0.709054	-0.0756379	4.17372	9.54e-05	0.000241493	0.435573
CAMSAP1_S793	-0.691137	0.05882	-4.00116	0.000193935	0.000465247	-0.164337
CAMSAP1_S862	-0.792789	-0.0241034	-3.9095	0.000232247	0.000549444	-0.41805
CAMSAP1_T1082	-1.25416	-0.0200217	-5.19755	3.77e-06	1.22e-05	3.7329
CAMSAP2_S1019	-0.403599	-0.0196379	-3.72356	0.000426895	0.000957685	-0.998591
CAMSAP2_S1148	-0.619762	0.0477414	-3.73895	0.000406146	0.000915024	-0.951184
CAMSAP2_S1293	1.05786	-0.148293	6.39368	2.4e-08	1.08e-07	8.53091
CAMSAP2_S1313	1.65241	-0.221776	8.37232	9.13e-12	7e-11	16.3327
CAMSAP2_S1343	0.923701	-0.120966	5.10848	3.36e-06	1.09e-05	3.68078
CAMSAP2_S416	2.66909	-0.514216	14.6914	1.17e-20	8.06e-19	36.7859
CAMSAP2_S439	1.1999	-0.0942609	5.36781	2.08e-06	7e-06	4.31604
CAMSAP2_S464	1.18475	-0.195983	6.70677	6.98e-09	3.43e-08	9.75227
CAMSAP2_S522	0.577356	-0.189345	2.89493	0.00523416	0.00957967	-3.34951
CAMSAP2_S566	0.512486	-0.0550455	2.22157	0.0310785	0.0485116	-4.81345
CAMSAP2_S599	-1.63188	0.0283448	-11.5539	4.36e-17	9.65e-16	28.5248
CAMSAP2_S673	0.554347	-0.0184528	3.15036	0.00260052	0.0050693	-2.63827
CAMSAP2_S862	1.18033	-0.182379	7.24679	8.14e-10	4.63e-09	11.8777
CAMSAP2_S931	-2.06683	0.256776	-14.1698	4.38e-21	3.59e-19	37.6814
CAMSAP2_S936	-1.58241	0.213341	-8.41267	5.42e-11	3.68e-10	14.778
CAMSAP2_T569	1.38762	-0.230549	6.10573	1.1e-07	4.51e-07	7.12522
CAMSAP2_T724	-1.56819	0.148019	-7.96733	7.94e-11	5.27e-10	14.2648
CAMSAP3_S368	-1.29058	0.0812353	-9.16313	1.19e-12	1.05e-11	18.4576
CAMSAP3_S459	-0.731241	-0.315412	-2.31622	0.024311	0.0388419	-4.6722
CAMSAP3_S514	-1.28118	0.0278448	-5.08454	3.67e-06	1.19e-05	3.594
CAMSAP3_S581	-1.66027	-0.283346	-4.52526	3.2e-05	8.79e-05	1.56231
CAMSAP3_S807	-2.62986	-0.0240893	-7.37256	5.87e-10	3.41e-09	12.2185
CAMSAP3_S841	-1.1307	-0.198138	-3.86062	0.000272952	0.000637864	-0.572338
CAMSAP3_T616	-1.23106	0.0241304	-6.46529	4.17e-08	1.81e-07	8.16457
CAND1_S558	-1.48466	0.216052	-8.8079	1.62e-12	1.4e-11	18.05
CANX_S608	0.936789	0.00675862	4.16895	9.69e-05	0.000245068	0.419907
CANX_S618	0.952354	-0.0167586	5.66002	4.17e-07	1.56e-06	5.72147
CANX_S637	3.78479	-0.428397	15.5409	4.98e-23	9.33e-21	42.125
CANX_T616	1.47395	-0.186818	7.15359	1.51e-09	8.23e-09	11.3286
CAP2_S301	-4.36464	0.240966	-12.2112	3.98e-18	1.16e-16	30.9086
CAP2_S305	-1.5678	0.0130345	-5.95407	1.34e-07	5.45e-07	6.83678
CAP2_S309	-4.12411	-0.0616034	-9.96066	1.79e-14	2.18e-13	22.5359
CAP2_S312	-2.83459	0.277421	-15.3449	1.39e-22	1.98e-20	41.1193
CAP2_T307	-2.8747	0.171436	-14.2227	1.07e-20	7.58e-19	36.8302
CAPG_S129	-0.540274	0.23925	-2.5296	0.0147691	0.0247467	-4.14961
CAPN1_S93	-0.39692	0.10325	-2.24813	0.0288474	0.0454153	-4.76111
CAPN5_T44	-3.35558	0.319478	-9.33689	1.58e-12	1.37e-11	18.2639
CAPRIN2_S660	-0.833989	0.165534	-5.56659	5.97e-07	2.18e-06	5.37068
CAPZA1_T63	-1.79581	0.274273	-9.17768	5.93e-13	5.56e-12	19.11
CARHSP1_S30	1.99682	-0.302157	7.2184	1.68e-09	9.08e-09	11.2555
CARHSP1_S41	0.675726	-0.0980172	3.68056	0.000490325	0.0010884	-1.13029
CARMIL1_S1049	0.675111	-0.0217586	2.22633	0.0296446	0.0464982	-4.9128
CARMIL1_S1151	2.15029	-0.0685283	5.92302	1.94e-07	7.65e-07	6.54835
CARMIL1_S1254	2.21702	-0.125224	7.50187	2.94e-10	1.79e-09	12.8865
CARMIL1_S1331	0.517825	0.0363621	2.28513	0.0257469	0.0409297	-4.78884
CARMIL1_S1360	1.794	-0.0659298	6.61378	1.08e-08	5.13e-08	9.33209
CARMIL1_S880	1.49655	-0.216078	5.49163	1.06e-06	3.72e-06	4.89609
CARMIL1_S968	1.23411	-0.0574375	6.74272	1.29e-08	6.08e-08	9.30584
CARMIL2_S1246	-2.28258	-0.0775	-6.51979	1.46e-08	6.81e-08	9.02161
CARMIL2_S1270	-1.23735	0.0121698	-4.31212	6.51e-05	0.000169491	0.871478
CARMIL2_S1416	-2.71259	0.1169	-9.72864	1.85e-13	1.89e-12	20.2959
CARS_S102	-1.32647	0.178138	-6.99224	2.24e-09	1.19e-08	10.8735
CARS_S117	0.613246	-0.00943636	4.24331	7.91e-05	0.000203179	0.628975
CARTPT_S48	-4.2973	0.384	-14.1953	5.71e-21	4.48e-19	37.4284
CASC3_S117	1.42856	-0.288771	5.43955	1.47e-06	5.04e-06	4.64376
CASC3_S265	0.876058	-0.121863	6.09434	1.14e-07	4.7e-07	7.08342
CASC3_S363	0.561946	-0.0235862	4.52209	2.83e-05	7.85e-05	1.60753
CASC3_S66	0.945728	0.0682264	3.46334	0.00102095	0.00214566	-1.76029
CASKIN1_S1242	-0.837703	-0.065549	-2.85999	0.00598209	0.010846	-3.40339
CASKIN1_S1257	-2.5801	-0.0472931	-7.26295	7.63e-10	4.36e-09	11.9415
CASKIN1_S1364	-1.18953	0.0478276	-6.4438	1.97e-08	9e-08	8.72574
CASKIN1_S390	-1.33293	0.0740172	-5.34016	1.41e-06	4.86e-06	4.5288
CASKIN1_S423	-1.88254	-0.116651	-4.82676	1.52e-05	4.41e-05	2.39632
CASKIN1_S646	-1.99569	0.169421	-8.24404	1.71e-11	1.26e-10	15.7209
CASKIN1_S787	-2.51344	0.0919138	-8.61853	3.44e-12	2.81e-11	17.3044
CASKIN1_S891	-0.729222	-0.0971509	-2.42351	0.0185784	0.0304447	-4.43886
CASKIN1_S919	-1.20444	0.0278966	-2.94358	0.00456454	0.00845711	-3.22329
CASKIN1_S935	-1.49874	0.342608	-4.70279	1.77e-05	5.09e-05	2.14075
CASKIN1_T1065	-1.29046	0.12463	-5.17637	4.06e-06	1.3e-05	3.66075
CASKIN1_T775	-2.24276	0.172642	-8.11421	4.53e-11	3.12e-10	14.8214
CASKIN2_S403	0.478134	-0.0659483	2.76128	0.00756937	0.0134346	-3.68797
CASKIN2_S471	1.39918	-0.263155	7.7676	1.02e-10	6.67e-10	13.939
CASKIN2_S927	-0.544595	0.0954884	-2.46793	0.0172992	0.0285551	-4.2881
CASKIN2_Y253	-0.585577	-0.023	-3.20079	0.00241059	0.00472495	-2.42262
CASP2_S340	1.47133	-0.236534	5.86409	1.9e-07	7.52e-07	6.4938
CASP3_S26	1.28959	-0.117943	5.66227	5.14e-07	1.9e-06	5.58932
CAST_S11	2.4936	-0.151897	11.9851	9.01e-18	2.4e-16	30.0946
CAST_S154	2.79839	-0.143069	8.84939	1.38e-12	1.2e-11	18.2131
CAST_S216	2.28503	-0.086902	7.33903	1.07e-09	5.96e-09	11.7059
CAST_S34	1.75004	0.197483	5.30257	1.62e-06	5.55e-06	4.39026
CAST_S456	1.03731	-0.047902	4.44387	4.34e-05	0.000116291	1.27382
CAST_S494	0.69709	-0.0998824	2.77506	0.00753254	0.013373	-3.61504
CAST_S51	1.03718	0.000236364	5.25684	2.14e-06	7.18e-06	4.1399
CAT_S515	-0.871279	0.0775862	-6.54025	1.35e-08	6.33e-08	9.1014
CAVIN1_S167	-2.60635	-0.23951	-6.39425	3.73e-08	1.63e-07	8.18864
CAVIN2_S203	-1.53876	0.275826	-4.60717	2.86e-05	7.91e-05	1.75848
CAVIN2_S218	-2.38761	0.376055	-8.13779	3.26e-11	2.3e-10	15.1287
CAVIN2_T199	-1.54213	0.141276	-5.43921	9.69e-07	3.42e-06	4.89559
CAVIN3_S165	-0.612456	0.167914	-2.52093	0.0142979	0.0240288	-4.26478
CAVIN3_S166	-1.19438	0.226649	-4.77333	1.18e-05	3.49e-05	2.4629
CBARP_S299	-0.843537	0.0756897	-4.20728	8.5e-05	0.000217138	0.546271
CBARP_S388	0.653825	-0.0227414	2.54995	0.0132663	0.0224249	-4.19736
CBARP_S414	0.908642	-0.0694655	3.34848	0.00138756	0.00283814	-2.11349
CBARP_T154	0.606223	0.057037	2.91308	0.00507926	0.0093167	-3.26294
CBFA2T2_S409	-0.977342	-0.0478	-3.01749	0.00388754	0.00730527	-2.94899
CBFA2T2_S551	-1.34211	0.0294889	-7.54152	9.85e-10	5.54e-09	11.8478
CBL_S483	0.673905	-0.047	6.16363	5.93e-08	2.52e-07	7.64086
CBL_S667	1.40121	-0.21163	5.32901	1.7e-06	5.78e-06	4.41263
CBL_S669	1.13515	-0.216306	4.23581	9.15e-05	0.000232389	0.564345
CBL_S675	0.804846	-0.171473	3.4286	0.00111398	0.00232605	-1.8503
CBL_Y455	1.68807	-0.191207	10.8414	6.21e-16	1.04e-14	25.8817
CBLB_S662	0.478747	-0.0713913	2.50222	0.0156692	0.0261169	-4.21058
CBR1_S149	-2.21474	0.345707	-10.8056	7.1e-16	1.18e-14	25.7474
CBR1_S151	-1.68418	0.329155	-9.08801	5.38e-13	5.09e-12	19.149
CBR1_T162	-2.28491	0.355255	-9.45511	8.68e-13	7.85e-12	18.85
CBR3_S192	-1.5829	0.180852	-10.8544	1.41e-15	2.2e-14	25.1275
CBX1_S89	-3.43283	-0.156245	-4.08936	0.000148177	0.000362611	0.0996131
CBX1_S91	-2.50906	0.0623333	-3.87966	0.000259639	0.000608385	-0.520496
CBX3_S176	1.13315	0.00318182	2.93768	0.00507437	0.00931046	-3.03831
CBX3_S95	1.63032	-0.179103	7.83504	7.78e-11	5.17e-10	14.2062
CBX5_S11	-0.925898	0.0704231	-4.26793	7.71e-05	0.000198552	0.712468
CBX5_S12	-1.48414	0.205729	-6.6383	1.89e-08	8.67e-08	8.92758
CBX6_S301	-0.369409	-0.0110769	-2.75738	0.00785913	0.0139065	-3.65733
CBX6_T282	-0.405733	0.0416667	-2.57416	0.0131334	0.0222217	-4.04736
CBX8_S191	1.04878	-0.154517	5.46505	8.78e-07	3.13e-06	4.99164
CBX8_S256	0.882771	-0.0813818	3.80573	0.000339159	0.000776448	-0.722339
CC2D1A_S239	0.591247	0.0186275	2.51017	0.0150479	0.0251679	-4.24373
CC2D1A_S292	2.74638	-0.155935	4.6416	2.54e-05	7.1e-05	2.07532
CC2D1A_S327	-0.928	0.116019	-7.08624	2.53e-09	1.33e-08	10.8415
CC2D1A_S674	-3.58392	0.108632	-11.1485	2.46e-16	4.52e-15	26.8154
CC2D1B_S528	0.598009	0.034	2.7913	0.00728988	0.0129835	-3.5777
CC2D1B_S593	-0.937806	0.195825	-4.33446	5.58e-05	0.000146938	0.957147
CCAR1_S685	1.2888	-0.325966	5.42415	1.03e-06	3.61e-06	4.83966
CCAR1_S697	-1.0385	-0.316466	-2.80611	0.00669627	0.0120036	-3.57581
CCAR2_S124	0.646673	-0.0426724	2.43406	0.0178327	0.0293357	-4.4628
CCAR2_S569	-0.943016	0.188759	-6.30005	3.47e-08	1.52e-07	8.16784
CCAR2_S627	0.728506	-0.148983	3.85412	0.000278856	0.000650092	-0.592769
CCAR2_S675	0.548211	-0.0945455	2.58613	0.0128067	0.0217201	-3.95972
CCAR2_S678	0.848943	-0.134345	5.74752	2.98e-07	1.14e-06	6.05161
CCAR2_S681	0.441872	-0.0135455	3.11269	0.00286084	0.00552853	-2.78
CCAR2_T484	-0.628012	0.01872	-3.71923	0.000477988	0.0010626	-1.02705
CCDC120_S291	-1.45757	-0.199437	-3.74717	0.000450852	0.00100715	-0.911047
CCDC120_S321	-1.60276	0.0462041	-7.98486	1.21e-10	7.83e-10	13.9245
CCDC137_S19	1.53069	-0.294239	5.90635	3.09e-07	1.18e-06	6.18939
CCDC14_S757	-0.744544	-0.0441818	-4.47553	4.71e-05	0.000125376	1.34296
CCDC149_S480	-1.03784	0.00952174	-5.27506	2.88e-06	9.46e-06	3.99773
CCDC177_S209	-1.72425	-0.241138	-3.32336	0.00149778	0.00304534	-2.18528
CCDC177_S232	-2.4511	0.260914	-9.28362	2.49e-13	2.5e-12	19.9135
CCDC177_S304	-1.13149	-0.0373621	-5.37348	1.24e-06	4.32e-06	4.6519
CCDC177_S311	-1.3374	-0.0592069	-5.4264	1.02e-06	3.58e-06	4.84803
CCDC43_T139	0.911986	-0.228862	4.42034	4.05e-05	0.000109347	1.26015
CCDC6_S240	0.601107	-0.0327241	3.44952	0.00101694	0.00213776	-1.82093
CCDC6_S363	1.17131	-0.242878	3.45696	0.00108663	0.00227356	-1.75082
CCDC6_S52	-2.3784	0.130103	-13.2599	9.76e-20	4.76e-18	34.5972
CCDC61_S334	0.760721	-0.00265517	5.17007	2.67e-06	8.83e-06	3.90483
CCDC61_S336	0.883906	0.0184737	4.59023	2.27e-05	6.41e-05	1.86982
CCDC61_S447	0.412016	0.0428519	3.31397	0.00159104	0.00322062	-2.18199
CCDC77_S210	0.71173	-0.0401552	4.37631	4.73e-05	0.000125955	1.11108
CCDC82_S131	0.81563	-0.0521552	3.33996	0.00142408	0.00290805	-2.1379
CCDC85A_S233	-5.4204	-0.172226	-7.94755	8.56e-11	5.67e-10	14.1898
CCDC85A_S255	-1.57023	-0.0712414	-4.89906	7.27e-06	2.23e-05	2.92744
CCDC85A_S301	-2.51701	0.00657447	-8.37344	3.9e-11	2.71e-10	15.0687
CCDC85A_S313	-3.17668	0.221538	-11.5198	2.21e-16	4.12e-15	26.9943
CCDC85A_S335	-4.258	0.390649	-12.3548	3.12e-18	9.41e-17	31.1604
CCDC85A_S369	-3.09206	-0.157935	-7.52152	9.38e-10	5.3e-09	11.8853
CCDC86_S18	0.911676	-0.114569	5.0637	3.96e-06	1.27e-05	3.51859
CCDC86_S217	2.86788	-0.100877	9.27464	3e-13	2.97e-12	19.7673
CCDC86_S80	-0.496977	0.0202308	-2.95071	0.00462679	0.00856468	-3.16993
CCDC86_S91	1.13393	-0.152466	6.01052	1.08e-07	4.44e-07	7.05272
CCDC86_Y164	0.787054	-0.00174138	3.96428	0.000193563	0.000464419	-0.243755
CCDC88A_S1019	-0.881073	0.0835098	-6.75994	9.45e-09	4.54e-08	9.54578
CCDC88A_S1416	1.29068	-0.169155	5.28883	1.71e-06	5.82e-06	4.33968
CCDC88A_S1427	1.13697	-0.11351	5.79753	3.44e-07	1.3e-06	6.04503
CCDC88A_S1461	2.02013	-0.239419	7.1013	5.84e-09	2.9e-08	10.1862
CCDC88A_S1560	-1.21832	-0.0608246	-3.7297	0.00042322	0.000950417	-0.941136
CCDC88A_S1586	1.09112	-0.215469	4.2492	8.75e-05	0.000223066	0.65657
CCDC88A_S1651	1.28487	-0.362431	4.89112	9.16e-06	2.77e-05	2.78428
CCDC88A_S1701	0.717825	-0.00867241	4.11371	0.000117014	0.000292008	0.238876
CCDC88B_S597	1.05995	-0.0604138	4.7621	1.2e-05	3.54e-05	2.44221
CCDC9_S362	1.77877	-0.106914	8.78131	1.8e-12	1.54e-11	17.9454
CCDC9_S386	-0.926007	0.0954783	-5.57677	9.96e-07	3.51e-06	5.03828
CCDC9_S80	0.402233	0.000137255	2.7609	0.00782453	0.0138495	-3.64987
CCDC92_S179	-0.670778	0.0364222	-2.96052	0.00472908	0.00873597	-3.11064
CCDC92_S211	-1.33103	0.0698448	-9.25592	2.78e-13	2.76e-12	19.8054
CCDC92_S278	-1.84911	-0.145621	-5.23442	2.1e-06	7.06e-06	4.13999
CCDC97_S212	0.473884	-0.100451	3.14853	0.00265466	0.00516732	-2.6499
CCDC97_S257	-1.1861	0.0417241	-6.35202	2.83e-08	1.26e-07	8.36924
CCDC9B_S201	-0.932776	0.189696	-5.32832	2.39e-06	7.96e-06	4.13481
CCDC9B_S55	1.57185	0.0899623	5.33313	1.74e-06	5.91e-06	4.39616
CCKBR_T496	-3.07619	0.323353	-19.1087	6.57e-26	5.21e-23	48.6945
CCM2_S164	-1.32795	0.184	-7.97598	4.43e-11	3.05e-10	14.7644
CCM2_S321	-0.639066	0.0946552	-3.80046	0.000332495	0.000762897	-0.760601
CCM2_S437	2.04886	-0.149947	6.80637	5.04e-09	2.53e-08	10.1195
CCND2_T280	-0.874568	0.0825682	-4.31859	7.87e-05	0.000202225	0.789327
CCNK_S324	-1.04874	0.249776	-4.78737	1.09e-05	3.25e-05	2.53127
CCNL1_S335	-0.437383	0.114931	-2.33953	0.0225527	0.0362821	-4.67175
CCNL1_S342	-1.27463	0.193145	-5.21985	2.45e-06	8.15e-06	4.04831
CCNL1_S374	0.672201	0.00954545	4.09751	0.000160508	0.000390485	0.101445
CCNL1_S445	0.587769	-0.103103	3.3671	0.00131086	0.00269485	-2.06004
CCNL2_S330	1.05755	-0.205552	5.26829	1.85e-06	6.26e-06	4.26421
CCNL2_S348	0.993244	-0.160407	6.38065	3.22e-08	1.42e-07	8.27102
CCNT2_S480	0.87793	-0.10119	5.83144	2.16e-07	8.45e-07	6.36967
CCNT2_S536	-0.633608	0.0792391	-3.48639	0.00103151	0.0021655	-1.68758
CCNY_S326	-2.03115	0.224138	-11.9401	1.06e-17	2.77e-16	29.9319
CCNY_T103	-2.5747	0.288558	-11.632	2.06e-15	3.08e-14	24.9229
CCNY_Y26	0.702256	-0.0874364	2.6202	0.0111634	0.0191694	-4.03263
CCNYL1_S105	0.771982	-0.0635862	3.47696	0.000933832	0.0019752	-1.74048
CCNYL1_S121	-0.89255	0.200925	-4.83377	1.06e-05	3.16e-05	2.63347
CCNYL1_S344	-0.611222	0.118845	-4.19181	8.96e-05	0.000228139	0.495194
CCP110_S372	-1.73067	0.00205882	-8.92331	2.88e-12	2.38e-11	17.5818
CCPG1_S190	0.789404	0.0295818	3.81797	0.000325972	0.000749507	-0.684512
CCSAP_S80	-1.75103	0.162569	-9.06475	5.89e-13	5.52e-12	19.0579
CCSER2_S488	-1.57285	0.172542	-10.712	9.54e-15	1.24e-13	23.2991
CCSER2_T430	-0.945153	0.05874	-7.00544	4.1e-09	2.08e-08	10.4227
CCT4_S236	-2.18103	0.308234	-13.8076	7.85e-19	2.88e-17	32.6602
CCT5_S346	-1.82776	0.33607	-10.372	1.01e-13	1.08e-12	21.0378
CCT6A_S246	-0.964568	0.0658864	-4.01702	0.000207309	0.000494269	-0.144754
CCZ1_S266	0.92873	-0.173078	5.62877	6.4e-07	2.33e-06	5.38887
CD163_S1085	0.686381	0.181207	2.80465	0.00672314	0.0120431	-3.57948
CD226_S290	1.06061	-0.0151373	4.03676	0.000169636	0.000411255	-0.0409805
CD276_S523	1.12656	-0.0987292	4.27194	8.3e-05	0.000212503	0.713214
CD2AP_S256	1.00991	0.0850862	3.11409	0.00279504	0.00541457	-2.76857
CD2AP_S458	0.808878	-0.0526379	4.16884	9.7e-05	0.000245092	0.419531
CD2AP_S510	0.795405	0.157347	3.50549	0.000937964	0.00198274	-1.6117
CD2AP_S86	1.0084	-0.0669167	5.09931	4.89e-06	1.55e-05	3.41704
CD2AP_T512	1.08254	-0.0639091	5.2314	3.68e-06	1.19e-05	3.72822
CD2BP2_S195	-0.754737	-0.266845	-2.19701	0.0317763	0.0494944	-4.9736
CD33_T299	2.28848	0.0282692	6.30005	4.97e-08	2.14e-07	7.94095
CD34_S346	1.5856	0.0488235	4.48903	3.72e-05	0.000100977	1.47272
CD44_S686	0.533023	0.0175345	2.38811	0.0200035	0.0325536	-4.56523
CD44_S697	1.26375	0.105431	4.48497	3.23e-05	8.86e-05	1.48033
CD44_S704	1.94166	-0.0934138	5.58274	5.61e-07	2.06e-06	5.43119
CD44_S706	2.75556	-0.212138	8.18475	1.93e-11	1.41e-10	15.591
CD44_S718	1.12102	0.0788448	3.72371	0.000426684	0.000957334	-0.99812
CD47_T79	-3.54998	0.411211	-13.1254	2.11e-19	9.31e-18	33.8387
CD74_S8	1.61082	-0.206608	3.83351	0.000327825	0.00075337	-0.672054
CD99_S168	-0.797542	0.00405263	-2.24562	0.0283721	0.0447237	-4.87177
CD99_T181	1.33186	-0.118925	3.11792	0.00285708	0.00552187	-2.726
CDAN1_S277	-0.674747	0.178217	-3.49574	0.00100296	0.00211116	-1.661
CDAN1_T71	-0.467168	0.0268793	-2.96976	0.0042379	0.0079057	-3.1547
CDC16_S560	-1.22251	0.0585217	-6.57216	2.84e-08	1.26e-07	8.5443
CDC20_T106	1.1683	-0.203655	3.38187	0.00125288	0.00258663	-2.01748
CDC37L1_S88	0.7947	0.026625	3.07659	0.00334038	0.0063656	-2.85179
CDC42BPA_S1616	0.851365	0.0162727	5.58724	6.23e-07	2.27e-06	5.34674
CDC42BPA_S1638	0.842939	-0.0284118	4.45695	4.15e-05	0.00011162	1.31708
CDC42BPA_S1708	0.529051	-0.036	2.78639	0.00747385	0.0132813	-3.59262
CDC42BPA_T366	-2.61759	0.511841	-11.2281	5.23e-15	7.17e-14	23.9691
CDC42BPB_S1686	1.49666	-0.491372	4.73088	2.09e-05	5.93e-05	2.20423
CDC42BPB_S363	-1.38661	0.157327	-6.08667	9.36e-08	3.88e-07	7.25068
CDC42BPB_T1678	-0.883333	0.121857	-3.98936	0.000205125	0.000489599	-0.162923
CDC42EP1_S101	-0.460314	-0.0750417	-2.54203	0.0140498	0.0236551	-4.1192
CDC42EP1_S121	2.50454	-0.443759	8.20148	1.8e-11	1.32e-10	15.6571
CDC42EP1_S192	0.67225	-0.156451	3.10395	0.00301832	0.00580519	-2.76965
CDC42EP1_S303	1.13819	-0.279759	3.78034	0.000355058	0.000809657	-0.823173
CDC42EP1_S350	0.97237	-0.121293	3.25587	0.00183629	0.00367786	-2.37635
CDC42EP1_S353	0.902816	-0.163276	3.86466	0.000269342	0.000630187	-0.559625
CDC42EP1_S71	-0.547166	0.0600392	-2.28795	0.0260203	0.0413417	-4.73232
CDC42EP1_T34	0.668693	-0.0683077	2.5457	0.0136944	0.0230947	-4.16197
CDC42EP1_T367	0.808492	-0.0791698	3.69161	0.000501308	0.00111165	-1.08608
CDC42EP2_S141	-0.923282	-0.00507843	-4.5365	3.16e-05	8.68e-05	1.58146
CDC42EP4_S109	1.30884	-0.0461053	4.55123	2.61e-05	7.27e-05	1.73581
CDC42EP4_S118	1.20717	-0.260483	5.28932	1.71e-06	5.81e-06	4.3415
CDC42EP4_S140	1.07953	-0.0862069	3.72593	0.000423626	0.000951207	-0.991277
CDC42EP4_S142	1.18139	-0.282865	3.99953	0.000188419	0.000453398	-0.146716
CDC42EP4_S174	2.67222	-0.470843	6.28196	5.68e-08	2.42e-07	7.81765
CDC42EP4_S292	1.25808	-0.0461228	5.05365	4.24e-06	1.35e-05	3.45902
CDC42EP4_S295	0.592654	-0.0178222	3.34392	0.0015929	0.00322371	-2.09307
CDC42EP4_S298	2.31138	-0.327182	6.50455	1.87e-08	8.59e-08	8.79769
CDC42EP4_S322	2.02795	-0.136175	7.65212	1.77e-10	1.12e-09	13.4313
CDC42EP4_S91	1.52118	-0.374107	3.08084	0.0031172	0.00597623	-2.76386
CDC42EP4_T188	1.46273	-0.223714	3.73224	0.000465445	0.00103696	-0.886626
CDC5L_T430	0.574289	-0.07054	3.90249	0.00026685	0.000624525	-0.41987
CDCA8_S219	0.679114	-0.102019	3.28525	0.00176359	0.00354241	-2.2188
CDH10_S784	-2.88674	0.184078	-10.6988	4.88e-15	6.7e-14	23.9295
CDH10_T701	-1.90955	0.182333	-9.87329	1.67e-13	1.72e-12	20.4509
CDH11_S714	-0.479773	-0.0621034	-2.51813	0.0144013	0.0241909	-4.27126
CDH22_S739	-2.23563	0.346191	-10.1518	7.99e-14	8.67e-13	21.2218
CDH6_S786	-1.05074	-0.0736909	-5.18799	2.75e-06	9.09e-06	3.89162
CDK11A_T583	0.502971	0.0320345	3.12687	0.0026924	0.00523319	-2.73374
CDK11B_S47	0.775023	-0.101017	4.29046	6.38e-05	0.000166328	0.822716
CDK11B_S65	1.3889	-0.320958	5.93154	2.49e-07	9.67e-07	6.33966
CDK12_S102	1.64698	-0.07275	5.63052	5.07e-07	1.88e-06	5.63039
CDK12_S1083	0.975567	-0.192259	5.50281	7.61e-07	2.74e-06	5.13235
CDK12_S274	0.55715	-0.0796379	4.62049	1.99e-05	5.68e-05	1.94721
CDK12_S301	1.34525	-0.2335	8.73279	9.25e-12	7.08e-11	16.4862
CDK12_S334	-0.686127	0.219886	-3.23646	0.00219963	0.0043484	-2.39166
CDK12_S383	1.00989	-0.160931	6.41097	2.24e-08	1.01e-07	8.59807
CDK12_S423	0.573723	-0.0584138	4.82292	9.6e-06	2.89e-05	2.65692
CDK12_S644	1.24584	-0.192045	5.50711	1.42e-06	4.89e-06	4.75987
CDK12_S681	0.829489	-0.101426	5.52692	8.15e-07	2.92e-06	5.09043
CDK12_T893	-0.960733	0.351611	-2.36123	0.0216047	0.0349051	-4.6226
CDK13_S260	2.74652	-0.0232692	4.8841	9.1e-06	2.75e-05	3.13799
CDK13_S317	-0.625367	0.102672	-2.83678	0.00615342	0.011122	-3.49827
CDK13_S325	0.958701	-0.0203966	4.45121	3.64e-05	9.9e-05	1.36511
CDK13_S383	1.37484	-0.159052	9.9767	1.68e-14	2.07e-13	22.5975
CDK13_S439	-0.720781	0.212642	-3.95856	0.000212072	0.000504521	-0.264802
CDK13_S664	1.08768	-0.163696	5.03415	6.65e-06	2.05e-05	3.17848
CDK13_T1058	0.753545	-0.0572444	2.9538	0.00481706	0.00888531	-3.12772
CDK13_T1147	1.16516	-0.198862	6.93668	2.8e-09	1.46e-08	10.6548
CDK13_T1246	0.694263	-0.17269	3.71661	0.000436577	0.000977518	-1.01992
CDK13_T494	1.30435	-0.0952667	5.93412	2.99e-07	1.14e-06	6.23163
CDK13_T588	0.881519	-0.114623	5.16041	3.26e-06	1.06e-05	3.82726
CDK14_S119	-0.723631	0.177255	-3.72841	0.00045799	0.00102218	-0.991082
CDK14_S120	-1.64283	-0.0407115	-6.07403	1.16e-07	4.77e-07	7.05929
CDK14_S24	0.570111	-0.138466	2.79946	0.00681957	0.0122033	-3.59253
CDK14_S95	-1.88295	0.194345	-9.34955	1.93e-13	1.96e-12	20.1705
CDK16_S169	-0.444197	0.188226	-2.53556	0.014002	0.0235793	-4.18508
CDK16_S193	1.09135	-0.0989649	3.88605	0.000254236	0.000597088	-0.5004
CDK16_S227	0.665152	0.0468276	3.22142	0.00203563	0.00404918	-2.47278
CDK17_S122	-0.8035	0.0820392	-4.76169	1.44e-05	4.22e-05	2.3409
CDK17_S137	1.03397	-0.152471	5.10819	4.23e-06	1.35e-05	3.53796
CDK17_S146	1.59808	-0.263897	6.14614	6.35e-08	2.69e-07	7.57351
CDK17_S165	-1.27608	0.155707	-10.9233	4.56e-16	7.84e-15	26.1887
CDK17_S180	0.892057	-0.10381	4.34485	5.28e-05	0.000139533	1.00507
CDK17_S523	-1.63456	0.183966	-8.4656	6.3e-12	4.94e-11	16.7011
CDK18_S74	-1.4629	0.20016	-5.01425	6.13e-06	1.9e-05	3.18286
CDK7_T170	-1.323	0.10518	-4.07905	0.000150364	0.000367344	0.0800845
CDK9_S347	1.27336	-0.136672	7.7091	1.29e-10	8.31e-10	13.7072
CDKL5_S377	-0.902488	0.108776	-4.45188	3.63e-05	9.87e-05	1.36739
CDS1_S37	-1.12214	0.259978	-3.08815	0.00331765	0.00632921	-2.83152
CDS1_T41	-1.38578	0.361167	-3.08921	0.00322303	0.00616353	-2.76701
CDS2_T51	-1.47657	0.275328	-6.31649	3.26e-08	1.44e-07	8.23149
CDV3_S30	0.888365	-0.123193	4.0478	0.000148422	0.00036296	0.0597081
CDYL_S162	0.848826	-0.208104	4.33556	6.72e-05	0.000174554	0.917331
CDYL_T38	0.72835	-0.0781522	4.04268	0.00018308	0.000441698	0.0204638
CEBPB_T226	0.845936	-0.0523774	3.28567	0.00174628	0.00351088	-2.26562
CEBPZ_S34	-0.531425	0.0259773	-2.51377	0.0153655	0.0256622	-4.18535
CEBPZ_S629	0.660511	0.00601923	4.554	2.9e-05	8.02e-05	1.65869
CELF1_S206	-0.674095	0.165913	-3.17521	0.00256799	0.00500981	-2.54632
CELSR1_S2871	1.16551	-0.212537	4.302	6.6e-05	0.000171812	0.85251
CELSR2_S2648	-1.21435	0.112086	-7.63682	1.72e-10	1.09e-09	13.4209
CEND1_S10	-3.58981	0.540448	-9.88203	2.42e-14	2.88e-13	22.2334
CEND1_S86	-3.86125	0.39669	-11.132	2.09e-16	3.9e-15	26.967
CEND1_S87	-2.76223	0.0275	-7.27372	7.31e-10	4.19e-09	11.9841
CEND1_S9	-3.39922	0.294491	-9.02454	1.44e-12	1.26e-11	18.2458
CENPA_S17	2.92633	-0.24831	8.50961	5.29e-12	4.2e-11	16.8748
CENPC_S709	1.04189	-0.0183148	6.937	3.79e-09	1.93e-08	10.3874
CEP112_S243	0.982189	-0.0718085	4.90762	9.91e-06	2.97e-05	2.78191
CEP128_S1008	1.79146	-0.143862	11.3354	9.79e-17	1.98e-15	27.7206
CEP131_S47	1.03993	0.0664314	4.29419	7.21e-05	0.000186463	0.78311
CEP131_S78	2.73793	-0.136719	10.8517	7.38e-16	1.21e-14	25.742
CEP131_S89	2.21734	-0.104226	9.68264	1.25e-13	1.32e-12	20.6826
CEP135_S441	0.446395	-0.0772069	3.33251	0.00145672	0.00296844	-2.15918
CEP152_S1461	0.682674	-0.0414118	4.00188	0.000190147	0.000457166	-0.150536
CEP164_S359	0.749602	-0.186795	3.09931	0.00324552	0.00620178	-2.75583
CEP164_S407	1.01895	-0.230898	3.39189	0.00132135	0.00271448	-1.93538
CEP170_S1059	0.544293	-0.1315	2.55073	0.0132398	0.02239	-4.19556
CEP170_S1079	-0.630326	-0.0409783	-3.07982	0.00336613	0.00640907	-2.79905
CEP170_S1112	0.612113	-0.230759	2.93744	0.00464441	0.00859081	-3.23931
CEP170_S1270	1.26224	-0.0676207	6.39281	2.41e-08	1.08e-07	8.52753
CEP170_S1407	2.23744	-0.351659	8.78182	1.53e-11	1.14e-10	16.0334
CEP170_S1522	-1.09214	0.0825517	-6.22206	4.71e-08	2.03e-07	7.86627
CEP170_S1529	-0.89846	0.0738448	-4.8131	9.95e-06	2.98e-05	2.62219
CEP170_S356	-1.02123	0.0427931	-6.30274	3.44e-08	1.51e-07	8.17824
CEP170_S359	-1.49416	0.0446897	-8.16728	2.07e-11	1.5e-10	15.5218
CEP170_S446	2.5874	-0.818491	6.4888	1.76e-08	8.08e-08	8.88678
CEP170_S466	1.5143	-0.184569	6.75221	5.83e-09	2.89e-08	9.93031
CEP170_S488	2.03291	-0.391271	9.05667	2.92e-12	2.41e-11	17.6328
CEP170_S497	1.38073	-0.144727	6.20035	6.06e-08	2.58e-07	7.68002
CEP170_S725	0.622388	-0.0441897	2.60893	0.0113751	0.0195004	-4.05846
CEP170_S930	-0.852751	0.063587	-5.81942	4.21e-07	1.58e-06	5.88454
CEP170_S968	1.55859	-0.258711	4.93096	9.86e-06	2.96e-05	2.80102
CEP170_T174	0.566195	-0.0862449	2.58326	0.0125913	0.0213854	-4.07602
CEP170_T644	1.57529	-0.171807	6.94106	2.96e-09	1.54e-08	10.6448
CEP170B_S1179	-0.596168	-0.0943043	-3.2992	0.00179488	0.00359947	-2.21029
CEP170B_S1510	-3.1742	0.245583	-11.4828	7.42e-16	1.22e-14	25.8399
CEP170B_S1513	-0.923369	0.0431458	-4.86617	1.1e-05	3.29e-05	2.66971
CEP170B_S360	-2.24389	0.203182	-13.8238	3.9e-20	2.25e-18	35.5401
CEP170B_S421	-0.866846	-0.0782667	-3.20829	0.00235936	0.00463286	-2.4025
CEP170B_S536	-1.58903	0.0204894	-6.75058	1.37e-08	6.41e-08	9.25768
CEP170B_S597	-1.99882	0.0479259	-7.83765	1.17e-10	7.59e-10	13.8728
CEP170B_S619	-1.03272	-0.182353	-3.63183	0.000620203	0.00135558	-1.27956
CEP170B_S655	-0.474181	0.0285417	-2.30513	0.0251951	0.040144	-4.64157
CEP170B_S772	-2.44657	0.188293	-8.1352	2.35e-11	1.69e-10	15.3949
CEP170B_S829	-1.73173	0.160207	-10.0286	1.38e-14	1.72e-13	22.7968
CEP170B_S853	-0.802903	-0.0495849	-4.08929	0.000137737	0.000338917	0.149223
CEP170B_S868	-2.18887	0.0797021	-7.23416	2.36e-09	1.25e-08	10.9963
CEP170B_S941	-2.03789	0.299875	-7.57312	6.16e-10	3.57e-09	12.3185
CEP170B_S969	-1.85455	0.171292	-11.2689	1.5e-15	2.31e-14	25.1424
CEP170B_S972	-3.32139	0.295109	-13.1252	3.96e-19	1.59e-17	33.2376
CEP170B_S986	-2.41822	0.0986897	-11.8694	1.37e-17	3.46e-16	29.6757
CEP170B_S988	-1.86201	0.272941	-11.1202	1.13e-15	1.8e-14	25.3838
CEP170B_T338	-3.0305	0.332862	-10.4375	2.87e-15	4.15e-14	24.3575
CEP170B_T542	-2.51785	0.255741	-12.7958	4.95e-19	1.95e-17	32.9823
CEP192_S1200	0.961821	-0.179983	6.47836	1.72e-08	7.93e-08	8.86021
CEP192_S1749	1.35503	-0.0221778	5.67414	7.48e-07	2.69e-06	5.32885
CEP192_S1755	1.02488	0.0121837	6.00888	1.77e-07	7.05e-07	6.71317
CEP250_S2332	0.380311	-0.0405185	2.41307	0.0190087	0.031071	-4.50855
CEP350_S1648	1.31589	-0.135886	8.74483	1.74e-11	1.28e-10	15.9081
CEP350_S2460	0.912493	-0.141826	6.45486	4.33e-08	1.88e-07	8.08575
CEP41_S344	-0.524418	0.0828298	-3.49025	0.00100665	0.00211797	-1.66937
CEP41_S355	-1.15007	0.124571	-7.03531	4.02e-09	2.04e-08	10.4107
CEP41_S364	0.522265	-0.168776	2.25353	0.0277816	0.0438961	-4.85581
CEP41_S96	-0.930121	0.108848	-5.61607	8.67e-07	3.09e-06	5.17482
CEP41_S99	-0.701167	0.0856809	-5.0061	7.04e-06	2.17e-05	3.06802
CEP68_S435	-0.37348	-0.0961522	-2.67227	0.0101538	0.0175917	-3.86888
CEP68_S478	-0.604819	0.0838103	-4.57461	2.35e-05	6.61e-05	1.7884
CEP89_S114	0.553474	0.00303448	3.55403	0.000733469	0.00158173	-1.51219
CEP97_S545	0.741036	0.153603	3.28771	0.00166847	0.00336227	-2.28654
CEPT1_S18	-0.858786	0.124089	-4.45648	4.87e-05	0.00012934	1.248
CERS1_S330	-1.41687	0.283473	-4.54537	2.78e-05	7.73e-05	1.68269
CERS4_S342	-0.84304	-0.0216087	-3.21281	0.0023054	0.00453816	-2.4453
CFAP36_S110	-0.58102	0.116138	-2.78313	0.00713148	0.0127196	-3.63347
CFAP97_S330	-0.949707	0.0765957	-5.23114	3.21e-06	1.05e-05	3.88342
CFDP1_S250	1.08167	-0.277397	4.52672	2.78e-05	7.74e-05	1.62344
CFL1_S156	-1.67076	0.238828	-11.0423	2.92e-16	5.3e-15	26.6331
CFL1_S24	-2.11492	0.271034	-8.32811	1.09e-11	8.29e-11	16.158
CFL1_T25	-2.09882	0.13919	-12.115	5.63e-18	1.57e-16	30.5632
CFL1_Y140	-1.24784	0.08914	-3.88852	0.000279102	0.000650578	-0.46281
CFL2_S24	-3.04882	0.299767	-10.4094	9e-14	9.73e-13	21.1783
CGN_S165	0.92109	0.00423256	3.8552	0.000351375	0.000802414	-0.587488
CHAF1A_S65	0.940624	-0.0662241	4.74821	1.26e-05	3.71e-05	2.39334
CHAF1B_S410	0.633048	-0.141517	2.99719	0.00391912	0.00735828	-3.08236
CHAMP1_S108	0.726032	-0.0845172	4.25057	7.32e-05	0.00018926	0.689787
CHAMP1_S145	0.616184	-0.078431	3.47201	0.00094832	0.00200341	-1.75501
CHAMP1_S244	-0.587556	-0.0114444	-2.76555	0.00799814	0.0141237	-3.59522
CHAMP1_S282	-0.415782	0.012069	-2.40978	0.0189518	0.0309866	-4.51712
CHAMP1_S284	0.950615	-0.173672	5.79946	2.44e-07	9.49e-07	6.24831
CHAMP1_S311	0.979	-0.246615	4.14303	0.00011725	0.000292413	0.308962
CHAMP1_S319	0.669612	-0.112293	4.08053	0.000130952	0.000323547	0.130824
CHAMP1_S344	1.32373	-0.177569	7.3792	4.8e-10	2.83e-09	12.4011
CHAMP1_S355	1.42495	-0.202917	5.78889	4.18e-07	1.57e-06	5.83126
CHAMP1_S376	0.519533	-0.0819773	2.50499	0.0157056	0.02617	-4.20509
CHAMP1_S386	0.945619	-0.110448	5.20475	2.34e-06	7.83e-06	4.03141
CHAMP1_S405	1.80068	-0.170517	9.61924	6.72e-14	7.39e-13	21.2183
CHAMP1_S416	0.312939	-0.0436207	2.34355	0.0223309	0.0359585	-4.66299
CHAMP1_S427	0.782356	-0.223155	3.01669	0.00370631	0.00699487	-3.03065
CHAMP1_S443	1.00659	-0.440341	4.0701	0.00017516	0.000423646	0.0744452
CHAMP1_S459	0.80944	-0.0630517	5.76589	2.78e-07	1.07e-06	6.12111
CHAMP1_S476	1.22596	-0.233828	6.20144	5.11e-08	2.19e-07	7.78667
CHAMP1_S603	1.5978	-0.154907	7.15831	1.61e-09	8.74e-09	11.2706
CHAMP1_S627	0.795819	-0.111448	4.84758	8.77e-06	2.66e-05	2.74434
CHAMP1_S651	0.449046	0.0388571	3.01355	0.00395919	0.0074263	-3.01407
CHAMP1_S653	-0.451714	0.0457391	-2.26344	0.0279959	0.0441866	-4.72832
CHAMP1_T149	0.706548	-0.049186	3.4305	0.00126754	0.00261319	-1.86681
CHCHD3_S50	0.520501	-0.0421552	3.44434	0.0010334	0.00216922	-1.83607
CHCHD6_S13	-1.60646	0.20682	-12.5472	1.3e-17	3.31e-16	29.8392
CHD1_S1475	1.03021	-0.0840851	4.26568	8.67e-05	0.000221233	0.676511
CHD1_S215	0.470023	-0.0825385	2.50218	0.0152991	0.0255636	-4.26178
CHD1L_S888	1.99082	-0.0113636	5.94777	1.59e-07	6.39e-07	6.82733
CHD2_S1365	-1.22395	0.234587	-4.49072	4.22e-05	0.000113324	1.37962
CHD2_S1373	-1.15699	0.181396	-6.20497	6.69e-08	2.83e-07	7.59636
CHD2_S1801	-0.5145	-0.00757143	-3.0584	0.00348923	0.00662392	-2.84483
CHD2_S1807	-1.1063	0.0336538	-4.93507	7.59e-06	2.32e-05	2.96113
CHD2_S207	-0.48632	0.0428103	-3.25903	0.00181897	0.00364525	-2.36747
CHD3_S132	-0.48442	0.00163793	-2.39306	0.0197588	0.0322004	-4.55427
CHD3_S1423	-0.729326	0.055087	-2.97437	0.00451647	0.00838141	-3.07232
CHD3_S1660	-0.52943	0.196118	-2.50099	0.0154014	0.0257135	-4.26462
CHD3_S772	-0.349574	0.0294483	-2.32114	0.0235905	0.0378052	-4.71158
[truncated: 9,182 more rows]

## Sheet: NPC DEPPs
Phosphoprotein	logFC	AveExpr	t	P.Value	adj.P.Val	B
ANK2_S2664	-3.45567	0.684167	-22.5521	1.71122e-26	2.88598e-22	49.9718
RTN4_S441	-3.68211	0.637024	-21.5079	1.25677e-25	5.64055e-22	48.0488
KIAA1107_S745	-4.3685	0.766886	-25.2134	9.82186e-26	5.64055e-22	48.0273
GGT7_S83	-4.12881	0.636714	-21.4758	1.33781e-25	5.64055e-22	47.9884
SGIP1_S109	-3.46463	0.681972	-22.5814	2.3193e-24	7.823e-21	45.1554
ATP1A1_S452	-4.99601	1.02546	-22.5821	5.49822e-24	1.54546e-20	44.3084
ANK2_S2666	-3.99078	0.7225	-19.3464	1.01613e-23	2.14212e-20	43.7841
ZNF365_T175	-4.99057	1.13215	-19.6735	1.01561e-23	2.14212e-20	43.7835
GBF1_S233	3.94061	-0.915143	18.8091	3.21666e-23	6.02767e-20	42.6595
SGIP1_S108	-3.68694	0.763667	-19.1683	1.13181e-22	1.9088e-19	41.4343
PRKAR2A_S78	-3.52138	0.716359	-18.8851	2.00754e-22	3.07792e-19	40.8761
FBXL20_S377	-3.26929	0.4826	-20.2143	2.95291e-22	4.15006e-19	40.4407
MAP2_S1347	-4.29932	0.836738	-17.0989	1.50236e-21	1.90685e-18	38.8933
SRRM2_S1188	2.87439	-0.587821	17.8918	1.58291e-21	1.90685e-18	38.8597
PCLO_S1873	-4.94211	0.944821	-17.5826	3.06534e-21	3.35368e-18	38.2127
DMXL2_S1143	-3.27741	0.524939	-19.741	3.18167e-21	3.35368e-18	38.0736
DLG4_S458	-2.89761	0.492643	-16.4547	6.88422e-21	6.82955e-18	37.3962
NFASC_S1187	-3.91772	0.799571	-16.3762	8.3114e-21	7.78732e-18	37.2107
RAB5B_S125	-2.29268	0.403513	-16.9954	1.10223e-20	9.78374e-18	36.9579
WNK2_S1276	-2.98747	0.514098	-16.3937	1.37883e-20	1.13107e-17	36.7214
GGT7_S79	-3.63236	0.477103	-16.8846	1.40838e-20	1.13107e-17	36.7173
ADD2_S600	-4.34706	0.716119	-15.9986	2.076e-20	1.59144e-17	36.3088
PACS1_S651	-3.04777	0.680897	-16.6254	2.5114e-20	1.84151e-17	36.1492
NFASC_S1160	-4.58559	0.990556	-17.4599	2.6582e-20	1.86794e-17	36.0893
JPH1_T461	-4.30104	0.747556	-17.2979	3.69675e-20	2.38631e-17	35.7916
NFASC_S1177	-3.45541	0.70881	-15.7731	3.61245e-20	2.38631e-17	35.7625
RAP1GAP2_S659	-4.92082	0.528848	-18.3341	3.82036e-20	2.38631e-17	35.6912
CTNNA2_S262	-3.15741	0.553333	-16.3536	4.63823e-20	2.7937e-17	35.546
REPS2_S199	-2.56686	0.415229	-17.4598	5.10023e-20	2.96605e-17	35.4571
CNKSR2_S390	-2.57883	0.492949	-16.2642	5.68522e-20	3.10491e-17	35.3458
GGA3_S159	-2.38301	0.46019	-15.5886	5.70721e-20	3.10491e-17	35.3112
ANK2_S2246	-5.14964	0.849	-17.3406	6.46621e-20	3.4079e-17	35.2502
N4BP1_S300	1.85279	-0.397238	15.5081	6.97508e-20	3.56469e-17	35.1132
AP3B2_S752	-5.49746	1.25912	-15.4732	7.61137e-20	3.77546e-17	35.027
KIAA1549_S1412	-2.64836	0.474816	-16.3508	8.27233e-20	3.89761e-17	34.9694
ANK2_S2243	-5.49116	0.70522	-15.6439	8.31984e-20	3.89761e-17	34.9501
NDEL1_S198	-3.63082	0.746854	-15.6207	8.8052e-20	3.96388e-17	34.8942
MAPT_S68	-4.47189	0.672684	-16.2908	9.4564e-20	3.96388e-17	34.8383
SPTBN1_S2172	-3.77034	0.596143	-15.3847	9.50218e-20	3.96388e-17	34.8079
IWS1_S720	3.60108	-0.619825	15.8114	9.413e-20	3.96388e-17	34.8048
AJM1_S856	-3.92805	0.685119	-15.3791	9.63646e-20	3.96388e-17	34.7941
NDRG3_S338	-2.91877	0.527905	-15.3378	1.06918e-19	4.29327e-17	34.6914
NFASC_Y1163	-5.27218	1.09416	-16.1737	1.22894e-19	4.77823e-17	34.5969
SUCLA2_S279	-3.77334	0.52427	-16.4193	1.27495e-19	4.77823e-17	34.5527
SPAG9_T217	3.59033	-0.800357	15.2747	1.2533e-19	4.77823e-17	34.5345
MPP2_T162	-2.1334	0.39431	-15.2553	1.31645e-19	4.82651e-17	34.4859
NDEL1_S215	-3.27288	0.637452	-15.1779	1.60124e-19	5.74574e-17	34.2924
DDN_S567	-3.33223	0.792455	-17.4439	1.99682e-19	6.87274e-17	34.1331
MAP2_S1353	-4.23569	0.723071	-15.1022	1.94047e-19	6.81793e-17	34.1026
CPNE5_S575	-4.04611	0.8176	-15.4597	2.18372e-19	7.31875e-17	34.0092
ENO1_T41	-2.98373	0.306487	-15.676	2.2132e-19	7.31875e-17	34.0072
KIF21A_S1275	-3.43752	0.766351	-16.1345	2.37678e-19	7.70852e-17	33.9424
ANK2_S1732	-4.18222	0.712829	-15.1787	2.61594e-19	8.16998e-17	33.8192
PRRT2_S202	-4.52469	1.019	-14.986	2.60953e-19	8.16998e-17	33.8097
MBOAT7_S285	-3.14266	0.514881	-14.9755	2.68093e-19	8.22071e-17	33.7831
MAPT_Y729	-3.98303	0.675143	-14.9563	2.81538e-19	8.47883e-17	33.7347
NRCAM_S1251	-3.81204	0.786048	-14.9334	2.98577e-19	8.8342e-17	33.6766
YWHAZ_S110	-2.92191	0.418548	-14.8301	3.89295e-19	1.13198e-16	33.4142
C2CD2L_S411	-3.40762	0.681171	-15.0123	3.96449e-19	1.13324e-16	33.4085
SNAP91_S306	-3.92801	0.662262	-14.8153	4.04418e-19	1.13675e-16	33.3765
ARHGAP39_S173	-2.73979	0.548643	-14.8074	4.12682e-19	1.14096e-16	33.3565
LDHB_S85	-3.49682	0.5835	-16.1134	4.44596e-19	1.19018e-16	33.3365
CAMK2A_S279	-5.13108	0.644949	-15.3879	4.36426e-19	1.18715e-16	33.3274
PI4KA_S1424	-2.11117	0.338366	-14.9363	4.79849e-19	1.24502e-16	33.2198
RABGEF1_S414	-2.68816	0.567429	-14.7497	4.78954e-19	1.24502e-16	33.2092
ANK2_S2703	-3.65265	0.535952	-14.7381	4.93611e-19	1.26132e-16	33.1794
MAP2_T1154	-2.64919	0.508714	-14.728	5.06601e-19	1.26132e-16	33.1537
ADD2_S604	-5.14147	1.23903	-15.3083	5.2731e-19	1.26132e-16	33.1509
CAP2_S312	-2.74878	0.50469	-14.7157	5.2302e-19	1.26132e-16	33.1222
ATP5F1B_S415	-2.703	0.445436	-15.2939	5.45638e-19	1.27808e-16	33.1172
NES_S358	5.32735	-1.073	14.7124	5.27501e-19	1.26132e-16	33.1137
RASGRF1_S739	-3.54325	0.460571	-14.7098	5.31004e-19	1.26132e-16	33.1072
PFKM_S480	-2.87137	0.378476	-14.6893	5.59956e-19	1.29365e-16	33.0547
SLC35C2_S364	2.8052	-0.463659	14.8645	5.74899e-19	1.31023e-16	33.0349
ATP2B2_S63	-3.41898	0.487795	-15.2444	6.14093e-19	1.36272e-16	33.0005
DLG2_S133	-4.01984	0.546561	-14.8442	6.05197e-19	1.36089e-16	32.9903
SLC4A10_S297	-4.31692	0.60269	-14.6269	6.5836e-19	1.44198e-16	32.8945
ATP1A1_S407	-3.38114	0.682231	-15.187	7.04449e-19	1.52314e-16	32.865
AP3D1_S632	-4.80182	0.929143	-14.5854	7.33509e-19	1.5659e-16	32.7875
DNAJC6_T432	-3.80694	0.658167	-14.5693	7.64903e-19	1.61251e-16	32.7461
KCTD16_S130	-4.52601	0.781405	-14.5643	7.74788e-19	1.61319e-16	32.7334
CLCN3_S745	-2.47495	0.376342	-15.3222	8.6205e-19	1.77298e-16	32.668
XRN2_S526	3.85863	-0.652333	14.5187	8.72596e-19	1.77305e-16	32.6157
NRBP1_S430	-2.78649	0.595833	-14.4915	9.37005e-19	1.88126e-16	32.5452
KIAA1549L_S1295	-4.39497	1.032	-16.893	1.10925e-18	2.17529e-16	32.4352
CAMK2G_S325	-3.15834	0.529667	-14.4484	1.04891e-18	2.08115e-16	32.4335
ANK3_S3147	-3.80546	0.795548	-14.3719	1.28189e-18	2.48495e-16	32.235
PKM_T154	-2.38746	0.369718	-14.9215	1.33531e-18	2.55908e-16	32.2334
YWHAZ_S207	-2.80543	0.614952	-14.3419	1.38708e-18	2.62843e-16	32.1569
KCNC2_S505	-2.58306	0.550368	-15.0999	1.4515e-18	2.71994e-16	32.1552
RASGRF2_S727	-3.09838	0.702077	-14.8342	1.65076e-18	2.99531e-16	32.0239
ARHGAP20_S828	-2.27619	0.46505	-14.636	1.65173e-18	2.99531e-16	32.0053
KIAA1549L_S1310	-4.14347	0.739857	-14.2789	1.63753e-18	2.99531e-16	31.9925
JPH1_S413	-3.0718	0.396077	-14.7919	1.82973e-18	3.24826e-16	31.9222
MAGI2_S622	-2.20567	0.432976	-14.2495	1.76964e-18	3.17499e-16	31.9157
NFASC_S1164	-4.51319	0.61881	-14.2017	2.00841e-18	3.52832e-16	31.7903
CAMSAP2_S416	2.80869	-0.517675	14.5331	2.13845e-18	3.67319e-16	31.7505
44085_S29	-2.01708	0.423262	-14.185	2.09918e-18	3.64976e-16	31.7465
DLGAP4_S609	-3.41604	0.8095	-14.92	2.22202e-18	3.71033e-16	31.7359
MDH1_T190	-3.35224	0.404095	-14.1749	2.15622e-18	3.67319e-16	31.72
PEX14_Y290	-2.94479	0.664905	-14.1661	2.20674e-18	3.71033e-16	31.697
ADD2_S697	-3.17159	0.516929	-14.1325	2.41305e-18	3.98981e-16	31.6085
NUAK1_S455	-3.47309	0.658293	-14.2864	2.52141e-18	4.1285e-16	31.5784
SPECC1_S315	4.63085	-0.742167	15.2629	2.88768e-18	4.5944e-16	31.4825
MAP1A_S1801	-4.92569	0.742262	-14.0823	2.75751e-18	4.47168e-16	31.4763
MAP1A_S1013	-4.67295	0.947952	-14.0712	2.8397e-18	4.5611e-16	31.4472
HK1_T454	-3.9448	0.550125	-16.3291	3.27805e-18	5.16676e-16	31.3838
PCLO_S3585	-2.91636	0.376571	-14.0047	3.39093e-18	5.29519e-16	31.2714
ANK2_S2704	-3.93068	0.7675	-13.9978	3.45475e-18	5.34535e-16	31.2529
KCTD8_S155	-2.76206	0.551088	-15.6269	4.02949e-18	5.96117e-16	31.1933
AP1S1_S147	-2.06474	0.481929	-13.9725	3.69636e-18	5.66413e-16	31.186
ATP1A1_S228	-2.6111	0.399643	-13.9693	3.72795e-18	5.66413e-16	31.1775
ATP1A1_S499	-3.47559	0.441071	-13.9648	3.77319e-18	5.68168e-16	31.1656
SPTBN1_S2048	-2.03268	0.387028	-15.0883	4.27909e-18	6.27538e-16	31.1134
ARFGEF1_S52	-2.8074	0.647405	-13.9423	4.00782e-18	5.96117e-16	31.1058
MACF1_S1847	-2.64724	0.438436	-14.4171	4.59958e-18	6.63008e-16	31.0106
THY1_T73	-3.09806	0.454769	-14.4098	4.68288e-18	6.63671e-16	30.9929
DENND6B_S106	-3.14184	0.685641	-14.4059	4.72894e-18	6.64612e-16	30.9832
GABBR1_T930	-3.10208	0.558095	-13.8937	4.5648e-18	6.63008e-16	30.9768
GNG3_S12	-3.60014	0.376024	-14.0508	4.65816e-18	6.63671e-16	30.9705
LUZP1_S905	-2.26019	0.362357	-13.8748	4.80306e-18	6.69451e-16	30.9264
RAP1GAP_S627	-4.11785	0.831214	-13.8588	5.01387e-18	6.93106e-16	30.8838
ADAM22_S928	-4.21438	0.827316	-14.4986	6.108e-18	8.11113e-16	30.7439
GPI_T254	-2.58337	0.391462	-14.3067	6.05266e-18	8.10143e-16	30.739
MYO9B_S1290	2.48582	-0.360857	13.801	5.85769e-18	8.0317e-16	30.7296
SPTBN1_S2160	-5.53526	0.801976	-13.7949	5.95626e-18	8.101e-16	30.7131
EPB41L3_S957	-2.89394	0.420475	-14.116	6.16656e-18	8.12493e-16	30.7048
CD47_T79	-3.46761	0.676119	-13.7903	6.02939e-18	8.10143e-16	30.701
LSAMP_S91	-3.11692	0.481214	-13.774	6.30023e-18	8.2367e-16	30.6574
OXR1_S364	-3.98751	0.745188	-15.9172	7.36802e-18	9.34298e-16	30.5959
ANK2_T2242	-3.87813	0.741816	-14.4354	7.12002e-18	9.23686e-16	30.588
IL1RAP_S592	-2.25733	0.313306	-14.8532	7.30483e-18	9.33303e-16	30.573
44081_T228	-2.29944	0.410071	-13.7231	7.22968e-18	9.30753e-16	30.521
ANP32B_T244	3.35506	-0.528881	13.6718	8.30795e-18	1.04562e-15	30.3831
CACNB3_S152	-3.12482	0.578786	-13.6673	8.41024e-18	1.05066e-15	30.371
SGIP1_S496	-3.22639	0.474974	-14.3426	8.92553e-18	1.09203e-15	30.3651
PRKAR2B_S114	-2.93701	0.484571	-13.6574	8.63797e-18	1.07117e-15	30.3445
WDFY3_S1942	-3.41926	0.597548	-13.645	8.93565e-18	1.09203e-15	30.3109
GRIN2B_S886	-2.86241	0.434738	-13.6408	9.0359e-18	1.09633e-15	30.2998
RAB3A_S188	-4.68446	0.828905	-13.6299	9.30848e-18	1.11477e-15	30.2703
NLGN2_S713	-2.67778	0.454476	-13.6294	9.32003e-18	1.11477e-15	30.2691
NIPBL_S850	2.96038	-0.504405	14.4761	1.05601e-17	1.24543e-15	30.201
SLC25A46_S61	-2.80109	0.404476	-13.5865	1.04737e-17	1.24393e-15	30.1534
UBE2O_S431	-3.18571	0.6695	-13.573	1.0867e-17	1.27272e-15	30.1168
SEC31A_S532	-2.64212	0.675381	-13.5391	1.19179e-17	1.38618e-15	30.0252
PNKD_S46	-4.20478	0.709417	-14.5957	1.32129e-17	1.49554e-15	30.0093
CRYAB_T162	-4.33338	0.726844	-15.6042	1.37819e-17	1.53928e-15	30.0071
PHB_S101	-3.56421	0.677881	-13.5243	1.24118e-17	1.43374e-15	29.985
CANX_S637	3.56213	-0.827071	13.5202	1.25491e-17	1.43973e-15	29.974
SLC7A8_S24	-4.41895	0.895857	-13.5132	1.27929e-17	1.45779e-15	29.955
RASAL2_T761	-2.19201	0.351811	-14.3448	1.44414e-17	1.59186e-15	29.9031
NICN1_S142	-2.63748	0.41069	-13.4927	1.35306e-17	1.52129e-15	29.8993
ANK2_S2701	-2.84066	0.447257	-14.7605	1.52704e-17	1.62997e-15	29.8733
KBTBD11_S510	-3.45988	0.494049	-13.6257	1.43335e-17	1.59035e-15	29.8565
PRKCG_S330	-3.96305	0.698	-13.6147	1.47601e-17	1.59405e-15	29.8274
ADCY2_S472	-2.95213	0.36169	-13.4653	1.45834e-17	1.59405e-15	29.825
VPS13A_T1418	-3.26754	0.478095	-13.4619	1.47201e-17	1.59405e-15	29.8158
DLGAP1_S383	-3.34945	0.597619	-13.4589	1.48393e-17	1.59405e-15	29.8078
EIF4G3_S1445	-1.64336	0.375452	-13.4266	1.62128e-17	1.71967e-15	29.7199
PLEKHA5_S613	-2.11257	0.256238	-13.411	1.69213e-17	1.78327e-15	29.6775
CADPS2_S1302	-3.10424	0.506286	-13.4088	1.70238e-17	1.78327e-15	29.6715
BCLAF3_S139	2.91682	-0.357439	13.5476	1.76625e-17	1.83876e-15	29.6513
ANK2_T3797	-3.07512	0.6055	-13.3831	1.82698e-17	1.89031e-15	29.6014
ALDOC_S45	-3.238	0.33919	-13.3647	1.92174e-17	1.97622e-15	29.5512
TRIM32_S328	-2.43632	0.327524	-13.3363	2.07783e-17	2.12379e-15	29.4737
MAP1B_S336	-2.58991	0.386405	-13.3256	2.14018e-17	2.17434e-15	29.4444
SRCIN1_S53	-2.51315	0.547381	-13.2654	2.52612e-17	2.55108e-15	29.2799
CAMSAP2_S931	-2.03574	0.403381	-13.2589	2.57252e-17	2.58247e-15	29.2618
KCNC1_S468	-3.01152	0.516056	-14.2734	2.80287e-17	2.76435e-15	29.2526
NEFM_S559	-4.45022	0.735952	-13.2538	2.60843e-17	2.60303e-15	29.248
DGKB_S123	-3.67519	0.831238	-13.2367	2.73473e-17	2.71301e-15	29.2011
GFOD1_T283	-2.54809	0.451275	-13.5259	2.85705e-17	2.78521e-15	29.1889
DNAJC5_S12	-3.58188	0.582333	-13.2211	2.85541e-17	2.78521e-15	29.1582
MDH2_T213	-2.4908	0.500147	-14.6598	3.25353e-17	3.11765e-15	29.1412
DCTN1_S105	-3.27783	0.744119	-13.2101	2.9436e-17	2.8531e-15	29.128
TBCD_S805	-2.27478	0.407786	-13.1875	3.13422e-17	3.02049e-15	29.0658
ABRAXAS2_S368	-3.55767	0.6505	-15.1283	3.6365e-17	3.36976e-15	29.0559
MAPT_S46	-4.46868	0.728119	-13.1674	3.31394e-17	3.15761e-15	29.0104
AAK1_T620	-3.05056	0.715357	-13.1555	3.42479e-17	3.2449e-15	28.9778
AMPH_S276	-3.35662	0.821881	-13.1454	3.52228e-17	3.31862e-15	28.9499
AJM1_S499	-2.58429	0.4605	-14.1363	3.8726e-17	3.54954e-15	28.9431
MYO5A_S600	-3.18289	0.548381	-13.1357	3.61849e-17	3.36976e-15	28.9231
MLF2_S238	-2.39966	0.612333	-13.134	3.63607e-17	3.36976e-15	28.9183
CNTNAP2_S1306	-3.8176	0.902073	-13.2667	3.76654e-17	3.47118e-15	28.898
SERBP1_S25	2.61545	-0.383921	13.7343	4.0252e-17	3.66946e-15	28.8774
TANC2_S404	-3.45409	0.69725	-14.0971	4.24976e-17	3.85165e-15	28.8433
CLTB_T187	-3.26123	0.514974	-13.7107	4.27073e-17	3.85165e-15	28.8188
TGFBRAP1_S855	-2.30918	0.411976	-13.0659	4.39441e-17	3.94211e-15	28.7303
TRIM3_S7	-1.5722	0.330143	-13.0572	4.50158e-17	4.01535e-15	28.7063
ADGRL1_S1129	-3.08864	0.659214	-13.0555	4.52366e-17	4.01535e-15	28.7015
CNKSR2_S702	-3.32401	0.786514	-14.2236	5.18702e-17	4.41813e-15	28.6685
IQSEC2_S627	-2.96465	0.57519	-13.0397	4.72775e-17	4.17196e-15	28.6577
BCKDHA_S337	-2.84079	0.452619	-13.0367	4.7667e-17	4.17196e-15	28.6495
EIF4B_S509	-2.67084	0.654262	-13.0361	4.77432e-17	4.17196e-15	28.6479
C2CD2L_S358	-3.65485	0.366342	-13.6386	5.12148e-17	4.40682e-15	28.6392
EPB41L3_T706	-5.49636	0.910762	-13.0316	4.83532e-17	4.20349e-15	28.6353
TMEM163_S61	-3.74187	0.724071	-13.0297	4.86159e-17	4.20466e-15	28.6299
COBL_S191	-3.13512	0.58603	-14.65	5.69894e-17	4.75805e-15	28.6024
BCAS3_S745	-2.97313	0.478944	-13.99	5.48144e-17	4.64545e-15	28.6002
SPTAN1_S2071	-2.88979	0.535119	-13.0065	5.18689e-17	4.41813e-15	28.5656
CAMK2B_T400	-4.09442	0.646667	-13.4378	5.52094e-17	4.65553e-15	28.5488
BSN_S2637	-3.58222	0.659	-13.4284	5.656e-17	4.74569e-15	28.5248
PCLO_S1894	-3.91055	0.704095	-12.9699	5.7458e-17	4.77354e-15	28.464
C2CD5_S249	-2.3409	0.427833	-12.9481	6.10741e-17	5.04909e-15	28.4034
HTT_S2941	-2.67683	0.509514	-14.1067	6.7981e-17	5.51202e-15	28.4017
KIAA1211L_S356	-2.61077	0.575571	-12.9455	6.15065e-17	5.06003e-15	28.3964
KCNA2_S441	-4.44973	0.892786	-12.9189	6.62699e-17	5.42545e-15	28.3223
NBEA_S1529	-2.74997	0.58531	-12.9168	6.6678e-17	5.43249e-15	28.3162
44080_S388	-3.78807	0.600472	-13.8494	7.6725e-17	6.01845e-15	28.2681
CIR1_S202	1.89485	-0.198524	12.8886	7.21524e-17	5.82225e-15	28.2378
DESI1_S25	-2.2277	0.535333	-12.8859	7.27103e-17	5.83933e-15	28.2302
GNG2_T52	-3.04734	0.600333	-13.3134	7.63084e-17	6.01374e-15	28.2278
SGIP1_T272	-3.80577	0.698833	-13.8314	8.01154e-17	6.22824e-15	28.2254
TRIM3_S427	-1.82776	0.485238	-12.8777	7.44088e-17	5.94741e-15	28.2073
SGIP1_S497	-3.39016	0.553524	-12.8743	7.51254e-17	5.97637e-15	28.1977
SAMD14_S173	-2.84637	0.654119	-12.8717	7.56692e-17	5.99136e-15	28.1906
KIAA1211L_S168	-3.58752	0.528317	-12.9903	8.0138e-17	6.22824e-15	28.1485
GRIN2A_S890	-3.43158	0.629105	-13.4267	8.76427e-17	6.74929e-15	28.1079
CAMKK2_S495	-2.65245	0.485595	-12.8318	8.46635e-17	6.54977e-15	28.079
NSF_S106	-3.50867	0.639692	-13.2533	8.93006e-17	6.8457e-15	28.0718
RPTOR_S722	2.23383	-0.365447	13.3646	1.02699e-16	7.76688e-15	27.951
SPTBN1_S2138	-2.05994	0.39681	-12.7789	9.82785e-17	7.49985e-15	27.9309
EIF3C_S9	-3.8553	0.8955	-12.7716	1.00338e-16	7.62249e-15	27.9103
IMMT_S350	-3.67996	0.4888	-13.8928	1.11966e-16	8.3553e-15	27.9093
CNKSR2_T339	-3.10118	0.569472	-13.6843	1.14188e-16	8.4464e-15	27.8753
SGIP1_S339	-2.62775	0.585452	-12.7556	1.04949e-16	7.90164e-15	27.8656
NCAM2_S811	-3.33505	0.612048	-12.7514	1.06215e-16	7.9614e-15	27.8537
APEH_S187	-2.74503	0.45719	-12.7267	1.13896e-16	8.4464e-15	27.7844
SMCR8_S790	-3.15937	0.459857	-12.7061	1.20752e-16	8.89291e-15	27.7263
GLUL_T328	-5.0458	0.853707	-12.8234	1.26988e-16	9.31153e-15	27.6914
SPAG9_S251	2.24087	-0.34259	13.1028	1.3262e-16	9.68242e-15	27.6793
UGP2_S434	-3.49809	0.524378	-13.4137	1.408e-16	1.02353e-14	27.6535
GABRA3_S442	-3.74397	0.524575	-12.9211	1.43699e-16	1.04012e-14	27.5893
HK1_S924	-3.58575	0.6294	-13.7492	1.56988e-16	1.11767e-14	27.5698
SPHK2_S107	-1.99484	0.368071	-12.6341	1.48094e-16	1.06735e-14	27.5235
ANK2_S1203	-3.27325	0.561686	-13.7237	1.66725e-16	1.15713e-14	27.5105
FAM53C_S299	2.47421	-0.530553	13.1888	1.61234e-16	1.1283e-14	27.5046
CHMP6_S119	-2.45841	0.386525	-12.8835	1.59088e-16	1.12053e-14	27.4885
CACNA1A_S793	-3.69509	0.606175	-12.8827	1.59459e-16	1.12053e-14	27.4862
DNM1_S347	-2.60536	0.450929	-12.614	1.568e-16	1.11767e-14	27.4667
PPP1R7_S24	-2.40345	0.570905	-12.6134	1.57064e-16	1.11767e-14	27.4651
IQSEC2_S228	-3.87837	0.757441	-13.899	1.80419e-16	1.23189e-14	27.453
ARHGEF2_S956	-1.8473	0.374214	-12.6089	1.59072e-16	1.12053e-14	27.4524
STX1A_T23	-4.28126	0.621929	-12.5968	1.64684e-16	1.14769e-14	27.418
CEP170B_S972	-3.28503	0.546051	-12.993	1.77257e-16	1.21522e-14	27.3913
RASGRP2_S391	-2.08444	0.430333	-12.5841	1.70744e-16	1.18016e-14	27.3821
PHB2_S91	-2.4948	0.440943	-13.6651	1.91527e-16	1.27662e-14	27.3791
OXR1_Y147	-4.32688	0.738088	-13.8667	1.94306e-16	1.28508e-14	27.3728
ADD1_S662	-4.3204	0.883286	-12.5732	1.76089e-16	1.21214e-14	27.3514
PPP2R1A_S122	-2.448	0.524923	-12.9624	1.92269e-16	1.27662e-14	27.3106
TBC1D24_S480	-2.47116	0.257262	-12.5557	1.85117e-16	1.25887e-14	27.3017
SLC4A10_S89	-4.93669	0.381286	-12.5485	1.88946e-16	1.27518e-14	27.2814
HCN1_T41	-3.64299	0.572429	-12.5481	1.89194e-16	1.27518e-14	27.2801
GPI_S61	-2.50459	0.387333	-12.5456	1.9052e-16	1.27518e-14	27.2732
ADD2_S613	-3.38996	0.643238	-12.5456	1.9054e-16	1.27518e-14	27.273
CACNA1A_T409	-2.39065	0.517683	-12.6681	1.95519e-16	1.28806e-14	27.2626
VPS13A_S1348	-3.13929	0.482143	-13.5914	2.28176e-16	1.46319e-14	27.2015
PPP3CB_S472	-2.84167	0.640929	-12.5153	2.07767e-16	1.36342e-14	27.187
PSMD1_T273	-2.14742	0.503738	-12.5076	2.12368e-16	1.38821e-14	27.1653
SV2B_S25	-5.21585	0.941537	-12.6298	2.17552e-16	1.41661e-14	27.1565
IMMT_S103	-2.27574	0.216848	-13.9763	2.50448e-16	1.57605e-14	27.136
HDGFL3_T110	-3.0217	0.557476	-12.4885	2.2429e-16	1.44961e-14	27.111
GOLPH3_S36	2.73678	-0.370119	12.4884	2.2434e-16	1.44961e-14	27.1107
TTC7B_S289	-4.00045	0.454585	-12.6094	2.30319e-16	1.47134e-14	27.0999
IQSEC2_S393	-3.28535	0.491429	-12.4828	2.27951e-16	1.46319e-14	27.0949
QDPR_S223	-2.38624	0.491762	-12.4636	2.40859e-16	1.53286e-14	27.0401
SHANK3_S483	-2.93702	0.532119	-12.4619	2.41996e-16	1.53431e-14	27.0354
AJM1_S109	-2.06801	0.291357	-12.4513	2.4947e-16	1.57577e-14	27.0052
GDI2_S61	-2.59345	0.449952	-12.4462	2.53106e-16	1.58685e-14	26.9908
STXBP1_S89	-4.33853	0.850886	-13.4992	2.8425e-16	1.76e-14	26.9889
CNOT10_S581	-2.86825	0.801438	-14.1334	2.97864e-16	1.82127e-14	26.9879
PCLO_S1538	-5.40963	1.21328	-14.1255	3.02991e-16	1.83152e-14	26.9711
44079_S225	-3.65532	0.713405	-12.4255	2.68625e-16	1.67791e-14	26.9317
RAB8A_S181	-2.81689	0.609343	-13.4764	3.00215e-16	1.82127e-14	26.9312
EPB41L4B_S782	-4.06803	0.675825	-12.6698	2.84898e-16	1.76e-14	26.911
RTN1_S330	-4.32074	0.619763	-12.9501	2.99316e-16	1.82127e-14	26.8919
TBR1_S641	-2.75703	0.590095	-12.4061	2.83986e-16	1.76e-14	26.8764
RTN2_S227	-3.26528	0.584212	-13.8522	3.30767e-16	1.97815e-14	26.8626
GOLGA4_S93	2.1471	-0.409214	12.393	2.94856e-16	1.81487e-14	26.8391
HNRNPA2B1_S102	-2.96289	0.670571	-12.3886	2.98589e-16	1.82127e-14	26.8266
VPS53_T382	-3.32617	0.518634	-12.5037	3.09754e-16	1.86571e-14	26.8054
MAP1A_S121	-3.3285	0.615909	-13.8135	3.60868e-16	2.11384e-14	26.7838
MAP1A_S2074	-2.25286	0.404119	-12.3715	3.13629e-16	1.88233e-14	26.7777
KIF21A_S1271	-2.91451	0.697152	-13.8047	3.68082e-16	2.13881e-14	26.7575
PKP4_S427	-2.80679	0.560154	-12.7404	3.47657e-16	2.05834e-14	26.7224
TTC7B_S625	-4.03165	0.646868	-12.8834	3.56276e-16	2.10091e-14	26.7193
VIPAS39_S121	2.02325	-0.212857	12.3379	3.45478e-16	2.05834e-14	26.6816
RTN4_S739	-4.01281	0.562524	-12.3356	3.47837e-16	2.05834e-14	26.6748
HECTD4_S1781	-3.02974	0.526714	-12.3227	3.60975e-16	2.11384e-14	26.6379
PRRT2_S90	-3.41556	0.787571	-12.3207	3.63057e-16	2.11867e-14	26.6322
THY1_Y74	-3.29506	0.550357	-12.315	3.69045e-16	2.13881e-14	26.6159
CYCS_S48	-2.59899	0.507912	-13.5322	4.21632e-16	2.37028e-14	26.6147
MESD_S88	-2.01078	0.275108	-12.9949	4.05407e-16	2.31769e-14	26.6067
AKAP12_S566	-2.76347	0.49881	-12.3078	3.7676e-16	2.17605e-14	26.5954
MARCKS_S131	-3.20794	0.464462	-12.6888	3.99266e-16	2.29816e-14	26.5849
PTPN4_S392	-2.57328	0.42525	-12.5364	4.1111e-16	2.32664e-14	26.5473
FXYD7_S56	-4.3537	0.726659	-12.4112	4.01896e-16	2.30543e-14	26.5466
DDAH1_S261	-3.06994	0.2543	-12.5312	4.16973e-16	2.35192e-14	26.5333
PPM1A_S208	-2.80387	0.461472	-13.1255	4.49293e-16	2.48437e-14	26.5198
C2CD2L_Y407	-1.88664	0.336976	-12.2805	4.07646e-16	2.32262e-14	26.517
MARK2_S365	-2.56424	0.452905	-12.2787	4.09753e-16	2.32664e-14	26.5119
MDH2_S246	-2.21477	0.337086	-13.2967	4.62324e-16	2.54807e-14	26.508
GRIN2B_S917	-2.74705	0.573381	-12.2645	4.26932e-16	2.3921e-14	26.4711
ADAM22_S863	-3.49654	0.341833	-12.2624	4.29491e-16	2.39846e-14	26.4651
HSPBP1_S397	-1.75704	0.21369	-12.2594	4.33317e-16	2.41184e-14	26.4563
PSD3_S1011	-4.02368	0.554095	-12.2558	4.37791e-16	2.42873e-14	26.4461
ANK2_S1733	-4.40117	0.759829	-12.3555	4.70315e-16	2.58367e-14	26.3903
PRKAR2B_S83	-2.3949	0.571405	-12.225	4.78602e-16	2.62066e-14	26.3575
GSR_S178	-2.46962	0.356179	-12.5987	5.09015e-16	2.7603e-14	26.3437
CACNA1A_S753	-4.33284	0.570405	-12.2159	4.91395e-16	2.682e-14	26.3313
EEF1B2_S95	-1.77346	0.227452	-12.209	5.01315e-16	2.72732e-14	26.3114
CTTNBP2NL_S549	2.52832	-0.632216	12.8784	5.46253e-16	2.92462e-14	26.3114
ANK2_S2458	-5.34831	1.22803	-12.5858	5.26983e-16	2.83948e-14	26.3092
IQSEC2_S262	-3.32916	0.584	-12.5804	5.34731e-16	2.87205e-14	26.2947
MAP2_S1155	-2.673	0.576786	-12.2001	5.14287e-16	2.77995e-14	26.286
PCLO_S1549	-5.42453	0.835838	-12.858	5.75576e-16	3.07186e-14	26.2596
AJM1_S319	-3.75415	0.505658	-12.6897	5.92497e-16	3.1522e-14	26.2093
CADPS_S488	-2.74457	0.428795	-12.5398	5.96849e-16	3.16537e-14	26.1926
ANK2_S1596	-2.93775	0.506548	-12.1468	6.00364e-16	3.17402e-14	26.1321
GLUL_S19	-2.89713	0.714571	-12.1407	6.11e-16	3.22016e-14	26.1146
AKAP12_S1328	-3.37273	0.699316	-12.6477	6.62012e-16	3.46734e-14	26.1053
ANKS1B_S507	-2.08855	0.460944	-12.9542	6.88917e-16	3.54225e-14	26.0974
TANC2_S140	-2.94907	0.633289	-12.6435	6.69315e-16	3.49473e-14	26.0944
MAP1B_S1262	-2.56162	0.363857	-12.1228	6.43599e-16	3.3814e-14	26.0629
PSD_S87	-2.61977	0.535795	-12.4873	6.8808e-16	3.54225e-14	26.0441
MDH2_S310	-3.97678	0.309824	-13.2765	7.68999e-16	3.89465e-14	26.0181
SHANK3_Y122	-3.83148	0.827214	-12.107	6.73905e-16	3.50784e-14	26.0172
SYNGAP1_S371	-3.62587	0.683	-13.6848	7.95723e-16	3.99401e-14	26.0128
TOP2B_S1375	2.32497	-0.291238	12.1049	6.78112e-16	3.51888e-14	26.011
MDH1_S241	-3.02983	0.62231	-12.1011	6.85663e-16	3.54225e-14	26
BRAF_S729	-2.33737	0.502714	-12.0906	7.06763e-16	3.62296e-14	25.9698
SYNGAP1_S825	-2.93118	0.564658	-12.5937	7.63727e-16	3.87959e-14	25.9636
RTN4_S738	-3.53959	0.722611	-12.8896	8.10225e-16	4.04274e-14	25.9367
SLC24A2_S336	-3.26267	0.53281	-12.0741	7.41755e-16	3.79082e-14	25.9218
SGTA_T81	-2.98423	0.567357	-12.0725	7.45206e-16	3.79695e-14	25.9171
SNCB_S72	-3.20827	0.420158	-12.5738	8.05097e-16	4.02907e-14	25.9113
SPTAN1_S1479	-2.63777	0.36469	-12.0573	7.78933e-16	3.93315e-14	25.8731
CNKSR2_S908	-2.66734	0.507452	-12.0521	7.90836e-16	3.98133e-14	25.858
PGBD5_S60	-2.88995	0.710857	-13.0248	8.95132e-16	4.4271e-14	25.8542
ANKRD24_S354	-2.49467	0.563395	-12.5508	8.55862e-16	4.25785e-14	25.8439
BNIP3_S157	-3.12294	0.398629	-13.0092	9.29963e-16	4.51983e-14	25.8164
FAM171A2_S372	-2.70413	0.327528	-12.8397	9.18629e-16	4.47765e-14	25.8137
NUDC_S260	-1.99298	0.447811	-12.6799	9.11028e-16	4.46548e-14	25.8046
PSD3_S1013	-3.35215	0.697167	-12.0202	8.67827e-16	4.30468e-14	25.7656
NDEL1_S194	-2.73958	0.518421	-12.5117	9.49609e-16	4.57576e-14	25.7476
ALDOC_S36	-4.44352	0.466333	-12.0077	9.00229e-16	4.43929e-14	25.7292
JPH1_S157	-3.37506	0.578833	-12.0055	9.06081e-16	4.45512e-14	25.7227
ATG9A_S18	-1.58729	0.240286	-12.0027	9.13483e-16	4.46548e-14	25.7146
MAP1A_S114	-3.73576	0.380095	-11.9953	9.33271e-16	4.52288e-14	25.6933
RPTOR_S887	-1.71936	0.361071	-11.9928	9.4027e-16	4.54374e-14	25.6859
BSN_T1092	-2.9127	0.580118	-13.1302	1.08812e-15	5.12603e-14	25.6759
ATP6V0D1_S283	-2.38071	0.536795	-12.3455	1.01211e-15	4.83651e-14	25.6606
PRKCA_T113	-3.40587	0.571344	-13.5208	1.1461e-15	5.28115e-14	25.6589
PCYT2_T359	-2.01288	0.349056	-12.7744	1.08319e-15	5.11709e-14	25.6491
KIAA1549L_S1637	-1.82814	0.241906	-13.5177	1.15389e-15	5.30255e-14	25.6471
CRBN_S434	-3.09086	0.311357	-11.9721	9.98978e-16	4.79993e-14	25.6256
TCOF1_S484	-4.06807	0.852686	-12.9269	1.1379e-15	5.27219e-14	25.617
ANK2_S2642	-3.22664	0.425317	-12.0813	1.02625e-15	4.88918e-14	25.6145
ZC3HAV1_S335	2.62307	-0.499238	11.9675	1.01233e-15	4.83651e-14	25.6124
TIAL1_S295	-1.87239	0.423794	-13.1009	1.16704e-15	5.32195e-14	25.6081
DMAP1_S454	3.18883	-0.638756	12.0628	1.08222e-15	5.11709e-14	25.572
MAPRE3_S162	-3.45297	0.634619	-11.9512	1.06189e-15	5.04472e-14	25.5649
GPR155_S741	-3.23151	0.613333	-12.3061	1.12717e-15	5.23684e-14	25.5536
EPB41L3_T703	-5.21356	1.0495	-12.7376	1.18882e-15	5.38965e-14	25.5519
ANKRD13D_S552	-3.44432	0.716415	-12.0539	1.11023e-15	5.18673e-14	25.5362
TRAPPC8_S971	-2.38034	0.559619	-11.9403	1.09626e-15	5.14997e-14	25.5332
UHRF1BP1_S928	-3.30013	0.661182	-13.2571	1.28577e-15	5.78256e-14	25.526
CTNNA2_S640	-1.79017	0.0682143	-11.9378	1.1045e-15	5.17426e-14	25.5258
GRAMD1B_S557	-2.90958	0.38622	-12.05	1.12266e-15	5.23029e-14	25.5252
GAP43_S132	-3.28401	0.579237	-12.4202	1.21185e-15	5.4793e-14	25.5058
PLCB1_S582	-3.87372	0.434525	-12.1583	1.17604e-15	5.34609e-14	25.5045
PIP5KL1_S313	-4.30399	0.789075	-12.1609	1.16758e-15	5.32195e-14	25.5021
LMTK3_S261	-2.54269	0.450286	-11.9264	1.14207e-15	5.27699e-14	25.4925
SPTBN1_S1652	-3.11903	0.202351	-12.5525	1.26818e-15	5.71867e-14	25.4767
CPNE5_S587	-2.64822	0.532476	-11.9197	1.16467e-15	5.32195e-14	25.473
STMN3_S65	-4.15609	0.716611	-12.6822	1.36806e-15	6.07165e-14	25.4203
ABR_S312	-2.50183	0.288	-12.3828	1.33937e-15	5.97579e-14	25.4065
NRCAM_S1242	-3.59672	0.405737	-12.3658	1.40178e-15	6.18875e-14	25.3614
CACNA1E_S19	-3.72888	0.734812	-13.388	1.54322e-15	6.63939e-14	25.3609
STMN3_S81	-4.2947	0.509929	-11.8805	1.30673e-15	5.85517e-14	25.3585
SPAG9_S730	2.15804	-0.418286	11.8799	1.30886e-15	5.85517e-14	25.3569
KIFC2_S612	-2.83184	0.486083	-12.6544	1.46817e-15	6.41466e-14	25.3505
YWHAG_S215	-2.43501	0.388686	-12.812	1.51027e-15	6.56461e-14	25.3363
CAMK2A_S275	-4.90307	0.674476	-11.8709	1.34391e-15	5.98022e-14	25.3306
ANK2_S2624	-3.47425	0.701	-13.1703	1.57265e-15	6.67513e-14	25.3275
IGSF9B_S797	-2.88903	0.630364	-13.162	1.60363e-15	6.74443e-14	25.3083
DLAT_S475	-4.42278	0.597778	-12.6366	1.5362e-15	6.62609e-14	25.3057
AP2A1_S518	-2.22101	0.453476	-11.8566	1.40165e-15	6.18875e-14	25.2887
PRKCB_S206	-4.05259	0.607361	-12.6282	1.56915e-15	6.67513e-14	25.2818
YWHAG_S71	-2.63331	0.47719	-11.8505	1.42702e-15	6.28372e-14	25.2709
ADD1_S355	-2.89803	0.4582	-12.0744	1.48879e-15	6.48796e-14	25.2705
GOT1_T140	-2.90315	0.697286	-11.8486	1.43515e-15	6.30309e-14	25.2652
TTC7B_S681	-4.58054	0.912286	-12.7813	1.62956e-15	6.81948e-14	25.2624
ALDOA_S90	-3.03907	0.372381	-11.8445	1.45228e-15	6.36175e-14	25.2534
GAP43_S166	-3.03803	0.560325	-12.0661	1.52424e-15	6.59134e-14	25.2471
ADGRB2_S1527	-3.48677	0.474289	-12.317	1.59751e-15	6.7355e-14	25.2317
ATG2B_S735	-2.33922	0.482382	-12.9353	1.73487e-15	7.13625e-14	25.2156
SHC2_S428	-2.68192	0.528333	-11.8297	1.51736e-15	6.57848e-14	25.2098
PEBP1_S54	-3.15571	0.525738	-11.8214	1.55491e-15	6.67266e-14	25.1855
PRKAA1_S511	2.31519	-0.571143	11.8191	1.56538e-15	6.67513e-14	25.1788
PRAG1_S694	3.19447	-0.413167	11.8187	1.56697e-15	6.67513e-14	25.1778
MAP1A_S900	-4.55171	1.04153	-12.5869	1.74341e-15	7.1539e-14	25.1775
PRKCG_S326	-2.75679	0.580118	-12.9189	1.80481e-15	7.35221e-14	25.1766
GNAO1_S207	-3.65658	0.528784	-12.4365	1.71744e-15	7.09919e-14	25.176
MAP3K10_T558	-2.36227	0.443595	-11.8169	1.57528e-15	6.67513e-14	25.1725
PRRT2_T108	-4.25895	0.438905	-11.8123	1.59675e-15	6.7355e-14	25.1591
PALM2_S382	-2.39095	0.620952	-11.8094	1.61078e-15	6.75765e-14	25.1504
AHCYL1_S85	-3.69566	0.622077	-12.158	1.69299e-15	7.0326e-14	25.1491
TPI1_S249	-2.09977	0.234738	-11.8045	1.63408e-15	6.82147e-14	25.1361
PRKAR2B_S85	-2.67441	0.594786	-11.7971	1.66991e-15	6.95382e-14	25.1145
WIPF2_S175	-4.0227	0.753282	-12.1448	1.75575e-15	7.16966e-14	25.1129
AP2M1_S70	-3.45303	0.700238	-11.7892	1.70955e-15	7.08394e-14	25.0912
RTN1_T332	-3.38671	0.633571	-11.7845	1.73343e-15	7.13625e-14	25.0774
ABI2_S183	-1.72538	0.337452	-11.7808	1.7523e-15	7.16966e-14	25.0666
PRKCE_S350	-4.01149	0.935371	-12.704	1.97361e-15	7.90808e-14	25.0664
AJM1_S509	-2.57082	0.457171	-12.7001	1.99305e-15	7.96513e-14	25.0615
NCOR2_S1025	2.60705	-0.45739	11.8809	1.82657e-15	7.42292e-14	25.0523
PCLO_S4204	-3.75092	0.602231	-12.1211	1.87419e-15	7.57993e-14	25.048
DPYSL2_S397	-3.39548	0.53175	-12.5264	2.03446e-15	8.11139e-14	25.028
YWHAZ_S114	-2.69	0.591606	-13.0395	2.13403e-15	8.44846e-14	25.0265
ANK2_S2227	-5.54233	1.44237	-13.2331	2.18942e-15	8.60714e-14	25.0194
ZZEF1_T2074	-1.90891	0.35681	-11.7623	1.85063e-15	7.50261e-14	25.0123
KIAA1549_S1926	-3.16776	0.500194	-12.5001	2.17628e-15	8.57547e-14	24.9614
PKM_S323	-2.89555	0.431595	-11.7438	1.9544e-15	7.87664e-14	24.958
MADD_S1239	-3.51498	0.597119	-11.7434	1.9569e-15	7.87664e-14	24.9567
WDR44_S262	2.23929	-0.501	11.7405	1.97409e-15	7.90808e-14	24.948
ARHGAP12_S103	2.60603	-0.534738	11.7274	2.05161e-15	8.16047e-14	24.9097
ATP1A1_S484	-4.16499	0.590829	-11.8351	2.08528e-15	8.27489e-14	24.9092
SCAF11_S816	2.82793	-0.437294	12.8002	2.40377e-15	9.2556e-14	24.8937
DLGAP1_S356	-3.86612	0.739686	-12.6304	2.37039e-15	9.16895e-14	24.8897
PAK5_S602	-3.68364	0.671073	-11.8258	2.14201e-15	8.46019e-14	24.8825
UHRF1BP1L_S953	2.12798	-0.322763	12.1766	2.33217e-15	9.04186e-14	24.8563
ATP1A1_S47	-3.51897	0.453762	-11.7029	2.20608e-15	8.65245e-14	24.8374
AKAP13_S2713	2.42797	-0.333643	11.7009	2.2191e-15	8.68334e-14	24.8316
ADD3_S585	-3.26303	0.469524	-11.6953	2.25634e-15	8.80859e-14	24.815
NAA10_S205	-2.15572	0.355868	-12.1576	2.4549e-15	9.40952e-14	24.8054
MAGED2_T72	1.92913	-0.22781	11.6858	2.32089e-15	9.03037e-14	24.787
SGIP1_S323	-4.24594	0.677571	-11.6853	2.32385e-15	9.03037e-14	24.7857
ARPC5L_S64	-4.32848	0.787658	-12.1421	2.56013e-15	9.76846e-14	24.7637
ANK3_S623	-3.63561	0.711786	-11.6753	2.39366e-15	9.23778e-14	24.7562
SPTBN1_S2323	-3.21412	0.632487	-12.0139	2.52104e-15	9.64111e-14	24.7531
GDAP1_S11	-3.0839	0.406714	-11.6702	2.43077e-15	9.33825e-14	24.7409
CAPN5_T44	-3.35743	0.498235	-12.723	2.89893e-15	1.08645e-13	24.7088
PPP1R16B_S476	-3.55367	0.704073	-11.7623	2.57526e-15	9.80401e-14	24.6992
GOLGA4_S120	2.65495	-0.364686	12.551	2.891e-15	1.08589e-13	24.6936
RAP2A_T151	-4.05277	0.478909	-12.8929	3.01158e-15	1.11773e-13	24.6867
VPS50_S559	-1.70169	0.323564	-11.9882	2.70794e-15	1.02169e-13	24.682
CIC_S2282	3.07357	-0.536091	12.8924	3.01552e-15	1.11773e-13	24.679
TPPP_S164	-3.27715	0.557	-12.8884	3.04419e-15	1.12553e-13	24.6761
G3BP2_S225	-2.38988	0.393905	-11.6405	2.65458e-15	1.00832e-13	24.6533
UBAC1_S332	-3.06183	0.5595	-11.6397	2.6606e-15	1.00834e-13	24.651
CAP2_T307	-2.60413	0.572105	-12.0986	2.88044e-15	1.08434e-13	24.6467
STK25_S231	-1.97497	0.306238	-11.6373	2.6799e-15	1.01338e-13	24.6438
FAM171A2_S476	-2.69356	0.499486	-12.5287	3.05658e-15	1.12553e-13	24.6377
STMN3_S73	-2.15359	0.439297	-12.2182	3.05126e-15	1.12553e-13	24.6059
ZC3HC1_S407	2.95645	-0.659415	11.7122	2.97935e-15	1.11165e-13	24.5664
CALM2_S130	-2.41477	0.493605	-12.0672	3.13652e-15	1.14745e-13	24.5622
BASP1_S219	-3.00241	0.683071	-11.606	2.94102e-15	1.09979e-13	24.5513
CAMK2A_S342	-3.84356	0.705971	-12.4922	3.35011e-15	1.21505e-13	24.5468
ANK2_S2226	-3.55968	0.699194	-12.3312	3.36002e-15	1.21602e-13	24.5319
TRAPPC9_S1051	-2.18478	0.512167	-11.5987	3.00504e-15	1.11773e-13	24.5299
TESPA1_S454	-4.70457	0.870366	-11.6992	3.09385e-15	1.1343e-13	24.5166
CISD1_T88	-4.57901	0.532095	-11.5901	3.08359e-15	1.133e-13	24.5042
BTBD10_S127	-1.8535	0.4807	-11.7943	3.29219e-15	1.19661e-13	24.4825
CTNND2_S1060	-1.68362	0.306048	-11.5806	3.1718e-15	1.15785e-13	24.4761
SFN_S64	-2.09878	0.370071	-11.5759	3.21632e-15	1.17156e-13	24.4622
EML3_S157	3.26144	-0.797231	11.9008	3.45301e-15	1.24198e-13	24.4598
MTFR1L_S238	2.23485	-0.472395	12.0289	3.48097e-15	1.24378e-13	24.4588
CTNND1_T916	3.8001	-0.458027	12.1601	3.55971e-15	1.26923e-13	24.4538
LMTK3_S980	-3.00304	0.555357	-11.5521	3.45262e-15	1.24198e-13	24.3917
TAOK1_S965	2.27147	-0.305714	11.552	3.45384e-15	1.24198e-13	24.3913
ANK2_S1461	-2.35309	0.306476	-11.5511	3.46296e-15	1.24261e-13	24.3887
CLTC_S67	-2.94439	0.518214	-11.5495	3.47948e-15	1.24378e-13	24.384
MBP_T214	-3.88369	0.515103	-11.8784	3.67617e-15	1.30799e-13	24.3779
AJM1_S448	-2.29274	0.286316	-11.9929	3.83981e-15	1.36047e-13	24.3614
SPTBN4_S1752	-3.98391	0.852231	-11.8572	3.89967e-15	1.3759e-13	24.3192
ALDOA_T91	-3.08812	0.544286	-11.5165	3.83893e-15	1.36047e-13	24.2861
JPH3_S420	-3.55756	0.623927	-11.6168	3.93556e-15	1.38237e-13	24.2772
ADAM22_S924	-4.16687	0.745143	-11.5113	3.89899e-15	1.3759e-13	24.2707
HSPH1_S811	-2.0754	0.394214	-11.5103	3.91108e-15	1.37704e-13	24.2676
STK3_S413	2.1567	-0.386786	11.5076	3.94261e-15	1.38237e-13	24.2596
CLEC2L_S32	-3.511	0.643357	-11.5058	3.96422e-15	1.38707e-13	24.2541
DNAJA2_S123	-2.05143	0.423714	-11.5019	4.01039e-15	1.40031e-13	24.2426
NDRG3_S335	-2.02632	0.403054	-12.0769	4.44108e-15	1.5404e-13	24.2334
ADAM22_S839	-3.04378	0.578366	-11.5948	4.19674e-15	1.4614e-13	24.2132
DGKH_S1075	-1.9335	0.375553	-11.9368	4.47565e-15	1.54676e-13	24.2093
NEFH_T501	-3.63834	0.521524	-11.4862	4.20267e-15	1.4614e-13	24.196
CNNM2_S749	-2.40324	0.518571	-12.3482	4.81541e-15	1.63734e-13	24.1871
MDH1_S111	-3.36447	0.561425	-11.689	4.44813e-15	1.5404e-13	24.1836
PITPNM1_S300	-2.27668	0.408154	-11.8047	4.51699e-15	1.55707e-13	24.173
ANK2_S3833	-2.50298	0.459929	-11.4616	4.52395e-15	1.55707e-13	24.1227
AAK1_T674	1.78934	-0.392049	11.557	4.68809e-15	1.60487e-13	24.1161
DLGAP2_S741	-4.03979	0.613275	-11.669	4.71087e-15	1.60828e-13	24.1144
LARP1_S550	-2.093	0.48797	-12.6466	5.40273e-15	1.80788e-13	24.1098
ACIN1_S825	3.16478	-0.653833	11.4517	4.65959e-15	1.60049e-13	24.0933
HTT_S642	3.00849	-0.655071	11.4494	4.69139e-15	1.60487e-13	24.0865
CSDE1_S169	-2.4802	0.419714	-11.4468	4.72878e-15	1.61113e-13	24.0786
ROCK2_S425	-2.12794	0.280275	-11.6451	5.04467e-15	1.7084e-13	24.0586
KIAA1671_S1701	-2.36918	0.349667	-11.7625	5.08417e-15	1.71489e-13	24.0553
MAP1B_S1187	-3.14584	0.609048	-11.4298	4.97559e-15	1.6884e-13	24.028
CAMK2B_S395	-3.43862	0.763053	-11.8648	5.45026e-15	1.82017e-13	24.0136
DMXL1_S208	-3.61963	0.637119	-11.4236	5.06937e-15	1.71332e-13	24.0094
FAM49B_S117	-2.03822	0.405762	-11.4186	5.14489e-15	1.73191e-13	23.9946
ADD2_S596	-2.01279	0.259857	-11.4173	5.16524e-15	1.73529e-13	23.9907
SYNE1_S5875	-2.12237	0.27531	-11.4094	5.2902e-15	1.77374e-13	23.9669
PRKACB_S386	-1.66465	0.287952	-11.3898	5.60944e-15	1.86963e-13	23.9086
ADD2_S617	-5.95022	0.7622	-11.5924	5.87056e-15	1.93752e-13	23.9079
KBTBD11_S316	-3.35367	0.44739	-11.4864	5.76756e-15	1.91269e-13	23.8967
ANKS1B_S310	-3.57527	0.612333	-12.5567	6.69947e-15	2.16039e-13	23.8951
GLUD1_S227	-2.22297	0.387048	-11.3821	5.74099e-15	1.9097e-13	23.8855
PSD_S17	-3.31923	0.502053	-11.8174	6.2079e-15	2.029e-13	23.8844
APBA1_T305	-2.99018	0.701571	-11.3798	5.77987e-15	1.91269e-13	23.8788
RRAS2_S186	-1.88262	0.192024	-11.3796	5.784e-15	1.91269e-13	23.8781
CAMK2A_S332	-2.92665	0.638125	-12.7272	6.99386e-15	2.24242e-13	23.8711
GPI_S146	-2.33291	0.250333	-11.3712	5.93123e-15	1.95371e-13	23.8531
CAMK2A_T348	-3.92523	0.529333	-11.3641	6.05912e-15	1.99195e-13	23.8318
PALM_S64	-2.63259	0.408697	-12.5263	7.20684e-15	2.29761e-13	23.8252
STX1B_S10	-4.50796	0.709476	-11.3619	6.10051e-15	2.00165e-13	23.8251
GRIN2A_S882	-4.78495	0.985077	-11.6754	6.494e-15	2.11024e-13	23.8235
TANC2_S1530	-1.58568	0.367	-11.3566	6.19864e-15	2.029e-13	23.8092
COPS5_S24	-2.03009	0.357595	-11.9138	6.8697e-15	2.20744e-13	23.8004
LUC7L3_T238	3.68725	-0.840762	11.3525	6.27499e-15	2.04696e-13	23.797
DNAJC5_S15	-3.40644	0.593952	-11.3486	6.34965e-15	2.06732e-13	23.7852
TEX2_S809	-3.57628	0.6296	-11.5465	6.69959e-15	2.16039e-13	23.7767
NAXD_Y85	-3.66752	0.463878	-11.4452	6.5105e-15	2.11153e-13	23.7761
GNB2_S216	-3.68016	0.562771	-12.1769	7.43797e-15	2.36236e-13	23.7558
CUL9_S2436	-1.61357	0.296976	-11.3349	6.61601e-15	2.14163e-13	23.7443
UBA1_S835	-2.89521	0.55419	-11.3223	6.87168e-15	2.20744e-13	23.7065
SAP130_S709	2.32782	-0.444333	11.3154	7.01504e-15	2.24495e-13	23.686
ATP6V0A1_T367	-2.75548	0.514343	-12.1488	7.99164e-15	2.51612e-13	23.6846
FAF2_S355	-1.8526	0.380167	-11.3135	7.05499e-15	2.25345e-13	23.6803
MAGI2_S1017	-2.70347	0.442184	-11.7403	7.67606e-15	2.42883e-13	23.6736
SLC6A1_S591	-3.48911	0.556846	-11.6237	7.51367e-15	2.38192e-13	23.6666
BAG6_S1117	-2.30093	0.564238	-11.2981	7.38991e-15	2.35152e-13	23.6342
MAP1A_S527	-4.53078	0.831316	-11.7126	8.28563e-15	2.58907e-13	23.5977
SYNGAP1_S1204	-4.66143	0.878212	-12.4162	9.39667e-15	2.87613e-13	23.563
NCK1_S85	2.0363	-0.485048	11.2732	7.96631e-15	2.51595e-13	23.5594
ERC1_S55	2.58489	-0.438905	11.272	7.99668e-15	2.51612e-13	23.5556
AIDA_S162	-2.32823	0.433119	-11.2658	8.14745e-15	2.55878e-13	23.537
EIF3C_S182	-3.40682	1.18121	-11.2619	8.24405e-15	2.58431e-13	23.5253
RALGAPB_S359	-2.87755	0.494	-11.6859	8.9205e-15	2.74533e-13	23.5243
FAM208A_S1042	-2.05634	0.389857	-11.26	8.28995e-15	2.58907e-13	23.5197
ATP1A1_Y684	-3.24319	0.396114	-12.0824	9.47011e-15	2.89145e-13	23.5162
RIMS1_S420	-3.54435	0.441902	-11.3567	8.4549e-15	2.63085e-13	23.516
CCDC6_S52	-2.26923	0.356476	-11.258	8.34103e-15	2.60021e-13	23.5136
GNAO1_S62	-3.71197	0.520425	-11.452	8.8028e-15	2.71903e-13	23.5054
TUBB4A_T106	-2.72015	0.492243	-11.8035	9.24625e-15	2.83524e-13	23.5054
AKAP12_S569	-2.5661	0.411	-11.252	8.49424e-15	2.63822e-13	23.4955
ATP8A1_S29	-3.62034	0.759667	-11.251	8.52026e-15	2.64144e-13	23.4925
SIPA1L2_S148	-1.79402	0.349524	-11.2459	8.65082e-15	2.67699e-13	23.4773
OSBP_S193	-2.18412	0.345571	-11.2359	8.91769e-15	2.74533e-13	23.4471
STX1A_S64	-4.31823	0.899881	-11.2298	9.0811e-15	2.78967e-13	23.429
PAK1_T230	-2.50508	0.4705	-11.2156	9.48099e-15	2.89145e-13	23.3861
SRRM2_T1492	1.99893	-0.306857	11.2126	9.56667e-15	2.91231e-13	23.3771
HK1_S459	-4.73708	0.565057	-12.0273	1.09088e-14	3.25622e-13	23.3758
KCNC2_S57	-1.55522	0.162262	-11.2108	9.61882e-15	2.92291e-13	23.3717
KCNB1_T733	-3.54082	0.891121	-12.3289	1.16064e-14	3.42207e-13	23.3542
PLCL2_T584	-3.43412	0.594095	-11.2047	9.79828e-15	2.97209e-13	23.3533
GNAO1_S159	-4.06751	0.757256	-11.5101	1.03648e-14	3.11591e-13	23.3464
AKAP12_S554	-4.01002	0.56378	-11.2981	1.00569e-14	3.03959e-13	23.3432
UBA3_S377	-2.00285	0.319946	-11.7404	1.0965e-14	3.26721e-13	23.3361
PRKN_S131	-1.98558	0.442143	-12.0092	1.14265e-14	3.39275e-13	23.3298
BASP1_T36	-4.2614	0.620976	-11.1966	1.00421e-14	3.03959e-13	23.3288
PRRT2_S208	-3.99559	0.673167	-11.1918	1.01896e-14	3.07315e-13	23.3143
PFKM_S770	-2.07051	0.422952	-11.1913	1.02044e-14	3.07315e-13	23.3129
NBEA_S1011	-3.16911	0.468351	-11.7237	1.14741e-14	3.40091e-13	23.291
TNKS1BP1_S836	2.27676	-0.475786	11.1762	1.06822e-14	3.20561e-13	23.2673
KIAA1109_S1323	2.05888	-0.59531	11.1748	1.07265e-14	3.21318e-13	23.2632
RTN4_S440	-4.04525	0.631143	-11.1698	1.08917e-14	3.25622e-13	23.248
SIRT2_S53	-2.66567	0.517548	-11.1559	1.13576e-14	3.37824e-13	23.2063
RBBP6_S1328	1.7811	-0.289786	11.1499	1.1567e-14	3.42207e-13	23.1881
TRIM2_T398	-1.97712	0.307548	-11.1491	1.15969e-14	3.42207e-13	23.1855
GABARAPL2_S10	-3.54241	0.722452	-11.147	1.16694e-14	3.43464e-13	23.1793
PEBP1_S52	-3.05978	0.704667	-11.146	1.17066e-14	3.43957e-13	23.1761
MAP1B_S343	-2.04674	0.299405	-11.1424	1.1832e-14	3.47039e-13	23.1655
CYCS_T29	-3.40994	0.491429	-11.1404	1.19045e-14	3.48559e-13	23.1594
CAP2_S301	-4.11861	0.692286	-11.1347	1.21118e-14	3.54012e-13	23.1422
VPS13C_S842	-3.57784	0.817813	-12.4107	1.46852e-14	4.17649e-13	23.1385
CLEC2L_S55	-4.05218	0.645286	-11.9339	1.38727e-14	3.96548e-13	23.1373
C2CD2L_S374	-3.86123	0.783444	-11.7943	1.36832e-14	3.92462e-13	23.1333
ADD1_S358	-2.03711	0.310524	-11.1289	1.23282e-14	3.59713e-13	23.1246
IQSEC1_S197	-3.50137	0.570143	-11.1261	1.24324e-14	3.62128e-13	23.1162
PSD_S263	-3.59178	0.753878	-11.2189	1.27224e-14	3.69938e-13	23.1091
BSN_S1477	-4.64855	1.04535	-12.0624	1.483e-14	4.20351e-13	23.089
OSBP_S240	-1.9674	0.273405	-11.1159	1.28238e-14	3.72244e-13	23.0854
RALBP1_S48	-2.64405	0.431643	-11.1143	1.28884e-14	3.73476e-13	23.0803
EIF4ENIF1_S670	3.02651	-0.60981	11.1123	1.29646e-14	3.75039e-13	23.0745
DLG2_S170	-4.03399	0.969881	-11.1086	1.3112e-14	3.78528e-13	23.0632
SNAP91_S296	-3.46252	0.779119	-11.1081	1.31301e-14	3.78528e-13	23.0618
TKT_S264	-2.40462	0.418257	-11.9022	1.50555e-14	4.25828e-13	23.056
WDR7_S1456	-1.94194	0.378857	-11.1052	1.32498e-14	3.81196e-13	23.0528
SORBS3_S373	2.40256	-0.383833	11.1047	1.32678e-14	3.81196e-13	23.0515
ALDOA_S330	-2.29732	0.372071	-11.0939	1.37115e-14	3.92604e-13	23.0187
NELFB_S605	2.55422	-0.427	11.086	1.40423e-14	4.00716e-13	22.995
PHACTR1_S307	-3.48319	0.777095	-11.0811	1.42542e-14	4.06076e-13	22.98
PRKCG_S322	-3.68371	0.491294	-12.0146	1.67236e-14	4.64651e-13	22.9698
SLC8A1_S455	-3.13828	0.477273	-12.1672	1.72116e-14	4.74757e-13	22.9646
INPP5A_S356	-4.69265	0.449526	-11.4812	1.57531e-14	4.42794e-13	22.9593
SKP1_T131	-2.60078	0.327976	-11.0683	1.48196e-14	4.20351e-13	22.9413
SH3BP5L_S343	2.63589	-0.6376	11.8537	1.70679e-14	4.72661e-13	22.9315
BIN1_S298	-3.45249	0.687214	-11.0627	1.50738e-14	4.25828e-13	22.9244
CTTNBP2NL_S488	1.9392	-0.172683	11.1477	1.57277e-14	4.42794e-13	22.9131
MAP1A_S155	-2.10946	0.472452	-11.0584	1.52765e-14	4.30832e-13	22.9111
AJM1_S468	-2.43092	0.390282	-11.3512	1.62988e-14	4.55098e-13	22.8957
HSPH1_S559	-3.07431	0.73969	-11.0473	1.58e-14	4.43372e-13	22.8775
MGRN1_S524	-1.83163	0.295643	-11.0466	1.58352e-14	4.43533e-13	22.8753
PEX14_S44	-2.11021	0.249643	-11.0461	1.58583e-14	4.43533e-13	22.8739
AFAP1_S632	2.73799	-0.551744	11.3434	1.66643e-14	4.63768e-13	22.8736
CACNA1A_T2002	-3.3008	0.719079	-11.4492	1.72281e-14	4.74757e-13	22.8579
TMEM94_S246	-3.86832	0.487488	-11.1284	1.66615e-14	4.63768e-13	22.8405
FBXO41_T170	-3.15591	0.675156	-12.2738	2.03207e-14	5.46586e-13	22.8175
MAP1A_S896	-2.52851	0.560762	-11.0248	1.69181e-14	4.69283e-13	22.8094
C2CD5_S395	-2.46165	0.529308	-11.3118	1.82423e-14	4.98633e-13	22.7971
DLGAP1_S589	-2.88718	0.230395	-11.4224	1.85709e-14	5.06794e-13	22.7958
TNKS1BP1_T239	2.96345	-0.326795	11.303	1.87101e-14	5.09768e-13	22.7955
PUM2_S136	1.78534	-0.274119	11.0189	1.72264e-14	4.74757e-13	22.7914
PGM2L1_T173	-2.41685	0.356381	-11.0126	1.75623e-14	4.83178e-13	22.7722
STX1B_S14	-3.46352	0.699	-11.0078	1.78208e-14	4.89492e-13	22.7577
IQSEC1_S501	-2.80983	0.485833	-11.0048	1.79829e-14	4.93087e-13	22.7486
PRRT2_S100	-4.89502	1.10402	-11.0043	1.80102e-14	4.93087e-13	22.7471
STX7_S75	-2.94654	0.532529	-11.9073	2.19281e-14	5.84229e-13	22.7079
SYMPK_S1259	2.60672	-0.515816	11.385	2.06186e-14	5.53715e-13	22.6918
CEP170B_S988	-1.8285	0.380075	-11.1704	1.99997e-14	5.42592e-13	22.6897
CAMK4_S360	-4.16841	0.869308	-11.2775	2.01296e-14	5.44047e-13	22.6855
LMTK3_S677	-2.08308	0.416077	-11.276	2.02165e-14	5.45521e-13	22.6812
PLCB1_S501	-3.31421	0.411485	-12.0519	2.28366e-14	6.06519e-13	22.6792
DBNL_S24	-1.98224	0.419857	-10.9795	1.9426e-14	5.28418e-13	22.6718
NES_S1577	2.84849	-0.387452	10.9694	2.00356e-14	5.42592e-13	22.641
LIMK1_S210	-2.01031	0.338024	-10.9693	2.00436e-14	5.42592e-13	22.6406
OSBP_S190	-2.04654	0.411452	-10.9655	2.02751e-14	5.4623e-13	22.6292
PEX19_T236	-2.48364	0.373238	-10.9563	2.0853e-14	5.59119e-13	22.6012
MAP1B_S1258	-2.26515	0.378722	-11.5888	2.36515e-14	6.22282e-13	22.5997
SNCB_S64	-3.45204	0.619238	-10.9549	2.09445e-14	5.60681e-13	22.5968
SYP_Y81	-3.6498	0.648524	-10.9519	2.11403e-14	5.65025e-13	22.5875
ATG2B_S240	-2.43714	0.561881	-10.9437	2.1673e-14	5.78347e-13	22.5628
TBC1D10B_T135	-2.73921	0.408342	-11.3382	2.3517e-14	6.20678e-13	22.5611
HINT1_S45	-3.63014	0.687524	-10.9316	2.24922e-14	5.98314e-13	22.5258
DOCK9_S927	-2.92875	0.400875	-11.1111	2.3804e-14	6.25318e-13	22.5166
GRHPR_S272	-2.40517	0.434684	-11.3194	2.47945e-14	6.47304e-13	22.5085
CEP170B_S360	-2.19652	0.390256	-11.2155	2.40537e-14	6.29917e-13	22.5082
HDGFL3_S122	-2.74028	0.548244	-11.016	2.33285e-14	6.16669e-13	22.5053
BASP1_S194	-3.69568	0.746135	-11.4321	2.54271e-14	6.60752e-13	22.5004
SRCIN1_S64	-2.56028	0.464238	-10.9222	2.31513e-14	6.13783e-13	22.497
FCHO2_S403	2.23093	-0.277905	10.9217	2.31829e-14	6.13783e-13	22.4957
SLC6A15_S687	-2.96983	0.745195	-11.0127	2.35598e-14	6.20838e-13	22.4955
SYN1_S391	-3.63801	0.604463	-11.0087	2.38458e-14	6.25442e-13	22.4835
GNAO1_S135	-3.07353	0.507675	-11.0932	2.50861e-14	6.52898e-13	22.4644
CLEC2L_S50	-3.80414	0.159206	-11.8084	2.81848e-14	7.20208e-13	22.4594
RIMS2_S476	-2.26947	0.530286	-10.9042	2.4461e-14	6.3959e-13	22.4422
AP3D1_T778	-4.20032	0.9736	-11.6552	2.86182e-14	7.29072e-13	22.4274
WIPF3_S202	-2.37408	0.356762	-10.8983	2.49045e-14	6.49171e-13	22.4243
UBE2O_S98	-3.2831	0.539265	-11.7831	3.006e-14	7.60063e-13	22.3956
WDR47_S586	-2.4231	0.34469	-10.8884	2.56785e-14	6.66257e-13	22.3939
SPTBN1_S2169	-1.84283	0.266619	-10.8868	2.58038e-14	6.68482e-13	22.389
CCKBR_T496	-2.98656	0.654455	-11.932	3.07025e-14	7.73986e-13	22.3855
NES_S842	3.47465	-0.595143	10.8839	2.60347e-14	6.73427e-13	22.3801
KIAA1549L_S1333	-3.344	0.567571	-10.8798	2.63618e-14	6.80844e-13	22.3677
PLCB1_S417	-4.86441	0.612525	-11.061	2.75813e-14	7.08005e-13	22.355
PRKACA_S415	-2.08588	0.408429	-10.8742	2.68147e-14	6.91484e-13	22.3507
NCAM1_S806	-4.16616	0.8377	-11.0538	2.81744e-14	7.20208e-13	22.349
NPAT_S1303	2.11872	-0.426071	10.8731	2.69043e-14	6.92734e-13	22.3474
NEFM_T571	-4.24483	0.544	-10.8718	2.70118e-14	6.94442e-13	22.3434
CDH10_S784	-2.67884	0.474925	-11.0516	2.83573e-14	7.23517e-13	22.3426
EHD3_S349	-3.27148	0.776889	-11.4878	3.10119e-14	7.78298e-13	22.3205
DLGAP1_S362	-4.39431	0.509971	-11.7477	3.28986e-14	8.17136e-13	22.3062
KIF2A_S140	-3.00615	0.624024	-10.8584	2.81532e-14	7.20208e-13	22.3022
ABLIM2_S364	-3.44499	0.548231	-11.1397	2.99191e-14	7.57635e-13	22.2908
CIC_S1609	1.6511	-0.214595	10.8498	2.89056e-14	7.34599e-13	22.2759
MAP1A_S1675	-2.65611	0.4735	-10.8496	2.89222e-14	7.34599e-13	22.2754
CAMK2G_T287	-3.04047	0.403632	-11.2333	3.1604e-14	7.91978e-13	22.2673
CACNA1E_S14	-4.10787	0.708167	-10.841	2.96963e-14	7.53125e-13	22.2491
ANK2_S1879	-4.32575	0.714585	-10.9233	3.08235e-14	7.75878e-13	22.2279
ANK2_S2127	-4.73145	0.717429	-10.8334	3.04001e-14	7.67511e-13	22.2257
GAP43_S187	-4.20574	0.864805	-10.9216	3.09834e-14	7.78298e-13	22.2227
RABGEF1_S404	-2.30423	0.518	-11.211	3.36537e-14	8.33435e-13	22.2048
EPB41L3_S833	-2.88037	0.437235	-11.7083	3.63819e-14	8.90115e-13	22.1982
PRKCE_T710	-5.46361	0.7527	-11.005	3.25352e-14	8.11696e-13	22.1904
IQSEC1_S166	-2.52533	0.409947	-11.2054	3.4199e-14	8.44345e-13	22.1889
AVEN_S94	2.10368	-0.383919	11.3182	3.47951e-14	8.56671e-13	22.1887
TEX2_S295	3.69349	-0.790439	10.9036	3.27093e-14	8.14835e-13	22.185
KCNH7_S1189	-2.47986	0.461762	-10.8199	3.16863e-14	7.92863e-13	22.1845
NDRG3_S352	-3.71141	0.646	-10.8173	3.19358e-14	7.97923e-13	22.1766
NME1-NME2_S159	-2.15556	0.370861	-11.4281	3.64174e-14	8.90115e-13	22.1719
MDC1_T1198	-2.43554	0.497657	-11.5528	3.74308e-14	9.10925e-13	22.1515
NEFH_S503	-4.98927	0.636857	-10.8085	3.28161e-14	8.16289e-13	22.1496
OSBPL8_S808	-2.85938	0.640842	-11.187	3.6024e-14	8.83627e-13	22.1372
OCIAD1_S128	-2.04998	0.297524	-10.8038	3.32939e-14	8.25737e-13	22.1352
ADGRA1_S447	-2.27423	0.265439	-10.8884	3.42444e-14	8.44345e-13	22.123
PDCL_S25	-3.73874	0.94031	-10.7968	3.40176e-14	8.41212e-13	22.1137
HLCS_S294	-2.97781	0.722	-10.9703	3.60472e-14	8.83627e-13	22.104
RAPH1_S571	2.40715	-0.420441	11.6651	4.06324e-14	9.7895e-13	22.0971
TIMM8A_S57	-2.95164	0.558235	-11.6657	4.05675e-14	9.78786e-13	22.09
BNIP3_S131	-2.53405	0.403382	-11.6583	4.13427e-14	9.93226e-13	22.0799
ANAPC1_S731	-1.34902	0.338833	-10.784	3.53812e-14	8.69832e-13	22.0746
WDR48_S613	-2.91098	0.587212	-11.7982	4.27966e-14	1.01944e-12	22.0631
SPTBN1_T2337	-2.42046	0.433281	-11.9516	4.40229e-14	1.04423e-12	22.0471
ARHGAP1_S49	-3.42792	0.676229	-11.51	4.18879e-14	1.00347e-12	22.0398
SPTBN4_S2544	-2.16275	0.199675	-10.9485	3.84537e-14	9.34469e-13	22.0397
CLINT1_S299	-1.39401	0.367929	-10.7714	3.6785e-14	8.97799e-13	22.0358
GOLGA5_S116	2.19966	-0.261375	11.9413	4.5136e-14	1.06422e-12	22.0282
TPD52_S156	-2.44171	0.388211	-11.1468	4.03673e-14	9.7675e-13	22.024
DNAJA1_S335	-1.90927	0.486857	-10.7667	3.73275e-14	9.09724e-13	22.0213
AKAP12_S568	-2.77363	0.443789	-11.1417	4.09542e-14	9.85297e-13	22.0096
MYH7B_S1728	-2.06848	0.442861	-11.3738	4.21655e-14	1.00725e-12	22.0031
PLCB1_S982	-4.02941	0.683564	-11.0348	4.05314e-14	9.78786e-13	21.9885
NECTIN1_S422	-2.60327	0.559571	-10.7516	3.91003e-14	9.48816e-13	21.975
ANK3_S2672	-3.32648	0.787757	-11.2368	4.35883e-14	1.03538e-12	21.9647
GPI_T148	-1.85323	0.219	-10.7431	4.01409e-14	9.72667e-13	21.9489
PSIP1_S273	-3.34866	0.897333	-11.0155	4.28633e-14	1.01959e-12	21.9328
UBE2K_S159	-2.37418	0.482395	-11.1136	4.4354e-14	1.04913e-12	21.9304
NHSL1_S1089	3.05974	-0.710024	10.8238	4.16233e-14	9.98545e-13	21.9287
CAMKK1_S485	-2.53716	0.366405	-10.7285	4.19933e-14	1.00456e-12	21.9039
MAP7D1_S86	-2.59024	0.641476	-10.7255	4.23749e-14	1.01082e-12	21.8949
GPCPD1_S175	-1.99204	0.541211	-11.0995	4.61698e-14	1.08427e-12	21.8905
ASAP3_S862	2.69649	-0.594902	10.7967	4.51812e-14	1.06422e-12	21.8638
PCSK1N_S47	-1.58983	0.313057	-11.4419	5.01353e-14	1.16786e-12	21.8612
ADAM22_S841	-2.42385	0.457184	-11.0891	4.75506e-14	1.11226e-12	21.8612
OGA_S364	-1.92291	0.337143	-10.7118	4.42065e-14	1.04711e-12	21.8528
EPB41L3_S708	-4.05608	0.689524	-10.71	4.44626e-14	1.05023e-12	21.847
MAP1B_T1633	3.85146	-0.950071	10.7023	4.55202e-14	1.07071e-12	21.8236
IQSEC2_S741	-2.69602	0.452088	-11.5598	5.32451e-14	1.22675e-12	21.8199
GIGYF1_S157	2.36296	-0.527889	11.3009	5.13748e-14	1.1879e-12	21.8189
EPB41L1_S678	-3.54651	0.457571	-10.6974	4.62253e-14	1.08427e-12	21.8083
RGCC_S91	2.52077	-0.632921	11.0699	5.02125e-14	1.16805e-12	21.807
YWHAZ_S64	-2.71826	0.527057	-11.4156	5.37439e-14	1.23483e-12	21.7921
PRKAR2A_S80	-2.43957	0.496026	-11.0638	5.10926e-14	1.18362e-12	21.7897
TRAPPC2_S153	-2.3946	0.398643	-10.6904	4.72281e-14	1.10625e-12	21.7869
ADD2_S592	-3.67399	0.479738	-10.6864	4.78153e-14	1.1169e-12	21.7746
CAMK2B_T401	-3.39906	0.345158	-11.0585	5.18793e-14	1.19691e-12	21.7745
CAMK2B_S397	-4.18928	0.569256	-10.9599	5.03755e-14	1.17022e-12	21.7719
L1CAM_S1191	-2.60722	0.56169	-10.679	4.89208e-14	1.14115e-12	21.7518
DLGAP1_S431	-4.91581	0.581025	-10.8546	5.08143e-14	1.17879e-12	21.7463
TNKS1BP1_S851	4.45609	-1.04672	10.8347	5.39038e-14	1.23483e-12	21.7202
MADD_S1059	-3.1819	0.666381	-10.6629	5.14184e-14	1.1879e-12	21.7022
CLTC_S416	-3.46839	0.691031	-11.8043	6.29528e-14	1.41183e-12	21.6989
STXBP1_S86	-4.13203	0.62675	-10.8327	5.42251e-14	1.23761e-12	21.6979
FOSL2_S17	3.65536	-0.634878	10.7382	5.39621e-14	1.23483e-12	21.6872
44083_S85	2.47941	-0.634878	10.7365	5.42305e-14	1.23761e-12	21.6822
PTEN_S558	-3.61715	0.692629	-11.3712	6.04458e-14	1.36651e-12	21.6753
ANK2_S2537	-4.98648	0.903286	-11.3653	6.14127e-14	1.38466e-12	21.6595
PRRT2_S205	-4.24611	0.642548	-10.6485	5.37662e-14	1.23483e-12	21.6578
MAST1_S346	-2.6471	0.553243	-11.1252	5.94324e-14	1.34541e-12	21.6564
KIF1A_S1471	-2.73174	0.549524	-10.6478	5.38936e-14	1.23483e-12	21.6554
DPYSL2_S612	-2.99871	0.350667	-11.633	6.47047e-14	1.44345e-12	21.6537
KCNB1_S520	-3.79741	0.328421	-11.0111	5.93693e-14	1.34541e-12	21.6257
YWHAE_S210	-1.56021	0.293294	-11.4748	6.6308e-14	1.47397e-12	21.6118
KBTBD11_S87	-2.41275	0.323048	-10.6322	5.65475e-14	1.28875e-12	21.6075
RPAP1_S524	-2.77636	0.461571	-10.6185	5.90144e-14	1.34315e-12	21.565
EEPD1_S373	-2.45258	0.473976	-10.6163	5.94143e-14	1.34541e-12	21.5582
TANC2_S400	-1.84564	0.305524	-10.6163	5.94176e-14	1.34541e-12	21.5582
EFR3A_S220	-2.44233	0.518914	-11.3261	6.81485e-14	1.5083e-12	21.5561
EPB41L3_S819	-4.07218	0.627778	-11.196	6.83293e-14	1.50858e-12	21.5479
PCSK1N_S62	-3.46841	0.711525	-10.779	6.36362e-14	1.42337e-12	21.5387
KCNQ2_S672	-2.13172	0.277857	-10.6081	6.09416e-14	1.37588e-12	21.533
CA2_S216	-2.76584	0.628952	-10.6023	6.20507e-14	1.39718e-12	21.515
GLCCI1_S406	2.29304	-0.460214	10.6018	6.21367e-14	1.39725e-12	21.5136
ANK2_T2451	-3.96705	0.812425	-10.7744	6.45176e-14	1.44118e-12	21.5085
VIM_S412	3.14121	-0.472941	11.4337	7.37475e-14	1.61317e-12	21.5064
CYLD_S399	-1.90369	0.258024	-10.5994	6.26117e-14	1.40605e-12	21.506
GSS_S415	-1.99312	0.344643	-10.5967	6.31277e-14	1.41388e-12	21.4978
TRAPPC10_S573	-2.93231	0.600622	-11.0731	6.87408e-14	1.51544e-12	21.4978
SRRM2_T2738	2.07906	-0.313263	10.9469	7.1338e-14	1.56656e-12	21.4578
USP32_S1588	-1.80132	0.370786	-10.5832	6.58279e-14	1.46656e-12	21.4561
DLGAP2_S666	-3.02378	0.560757	-11.0505	7.32211e-14	1.60582e-12	21.449
TMEM163_S12	-2.27895	0.181619	-10.5808	6.63353e-14	1.47397e-12	21.4485
CNTNAP2_S1303	-3.16114	0.40269	-10.5789	6.67216e-14	1.4806e-12	21.4427
EPB41L1_S430	-2.37635	0.526976	-10.5773	6.70491e-14	1.48592e-12	21.4378
KIAA1671_S1675	-2.70981	0.612641	-10.8426	7.09402e-14	1.55985e-12	21.4309
CPEB3_S195	-2.10281	0.269973	-11.0428	7.48259e-14	1.63464e-12	21.4274
KCNA2_S440	-4.04959	0.460738	-10.5712	6.83399e-14	1.50858e-12	21.4188
CADPS_S1345	-3.03494	0.476071	-10.5665	6.93418e-14	1.5267e-12	21.4043
APC2_S108	-3.26754	0.611971	-11.2603	8.118e-14	1.75526e-12	21.3939
DGKB_T127	-3.27434	0.7025	-11.3791	8.49632e-14	1.8161e-12	21.3661
CAMK2A_T347	-4.34662	0.491143	-11.2515	8.31137e-14	1.78335e-12	21.3588
CEP170B_S1510	-3.0756	0.518143	-11.2496	8.35396e-14	1.79021e-12	21.3537
RAB5C_S157	-1.83224	0.504048	-10.5468	7.3712e-14	1.61317e-12	21.3434
USP14_T52	-1.81227	0.394946	-11.0103	8.1953e-14	1.76518e-12	21.3369
YWHAZ_Y128	-3.0989	0.554595	-10.5414	7.49764e-14	1.6358e-12	21.3265
ANK3_S3143	-2.56134	0.537846	-10.8066	7.88312e-14	1.70885e-12	21.3258
STIP1_S528	-2.3572	0.408553	-10.8985	8.19419e-14	1.76518e-12	21.3199
USP8_S641	2.29528	-0.499119	10.5368	7.60433e-14	1.65694e-12	21.3124
PDE1B_S523	-2.47451	0.191125	-11.6425	9.35303e-14	1.9742e-12	21.3116
SYP_T186	-6.00057	0.892513	-10.8009	8.01416e-14	1.73503e-12	21.3094
DMTN_S289	-3.04167	0.389452	-10.5268	7.84558e-14	1.70701e-12	21.2813
MAP1B_S2072	-2.76412	0.64719	-10.5264	7.85598e-14	1.70701e-12	21.28
PRRT2_S174	-2.98123	0.450051	-10.785	8.39657e-14	1.79706e-12	21.2791
44077_S590	-3.48407	0.538071	-10.526	7.86449e-14	1.70701e-12	21.2789
TACC1_S607	-2.48028	0.538095	-10.5154	8.12913e-14	1.75541e-12	21.2459
SLC2A3_T232	-3.65963	0.37927	-10.9735	9.08435e-14	1.92602e-12	21.2345
NEFM_S837	-4.339	0.267786	-10.5114	8.23062e-14	1.77053e-12	21.2336
DLG4_S461	-2.49743	0.370286	-10.5108	8.24661e-14	1.77171e-12	21.2316
GAP43_T184	-3.38742	0.682842	-10.8662	8.98983e-14	1.91431e-12	21.2278
MPP2_S166	-1.9383	0.194293	-10.586	8.57884e-14	1.83142e-12	21.2082
ARHGAP5_S765	-1.60617	0.280452	-10.4876	8.86416e-14	1.88994e-12	21.1597
VCP_S702	-1.52793	0.354744	-10.7405	9.56778e-14	2.01449e-12	21.1492
CDK17_S523	-1.66604	0.255857	-10.481	9.0472e-14	1.92174e-12	21.1393
CYFIP1_T1268	-2.35426	0.507333	-10.481	9.04752e-14	1.92174e-12	21.1393
GORASP2_T415	-1.29525	0.261857	-10.4795	9.0905e-14	1.92602e-12	21.1346
DOCK7_S1383	1.70028	-0.431952	10.4779	9.13504e-14	1.93303e-12	21.1297
AMPH_S549	-3.74732	0.757488	-10.5591	9.31393e-14	1.96841e-12	21.1262
ANK2_S2250	-4.59052	0.771707	-10.5538	9.46613e-14	1.99558e-12	21.1101
AHSA1_S218	-2.77981	0.420647	-11.275	1.11444e-13	2.30049e-12	21.0971
KIAA1549L_S1479	-3.31829	0.659513	-10.7176	1.02357e-13	2.14709e-12	21.0821
DACT3_S10	-2.92641	0.500061	-11.4009	1.16327e-13	2.39835e-12	21.0725
CACNG2_S253	-4.64304	0.606128	-10.7098	1.04716e-13	2.18343e-12	21.0594
EHD3_S456	-4.20639	1.0156	-10.6225	1.01662e-13	2.13516e-12	21.0554
TBC1D22A_S132	-1.51377	0.436897	-10.711	1.04366e-13	2.18109e-12	21.0462
DLG4_S338	-4.10579	0.842182	-11.393	1.187e-13	2.4413e-12	21.0425
ACAP2_S521	-1.35462	0.224214	-10.444	1.01545e-13	2.13516e-12	21.0243
ARHGAP32_S952	-2.4702	0.269842	-10.793	1.10948e-13	2.29307e-12	21.0185
BCL2L13_S468	-3.70148	0.576488	-10.5223	1.04271e-13	2.18109e-12	21.0137
GPR155_S862	-2.58299	0.542286	-10.4363	1.04045e-13	2.17977e-12	21
GIT1_S371	-2.61856	0.392452	-10.4341	1.04737e-13	2.18343e-12	20.9934
AKAP12_S1727	-2.69295	0.533333	-10.433	1.05102e-13	2.18832e-12	20.99
PTPRN2_S383	-4.19019	0.675595	-10.4324	1.05318e-13	2.19011e-12	20.9879
DSTN_T25	-2.94935	0.370095	-10.4317	1.05544e-13	2.19212e-12	20.9858
BASP1_S164	-4.03628	0.720524	-10.4296	1.06221e-13	2.20346e-12	20.9794
SGIP1_T263	-4.02928	0.425357	-10.4284	1.06641e-13	2.20947e-12	20.9755
SPTBN1_T2171	-2.77025	0.489657	-11.1021	1.23988e-13	2.5285e-12	20.9738
TPI1_S232	-2.24011	0.277357	-10.4251	1.07751e-13	2.22973e-12	20.9652
NDUFB4_S26	-1.55169	0.345412	-11.2256	1.26796e-13	2.58264e-12	20.9576
MAST3_S348	-2.29657	0.530289	-10.7613	1.21572e-13	2.49126e-12	20.9275
EPB41L3_S443	-3.63778	0.532775	-10.5676	1.19878e-13	2.46253e-12	20.9088
ARHGAP39_S299	-2.64023	0.337378	-10.8501	1.28595e-13	2.61295e-12	20.8888
YWHAG_Y133	-3.00729	0.429238	-10.3973	1.17513e-13	2.41984e-12	20.8788
CIC_S1648	1.76951	-0.190405	10.8392	1.326e-13	2.67499e-12	20.8736
FAM131B_S145	-3.66832	0.828703	-10.8421	1.31529e-13	2.65658e-12	20.8664
PRKCA_Y195	-2.26236	0.436429	-10.3875	1.21195e-13	2.48655e-12	20.848
PACS1_T46	-2.30953	0.485595	-10.3859	1.21775e-13	2.49241e-12	20.8433
STX1A_S14	-3.68442	0.584429	-10.3845	1.22315e-13	2.50042e-12	20.8389
GPHN_S200	-2.24226	0.445667	-10.383	1.22915e-13	2.50964e-12	20.834
ANK2_S1855	-4.34159	0.47722	-10.4549	1.28223e-13	2.60855e-12	20.8077
CAMK2A_S344	-3.68128	0.690029	-11.0401	1.46503e-13	2.92399e-12	20.7952
PSMD1_S315	-3.67912	0.847575	-10.5297	1.34398e-13	2.7048e-12	20.795
ANKS1B_S510	-2.35621	0.432469	-11.437	1.55425e-13	3.09109e-12	20.7946
ASTN1_S898	-2.59485	0.440857	-10.3674	1.29047e-13	2.619e-12	20.7855
KCNB1_S484	-3.82376	0.556868	-10.7101	1.40976e-13	2.83044e-12	20.7802
SMARCA4_S1449	2.98059	-0.578595	10.8056	1.4583e-13	2.914e-12	20.7792
HID1_S653	-2.26124	0.346643	-10.3638	1.30495e-13	2.64312e-12	20.7744
MYCBP2_S3932	-2.28342	0.395881	-10.3637	1.3055e-13	2.64312e-12	20.7739
CAMK2G_S358	-3.82621	0.590024	-10.3626	1.30987e-13	2.64879e-12	20.7706
DNAJC17_S112	3.81513	-0.45095	10.5133	1.41194e-13	2.83144e-12	20.7643
PRKCA_S149	-2.41337	0.487235	-11.1468	1.55925e-13	3.09738e-12	20.752
GRIN2B_S1143	-4.12406	0.78	-10.3554	1.34014e-13	2.7003e-12	20.7478
AP1G1_S235	-3.41117	0.587412	-11.137	1.59985e-13	3.16313e-12	20.7385
CEND1_S9	-3.38149	0.53027	-10.7949	1.50292e-13	2.99608e-12	20.7337
PRKCG_S148	-2.22239	0.331455	-11.2657	1.64248e-13	3.22849e-12	20.7305
CLTC_S580	-2.03611	0.365861	-10.8997	1.54168e-13	3.0697e-12	20.7262
PGM2L1_S175	-1.60284	0.235071	-10.3473	1.37421e-13	2.76234e-12	20.7228
MADD_T1237	-2.40353	0.384813	-11.4022	1.69447e-13	3.30373e-12	20.7181
ANK2_S3277	-3.56905	0.508813	-11.3912	1.74176e-13	3.39201e-12	20.6977
VPS8_S768	-2.4693	0.298917	-10.894	1.56612e-13	3.10737e-12	20.6961
KIAA0556_S691	1.86716	-0.554833	10.3343	1.43177e-13	2.8678e-12	20.6819
STK10_S438	2.38164	-0.408048	10.333	1.43745e-13	2.87576e-12	20.678
SLC9A1_S726	-5.17657	0.963528	-10.8808	1.62431e-13	3.20398e-12	20.6742
CCSER2_S488	-1.62618	0.228771	-10.9752	1.74548e-13	3.39376e-12	20.621
CPEB4_S332	-1.91652	0.195211	-10.6475	1.68989e-13	3.2986e-12	20.5999
KIAA1211L_S490	-1.92433	0.24469	-10.303	1.57956e-13	3.13036e-12	20.5841
MAP1B_S1620	-2.74422	0.367048	-10.3001	1.59399e-13	3.15523e-12	20.575
SUPT16H_S1023	3.36658	-0.577561	10.3716	1.6567e-13	3.25265e-12	20.5713
YAP1_S164	3.77682	-1.03817	10.2942	1.62353e-13	3.20398e-12	20.5567
PTPRR_S272	-4.08049	0.658341	-10.3706	1.66191e-13	3.25529e-12	20.5493
SRRM1_S207	-2.83826	0.858381	-10.2915	1.6373e-13	3.22582e-12	20.5483
CKMT1A_S227	-3.48328	0.49069	-10.291	1.64016e-13	3.22769e-12	20.5466
HSPA4L_T576	-4.18868	0.610452	-10.287	1.66083e-13	3.25529e-12	20.5341
RIMS1_S448	-2.27522	0.474214	-10.2857	1.66778e-13	3.263e-12	20.5299
MIOS_S766	-1.32191	0.23569	-10.2827	1.68318e-13	3.28932e-12	20.5208
UNC13A_T407	-3.49081	0.567974	-10.616	1.85146e-13	3.55636e-12	20.509
ADH5_S351	-1.54529	0.203629	-10.9242	2.00354e-13	3.80087e-12	20.4976
REEP3_S152	2.09819	-0.425643	10.271	1.74668e-13	3.39376e-12	20.4839
KCNC1_S160	-3.04546	0.411806	-10.8117	1.9672e-13	3.74776e-12	20.4837
EVL_S132	-1.97094	0.273405	-10.2689	1.75824e-13	3.41228e-12	20.4773
EPB41L3_S7	-3.30275	0.434429	-10.2633	1.78918e-13	3.46833e-12	20.4599
MAP4K2_S298	-1.94986	0.408049	-10.341	1.8208e-13	3.5175e-12	20.4583
CIC_T472	1.4921	-0.20719	10.2597	1.80967e-13	3.50403e-12	20.4486
MACF1_S4074	-3.2105	0.627938	-11.2918	2.2319e-13	4.18234e-12	20.445
FASN_S207	-1.85855	0.404381	-10.2584	1.81708e-13	3.51434e-12	20.4445
HSPA12A_S649	-2.32744	0.288436	-10.5059	1.91302e-13	3.65381e-12	20.4424
PEX5L_S316	-2.94695	0.191095	-10.2566	1.82711e-13	3.52565e-12	20.439
MAP1A_S526	-2.67933	0.55081	-10.2562	1.8294e-13	3.52604e-12	20.4378
CAP2_S309	-3.71646	0.502476	-10.2555	1.83355e-13	3.53e-12	20.4355
ZDHHC8_S675	-1.61069	0.309238	-10.2549	1.83709e-13	3.53279e-12	20.4336
CEND1_S10	-3.96413	0.458548	-10.2475	1.88015e-13	3.60736e-12	20.4105
TANC2_T149	-3.18016	0.643974	-10.5801	2.05522e-13	3.87278e-12	20.4052
MYO18A_S2002	-2.18877	0.368143	-10.2445	1.89841e-13	3.63826e-12	20.4009
SCG2_S285	-2.34286	0.464738	-10.2436	1.9034e-13	3.64093e-12	20.3982
ARHGAP21_S319	-1.62511	0.278238	-10.2435	1.90412e-13	3.64093e-12	20.3979
WIPF2_S155	-2.63614	0.244	-11.0078	2.24963e-13	4.21088e-12	20.3875
LSM14A_S192	2.28055	-0.315476	10.2384	1.93531e-13	3.6922e-12	20.3817
GIGYF2_S223	2.37536	-0.359122	10.3072	2.02149e-13	3.82202e-12	20.3733
GRIP1_S43	-3.46752	0.473857	-10.2329	1.96888e-13	3.74776e-12	20.3645
RB1CC1_S266	-2.44485	0.465048	-10.2294	1.99087e-13	3.78279e-12	20.3535
MARK4_S438	-3.00155	0.586976	-10.2292	1.99177e-13	3.78279e-12	20.353
PRRC2C_S924	2.66272	-0.480643	10.2263	2.01028e-13	3.80936e-12	20.3438
NBEA_S1267	-2.64377	0.403976	-10.2259	2.01276e-13	3.80978e-12	20.3426
PTPRN2_S460	-3.58881	0.582605	-10.5574	2.19573e-13	4.12371e-12	20.3394
CEND1_S86	-4.01944	0.500643	-10.2207	2.04585e-13	3.86375e-12	20.3263
DST_S414	-2.22347	0.277095	-10.2194	2.0543e-13	3.87278e-12	20.3222
MIB2_S159	-2.53127	0.4795	-10.5474	2.26035e-13	4.22542e-12	20.3105
CCDC85A_S335	-4.04373	0.799119	-10.2142	2.08854e-13	3.93117e-12	20.3057
GLO1_S137	-1.77363	0.269214	-10.2107	2.11168e-13	3.97029e-12	20.2948
NADK2_S367	-1.98952	0.29281	-10.1964	2.20894e-13	4.14392e-12	20.2499
TAOK1_S421	-1.89928	0.243595	-10.1888	2.26241e-13	4.22542e-12	20.2261
RIMS1_S1256	-3.47529	0.735	-10.715	2.57455e-13	4.76616e-12	20.216
TMEM74B_S84	-1.85088	0.381811	-10.6102	2.54078e-13	4.714e-12	20.2113
RRAS2_T190	-1.85897	0.163381	-10.1836	2.30008e-13	4.29101e-12	20.2096
CAMK2A_S272	-4.08978	0.654647	-10.9402	2.69081e-13	4.9488e-12	20.2094
PKP4_S337	-2.35181	0.400743	-10.8226	2.64002e-13	4.87666e-12	20.2094
NAPG_S284	-4.57053	0.671575	-10.3342	2.4289e-13	4.52134e-12	20.2062
PPME1_S243	-3.01898	0.5675	-10.1718	2.38747e-13	4.44914e-12	20.1725
DLGAP1_S359	-4.04689	0.74997	-11.0464	2.88804e-13	5.21486e-12	20.1707
IMMT_S584	-2.15234	0.443	-10.7976	2.82649e-13	5.13671e-12	20.1415
RYR2_T1856	-4.1006	0.624756	-10.2381	2.50398e-13	4.65598e-12	20.1408
SRCIN1_S225	-4.21914	0.4935	-10.3171	2.55815e-13	4.74102e-12	20.1358
PRRC2B_S480	2.24638	-0.369289	10.4859	2.70445e-13	4.96848e-12	20.132
PPP1R7_S27	-1.79219	0.386071	-10.154	2.52533e-13	4.69049e-12	20.1165
STMN3_S50	-3.83574	0.996366	-10.227	2.59151e-13	4.7923e-12	20.1065
HK1_S372	-3.86852	0.721541	-10.5716	2.83625e-13	5.14281e-12	20.1019
CARMIL2_S1416	-2.30269	0.598649	-10.5759	2.80209e-13	5.10889e-12	20.0976
UBE4B_S803	-3.06421	0.737941	-10.8883	3.08866e-13	5.51659e-12	20.0858
CAMK2A_T345	-3.80444	0.627282	-10.3806	2.77823e-13	5.07637e-12	20.0705
ALDOA_T63	-1.63554	0.282714	-10.1384	2.65273e-13	4.89478e-12	20.0675
SNAP91_S300	-4.34743	0.763714	-10.1353	2.67863e-13	4.93717e-12	20.0578
WDR17_T1230	-2.50469	0.449143	-10.1346	2.68514e-13	4.94376e-12	20.0554
CAMK2B_T382	-3.51579	0.712571	-10.7648	3.09112e-13	5.51659e-12	20.0524
EPB41L1_S466	-3.16153	0.721683	-10.2076	2.75257e-13	5.04589e-12	20.0465
ALDOA_S326	-3.14344	0.39341	-10.3723	2.84746e-13	5.15262e-12	20.046
RTN4_S446	-2.69914	0.386024	-10.1297	2.72688e-13	5.00422e-12	20.04
PRDX5_T97	-2.52232	0.318816	-10.4529	2.97786e-13	5.34272e-12	20.0362
MAP4K4_S600	1.78278	-0.284432	10.5481	3.03411e-13	5.43786e-12	20.0348
PSMC1_T53	-1.59302	0.273452	-10.1261	2.75797e-13	5.0503e-12	20.0287
BSN_S3509	-2.29194	0.471857	-10.1251	2.76642e-13	5.06028e-12	20.0257
MAP1S_S582	-1.21781	0.108929	-10.1229	2.78644e-13	5.08585e-12	20.0185
DPYSL2_S533	-1.83389	0.414643	-10.1205	2.80774e-13	5.11366e-12	20.0109
MAP1A_T1656	-2.67849	0.597024	-10.1194	2.81696e-13	5.12493e-12	20.0076
GSR_T448	-1.75931	0.374703	-10.5372	3.12955e-13	5.57927e-12	20.0039
ARFGEF3_S1676	-2.22586	0.349333	-10.1172	2.83673e-13	5.14281e-12	20.0006
STX1B_S58	-3.37735	0.448143	-10.117	2.83899e-13	5.14281e-12	19.9999
NLK_T298	-1.76698	0.2324	-10.741	3.29838e-13	5.86785e-12	19.9879
AVL9_T333	-4.02023	0.83869	-10.112	2.88357e-13	5.21236e-12	19.9843
VPS4A_S95	-2.74712	0.678765	-10.8521	3.4021e-13	6.03896e-12	19.9761
SV2A_T84	-2.44511	0.596951	-10.1843	2.95898e-13	5.32017e-12	19.9744
HDGFL2_S258	-3.39878	0.61331	-10.1087	2.9139e-13	5.25594e-12	19.9739
PTK2_Y661	2.2349	-0.394786	10.1055	2.94381e-13	5.3042e-12	19.9637
PCDHGC5_S736	-2.55739	0.3228	-10.7266	3.4315e-13	6.07902e-12	19.9635
SGIP1_S459	-2.62901	0.358571	-10.1043	2.9551e-13	5.31886e-12	19.9599
TSC2_S664	-1.43199	0.231643	-10.1032	2.96569e-13	5.32656e-12	19.9563
TBC1D9_S471	-2.34172	0.396524	-10.0924	3.06864e-13	5.4939e-12	19.9223
YBX1_S176	3.15922	-0.548976	10.0919	3.07312e-13	5.49609e-12	19.9209
NFASC_S1174	-3.56161	0.482781	-11.0707	3.893e-13	6.79662e-12	19.8933
ZBTB21_S345	1.91285	-0.248714	10.0798	3.1936e-13	5.68745e-12	19.8826
CACNA1E_S736	-2.5365	0.416308	-10.3005	3.52959e-13	6.20067e-12	19.8503
BASP1_T196	-3.12718	0.600929	-10.0651	3.34619e-13	5.94662e-12	19.8361
KCNA2_S447	-4.63785	0.818225	-10.2162	3.4802e-13	6.12668e-12	19.829
VCP_S748	-3.7961	0.629437	-11.0446	4.15858e-13	7.20066e-12	19.8279
CCNY_S326	-2.0859	0.30119	-10.0595	3.40531e-13	6.03896e-12	19.8186
PRKCE_S381	-2.18308	0.336833	-10.0564	3.43953e-13	6.08685e-12	19.8086
UBE3B_S419	-1.89983	0.2715	-10.0551	3.45351e-13	6.102e-12	19.8046
MAP4_S99	2.11808	-0.390238	10.0549	3.45533e-13	6.102e-12	19.8041
CKB_T346	-2.37271	0.215286	-10.0545	3.46023e-13	6.10427e-12	19.8027
KSR2_S445	-2.02929	0.198	-10.0532	3.47467e-13	6.12333e-12	19.7985
BRAF_S365	-1.87902	0.288738	-10.0489	3.52251e-13	6.1947e-12	19.7849
KSR1_S174	1.9651	-0.221548	10.0416	3.60447e-13	6.32564e-12	19.762
UBE4B_S1265	-1.73206	0.264225	-10.1832	3.84857e-13	6.72603e-12	19.7481
GNG2_S57	-1.59341	0.50541	-10.2719	3.8453e-13	6.72603e-12	19.7465
DYNC1I1_S179	-3.62743	0.478095	-10.0365	3.66329e-13	6.42217e-12	19.7458
CHGB_S149	-3.09939	0.625095	-10.0352	3.67857e-13	6.44226e-12	19.7417
SLC4A3_S324	-2.93516	0.26325	-10.1682	4.02964e-13	6.99896e-12	19.7024
SRRM2_S1421	1.78394	-0.287268	10.0872	4.00372e-13	6.9683e-12	19.6932
DNAJA4_S365	-3.30176	0.6438	-10.1713	3.99153e-13	6.95426e-12	19.6924
IQSEC2_S744	-2.72168	0.546098	-10.0929	3.93292e-13	6.85923e-12	19.6908
USP14_S74	-2.30087	0.435265	-10.7309	4.70414e-13	8.03803e-12	19.6682
SV2A_S127	-3.19517	0.595952	-10.0077	4.0143e-13	6.9795e-12	19.6547
GIGYF2_S160	1.65425	-0.286611	10.5126	4.53925e-13	7.78784e-12	19.6517
TRAPPC8_T968	-1.95487	0.439053	-10.317	4.43703e-13	7.64179e-12	19.6393
YRDC_S60	-1.65468	0.169281	-10.9647	5.09422e-13	8.65197e-12	19.6265
CACNA1B_S783	-3.38948	0.561833	-9.99753	4.14611e-13	7.18917e-12	19.6225
CTNNA2_S939	-2.46413	0.438786	-9.99741	4.14768e-13	7.18917e-12	19.6221
WDR44_S403	-1.382	0.24181	-9.99104	4.23262e-13	7.32134e-12	19.6019
NES_S578	3.18628	-0.391714	9.98804	4.27319e-13	7.38394e-12	19.5924
CRMP1_S635	-3.57207	0.670268	-10.0541	4.43878e-13	7.64179e-12	19.5702
ANKS1B_S353	-4.23598	0.5465	-10.2982	4.6902e-13	8.02233e-12	19.566
PLEKHA6_S428	-2.9611	0.55331	-9.9786	4.4033e-13	7.60099e-12	19.5625
CEP131_S78	2.71341	-0.306415	10.0437	4.58613e-13	7.85229e-12	19.5581
MAP3K10_S589	-1.8924	0.297333	-9.97596	4.44053e-13	7.64179e-12	19.5541
EIF4G1_S321	3.3979	-0.454028	10.4611	5.2487e-13	8.86967e-12	19.5537
SNPH_S530	-1.72939	0.183857	-9.97086	4.51311e-13	7.75878e-12	19.5379
DCTN2_T243	-1.89527	0.363524	-9.96955	4.53198e-13	7.78329e-12	19.5338
SPTAN1_S1302	-2.83878	0.496778	-10.4631	5.21949e-13	8.82916e-12	19.5298
CADM3_S422	-3.88383	0.56631	-9.96811	4.55286e-13	7.80325e-12	19.5292
MAPT_T69	-3.93748	0.516889	-10.4682	5.14412e-13	8.72792e-12	19.5272
HTATSF1_S387	2.37681	-0.374585	10.026	4.84577e-13	8.27166e-12	19.5033
FXYD7_S60	-5.82992	1.04184	-10.3617	5.18381e-13	8.78643e-12	19.4844
PPP1R7_S44	-2.6525	0.460892	-10.3552	5.28247e-13	8.9178e-12	19.4829
CKMT1A_T441	-2.61847	0.33535	-10.0947	5.04848e-13	8.58292e-12	19.478
BRSK1_S443	-1.78379	0.287119	-9.94726	4.86519e-13	8.29641e-12	19.4631
NAV2_S1115	2.28687	-0.565619	9.9442	4.9129e-13	8.3693e-12	19.4534
AP2A1_T794	-4.00559	0.481463	-10.0145	5.02419e-13	8.55024e-12	19.4468
PPP2R5C_S552	1.91251	-0.286757	10.3391	5.53421e-13	9.28702e-12	19.4366
KDM2B_S795	2.41452	-0.479588	10.6409	5.99103e-13	9.94475e-12	19.4281
PALM2_S371	-2.38957	0.566971	-10.6399	6.007e-13	9.96147e-12	19.4255
CAMSAP2_S1313	1.73302	-0.256119	9.926	5.20627e-13	8.81564e-12	19.3956
CRYAB_S19	-2.89144	0.474158	-10.2287	5.75654e-13	9.57437e-12	19.3801
ABLIM3_S282	-3.13556	0.405278	-10.4048	6.15409e-13	1.01455e-11	19.3662
HOMER3_S159	1.81788	-0.508333	9.9148	5.39552e-13	9.09954e-12	19.36
CEP170B_T542	-2.33574	0.547667	-9.91428	5.40447e-13	9.10553e-12	19.3583
LDHA_S339	-2.22405	0.275976	-9.91055	5.46905e-13	9.20515e-12	19.3465
FGF12_S212	-4.08187	0.471929	-9.91012	5.47667e-13	9.20877e-12	19.3451
KCNA2_S468	-3.85743	0.775878	-9.98177	5.56611e-13	9.32623e-12	19.3447
PACSIN1_T184	-4.05893	0.372952	-9.9077	5.51907e-13	9.27083e-12	19.3374
AK1_S54	-1.60758	0.180905	-9.9049	5.56864e-13	9.32623e-12	19.3285
GAPDH_S210	-2.80821	0.360548	-9.90356	5.59245e-13	9.35681e-12	19.3242
AKAP12_S483	-3.28955	0.555024	-9.90183	5.62344e-13	9.39934e-12	19.3187
EXOC2_S432	2.07212	-0.508905	9.90049	5.64753e-13	9.43026e-12	19.3145
STXBP1_S509	-2.89049	0.262786	-9.89871	5.67965e-13	9.47452e-12	19.3088
PALLD_S894	3.3121	-0.755524	9.89525	5.74268e-13	9.57019e-12	19.2978
PRKCE_S368	-2.40171	0.456833	-9.89461	5.75445e-13	9.57437e-12	19.2958
AAK1_T606	-2.1704	0.446905	-9.88619	5.91111e-13	9.82176e-12	19.269
ATXN2L_S339	2.39002	-0.403722	10.3734	6.72632e-13	1.10135e-11	19.2602
MAP6_S184	-2.67101	0.396821	-10.1068	6.32014e-13	1.03989e-11	19.2512
44078_S340	-3.07865	0.583952	-9.87999	6.02942e-13	9.98883e-12	19.2493
ADD3_S423	-2.80878	0.31778	-9.95091	6.13149e-13	1.01182e-11	19.2483
IP6K1_S382	-2.13131	0.435619	-9.87883	6.05174e-13	1.0016e-11	19.2456
SPECC1_S914	2.01289	-0.233	9.87794	6.06898e-13	1.00346e-11	19.2428
DNAJB2_S98	-2.99785	0.546214	-9.87556	6.11529e-13	1.01013e-11	19.2352
PPP2CA_S26	-2.81299	0.599842	-10.1754	6.74011e-13	1.10254e-11	19.2231
SNAP91_S313	-4.00853	0.781	-9.87025	6.21974e-13	1.02437e-11	19.2183
KPNB1_S12	-1.73085	0.443789	-10.1673	6.90399e-13	1.12498e-11	19.1992
CTNND2_S32	-2.6024	0.35881	-9.86406	6.34403e-13	1.04281e-11	19.1986
VDAC2_S130	-2.13285	0.303524	-9.8627	6.37167e-13	1.04633e-11	19.1943
RELCH_S244	-2.72211	0.605806	-10.3487	7.21294e-13	1.16855e-11	19.1907
USP7_S963	-1.8241	0.282921	-10.1635	6.98164e-13	1.13544e-11	19.1881
CTNND2_S38	-3.014	0.417529	-10.551	7.63581e-13	1.22997e-11	19.1872
KMT2A_S3521	-2.33011	0.540643	-9.86043	6.41804e-13	1.05292e-11	19.187
CAMK2G_T37	-3.28506	0.36295	-9.99379	6.88617e-13	1.12316e-11	19.169
CASC3_S125	2.04308	-0.183303	10.6574	7.98016e-13	1.27569e-11	19.1619
DLG4_Y283	-4.66189	1.07558	-10.1575	7.10702e-13	1.15361e-11	19.1517
SLC12A6_S1032	-2.22494	0.503167	-9.84914	6.65391e-13	1.09056e-11	19.1511
EPS15L1_S355	-1.72912	0.357071	-9.83952	6.86167e-13	1.12134e-11	19.1204
NCOR1_S2184	3.00577	-0.562206	10.5257	8.17659e-13	1.30216e-11	19.1193
SRRM2_S2702	2.04696	-0.340119	9.83888	6.87581e-13	1.12256e-11	19.1184
CLTC_T239	-2.47012	0.321848	-10.6405	8.34439e-13	1.32762e-11	19.1176
USP10_S551	-1.88958	0.545667	-9.8371	6.91495e-13	1.12568e-11	19.1127
VPS35_S7	-3.64684	0.475071	-9.82898	7.09709e-13	1.15311e-11	19.0868
MPLKIP_S133	2.43727	-0.41225	9.95551	7.74958e-13	1.24355e-11	19.0732
PHF2_S655	2.05221	-0.318548	9.82449	7.19979e-13	1.16754e-11	19.0725
MTMR3_S647	2.08832	-0.358952	9.82313	7.23105e-13	1.17036e-11	19.0682
SHANK1_S413	-3.22593	0.502333	-10.2967	8.36153e-13	1.3291e-11	19.0617
EIF5_S390	-2.36	0.726714	-9.8193	7.32029e-13	1.18367e-11	19.0559
SUB1_S19	-3.64163	0.7205	-9.81735	7.36621e-13	1.18995e-11	19.0497
RSF1_T1278	2.45567	-0.386937	10.7335	9.20513e-13	1.44413e-11	19.0393
TRIM2_S455	-3.12556	0.528762	-9.81327	7.46304e-13	1.20444e-11	19.0367
CARTPT_S48	-4.23711	0.673619	-9.81106	7.51601e-13	1.21183e-11	19.0296
MAP1A_S1283	-3.14962	0.587524	-9.80533	7.65513e-13	1.23191e-11	19.0114
ANK3_S1984	-2.49759	0.392833	-9.80422	7.68223e-13	1.23509e-11	19.0078
SPTBN1_S2161	-3.1257	0.263429	-9.80158	7.74768e-13	1.24355e-11	18.9994
RPS6KC1_S423	-2.45642	0.613952	-9.80084	7.76596e-13	1.24499e-11	18.997
CLASP1_S558	-2.8928	0.51	-10.5886	9.57067e-13	1.4973e-11	18.9956
SH3KBP1_S156	-2.03005	0.476579	-10.0959	8.53272e-13	1.35503e-11	18.9883
CACNA1C_S815	-2.93953	0.326235	-10.4751	9.3803e-13	1.46888e-11	18.9828
MECP2_S92	-1.32386	0.139381	-9.79485	7.91639e-13	1.26771e-11	18.9779
44081_S334	-2.03191	0.286833	-9.7946	7.92272e-13	1.26771e-11	18.9771
44082_S18	-2.00946	0.357357	-9.79197	7.98964e-13	1.276e-11	18.9687
NAPG_T287	-2.20561	0.574455	-10.5859	9.63914e-13	1.50467e-11	18.9595
GSG1L_S302	-2.45747	0.550238	-9.78828	8.08471e-13	1.28996e-11	18.957
TSC2_S1254	-1.71129	0.16519	-9.78541	8.15942e-13	1.30065e-11	18.9478
NCAM1_T819	-2.20683	0.510952	-9.76698	8.65608e-13	1.3718e-11	18.8889
ADD2_S699	-2.95464	0.2335	-9.76682	8.66047e-13	1.3718e-11	18.8884
EFR3B_S216	-2.03223	0.35369	-9.76674	8.6627e-13	1.3718e-11	18.8881
CEP170_S446	3.22366	-0.448098	9.82852	9.00919e-13	1.42044e-11	18.8861
SIRT1_S27	2.11694	-0.248105	10.0569	9.58199e-13	1.49768e-11	18.8729
DUSP22_S58	-1.29043	0.21031	-9.76178	8.80168e-13	1.3925e-11	18.8723
PURG_S156	-1.80414	0.134571	-9.76138	8.81284e-13	1.39267e-11	18.871
USP5_S783	-1.73837	0.377024	-9.76116	8.81926e-13	1.39267e-11	18.8703
DNAJC5_S28	-3.97067	0.78273	-10.1427	9.7847e-13	1.52372e-11	18.8693
PIK3R1_S83	-2.1813	0.329921	-10.0547	9.64451e-13	1.50467e-11	18.8664
MAP1A_S644	-2.25892	0.53661	-9.8265	9.06679e-13	1.42774e-11	18.8584
PALM3_S72	-2.92702	0.62861	-9.82572	9.089e-13	1.42991e-11	18.8559
TOMM70_T85	-2.3782	0.490474	-10.0491	9.80538e-13	1.52553e-11	18.8499
SLC9A3R1_T293	-1.47746	0.286357	-9.75442	9.012e-13	1.42044e-11	18.8487
NUMBL_S270	-3.25733	0.764556	-10.2314	1.00713e-12	1.55971e-11	18.841
44083_S332	-1.96355	0.249548	-9.74904	9.16875e-13	1.44111e-11	18.8316
MCTP1_S989	-3.62027	0.646167	-9.74821	9.19316e-13	1.4436e-11	18.8289
TRIM2_S451	-2.45051	0.486714	-9.74623	9.25196e-13	1.45013e-11	18.8226
SYP_T86	-2.22416	0.438028	-10.21	1.07041e-12	1.64565e-11	18.8163
SMIM13_S58	-2.2158	0.439676	-10.4109	1.11693e-12	1.70009e-11	18.8095
PPP1R9B_S205	2.80122	-0.39085	9.86613	1.02176e-12	1.58092e-11	18.7985
AIP_S159	-2.12795	0.336056	-10.2063	1.08187e-12	1.65787e-11	18.7871
NEFH_S511	-3.09271	0.362735	-10.4081	1.12556e-12	1.71015e-11	18.7853
ABLIM2_S382	-2.97597	0.570512	-9.79991	9.8598e-13	1.53259e-11	18.7748
SPTBN1_S257	-2.37618	0.172	-9.73108	9.71303e-13	1.51396e-11	18.7741
IQSEC1_S783	-2.80975	0.50945	-9.86486	1.02578e-12	1.58569e-11	18.7724
ITPKB_S679	-2.24571	0.277351	-10.1051	1.09177e-12	1.66932e-11	18.7602
ABLIM2_S294	-3.3716	0.431971	-10.398	1.15701e-12	1.75292e-11	18.7579
CRTC3_S329	2.15808	-0.340476	9.72366	9.94716e-13	1.54474e-11	18.7504
ARAP3_S1337	2.78133	-0.176211	10.0137	1.08955e-12	1.66744e-11	18.745
CLINT1_S227	-2.47654	0.584595	-9.72163	1.00124e-12	1.55344e-11	18.7438
SATB2_S594	-2.69956	0.684974	-9.93789	1.05435e-12	1.62537e-11	18.741
ANK2_S1882	-3.38835	0.481167	-9.71996	1.0066e-12	1.55971e-11	18.7385
PEBP1_S99	-3.08715	0.692487	-9.92929	1.08231e-12	1.65787e-11	18.735
NUMB_T436	2.33502	-0.402341	9.77892	1.05354e-12	1.62537e-11	18.7303
FBXL2_T435	-1.36832	0.147	-9.70837	1.04481e-12	1.61361e-11	18.7014
RYR2_S2363	-4.27578	0.563875	-9.84103	1.10447e-12	1.68264e-11	18.6988
KDM3B_S314	2.02434	-0.341114	10.2706	1.21064e-12	1.81488e-11	18.6936
NPY1R_S368	-2.90475	0.61581	-9.70127	1.06892e-12	1.64565e-11	18.6787
SLC17A7_S504	-1.98468	0.443769	-9.91693	1.12377e-12	1.70896e-11	18.6774
SLC9A6_S606	-2.33733	0.28319	-9.70083	1.07043e-12	1.64565e-11	18.6773
MAST1_S1362	-3.00475	0.565238	-9.69862	1.07809e-12	1.65591e-11	18.6701
SPTBN1_S2165	-2.09915	0.227333	-9.69824	1.07939e-12	1.65641e-11	18.6689
FOXO1_S256	2.46206	-0.435895	9.98688	1.18047e-12	1.78543e-11	18.6652
EIF5B_S214	1.24761	-0.207738	9.69403	1.09408e-12	1.67135e-11	18.6555
GRM5_S1182	-2.85512	0.526703	-10.0691	1.21301e-12	1.81682e-11	18.6553
NUMBL_S411	2.66507	-0.631615	9.90922	1.15048e-12	1.74644e-11	18.654
GPM6A_T268	-3.54741	0.78419	-9.69289	1.09814e-12	1.67602e-11	18.6518
FBXO41_S840	-3.59419	0.4184	-9.82581	1.15787e-12	1.75292e-11	18.6518
INA_S72	-2.26128	0.514833	-9.69138	1.10347e-12	1.68264e-11	18.647
NFASC_T1176	-3.10184	0.611436	-9.89638	1.19634e-12	1.79664e-11	18.6353
USP7_S155	-2.20058	0.543312	-10.5751	1.38589e-12	2.03775e-11	18.6186
VDAC2_T83	-1.92037	0.345421	-9.96988	1.24194e-12	1.85542e-11	18.6146
ARFGEF1_T48	-2.01907	0.421171	-10.2323	1.34744e-12	1.9899e-11	18.605
TXNL1_S113	-1.17988	0.171286	-9.67688	1.15615e-12	1.75292e-11	18.6005
MAP1B_S2074	-3.02142	0.589421	-9.96234	1.27021e-12	1.89074e-11	18.5922
SNX4_S22	-2.90534	0.508452	-9.67015	1.18146e-12	1.78543e-11	18.5789
DNM3_S769	-4.73384	0.542333	-9.66976	1.18294e-12	1.786e-11	18.5777
MAP1A_S1311	-3.83456	1.01602	-9.66933	1.1846e-12	1.786e-11	18.5763
CLASP1_S1223	3.22015	-0.465538	9.86969	1.29774e-12	1.92662e-11	18.5761
IQSEC1_S184	-1.95293	0.318333	-9.66922	1.18502e-12	1.786e-11	18.5759
MBP_S96	2.06768	-0.230619	9.66737	1.19207e-12	1.79503e-11	18.57
SRRM2_S1219	2.16575	-0.226119	9.66651	1.1954e-12	1.79664e-11	18.5672
RABGAP1_S508	-2.59941	0.441048	-9.6663	1.19622e-12	1.79664e-11	18.5665
ABLIM2_S479	-3.00501	0.35	-9.95122	1.31315e-12	1.94436e-11	18.5591
PSD3_S1019	-4.07907	0.740938	-10.546	1.49499e-12	2.18106e-11	18.5578
RABL6_S471	-2.60084	0.496929	-9.66263	1.21042e-12	1.81488e-11	18.5548
C16orf70_S272	-2.02757	0.403024	-9.65877	1.22554e-12	1.83396e-11	18.5424
PDE4D_S348	-2.07843	0.429205	-9.86889	1.30089e-12	1.9279e-11	18.5315
PIKFYVE_S307	1.34399	-0.287119	9.65461	1.24208e-12	1.85542e-11	18.529
CAMK2G_S321	-2.65953	0.485929	-9.65138	1.25508e-12	1.87318e-11	18.5187
TRIM2_S338	-1.86287	0.411088	-10.3028	1.50032e-12	2.18595e-11	18.5163
TSC22D3_S188	1.72851	-0.469585	9.71766	1.27868e-12	1.89999e-11	18.5157
MAP1A_S118	-2.08901	0.42419	-9.64948	1.26275e-12	1.88296e-11	18.5126
SPTBN1_S2102	-2.59744	0.405929	-9.6489	1.26511e-12	1.88482e-11	18.5107
RBM14_S215	1.62819	-0.189929	9.64657	1.27467e-12	1.89571e-11	18.5032
DGKB_S95	-3.73407	0.37231	-9.64046	1.30002e-12	1.9279e-11	18.4836
SF3B2_T780	1.74632	-0.259049	9.69743	1.36325e-12	2.00972e-11	18.4738
KIF2A_S137	-3.48054	0.350071	-9.6355	1.32093e-12	1.95417e-11	18.4677
CLEC16A_S863	2.08712	-0.657452	9.63396	1.32751e-12	1.96218e-11	18.4627
CHRM1_T455	-4.54948	0.998062	-10.5149	1.62075e-12	2.33423e-11	18.4488
CNNM1_S871	-2.84146	0.343821	-9.84086	1.41707e-12	2.07597e-11	18.4462
KIAA1549_S1554	-2.62693	0.510432	-9.99634	1.50094e-12	2.18595e-11	18.4433
ATP8A1_T28	-3.5481	0.736762	-9.62725	1.35653e-12	2.00156e-11	18.4412
CFL1_T25	-2.18161	0.198214	-9.62401	1.37079e-12	2.01907e-11	18.4308
CEP170B_S986	-2.27152	0.356905	-9.62089	1.38464e-12	2.0377e-11	18.4208
SLC4A10_S261	-2.62264	0.379917	-10.0757	1.57227e-12	2.27608e-11	18.4149
ATP1A3_S210	-4.61958	0.428366	-9.68509	1.41763e-12	2.07597e-11	18.4129
ZYX_S267	1.81278	-0.348452	9.6178	1.39849e-12	2.05449e-11	18.4108
PNN_S66	1.6487	-0.205929	9.6171	1.40169e-12	2.0574e-11	18.4086
ANK2_S2463	-4.70209	1.1717	-9.98378	1.5573e-12	2.25635e-11	18.4066
MAST1_S789	-1.33666	0.215548	-9.6135	1.41804e-12	2.07597e-11	18.397
CACNB2_T219	-2.11548	0.353462	-9.81502	1.53344e-12	2.22751e-11	18.3881
FGD4_S828	-1.88697	0.409083	-10.0593	1.64847e-12	2.37214e-11	18.3872
MIEF1_S59	-1.64995	0.383919	-9.97337	1.60563e-12	2.32039e-11	18.3761
RASGRF2_S776	-2.49438	0.543238	-9.60613	1.45215e-12	2.12406e-11	18.3733
PSD3_S1010	-3.40597	0.436214	-9.60523	1.45638e-12	2.12841e-11	18.3704
PHF3_S283	1.39156	-0.305625	9.7349	1.53615e-12	2.22953e-11	18.3704
RPS6KC1_S282	-1.1998	0.14719	-9.60203	1.47149e-12	2.14863e-11	18.3601
KCNMA1_T1088	-3.60384	0.487175	-9.73064	1.55668e-12	2.25635e-11	18.3571
CAMK2G_T386	-2.69566	0.229474	-9.88308	1.61032e-12	2.32318e-11	18.356
CNRIP1_T95	-3.23126	0.786436	-9.79953	1.60781e-12	2.32155e-11	18.341
CHGB_Y332	-3.39041	0.564881	-9.59464	1.50702e-12	2.19292e-11	18.3363
PDPK1_S241	-1.27542	0.281214	-9.59334	1.51334e-12	2.20022e-11	18.3322
ATP1A1_S40	-5.36656	0.53825	-9.72122	1.60304e-12	2.31863e-11	18.3065
IPCEF1_S412	-2.43984	0.398086	-10.1304	1.79337e-12	2.55696e-11	18.3024
YWHAE_S65	-2.52169	0.5265	-10.4458	1.94059e-12	2.72961e-11	18.2987
VPS39_S441	-2.54707	0.405813	-10.4433	1.95348e-12	2.74089e-11	18.2921
STX4_S36	-2.11718	0.469853	-10.2231	1.86708e-12	2.64164e-11	18.2814
STMN3_S60	-2.97881	0.519184	-9.857	1.74134e-12	2.49301e-11	18.2781
SV2A_S81	-3.57375	0.597437	-10.4371	1.98502e-12	2.78051e-11	18.2762
SAFB_S197	2.77753	-0.424212	10.3217	1.9487e-12	2.73874e-11	18.2752
RAB18_S173	-1.97002	0.366905	-9.57235	1.61947e-12	2.33423e-11	18.2646
WDR59_S564	-1.31743	0.278421	-9.84567	1.8016e-12	2.56621e-11	18.2443
GPR158_S708	-2.76084	0.492548	-9.56287	1.66984e-12	2.40084e-11	18.2341
MAPT_T39	-3.50248	0.694244	-9.62624	1.70864e-12	2.45244e-11	18.2268
ATP1A2_S496	-3.19834	0.390238	-9.55867	1.69263e-12	2.43153e-11	18.2206
STARD3NL_S210	-2.30353	0.459667	-10.0007	1.95079e-12	2.73939e-11	18.2199
FAM160A2_S467	-1.70246	0.300514	-9.91946	1.88132e-12	2.65955e-11	18.2183
ITM2C_T37	-2.45436	0.267846	-9.75835	1.82382e-12	2.58911e-11	18.2155
AHCYL2_S166	-2.89487	0.531447	-9.83511	1.85967e-12	2.63337e-11	18.2127
ACIN1_S710	1.65258	-0.255214	9.55523	1.71157e-12	2.45456e-11	18.2095
CDK17_S165	-1.25908	0.2445	-9.55437	1.71631e-12	2.45927e-11	18.2068
PLEKHA6_S459	-3.09275	0.51045	-9.68316	1.80509e-12	2.56902e-11	18.1882
LRFN4_S575	-2.85155	0.360167	-9.54759	1.75438e-12	2.50955e-11	18.1849
NES_S680	2.33809	-0.432595	9.54361	1.77711e-12	2.53991e-11	18.1721
ANK2_S1858	-3.59131	0.683143	-9.54236	1.7843e-12	2.54802e-11	18.168
KBTBD11_S314	-2.91929	0.331381	-9.54075	1.79358e-12	2.55696e-11	18.1629
ATP1A2_S516	-2.94522	0.367575	-9.66791	1.89313e-12	2.67177e-11	18.1624
PSMD3_S430	-1.64843	0.381257	-10.0725	2.11116e-12	2.93769e-11	18.1588
ATP1A1_S675	-3.79643	0.718829	-10.0778	2.07971e-12	2.89631e-11	18.1548
SRCIN1_Y495	-2.36124	0.496281	-10.39	2.24554e-12	3.1144e-11	18.1537
TRIM33_S1119	2.39779	-0.425357	9.53722	1.8142e-12	2.57981e-11	18.1515
TOMM70_S91	-1.07433	0.142214	-9.53633	1.81941e-12	2.58504e-11	18.1486
PPFIA3_T714	-1.801	0.380929	-9.53065	1.85314e-12	2.62852e-11	18.1303
MAP1A_T576	-2.34439	0.564643	-9.52997	1.85727e-12	2.63217e-11	18.1281
AFDN_S350	-2.86003	0.5795	-9.52558	1.88383e-12	2.66087e-11	18.1139
GABBR2_T819	-3.47744	0.507526	-9.80195	2.05463e-12	2.86849e-11	18.1134
ARHGEF2_S953	-3.06404	0.749395	-9.79973	2.06839e-12	2.88293e-11	18.1068
NES_S548	2.06425	-0.42631	9.52209	1.90519e-12	2.68654e-11	18.1027
WIPF2_S160	-2.22984	0.351714	-10.0578	2.20092e-12	3.06006e-11	18.0984
FBXL20_T417	-1.28669	0.196476	-9.51901	1.92429e-12	2.71121e-11	18.0928
UCHL1_S189	-2.45152	0.240143	-9.51833	1.92854e-12	2.71493e-11	18.0906
CAMKV_T406	-2.61057	0.533146	-9.58292	1.96096e-12	2.7491e-11	18.0895
KCNAB2_S145	-3.40103	0.440471	-10.1364	2.37049e-12	3.25822e-11	18.0617
SYN3_S462	-3.05001	0.586171	-9.57306	2.02347e-12	2.82967e-11	18.0582
MAGI2_S1014	-2.81745	0.439286	-9.50731	1.99857e-12	2.79717e-11	18.055
ARHGEF25_S595	-2.38043	0.562881	-9.49925	2.05143e-12	2.86639e-11	18.029
IFT140_S1443	1.89546	-0.491595	9.49715	2.06543e-12	2.88118e-11	18.0222
PHF21A_S448	1.80647	-0.173686	10.028	2.39398e-12	3.28514e-11	18.0147
FRMD4A_S859	-1.78644	0.242256	-9.68786	2.26408e-12	3.1342e-11	17.979
HDGFL2_S254	-3.99318	1.12644	-9.68749	2.26667e-12	3.1342e-11	17.9779
HCN2_S97	-3.66552	0.474659	-9.54619	2.20424e-12	3.06215e-11	17.9729
UBR4_S181	-1.34601	0.267545	-10.2105	2.62795e-12	3.57711e-11	17.9609
ACSL4_S57	-2.78275	0.545175	-9.60257	2.32231e-12	3.20244e-11	17.9589
BASP1_T162	-4.88303	0.411575	-9.59919	2.34703e-12	3.23388e-11	17.9484
DLGAP1_S154	-3.88836	0.521857	-9.47402	2.22616e-12	3.09005e-11	17.9475
VDAC3_S56	-3.44309	0.37765	-9.59441	2.38246e-12	3.272e-11	17.9335
MINK1_S918	-1.69422	0.247714	-9.46923	2.26099e-12	3.13324e-11	17.9321
ANK2_S2376	-2.5294	0.573105	-9.74138	2.46584e-12	3.37552e-11	17.9317
BORCS5_S75	-2.52434	0.37981	-9.46838	2.26725e-12	3.1342e-11	17.9293
PLIN3_S31	3.0592	-0.585786	9.4668	2.27889e-12	3.1477e-11	17.9242
ATP2B2_S1201	-4.21636	0.536143	-9.46113	2.32122e-12	3.20244e-11	17.9059
YBX1_S165	1.46694	-0.0984048	9.45696	2.35277e-12	3.23914e-11	17.8924
OSBPL3_S410	-2.00718	0.517929	-9.45494	2.36828e-12	3.25783e-11	17.8859
RUFY3_S34	-2.49195	0.365262	-9.44949	2.41048e-12	3.30511e-11	17.8683
CKB_S202	-2.66491	0.19881	-9.44922	2.41266e-12	3.3054e-11	17.8674
44081_S77	-4.08696	0.683818	-10.1731	2.90729e-12	3.91313e-11	17.8603
PSD3_S996	-3.13025	0.539432	-9.79263	2.73547e-12	3.7085e-11	17.8456
REPS1_S540	-2.1721	0.450238	-9.44189	2.47071e-12	3.37945e-11	17.8437
ROGDI_S227	-2.74782	0.446	-9.967	2.84494e-12	3.84146e-11	17.8428
VSNL1_S177	-4.16643	0.760829	-9.97056	2.81632e-12	3.80587e-11	17.8348
SNAP91_S325	-4.69253	0.785905	-9.4379	2.50295e-12	3.42076e-11	17.8308
GCFC2_S180	1.91321	-0.430762	9.43646	2.51463e-12	3.43395e-11	17.8261
RIMS1_S578	-3.75593	0.599769	-9.63049	2.701e-12	3.67062e-11	17.8245
SOWAHC_S226	2.46419	-0.619756	9.49208	2.61943e-12	3.56839e-11	17.8237
CYB5R3_S179	-1.81517	0.305571	-9.43465	2.52947e-12	3.45141e-11	17.8203
VPS13C_S1894	-2.67409	0.287811	-9.78695	2.78184e-12	3.76531e-11	17.809
CNP_S318	-3.27909	0.537475	-9.55047	2.7343e-12	3.7085e-11	17.7964
ARHGEF11_T708	-1.26038	0.216476	-9.42489	2.61087e-12	3.55961e-11	17.7887
KIAA0513_T326	-5.99284	0.973118	-10.0408	3.08757e-12	4.13597e-11	17.7805
NSFL1C_S116	-1.42602	0.325	-9.42122	2.6422e-12	3.59361e-11	17.7768
CTNND2_S415	-2.13833	0.298881	-9.41152	2.72682e-12	3.70272e-11	17.7454
ZDHHC8_S348	-1.82959	0.359306	-9.83376	3.16198e-12	4.22557e-11	17.7398
CPNE5_T583	-2.25869	0.292256	-9.60288	2.94083e-12	3.95511e-11	17.7398
SRRM2_S1124	2.29297	-0.443714	9.40956	2.74422e-12	3.71738e-11	17.739
AKAP12_S283	-2.90011	0.470816	-9.67611	3.00318e-12	4.03318e-11	17.7354
CACNA1E_T28	-2.55932	0.519543	-9.91876	3.26216e-12	4.35256e-11	17.7263
MAPT_T52	-3.17439	0.531343	-9.91707	3.27788e-12	4.36662e-11	17.7215
DENND1A_S541	-2.11433	0.563469	-10.2243	3.47114e-12	4.59504e-11	17.7209
ARFGEF2_S1782	-3.67448	0.470444	-9.83389	3.16085e-12	4.22557e-11	17.7194
MVD_S96	-1.76264	0.258405	-9.4025	2.80787e-12	3.79749e-11	17.7162
VPS13D_S2692	-1.61282	0.330842	-9.66896	3.06879e-12	4.11408e-11	17.7139
DPYSL2_S623	-3.12847	0.468225	-9.52055	3.00366e-12	4.03318e-11	17.7028
GIT1_S397	-2.16413	0.465167	-9.39636	2.86448e-12	3.86476e-11	17.6963
ARHGEF6_S488	-1.82475	0.337381	-9.39546	2.87289e-12	3.87301e-11	17.6934
DOCK7_S180	1.81752	-0.354286	9.39358	2.89052e-12	3.89366e-11	17.6873
CCT4_S236	-2.13269	0.470824	-9.99676	3.48931e-12	4.61547e-11	17.6775
CAMK2B_T287	-3.4797	0.144333	-9.5799	3.15681e-12	4.22537e-11	17.6692
PPP1R13B_S671	-2.03332	0.275629	-9.89185	3.52144e-12	4.64534e-11	17.6503
DMTN_S269	-2.39814	0.455524	-9.38091	3.01213e-12	4.04133e-11	17.6462
MBD3_S56	2.64018	-0.356914	9.8917	3.52291e-12	4.64534e-11	17.6299
PKP4_S1091	-3.66866	0.765176	-9.98408	3.61447e-12	4.75121e-11	17.6235
AXIN1_S486	1.96663	-0.264171	9.86825	3.76603e-12	4.94273e-11	17.6042
RPS28_S23	3.63128	-0.813634	9.41748	3.32494e-12	4.42232e-11	17.5863
GAP43_S239	-2.14637	0.206452	-9.35644	3.26174e-12	4.35256e-11	17.5669
NEURL4_S907	-1.96498	0.44559	-9.54616	3.50342e-12	4.6305e-11	17.5655
MAP1A_S996	-3.00114	0.503071	-9.35574	3.26919e-12	4.35849e-11	17.5646
CBR1_S149	-2.34357	0.375405	-9.35304	3.29806e-12	4.39003e-11	17.5558
SMARCA2_S588	1.77747	-0.376237	9.60825	3.68837e-12	4.84458e-11	17.5308
TGS1_S405	1.64323	-0.264	9.34521	3.38326e-12	4.49636e-11	17.5304
DDN_T438	-4.89495	0.783176	-9.94935	3.98096e-12	5.19217e-11	17.5273
CCDC9_S362	1.67376	-0.294571	9.34342	3.40294e-12	4.51895e-11	17.5246
ATP1A3_S231	-4.48819	0.477057	-9.85297	3.9335e-12	5.14252e-11	17.5201
NEFM_S672	-5.16082	0.581071	-9.34135	3.426e-12	4.54598e-11	17.5179
ARHGAP1_S35	-2.13906	0.446976	-9.33994	3.44183e-12	4.5634e-11	17.5133
EPB41L3_S11	-3.46008	0.41281	-9.33911	3.45115e-12	4.57216e-11	17.5106
IMPA1_S97	-3.29523	0.445333	-9.33339	3.51598e-12	4.64346e-11	17.4921
CKMT1A_T394	-2.22957	0.470438	-10.1366	4.37856e-12	5.65858e-11	17.4901
SPTAN1_S1217	-1.61696	0.13631	-9.32994	3.55578e-12	4.68502e-11	17.4809
CACNG2_S249	-3.96804	0.543711	-9.5916	3.87937e-12	5.07962e-11	17.4805
MAP2_S1134	-2.32311	0.47781	-9.32857	3.57171e-12	4.70143e-11	17.4764
GSK3A_T84	-1.28184	0.223286	-9.32839	3.57381e-12	4.70143e-11	17.4758
MAST3_S680	-2.5778	0.750914	-9.82644	4.24248e-12	5.49534e-11	17.4448
ALS2_S1335	-2.01031	0.385545	-10.0039	4.5997e-12	5.91716e-11	17.4216
PEX5L_S502	-3.69372	0.451905	-9.31015	3.79275e-12	4.97393e-11	17.4166
ALDOC_S132	-1.64126	0.0922143	-9.30635	3.83995e-12	5.03192e-11	17.4042
INTS12_S378	1.87169	-0.20615	9.42175	4.09912e-12	5.33423e-11	17.3933
RALGAPA1_S1984	-2.24394	0.450842	-9.56236	4.23958e-12	5.49534e-11	17.3921
SRRM1_S750	1.64694	-0.28431	9.29945	3.92735e-12	5.13847e-11	17.3818
EPB41L3_T469	-2.28758	0.468619	-9.29801	3.94593e-12	5.15477e-11	17.3771
MAP7D1_S125	-2.2336	0.52881	-9.2977	3.94987e-12	5.15593e-11	17.3761
CNP_S374	-3.72776	0.703939	-9.99255	4.74395e-12	6.07954e-11	17.3726
ATG2B_S1743	-1.73839	0.335119	-9.29508	3.9838e-12	5.19217e-11	17.3676
DLGAP1_S412	-2.21286	0.199394	-9.9824	4.87699e-12	6.23582e-11	17.3634
CDC42EP4_S174	2.74442	-0.5655	9.70354	4.61967e-12	5.92928e-11	17.3629
SCN2B_T204	-4.5298	0.791086	-9.79687	4.61606e-12	5.92916e-11	17.3607
POLDIP3_S127	1.69742	-0.152537	9.34429	4.20415e-12	5.45408e-11	17.3528
SLC25A46_T45	-2.21777	0.182024	-9.28708	4.08917e-12	5.32539e-11	17.3416
PLCD1_S155	-2.40889	0.190333	-9.97974	4.91256e-12	6.27653e-11	17.3378
MAP1B_S1144	-2.17351	0.456189	-9.62089	4.55572e-12	5.87392e-11	17.3376
UBE2O_S87	-1.41847	0.367205	-9.47892	4.31372e-12	5.58333e-11	17.3363
BCL2L13_S450	-2.80028	0.481	-9.2846	4.12234e-12	5.36031e-11	17.3335
MAP1A_S1190	-1.9081	0.357667	-9.28379	4.13331e-12	5.37044e-11	17.3309
CTNND2_S276	-1.81439	0.281405	-9.27898	4.19871e-12	5.45121e-11	17.3152
MAP1A_S1264	-2.67574	0.470273	-9.96332	5.13757e-12	6.52448e-11	17.3117
OTUD7A_T822	-2.17759	0.286595	-9.26782	4.35453e-12	5.63184e-11	17.2789
TNS1_S1124	2.07996	-0.534256	9.4593	4.58402e-12	5.90149e-11	17.2757
SLC20A1_S265	-2.19081	0.517429	-9.26307	4.42263e-12	5.71115e-11	17.2635
PPP1R7_S322	-1.17213	0.195722	-9.67454	5.02812e-12	6.40477e-11	17.2571
DYNC1I1_S197	-3.40056	0.35505	-9.3752	4.74785e-12	6.07992e-11	17.247
PRKAG2_S196	-1.9908	0.220024	-9.25644	4.51939e-12	5.83164e-11	17.2419
EIF4B_S422	3.19363	-0.501306	9.65301	5.35482e-12	6.75966e-11	17.2389
BIN1_S276	-2.69542	0.5408	-9.75325	5.22913e-12	6.62097e-11	17.2365
PPP1R12A_S445	1.57215	-0.271071	9.25376	4.55913e-12	5.87392e-11	17.2332
CLASP1_T798	2.91336	-0.657806	9.6631	5.1991e-12	6.5927e-11	17.2237
TOM1L2_S508	-2.36169	0.233833	-9.25021	4.61231e-12	5.92886e-11	17.2216
PPP1R9A_S440	-2.40024	0.503636	-9.93219	5.59329e-12	7.01055e-11	17.2085
LAMTOR1_S27	-2.23786	0.396238	-9.24194	4.7387e-12	6.07743e-11	17.1947
EFR3B_S214	-2.96891	0.416892	-9.5719	5.27287e-12	6.66619e-11	17.192
SPTBN1_T349	-2.12107	0.368474	-9.49316	5.23318e-12	6.62097e-11	17.1824
SLC12A7_T30	2.11579	-0.492375	9.3611	4.96415e-12	6.33765e-11	17.1797
PEX19_S54	-3.684	0.942762	-9.23665	4.82132e-12	6.16931e-11	17.1774
SLC45A4_S732	-3.09042	0.448778	-9.63883	5.58177e-12	7.00421e-11	17.1748
EIF4B_S93	-1.96205	0.492263	-9.49034	5.27837e-12	6.66814e-11	17.1738
KCNK4_S319	-3.35461	0.676879	-9.91919	5.79567e-12	7.22958e-11	17.1731
SNX17_S415	-2.02993	0.319057	-9.72792	5.62236e-12	7.02899e-11	17.1642
SLC9A3R1_S294	-2.59764	0.620105	-9.48421	5.37787e-12	6.78368e-11	17.1552
NEU3_S450	-3.30304	0.548463	-9.2895	5.01344e-12	6.3909e-11	17.1539
DBNL_S292	2.35837	-0.628927	9.28191	5.13743e-12	6.52448e-11	17.1532
CRYAB_S76	-3.28845	0.737881	-9.22713	4.97388e-12	6.34527e-11	17.1464
BAIAP3_S115	-1.71048	0.427439	-9.28641	5.06355e-12	6.44017e-11	17.144
FKBP1A_S9	-1.85584	0.298619	-9.22227	5.05346e-12	6.43219e-11	17.1306
CKMT1A_T386	-2.62243	0.390914	-9.70837	5.94647e-12	7.40673e-11	17.1294
ABL2_S783	1.69104	-0.325857	9.71526	5.83012e-12	7.26718e-11	17.1281
STK39_S385	-1.51978	0.261421	-9.47511	5.52918e-12	6.95893e-11	17.1276
CNP_S312	-4.47709	0.9217	-9.34442	5.23299e-12	6.62097e-11	17.1271
TRIM2_S402	-1.54278	0.325395	-9.47358	5.55513e-12	6.98637e-11	17.1229
USP8_S434	2.18098	-0.303262	9.21678	5.14512e-12	6.52916e-11	17.1127
SPINDOC_S152	-1.88501	0.330211	-9.46653	5.67578e-12	7.08527e-11	17.1015
CACNA1G_S2046	-1.80521	0.303971	-9.69535	6.17261e-12	7.67142e-11	17.0923
UBE3C_S672	-1.96879	0.406722	-9.60798	6.10985e-12	7.59901e-11	17.063
SIN3A_S277	2.04158	-0.232463	9.2607	5.5004e-12	6.93306e-11	17.0615
MAP1B_S1522	-2.54407	0.422886	-9.68333	6.38941e-12	7.9059e-11	17.0579
ALB_S29	3.26491	-0.424865	9.50994	6.34643e-12	7.86425e-11	17.0547
ADGRL1_S1377	-2.38824	0.383561	-9.25686	5.56881e-12	6.99492e-11	17.0492
ELFN2_S668	-2.48586	0.329105	-9.44858	5.99531e-12	7.46206e-11	17.047
MAGI1_S148	-3.42323	0.483762	-9.1957	5.51257e-12	6.9432e-11	17.0439
VPS13D_S1138	-1.17776	0.255619	-9.19252	5.57022e-12	6.99492e-11	17.0336
RTN3_S453	-3.02592	0.311714	-9.19116	5.59514e-12	7.01055e-11	17.0291
DOCK11_S445	-1.68269	0.454333	-9.19076	5.60245e-12	7.01176e-11	17.0278
ARHGAP1_S51	-1.51102	0.395214	-9.19065	5.60442e-12	7.01176e-11	17.0275
GMPS_S332	-1.45205	0.211395	-9.43858	6.18133e-12	7.6766e-11	17.0166
TPPP_T14	-3.29633	0.68669	-9.18724	5.66729e-12	7.07992e-11	17.0163
DOCK10_S305	-2.17446	0.389946	-9.50805	6.38246e-12	7.9031e-11	17.0017
SV2A_Y480	-2.97773	0.538361	-9.58612	6.5145e-12	8.03122e-11	16.9991
TRAPPC10_S685	-1.82927	0.187711	-9.42665	6.41069e-12	7.92642e-11	16.9803
AMPH_T274	-2.91576	0.454211	-9.42608	6.42175e-12	7.93427e-11	16.9786
PPFIA1_S741	-1.69365	0.219471	-9.74262	7.09768e-12	8.66824e-11	16.9715
TANC2_S169	-2.26884	0.332541	-9.48117	6.91802e-12	8.50381e-11	16.9447
IQSEC2_S372	-2.51188	0.239886	-9.64614	7.10989e-12	8.67643e-11	16.9304
CRYAB_T158	-4.97878	0.831694	-9.56947	6.84068e-12	8.41488e-11	16.9301
NUAK1_S445	-2.23352	0.395795	-9.34655	6.50731e-12	8.02822e-11	16.9264
KIF21B_S968	-3.30769	0.645303	-9.82287	7.54634e-12	9.14946e-11	16.9101
HNRNPH2_S90	-1.85224	0.535622	-9.47722	7.00043e-12	8.57388e-11	16.9097
RHOG_T138	-3.02715	0.713524	-9.15403	6.31899e-12	7.84178e-11	16.9079
SLC12A5_S1045	-3.78741	0.599286	-9.15353	6.32935e-12	7.84886e-11	16.9062
NCAM2_T819	-2.93906	0.219816	-9.4008	6.93769e-12	8.51237e-11	16.9016
SRCIN1_S298	-2.80991	0.619618	-9.72324	7.49503e-12	9.09379e-11	16.897
ATP6V1H_S483	-3.12022	0.400919	-9.4726	7.09803e-12	8.66824e-11	16.8959
ALKBH5_S384	2.57867	-0.4476	9.25053	7.0457e-12	8.6168e-11	16.8797
SCYL2_S681	1.67384	-0.304952	9.14529	6.50264e-12	8.02822e-11	16.8793
PRKCE_S346	-3.47659	0.590725	-9.25529	6.94012e-12	8.51237e-11	16.869
PRPF40B_S873	-1.70177	0.155312	-9.89512	8.33689e-12	1.00001e-10	16.8688
NAPA_S195	-2.81366	0.432976	-9.19955	6.69865e-12	8.24619e-11	16.865
BAIAP2_S325	-3.59812	0.783238	-9.13641	6.69476e-12	8.24619e-11	16.8503
LRRFIP2_S320	2.48469	-0.669162	9.44601	7.68777e-12	9.29421e-11	16.8164
MAPRE2_S195	-2.16108	0.302119	-9.12571	6.93406e-12	8.51237e-11	16.8153
PCLO_S4397	-2.64879	0.373833	-9.52317	7.83818e-12	9.46926e-11	16.8148
PSD_S993	-3.02857	0.453857	-9.12373	6.97928e-12	8.55418e-11	16.8088
MAPT_S739	-3.69416	0.223667	-9.12222	7.01377e-12	8.58398e-11	16.8039
PAK1_T185	-2.74394	0.4246	-9.23397	7.42612e-12	9.02389e-11	16.8016
CLASP2_S1234	-2.81776	0.208659	-9.17821	7.17647e-12	8.74503e-11	16.7964
UBR3_T1161	-1.51272	0.211147	-9.67998	8.46589e-12	1.0126e-10	16.7962
ADGRA1_S346	-2.53424	0.300476	-9.11779	7.11659e-12	8.67833e-11	16.7894
STMN4_S117	-3.47807	0.7054	-9.58856	8.39167e-12	1.00587e-10	16.7869
DMXL2_S2713	-3.85193	0.555971	-9.67477	8.59111e-12	1.02685e-10	16.7816
LIMD1_S316	1.98986	-0.229762	9.11437	7.19699e-12	8.7637e-11	16.7782
AMPH_S262	-2.08874	0.479071	-9.10919	7.32028e-12	8.9074e-11	16.7613
RTN1_S493	-2.80384	0.401485	-9.75719	9.04076e-12	1.07602e-10	16.7497
RANGAP1_S442	-2.38506	0.75269	-9.1048	7.42672e-12	9.02389e-11	16.7469
HCN2_S779	-2.52341	0.491211	-9.34977	8.1108e-12	9.75852e-11	16.746
GPR158_S705	-2.76069	0.463632	-9.34971	8.11233e-12	9.75852e-11	16.7458
STX7_T79	-2.47431	0.333675	-9.21597	7.86314e-12	9.49262e-11	16.7447
BCL11A_S608	-2.37615	0.646342	-9.34914	8.12655e-12	9.76866e-11	16.7441
ANK2_S2447	-3.51523	0.708438	-9.85549	9.27311e-12	1.09825e-10	16.744
SHROOM4_S282	1.99666	-0.36931	9.10329	7.46353e-12	9.06209e-11	16.742
PAICS_S283	-1.87785	0.282297	-9.41962	8.32216e-12	9.98956e-11	16.7374
ADGRA1_T223	-1.84744	0.466086	-9.57465	8.73504e-12	1.04258e-10	16.7253
NSUN4_S206	-1.45703	0.098	-9.8406	9.65183e-12	1.13119e-10	16.7236
KIAA1217_S1030	-3.51403	0.572757	-9.41488	8.44163e-12	1.01042e-10	16.7232
CLCN7_S9	2.15793	-0.158262	9.0971	7.61683e-12	9.22829e-11	16.7217
SRRM1_S617	-1.817	0.403024	-9.09645	7.63328e-12	9.24159e-11	16.7196
MAP1A_S1029	-2.97599	0.526167	-9.09479	7.67488e-12	9.28528e-11	16.7142
TBC1D17_S602	-2.53818	0.499421	-9.33798	8.40926e-12	1.00726e-10	16.71
MPP3_T548	-3.70735	0.611485	-9.74084	9.45751e-12	1.11597e-10	16.7049
KIF2A_S573	-2.56988	0.445675	-9.20858	8.04993e-12	9.69729e-11	16.6978
MATK_S502	-1.483	0.273361	-9.47115	9.1362e-12	1.08662e-10	16.6849
CADPS2_S839	-3.83135	1.04719	-9.82975	9.9378e-12	1.15667e-10	16.6752
GIT2_S381	1.81091	-0.37681	9.08268	7.98644e-12	9.63458e-11	16.6745
ACSL3_S683	-2.1906	0.373595	-9.08085	8.03478e-12	9.68595e-11	16.6685
KIAA1549_S1624	-2.59581	0.555242	-9.7256	9.86331e-12	1.15038e-10	16.6631
NSMF_S292	-2.71996	0.364029	-9.54458	9.52704e-12	1.12202e-10	16.6607
GRM5_S1041	-2.17279	0.293906	-9.83005	9.92984e-12	1.15654e-10	16.6573
SRRM1_S752	-2.40999	0.655324	-9.62865	9.78548e-12	1.14288e-10	16.6522
HSPA5_S86	-1.83617	0.404118	-9.6349	9.61409e-12	1.12912e-10	16.6489
DMXL2_S929	1.64694	-0.244629	9.54694	9.46241e-12	1.11597e-10	16.6456
YWHAE_Y131	-3.10539	0.438914	-9.54653	9.47372e-12	1.11652e-10	16.6444
KNDC1_S780	-2.35642	0.222857	-9.0707	8.30726e-12	9.97877e-11	16.6353
SLC39A10_S591	-2.75295	0.463171	-9.54258	9.5823e-12	1.12617e-10	16.633
RTN1_S335	-2.72176	0.538229	-9.54058	9.63789e-12	1.13034e-10	16.6273
TNKS1BP1_S1554	2.54658	-0.385561	9.11583	8.78002e-12	1.04721e-10	16.6197
SYN1_S55	-2.60666	0.478436	-9.2464	8.89414e-12	1.05932e-10	16.6148
CBR3_S192	-1.67318	0.227889	-9.45128	9.68787e-12	1.13462e-10	16.6037
SYN1_S427	-2.71107	0.665095	-9.05722	8.68374e-12	1.03719e-10	16.5911
CELSR2_S2648	-1.23745	0.165714	-9.0517	8.84294e-12	1.05397e-10	16.573
C9orf78_S15	2.59023	-0.413206	9.58917	1.09411e-11	1.26125e-10	16.5635
KIAA1217_T470	-1.89502	0.422972	-9.43404	1.01936e-11	1.18399e-10	16.553
ZNF592_S460	2.0928	-0.292049	9.09449	9.40812e-12	1.11112e-10	16.551
EPHA5_S961	-2.11808	0.291706	-9.59034	1.09051e-11	1.25882e-10	16.5444
COMMD10_S155	-1.51144	0.277632	-9.28177	9.99286e-12	1.16227e-10	16.5382
RYR2_S2694	-4.09482	0.586976	-9.04064	9.17075e-12	1.08996e-10	16.5367
LARP1_S440	-1.82148	0.384167	-9.04014	9.18581e-12	1.09058e-10	16.5351
FAM171A1_T448	-2.16852	0.343833	-9.04004	9.18896e-12	1.09058e-10	16.5348
FAM122A_S79	1.81631	-0.3102	9.14929	9.72133e-12	1.13773e-10	16.5335
ADD2_S693	-3.37247	0.532525	-9.14908	9.72792e-12	1.13773e-10	16.5328
SCAF1_S719	2.55458	-0.473833	9.03941	9.20776e-12	1.09185e-10	16.5327
GPHN_S188	-1.40287	0.339524	-9.03925	9.2126e-12	1.09185e-10	16.5322
SRRM2_S1864	2.04102	-0.278421	9.27825	1.01015e-11	1.1741e-10	16.5274
BCL11A_S86	-2.42126	0.81769	-9.03513	9.33866e-12	1.10449e-10	16.5187
NEK6_S240	1.72471	-0.0997619	9.03512	9.33888e-12	1.10449e-10	16.5186
SIRT2_S372	-3.27619	0.608405	-9.03361	9.38544e-12	1.10922e-10	16.5137
SUB1_S15	-4.85693	1.05514	-9.42026	1.06173e-11	1.22982e-10	16.5125
REEP4_S152	2.07525	-0.193294	9.57811	1.1289e-11	1.29781e-10	16.51
PPP1R15B_S508	-1.4114	0.237273	-9.66571	1.16384e-11	1.33434e-10	16.4985
MACF1_S31	-1.89907	0.245762	-9.02803	9.55937e-12	1.12504e-10	16.4954
SRGAP3_S874	-2.29596	0.476143	-9.0277	9.56967e-12	1.12547e-10	16.4943
TRIM28_T541	2.38869	-0.230286	9.02584	9.62847e-12	1.13002e-10	16.4882
SLC6A9_S673	-2.70874	0.377895	-9.26166	1.06302e-11	1.23047e-10	16.4766
SUPV3L1_S725	-1.20431	0.27131	-9.02098	9.78391e-12	1.14288e-10	16.4723
KCNC1_S44	-2.73955	0.310833	-9.02004	9.81426e-12	1.14545e-10	16.4692
FMN2_T753	-2.2224	0.128714	-9.01753	9.89558e-12	1.15335e-10	16.4609
SOWAHB_S742	-4.2498	0.846529	-9.56031	1.18729e-11	1.35846e-10	16.4386
BSN_S2619	-2.77942	0.318725	-9.12547	1.04881e-11	1.21568e-10	16.434
PPP1R10_S313	1.7461	-0.218286	9.00507	1.03103e-11	1.19672e-10	16.42
BNIP3L_S118	-2.0702	0.293194	-9.37991	1.19632e-11	1.36693e-10	16.4168
TACC1_S169	2.24017	-0.547976	9.00366	1.03583e-11	1.20146e-10	16.4154
NOS1_S292	-3.48943	0.672857	-8.99268	1.07399e-11	1.24231e-10	16.3794
ARHGAP32_T1236	-1.81789	0.290548	-8.99065	1.0812e-11	1.24979e-10	16.3727
SAMHD1_T592	2.20723	-0.136857	8.98818	1.09006e-11	1.25882e-10	16.3646
WDR81_S1272	-1.50159	0.279405	-8.98752	1.09244e-11	1.2602e-10	16.3624
MAPT_S61	-4.31369	0.666667	-9.15559	1.18194e-11	1.35325e-10	16.3547
CEP170B_S829	-1.6564	0.321762	-8.98431	1.10404e-11	1.27184e-10	16.3519
ARHGDIA_Y133	-1.84329	0.28781	-8.98404	1.10504e-11	1.27212e-10	16.351
WDR37_S244	-2.74447	0.420714	-9.44167	1.28332e-11	1.45549e-10	16.342
C2orf88_S40	-2.56654	0.200658	-9.21629	1.22233e-11	1.39476e-10	16.3375
CLASP2_S1176	1.54582	-0.330762	8.97977	1.12069e-11	1.28925e-10	16.337
RTN4_T116	1.83183	-0.284262	8.97512	1.13802e-11	1.3074e-10	16.3217
FGF13_S218	-2.13389	0.562324	-9.51862	1.33633e-11	1.50692e-10	16.3208
SRCIN1_S866	-3.03477	0.591095	-8.97412	1.14177e-11	1.31082e-10	16.3184
UHRF1BP1L_S423	-4.1043	0.498359	-9.13896	1.24528e-11	1.41711e-10	16.3027
ANK2_S1459	-2.06901	0.463947	-9.20477	1.26652e-11	1.43934e-10	16.3022
PSD3_S747	-4.66319	0.525952	-8.96894	1.16146e-11	1.33252e-10	16.3013
ANK2_S1891	-4.78959	0.680341	-9.0219	1.19052e-11	1.36123e-10	16.2919
AMOTL1_S828	2.07973	-0.344262	8.96498	1.17672e-11	1.3482e-10	16.2883
TP53BP1_T1061	2.07598	-0.248463	9.00874	1.2425e-11	1.41491e-10	16.2741
LMTK2_S886	-2.04118	0.435789	-9.19381	1.31003e-11	1.48379e-10	16.2685
CDK14_S95	-1.86469	0.32	-8.95515	1.21554e-11	1.38795e-10	16.256
LSAMP_S205	-4.19018	0.767618	-9.49566	1.42641e-11	1.59631e-10	16.2558
AHCTF1_S1241	1.78453	-0.450095	8.95161	1.22984e-11	1.40238e-10	16.2444
BCLAF1_S760	1.91613	-0.19569	8.94983	1.23705e-11	1.40965e-10	16.2385
TPM1_S174	-1.95692	0.449316	-9.18243	1.35683e-11	1.52248e-10	16.2336
CIT_S1474	-2.30109	0.3695	-9.05285	1.32243e-11	1.49683e-10	16.2271
DLG1_S598	-1.81628	0.328676	-9.24935	1.39093e-11	1.55971e-10	16.2258
AKT3_T447	-1.48078	0.248976	-8.94468	1.25828e-11	1.43095e-10	16.2216
PXN_S336	1.83174	-0.271333	8.94244	1.26762e-11	1.43962e-10	16.2142
PGM2L1_T122	-2.87193	0.452514	-9.3959	1.46579e-11	1.63712e-10	16.2095
RIMS1_S731	-3.28776	0.483846	-9.11639	1.33671e-11	1.50692e-10	16.2086
CASKIN1_S646	-2.21515	0.109524	-8.93897	1.28223e-11	1.45524e-10	16.2028
MYCBP2_S2812	2.01611	-0.415902	8.98402	1.34645e-11	1.51386e-10	16.1941
PPP1R3E_S66	-1.74173	0.217167	-8.93284	1.30845e-11	1.483e-10	16.1826
SGIP1_T461	-3.30593	0.356595	-8.92789	1.33003e-11	1.50442e-10	16.1663
PCNP_S119	1.4372	-0.235881	8.92726	1.33277e-11	1.50628e-10	16.1643
PPFIA1_S693	-0.964131	0.131357	-8.92711	1.33346e-11	1.50628e-10	16.1638
ABCA2_S1269	-2.3013	0.621195	-8.9822	1.35444e-11	1.52138e-10	16.1633
ATP2B4_S328	-1.83933	0.201476	-8.92674	1.33509e-11	1.50692e-10	16.1625
PPP1R12A_S422	-1.6228	0.486833	-8.92579	1.33929e-11	1.50882e-10	16.1594
SRRM2_S1014	2.0168	-0.332929	8.92529	1.34151e-11	1.51032e-10	16.1578
KIF1A_S1578	-2.8707	0.300865	-9.22646	1.49079e-11	1.66394e-10	16.1567
ABCF1_S140	1.6556	-0.227619	8.92455	1.34476e-11	1.51297e-10	16.1553
PRUNE2_S2189	-1.99604	0.511238	-8.92227	1.35494e-11	1.52138e-10	16.1478
SGIP1_S304	-5.13107	0.757667	-9.29179	1.55367e-11	1.72955e-10	16.1332
PRDX2_T120	-2.3185	0.301605	-9.1461	1.51786e-11	1.69192e-10	16.1219
HECTD4_T2368	-1.47016	0.325095	-8.91257	1.39906e-11	1.56779e-10	16.1159
EPS15L1_T113	-1.72946	0.28325	-9.27779	1.61968e-11	1.79591e-10	16.1155
IWS1_S157	-1.96982	0.533952	-8.91211	1.40122e-11	1.56916e-10	16.1144
FOXK1_S101	1.4704	-0.214571	8.9062	1.42887e-11	1.59801e-10	16.0949
HTT_S1866	2.22603	-0.339806	9.26944	1.66039e-11	1.83623e-10	16.0908
PCLO_S1442	-3.76411	0.418	-9.61208	1.79088e-11	1.96125e-10	16.0894
PALM2-AKAP2_S366	2.42188	-0.199762	8.90448	1.437e-11	1.60604e-10	16.0892
BMP2K_S949	2.83263	-0.458703	9.18953	1.66743e-11	1.8416e-10	16.0699
PLCB1_T509	-2.94086	0.2766	-9.33785	1.73562e-11	1.90816e-10	16.0641
PLEKHA6_S591	-2.31037	0.33403	-9.5001	1.84368e-11	2.01383e-10	16.0634
RAPGEF2_S1277	-2.18198	0.207528	-9.26777	1.66864e-11	1.84173e-10	16.062
C2CD5_S314	1.87339	-0.446882	9.41915	1.77353e-11	1.94511e-10	16.0607
SRRM2_S1423	-1.72181	0.379425	-8.99969	1.56766e-11	1.74397e-10	16.0578
VCL_S809	-1.47821	0.253719	-9.59962	1.85267e-11	2.02234e-10	16.0556
MPP5_S25	-2.54374	0.493718	-9.06539	1.56921e-11	1.74454e-10	16.0487
VPS13D_S1709	-1.13338	0.221262	-8.89196	1.49774e-11	1.67059e-10	16.048
LEO1_S205	1.77394	-0.146895	9.11777	1.65676e-11	1.83462e-10	16.0346
TRA2A_S236	2.06339	-0.311762	8.88561	1.52954e-11	1.70381e-10	16.0271
TP53BP1_S644	2.19922	-0.25875	8.98195	1.65929e-11	1.83622e-10	16.0012
CAMK2G_S36	-3.06866	0.329838	-9.17404	1.74772e-11	1.91897e-10	15.9983
SLC16A1_S483	-2.52049	0.2475	-8.87403	1.58925e-11	1.76566e-10	15.9889
STK10_S20	2.20179	-0.507357	8.87323	1.59346e-11	1.76918e-10	15.9863
RAI1_S1164	2.34333	-0.51878	8.91836	1.66723e-11	1.8416e-10	15.9815
GPI_S494	-2.15202	0.399758	-9.47741	1.96416e-11	2.13852e-10	15.978
DFFA_S110	1.93811	-0.397976	8.86924	1.61469e-11	1.79156e-10	15.9731
IVNS1ABP_S338	1.37349	-0.234714	8.86785	1.62209e-11	1.79741e-10	15.9685
FBXO41_S478	-3.64114	0.608289	-9.09562	1.77427e-11	1.94511e-10	15.9664
KCTD8_S78	-2.99794	0.657853	-9.37945	1.98638e-11	2.15991e-10	15.948
DLGAP3_S58	-1.9503	0.377146	-8.91518	1.68461e-11	1.8545e-10	15.9459
C1orf226_S61	2.88405	-0.695071	8.85882	1.67131e-11	1.84347e-10	15.9387
MAP1B_S970	-2.56331	0.560857	-8.85739	1.67928e-11	1.85105e-10	15.934
CLN6_S31	2.31101	-0.404429	8.85719	1.68038e-11	1.85106e-10	15.9334
DMTN_S92	-2.63798	0.164564	-9.02627	1.77499e-11	1.94511e-10	15.9258
SYNRG_S852	1.62039	-0.1085	8.8513	1.71348e-11	1.88505e-10	15.9139
ESYT1_S1044	-2.07834	0.412238	-8.84681	1.73917e-11	1.91082e-10	15.8991
PHF13_S127	3.20102	-0.463073	8.89198	1.81694e-11	1.98849e-10	15.8959
PKM_Y222	-1.91291	0.260974	-9.01555	1.83599e-11	2.00673e-10	15.8922
MYRIP_S350	-3.42281	0.587029	-9.3524	2.14604e-11	2.32006e-10	15.8711
AFF4_T674	1.78358	-0.239343	9.277	2.07284e-11	2.24524e-10	15.8642
DNAJB4_S38	-4.15062	0.616947	-9.06074	1.97671e-11	2.15079e-10	15.8588
SCRIB_S1140	-1.38589	0.198643	-8.83096	1.83288e-11	2.00464e-10	15.8468
DLGAP3_S755	-2.13621	0.633594	-9.52622	2.26308e-11	2.42484e-10	15.8363
RHOB_T141	-3.3256	0.587875	-9.51838	2.31204e-11	2.47258e-10	15.8353
EPS15L1_S229	-2.11432	0.114857	-8.82208	1.88762e-11	2.05917e-10	15.8175
ZC3H13_T317	1.45296	-0.0698333	8.82064	1.89667e-11	2.0677e-10	15.8127
CHORDC1_S110	-2.16562	0.346667	-8.81381	1.94012e-11	2.1137e-10	15.7902
PPP1R2_S130	-2.80067	0.440757	-9.10165	2.17807e-11	2.34716e-10	15.779
RPS6KC1_S449	-1.74855	0.445816	-9.03441	2.14483e-11	2.32006e-10	15.7775
CLASP2_S561	-2.38334	0.200289	-9.02896	2.18145e-11	2.34931e-10	15.7606
MARCKS_S101	-1.97009	0.218405	-8.80336	2.0085e-11	2.18257e-10	15.7556
TMEM94_S455	-1.82164	0.177381	-8.80122	2.02282e-11	2.1967e-10	15.7486
TP53BP1_S557	1.27082	-0.140833	8.79969	2.0331e-11	2.20645e-10	15.7435
STAC2_S18	-2.57501	0.344333	-8.79824	2.0429e-11	2.21566e-10	15.7387
ZRANB2_S153	1.26111	-0.235905	8.79534	2.06269e-11	2.23569e-10	15.7291
PCLO_S4395	-2.13967	0.304853	-9.2989	2.50134e-11	2.65483e-10	15.7187
EIF4G2_T397	2.53966	-0.350756	8.83401	2.19551e-11	2.36144e-10	15.7075
PRKCB_T641	-4.02766	0.55319	-8.78447	2.13845e-11	2.31482e-10	15.6932
DCLK2_S372	2.81392	-0.701952	8.78281	2.15024e-11	2.32311e-10	15.6877
TRIM9_S438	-2.3355	0.25497	-9.36456	2.69361e-11	2.84278e-10	15.6872
IRF2BPL_T203	1.33585	-0.0537381	8.78251	2.15237e-11	2.32392e-10	15.6867
CAMK2G_S382	-1.72381	0.190103	-8.94976	2.25979e-11	2.42284e-10	15.6851
DNAJA4_S108	-2.51283	0.232091	-9.37925	2.58484e-11	2.73656e-10	15.6831
SRCIN1_S844	-2.1429	0.352738	-8.78125	2.16141e-11	2.3322e-10	15.6825
CHGA_S398	-2.24678	0.392119	-8.7799	2.1711e-11	2.34115e-10	15.6781
PEAK1_S779	-1.6689	0.499167	-8.77701	2.19202e-11	2.35919e-10	15.6685
PCLO_S3615	-2.1224	0.296952	-8.77584	2.20053e-11	2.36533e-10	15.6647
AKAP12_T1730	-3.12244	0.286429	-8.77537	2.20398e-11	2.36752e-10	15.6631
AKAP12_S743	-2.66525	0.339687	-9.45944	2.71663e-11	2.85992e-10	15.6542
BRD2_S668	1.47833	-0.106786	8.77158	2.2319e-11	2.39599e-10	15.6506
RAD23A_S133	-1.40945	0.321905	-8.77134	2.23366e-11	2.39635e-10	15.6498
SRSF9_S197	2.18102	-0.201375	8.86078	2.44859e-11	2.60869e-10	15.6416
THRAP3_S698	2.29208	-0.497659	8.81373	2.346e-11	2.5073e-10	15.6415
ADD3_S600	-4.15034	0.550333	-9.12485	2.55588e-11	2.7093e-10	15.6372
SPTBN1_Y1805	-2.54726	0.629545	-9.34438	2.85059e-11	2.98604e-10	15.631
CHCHD6_S13	-1.62758	0.335562	-9.45044	2.78449e-11	2.92224e-10	15.6296
ARHGAP23_S623	-1.3761	0.435333	-8.76319	2.29496e-11	2.45742e-10	15.6228
PCF11_S836	1.34583	-0.285452	8.76209	2.30337e-11	2.46487e-10	15.6192
CAMK2G_S357	-2.74841	0.220375	-9.42944	2.94952e-11	3.07848e-10	15.593
PRKCE_S337	-2.05558	0.336238	-8.75332	2.37147e-11	2.53293e-10	15.5901
CHGB_S405	-3.42285	0.373286	-8.75296	2.37426e-11	2.53429e-10	15.589
CRKL_Y198	1.88037	-0.436119	8.74545	2.43428e-11	2.59533e-10	15.5641
TTC7B_S678	-1.62972	0.336286	-8.74542	2.43452e-11	2.59533e-10	15.564
PTDSS1_S425	-1.24448	0.192585	-8.79531	2.49165e-11	2.65068e-10	15.5559
MAP1B_Y1336	-2.84083	0.694476	-8.74162	2.46547e-11	2.62501e-10	15.5514
JPT1_S88	1.89316	-0.0960714	8.73831	2.49273e-11	2.65068e-10	15.5405
SNAP23_S110	1.68531	-0.412381	8.73774	2.49748e-11	2.65406e-10	15.5386
BRAF_S750	-1.53177	0.333357	-8.73752	2.49926e-11	2.65429e-10	15.5379
KIAA1549L_S1657	-4.23735	0.550081	-9.02185	2.77821e-11	2.91746e-10	15.5366
GAP43_S183	-3.74555	0.769242	-9.31435	3.1016e-11	3.22295e-10	15.5234
PCLO_S3652	-2.85686	0.462308	-8.89722	2.6685e-11	2.81805e-10	15.5193
NRCAM_S1295	-2.56105	0.395524	-8.73133	2.55118e-11	2.70602e-10	15.5174
PACSIN1_S337	-3.06787	0.39245	-8.8297	2.70634e-11	2.85187e-10	15.5142
MAP1B_S2414	-1.86262	0.417417	-9.0822	2.9041e-11	3.03831e-10	15.51
MLIP_S146	-1.23346	0.145071	-8.72877	2.57301e-11	2.72574e-10	15.5089
ADNP_S921	1.57279	-0.0167179	8.89266	2.70729e-11	2.85187e-10	15.505
DYNC1LI1_S207	-1.78295	0.395667	-8.72532	2.60271e-11	2.75312e-10	15.4975
PHACTR3_S230	-1.75911	0.292619	-8.7252	2.60375e-11	2.75312e-10	15.4971
CHRM1_S322	-3.21024	0.430974	-8.94353	2.84488e-11	2.98191e-10	15.4962
TNKS1BP1_S1666	1.98715	-0.420585	8.76842	2.72088e-11	2.86208e-10	15.494
TRIO_S2282	-1.60644	0.187905	-8.71808	2.6661e-11	2.81728e-10	15.4735
CDK13_S383	1.47368	-0.162667	8.71417	2.70099e-11	2.84879e-10	15.4605
EPB41L1_T79	-2.89432	0.479667	-8.71184	2.72208e-11	2.86208e-10	15.4528
TNRC6C_S1008	1.83362	-0.243537	8.75503	2.84287e-11	2.98166e-10	15.4503
CCDC177_S232	-2.50876	0.3605	-8.71087	2.73082e-11	2.86949e-10	15.4496
CEP170_S1407	2.38307	-0.313444	9.04451	3.25168e-11	3.36233e-10	15.4224
DPYSL2_T617	-2.56153	0.5159	-8.79422	3.03428e-11	3.15689e-10	15.4004
STXBP1_S507	-2.52983	0.338167	-8.69578	2.87141e-11	3.00598e-10	15.3996
LYSMD2_S21	-2.49391	0.184	-8.91017	3.1564e-11	3.27586e-10	15.3927
CTDSPL2_S9	2.54719	-0.594184	8.90816	3.17625e-11	3.29241e-10	15.3865
SRGAP3_S718	-2.17533	0.474	-9.3612	3.55791e-11	3.65656e-10	15.3852
TCOF1_S419	-3.77543	0.68881	-8.69065	2.92084e-11	3.05393e-10	15.3826
JPH1_S452	-2.59124	0.252658	-8.90596	3.19806e-11	3.31094e-10	15.3796
SH3KBP1_S255	2.2121	-0.558143	8.68861	2.94081e-11	3.07291e-10	15.3758
PARD6A_S278	-1.62082	0.386167	-8.68769	2.94979e-11	3.07848e-10	15.3728
ARFGEF3_S1066	-2.49364	0.223714	-8.68527	2.97361e-11	3.10142e-10	15.3647
MAPRE2_S9	-1.42724	0.286929	-8.6844	2.98224e-11	3.1085e-10	15.3619
SHANK3_S1133	-1.85476	0.429225	-8.7899	3.07684e-11	3.19919e-10	15.3612
NEFM_S553	-5.09639	0.317024	-8.6795	3.03138e-11	3.15614e-10	15.3456
ADD2_S530	-2.50195	0.238738	-8.67947	3.03169e-11	3.15614e-10	15.3455
OTUD7A_T796	-2.72591	0.391531	-9.32793	3.89934e-11	3.95682e-10	15.3384
PSMB6_S58	-1.85563	0.464848	-9.23907	3.83433e-11	3.90024e-10	15.3124
VPS50_S494	-1.1882	0.187524	-8.66949	3.13404e-11	3.25466e-10	15.3124
TRIM24_S744	2.32484	-0.125415	8.71263	3.2669e-11	3.376e-10	15.312
MRTFA_T485	-1.33526	0.315976	-8.66713	3.15877e-11	3.2763e-10	15.3046
CEP128_S1008	1.82124	-0.226357	8.66475	3.18395e-11	3.29836e-10	15.2967
ADD1_T11	-2.32496	0.291462	-8.82623	3.34207e-11	3.44945e-10	15.295
CLTA_S105	-1.90104	0.496212	-9.23184	3.91333e-11	3.96863e-10	15.2921
OSBPL8_S810	-3.18217	0.770583	-8.99734	3.74676e-11	3.82501e-10	15.2814
CLIP2_S18	3.55334	-0.616976	8.65899	3.24568e-11	3.35818e-10	15.2775
CEP131_S89	2.12628	-0.308237	8.87136	3.5626e-11	3.65915e-10	15.2721
RBM12_S424	-1.69763	0.316763	-8.86895	3.58944e-11	3.68447e-10	15.2647
NCAM2_T805	-2.90688	0.30169	-8.65489	3.29025e-11	3.39805e-10	15.2639
KIDINS220_S919	2.18554	-0.539514	8.92378	3.75074e-11	3.82675e-10	15.2638
HDGFL2_S478	2.31477	-0.52581	8.64983	3.34623e-11	3.45163e-10	15.2471
ANK2_S3840	-1.92506	0.0267436	-8.80896	3.53053e-11	3.63064e-10	15.2403
FCHO2_S312	2.46135	-0.400667	9.20236	4.2531e-11	4.25689e-10	15.2339
DRP2_T910	-1.90007	0.274167	-8.98979	3.8329e-11	3.90024e-10	15.2335
ZNF830_S351	1.60103	-0.169048	8.64176	3.4374e-11	3.5435e-10	15.2204
RAB1B_S179	-1.64311	0.199095	-8.64135	3.44214e-11	3.54622e-10	15.219
TRIP11_S1842	1.58712	-0.290439	8.68284	3.60246e-11	3.69558e-10	15.2146
MYCBP2_S178	-1.50056	0.316917	-8.99049	3.82486e-11	3.89531e-10	15.213
CRTC2_S613	1.48788	-0.204952	8.63951	3.46329e-11	3.56584e-10	15.2129
MAP4_T96	2.705	-0.612912	9.12164	4.1665e-11	4.1876e-10	15.211
HSP90AA1_S575	-2.01291	0.370675	-8.73475	3.67655e-11	3.76016e-10	15.2092
BCL2L13_S395	2.4408	-0.500707	8.68097	3.62463e-11	3.71156e-10	15.2085
ATP6AP1_T319	-3.95525	0.956086	-9.04417	4.10688e-11	4.1425e-10	15.2074
MADD_S1270	-3.65327	0.421588	-9.11982	4.18843e-11	4.20714e-10	15.2058
KCNQ5_S404	-3.64112	0.448667	-9.19893	4.29458e-11	4.28822e-10	15.1996
DLG2_S470	-2.84604	0.226714	-8.63496	3.51628e-11	3.61818e-10	15.1978
SYN2_S66	-2.68186	0.564611	-8.97725	3.98023e-11	4.02679e-10	15.1959
HSPA14_S186	-1.78728	0.337925	-8.72912	3.74411e-11	3.82462e-10	15.1911
PKP4_S231	-2.0035	0.280568	-8.90736	3.94442e-11	3.99535e-10	15.1875
DMXL2_S473	-3.61117	0.612114	-9.04373	4.11216e-11	4.14534e-10	15.1816
EPB41L1_S378	-3.96202	0.580429	-8.62698	3.61109e-11	3.70219e-10	15.1713
ITPR1_S1752	-2.06445	0.246921	-8.83855	3.94706e-11	3.99563e-10	15.1701
EPB41L4B_S602	-2.00705	0.329476	-8.62619	3.6206e-11	3.70969e-10	15.1686
RIMS1_S1128	-3.52397	0.523389	-8.95901	4.20497e-11	4.22124e-10	15.1667
MAP1A_S2235	2.40177	-0.274561	8.67562	3.6889e-11	3.7705e-10	15.1649
PLP1_S194	-3.42951	0.372368	-8.83459	3.99619e-11	4.03809e-10	15.1578
CACNB1_T418	-2.03973	0.413684	-8.83389	4.00494e-11	4.04451e-10	15.1556
KPNA3_S60	1.49863	-0.166286	8.62203	3.67116e-11	3.75693e-10	15.1548
KBTBD11_S93	-2.77616	0.280595	-8.89437	4.10487e-11	4.1425e-10	15.1477
PPP1R12C_S399	-1.42682	0.351	-8.77817	3.89342e-11	3.9532e-10	15.1427
HSPA12A_S40	-1.67018	0.13122	-8.66876	3.77294e-11	3.84708e-10	15.1425
APC_T1386	-1.39448	0.177667	-8.61235	3.79168e-11	3.86385e-10	15.1226
EPB41L3_S9	-3.20489	0.256095	-8.60623	3.86985e-11	3.934e-10	15.1023
PARN_S619	1.59259	-0.270905	8.60539	3.8808e-11	3.94275e-10	15.0995
DST_S170	-1.33007	0.0826944	-8.9354	4.51511e-11	4.49247e-10	15.0959
DLG1_S158	-1.84018	0.316143	-8.60058	3.94361e-11	3.99535e-10	15.0835
YTHDF3_S388	1.21066	-0.177881	8.5969	3.99234e-11	4.03662e-10	15.0713
BSN_S2536	-1.72684	0.10565	-8.69101	4.23531e-11	4.24423e-10	15.0684
HMGN1_S8	1.65693	-0.183778	8.93369	4.53836e-11	4.51294e-10	15.0651
ANKS1B_S651	-3.47425	0.409056	-8.93067	4.57997e-11	4.54895e-10	15.0561
RTN3_S650	-3.22284	0.460667	-8.7508	4.24769e-11	4.254e-10	15.0559
CC2D1A_S674	-3.38167	0.487317	-8.64228	4.11601e-11	4.14669e-10	15.0558
GNAI2_S282	-1.98858	0.453881	-8.58758	4.11842e-11	4.14669e-10	15.0403
SERINC1_S361	-1.99725	0.301838	-8.85898	4.57628e-11	4.54796e-10	15.0395
CAD_S1859	1.681	-0.271214	8.58701	4.12627e-11	4.15213e-10	15.0384
TNS2_S941	1.94472	-0.370786	8.58618	4.13772e-11	4.16116e-10	15.0357
SRRM2_S1866	1.54432	-0.181615	8.74092	4.38338e-11	4.36913e-10	15.0246
NEFM_S620	-4.94923	0.384095	-8.58065	4.21488e-11	4.22867e-10	15.0173
PDE4A_S302	-1.64457	0.280026	-8.78863	4.61414e-11	4.5775e-10	15.0146
TBC1D4_T613	-2.66772	0.547088	-9.05319	5.07915e-11	4.99475e-10	15.0139
FAM160A2_S596	-1.36142	0.22631	-8.57919	4.23542e-11	4.24423e-10	15.0124
TLN2_T1843	-1.65643	0.213071	-8.57724	4.26319e-11	4.2642e-10	15.0059
IFT140_S360	-1.26558	0.134952	-8.57708	4.26547e-11	4.2642e-10	15.0054
AP3B2_S272	-2.30409	0.342643	-8.57642	4.27488e-11	4.27108e-10	15.0032
GRM5_S1018	-2.29124	0.400405	-8.57431	4.30504e-11	4.29612e-10	14.9962
CAPZA1_T63	-1.71442	0.446128	-8.72226	4.65194e-11	4.61228e-10	14.9904
ZC3H18_S892	1.31532	-0.159643	8.57183	4.34083e-11	4.32927e-10	14.9879
CRKL_S222	2.35429	-0.509	8.65662	4.73423e-11	4.68286e-10	14.9864
TBCEL_S18	-2.12048	0.437184	-8.77723	4.78171e-11	4.72429e-10	14.979
SPTAN1_S2147	-1.49264	0.145214	-8.56808	4.39561e-11	4.37873e-10	14.9754
PSD_S34	-2.63527	0.757722	-8.90252	4.98595e-11	4.91456e-10	14.9714
ATF7IP_S65	1.49523	-0.238952	8.56643	4.4199e-11	4.40033e-10	14.9699
SYNGAP1_S1118	-3.51641	0.838853	-9.04535	5.19589e-11	5.09469e-10	14.9673
TMEM94_S231	-1.74219	0.310179	-8.7115	4.81419e-11	4.75359e-10	14.9563
RIF1_S1616	1.97875	-0.420273	9.11078	5.51262e-11	5.38897e-10	14.9512
PALM_S369	-3.56033	0.539342	-8.76605	4.95226e-11	4.88421e-10	14.9441
MPP3_S332	-1.85611	0.582583	-8.89648	5.07766e-11	4.99475e-10	14.9303
PI4KA_S1828	-2.96063	0.296571	-8.55372	4.61163e-11	4.5775e-10	14.9276
PTPRD_S1302	-3.55416	0.516182	-9.10047	5.67644e-11	5.52413e-10	14.922
MGRN1_S460	-2.4176	0.512939	-9.09869	5.70521e-11	5.54893e-10	14.917
MAP1S_S646	-3.70668	0.602833	-8.54894	4.68588e-11	4.64321e-10	14.9117
NEFM_S783	-3.90843	0.37231	-8.54872	4.68941e-11	4.64397e-10	14.911
JAKMIP3_S384	-2.1564	0.341235	-9.02479	5.51519e-11	5.38897e-10	14.9079
PSME3_S24	2.73274	-0.276071	8.54729	4.71182e-11	4.66343e-10	14.9062
PCDHGC5_S746	-2.20343	0.456079	-8.75181	5.17821e-11	5.08031e-10	14.8997
CHRM2_S232	-1.80486	0.327757	-8.81125	5.30014e-11	5.19088e-10	14.8932
PKM_S141	-2.82638	0.331235	-9.0112	5.73701e-11	5.57663e-10	14.8928
MAP2_S140	-3.88561	0.604024	-8.54317	4.77726e-11	4.72266e-10	14.8925
COMMD3-BMI1_S398	-1.3556	0.240718	-8.69077	5.14315e-11	5.04885e-10	14.8905
CDK12_S301	1.47837	-0.183892	8.7961	5.55335e-11	5.42209e-10	14.8735
CWC22_S829	1.25013	-0.147643	8.53671	4.88144e-11	4.81717e-10	14.871
LPIN2_S106	2.09546	-0.452537	8.57676	5.10666e-11	5.01887e-10	14.8674
NPEPPS_S745	-4.15732	0.605882	-8.99759	5.96834e-11	5.76165e-10	14.8534
ATXN1L_S284	1.56173	-0.259444	8.86223	5.63132e-11	5.48655e-10	14.8502
HK1_Y767	-3.39854	0.667118	-9.00433	5.85266e-11	5.6727e-10	14.8487
CADM1_S463	-1.37792	0.211238	-8.52956	4.99956e-11	4.92509e-10	14.8472
JCAD_S885	-1.8929	0.254167	-8.52525	5.07215e-11	4.99369e-10	14.8328
BCL11A_S205	-1.59528	0.517205	-8.67221	5.45684e-11	5.33814e-10	14.8315
CSDE1_S560	-1.57073	0.441543	-8.92357	5.86748e-11	5.68054e-10	14.8273
FETUB_S315	2.15471	-0.187905	8.52231	5.12238e-11	5.03139e-10	14.823
PALM2_T393	-2.54863	0.510286	-8.92025	5.92561e-11	5.72695e-10	14.8175
MAP4_S865	2.16881	-0.579158	8.72321	5.66427e-11	5.51547e-10	14.8104
MCRS1_S35	1.3835	-0.208029	8.98617	6.1697e-11	5.92889e-10	14.7961
SNX11_S192	-1.41439	0.350357	-8.51383	5.26982e-11	5.16417e-10	14.7948
DENND4C_S1662	1.69218	-0.429769	8.6666	5.55551e-11	5.42209e-10	14.7883
SRPK2_S542	1.49578	-0.1935	8.71564	5.80051e-11	5.63187e-10	14.7867
GAPDH_S333	-2.9243	0.533108	-8.77527	5.92166e-11	5.72642e-10	14.7827
NEFH_S57	-2.41895	0.210833	-8.83119	6.18593e-11	5.9411e-10	14.7827
ADD3_S590	-2.44713	0.268485	-9.05465	6.46592e-11	6.17834e-10	14.7691
ZC3H4_S807	1.41441	-0.148452	8.50611	5.40762e-11	5.29306e-10	14.7691
ZNF609_S417	1.96497	-0.352438	9.12088	6.91944e-11	6.56784e-10	14.7444
KCNF1_T475	-2.67846	0.454048	-8.49768	5.56246e-11	5.42573e-10	14.7409
SPEN_S1261	1.58678	-0.193513	8.65032	5.85195e-11	5.6727e-10	14.7365
RAPGEF1_S299	-1.00211	0.0894048	-8.49417	5.62811e-11	5.48655e-10	14.7292
PAFAH1B2_S64	-3.66279	0.430455	-9.02966	6.94275e-11	6.58546e-10	14.7216
EIF4B_S450	1.82205	-0.311972	8.8172	6.45356e-11	6.17003e-10	14.7144
MARK3_S369	-1.72253	0.428725	-8.57907	6.08863e-11	5.87442e-10	14.7071
PTGR1_S20	-1.8879	0.249353	-8.94676	6.9192e-11	6.56784e-10	14.7063
ATP8A2_S475	-1.28307	0.294095	-8.4858	5.78824e-11	5.62319e-10	14.7013
AKAP12_S697	-1.61986	0.293143	-8.48395	5.82416e-11	5.65158e-10	14.6951
KCTD16_S284	-5.26257	1.07745	-9.02772	6.98119e-11	6.61303e-10	14.6926
PCYT1A_S323	2.30313	-0.371512	8.52269	6.10322e-11	5.88513e-10	14.69
KCNQ2_S466	-3.092	0.512238	-8.4823	5.85641e-11	5.67308e-10	14.6896
SF3B1_T142	1.68607	-0.245786	8.48094	5.88317e-11	5.69246e-10	14.6851
KLHL42_S171	-1.28415	0.36969	-8.47857	5.92996e-11	5.72787e-10	14.6772
LURAP1_S213	-2.0684	0.479256	-8.62635	6.31773e-11	6.05091e-10	14.6602
USP11_S733	-2.12121	0.419667	-8.46968	6.10925e-11	5.88722e-10	14.6475
SPTB_S2114	-1.83542	0.252214	-8.46953	6.11237e-11	5.88722e-10	14.647
DDX23_S107	1.66548	-0.155091	9.00177	7.51713e-11	7.06275e-10	14.6425
SYT4_S135	-3.03512	0.450025	-8.55883	6.50269e-11	6.20644e-10	14.6416
HNRNPUL2_S188	1.62767	-0.226	8.66893	6.71742e-11	6.40415e-10	14.6405
SCG2_S556	-3.04377	0.229357	-8.46698	6.16482e-11	5.92889e-10	14.6385
EHBP1_S1035	1.89182	-0.252238	8.46679	6.16875e-11	5.92889e-10	14.6379
CENPA_S17	3.00865	-0.356619	8.46676	6.16937e-11	5.92889e-10	14.6378
CACNA1B_S745	-1.8496	0.394524	-8.46513	6.20309e-11	5.95419e-10	14.6324
ARHGAP15_S243	2.89739	-0.451707	8.50456	6.47968e-11	6.18799e-10	14.6305
TCP11L1_S16	-1.87737	0.315476	-8.46139	6.28145e-11	6.02598e-10	14.6199
PLCL1_T556	-3.05791	0.44569	-8.46042	6.30188e-11	6.04214e-10	14.6166
PGM1_S135	-1.41429	0.0482143	-8.45965	6.3182e-11	6.05091e-10	14.6141
ENO1_S27	-1.72605	0.157595	-8.45925	6.32667e-11	6.05557e-10	14.6127
ATRX_S704	1.44205	-0.261738	8.45888	6.33451e-11	6.05964e-10	14.6115
CEP170B_S969	-1.76145	0.357914	-8.8443	7.42535e-11	6.9921e-10	14.5926
MLIP_S509	-2.0168	0.2335	-8.77506	7.33308e-11	6.91293e-10	14.5871
ANK2_S2795	-4.41859	0.195694	-8.77198	7.40194e-11	6.97395e-10	14.5778
TTC14_S630	1.8028	-0.393737	8.64854	7.1622e-11	6.76318e-10	14.5767
NUCKS1_S73	-3.14262	0.972821	-8.59787	6.92028e-11	6.56784e-10	14.5694
FMN2_S751	-2.18451	0.269781	-9.05303	8.36001e-11	7.7939e-10	14.5562
ST5_T364	2.51454	-0.638976	8.48194	6.98238e-11	6.61303e-10	14.5561
TNRC6B_S1336	-1.40507	0.474905	-8.44207	6.7017e-11	6.39277e-10	14.5554
TCP11L1_S55	-1.88229	0.389833	-8.44036	6.74014e-11	6.419e-10	14.5497
WDTC1_S511	-1.23723	0.274667	-8.44034	6.74062e-11	6.419e-10	14.5496
TSC2_S999	-1.23878	0.241538	-8.59049	7.08578e-11	6.70228e-10	14.5458
VDAC1_S215	-2.08597	0.248054	-8.69614	7.56081e-11	7.09984e-10	14.5393
PRICKLE2_S319	-1.4978	0.308381	-8.43718	6.81233e-11	6.48363e-10	14.5391
DACT3_S271	-1.8782	0.310381	-8.43568	6.84684e-11	6.5128e-10	14.534
SLC4A3_S170	-2.06263	0.209143	-8.43534	6.85468e-11	6.51659e-10	14.5329
DACT3_S129	-1.62805	0.231447	-8.63075	7.57475e-11	7.10245e-10	14.5209
PGK1_S203	-2.0793	0.296262	-8.42965	6.98658e-11	6.61303e-10	14.5139
GLUL_S343	-2.32336	0.3475	-8.42961	6.9875e-11	6.61303e-10	14.5138
MAP2_S629	-2.11489	0.635463	-8.47501	7.14421e-11	6.74998e-10	14.5064
CHRM1_T230	-2.31169	0.323676	-8.87644	8.49358e-11	7.90531e-10	14.5023
PPP1R14A_S128	-2.74671	0.440095	-8.42485	7.09996e-11	6.71193e-10	14.4979
TMX4_S251	-2.60142	0.496357	-8.42042	7.20645e-11	6.80116e-10	14.4831
AKAP12_S1395	-2.08995	0.291452	-8.41808	7.26323e-11	6.85092e-10	14.4752
CCDC86_S217	2.56031	-0.505512	8.45725	7.57622e-11	7.10245e-10	14.4749
FN3K_S298	-2.13378	0.295697	-8.93805	9.01737e-11	8.31481e-10	14.4614
SYT7_T58	-2.63346	0.387171	-8.46008	7.50554e-11	7.05579e-10	14.4572
MAP7D1_S241	-2.47025	0.602675	-8.50143	7.83787e-11	7.33957e-10	14.4558
MYADM_S22	-1.85182	0.364	-8.41128	7.43077e-11	6.9933e-10	14.4525
UBR4_S178	-2.02504	0.477452	-8.4105	7.45039e-11	7.00785e-10	14.4499
GAPDH_T154	-1.83867	0.0816667	-8.40581	7.56845e-11	7.10245e-10	14.4342
MED15_S505	1.48636	-0.155184	8.60056	8.3306e-11	7.77077e-10	14.4262
PRKCG_T655	-5.58123	1.04719	-8.40299	7.64054e-11	7.15876e-10	14.4248
MDC1_T1425	-1.93232	0.156229	-8.78613	8.83021e-11	8.16903e-10	14.42
PIK3CD_S520	-1.89506	0.385154	-8.54923	8.08686e-11	7.56014e-10	14.4141
SNPH_S278	-2.46079	0.544806	-8.71536	8.79091e-11	8.14161e-10	14.4064
LRFN4_S565	-1.8946	0.376263	-8.5935	8.51809e-11	7.92375e-10	14.404
OXSR1_S324	2.98329	-0.496229	8.76836	9.311e-11	8.56216e-10	14.3931
RIMS1_S728	-3.98008	0.550579	-8.58937	8.62964e-11	8.00104e-10	14.3911
MAP3K1_S250	2.90388	-0.0366061	8.88059	1.06301e-10	9.68017e-10	14.3793
DMXL2_S588	-2.99705	0.278838	-8.64214	8.93669e-11	8.25396e-10	14.3728
TMEM230_T88	1.66879	-0.380143	8.38719	8.05679e-11	7.54038e-10	14.372
MAP7D1_S116	-1.80275	0.429175	-8.47523	8.53623e-11	7.93624e-10	14.3708
CAMK2A_T261	-3.04539	0.488868	-8.58284	8.80936e-11	8.15421e-10	14.3706
DCLK1_S77	-1.62039	0.352167	-8.38628	8.08127e-11	7.5591e-10	14.369
NEFH_S566	-3.68265	0.246048	-8.3854	8.10544e-11	7.57331e-10	14.366
PLEC_S919	-2.79014	0.338424	-8.90245	9.98461e-11	9.12191e-10	14.36
PEX16_S183	-2.05931	0.2963	-8.47119	8.64942e-11	8.01497e-10	14.3577
MAP1B_T341	-1.76888	0.333081	-8.63636	9.09816e-11	8.38473e-10	14.355
TSC22D4_S62	1.42374	-0.274571	8.37821	8.30332e-11	7.75391e-10	14.342
WIPF2_S235	1.58265	-0.387048	8.37754	8.32221e-11	7.76725e-10	14.3397
SIK3_S592	-2.63091	0.444611	-8.68954	9.50938e-11	8.72081e-10	14.3281
ENC1_S406	-2.4124	0.597429	-8.37266	8.45967e-11	7.88245e-10	14.3234
TTC9_S15	-1.49607	0.207405	-8.37193	8.48048e-11	7.89747e-10	14.3209
ADD1_S12	-2.33916	0.0623095	-8.36902	8.56376e-11	7.95746e-10	14.3112
MAP1B_S1208	-2.1211	0.34231	-8.36876	8.5714e-11	7.96017e-10	14.3103
HDGFL3_S179	-1.93151	0.4205	-8.36741	8.6102e-11	7.98797e-10	14.3058
INTS13_S626	1.32344	-0.164262	8.36739	8.61081e-11	7.98797e-10	14.3057
CLASP2_S247	1.90095	-0.493463	8.40515	9.00188e-11	8.30507e-10	14.3033
GRM5_S992	-3.3784	0.437976	-8.40745	8.93356e-11	8.25396e-10	14.2837
TBC1D15_S70	1.84683	-0.463143	8.35968	8.83684e-11	8.17069e-10	14.2799
GSS_S181	-2.20538	0.187188	-8.94976	1.11614e-10	1.01148e-09	14.2685
KIF21A_S1212	-3.21249	0.217452	-8.3557	8.95584e-11	8.26712e-10	14.2666
AJM1_S434	-1.79606	0.412275	-8.44745	9.34559e-11	8.58461e-10	14.2541
TOP2B_S1550	1.75232	-0.174286	8.35025	9.12127e-11	8.40119e-10	14.2484
ARHGEF12_S309	-1.40248	0.074381	-8.3501	9.12599e-11	8.40119e-10	14.2479
ELFN2_S758	-2.70697	0.539024	-8.3944	9.32818e-11	8.57328e-10	14.2407
STXBP5_T1039	-3.37342	0.534375	-8.93836	1.15242e-10	1.03878e-09	14.2367
ACLY_S509	2.3786	-0.561548	8.34626	9.24444e-11	8.50559e-10	14.235
WWTR1_S62	3.99402	-0.572171	8.70292	1.13221e-10	1.02495e-09	14.2277
NCBP1_S7	1.97868	-0.246881	8.33999	9.44159e-11	8.66807e-10	14.214
DLGAP1_S169	-3.33459	0.653524	-8.33957	9.45494e-11	8.6756e-10	14.2126
ADD2_T552	-3.2188	0.4445	-8.33608	9.56642e-11	8.76835e-10	14.2009
IQSEC3_S358	-2.16613	0.183929	-8.3335	9.64983e-11	8.84e-10	14.1923
USP9X_S2563	-1.23452	0.218706	-8.77654	1.13773e-10	1.02884e-09	14.1861
ENO1_S272	-2.10671	0.149286	-8.331	9.73121e-11	8.90971e-10	14.1839
RAPGEF1_S481	2.97557	-0.4724	8.69627	1.15497e-10	1.04052e-09	14.1787
PFKL_S427	-1.63488	0.253053	-8.51979	1.07496e-10	9.77956e-10	14.1723
CCDC92_S211	-1.27091	0.195762	-8.32641	9.88284e-11	9.04363e-10	14.1685
CBL_Y455	1.52667	-0.41781	8.32601	9.89609e-11	9.05085e-10	14.1672
CAST_S11	2.29674	-0.453976	8.32407	9.96089e-11	9.10517e-10	14.1607
EPB41L1_S544	-1.7973	0.286579	-8.51421	1.09411e-10	9.92583e-10	14.1548
MPRIP_S891	-1.52537	0.362381	-8.31996	1.00996e-10	9.22197e-10	14.1469
MAPK8IP3_S755	-4.09594	0.544515	-8.83589	1.20851e-10	1.08585e-09	14.1455
CEP350_S1648	1.37021	-0.154324	8.75371	1.21655e-10	1.09133e-09	14.1448
NEFL_S472	-5.05065	0.62819	-8.31638	1.02219e-10	9.32862e-10	14.135
CHAMP1_S405	1.85623	-0.23331	8.31526	1.02604e-10	9.35868e-10	14.1312
BAP1_S521	1.28509	-0.120026	8.45921	1.0796e-10	9.81004e-10	14.1261
FAM171A1_S371	-2.46274	0.169294	-8.7466	1.24218e-10	1.11314e-09	14.1241
KIF1A_S1013	-1.81873	0.344194	-8.613	1.20086e-10	1.07956e-09	14.1229
SRRM1_S789	-2.15354	0.567711	-8.50318	1.13295e-10	1.02506e-09	14.12
CPNE6_S385	-2.65291	0.41955	-8.40454	1.07508e-10	9.77956e-10	14.1145
TTBK2_S1150	-1.99621	0.316139	-8.61845	1.18103e-10	1.06287e-09	14.1123
SETD1A_T916	1.49107	-0.336333	8.30668	1.0561e-10	9.62768e-10	14.1025
SYN1_S177	-3.60174	0.663286	-8.30626	1.05761e-10	9.63619e-10	14.101
RPAP1_S603	-2.18961	0.522029	-8.6658	1.2653e-10	1.13146e-09	14.088
SRRM2_S1103	-1.48917	0.399048	-8.30059	1.07797e-10	9.80053e-10	14.082
PELP1_S1093	1.6932	-0.352738	8.29902	1.0837e-10	9.84199e-10	14.0768
TBC1D10B_S132	-1.48285	0.198079	-8.48805	1.18847e-10	1.06899e-09	14.0724
TP53BP1_S299	1.30156	-0.118571	8.29635	1.09349e-10	9.92558e-10	14.0678
BCLAF1_S119	1.9346	-0.0896341	8.33261	1.14491e-10	1.03367e-09	14.0641
SNPH_T63	-3.59307	0.224769	-8.43964	1.14971e-10	1.03689e-09	14.0634
SRRM2_S1984	1.38372	-0.136238	8.29109	1.11304e-10	1.00922e-09	14.0502
TBC1D9B_S432	-1.26595	0.231548	-8.28677	1.12932e-10	1.02287e-09	14.0357
SYN2_Y139	-3.73239	0.588405	-8.28414	1.13937e-10	1.02977e-09	14.0269
CSRP1_T16	-2.06634	0.339667	-8.28349	1.14189e-10	1.0315e-09	14.0247
SORBS2_S1118	-1.79147	0.309053	-8.47188	1.25089e-10	1.11976e-09	14.0214
CTPS1_S575	-1.1957	0.266857	-8.28214	1.14707e-10	1.03506e-09	14.0202
PLCH2_S487	-3.22959	0.56769	-8.27926	1.15826e-10	1.04293e-09	14.0105
MAP7D1_T47	-1.90028	0.339406	-8.85049	1.4754e-10	1.30686e-09	13.9907
ZC3HC1_S395	1.06424	-0.0878095	8.26564	1.21263e-10	1.08898e-09	13.9648
DLG1_S709	1.58912	-0.341738	8.26522	1.21436e-10	1.08995e-09	13.9634
SPTBN4_S1454	-2.50207	0.223583	-8.56025	1.41091e-10	1.25369e-09	13.9626
CCDC85A_S313	-2.95003	0.580526	-8.45082	1.33715e-10	1.19128e-09	13.955
PLEC_S757	-2.10359	0.316071	-8.26037	1.23437e-10	1.10674e-09	13.9471
BRSK1_S586	-1.89626	0.301147	-8.68465	1.49029e-10	1.31797e-09	13.9429
PGAM1_Y26	-2.24991	0.170214	-8.25692	1.24882e-10	1.1185e-09	13.9356
PTPRN_S303	-4.02623	0.4738	-8.62329	1.43737e-10	1.27518e-09	13.9344
SRGAP3_T739	-3.20565	0.438875	-8.82717	1.57565e-10	1.38692e-09	13.9253
REPS1_S166	-1.57666	0.401061	-8.75833	1.51065e-10	1.33388e-09	13.923
HECTD4_S1395	-1.22172	0.242524	-8.25317	1.26468e-10	1.13146e-09	13.923
PACSIN1_T374	-3.45165	0.477366	-8.29632	1.29153e-10	1.15247e-09	13.9166
CAD_S1406	2.04034	-0.550429	8.24945	1.28064e-10	1.14456e-09	13.9105
LIMK2_S272	1.61244	-0.30019	8.24851	1.28473e-10	1.14762e-09	13.9073
WDFY1_S408	-3.85204	0.879344	-8.83614	1.53631e-10	1.35512e-09	13.9058
CBR1_S151	-1.96264	0.209929	-8.24706	1.29101e-10	1.15247e-09	13.9025
REPS1_S143	1.5522	-0.30119	8.24664	1.29283e-10	1.15302e-09	13.9011
SRI_S111	-1.54122	0.181	-8.43274	1.41602e-10	1.25757e-09	13.898
CDC42EP1_S121	2.70318	-0.435738	8.24269	1.31017e-10	1.16787e-09	13.8878
DLG2_S433	-2.43553	0.453342	-8.42519	1.45033e-10	1.286e-09	13.8741
MAP7D3_S229	2.92344	-0.657366	8.27216	1.39951e-10	1.24421e-09	13.8643
ST13_S79	-1.76787	0.364071	-8.23389	1.34965e-10	1.20179e-09	13.8583
NEFM_S736	-3.41633	0.449071	-8.23248	1.35605e-10	1.20685e-09	13.8535
CALM2_S150	-1.82931	0.501238	-8.22988	1.368e-10	1.21684e-09	13.8448
PCDH1_S1173	-2.54354	0.418424	-8.72233	1.67597e-10	1.46909e-09	13.8445
GOLIM4_S583	3.30586	-0.430525	8.3031	1.49821e-10	1.32359e-09	13.8416
DIXDC1_S592	-2.48765	0.348606	-8.72118	1.6815e-10	1.47241e-09	13.8412
FLCN_S73	-1.28255	0.297083	-8.52527	1.57035e-10	1.38298e-09	13.8284
MAP1B_S1312	-2.58714	0.262357	-8.21634	1.43192e-10	1.27102e-09	13.7993
SRRM1_S677	2.47324	-0.342382	8.62228	1.79102e-10	1.55538e-09	13.7891
SYN1_T241	-2.64895	0.541175	-8.30423	1.49265e-10	1.31937e-09	13.7876
MAPRE2_S200	-2.62607	0.532548	-8.21037	1.46109e-10	1.29486e-09	13.7793
CFL1_S156	-1.77612	0.25481	-8.20718	1.47691e-10	1.30751e-09	13.7685
MAP1A_S1600	-3.43916	0.64469	-8.20483	1.48863e-10	1.3172e-09	13.7607
KIAA1217_S1120	-2.26877	0.602559	-8.62926	1.75451e-10	1.52682e-09	13.7544
AKAP12_S749	-2.85118	0.581917	-8.49886	1.70276e-10	1.48793e-09	13.7478
RANBP3_T128	-1.28352	0.215857	-8.20009	1.51268e-10	1.33497e-09	13.7447
NCKAP5L_S630	1.84174	-0.236368	8.37903	1.67915e-10	1.47111e-09	13.7283
TPPP_S133	-4.00135	0.7534	-8.28205	1.60522e-10	1.40927e-09	13.7151
TRIM2_S467	-1.74668	0.251833	-8.19111	1.55922e-10	1.37461e-09	13.7145
C16orf70_S373	-1.95447	0.230452	-8.19067	1.56154e-10	1.37593e-09	13.7131
KCTD16_S137	-2.39766	0.453788	-8.67331	1.93095e-10	1.66917e-09	13.7036
OSBP2_S287	-1.74575	0.438119	-8.18616	1.58548e-10	1.39484e-09	13.6979
SETX_S1366	1.57344	-0.332833	8.18593	1.58672e-10	1.3952e-09	13.6971
EIF4B_S16	3.07514	-0.785118	8.59974	1.91422e-10	1.65715e-09	13.6938
RIN1_S337	-1.89171	0.163548	-8.18411	1.5965e-10	1.40308e-09	13.691
TEX2_S801	-2.19217	0.4875	-8.75167	1.95028e-10	1.68071e-09	13.6887
SLC4A7_S251	2.12206	-0.304	8.18303	1.60235e-10	1.40748e-09	13.6874
PTPRU_S863	-1.89133	0.387619	-8.17914	1.62353e-10	1.4246e-09	13.6743
IQSEC2_S82	-5.39979	0.934784	-8.42422	1.76042e-10	1.53118e-09	13.6722
PKM_S436	-2.21112	0.281909	-8.66243	1.99272e-10	1.7164e-09	13.6722
KIAA1549_S1503	-1.93781	0.287122	-8.21982	1.66574e-10	1.46088e-09	13.6632
KIF16B_S1017	3.50696	-0.652951	8.20985	1.72198e-10	1.50394e-09	13.6581
YWHAE_S233	-1.3637	0.281206	-8.58509	1.99888e-10	1.72004e-09	13.6507
RIMS2_S1161	-2.62762	0.280256	-8.29896	1.8095e-10	1.57062e-09	13.6382
GRIN2B_S1259	-3.18891	0.433103	-8.30725	1.76167e-10	1.53147e-09	13.6381
RSF1_T1305	2.01476	-0.399976	8.16783	1.68677e-10	1.47625e-09	13.6363
SSH3_S484	-1.33966	0.153857	-8.16746	1.68887e-10	1.47732e-09	13.635
MAP1B_S1438	-1.96383	0.328548	-8.16683	1.69242e-10	1.47966e-09	13.6329
GRM5_S1020	-2.59886	0.391395	-8.34336	1.88069e-10	1.63073e-09	13.6154
RFC1_S108	1.4346	-0.207929	8.16077	1.72748e-10	1.5076e-09	13.6125
DYNC1I2_S101	-1.83384	0.357238	-8.16068	1.72796e-10	1.5076e-09	13.6122
ELMSAN1_S461	1.26897	-0.135184	8.34197	1.88901e-10	1.63627e-09	13.611
DAGLA_S1030	-2.46808	0.408905	-8.15963	1.73413e-10	1.5122e-09	13.6087
ARFGEF3_S1061	-2.63043	0.364452	-8.15881	1.73892e-10	1.51482e-09	13.606
PDE4B_S290	-1.28887	0.244095	-8.15881	1.73892e-10	1.51482e-09	13.606
ASAP2_S701	-1.18895	0.260381	-8.15837	1.74151e-10	1.51629e-09	13.6045
FRY_S1940	-1.42183	0.100738	-8.15156	1.78207e-10	1.54841e-09	13.5815
SOX13_S335	2.1514	-0.570526	8.33193	1.95028e-10	1.68071e-09	13.5792
HSP90AA1_S385	-1.15415	0.2065	-8.14555	1.81865e-10	1.57775e-09	13.5613
TLN2_S2172	-3.36144	0.636618	-8.5488	2.2253e-10	1.89736e-09	13.5439
PCYT1B_S346	-1.2503	0.197952	-8.13473	1.88642e-10	1.63486e-09	13.5249
PPP1R11_T109	-1.35342	0.234595	-8.13027	1.91508e-10	1.65715e-09	13.5099
ZDHHC5_S274	-2.14089	0.452714	-8.47256	2.26268e-10	1.92728e-09	13.5097
GORASP2_T222	1.68643	-0.265756	8.16509	1.99898e-10	1.72004e-09	13.5097
SLC4A2_S144	1.10212	-0.129381	8.12874	1.925e-10	1.66488e-09	13.5047
TBC1D10B_S704	-2.00679	0.366571	-8.12721	1.93497e-10	1.67131e-09	13.4996
SEC61B_S17	2.59935	-0.336429	8.12714	1.93541e-10	1.67131e-09	13.4994
PALLD_S897	2.72039	-0.421548	8.12623	1.94138e-10	1.67561e-09	13.4963
LIMA1_S687	1.53992	-0.238286	8.12532	1.9474e-10	1.67995e-09	13.4932
SHANK2_S1713	-3.25667	0.462156	-8.6734	2.43475e-10	2.05928e-09	13.4921
MAP7D1_T21	-1.2408	0.286306	-8.41316	2.21537e-10	1.88984e-09	13.4856
CNOT2_S165	2.08016	-0.304351	8.35381	2.19399e-10	1.87445e-09	13.4783
MAP4_T70	2.23207	-0.222625	8.66432	2.49831e-10	2.1046e-09	13.4664
CTNND2_S43	-2.00788	0.122714	-8.11423	2.02182e-10	1.73881e-09	13.4559
SRRM2_S1517	-2.42574	0.742952	-8.11312	2.02941e-10	1.74445e-09	13.4522
MARCKS_S134	-1.81886	0.234119	-8.11113	2.0431e-10	1.75485e-09	13.4455
PNPO_S241	-1.32975	0.20731	-8.11106	2.04359e-10	1.75485e-09	13.4452
FRY_S2451	-1.69289	0.248429	-8.45893	2.35778e-10	1.99919e-09	13.4413
LIMCH1_S1103	2.19329	-0.494476	8.10888	2.05875e-10	1.76696e-09	13.4379
CASKIN1_S935	-1.92344	0.0675	-8.18756	2.18909e-10	1.87121e-09	13.4337
LSM14A_S182	2.89477	-0.53441	8.21336	2.3869e-10	2.02287e-09	13.4274
IQSEC1_S926	-1.42968	0.146684	-8.28378	2.27331e-10	1.93437e-09	13.4266
NES_S1560	2.40773	-0.362073	8.13883	2.18194e-10	1.86605e-09	13.4226
BCR_S382	-2.66653	0.466974	-8.28123	2.29185e-10	1.94917e-09	13.4186
MAP3K1_S275	-2.27403	0.27641	-8.23854	2.19997e-10	1.87861e-09	13.4168
RPP30_S251	1.71339	-0.146611	8.38767	2.39608e-10	2.02963e-09	13.4075
EIF5B_S1168	-1.42145	0.292553	-8.27733	2.32055e-10	1.9706e-09	13.4062
PKM_S111	-1.33912	0.212833	-8.0989	2.12942e-10	1.82669e-09	13.4043
SERINC1_S364	-1.57517	0.27181	-8.09862	2.13144e-10	1.82749e-09	13.4033
REM2_S27	-2.86209	0.645303	-8.56828	2.61822e-10	2.19987e-09	13.4005
BOD1L1_S2475	1.73365	-0.180405	8.09604	2.15019e-10	1.84263e-09	13.3946
PHACTR4_S474	1.71385	-0.243738	8.09422	2.16343e-10	1.85303e-09	13.3885
RAP1GAP_S600	-3.19966	0.467762	-8.09336	2.16978e-10	1.85753e-09	13.3856
PPP1R18_S224	1.75693	-0.081	8.09311	2.17161e-10	1.85816e-09	13.3848
CCNL2_S348	1.24548	-0.0300513	8.22858	2.27205e-10	1.93428e-09	13.3846
NCOA5_S29	1.71886	-0.181024	8.08881	2.20342e-10	1.8806e-09	13.3703
OSBPL11_S15	2.45352	-0.151946	8.30679	2.54226e-10	2.14055e-09	13.3608
STXBP5L_S758	-4.17834	0.586	-8.22046	2.33259e-10	1.97883e-09	13.3584
PRUNE2_S597	-1.92149	0.374158	-8.26126	2.44247e-10	2.06478e-09	13.3552
ADD1_S427	-1.80874	0.0989211	-8.25992	2.45294e-10	2.06984e-09	13.3509
OGFR_S315	-1.44507	0.39681	-8.08176	2.25663e-10	1.9231e-09	13.3465
BNIP3L_S120	-1.61552	0.174842	-8.25665	2.47862e-10	2.08905e-09	13.3406
GRM1_S969	-1.75696	0.467049	-8.11946	2.32768e-10	1.97566e-09	13.33
PDZD4_S496	-1.50392	0.279905	-8.07646	2.29749e-10	1.95298e-09	13.3287
IQSEC2_S412	-2.43012	0.259286	-8.07468	2.31142e-10	1.96383e-09	13.3226
JCAD_S1123	-1.61271	0.219184	-8.24016	2.61248e-10	2.19639e-09	13.2882
[truncated: 8,454 more rows]

## Sheet: OPC DEPPs
Phosphoprotein	logFC	AveExpr	t	P.Value	adj.P.Val	B
NES_S358	5.06578	-3.44957	11.5967	1.04e-09	3.8e-08	12.5596
MAP2_S315	5.0386	-2.29458	11.7038	3.56e-09	9.81e-08	11.4394
MAP1B_T1633	4.63742	-2.32	10.4964	4.91e-09	1.27e-07	10.9975
TNKS1BP1_S851	4.371	-2.90175	12.3572	1.64e-09	5.49e-08	12.2115
TEX2_S295	4.28485	-2.11523	14.2752	8.48e-11	6.24e-09	15.0918
SPECC1_S315	4.25637	-2.69908	11.8142	3.12e-09	8.86e-08	11.5726
AQP4_S340	4.22593	-1.40977	11.9692	1.26e-09	4.43e-08	12.4203
EVL_S287	3.84963	-1.5647	9.18761	3.07e-07	3.78e-06	7.15724
MAP1B_T1879	3.8292	-0.8185	5.69032	3.57e-05	0.000218228	2.10007
MAP1A_T1835	3.78302	-1.24162	8.29509	2.49e-07	3.17e-06	7.08586
TNKS1BP1_S228	3.7802	-1.4081	8.09805	1.35e-06	1.33e-05	5.60299
LARP1_S979	3.76689	-1.74575	10.3681	1.95e-08	3.85e-07	9.73503
GBF1_S233	3.75393	-2.67064	10.2519	7.05e-09	1.68e-07	10.6326
SPAG9_T217	3.70393	-2.2985	13.365	1.07e-10	7.34e-09	14.8229
IWS1_S720	3.69411	-2.0515	14.4645	1.66e-10	9.98e-09	14.463
P2RY1_S354	3.68942	-2.31262	7.34915	1.25e-06	1.24e-05	5.44543
HSPB1_S82	3.65511	-2.10371	9.93306	1.14e-08	2.48e-07	10.1465
RPS28_S23	3.57397	-2.36177	7.90045	4.81e-07	5.51e-06	6.4162
AKT1S1_S203	3.55173	-1.64191	10.085	5.26e-08	8.57e-07	8.80522
MAP1A_S2235	3.50331	-0.897929	8.86438	6.22e-08	9.84e-07	8.42849
XRN2_S526	3.46811	-2.4455	9.21809	3.5e-08	6.2e-07	9.01275
YAP1_S164	3.46767	-2.76721	10.103	8.81e-09	2e-07	10.4071
PLEK_S113	3.45046	-1.81217	8.2387	4.26e-07	4.96e-06	6.61225
CLIP2_S18	3.43249	-2.183	6.78035	2.57e-06	2.28e-05	4.64952
FMN2_T269	3.42751	-1.20258	8.72057	2.02e-07	2.67e-06	7.36706
KIF16B_S1017	3.42082	-2.15992	5.37039	5.36e-05	0.000308882	1.62152
ALB_S82	3.39624	-1.0255	7.82294	3.72e-07	4.44e-06	6.61362
LUC7L3_T238	3.38329	-2.52957	12.5455	2.97e-10	1.54e-08	13.8094
EIF4B_S422	3.36907	-1.63127	8.73009	3.31e-07	4.02e-06	6.94576
CTNND1_T916	3.359	-2.0651	8.35279	9.44e-07	9.8e-06	5.96705
CDC42EP1_S121	3.35347	-1.362	9.14224	3.95e-08	6.8e-07	8.88878
TJP2_S194	3.353	-1.25592	9.14277	1.08e-07	1.57e-06	8.00435
EEA1_S15	3.3444	-1.91169	7.78374	5.87e-07	6.53e-06	6.21414
MAP2_S233	3.30133	-1.8938	5.71289	5.77e-05	0.00032894	1.78512
PALLD_S894	3.28569	-2.18443	7.39061	8.14e-07	8.6e-06	5.81727
PML_S480	3.27342	-1.67914	7.59596	5.59e-07	6.26e-06	6.19872
EIF4B_S16	3.25814	-1.86958	8.43456	3.14e-07	3.84e-06	6.92264
SOGA3_S41	3.24368	-1.79231	5.67444	2.91e-05	0.000183908	2.2419
CANX_S637	3.24309	-2.46764	11.5441	1.11e-09	4.01e-08	12.4878
EML3_S157	3.24289	-2.12208	12.2919	1.77e-09	5.87e-08	12.1361
MAP2_S311	3.23312	-1.27362	6.56505	5.2e-06	4.2e-05	3.99267
SRRM2_T1531	3.2317	-2.10555	6.98469	4.84e-06	3.95e-05	4.21371
HEPACAM_S368	3.21973	-1.10343	4.78545	0.000153851	0.000773399	0.503174
WWTR1_S62	3.1815	-2.6089	5.50297	8.33e-05	0.000454913	1.4103
RAPGEF1_S481	3.17906	-1.52825	8.65353	2.24e-07	2.9e-06	7.26382
MYO1F_S939	3.1764	-1.643	3.66039	0.00264628	0.00869781	-2.10701
CENPA_S17	3.16956	-1.58857	5.37665	4.35e-05	0.000258573	1.77763
AHNAK2_S332	3.16131	-0.8145	5.84723	2.65e-05	0.000169929	2.4034
PPP1R2_S87	3.1392	-1.0182	8.93187	4.3e-07	5e-06	6.76476
SERPINC1_S68	3.12962	-1.09992	6.73594	3.78e-06	3.2e-05	4.31652
ACTN1_S172	3.1175	-1.656	5.5895	7.16e-05	0.000397693	1.70684
CDC42EP4_S174	3.11249	-1.47942	8.73169	1.99e-07	2.63e-06	7.38412
ACIN1_S825	3.09724	-2.03429	15.008	1.61e-11	2.13e-09	16.6913
SUPT16H_S1023	3.08725	-2.09985	9.71961	2.71e-08	5.03e-07	9.33667
HTT_S642	3.07829	-1.9195	9.10952	4.17e-08	7.1e-07	8.83508
PALLD_S897	3.0754	-1.46064	6.30042	6.56e-06	5.11e-05	3.69563
GAB1_S208	3.06988	-1.22015	5.76515	2.43e-05	0.000157893	2.42486
PLEK_S117	3.06327	-1.61927	7.25094	3.13e-06	2.72e-05	4.65694
CLASP1_S1223	3.03951	-1.84125	6.51145	7.78e-06	5.91e-05	3.65125
SYN3_S447	3.03087	-0.638833	6.03128	1.87e-05	0.000127403	2.7889
LARP1_T299	3.02933	-1.5446	7.90904	1.77e-06	1.67e-05	5.33827
GOLIM4_S583	3.02626	-1.89692	6.60624	6.56e-06	5.11e-05	3.8244
DMAP1_S454	3.01598	-2.04538	10.3577	1.08e-08	2.38e-07	10.266
VIM_S83	2.9972	-1.59157	5.83287	1.69e-05	0.000116264	2.73756
ANP32B_T244	2.9878	-2.09793	8.89621	5.91e-08	9.43e-07	8.4817
INPP5F_S1069	2.97325	-0.2971	5.41409	9.75e-05	0.000521711	1.39475
TRIP12_S196	2.9685	-0.933182	10.4708	3.23e-08	5.79e-07	9.29747
NES_S842	2.96502	-2.26629	8.42909	1.29e-07	1.82e-06	7.68741
PLIN3_S31	2.94364	-1.93814	9.3735	2.73e-08	5.06e-07	9.26449
MAP2K4_S91	2.94317	-1.34725	9.10861	1.14e-07	1.63e-06	7.95361
ALB_T551	2.94007	-0.834643	10.3962	5.69e-09	1.44e-07	10.8487
TNKS1BP1_T239	2.93453	-1.50045	11.2675	1.23e-08	2.64e-07	10.2664
MAP1B_S1171	2.92307	-0.917615	7.38069	1.18e-06	1.18e-05	5.5021
PPP1R9B_S205	2.92006	-1.48517	12.7619	1.03e-09	3.8e-08	12.6711
AQP4_S335	2.91383	-0.723364	5.37456	8.22e-05	0.000449413	1.32413
SMARCA4_S1449	2.91269	-1.78167	11.2716	6.06e-09	1.5e-07	10.9072
PACSIN1_S348	2.90944	-0.119357	6.59396	3.68e-06	3.12e-05	4.28271
DCLK2_T700	2.9046	-1.58685	6.13638	1.18e-05	8.46e-05	3.16292
RHBDF2_S177	2.90033	-1.168	6.90574	5.51e-06	4.42e-05	4.0804
CLASP1_T798	2.89575	-1.81	9.15446	6.34e-08	9.98e-07	8.47388
ZC3HC1_S407	2.8926	-1.92646	12.2375	9.01e-10	3.46e-08	12.7543
VIM_S8	2.882	-1.6332	4.64383	0.000398498	0.0017425	-0.182014
NHSL1_S1089	2.85171	-2.07964	7.28372	9.91e-07	1.02e-05	5.61644
FOSL2_S17	2.8488	-2.48131	7.67275	7.1e-07	7.66e-06	6.02029
AHNAK_S2708	2.84845	-1.72869	7.71867	6.56e-07	7.18e-06	6.1007
AHNAK_S3220	2.84845	-1.72869	7.71867	6.56e-07	7.18e-06	6.1007
DCLK2_S372	2.84489	-1.89686	8.8069	6.85e-08	1.06e-06	8.33203
KMT2A_S750	2.8419	-1.39546	7.87446	5.03e-07	5.71e-06	6.37136
ZYX_S143	2.8395	-1.80082	9.00692	2.24e-07	2.9e-06	7.34311
PALLD_S777	2.83475	-1.62618	6.91963	5.39e-06	4.33e-05	4.1267
DNAJC17_S112	2.82983	-2.41933	6.69774	5.58e-06	4.46e-05	3.99038
BMP2K_S949	2.82803	-1.57708	7.61638	1.16e-06	1.16e-05	5.5924
MFF_T138	2.8138	-1.16358	9.19979	9.94e-08	1.46e-06	8.08875
DBNL_S292	2.80313	-1.449	11.1265	3.76e-09	1.02e-07	11.3266
ANK2_S2172	2.79371	-0.502818	6.3766	1.35e-05	9.57e-05	3.18886
RGCC_S91	2.7882	-1.55062	11.6939	1.79e-09	5.89e-08	12.0705
ITIH2_S60	2.78762	-0.876643	9.15816	3.85e-08	6.68e-07	8.91486
AAK1_S797	2.7811	-0.00584615	4.34035	0.000459663	0.00197306	-0.545648
ZDHHC5_S455	2.7724	-1.3742	8.44062	8.36e-07	8.81e-06	6.09068
VIM_S5	2.76538	-1.2348	5.0384	0.000191916	0.00093808	0.712556
NSFL1C_S142	2.7635	-1.32833	9.27362	8.93e-08	1.34e-06	8.21708
VIM_S412	2.75423	-1.81983	7.63406	1.13e-06	1.13e-05	5.62208
CAMSAP2_S416	2.74622	-1.70838	12.0828	1.09e-09	3.94e-08	12.5625
NES_S355	2.74567	-1.73585	5.01096	0.000112106	0.00058865	0.875261
MAP1A_T504	2.74144	-0.989357	5.05367	8.63e-05	0.000468671	1.08504
PTPRA_Y798	2.7388	-2.0666	6.30917	2.1e-05	0.000139911	2.80238
SPP1_T203	2.73749	-0.554214	6.25635	7.16e-06	5.51e-05	3.6065
NCOR1_S2184	2.73294	-1.81042	10.8867	9.88e-09	2.2e-07	10.418
EIF4ENIF1_S670	2.73058	-2.01257	8.55353	1.05e-07	1.53e-06	7.90179
FOXO1_S256	2.72363	-1.33208	11.2797	3.06e-09	8.78e-08	11.5306
GPR84_S221	2.7226	-1.42745	5.59865	5.42e-05	0.000311892	1.74724
JUND_S90	2.71903	-1.3125	6.53084	7.51e-06	5.74e-05	3.68677
AMER2_S233	2.70907	-1.26692	8.96231	8.55e-08	1.29e-06	8.17166
NDRG1_S330	2.70427	-0.734857	5.70427	2.2e-05	0.000145126	2.46935
CIC_S2282	2.69863	-1.82418	7.97988	1e-06	1.02e-05	5.82082
CEP170_S446	2.69835	-2.00492	7.47955	9.93e-07	1.02e-05	5.67881
CD44_S706	2.69771	-1.57664	7.69817	4.65e-07	5.36e-06	6.38641
MICAL1_S979	2.69374	-1.39575	5.45431	5.62e-05	0.000321507	1.63801
PTPRZ1_T1687	2.68849	-1.66571	5.47975	3.5e-05	0.000214919	1.99657
BCL2L13_S395	2.68785	-1.43146	7.27088	1.43e-06	1.4e-05	5.30423
IGF2BP3_S184	2.68556	-2.30083	3.54021	0.00278283	0.00907029	-2.17015
TRMT5_T522	2.68213	-1.2402	7.73335	2.29e-06	2.07e-05	5.16735
MAP7D3_S229	2.68158	-1.979	6.22157	9.98e-06	7.34e-05	3.32978
44078_S101	2.67963	0.520182	5.35197	8.57e-05	0.000465764	1.28114
MAP1B_S1362	2.6661	-1.31608	7.57013	8.48e-07	8.92e-06	5.83954
PHF13_S127	2.6519	-2.01954	10.7005	6.69e-09	1.62e-07	10.7466
FETUB_S315	2.64549	-0.936071	10.0317	9.82e-09	2.19e-07	10.2981
MAP1A_S1776	2.63742	-0.910286	8.43492	1.28e-07	1.81e-06	7.6975
PRAG1_S694	2.62411	-1.98593	7.6753	4.84e-07	5.54e-06	6.34455
NUMBL_S411	2.61547	-1.74757	9.58118	1.97e-08	3.87e-07	9.59626
RTN3_S575	2.60677	-0.231417	5.02452	0.000130857	0.000671654	0.77982
PLEKHA3_S211	2.60567	-1.39327	5.20365	0.000113279	0.00059373	0.997243
MAP4_T96	2.60325	-1.81436	6.6515	8.44e-06	6.34e-05	3.6688
CLU_S185	2.5996	-1.52436	5.78516	3.86e-05	0.000233315	2.09446
PTPRZ1_T1684	2.59902	-1.431	6.01957	1.15e-05	8.31e-05	3.12342
GFAP_S385	2.59773	-1.096	5.93934	1.72e-05	0.000118541	2.77338
PDLIM5_T370	2.59114	-1.3155	8.17319	4.72e-07	5.43e-06	6.50731
PRRC2A_S808	2.589	-1.2965	9.54081	1.96e-07	2.6e-06	7.56097
SRRM2_S1188	2.58569	-1.87543	12.4287	3.45e-10	1.73e-08	13.66
OXSR1_S324	2.58426	-1.80608	6.01792	1.92e-05	0.000130045	2.72974
MAP2_S862	2.57664	-1.27021	5.33223	4.78e-05	0.000280241	1.68297
ADCY8_S614	2.5752	-1.1862	5.66307	6.29e-05	0.000354994	1.68138
ATP2B4_T1145	2.5724	-1.54062	4.68656	0.000220724	0.00105546	0.191658
EIF4G2_T397	2.56648	-1.40777	5.87786	1.95e-05	0.00013133	2.6508
MAP7D1_S399	2.56134	-1.48792	4.4059	0.000458488	0.00196852	-0.486622
RCSD1_S105	2.55963	-0.968917	5.43138	5.87e-05	0.000334351	1.59274
SORBS3_S373	2.55656	-1.3585	9.78031	1.44e-08	2.99e-07	9.90948
CAST_S154	2.55402	-1.59507	6.59159	3.7e-06	3.13e-05	4.27803
PHLDB1_S443	2.54954	-1.22718	8.27638	6.41e-07	7.04e-06	6.29202
RHBDF1_S8	2.5488	-1.1656	6.12693	2.85e-05	0.000181036	2.49211
SERBP1_S25	2.53675	-1.60317	7.12396	2.65e-06	2.35e-05	4.77782
SLC39A14_S321	2.53613	-0.893545	7.64793	1.67e-06	1.59e-05	5.29968
MAP1B_T1864	2.53613	-0.633692	8.6126	1.49e-07	2.06e-06	7.60971
MAP2_S1653	2.53321	-1.42155	5.6762	4.7e-05	0.000277117	1.91866
MTSS1L_S673	2.52482	-1.0725	7.45925	7.17e-07	7.71e-06	5.94543
NGFR_S313	2.52402	-0.584786	3.81363	0.00130107	0.00475307	-1.62955
GPATCH2_S129	2.51634	-1.78867	5.88071	2.48e-05	0.000161168	2.46772
WNK3_S734	2.50168	-1.69073	7.63386	1.71e-06	1.62e-05	5.29763
CRTC3_S329	2.50031	-1.14314	7.56433	5.92e-07	6.59e-06	6.14034
OXR1_S16	2.49707	-0.961857	6.25425	7.19e-06	5.52e-05	3.60225
ASAP3_S862	2.47445	-1.81354	6.71025	3.97e-06	3.33e-05	4.2681
C1orf226_S61	2.46711	-2.08	6.05877	1.06e-05	7.76e-05	3.20389
ALKBH5_S384	2.464	-1.54833	8.0282	5.94e-07	6.6e-06	6.27307
LIMCH1_S1103	2.46098	-1.33886	9.09597	4.26e-08	7.2e-07	8.81281
TTBK1_S654	2.45725	-0.7758	4.44962	0.000574898	0.00238279	-0.390448
RRAGD_T391	2.457	-1.6455	5.04883	8.72e-05	0.000472791	1.07459
SLC35C2_S364	2.4537	-1.77777	10.6174	7.5e-09	1.76e-07	10.6313
PLEC_S4382	2.4514	-1.29615	4.69346	0.000217542	0.00104286	0.206286
CAST_S11	2.44856	-1.38407	8.45425	1.24e-07	1.75e-06	7.73092
PAG1_S295	2.4435	-1.31925	5.04046	0.000126766	0.000653543	0.848991
ARHGAP42_S734	2.44203	-1.58438	7.04626	2.15e-06	1.96e-05	4.89431
CEP170_S1407	2.43954	-1.21667	13.2743	5.83e-10	2.53e-08	13.2337
ATXN2L_S684	2.43303	-1.86267	3.5543	0.00270178	0.00885361	-2.25799
ARPP19_S123	2.43082	-1.25807	8.86468	6.22e-08	9.84e-07	8.42899
ARHGAP12_S103	2.43033	-1.71436	9.64811	1.77e-08	3.54e-07	9.70206
EIF3A_T574	2.42766	-1.08833	7.9111	7.17e-07	7.71e-06	6.08184
AKAP12_S1295	2.42263	-0.8246	5.04468	0.000189724	0.000928492	0.724125
EFS_S287	2.41982	-0.705	6.43476	5.03e-06	4.08e-05	3.96573
CCDC86_S217	2.41885	-1.63592	8.5799	1.57e-07	2.15e-06	7.55637
MAP2_T750	2.41871	-0.708917	8.22239	4.37e-07	5.06e-06	6.58618
NIPBL_S850	2.41751	-1.89742	9.64778	5.23e-08	8.53e-07	8.73842
STK10_S13	2.41673	-1.33862	6.94994	2.55e-06	2.27e-05	4.7164
TBC1D10B_S658	2.41527	-1.12482	5.47759	6.78e-05	0.000379703	1.51947
PALMD_S489	2.41245	-1.17438	5.62681	3.2e-05	0.000198938	2.14542
DOCK10_S1331	2.41216	-0.649071	10.8705	2.86e-09	8.31e-08	11.543
ANK1_S814	2.41047	-1.27577	3.3348	0.0039923	0.0122586	-2.69106
EPB41L3_S88	2.40204	-0.140571	5.77717	1.89e-05	0.000128329	2.62163
CTDSPL2_S9	2.40192	-1.68131	7.4941	9.68e-07	9.97e-06	5.7047
HEPACAM_S364	2.39784	-1.27307	7.86899	3.42e-07	4.14e-06	6.69693
PDLIM1_S90	2.39718	-1.23264	3.65835	0.00183462	0.00637625	-1.96911
ERBIN_S1015	2.39642	-1.7841	8.418	8.63e-07	9.05e-06	6.06852
GOLGA4_S120	2.3943	-1.47618	10.5971	2.76e-08	5.1e-07	9.45527
RASAL3_S865	2.39355	-1.29115	6.38152	7.35e-06	5.63e-05	3.64046
REEP3_S152	2.38442	-1.22264	9.05392	4.56e-08	7.58e-07	8.74353
ARHGAP15_S243	2.38155	-1.86777	6.33353	8.05e-06	6.09e-05	3.54759
SAFB_S197	2.37857	-1.74764	6.74424	7.22e-06	5.54e-05	3.82832
CRKL_S222	2.37749	-1.46067	7.9151	7.12e-07	7.68e-06	6.0884
TACC1_S169	2.37551	-1.45971	6.43544	5.02e-06	4.08e-05	3.96708
SOWAHC_S226	2.36673	-1.69285	7.91768	4.67e-07	5.38e-06	6.44587
ACLY_S509	2.36364	-1.58629	5.94235	1.35e-05	9.55e-05	2.96435
SPAG9_S730	2.36189	-1.27036	10.5413	4.6e-09	1.21e-07	11.0638
DTNA_S662	2.3562	-1.0255	4.61417	0.000223225	0.00106655	0.12911
TNS1_S1421	2.35577	-0.875364	8.90551	2.58e-07	3.25e-06	7.19862
MAP1B_S544	2.35467	-1.21471	5.1883	6.48e-05	0.000364943	1.37491
RPRD1B_S166	2.35206	-1.79483	3.73917	0.00183383	0.00637581	-1.87375
CAMSAP1_S1372	2.35082	-1.20646	5.66013	2.99e-05	0.000188169	2.21293
ERBIN_S915	2.34963	-1.48892	7.20291	1.62e-06	1.55e-05	5.18093
MAP4_T70	2.33963	-0.991583	7.22939	2.22e-06	2.02e-05	4.93176
NAV1_S90	2.33784	-1.3575	6.91313	1.99e-06	1.84e-05	4.90795
DPYSL3_T628	2.33615	-1.68523	3.4368	0.00320624	0.0101942	-2.47594
STK3_S413	2.33433	-1.24764	10.9144	2.68e-09	7.93e-08	11.606
LRRFIP2_S320	2.32488	-1.84167	6.7834	4.79e-06	3.92e-05	4.17571
MPLKIP_S133	2.3248	-1.45433	7.61975	1.15e-06	1.16e-05	5.59807
EVL_S248	2.3242	-1.03608	5.83378	2.12e-05	0.000141119	2.56262
SCAF1_S719	2.3206	-1.65221	5.84184	1.66e-05	0.000114341	2.7562
WDR44_S262	2.31964	-1.432	10.333	6.25e-09	1.53e-07	10.7544
RAI1_S1164	2.31487	-1.51454	9.55112	3.48e-08	6.17e-07	9.08344
GAB2_S133	2.30837	-1.05175	6.30665	1.13e-05	8.15e-05	3.27288
ARAF_S272	2.308	-1.25933	5.35279	6.85e-05	0.000382548	1.43718
PDLIM5_S389	2.3031	-1.22869	6.53301	5.52e-06	4.42e-05	3.93151
VIM_Y117	2.30283	-1.08992	4.67128	0.000266477	0.00124401	0.0604128
CAST_S216	2.3023	-1.128	5.70308	2.75e-05	0.000175813	2.29977
GRAMD2B_T61	2.2994	-0.824615	8.95797	8.61e-08	1.3e-06	8.16479
TNS1_S1124	2.29842	-1.31336	8.13414	2.15e-07	2.8e-06	7.17107
SERPINA1_S38	2.29834	-0.3865	5.57135	4.48e-05	0.000264982	1.86802
MTSS1L_S274	2.29752	-1.00146	5.21358	7.38e-05	0.000409596	1.29754
GOLPH3_S36	2.29564	-1.70057	10.6527	3.91e-09	1.05e-07	11.2273
FAM107A_S74	2.29523	-0.0150833	5.2652	8.13e-05	0.00044492	1.26292
TNS2_S941	2.29238	-1.08007	9.21343	3.52e-08	6.24e-07	9.00515
STX7_S129	2.29162	-0.7718	6.23916	2.36e-05	0.000154225	2.82507
WDR44_T268	2.29114	-1.1358	7.79974	2.08e-06	1.9e-05	5.21054
FLNB_S1474	2.29089	-0.394714	5.29869	5.13e-05	0.000297778	1.61136
ST5_T364	2.28768	-1.783	5.46869	4.4e-05	0.000260978	1.82325
MAP1B_S1852	2.28693	-1.71157	6.6249	3.47e-06	2.97e-05	4.34393
PRRC2C_S924	2.28158	-1.75793	7.01663	1.63e-06	1.56e-05	5.10771
LMOD1_S133	2.28031	-0.491583	5.00402	0.000136319	0.000695802	0.738389
STK10_S438	2.27733	-1.466	7.26845	1.02e-06	1.04e-05	5.58762
TCEA1_S81	2.277	-1.2911	5.08422	0.000176527	0.000870034	0.629034
MAPK1_Y187	2.27658	-1.09171	5.07444	8.26e-05	0.000451709	1.12986
SYNPO_S263	2.27488	-1.16992	3.5624	0.00244635	0.0081483	-2.20963
SH3BP5L_S343	2.2732	-1.79669	7.10348	1.93e-06	1.8e-05	4.99939
SMC3_S1065	2.27298	-1.312	6.00773	1.18e-05	8.49e-05	3.09907
TNRC6B_S1432	2.2705	-1.0348	4.83899	0.000276965	0.00128612	0.187282
LMNA_S404	2.26758	-1.34893	4.30696	0.000437543	0.00188703	-0.54514
RTN1_T279	2.26703	-0.938364	4.01316	0.00116603	0.00433271	-1.36011
LRCH2_S521	2.26667	-0.756143	6.22434	7.63e-06	5.82e-05	3.54161
INTS1_S13	2.26542	-1.174	6.96716	7.29e-06	5.59e-05	3.89658
OSBPL11_S15	2.26309	-1.19833	6.87315	4.1e-06	3.41e-05	4.30532
MRC2_S1457	2.25911	-2.15936	6.99185	4.78e-06	3.91e-05	4.24832
PTK2_Y661	2.25878	-1.34407	10.2077	7.53e-09	1.77e-07	10.5659
VTN_S364	2.2572	-1.02685	5.19305	7.7e-05	0.000424428	1.25494
NCOR2_S1025	2.25695	-1.68769	7.40705	1.13e-06	1.14e-05	5.54935
MOSPD2_S273	2.25375	-0.621455	6.27	1.63e-05	0.000112823	2.99991
TJP2_S472	2.25253	-0.897455	4.58594	0.000372786	0.00164542	-0.211187
SPP1_S208	2.25196	-0.598818	4.70635	0.000294518	0.00135268	0.0562398
EXOC2_S432	2.25	-1.33343	8.32018	1.56e-07	2.14e-06	7.4981
CDC42EP4_T188	2.24813	-0.485455	4.74017	0.00027573	0.00128177	0.0941183
THRAP3_S698	2.2441	-1.47938	7.69358	6.85e-07	7.42e-06	6.05679
RIF1_S1616	2.24379	-1.16336	7.41097	2.42e-06	2.17e-05	4.93977
TOP2B_S1466	2.2425	-1.219	6.88285	8.32e-06	6.27e-05	3.76159
EHBP1_S649	2.23864	-1.10593	7.09794	1.4e-06	1.37e-05	5.26362
KDM2B_S795	2.2374	-1.46475	8.11334	5.19e-07	5.85e-06	6.41096
ADAM10_S740	2.2332	-1.04891	5.83886	3.5e-05	0.000214807	2.19357
ERC1_S55	2.23229	-1.67264	6.85288	2.23e-06	2.03e-05	4.79098
LARP1_T711	2.22933	-1.25414	4.40836	0.000350155	0.00156298	-0.322258
HS1BP3_S194	2.22694	-1.06525	8.15791	4.83e-07	5.53e-06	6.48277
TNKS1BP1_S1554	2.22665	-1.57885	4.4861	0.000337137	0.00151798	-0.234489
GAB1_S419	2.22609	-1.39586	7.97625	2.83e-07	3.52e-06	6.88989
ARHGAP21_S616	2.226	-0.698	9.30762	2.63e-07	3.31e-06	7.26105
DDX17_S601	2.22589	-1.59293	6.14729	8.91e-06	6.64e-05	3.38489
KNG1_S332	2.22036	-0.628571	7.57703	5.79e-07	6.45e-06	6.16379
NFIC_S323	2.22005	-1.62538	5.47303	4.36e-05	0.000258854	1.83214
ABCC1_S930	2.21403	-1.48092	7.81442	8.38e-07	8.82e-06	5.92257
SCAF11_S816	2.214	-1.87791	9.14514	1.85e-07	2.47e-06	7.55257
ARHGEF18_S1160	2.20707	-0.923455	8.06617	8.78e-07	9.19e-06	5.95388
AMPH_T310	2.2062	-0.172071	5.40842	4.07e-05	0.000244536	1.84522
FGD2_S48	2.20288	-0.8438	4.19521	0.000934879	0.00360055	-0.877501
KIAA1109_S1323	2.1984	-1.42786	8.06003	2.44e-07	3.12e-06	7.03951
DDX17_S574	2.1977	-0.736231	6.5023	5.85e-06	4.65e-05	3.87277
FHOD1_S357	2.1964	-1.48523	7.80985	5.61e-07	6.28e-06	6.2595
PHYHIPL_S15	2.19629	-0.6585	7.15076	1.27e-06	1.26e-05	5.36442
MTFR1L_S238	2.19575	-1.39223	10.2799	1.2e-08	2.6e-07	10.1551
SH3KBP1_S255	2.19342	-1.51286	8.49132	1.16e-07	1.66e-06	7.79486
PHF2_S1056	2.19295	-1.25231	7.07902	2.02e-06	1.87e-05	4.95453
MTSS1L_S342	2.19016	-1.10336	6.45058	4.87e-06	3.97e-05	3.99738
SGIP1_S554	2.1847	-0.575231	4.79889	0.000174364	0.000860843	0.429302
STAT3_S701	2.17862	-0.913143	5.28938	5.23e-05	0.000302389	1.59147
DENND4C_S1175	2.17847	-1.29445	4.50876	0.000433929	0.00187406	-0.364739
PHF3_S1642	2.17725	-1.0416	6.6357	1.23e-05	8.83e-05	3.36015
CTTNBP2NL_S549	2.17687	-1.88825	8.58509	2.49e-07	3.17e-06	7.18092
VIM_S420	2.17533	-1.95643	4.85973	0.00013102	0.000671865	0.664843
USP6NL_S593	2.174	-1.0148	6.18568	2.58e-05	0.000166281	2.59264
LRP1_S4523	2.17195	-1.45038	8.09497	3.47e-07	4.18e-06	6.74888
AHNAK_S5864	2.17183	-0.8486	5.17325	0.000150188	0.00075744	0.809814
PPP3CB_S479	2.17058	-0.290571	6.94111	1.89e-06	1.76e-05	4.96209
MAP4_S865	2.16997	-1.45677	6.77321	3.53e-06	3.01e-05	4.38661
PXN_S106	2.16924	-0.954714	6.15415	8.79e-06	6.57e-05	3.39887
SH3GL2_T282	2.1663	-0.00230769	6.87016	2.96e-06	2.58e-05	4.56806
PLA2G4C_S347	2.16064	-0.917786	7.91843	3.14e-07	3.84e-06	6.78606
MAP1A_S1749	2.15986	-0.0239167	7.8949	7.36e-07	7.88e-06	6.05524
MAP1B_S1899	2.15882	-0.667214	6.15748	8.73e-06	6.53e-05	3.40566
AFAP1_S632	2.15849	-1.887	5.32512	4.85e-05	0.000283649	1.66781
PPP1R1B_S137	2.1556	-0.110923	4.05969	0.000838201	0.00328023	-1.14661
GAB2_S543	2.1553	-0.852538	8.44524	1.95e-07	2.59e-06	7.33523
PRKAA1_S511	2.15362	-1.62107	9.39539	2.63e-08	4.91e-07	9.29971
MYO9B_S1290	2.1534	-1.54493	11.5786	1.06e-09	3.87e-08	12.5349
SRSF6_S249	2.14853	-1.34373	6.52798	1.04e-05	7.62e-05	3.43043
USP8_S641	2.14816	-1.53536	9.2715	3.21e-08	5.77e-07	9.0996
SYN3_S405	2.14804	-0.0912857	5.05401	8.63e-05	0.00046846	1.08577
EIF4EBP1_S65	2.14797	-1.04582	4.63517	0.000338478	0.00152368	-0.113506
MAP4_S99	2.14784	-1.28736	9.1462	3.93e-08	6.77e-07	8.89528
LDB2_S270	2.14425	-1.5643	2.83253	0.013503	0.0341137	-3.69443
PSMF1_S252	2.14065	-1.10292	7.76591	6.05e-07	6.7e-06	6.18312
FAM102A_S231	2.13839	-1.51355	5.749	4.12e-05	0.000247002	2.05379
LYAR_S276	2.13682	-0.952071	3.88179	0.00111886	0.00418209	-1.48006
CUEDC1_S10	2.13426	-1.18458	5.75255	3.17e-05	0.000197236	2.22075
ATF2_S90	2.13324	-1.30457	3.88305	0.00111574	0.00417405	-1.47729
MAP2_S1451	2.12911	-1.60671	5.99761	1.2e-05	8.65e-05	3.07825
HDGFL2_S478	2.12576	-1.58536	5.77828	1.89e-05	0.000128121	2.62396
ANK2_S2201	2.1256	0.0395385	5.87222	1.97e-05	0.000132473	2.63953
RSF1_T1278	2.12443	-1.42025	6.59016	6.75e-06	5.23e-05	3.79512
EEF2K_S462	2.12386	-1.91392	4.52697	0.000357655	0.00158907	-0.236477
NES_S578	2.12382	-2.13671	4.55655	0.000253134	0.00118888	0.00291577
KIAA0556_S691	2.12029	-1.26464	9.64832	1.77e-08	3.54e-07	9.70239
FBXO38_S654	2.1194	-1.00907	6.43702	5.01e-06	4.07e-05	3.97025
HTT_S1866	2.1172	-1.25083	7.41357	1.62e-06	1.56e-05	5.24873
SAMHD1_S18	2.1164	-1.33614	5.49766	3.37e-05	0.000208095	2.03447
GOLGA4_S93	2.11602	-1.3405	9.30777	3.03e-08	5.53e-07	9.15838
AKAP12_S1512	2.11504	-0.237071	5.36997	4.41e-05	0.000261677	1.7634
NUMB_T436	2.11475	-1.46838	5.63269	3.16e-05	0.000197039	2.15735
MAP1A_T1957	2.11363	-0.18575	5.27763	7.93e-05	0.000435848	1.2877
MAP7_S345	2.11306	-0.526417	5.16062	9.99e-05	0.000532032	1.05376
PPP3CA_S469	2.11082	-0.0793571	5.38568	4.27e-05	0.000254239	1.79685
MAST2_S92	2.10887	-1.11092	7.19594	2.35e-06	2.12e-05	4.90301
EIF4G1_S1084	2.1085	-1.4771	2.63983	0.0196559	0.0468737	-4.05632
BCLAF3_S139	2.10812	-1.89431	6.29806	8.62e-06	6.46e-05	3.47878
AVEN_S94	2.10675	-1.3305	7.65619	1.09e-06	1.1e-05	5.68657
OXR1_S204	2.10656	-0.459214	5.59931	2.73e-05	0.000174716	2.24902
SPP1_T240	2.1062	-0.288636	5.52621	6.2e-05	0.00035055	1.61116
YBX1_S176	2.10002	-2.28121	4.57211	0.000244677	0.00115481	0.0370092
CD33_T299	2.09914	-1.18882	6.09138	2.23e-05	0.000146941	2.67973
RAPH1_S571	2.099	-1.45742	9.25925	9.12e-08	1.36e-06	8.17635
SAMSN1_T110	2.09646	-1.34736	4.47273	0.000465915	0.00199573	-0.407184
ALKBH5_S64	2.0935	-1.66092	6.25929	1.23e-05	8.81e-05	3.21753
PHF2_S655	2.0932	-1.18343	8.48096	1.18e-07	1.68e-06	7.77701
STK10_S20	2.09213	-1.49014	7.48778	6.81e-07	7.39e-06	5.9985
PCYT1A_S323	2.08965	-1.42154	7.8415	5.32e-07	5.97e-06	6.31437
GFAP_S13	2.08891	-0.553071	5.53922	3.09e-05	0.000193519	2.12233
MAP1A_S2427	2.08691	-0.0371667	4.96974	0.000145982	0.000737706	0.669015
TRIM33_S1119	2.08453	-1.56486	8.57334	1.01e-07	1.48e-06	7.93574
RTN4_S806	2.08373	-0.337143	7.03552	1.58e-06	1.52e-05	5.14402
TNKS1BP1_S1545	2.08004	-1.47857	6.22739	7.59e-06	5.79e-05	3.54781
DDX42_S754	2.0776	-1.36692	4.26352	0.000541583	0.00226545	-0.709986
SEC61B_S17	2.07638	-1.63721	5.8485	1.63e-05	0.000113063	2.77004
DNM1_S774	2.07564	-0.350143	3.76009	0.00146477	0.00525294	-1.74679
AQP4_S285	2.07456	-0.759643	6.27669	6.88e-06	5.31e-05	3.64768
GTF2I_S103	2.07396	-0.868857	8.56881	1.02e-07	1.49e-06	7.92797
TRIP12_S1106	2.07253	-1.048	5.8451	2.07e-05	0.000138487	2.58529
PDCD4_S67	2.06917	-1.05354	8.16604	3.08e-07	3.78e-06	6.86916
LPIN2_S106	2.06833	-1.34362	7.17931	1.69e-06	1.61e-05	5.13796
WDR44_T271	2.06767	-0.770615	6.11283	1.23e-05	8.82e-05	3.11664
CDC42EP4_S298	2.06613	-1.52243	3.9405	0.000982536	0.00375255	-1.35115
MAP4_S928	2.06582	-1.34943	4.52111	0.000273519	0.00127305	-0.0747702
MICALL1_S640	2.065	-1.01177	5.01318	0.00011159	0.000586096	0.87992
SYN2_S542	2.06474	-0.566833	3.66107	0.0021599	0.00733974	-2.03625
SBNO1_S794	2.0644	-1.06564	3.9479	0.00133001	0.00484554	-1.49199
TAOK1_S965	2.06364	-1.35343	7.28916	9.81e-07	1.01e-05	5.62669
SIRT1_S27	2.06197	-1.12631	7.79856	5.72e-07	6.39e-06	6.2399
MPRIP_S619	2.06089	-1.14173	7.04225	4.4e-06	3.64e-05	4.33276
PALLD_S641	2.05873	-0.638071	3.6419	0.00190263	0.0065865	-2.005
MAPT_S597	2.05469	-0.712071	8.06307	2.43e-07	3.11e-06	7.04492
TOP2B_S1375	2.0546	-1.38421	7.26274	1.03e-06	1.05e-05	5.57682
CNOT2_S165	2.053	-1.25042	4.88368	0.000173475	0.000857086	0.531783
AKT1S1_T266	2.05242	-1.2217	5.55683	7.58e-05	0.000419202	1.50703
44078_S115	2.05223	-0.00933333	4.72709	0.000237946	0.0011278	0.174795
MAP1B_S828	2.05049	-0.807571	7.64035	5.16e-07	5.83e-06	6.28042
SNTB2_S222	2.04949	-0.880929	4.37013	0.00038081	0.00167559	-0.406255
MAP3K7_S417	2.04786	-1.06058	5.82038	2.78e-05	0.00017776	2.35172
GLCCI1_S406	2.04709	-1.53079	6.68281	3.1e-06	2.69e-05	4.45815
UHRF1BP1L_S953	2.04655	-1.21562	8.79749	1.11e-07	1.6e-06	7.90875
AKAP13_T2415	2.04413	-1.6338	5.14645	0.000157657	0.000790167	0.910624
AP3B1_T810	2.04396	-1.07545	6.70402	7.73e-06	5.88e-05	3.75928
ITPRID2_S665	2.04387	-1.9401	3.90245	0.00164813	0.00580924	-1.44338
PCYT1A_S319	2.0424	-1.38164	6.11016	2.16e-05	0.000142977	2.68834
DOCK4_S1623	2.0415	-0.5157	4.34766	0.000698025	0.00280518	-0.585009
KIF5C_T396	2.04137	-0.0216667	5.86249	2.57e-05	0.000165842	2.4671
SCRIB_T475	2.04113	-1.32536	4.93689	0.000110946	0.000583168	0.832355
SGIP1_T186	2.03971	-0.369643	6.14148	9.01e-06	6.7e-05	3.37304
MAP3K5_S82	2.03582	-1.41427	5.8109	3.68e-05	0.000223967	2.16813
MACF1_S1377	2.0334	-1.00975	5.47738	5.37e-05	0.000309285	1.68347
KANK1_T1341	2.03285	-1.09338	5.35459	5.54e-05	0.000317775	1.589
GIGYF1_S157	2.03125	-1.9595	5.09883	0.000171896	0.000850743	0.823519
LRPAP1_S50	2.03	-1.709	4.68037	0.000193263	0.000943251	0.273868
SPAG9_S251	2.02933	-1.34157	9.98572	1.05e-08	2.33e-07	10.2276
AGAP2_S1177	2.02873	-0.581786	4.03032	0.000805491	0.00317317	-1.15371
FYB1_S219	2.02744	-1.01336	7.33835	8.96e-07	9.35e-06	5.71928
NES_T105	2.02553	-1.08408	3.45556	0.00307938	0.00985929	-2.43626
ARHGAP31_S272	2.025	-1.08915	6.57907	5.07e-06	4.1e-05	4.0194
IGF2R_S2479	2.02455	-1.29708	5.63204	3.17e-05	0.000197236	2.15602
SYMPK_S1259	2.02155	-1.79623	6.39179	7.21e-06	5.53e-05	3.66028
SLC30A1_S173	2.02148	-1.31338	7.16303	1.74e-06	1.64e-05	5.10828
TNRC6B_S1816	2.01987	-1.267	5.07161	9.89e-05	0.00052721	1.00209
KIAA1217_T68	2.01787	-1.154	4.47967	0.000299481	0.00137297	-0.165673
HEATR3_T340	2.01714	-1.04667	8.68514	2.14e-07	2.78e-06	7.31257
FCHO2_S312	2.0167	-1.49782	7.60293	1.79e-06	1.68e-05	5.2279
KIAA1217_S1794	2.01604	-0.842429	6.51805	4.27e-06	3.54e-05	4.132
ATXN2L_S339	2.01342	-1.48823	6.83047	3.18e-06	2.75e-05	4.49394
TOP2B_T1292	2.01335	-1.21938	5.58632	3.47e-05	0.000213034	2.06319
AHCTF1_S1241	2.01182	-1.13371	6.89282	2.07e-06	1.9e-05	4.86857
MAGI1_S741	2.01123	-1.44464	4.33343	0.000614067	0.00251746	-0.715227
SPP1_T86	2.00895	-0.0530769	4.81905	0.00016716	0.000831182	0.47186
FMNL2_S1016	2.00784	-0.308357	5.48842	3.44e-05	0.000211699	2.01493
YAP1_S61	2.00671	-1.68258	6.44427	8.78e-06	6.57e-05	3.52776
RAI14_T300	2.00567	-0.8464	3.41099	0.0043231	0.0130907	-2.57709
STAC2_S48	2.00469	-0.065	4.18745	0.000719923	0.00288169	-0.939953
TNKS1BP1_S836	2.00407	-1.54893	8.77728	7.19e-08	1.11e-06	8.28216
RTN4_S933	2.004	-0.59775	6.04049	1.84e-05	0.000125573	2.80635
CHD7_S1874	2.00317	-0.9354	3.49011	0.00369898	0.0114773	-2.42235
HTATSF1_S387	2.00263	-1.51738	5.37949	5.26e-05	0.000304355	1.64023
MAP1B_S541	2.00091	-0.8555	3.34011	0.00370233	0.0114853	-2.65836
SPATA6_S265	1.99975	-0.978615	7.0077	2.3e-06	2.08e-05	4.82323
PIKFYVE_S1754	1.99972	-1.431	7.7507	6.21e-07	6.85e-06	6.15661
PBXIP1_S43	1.99858	-0.69	4.26607	0.000478743	0.00204114	-0.635061
RBM34_S14	1.9984	-1.21529	6.33478	6.13e-06	4.82e-05	3.76494
CIRBP_S148	1.9978	-1.63791	3.56462	0.00289333	0.0093607	-2.26718
CLN6_S31	1.99762	-1.50679	9.16142	3.83e-08	6.67e-07	8.9202
NAV1_S452	1.9952	-1.15743	7.29794	9.65e-07	9.96e-06	5.64324
FAM53C_S299	1.99507	-1.71654	8.94831	8.74e-08	1.32e-06	8.14947
AGAP1_T836	1.99425	-0.7008	6.94528	7.55e-06	5.76e-05	3.86165
SRGAP1_S917	1.99347	-1.13571	5.73084	2.08e-05	0.000138743	2.52492
MAP4_S941	1.9933	-1.24085	4.64335	0.000241753	0.00114282	0.100015
PRKACB_S34	1.99196	-1.18714	2.93913	0.00887033	0.023985	-3.50525
TSC2_S1365	1.99192	-1.3139	7.22944	4.86e-06	3.97e-05	4.31019
CTTN_S11	1.99175	-1.09169	4.24793	0.000559929	0.00233204	-0.743344
FLNC_S2624	1.99125	-0.8855	5.19918	0.000143312	0.000726397	0.857539
REEP2_S152	1.98956	-0.952	7.87788	3.37e-07	4.08e-06	6.71298
ALB_S89	1.98885	-0.599308	9.29657	5.1e-08	8.37e-07	8.69445
NES_S1560	1.9884	-1.53523	5.01012	0.000112301	0.000589366	0.873506
SPAST_T303	1.98744	-0.990643	4.79496	0.000150715	0.00075972	0.523892
MBP_S96	1.98642	-1.14579	8.92785	5.61e-08	9.06e-07	8.53449
SRRM2_S988	1.985	-1.5219	5.59769	7.05e-05	0.000392458	1.56473
USP6NL_S612	1.98158	-1.0892	7.65612	2.56e-06	2.28e-05	4.96289
MAP1B_S2098	1.98032	-0.781462	5.77636	2.38e-05	0.000155025	2.44742
FBXO6_S284	1.9802	-0.843909	2.66303	0.0179291	0.0433871	-4.04901
PLEKHO2_S439	1.9796	-1.4352	4.13972	0.00104035	0.0039371	-1.1699
CRKL_Y198	1.97936	-1.20664	7.30212	9.58e-07	9.9e-06	5.65113
ZC3HAV1_S335	1.97762	-1.85393	5.67526	2.33e-05	0.000152644	2.40859
ALB_T260	1.97654	-0.271583	6.33993	1.06e-05	7.74e-05	3.33475
PML_S505	1.97589	-1.17021	2.75963	0.0130273	0.033082	-3.87287
APC_S2812	1.97475	-1.28691	3.8499	0.00162139	0.005728	-1.65955
MTM1_S13	1.97274	-0.973167	9.25046	9.23e-08	1.38e-06	8.16342
EXOC1_T568	1.97182	-0.951	5.57518	2.87e-05	0.000182032	2.1982
HDGF_T223	1.97153	-1.60921	5.40237	4.12e-05	0.000247002	1.83236
GAB1_T211	1.96903	-0.735308	7.76004	6.11e-07	6.76e-06	6.17288
SOX6_S111	1.96867	-1.42757	4.68455	0.000191513	0.000936564	0.283011
NCBP1_S7	1.96696	-1.09907	5.11035	7.65e-05	0.000422252	1.20726
AAK1_S731	1.9646	-0.0935	8.47746	7.95e-07	8.43e-06	6.14225
TNS1_S1381	1.96382	-1.01531	8.28643	2.53e-07	3.2e-06	7.07139
CEP131_S78	1.96378	-1.73508	6.40632	7.01e-06	5.4e-05	3.68832
NAV1_S797	1.96075	-1.01617	6.25145	1.25e-05	8.91e-05	3.20291
ADD1_S59	1.9596	-0.1144	6.12367	2.86e-05	0.000181636	2.48651
SLC43A2_S297	1.957	-0.3495	6.61454	1.28e-05	9.09e-05	3.31181
PRUNE2_S699	1.95677	-1.00477	4.9203	0.000135328	0.000691321	0.685071
MAP1B_T1853	1.9566	-0.33675	4.94281	0.000154067	0.000774098	0.614433
PLG_T742	1.95571	-0.683545	5.09098	0.000140286	0.00071303	0.807852
GYS1_S698	1.95445	-1.34754	4.24464	0.000563887	0.00234561	-0.750395
MTMR3_S647	1.95298	-1.30229	6.62256	3.48e-06	2.98e-05	4.3393
TMCC2_S438	1.9514	-0.677071	8.18252	1.97e-07	2.62e-06	7.25655
KLC4_S537	1.95109	-0.856071	5.43415	3.85e-05	0.000233205	1.89987
CIC_S1648	1.95034	-0.8125	9.80542	4.2e-08	7.11e-07	8.96148
SPAG9_S203	1.9484	-0.726	6.73679	1.05e-05	7.66e-05	3.51205
44083_S85	1.9475	-1.88146	7.2133	1.59e-06	1.53e-05	5.19981
SRGAP3_S954	1.9472	-0.722571	5.38541	4.27e-05	0.000254308	1.79628
TSC22D3_S188	1.94667	-1.12343	7.45675	7.21e-07	7.74e-06	5.94077
ARAP3_S1337	1.9444	-1.62415	5.20487	7.52e-05	0.00041631	1.27948
TIAM1_S52	1.9433	-1.34508	4.90168	0.000140677	0.000714661	0.64593
MAP1B_S2100	1.94291	-0.494167	5.67849	3.65e-05	0.000222404	2.07709
RPTOR_S722	1.9418	-1.38215	9.00698	7.97e-08	1.22e-06	8.24233
RELL1_S109	1.94122	-1.156	5.60502	3.34e-05	0.000206449	2.1012
ARHGEF17_S546	1.94085	-1.19477	5.0022	0.00011416	0.000597723	0.856912
PREX1_S1001	1.94043	-1.14131	4.75927	0.000189456	0.000927631	0.345594
BAG3_S381	1.93784	-0.847357	3.73847	0.00153659	0.0054706	-1.79411
WWTR1_T67	1.93709	-1.09917	5.7262	3.33e-05	0.000205852	2.16972
EIF3C_T262	1.93667	-0.833364	6.95266	5.1e-06	4.13e-05	4.15974
MAP2_T1628	1.93664	-1.18679	3.85648	0.00118333	0.00438467	-1.53559
SOX13_S335	1.9356	-1.52454	6.3505	7.8e-06	5.92e-05	3.58046
ZFP36L1_S161	1.93525	-1.1169	5.24909	0.000130983	0.000671847	0.949165
TNC_S70	1.9348	-0.2932	5.52791	7.97e-05	0.00043795	1.43959
LSM14A_S192	1.93433	-1.4165	6.41158	5.26e-06	4.24e-05	3.91929
DAB2IP_S882	1.93333	-1.18786	5.08755	8.03e-05	0.000440782	1.15814
TEX2_S222	1.93329	-1.15643	6.48983	4.51e-06	3.72e-05	4.07576
TNKS1BP1_S1666	1.933	-1.27654	8.00342	4.04e-07	4.74e-06	6.59293
USP20_S388	1.93214	-0.804083	4.65441	0.000275774	0.00128177	0.0257908
EPB41L2_T815	1.93046	-1.0135	5.85301	2.62e-05	0.000168512	2.41452
AMER2_S229	1.92992	-0.8932	5.71816	5.72e-05	0.000326686	1.79444
TNKS1BP1_S762	1.9264	-1.0036	5.67079	6.21e-05	0.000350944	1.6951
ARHGAP45_S594	1.92638	-1.14079	4.72266	0.000176292	0.000869085	0.366247
TLE4_S222	1.9259	-0.871769	5.37164	5.35e-05	0.000308278	1.62409
DHX57_S74	1.92306	-1.56158	5.60561	4.19e-05	0.000250439	1.93501
AKAP13_S2713	1.92293	-1.55457	8.10218	2.27e-07	2.93e-06	7.11443
PHF8_S1021	1.92277	-1.04042	6.33121	1.08e-05	7.84e-05	3.31855
SCAF1_S564	1.92225	-1.6251	4.8787	0.000257351	0.00120616	0.261918
HUWE1_S2595	1.9212	-0.9622	4.11219	0.00109713	0.0041123	-1.22347
PODXL_S537	1.92112	-0.930231	5.50973	4.05e-05	0.000243469	1.90715
CLASP1_S1196	1.9206	-1.0525	3.84631	0.00183884	0.00638543	-1.7427
DFFA_S110	1.91858	-1.23557	5.32263	4.87e-05	0.000284954	1.66247
PDZD2_S1005	1.9173	-0.844077	6.40935	6.97e-06	5.38e-05	3.69415
PLG_S45	1.91592	-1.0178	6.8747	8.43e-06	6.33e-05	3.7485
SLC4A4_S86	1.91433	-0.376643	5.4906	3.42e-05	0.00021093	2.01954
ERC1_S21	1.91202	-1.57636	3.21815	0.00483767	0.014398	-2.91904
SDC3_T430	1.912	-0.7357	5.13756	0.000160217	0.000801206	0.743992
SHROOM4_S282	1.91051	-1.25579	8.03747	2.54e-07	3.22e-06	6.99931
MAGED2_T72	1.90996	-1.06143	9.36666	2.76e-08	5.1e-07	9.25346
AXIN1_S486	1.90767	-1.02655	9.0444	2.12e-07	2.77e-06	7.39618
MINK1_S601	1.90649	-0.901	5.93103	1.38e-05	9.74e-05	2.94097
NES_S1409	1.90613	-1.16225	2.67768	0.0166843	0.0408059	-3.98808
GOLGA5_S116	1.90306	-1.18692	9.5688	5.85e-08	9.37e-07	8.6256
VIPAS39_S121	1.90176	-1.12336	8.56285	1.03e-07	1.51e-06	7.91776
TLE3_S240	1.9016	-0.840636	6.3311	1.46e-05	0.000102311	3.08377
CLASP2_S1176	1.90153	-0.866214	7.51627	6.46e-07	7.09e-06	6.05139
DNM1_S778	1.9008	0.363857	3.64546	0.00188768	0.00654261	-1.99722
SPAG9_T226	1.89942	-0.822857	6.31219	6.41e-06	5.02e-05	3.71939
SLC12A7_T30	1.89791	-1.45429	6.14815	8.89e-06	6.63e-05	3.38663
GCFC2_S180	1.8972	-1.25643	7.43104	7.55e-07	8.06e-06	5.89284
SNAP23_S110	1.89696	-1.05907	8.61359	9.45e-08	1.4e-06	8.00454
NES_S1577	1.89696	-1.94807	5.77918	1.88e-05	0.000127929	2.62582
CDC42EP4_S322	1.8969	-1.14992	5.26781	6.61e-05	0.000371305	1.40989
PLIN3_T38	1.89595	-1.36754	3.65484	0.00200436	0.0068847	-2.01283
LIMD1_T386	1.89563	-1.21558	5.1973	9.29e-05	0.0005	1.12726
GPRIN1_S895	1.89466	-0.730417	4.97511	0.000144425	0.000730755	0.679875
CABLES1_S311	1.89446	-0.8175	5.943	2.21e-05	0.00014589	2.58698
PHLDB1_S678	1.89413	-1.17786	6.60899	3.57e-06	3.05e-05	4.31246
AAK1_S637	1.89336	-0.989357	5.48603	3.46e-05	0.000212436	2.00987
ABLIM1_S352	1.89332	-0.415923	6.44481	6.52e-06	5.09e-05	3.76244
ARHGEF17_S961	1.8932	-0.637167	5.95283	2.17e-05	0.000143745	2.60574
ARHGAP5_S1218	1.89027	-0.895571	7.34926	8.78e-07	9.19e-06	5.73976
CDK18_S14	1.88975	-0.2696	4.25312	0.000836443	0.00327526	-0.932283
CLASP2_S641	1.88711	-0.705143	6.23036	7.54e-06	5.76e-05	3.55384
TRIM28_T541	1.88651	-1.43336	6.74516	2.75e-06	2.42e-05	4.58062
CARHSP1_S30	1.88555	-1.26054	3.55164	0.00250374	0.00830653	-2.2325
ANXA1_S34	1.88523	-0.913909	5.16644	0.000121547	0.000630196	0.925608
STAT3_Y705	1.8849	-1.00054	4.11752	0.000740346	0.00295231	-1.02267
MSN_S407	1.88485	-1.10131	5.46678	4.41e-05	0.000261677	1.81934
TP53BP1_S644	1.88373	-1.29362	6.45351	6.41e-06	5.03e-05	3.77915
AKAP12_T160	1.88371	-0.927727	2.82094	0.0130773	0.0331797	-3.71354
STK10_S516	1.88243	-0.972615	5.07333	9.85e-05	0.000525907	1.00566
ARFIP1_S39	1.88227	-1.03143	5.57352	2.88e-05	0.000182546	2.19471
CD44_S704	1.87958	-1.0625	6.44261	4.95e-06	4.03e-05	3.98144
PRRC2B_S480	1.87795	-1.42046	5.20227	7.56e-05	0.000418309	1.27408
PPP2R5B_S44	1.87504	-1.06379	4.55137	0.000256013	0.00120049	-0.00842869
ACBD7_T68	1.87244	0.154286	6.80439	2.45e-06	2.19e-05	4.69649
FAM122A_S104	1.87243	-0.97125	6.10687	1.63e-05	0.000112824	2.89826
NAV1_S672	1.86967	-1.07293	6.51924	4.26e-06	3.53e-05	4.13436
NES_S1286	1.86789	-2.014	2.97717	0.00901874	0.0243088	-3.43899
SYN1_S641	1.86564	-0.194143	7.16738	1.23e-06	1.22e-05	5.39605
LPAR1_S240	1.86492	-1.2147	3.51405	0.00352858	0.0110363	-2.37547
KLC2_S556	1.8643	-0.530462	6.19959	1.04e-05	7.61e-05	3.28683
SPECC1_S914	1.86376	-1.14893	6.04866	1.09e-05	7.9e-05	3.18315
FMNL1_S624	1.86328	-1.00823	4.06971	0.000820349	0.00322225	-1.12513
ARL6IP4_S221	1.8625	-1.3335	4.19071	0.000943012	0.00362426	-0.886164
AHNAK_S4908	1.86229	-1.22833	4.73518	0.000234076	0.00111227	0.191364
LRRC41_T327	1.86202	-1.16921	6.06688	1.05e-05	7.65e-05	3.22051
RRAD_S39	1.86127	-0.731636	4.0832	0.00101277	0.00384835	-1.2187
NHSL1_S1461	1.86107	-1.01182	7.94299	1.06e-06	1.08e-05	5.78288
CD74_S8	1.86095	-0.849	4.21432	0.000601672	0.0024752	-0.81531
WDFY3_S2434	1.86043	-0.826182	7.52172	2.03e-06	1.87e-05	5.09768
LTB4R_S320	1.86009	-0.899571	5.57907	2.85e-05	0.000181045	2.2064
CARMIL1_S1254	1.85842	-1.3345	5.31929	4.91e-05	0.000286667	1.65535
SRRM1_S677	1.85797	-1.53464	5.24369	0.000105032	0.000557019	1.07414
DCLK1_S346	1.85791	-0.487571	4.87838	0.000125851	0.000649146	0.705374
PTPN13_S240	1.85563	-1.13225	4.85061	0.000185405	0.00091023	0.427039
CLASP2_S1250	1.85516	-0.359	5.94428	1.34e-05	9.52e-05	2.96833
APC_S2742	1.85466	-1.47308	4.88499	0.000173018	0.000855355	0.497005
SLAIN1_S425	1.85313	-0.3995	5.31552	4.95e-05	0.000288623	1.64731
IRF2BPL_S334	1.853	-1.08773	5.30491	9.36e-05	0.000503029	1.19134
ASAP1_S910	1.85292	-1.36246	6.99831	2.34e-06	2.11e-05	4.8059
USP32_S1386	1.85242	-1.0897	5.1311	0.000162107	0.000809048	0.732058
CLCN7_S9	1.84758	-1.19393	7.63305	5.23e-07	5.89e-06	6.26701
SRRM2_S1124	1.84613	-1.586	3.90282	0.00106798	0.00402625	-1.4339
ARHGAP29_T948	1.84475	-1.4196	4.59843	0.000433976	0.00187406	-0.268489
KNG1_S329	1.84163	-0.5528	3.05848	0.00866382	0.0235054	-3.07936
NES_S680	1.84087	-1.61221	5.92623	1.39e-05	9.82e-05	2.93105
SAMSN1_S142	1.83962	-1.07721	5.5167	3.24e-05	0.000201395	2.07474
PPP2R5C_S552	1.8385	-1.17292	7.67871	1.05e-06	1.06e-05	5.72417
TBC1D15_S70	1.83742	-1.258	7.63841	5.18e-07	5.84e-06	6.27685
FRMD8_S20	1.83742	-1.6192	2.66961	0.0185524	0.0446755	-4.00089
CAD_S1406	1.83596	-1.49786	5.81854	1.74e-05	0.000119201	2.70777
ZFYVE16_S896	1.83587	-1.01677	6.17114	1.1e-05	7.97e-05	3.23112
NF2_T581	1.83518	-1.01954	7.03232	2.2e-06	2.01e-05	4.86864
RRM2_S80	1.83443	-1.713	3.04462	0.00832879	0.0227311	-3.30816
BCLAF1_S648	1.83093	-1.70643	5.27766	5.36e-05	0.00030883	1.56641
TRIM9_T90	1.82975	-0.627	7.10862	1.92e-06	1.78e-05	5.0088
WASHC2C_S539	1.82973	-0.785385	3.92876	0.00111074	0.00415945	-1.42717
SYNRG_T1100	1.8296	-1.15567	5.60104	4.23e-05	0.000252498	1.92609
MAP1B_S1346	1.82831	0.102857	3.313	0.00392955	0.012099	-2.7165
RTN4_S129	1.82567	-0.399692	6.01542	1.49e-05	0.000103626	2.92438
TOP2B_S1576	1.8254	-1.6133	5.62371	6.74e-05	0.000377803	1.61122
BRSK2_S566	1.82479	-0.165727	3.13622	0.00691694	0.0194032	-3.09482
PBRM1_S948	1.82416	-1.24907	4.82501	0.000141228	0.000716915	0.58932
GPRIN3_S583	1.82396	-0.667455	5.69266	4.56e-05	0.000269538	1.94927
ANK2_S2213	1.8235	0.159364	3.38615	0.00416071	0.0126924	-2.62688
TAB2_S527	1.82167	-1.18523	6.07155	1.33e-05	9.45e-05	3.03531
SUN2_S12	1.82127	-0.569214	4.94173	0.000109795	0.000577873	0.842859
HNRNPA1_S199	1.82091	-1.13079	5.70044	2.21e-05	0.000146086	2.46134
TCEAL5_S36	1.81847	-0.329214	4.13057	0.000645463	0.00262486	-0.933193
GORASP2_T222	1.81753	-0.924077	7.10484	1.93e-06	1.79e-05	5.00189
FTO_T4	1.815	-1.19575	3.85205	0.00144792	0.00519992	-1.6386
PLXDC2_S506	1.81473	-0.804214	5.3653	4.46e-05	0.000263628	1.75347
GPS1_T547	1.81302	-1.19071	4.81687	0.000143737	0.000728075	0.571594
TOP2B_S1461	1.81291	-0.936333	4.03756	0.000983064	0.00375386	-1.252
TRA2A_S236	1.8104	-1.28643	6.0865	1.01e-05	7.39e-05	3.2607
MYCBP2_S2812	1.80822	-1.34315	5.89712	1.87e-05	0.000127381	2.68924
ABCA1_S1145	1.80663	-1.15067	4.19295	0.000711764	0.002853	-0.928521
MAP1B_S1276	1.80576	-0.207643	3.88206	0.00111818	0.00418109	-1.47945
MAPT_Y532	1.80533	-0.602727	5.16393	0.000122127	0.000633023	0.92077
PALLD_S914	1.80287	-1.13979	4.05043	0.000770467	0.0030579	-1.10948
KIF13A_S1394	1.80234	-0.877167	7.74223	9.42e-07	9.79e-06	5.80283
FAM129B_S574	1.80204	-1.11686	6.41266	5.25e-06	4.23e-05	3.92147
CIC_S1405	1.8018	-1.197	7.97839	4.22e-07	4.93e-06	6.55011
PHF2_S705	1.80066	-1.05258	6.0183	1.92e-05	0.000129998	2.73045
PLEKHA4_S313	1.8006	-1.06175	5.99431	2.01e-05	0.000134656	2.68483
VPS50_S595	1.7985	-1.067	5.99965	2.62e-05	0.000168767	2.5136
RTN4_T116	1.79636	-1.082	6.19462	8.1e-06	6.12e-05	3.48126
PPP1R1C_S79	1.79536	0.286	3.41792	0.00390009	0.0120303	-2.53156
GIGYF2_S223	1.7938	-1.58108	5.77919	2.36e-05	0.000154376	2.45309
ACIN1_S863	1.79291	-0.980667	7.14028	2.58e-06	2.29e-05	4.77671
DLG5_S1666	1.79233	-1.28621	5.5581	2.97e-05	0.000187267	2.16219
MAP1B_S1917	1.79193	-0.998357	4.67243	0.000196628	0.000956583	0.256525
ZFYVE16_S939	1.79123	-0.848692	5.38521	5.2e-05	0.000301494	1.652
GTF3C1_T514	1.79043	-1.4833	2.84862	0.0130842	0.0331931	-3.60216
ARHGEF5_S983	1.79037	-0.483364	4.61896	0.000349402	0.00156031	-0.145651
DENND1B_Y602	1.78986	-0.983083	5.64072	3.92e-05	0.000236717	2.00354
SIN3A_S277	1.78669	-1.18779	5.9324	1.38e-05	9.72e-05	2.94379
PLEKHG2_S482	1.78614	-1.73964	5.46587	6.93e-05	0.000386579	1.52436
CLEC16A_S863	1.78393	-1.66021	8.12023	2.2e-07	2.86e-06	7.14643
MAP1A_S2182	1.7822	0.2985	5.54517	7.73e-05	0.000426127	1.47059
MRTFB_S77	1.78171	-0.966786	5.53443	3.13e-05	0.000195156	2.11223
PSMF1_S153	1.78024	-1.05464	5.66664	2.37e-05	0.000154939	2.39051
SMARCA4_T1455	1.77993	-1.46627	3.95759	0.00130425	0.00476289	-1.4724
PLEKHO2_T364	1.77835	-0.979769	7.00008	2.33e-06	2.11e-05	4.80916
PHF3_S1758	1.77764	-1.23873	6.545	1.01e-05	7.42e-05	3.48413
CRTC1_S167	1.7772	-0.968286	5.12501	7.41e-05	0.00041082	1.23884
WNK4_S1217	1.77719	-0.6607	3.74652	0.00223504	0.00754419	-1.86161
TAF15_S375	1.77392	-0.985846	3.91426	0.00114597	0.00427252	-1.45824
KANSL3_S515	1.7736	-1.2406	6.48118	1.58e-05	0.000110008	3.09095
KCNQ1_S27	1.773	-1.0068	4.53818	0.000486162	0.00206927	-0.383556
DAB2IP_S867	1.76937	-0.818333	8.69379	2.11e-07	2.76e-06	7.32589
KLC1_S418	1.76878	-0.683071	6.06362	1.05e-05	7.69e-05	3.21384
SASH1_S743	1.76725	-0.913538	5.42016	4.85e-05	0.000283649	1.72378
AGAP1_S339	1.76687	-0.727643	4.8995	0.000120247	0.000624889	0.751247
ARHGAP35_S1150	1.76617	-0.830667	6.81557	4.53e-06	3.73e-05	4.20241
KIAA1211_S975	1.76517	-0.7501	3.72516	0.00233058	0.00782606	-1.96193
LIMK2_S272	1.76351	-0.937286	6.36145	5.81e-06	4.62e-05	3.81863
ALB_T446	1.76315	-0.347615	6.21722	1.01e-05	7.39e-05	3.32129
AHNAK_S5830	1.76225	-1.21983	2.93713	0.00979772	0.0260592	-3.47722
SAMHD1_T592	1.76151	-1.242	4.6744	0.000195786	0.000953761	0.260836
SH3BP5L_T13	1.76102	-1.36129	5.76983	1.92e-05	0.000129974	2.60633
EIF4B_S450	1.76032	-1.05208	6.22332	9.94e-06	7.32e-05	3.33319
N4BP1_S300	1.7596	-1.22457	9.5444	2.08e-08	4.07e-07	9.53789
EVI2B_S263	1.75913	-0.4638	4.96199	0.000220747	0.00105546	0.57163
DOCK10_S1464	1.75769	-0.152917	8.23413	4.29e-07	4.99e-06	6.60494
TOR1AIP1_S79	1.75591	-1.44	4.13386	0.000640789	0.00260845	-0.925951
CEBPD_S191	1.75517	-1.4711	4.97286	0.000216386	0.00103855	0.438182
EPS8L2_S570	1.75449	-0.457286	4.65685	0.000203406	0.000984457	0.222478
PRUNE2_S1025	1.75431	-0.64375	5.73225	3.29e-05	0.000204122	2.18144
TEAD1_S102	1.75285	-1.06208	6.35296	7.76e-06	5.9e-05	3.58523
SLC41A3_S13	1.75013	-0.762286	5.18918	6.47e-05	0.000364464	1.3768
PHLDB1_S223	1.74998	-0.508786	6.12679	9.28e-06	6.88e-05	3.34305
RAB11FIP1_S435	1.74891	-0.6855	5.02973	9.09e-05	0.000490155	1.03334
PHC2_S704	1.74804	-0.585143	5.69484	2.24e-05	0.000147563	2.44962
C9orf78_S15	1.74673	-1.75236	4.54124	0.000407035	0.00177406	-0.30007
RFX3_S155	1.74633	-1.1683	4.68228	0.000370799	0.0016388	-0.108939
SYNE2_Y4111	1.74608	-1.5864	2.93065	0.0111402	0.0289984	-3.50761
DOCK7_S432	1.74589	-1.34827	5.66839	4.77e-05	0.000280045	1.90413
SYNM_S777	1.74556	-0.444143	3.70034	0.00167186	0.00588053	-1.87745
ARHGAP15_T213	1.745	-1.06785	6.46806	6.24e-06	4.91e-05	3.80711
RTN4_T172	1.745	-0.465917	6.43536	8.92e-06	6.65e-05	3.51135
DOK1_S269	1.74458	-1.06871	6.55147	4e-06	3.35e-05	4.19845
RTN3_S229	1.74411	-0.0882143	5.11268	7.61e-05	0.000420613	1.2123
DOCK7_S180	1.74213	-1.16014	6.66784	3.19e-06	2.75e-05	4.42868
MIER1_S250	1.74167	-1.331	5.4076	9.87e-05	0.000526367	1.23806
TBC1D9B_S411	1.74151	-1.46514	2.79249	0.0121471	0.031167	-3.80622
CEP131_S89	1.73962	-1.407	5.9177	2.32e-05	0.000151945	2.57277
PRRC2C_S929	1.73925	-1.1013	4.32477	0.000729219	0.00291601	-0.793745
SRPK2_S542	1.73917	-0.705462	8.27743	2.56e-07	3.24e-06	7.05633
WASHC2A_S539	1.73684	-0.817143	6.48184	4.58e-06	3.77e-05	4.05983
FAM122A_S309	1.73628	-0.983077	5.98401	1.58e-05	0.000109828	2.86213
HDGF_S225	1.73612	-1.34238	4.20592	0.000612584	0.00251241	-0.833295
NES_S905	1.73353	-1.34621	4.38144	0.000371466	0.00164103	-0.381394
NCOA1_S569	1.7335	-1.07064	4.28462	0.000676744	0.00273328	-0.783369
SPATS2L_S556	1.73285	-1.49677	6.22722	9.87e-06	7.27e-05	3.34081
RELL1_S153	1.7326	-0.1223	5.5497	7.67e-05	0.000423205	1.47874
PRAM1_S389	1.73228	-0.595615	5.00571	0.000113331	0.000593844	0.86428
PRR36_S1310	1.72962	-0.497385	5.00113	0.000114412	0.000598889	0.854681
NCK1_S85	1.7296	-1.46729	7.01854	1.63e-06	1.56e-05	5.11139
NPAT_S1303	1.72798	-1.47364	8.10896	2.24e-07	2.91e-06	7.12646
CBL_Y455	1.72693	-1.00057	6.4854	4.55e-06	3.75e-05	4.06692
WIPF2_S235	1.72676	-1.01386	7.76446	4.13e-07	4.83e-06	6.5074
EIF4EBP2_T70	1.72506	-0.840083	5.49165	5.23e-05	0.000302325	1.71156
SF3B1_T244	1.72409	-1.02092	5.90635	2.37e-05	0.000154567	2.51687
CSRP1_T82	1.72262	-0.636	4.5707	0.000245432	0.00115801	0.0339187
FNBP1_S359	1.72249	-0.839714	8.22403	1.84e-07	2.46e-06	7.32965
DMXL2_S929	1.72152	-0.853	8.66798	1.36e-07	1.91e-06	7.69974
USP19_S282	1.72151	-1.01742	4.62447	0.000293102	0.00134709	-0.0357176
SFPQ_T687	1.72118	-1.06655	4.89482	0.000204328	0.000987731	0.426455
PRRC2A_S166	1.72057	-0.893615	7.75269	6.19e-07	6.83e-06	6.16009
DCLK2_S361	1.72054	-1.03664	4.94578	0.000185225	0.000909567	0.525948
PLEKHO2_T232	1.71998	-1.00985	3.17573	0.00561352	0.0163121	-3.0239
PRAM1_S358	1.71942	-0.659143	5.7594	1.96e-05	0.000132128	2.58457
RLF_S1628	1.719	-1.2164	2.82822	0.0136173	0.0343366	-3.7026
SCYL2_S681	1.71871	-1.00629	7.34813	8.8e-07	9.2e-06	5.73765
KSR1_S174	1.71796	-1.152	7.86731	3.43e-07	4.15e-06	6.6939
USP8_S434	1.71689	-1.40371	4.11433	0.000669023	0.00270535	-0.968915
NES_S1571	1.7147	-1.24109	4.33082	0.000617266	0.00252955	-0.720466
SOX10_S24	1.71358	0.6256	4.61811	0.000418213	0.00181493	-0.23098
EPN2_S426	1.71295	-0.480923	5.97717	1.6e-05	0.000111153	2.84854
DOCK7_T1385	1.71171	-1.49927	6.50285	1.09e-05	7.9e-05	3.41059
ZNF609_S417	1.71157	-1.17442	7.40212	1.65e-06	1.58e-05	5.22916
LARP1_S963	1.71097	-1.17845	3.46791	0.00352274	0.0110224	-2.46231
MAP4_S863	1.70982	-0.783	4.15228	0.000687174	0.0027682	-0.948198
NEMF_S831	1.70891	-0.730786	6.60856	3.58e-06	3.05e-05	4.31162
CAMSAP2_T569	1.7083	-0.743462	6.76319	3.6e-06	3.06e-05	4.36778
DAXX_S666	1.70777	-1.52891	6.24091	1.71e-05	0.0001179	2.92317
GIT2_S381	1.70627	-1.19029	5.77792	1.89e-05	0.000128173	2.6232
PQLC1_S110	1.70588	-0.806	4.76488	0.000220418	0.00105514	0.289906
NCK1_Y105	1.70575	-0.730692	6.32542	8.18e-06	6.17e-05	3.53188
LARP1B_S90	1.7052	-1.14591	3.81146	0.00175266	0.00612732	-1.76799
LRRFIP2_T317	1.70457	-1.01473	5.70755	4.44e-05	0.000263085	1.97693
AHNAK_S1452	1.70455	-1.09915	4.84155	0.000159479	0.000798306	0.519317
GJA1_S330	1.70449	-0.359143	3.20678	0.00495955	0.0146987	-2.94323
MAP1B_T1788	1.70414	-0.721083	4.338	0.000527315	0.00221312	-0.627306
PRRC2B_Y1693	1.70408	-0.8432	4.35664	0.000686164	0.00276468	-0.732245
LRP1_S4520	1.70375	-1.25983	4.60381	0.000305708	0.00139707	-0.039981
KIF21B_S1167	1.70338	-0.372083	4.48004	0.00039374	0.00172481	-0.294775
UNC13B_S254	1.70187	-1.23286	6.55299	3.99e-06	3.34e-05	4.20147
BRD4_T1212	1.70163	-1.08342	6.71948	5.37e-06	4.31e-05	4.02965
MCF2L_S557	1.70089	-0.670583	5.82548	2.76e-05	0.000176274	2.36155
CDC42EP1_S303	1.70013	-0.634143	5.46031	3.65e-05	0.000222429	1.95536
ZMYND8_S502	1.69998	-1.14654	4.6276	0.00024992	0.0011765	0.0665678
PACS2_S331	1.6998	-0.692364	5.98175	2.71e-05	0.000173361	2.4554
LEMD2_S499	1.69922	-1.12808	7.47642	9.98e-07	1.02e-05	5.67322
EHBP1_S1035	1.69687	-1.13264	6.33471	6.13e-06	4.82e-05	3.7648
MBP_S112	1.6952	-0.549455	6.32415	1.48e-05	0.00010334	3.07143
SASH3_S97	1.6947	-0.950692	4.95007	0.000127203	0.000655627	0.747608
FCHO2_S403	1.69458	-1.42557	6.5673	3.88e-06	3.26e-05	4.22986
NASP_T477	1.69404	-1.48143	3.53133	0.00242928	0.00810215	-2.24551
EHBP1_S1058	1.69376	-0.613643	6.24588	7.31e-06	5.6e-05	3.5853
CHAMP1_S405	1.69338	-1.087	6.4029	5.35e-06	4.3e-05	3.90189
AQP4_S276	1.69324	-0.277714	2.81021	0.0116965	0.030166	-3.77015
COBL_T1020	1.69143	-0.721667	3.66897	0.00212444	0.00724244	-2.01983
NES_S548	1.69142	-1.44414	6.72899	2.83e-06	2.49e-05	4.54892
LSP1_S258	1.69053	-1.00757	6.00189	1.19e-05	8.58e-05	3.08706
CLASP2_S638	1.69015	-0.289692	6.87413	2.93e-06	2.56e-05	4.57545
TAPT1_S523	1.69013	-0.97725	4.42596	0.000439969	0.00189547	-0.406423
ARHGAP45_S598	1.69	-1.06	2.62645	0.0201725	0.0479074	-4.08118
SLC4A7_S251	1.68993	-1.36779	8.80548	6.86e-08	1.07e-06	8.32965
BTBD10_S115	1.68983	-1.0849	3.3968	0.00444582	0.0134019	-2.60483
SPP1_Y238	1.68943	-0.3485	4.13613	0.000800824	0.00315848	-1.04672
HECTD1_S1387	1.68803	-0.875545	5.77181	3.95e-05	0.000238466	2.06976
ANK2_S3909	1.68802	-0.958357	4.57736	0.000241889	0.00114299	0.04851
SPP1_T198	1.68764	0.0805455	3.70833	0.00216045	0.00734035	-1.94575
SYN1_S551	1.68753	0.719357	3.10008	0.00625942	0.0178722	-3.16901
KLF3_S111	1.6872	-0.861077	4.98819	0.000117523	0.00061342	0.827573
MTSS1L_S612	1.68702	-0.625714	7.30347	9.56e-07	9.89e-06	5.65366
GFAP_S433	1.68578	-0.545714	3.56193	0.00227052	0.00764988	-2.17906
PRIMPOL_S255	1.685	-1.03592	8.8364	1.7e-07	2.31e-06	7.54408
SIK3_S626	1.68287	-1.00864	3.37432	0.00343407	0.0107906	-2.58485
SYN1_S67	1.68142	-0.0117143	4.41554	0.000344676	0.00154503	-0.306469
ADAM17_S791	1.68122	-1.367	3.79685	0.00147577	0.00528676	-1.70956
TANC1_S465	1.68043	-0.68225	4.119	0.000829834	0.00325561	-1.08237
ITPRID2_S668	1.68036	-1.21143	5.33725	4.73e-05	0.000277936	1.69367
IL16_S885	1.67989	-1.13793	5.16678	6.78e-05	0.000379703	1.32868
ZYX_S281	1.67878	-1.31121	4.62712	0.000217014	0.00104107	0.157443
LIMA1_Y229	1.67793	-1.14807	3.84317	0.00121871	0.00449201	-1.56478
STX12_S142	1.677	-0.8067	5.91798	4.05e-05	0.000243771	2.1306
NELFB_S605	1.67689	-1.835	3.85215	0.00119473	0.00441413	-1.5451
ITPRID2_S593	1.6748	-1.02386	4.63145	0.000214978	0.00103253	0.166906
FAM129A_S602	1.674	-1.5767	2.92164	0.0113389	0.029417	-3.34045
TSC22D4_S263	1.6734	-0.3797	3.54828	0.00329871	0.0104391	-2.32677
NUP35_T48	1.6732	-0.7738	7.34961	4.05e-06	3.38e-05	4.48447
GFAP_S16	1.67092	-0.396462	4.00703	0.000938614	0.00361287	-1.25946
SEC63_S593	1.67022	-1.11771	6.3997	5.39e-06	4.33e-05	3.89547
ABL1_S737	1.6686	-1.24023	4.85862	0.000153895	0.000773426	0.555285
PSME3_S24	1.66762	-1.82764	5.23974	5.81e-05	0.000330975	1.48523
PPM1E_S548	1.66754	-0.562909	3.69249	0.00223106	0.00753708	-1.97776
ITPKB_S280	1.66728	-0.987615	2.68621	0.0157696	0.0388801	-4.01868
SASH1_S335	1.66643	-0.739692	7.03261	2.2e-06	2.01e-05	4.86917
SGIP1_S376	1.66593	-0.241357	3.07411	0.00662311	0.0187144	-3.22365
PHLDB1_S381	1.66592	-0.4098	3.21473	0.00636701	0.0181178	-2.95968
CTTNBP2NL_S568	1.6656	-1.351	3.53336	0.00282306	0.00917688	-2.30141
PHLDB1_S461	1.66265	-0.663769	5.67455	2.91e-05	0.000183908	2.24212
DOCK10_S1270	1.66153	-1.04993	6.43541	5.02e-06	4.08e-05	3.96702
SAFB_S604	1.66047	-0.836231	5.39678	5.08e-05	0.000295547	1.67577
SIPA1L1_S1632	1.66046	-0.867	6.77122	4.9e-06	3.99e-05	4.12284
CDK17_S146	1.6572	-1.02214	4.53363	0.000266133	0.0012427	-0.0473178
AJUBA_S263	1.656	-1.53908	5.12879	8.79e-05	0.000475503	1.12132
AREL1_T328	1.65594	-1.03317	5.65608	3.81e-05	0.00023068	2.03348
SRRM2_T1492	1.65584	-1.28607	6.31272	6.4e-06	5.02e-05	3.72045
MTMR10_S607	1.65538	-0.929583	4.23513	0.000652207	0.00264797	-0.80165
RTKN_Y450	1.65495	-0.457231	3.82658	0.00138419	0.00500852	-1.64596
SCARF2_S718	1.6548	-1.4938	3.23648	0.00609959	0.0174951	-2.93604
VWA5A_S634	1.65443	-0.485818	4.24358	0.000734487	0.00293416	-0.865751
TJP1_S1005	1.65387	-0.758	5.40441	4.1e-05	0.000246241	1.83668
AHNAK_S3412	1.65263	-0.328	5.19723	7.64e-05	0.000421605	1.26363
SMARCAD1_S79	1.6514	-1.22292	8.30844	3.81e-07	4.52e-06	6.72335
ABL2_S783	1.65138	-1.07992	6.34698	1.05e-05	7.65e-05	3.3805
S1PR3_S337	1.65027	-0.319286	5.09241	7.95e-05	0.000436704	1.16862
KLC2_S508	1.649	-1.3181	3.04168	0.00895516	0.0241625	-3.31336
ATP2B1_S1155	1.64836	-1.32486	6.11459	9.51e-06	7.03e-05	3.31813
FAM126B_S564	1.64753	-0.568929	6.3639	5.78e-06	4.6e-05	3.82356
SAP130_S709	1.64733	-1.685	5.21993	6.06e-05	0.000343914	1.44278
ERC1_S17	1.64654	-1.09755	4.46754	0.000470714	0.00201266	-0.417525
RASA3_S207	1.64551	-0.814083	6.12489	1.57e-05	0.000109504	2.93228
ATXN1L_S615	1.64508	-0.950154	7.17278	1.71e-06	1.62e-05	5.12606
NFATC3_S265	1.64493	-0.337636	7.16516	3.6e-06	3.06e-05	4.51522
CLASP2_S247	1.6449	-1.39085	4.57559	0.000278936	0.00129351	-0.0439664
STK10_S454	1.64458	-0.929	5.69198	5.98e-05	0.000340019	1.74805
TACC3_S558	1.64443	-0.97025	5.37118	6.6e-05	0.00037122	1.47364
KIAA1671_T1713	1.64403	-0.531545	5.50099	6.49e-05	0.000365649	1.56364
RFTN1_S450	1.64333	-0.915429	3.00459	0.00770089	0.0212534	-3.36919
PCM1_S93	1.64302	-1.34369	4.39722	0.000407219	0.00177447	-0.424131
DENND4C_S1110	1.64288	-1.1	8.64423	1.41e-07	1.97e-06	7.66117
AAK1_T674	1.64265	-1.20046	6.73122	3.82e-06	3.22e-05	4.30763
PNPLA2_S428	1.63975	-1.03992	4.21448	0.000680699	0.00274595	-0.844509
SF3B2_T780	1.63922	-1.03415	7.66833	7.15e-07	7.71e-06	6.01253
CRKL_Y207	1.63886	-0.814	3.34381	0.00419997	0.0127948	-2.69301
CEP170_S497	1.63862	-0.9969	4.81885	0.0002875	0.00132649	0.305741
EHBP1_S666	1.63825	-0.3507	3.78364	0.00207844	0.00710723	-1.84741
PHACTR4_S301	1.63775	-1.1064	5.06456	0.000182966	0.00089979	0.608849
NCBP1_T21	1.6367	-0.555545	4.14298	0.000898257	0.0034828	-1.09814
ARHGEF17_S461	1.63658	-0.9527	4.48497	0.000537625	0.00225123	-0.485456
ARHGEF17_S764	1.63531	-0.789071	6.28191	6.81e-06	5.27e-05	3.65823
ALB_S294	1.63494	-0.196917	5.77501	3.03e-05	0.000190288	2.26419
SLC20A2_S351	1.634	-0.6474	3.95499	0.00148791	0.00531876	-1.51227
DIS3L2_S139	1.63229	-0.849167	6.36271	1.02e-05	7.46e-05	3.37701
TNS3_Y333	1.63223	-0.609846	4.58882	0.000271244	0.00126305	-0.0158307
ATL1_S10	1.63003	-0.305692	5.99235	1.55e-05	0.000108169	2.87865
RBBP6_S1328	1.62982	-1.10714	5.94207	1.35e-05	9.55e-05	2.96376
CEP170_S968	1.62886	-0.896167	4.68187	0.000260806	0.0012198	0.0821371
APC_S2106	1.6288	-0.954333	6.62451	6.35e-06	4.99e-05	3.85765
PPM1E_Y542	1.6275	-0.554	4.81054	0.000291965	0.0013434	0.133706
KIAA1211_T1202	1.6274	-1.13208	6.04872	1.39e-05	9.82e-05	2.99024
RTN4_S107	1.62658	-0.907857	3.86779	0.00115406	0.00429932	-1.51077
JPT1_S17	1.62596	-1.37045	4.6043	0.000359595	0.00159593	-0.145619
CCAR2_S675	1.62509	-1.34817	3.70295	0.00197842	0.00680911	-1.94914
PHF3_S283	1.62447	-0.794077	8.63332	1.44e-07	2e-06	7.64344
VAPB_S158	1.62433	-1.14038	5.17423	8.01e-05	0.000439453	1.21587
MAP2_S725	1.6232	0.0468182	5.87138	3.3e-05	0.000204499	2.2534
HDAC4_S210	1.62312	-1.03983	4.40763	0.000456861	0.00196321	-0.444296
KIAA1109_S2249	1.62275	-0.499909	3.18481	0.00626692	0.017891	-2.99821
MAP4K4_S600	1.6225	-1.14092	5.9474	2.19e-05	0.000144882	2.62946
MAP4K4_S818	1.621	-0.641182	5.24102	0.00010556	0.000559381	1.06903
GORASP2_T433	1.62042	-0.7935	3.21753	0.00484426	0.0144155	-2.92036
SNX5_S193	1.61908	-0.878154	4.72255	0.000204637	0.00098875	0.267904
HOMER3_S159	1.61687	-1.35921	6.83317	2.32e-06	2.1e-05	4.7526
CLASP1_T711	1.6166	-0.556231	5.05445	0.000102458	0.000544372	0.966228
MPRIP_T542	1.6156	-0.949	4.48172	0.00029814	0.00136713	-0.161175
GEMIN5_S757	1.61531	-1.00821	5.33462	4.75e-05	0.000279235	1.68807
SH2B1_S126	1.615	-1.06321	5.73209	2.07e-05	0.000138481	2.52753
ITPRID2_S704	1.615	-1.3255	3.67506	0.00257116	0.0084855	-1.88524
MPZL1_S221	1.61482	-1.12354	5.71736	2.67e-05	0.000171274	2.32859
TRIM24_S687	1.61314	-0.703	4.88381	0.000173426	0.000857056	0.494619
EFS_S298	1.61291	-0.211071	8.07456	2.38e-07	3.05e-06	7.06536
ZNF462_S688	1.61156	-0.891	3.28773	0.00415361	0.0126746	-2.77059
AKAP12_S1497	1.611	-0.283182	3.77591	0.00188362	0.0065319	-1.80914
EVL_S333	1.6108	-1.02371	5.02064	9.27e-05	0.000499269	1.01368
EIF4EBP2_S65	1.60989	-0.6725	5.37059	6.61e-05	0.000371335	1.47248
DTNB_T529	1.60595	-0.506077	5.545	3.77e-05	0.000228725	1.9791
KIAA0556_S97	1.60566	-0.914833	5.46581	5.49e-05	0.000315492	1.66067
RBM14_S618	1.60413	-1.13243	5.1079	7.69e-05	0.000423885	1.20199
KCTD3_T662	1.60349	-1.23717	3.18314	0.00587658	0.0169486	-3.02219
MEPCE_S152	1.60242	-1.01331	5.38524	5.2e-05	0.000301494	1.65207
MAP1B_S1298	1.6024	-0.848714	3.80048	0.00133949	0.0048704	-1.65835
CLCN6_S683	1.60158	-0.405786	6.54663	4.04e-06	3.37e-05	4.18883
LMNB1_S23	1.60088	-0.90775	5.24112	8.52e-05	0.000463345	1.25126
SOGA3_S766	1.59845	-0.775462	4.82853	0.000163878	0.000816677	0.491863
SMARCA4_S1382	1.59694	-1.27975	5.42664	5.93e-05	0.000336966	1.58339
SCD_S198	1.59583	-0.5575	5.34121	7e-05	0.000389903	1.41418
NES_S1590	1.5958	-1.04907	3.48039	0.00271837	0.0088956	-2.35591
MAPKAPK3_T201	1.59575	-1.5036	3.34162	0.00495695	0.0146949	-2.53325
EVI2B_S268	1.59557	-0.873692	5.03373	0.000106944	0.000566011	0.92291
SENP1_S157	1.59475	-0.900385	6.49559	5.92e-06	4.69e-05	3.85991
TOM1_T164	1.59387	-0.455846	3.84145	0.00134052	0.00487327	-1.61413
MARCKS_S163	1.5936	-0.7164	2.60438	0.0210529	0.0496415	-4.14127
UBA5_S45	1.59227	-0.664	3.45008	0.00290629	0.00939916	-2.42147
SOAT1_S16	1.592	-0.904667	4.71822	0.000242262	0.00114441	0.156634
MAGED4_S167	1.59085	-0.502385	3.9622	0.00103362	0.00391943	-1.35553
WASHC2C_S704	1.58971	-0.738636	6.22063	1.77e-05	0.000121542	2.91185
SSH3_S649	1.589	-0.984846	3.01669	0.00787676	0.0216764	-3.35267
SPTBN1_S2358	1.5886	-0.506	2.71809	0.0147589	0.0367795	-3.95564
PHLDB1_S220	1.5866	0.0421818	5.2435	0.000105068	0.000557065	1.07378
PAPOLA_T719	1.5864	-0.936	4.03647	0.00098529	0.00376022	-1.25426
GJA1_S255	1.58596	0.0678571	3.37234	0.00344902	0.0108244	-2.58909
PPP1R12B_S421	1.58462	-0.622667	3.91798	0.00126155	0.00462957	-1.46124
SCHIP1_S330	1.58451	-0.674214	5.07393	8.27e-05	0.000451953	1.12877
KMT2A_S2199	1.5842	-0.975909	5.0897	0.000140629	0.000714594	0.777375
AKAP12_S1587	1.58402	-0.4855	4.73124	0.00017304	0.000855355	0.384965
PXN_S336	1.58376	-1.14493	6.71423	2.91e-06	2.55e-05	4.51994
BAG3_S385	1.5834	-0.257273	4.26737	0.000700419	0.00281311	-0.847816
IFT140_S1443	1.58129	-1.41614	5.72985	2.08e-05	0.000138936	2.52286
SYNRG_S852	1.58047	-0.817214	6.70447	2.97e-06	2.59e-05	4.50076
KNG1_S275	1.58029	-0.4015	4.75352	0.000164876	0.000820838	0.43356
BIN2_S490	1.57987	-1.389	3.08653	0.00718703	0.0200327	-3.17684
DNAJB1_S151	1.57893	-1.42943	4.35664	0.000392267	0.00171898	-0.435912
CTTNBP2NL_S488	1.5783	-1.12646	6.45319	6.42e-06	5.03e-05	3.77854
CLU_S396	1.57773	-0.539857	4.04218	0.000784653	0.0031026	-1.12763
CLASP1_S588	1.57695	-0.974231	4.33248	0.000467443	0.00200142	-0.562474
RSF1_T1305	1.574	-1.42086	3.3379	0.00372037	0.0115306	-2.6631
FMNL1_S184	1.57389	-0.859786	4.41985	0.000341433	0.00153596	-0.297004
MYLK_S1773	1.57337	-0.4527	4.03862	0.00126494	0.00463951	-1.1796
NEBL_S953	1.57327	0.0452143	2.5568	0.0199682	0.0475174	-4.27695
MTSS1L_S373	1.57262	0.0194	3.70774	0.00241154	0.00805365	-1.82168
PCBP1_S231	1.57238	-0.773615	4.97249	0.000121415	0.000629823	0.794649
ANK1_S875	1.57213	-0.923857	2.66178	0.0160251	0.0394473	-4.06946
FAM122A_S79	1.57165	-1.15877	5.50516	4.08e-05	0.000245256	1.89782
IWS1_S27	1.56994	-0.927	6.03505	1.86e-05	0.000126637	2.76228
SURF2_T195	1.5682	-0.8689	4.95401	0.000224007	0.0010698	0.386506
CASKIN2_S471	1.56742	-0.885429	7.45507	7.23e-07	7.76e-06	5.93765
JPT1_S88	1.56716	-1.02386	5.15691	6.93e-05	0.000386474	1.30748
STARD13_S389	1.56652	-0.821615	4.67756	0.000224947	0.00107376	0.172567
CHAMP1_S603	1.5656	-0.913846	4.67787	0.000224801	0.00107331	0.173225
USP24_S1925	1.56537	-1.7543	3.6118	0.0029113	0.00940933	-2.0083
TUT1_S682	1.56525	-1.009	6.33927	1.06e-05	7.75e-05	3.36622
SRRT_S136	1.56402	-0.921643	4.62144	0.000219716	0.00105203	0.145015
REPS1_S562	1.56278	-1.11064	3.40664	0.00319821	0.0101719	-2.51523
ITPRID2_S352	1.56262	-1.005	6.28127	1.18e-05	8.49e-05	3.25849
TSC22D4_S264	1.56234	-0.466167	4.94465	0.000153501	0.000772017	0.618157
VIM_S205	1.56178	-0.911	4.85002	0.000133796	0.000684707	0.643734
SAMSN1_S104	1.56158	-1.0147	3.07636	0.00836398	0.0228024	-3.22767
REEP3_T201	1.56064	-0.842636	5.57556	5.66e-05	0.000323764	1.73071
CAMSAP2_S1313	1.56038	-1.0605	7.3775	8.33e-07	8.78e-06	5.79274
AQP4_T289	1.56022	-0.61	4.35365	0.000394846	0.0017284	-0.442465
ZNF655_S80	1.56008	-0.9883	4.34232	0.000705172	0.00282939	-0.759862
TACC2_S2086	1.55986	-0.852917	4.06742	0.000923797	0.00356127	-1.18978
GLE1_S88	1.55905	-0.730615	4.39241	0.000411404	0.00179	-0.434392
MCM3AP_T423	1.55863	-0.370364	5.63494	5.07e-05	0.000295065	1.81517
SPECC1_T58	1.55808	-1.0616	4.44439	0.000580627	0.00240072	-0.563339
WARS_T453	1.55804	-0.526	5.6561	2.43e-05	0.000157748	2.36838
MRVI1_S347	1.55779	-0.453818	4.39878	0.000539339	0.00225701	-0.554775
REEP4_S152	1.55649	-1.19275	6.85866	4.2e-06	3.49e-05	4.27946
TRIO_S2459	1.5563	-0.615923	4.80634	0.000171665	0.000849808	0.445035
PELP1_S1093	1.55591	-1.12743	8.80292	6.89e-08	1.07e-06	8.32533
RPS6KA4_S737	1.55575	-1.20367	5.15872	0.000100246	0.000533606	1.0866
MTSS1_S276	1.55542	-0.457714	3.74227	0.00152371	0.0054334	-1.78579
SNX1_S188	1.5552	-0.553571	4.69445	0.000187437	0.00091886	0.30463
KIF5A_S930	1.55471	-0.631364	3.86114	0.00158493	0.00561789	-1.63683
WASL_Y256	1.55462	-0.165917	3.1559	0.00622018	0.0177878	-3.03614
TOM1_S160	1.5536	0.248857	3.30908	0.00396347	0.0121885	-2.72489
SMARCA2_S588	1.5523	-1.18246	5.87456	1.96e-05	0.000132041	2.6442
PRICKLE2_S571	1.55225	-0.519583	4.73329	0.000234973	0.00111607	0.225371
RASA3_S809	1.55184	-0.883214	7.69717	4.66e-07	5.37e-06	6.3846
PPP1R18_S224	1.55104	-0.9075	6.8227	2.37e-06	2.13e-05	4.73222
SF3B1_T142	1.55096	-1.01664	6.0894	1e-05	7.36e-05	3.26663
CAMSAP2_S862	1.55076	-0.625714	5.54431	3.06e-05	0.000191773	2.13307
TNKS1BP1_S983	1.54983	-1.13554	7.121	1.87e-06	1.75e-05	5.03148
CAMSAP1_S575	1.54893	-0.393273	4.17549	0.000841604	0.0032882	-1.03264
HNRNPA2B1_S318	1.54813	-0.975429	4.24061	0.000506361	0.00213511	-0.691073
TP53BP2_S486	1.54792	-1.013	5.38986	0.000101813	0.00054123	1.2059
CEP55_S428	1.54767	-0.4041	4.71537	0.000348558	0.00155689	-0.0461757
USP47_S1025	1.54638	-0.563615	6.86735	2.97e-06	2.59e-05	4.56281
SPP1_S283	1.545	0.07075	5.23347	8.65e-05	0.000469155	1.1996
TBC1D4_S588	1.545	-0.760182	5.1775	0.000119025	0.00062012	0.974712
CKAP5_S1801	1.54455	-0.665692	4.91658	0.000136378	0.000695802	0.677268
AHNAK2_S842	1.54402	-0.499786	2.69554	0.0149229	0.0371194	-4.00195
MTMR3_S613	1.544	-1.2458	3.78675	0.00206581	0.00707126	-1.783
MYT1_S91	1.54075	0.0633333	4.13619	0.00080073	0.00315848	-1.00717
ZEB1_S572	1.54062	-1.16208	4.74955	0.00019336	0.000943306	0.325036
ZBTB21_S345	1.54027	-1.20157	5.14255	7.14e-05	0.000397053	1.27659
SZT2_S1168	1.54006	-1.10417	4.72071	0.00024104	0.00114005	0.161743
C2CD5_S314	1.53982	-1.37464	5.95631	2.83e-05	0.000180568	2.43471
SOS2_S1047	1.53956	-0.780714	5.18876	6.47e-05	0.000364689	1.37589
RBMX2_S314	1.53949	-1.56983	5.50198	5.12e-05	0.000297535	1.73188
REPS1_S143	1.53918	-0.971071	4.87019	0.000128095	0.000659548	0.687581
HNRNPC_S162	1.53892	-0.7706	4.34951	0.000695558	0.00279694	-0.745988
SCYL1_S754	1.53865	-0.654462	4.21721	0.000597956	0.00246204	-0.809111
NAV1_S142	1.53807	-0.865357	3.69151	0.00170486	0.00598369	-1.89674
UBL4A_S90	1.53724	-1.13343	5.09953	7.83e-05	0.00043082	1.18396
SYTL4_S221	1.53418	-0.623857	4.81809	0.000143358	0.000726448	0.574254
EPS15L1_S672	1.53373	-0.979571	5.1268	7.39e-05	0.000409596	1.24269
RTN4_S111	1.5332	-0.396167	5.1935	9.36e-05	0.000503029	1.11967
SYNM_S1044	1.53258	-0.749429	3.64445	0.00189193	0.00655621	-1.99944
JPT1_S87	1.53249	-0.717571	5.95644	1.31e-05	9.31e-05	2.99343
SYMPK_S494	1.53238	-0.8735	5.06375	8.45e-05	0.00046018	1.1068
SRRM2_T2738	1.53062	-1.44442	5.15251	0.000101486	0.000539777	1.07415
BIN1_T348	1.5303	0.205077	4.79604	0.000175407	0.000865358	0.423285
TBC1D16_S384	1.52943	-0.730385	6.13629	1.18e-05	8.46e-05	3.16275
DENND1B_S654	1.5292	-0.6684	3.3691	0.00469547	0.0140453	-2.67744
IKZF1_S63	1.52916	-1.01143	4.01669	0.000830133	0.00325561	-1.18367
TACC3_S402	1.52914	-1.05509	4.68683	0.000305956	0.00139789	0.0176974
RXRA_S260	1.52887	-0.543643	6.18256	8.3e-06	6.25e-05	3.45672
TRAF7_S61	1.52864	-1.02527	4.51484	0.000428764	0.00185552	-0.323317
AHNAK_S177	1.52697	-0.485077	7.13314	1.83e-06	1.72e-05	5.05368
FEZ2_S205	1.5264	-1.015	5.06465	0.000120807	0.000627313	0.860797
SETX_S1366	1.52471	-1.02457	6.07815	1.02e-05	7.5e-05	3.2436
SLC47A2_T516	1.52457	0.0396667	3.57605	0.00258134	0.00851632	-2.21287
GEMIN2_S81	1.52427	-0.896818	3.40568	0.00399855	0.0122739	-2.58761
ATRX_S84	1.52404	-1.02814	3.58782	0.00214427	0.00729769	-2.12277
TLE3_T259	1.5218	-0.8899	3.78589	0.00206928	0.00708192	-1.86103
MARCKS_S145	1.52116	-0.462286	3.78724	0.00137933	0.00499275	-1.68736
KHSRP_T100	1.52062	-1.10314	6.67898	3.12e-06	2.71e-05	4.45061
HCFC1_S666	1.5206	-1.03015	5.74712	2.52e-05	0.000162951	2.38859
ARHGEF17_S930	1.52	-1.05838	4.23881	0.000570955	0.00236866	-0.762865
CCDC9_S362	1.51967	-1.06693	6.47907	4.61e-06	3.79e-05	4.0543
EIF3C_T263	1.51907	-0.738615	5.63496	3.15e-05	0.00019633	2.16195
MAP2_S498	1.51902	-0.371714	3.87191	0.00114358	0.004265	-1.50173
CCDC88A_S1651	1.51875	-0.861615	4.47658	0.00034402	0.00154312	-0.254795
CNPY4_S58	1.5184	-1.20771	5.7997	1.8e-05	0.000123521	2.66857
SRRM2_S1219	1.51758	-1.38579	6.2875	6.73e-06	5.22e-05	3.66954
CDC42EP4_S140	1.51682	-0.4565	3.02028	0.00744362	0.0206366	-3.33643
ZNF768_S139	1.51649	-1.29242	4.40037	0.000463736	0.00198733	-0.498075
44078_S122	1.51587	0.937714	2.53982	0.0206866	0.0489495	-4.31015
CSTF2_S538	1.51517	-1.27645	3.1178	0.00718041	0.0200187	-3.16327
HCN2_S754	1.51463	0.2565	3.84548	0.00146796	0.00526344	-1.61217
SLC20A2_S316	1.51438	-1.12933	5.03179	0.000128976	0.000663409	0.831502
AKAP12_S514	1.51417	-0.224909	3.6947	0.00222107	0.00750961	-2.00424
GCFC2_S174	1.5139	-0.831231	4.57819	0.000277407	0.00128788	-0.0384364
SORBS1_S86	1.51304	-0.602091	5.27595	9.88e-05	0.00052709	1.1635
TP53BP2_S564	1.51263	-0.563846	5.74575	2.52e-05	0.00016329	2.38583
SIPA1L1_T1190	1.5125	-1.07677	4.63935	0.000243803	0.00115123	0.0915118
WIPF2_S385	1.512	-1.1917	4.65472	0.000390439	0.00171209	-0.161295
AHNAK_S2580	1.51156	-0.756714	4.6912	0.000188763	0.000925137	0.297543
FOXK1_T436	1.51036	-1.66314	4.26264	0.000482372	0.00205444	-0.642604
LIMD1_S316	1.50942	-1.25414	5.5493	3.03e-05	0.000190024	2.14361
RAPGEF1_S353	1.50884	-0.907571	4.20155	0.00055189	0.00230331	-0.777014
HMGXB4_S480	1.50713	-1.0215	4.14785	0.000781577	0.00309468	-0.982932
ZDHHC5_S432	1.50667	-0.624571	7.60407	5.51e-07	6.18e-06	6.21367
GAS7_S152	1.50664	-0.965357	4.08968	0.000706464	0.00283401	-1.02315
HSPB8_T87	1.50653	-0.114286	4.10481	0.000683237	0.00275344	-0.989857
TMEM230_T88	1.50593	-1.1535	5.65253	2.44e-05	0.000158817	2.36089
HBD_S51	1.50536	-0.777929	3.94572	0.000971239	0.00371574	-1.33966
MARK1_S650	1.50535	-0.229769	5.0802	9.71e-05	0.000520008	1.02002
MICALL1_S644	1.50509	-0.597357	4.36601	0.000384268	0.00168723	-0.415299
GAB1_S418	1.50498	-0.851286	7.30436	9.54e-07	9.88e-06	5.65533
REPS1_S482	1.50489	-0.647429	5.29133	5.21e-05	0.000301582	1.59562
DENND4C_S1233	1.50482	-1.04779	5.63403	2.54e-05	0.000164124	2.32205
IRS2_S1148	1.50313	-1.12909	4.5549	0.000396236	0.00173298	-0.272883
C9orf40_S76	1.50231	-0.622571	4.75396	0.000164718	0.000820398	0.434525
MAP1S_S610	1.5023	-0.977692	4.80256	0.000173028	0.000855355	0.43706
GAB1_S206	1.50217	-0.8868	6.13962	2.79e-05	0.000177784	2.52835
DOCK8_S904	1.50204	-0.691	4.94245	0.000109625	0.000577126	0.844427
MAP2K4_S268	1.50189	-0.3575	3.79994	0.0013411	0.0048745	-1.65954
TFEB_S346	1.5015	-0.782	4.62502	0.00034528	0.00154739	-0.13364
DCK_S74	1.50011	-1.09036	4.31291	0.000431851	0.00186713	-0.532051
SRRM2_S1014	1.49956	-1.382	4.82311	0.000141809	0.000719502	0.585188
TOP2A_S1332	1.49829	-1.226	3.83628	0.00149649	0.00534769	-1.67148
MAP1B_Y2059	1.49825	-0.1851	3.16231	0.00706063	0.0197322	-2.87987
CHD1L_S888	1.498	-1.10409	4.62618	0.00034449	0.00154454	-0.131324
EIF4G3_S303	1.49747	-0.517923	3.77276	0.00155442	0.00551946	-1.76107
NFATC1_S269	1.49697	-0.970615	5.3412	5.69e-05	0.000325343	1.56141
TRIM22_S384	1.49593	-0.854455	5.84877	3.44e-05	0.000211642	2.23783
TOP2B_S1550	1.49591	-1.01686	4.51123	0.000279496	0.00129548	-0.0964434
PPP1R12A_S507	1.49556	-0.885429	5.067	8.39e-05	0.000457585	1.11382
CIT_S2013	1.49531	-0.483667	4.21651	0.000677842	0.00273717	-0.87953
EHBP1_S664	1.49453	-0.253571	5.26497	5.51e-05	0.000316063	1.53927
ITPKB_S269	1.49342	-0.808857	4.58978	0.000235419	0.00111792	0.0757173
ARHGAP25_S495	1.49335	-1.19538	6.4765	6.14e-06	4.83e-05	3.82331
STIP1_S63	1.49209	-0.734583	5.11827	0.000108606	0.000572805	0.968732
SH3BP5L_S30	1.49209	-1.22058	4.54	0.000348247	0.00155688	-0.209604
CCDC86_S69	1.4916	-1.149	4.66631	0.000318469	0.00144718	-0.0518283
NES_S471	1.4912	-1.75943	4.17033	0.000591228	0.00243951	-0.845697
SRCAP_S2869	1.49071	-1.32064	5.76102	4.03e-05	0.000242603	2.07604
MYCBP2_S3426	1.49008	-0.729769	5.14452	8.51e-05	0.000462962	1.15408
PAK2_S141	1.4889	-0.833846	3.92034	0.00113107	0.00422459	-1.44522
ABLIM1_T349	1.48775	-0.482	5.7268	4.29e-05	0.000255364	2.01265
SLC16A1_T466	1.48729	-0.908714	6.7484	2.73e-06	2.41e-05	4.58697
MAPRE1_S155	1.48708	-0.691	3.59265	0.00302297	0.009708	-2.22154
MAP3K5_S1029	1.48663	-0.919846	3.52963	0.00262535	0.0086406	-2.27925
ITGA4_S1021	1.486	-1.36629	5.01843	9.31e-05	0.000500969	1.0089
EPS15_S790	1.4859	-0.829	5.76939	2.41e-05	0.000156823	2.4334
FGA_Y589	1.48533	-0.531857	2.69318	0.0149977	0.0372733	-4.00669
FOXO3_T32	1.48527	-0.744214	4.99363	9.82e-05	0.000524423	0.955263
NCF2_T233	1.48457	-1.05836	5.57442	5.67e-05	0.000324294	1.7018
PRUNE2_S693	1.4844	-0.583273	3.59465	0.00272187	0.00890562	-2.20651
DOCK7_S1383	1.48409	-1.23786	5.78813	1.85e-05	0.000125936	2.64448
MTOR_S2478	1.48369	-0.787	4.58639	0.00023717	0.00112507	0.0682796
PRKAG2_S65	1.48269	-0.3135	4.82093	0.000196831	0.000957229	0.366553
CDC42EP1_S350	1.48198	-0.4135	2.64337	0.016658	0.0407564	-4.10609
BAG4_S179	1.48175	-0.997833	3.98726	0.00109171	0.00409961	-1.31701
ITPRID2_S641	1.48156	-1.09143	5.73233	2.07e-05	0.000138458	2.52803
CHMP7_S417	1.47989	-0.607357	6.58639	3.74e-06	3.16e-05	4.26772
MRVI1_S697	1.47943	-0.091	3.44512	0.00339681	0.0106876	-2.48408
SPN_S368	1.4794	-0.4873	6.03437	3.33e-05	0.000205743	2.33272
WDR44_T163	1.47925	-0.7138	4.36065	0.000680929	0.00274633	-0.724503
GIT1_S419	1.479	-0.4321	6.67078	1.17e-05	8.4e-05	3.4042
WDR20_T389	1.4786	-1.09293	4.02782	0.000809965	0.00318705	-1.15921
CALD1_S759	1.47793	-1.0805	5.68144	2.3e-05	0.0001511	2.42153
LIMD1_S423	1.47717	-0.689083	4.85361	0.000184289	0.000905412	0.433148
SLAIN2_S353	1.4768	-1.5216	3.18072	0.00680877	0.0191541	-3.0444
SNX14_S508	1.47643	-1.11525	6.0408	1.84e-05	0.000125543	2.77319
CHAMP1_S355	1.47598	-0.822692	4.47884	0.000342374	0.00153847	-0.249975
UBAP2L_S416	1.4755	-0.759167	5.04398	0.000125881	0.000649146	0.85608
CDC42EP1_T367	1.47487	-0.274	5.61195	4.14e-05	0.000247922	1.98261
MID1_S96	1.47424	-0.852929	4.66184	0.000201211	0.000975942	0.233378
F11R_S287	1.47407	-0.778214	5.07154	8.31e-05	0.000454025	1.12361
ARL2BP_S141	1.47382	-0.684636	3.00917	0.00894832	0.0241473	-3.34601
PACS1_S411	1.47343	-0.778636	4.64181	0.000334105	0.00150619	-0.0713038
DENND4C_S1662	1.47324	-1.20529	7.09067	1.42e-06	1.39e-05	5.24972
TBC1D1_S614	1.473	-0.8915	3.51027	0.00296314	0.00954928	-2.30842
DGKZ_S193	1.47251	-0.727167	3.64125	0.00225155	0.00759229	-2.07746
NASP_S210	1.47217	-1.2613	2.78207	0.014903	0.0370745	-3.78989
PRRC2A_S761	1.47136	-0.886071	4.0438	0.000781843	0.00309513	-1.12406
GSN_S35	1.47077	-0.23275	3.67748	0.00208685	0.00713121	-2.00212
TNS3_S660	1.47022	-0.394143	4.73257	0.00017254	0.000853514	0.387871
SYNJ1_S1088	1.4702	-0.755538	4.96672	0.00012288	0.000635945	0.782539
RTN4_S121	1.4698	-0.410692	4.95616	0.000125604	0.000648048	0.760387
PWP1_T86	1.46873	-0.838231	5.92588	1.77e-05	0.000121336	2.74657
SIPA1L1_S1508	1.46863	-1.01827	3.72078	0.00210653	0.00718866	-1.95148
DDR2_S461	1.46843	-1.04185	4.34336	0.000456722	0.00196303	-0.539211
RHBDF1_S76	1.46838	-1.05636	4.25611	0.000489362	0.00207675	-0.656973
ARHGEF6_S640	1.46827	-0.848286	6.73994	2.77e-06	2.45e-05	4.5704
SOCS6_S70	1.468	-0.407	4.52559	0.000497861	0.00210594	-0.424739
PTPN11_Y546	1.46675	0.0333846	2.74163	0.0140528	0.0352816	-3.90891
CLASP2_S798	1.46607	0.270929	3.81131	0.00130777	0.00477485	-1.63463
ARHGEF18_S1124	1.46595	-0.760923	5.30587	6.12e-05	0.000346854	1.48853
DHX29_T72	1.4635	-1.03827	5.06328	0.000147895	0.000746623	0.726184
KIAA1109_S2247	1.4634	-0.511154	5.68381	2.86e-05	0.000181361	2.26085
ESF1_S657	1.46337	-1.01183	4.79542	0.000207227	0.000999348	0.314507
ZNF219_S114	1.46223	-1.17918	3.2177	0.00586167	0.0169152	-2.9644
FNBP1_S296	1.46187	-0.423571	4.91648	0.000115928	0.000606035	0.7881
ABI1_S225	1.46162	-0.796167	5.01257	0.000134015	0.000685478	0.792731
KMT2E_S845	1.46108	-1.2164	4.87458	0.000259316	0.00121396	0.254186
ARHGAP23_S1412	1.46022	-0.507714	4.66451	0.000200045	0.00097075	0.239219
MAP1B_T1236	1.45915	-0.412538	3.81832	0.00140903	0.00508381	-1.66363
INPP5F_S827	1.45887	-0.0737692	4.53512	0.000303872	0.00138962	-0.130076
ANO6_S277	1.4545	-0.570077	4.12662	0.00072603	0.00290498	-1.00316
LRCH3_S415	1.45417	-1.15508	4.82377	0.00016552	0.000823838	0.481809
SPATA13_S316	1.454	-0.745273	3.83236	0.00168001	0.00590612	-1.69501
S100A11_S5	1.45393	-0.803071	5.0495	8.71e-05	0.000472242	1.07603
HBB_T51	1.45364	-0.790286	3.90324	0.00106697	0.0040232	-1.43296
ZFP36L2_S125	1.45355	-1.29869	4.6941	0.000217251	0.00104174	0.207633
VAV2_S663	1.45307	-1.09018	4.27116	0.000695155	0.00279647	-0.810382
IRS2_S306	1.45297	-0.749538	4.55032	0.000294251	0.00135176	-0.097725
ZBTB1_S305	1.45263	-0.9046	4.46685	0.000556408	0.00231881	-0.357654
TJP2_S297	1.45242	-0.6625	3.57948	0.00218418	0.0074085	-2.14092
AHNAK_S1068	1.45222	-0.914571	2.67214	0.0156789	0.0387133	-4.04878
STIM1_S681	1.45164	-0.361	4.92996	0.000112612	0.000590692	0.817337
PRAM1_S298	1.45156	-0.493143	4.46252	0.000310947	0.00141747	-0.20332
ARHGAP4_S946	1.45142	-1.07338	5.21204	7.41e-05	0.000410582	1.29436
AQP4_Y277	1.45131	-0.265786	2.84304	0.0109039	0.0285159	-3.70311
N4BP1_T242	1.451	-0.863786	4.88832	0.000123183	0.000637188	0.726953
SORBS3_S348	1.44933	-0.3441	5.41336	9.76e-05	0.000522112	1.2485
MCM3_S205	1.4492	-1.25643	4.09303	0.000701245	0.00281531	-1.01577
SPP1_S267	1.44913	0.118214	4.52987	0.000268333	0.0012521	-0.0555724
CEP170_S466	1.44849	-0.946571	5.08599	8.06e-05	0.000441897	1.15476
MEN1_S492	1.44748	-0.453154	4.25479	0.000551777	0.00230331	-0.728659
EVI5_S705	1.44709	-0.756071	7.11089	1.37e-06	1.35e-05	5.28838
PPFIBP2_S329	1.44709	-0.913333	4.49626	0.000380868	0.00167559	-0.29985
PSEN1_S43	1.44644	-1.30086	4.55136	0.000256022	0.00120049	-0.00846686
SCRIB_S504	1.44549	-0.723643	5.01732	9.33e-05	0.000502031	1.0065
MAP1B_S1427	1.44487	-0.846643	2.92084	0.00922694	0.0247929	-3.54311
TSC22D4_S203	1.44463	-0.7815	4.37398	0.000489624	0.00207699	-0.552728
PDZD2_S1270	1.444	-0.617667	3.1509	0.00628536	0.017931	-3.0463
FYB1_S683	1.44349	-0.405357	3.46974	0.002783	0.00907029	-2.37896
MAP3K4_S1252	1.44317	-0.7424	2.79496	0.0145324	0.0363294	-3.76555
TMBIM1_S83	1.44309	-0.6545	5.05779	8.56e-05	0.000465305	1.09394
LCP1_S257	1.44256	-0.988357	4.2289	0.000519591	0.0021848	-0.716824
VWA5A_S639	1.44209	-0.604857	4.04447	0.000780685	0.00309176	-1.12259
SYN1_S62	1.44138	0.215	5.33034	4.8e-05	0.000281196	1.67894
FAM122A_S231	1.44131	-1.04036	4.75388	0.000164747	0.000820398	0.434347
PCNP_T139	1.44124	-0.700714	4.1344	0.000640029	0.00260588	-0.924768
KIAA1211L_S609	1.44116	-0.307857	3.55762	0.00229227	0.00771668	-2.18844
AMER2_S551	1.44107	-0.165	4.40256	0.000354638	0.00157948	-0.334995
XRCC4_T222	1.43965	-0.922538	5.2611	6.7e-05	0.000375803	1.396
ERICH3_S1075	1.43861	-0.811727	4.76879	0.000260801	0.0012198	0.179282
TBC1D1_S503	1.43788	-0.854846	3.15425	0.00587709	0.0169486	-3.06856
SYNPO2_S638	1.43763	-0.413364	2.76214	0.0147129	0.0366786	-3.85939
SLC4A5_S227	1.43746	-0.678	4.99148	0.000169668	0.000842199	0.61491
TP53BP2_S704	1.43509	-0.677357	4.96018	0.000105524	0.000559335	0.882848
SETD5_S591	1.43477	-0.829	6.15546	1.99e-05	0.000133749	2.76996
SSR3_S105	1.43458	-0.961429	6.20996	7.86e-06	5.96e-05	3.51242
ASIC4_S614	1.43417	-0.5085	4.97537	0.000215392	0.00103427	0.442867
AMOTL1_S828	1.43333	-1.46643	4.44191	0.000325311	0.00147263	-0.248562
AHNAK_S379	1.43318	-0.537929	3.52252	0.00247704	0.00823148	-2.26464
CRTC2_S433	1.43291	-0.479667	3.2245	0.00539037	0.0157591	-2.93774
KPNA3_S60	1.43238	-0.832214	5.5174	3.24e-05	0.000201223	2.07623
PDCL_T94	1.4322	-0.852154	5.3034	6.15e-05	0.000348209	1.48344
PIKFYVE_S88	1.43217	-0.5833	4.28164	0.000791947	0.00312773	-0.877097
TNRC6B_T565	1.43171	-1.28609	5.56608	5.76e-05	0.000328494	1.71294
NCOR1_S992	1.43149	-1.32964	4.32018	0.000424995	0.00184158	-0.516051
RIMS1_S324	1.43138	0.100429	2.83485	0.0110968	0.028919	-3.71987
TSC2_S1452	1.43127	-0.6025	8.09222	2.31e-07	2.97e-06	7.09675
RCSD1_S68	1.43087	-0.739667	4.36583	0.000497911	0.00210594	-0.530752
MAP1B_S1168	1.42982	-0.535571	3.37159	0.0034547	0.0108355	-2.5907
SLAIN2_S391	1.4296	-1.13933	6.06148	1.77e-05	0.000121378	2.8124
TBC1D10B_S687	1.42947	-0.997143	6.69221	3.04e-06	2.65e-05	4.47665
MAP1A_S1172	1.42884	-0.107143	4.07335	0.000732422	0.00292688	-1.05908
HCN2_S124	1.42811	0.240333	4.14278	0.00078984	0.00312169	-1.03288
RANBP2_S1509	1.42807	-1.12564	5.22139	6.04e-05	0.000343046	1.44591
TBC1D24_S473	1.4272	-0.106286	3.50281	0.00258716	0.00853271	-2.30735
NCBP1_S22	1.42662	-1.09171	4.76432	0.000161058	0.000804609	0.457127
SPTBN1_S2316	1.42645	-0.492615	5.76737	2.42e-05	0.000157351	2.42934
ST5_T360	1.42642	-0.899786	4.97497	0.000102223	0.000543268	0.914879
PARD3_S1261	1.42575	-0.5232	3.47252	0.00382942	0.0118304	-2.45677
PRCC_S212	1.42487	-0.790167	3.59029	0.00250542	0.00830936	-2.14264
KIDINS220_S919	1.42432	-1.79364	6.41236	1.27e-05	9.06e-05	3.2519
EPS15_T671	1.4243	-1.00169	3.09454	0.0066752	0.0188352	-3.19229
MCAM_S606	1.42397	-0.32125	3.92993	0.00123046	0.00452784	-1.47629
KIAA1211L_S92	1.42314	0.0538333	4.97332	0.000144943	0.000733006	0.676251
ASAP3_S291	1.42306	-1.25092	4.13195	0.000807818	0.00317985	-1.05543
ALB_T92	1.42252	-0.3371	4.64042	0.000401052	0.00175215	-0.134116
PHACTR4_S280	1.42251	-1.324	2.71783	0.0153741	0.0380772	-3.95238
ABI3_S342	1.4225	-0.3605	4.17076	0.00097993	0.00374615	-0.924566
CBL_S667	1.42225	-0.858231	3.15201	0.00590524	0.0170127	-3.07321
TSC2_S1371	1.42197	-0.937083	5.57417	4.46e-05	0.000263628	1.87352
KCTD5_S29	1.42164	-1.09471	4.4844	0.000296396	0.00136006	-0.155297
RPP30_S251	1.42065	-0.932846	6.15425	1.14e-05	8.2e-05	3.19799
PPP2R5E_S32	1.42	-0.593846	7.28973	1.39e-06	1.36e-05	5.3383
KDM3B_S727	1.41985	-1.08615	5.56504	3.62e-05	0.000221038	2.01991
MARCKSL1_S135	1.41984	-0.852357	4.17852	0.000580647	0.00240072	-0.827686
EEF2_T54	1.41958	-1.659	3.87408	0.00174185	0.00609694	-1.67041
PPP1R1B_S46	1.41893	-0.0905714	6.18816	8.21e-06	6.19e-05	3.46811
LBR_S67	1.41863	-0.910333	3.75973	0.00175654	0.00613662	-1.83094
EPN1_S521	1.4182	-0.3115	5.61439	2.65e-05	0.00016992	2.28076
STK33_S441	1.41564	-0.643857	3.95499	0.000951524	0.00365349	-1.3193
DOCK10_S1305	1.4151	-0.500231	6.48733	6.02e-06	4.75e-05	3.84408
ARHGAP9_S571	1.41478	-1.3505	4.00502	0.000851841	0.00332264	-1.20934
EMD_S120	1.41429	-0.845	4.15193	0.000774987	0.00307221	-1.01385
PCYT1A_T342	1.41396	-1.26155	4.50518	0.000437006	0.00188512	-0.342537
SH3GL1_S300	1.41332	-0.311636	5.05006	0.000151673	0.000763781	0.728651
LARP1_S689	1.41317	-0.298818	3.76211	0.00193708	0.00668281	-1.86786
SLK_S340	1.41279	-0.766545	4.77306	0.000258644	0.00121109	0.187688
ATG2A_S403	1.41253	-0.954846	3.63881	0.00207488	0.00709747	-2.04701
CTTN_S113	1.41242	-0.760786	3.7838	0.00138988	0.00502553	-1.6949
RTN4_S182	1.41229	-0.5285	4.45444	0.000316502	0.00143922	-0.221063
PLEKHG2_S1310	1.41203	-1.773	2.87306	0.0117768	0.0303422	-3.64466
PKN1_S582	1.41142	-0.6781	5.55452	7.61e-05	0.000420561	1.50289
ELMSAN1_S996	1.41126	-1.07183	4.6794	0.000262117	0.00122536	0.0770734
MAP1B_T1896	1.41086	-0.793818	3.19698	0.00611392	0.0175337	-2.97398
TTC14_S630	1.4108	-1.27438	5.36506	5.42e-05	0.000311886	1.61056
FLNC_S2233	1.41042	-0.5535	4.02255	0.000819461	0.00321939	-1.17081
SAMD14_S256	1.41042	-0.4275	3.1707	0.00536639	0.0157027	-3.01981
FAM169A_S449	1.41036	-0.673857	4.98511	0.000100022	0.000532554	0.93682
AHNAK_S5857	1.40942	-0.956857	4.19378	0.000561423	0.00233681	-0.7941
CHAMP1_S344	1.40849	-0.792857	5.33852	4.71e-05	0.000277351	1.69639
ESYT2_S660	1.4084	-0.2236	3.87312	0.00174511	0.00610623	-1.69022
RFTN2_S455	1.40838	-0.253786	3.45912	0.00284896	0.00924639	-2.40194
DENND2A_S365	1.40822	-1.36529	4.89211	0.00012218	0.000633051	0.73519
AHNAK_S1007	1.40725	-0.759667	3.49966	0.0030298	0.00972839	-2.33038
MAP1B_S1797	1.40722	-0.384643	4.097	0.000695134	0.00279647	-1.00705
MAP4_T681	1.40653	-0.673	3.69131	0.00223641	0.00754755	-2.01109
ZMYM3_S172	1.4062	-1.07582	4.35401	0.000589453	0.00243288	-0.673977
SYMPK_T1246	1.40611	-0.820929	4.41963	0.000341603	0.00153638	-0.297501
POLDIP3_S127	1.40515	-0.978308	5.49642	4.16e-05	0.000248541	1.87996
TNKS1BP1_S920	1.40453	-0.837923	3.53799	0.00257851	0.00850835	-2.2615
FAM129B_S665	1.40424	-0.723929	6.47793	4.62e-06	3.8e-05	4.05203
CEP128_S1008	1.40393	-1.15593	4.89639	0.000121056	0.000628121	0.744496
MAP2_S701	1.40093	-1.28655	2.58686	0.0208525	0.049261	-4.19312
CTTN_Y396	1.4001	-0.742	5.48707	4.24e-05	0.000252521	1.86085
SP100_S362	1.40004	-1.06543	4.05245	0.000767032	0.00304607	-1.10503
DPYSL3_S632	1.39976	-1.01864	3.0552	0.00690083	0.0193661	-3.26334
AHNAK_S511	1.39962	-0.323357	4.49244	0.000291225	0.0013406	-0.137653
EVL_S261	1.39907	-0.888	5.53838	3.1e-05	0.000193735	2.12057
VIM_S73	1.399	-1.08136	3.35871	0.003554	0.011102	-2.61841
DLG5_S1263	1.3989	-0.772636	5.46541	6.94e-05	0.000386801	1.49644
RAB11FIP5_S209	1.39863	-0.6779	3.91563	0.00160633	0.00568676	-1.4178
SMG8_T743	1.39862	-1.06071	4.86004	0.000130933	0.000671761	0.665512
DTNA_S564	1.39833	-1.10531	4.05315	0.000850054	0.00331631	-1.16062
ZNRF2_S135	1.39758	-0.7418	4.94763	0.000226648	0.00108085	0.391064
PSTPIP1_S377	1.39688	-1.326	4.14853	0.000780474	0.00309153	-0.981518
FRYL_S1972	1.39683	-1.2141	5.22651	0.000136418	0.000695831	0.907749
AQP4_S331	1.3966	-0.366214	4.45148	0.000318564	0.00144728	-0.227566
AHNAK2_S102	1.39518	0.170231	3.30168	0.00428641	0.0129972	-2.76064
ATF2_S112	1.39387	-0.961091	4.73466	0.000278707	0.00129302	0.0832396
LEO1_T188	1.39377	-1.02031	4.41614	0.000391149	0.00171483	-0.383724
EEPD1_S25	1.39309	-0.853357	3.18713	0.00517722	0.0152309	-2.98497
NCK2_S187	1.39233	-0.847615	5.79053	2.31e-05	0.000151526	2.47588
MICALL2_S122	1.39117	-0.635917	3.28603	0.00473981	0.0141548	-2.81173
WDR48_S373	1.39112	-0.3304	3.61501	0.00289299	0.0093607	-2.00206
ZNF521_S605	1.39102	-1.14662	4.27162	0.000532289	0.00223121	-0.692651
TNIK_S574	1.39014	-0.796636	5.03941	0.000154792	0.000777161	0.707994
PUM2_S136	1.38989	-1.1805	5.61545	2.64e-05	0.000169653	2.28299
CCDC88A_S1427	1.38943	-0.5155	6.00878	1.95e-05	0.000131885	2.71236
PI4KB_S523	1.389	-1.01093	5.10918	7.67e-05	0.000423102	1.20475
REXO1_S213	1.38883	-0.8953	3.6207	0.00286082	0.00927442	-2.16659
KDM3B_S314	1.38855	-1.36869	4.40245	0.000402708	0.00175862	-0.412953
RPS6KB1_S447	1.38833	-0.5895	2.97571	0.00819715	0.022408	-3.42934
CEP170_T644	1.3882	-0.992077	4.17783	0.000650567	0.00264238	-0.893467
SOGA1_S35	1.38702	-0.514154	2.68656	0.0157581	0.0388577	-4.01798
GPR158_S881	1.38688	-0.374462	4.61823	0.000254908	0.00119666	0.0466732
NCL_T121	1.38628	-1.54423	2.64426	0.0172008	0.0418307	-4.05115
DNMT1_S127	1.3854	-1.11821	3.7092	0.00163942	0.00578766	-1.8581
KLC1_S524	1.38529	-0.613143	6.87954	2.12e-06	1.94e-05	4.8428
LEO1_S205	1.38512	-1.08567	5.01542	0.000133253	0.000682101	0.798497
HSPB1_S15	1.38489	-0.380286	4.1372	0.00063608	0.00259242	-0.918598
SAMSN1_Y172	1.3848	-0.721	3.54298	0.00276671	0.00903034	-2.28148
MAP3K7_S389	1.38417	-0.596	4.84867	0.000157125	0.00078789	0.534326
MAP3K6_S964	1.3838	-0.8513	4.64967	0.000394156	0.00172576	-0.187824
LIMCH1_T1109	1.3834	-0.3953	3.19436	0.00662806	0.0187231	-3.01792
ATP11C_S1108	1.38311	-0.655143	5.45804	3.67e-05	0.000223218	1.95055
C11orf58_S147	1.38269	-0.827071	6.3678	5.74e-06	4.57e-05	3.8314
CTNND1_S879	1.38267	-0.946182	3.54903	0.00298659	0.00961413	-2.29866
PLCG1_S1264	1.38243	-1.53292	4.27362	0.000530018	0.00222261	-0.688368
CCDC88A_S1716	1.38225	-0.7801	3.95661	0.00148323	0.00530593	-1.5091
BRAF_T753	1.38193	-0.341786	3.51174	0.00253667	0.0083978	-2.288
CDC42EP4_S109	1.38165	-0.639846	4.14366	0.000699989	0.00281195	-0.966666
BAG3_S377	1.38157	-0.588	4.99724	0.000115339	0.000603427	0.846526
PHLDB1_S664	1.38058	-0.904385	3.7176	0.00175072	0.00612265	-1.87893
BAIAP2_S261	1.3802	-0.694071	5.61156	2.66e-05	0.000170757	2.27481
PDCD6IP_S486	1.38017	-0.1746	3.4676	0.00386672	0.0119328	-2.4664
CDC42EP4_S292	1.37936	-0.612929	5.63596	2.53e-05	0.000163573	2.32611
KLC2_S582	1.37912	-0.473667	6.8687	4.13e-06	3.44e-05	4.32803
ATRX_S704	1.37798	-0.902643	6.3878	5.52e-06	4.42e-05	3.87158
TANC1_S67	1.37729	-0.185455	3.71799	0.00211846	0.00722475	-1.92621
OSMR_S827	1.37664	-0.822786	5.29022	5.22e-05	0.000302118	1.59325
SOX6_S452	1.3756	-0.4732	3.75223	0.0022102	0.00748039	-1.92698
RGS3_S1007	1.37555	-0.622692	5.24552	6.92e-05	0.000386135	1.36376
SCRIB_S835	1.37482	-0.741214	6.85577	2.22e-06	2.02e-05	4.79661
PPP1R18_S125	1.3747	-0.535769	4.5131	0.000318383	0.00144712	-0.17697
AHNAK_T4430	1.37418	-0.748	5.31418	4.96e-05	0.000289354	1.64446
CASK_S577	1.37369	-0.901917	3.87913	0.00136822	0.0049557	-1.58216
MBD3_S56	1.37223	-1.86585	3.42155	0.00331314	0.0104713	-2.50817
DOCK6_T1310	1.37143	-0.672455	4.08981	0.000999399	0.00380542	-1.20535
DST_S5484	1.37133	-0.2188	4.51549	0.000507457	0.00213868	-0.42698
PDZD2_S1125	1.37133	-0.2668	2.78636	0.0147786	0.0368241	-3.78178
SNX17_S409	1.37122	-1.0975	5.40411	4.11e-05	0.00024632	1.83606
MATR3_T150	1.37069	-0.439357	4.23458	0.000513129	0.0021591	-0.704331
MAP1B_T1949	1.37002	-0.326929	4.86404	0.000129806	0.000667339	0.674213
PALM2-AKAP2_S951	1.36955	-1.158	4.42857	0.000380953	0.00167559	-0.357208
MICAL3_S1221	1.36949	-0.592786	4.95148	0.000107518	0.000568557	0.863985
SPP1_S288	1.36889	0.157083	3.88703	0.00134581	0.00488896	-1.5657
ADD3_S618	1.36875	-0.407	3.16172	0.00706879	0.0197495	-3.06256
RAB6A_S184	1.36687	-0.6285	6.03658	1.11e-05	8.06e-05	3.15836
TP53BP1_T326	1.36569	-1.12125	3.85759	0.00143124	0.00515013	-1.62705
MAP2_T427	1.36516	-0.498	4.34109	0.000405903	0.00177065	-0.47009
EVL_S347	1.36509	-0.483357	3.33529	0.0037418	0.0115864	-2.66871
HMGN1_S7	1.36413	-0.823143	2.57187	0.0193504	0.0462601	-4.2474
GIGYF2_S160	1.36375	-1.11867	5.509	5.05e-05	0.000294029	1.78124
SPATS2L_S165	1.36371	-1.19707	5.9979	1.2e-05	8.65e-05	3.07884
MAP3K7_S331	1.36371	-0.613071	5.56089	2.96e-05	0.000186359	2.16806
RGCC_S87	1.36342	-0.7053	6.07739	3.09e-05	0.000193519	2.42153
ITPR2_S1855	1.36305	-0.95	5.56694	3.61e-05	0.000220321	2.02378
SPECC1_S55	1.36289	-0.998143	2.89596	0.00973392	0.025934	-3.59442
MCF2L_S577	1.36273	-0.502643	6.35886	5.84e-06	4.64e-05	3.81343
MECP2_S407	1.36264	-0.447636	3.3756	0.00425101	0.0129171	-2.61659
ZYX_S267	1.36218	-1.28629	6.72433	2.86e-06	2.51e-05	4.53978
S100A11_S6	1.36209	-0.961429	4.15616	0.000610012	0.0025044	-0.876885
CLIP1_T146	1.36175	-0.6163	3.27231	0.00568334	0.0164865	-2.84769
EIF4EBP2_T46	1.36171	-0.0923333	4.01038	0.00104033	0.0039371	-1.30862
C7orf43_S497	1.36143	-0.698167	4.30919	0.00055961	0.00233119	-0.687053
STXBP5L_T757	1.3612	0.7278	3.21972	0.00630471	0.0179709	-2.96865
TRIO_S1724	1.36033	-0.5665	4.99551	9.78e-05	0.000522862	0.959339
SYNM_S653	1.35998	-0.604071	3.83112	0.00125167	0.00459667	-1.59121
SYNPO_S909	1.3595	-0.6601	2.94048	0.0109271	0.028558	-3.30464
ZZEF1_S1464	1.35927	-0.939214	4.3633	0.000386569	0.00169623	-0.421273
UBASH3B_S377	1.35922	-0.809786	5.647	2.47e-05	0.000160439	2.34929
DENND5A_S193	1.35913	-0.973929	4.67509	0.000195494	0.000952564	0.26234
NGFR_T293	1.35875	-0.764	2.79334	0.0145785	0.0364021	-3.76861
ATF7IP_S121	1.35851	-1.13693	3.50366	0.00258231	0.0085181	-2.30551
SYNM_S421	1.35749	-0.755667	3.29463	0.00465532	0.0139355	-2.79408
ZMYM3_S259	1.35734	-1.08758	4.10057	0.000862245	0.00335997	-1.12075
NUP98_T1053	1.35728	-0.876846	3.33354	0.00400312	0.0122842	-2.69371
VAMP5_S41	1.35691	-0.9365	4.18481	0.000572642	0.00237517	-0.81384
MAST2_S1436	1.35623	-0.831	5.04507	0.000104463	0.000554586	0.946635
SRGAP3_S948	1.3554	-0.468929	3.11717	0.00603083	0.0173331	-3.13299
SYMPK_S1243	1.35536	-1.2085	5.50838	3.3e-05	0.000204482	2.05717
CAD_S1900	1.35531	-0.736	4.4405	0.000427022	0.00184917	-0.415056
RAPH1_S853	1.3552	-0.579	4.40193	0.000355125	0.00158096	-0.336366
HUWE1_T3924	1.355	-0.5691	4.18467	0.000954033	0.00366033	-1.08254
NOL8_S378	1.35475	-0.869364	4.12557	0.000930179	0.00358313	-1.10311
SNRNP70_S320	1.3546	-0.976214	5.39428	4.19e-05	0.00025042	1.81515
WDFY3_S2278	1.35447	-0.709929	4.73528	0.000171531	0.000849722	0.393773
ARHGAP31_S954	1.35413	-1.3078	2.9087	0.0116307	0.0300347	-3.36501
NAV2_S1115	1.35386	-0.801545	4.86074	0.000218225	0.00104588	0.359778
BMS1_S639	1.35339	-0.978	4.70176	0.000297167	0.00136329	0.0471827
TACC2_S2317	1.35327	-0.711545	4.67862	0.000310902	0.00141747	-0.0274791
MSR1_S45	1.35315	-0.549308	4.40221	0.000402913	0.00175913	-0.413463
OGA_S515	1.352	-0.4737	5.23403	0.00013458	0.000687848	0.921566
MYLK_T1774	1.352	0.2214	2.76446	0.0154242	0.0381592	-3.84216
DBN1_S647	1.35158	-0.784071	6.87794	2.13e-06	1.95e-05	4.83969
NDRG1_S367	1.35144	0.215214	3.78338	0.00139118	0.00502929	-1.69581
CLDN5_T292	1.35118	-0.208214	3.05047	0.00697206	0.0195334	-3.27326
GAB1_S675	1.351	-0.609083	4.92109	0.000160921	0.000804164	0.570365
CTTNBP2NL_S484	1.35083	-0.83	5.02311	0.000197353	0.000959073	0.531835
MAP2_T522	1.35078	-0.749357	3.98139	0.000897551	0.00348073	-1.26129
MARK3_S489	1.35067	-0.8569	4.16131	0.000997935	0.00380128	-1.11034
RAF1_T330	1.35042	-0.733	4.38613	0.000648653	0.00263567	-0.675408
RPS6_S235	1.3502	-1.21579	3.7463	0.00151019	0.00538897	-1.77698
ATP11A_S740	1.3498	-1.15285	6.27541	9e-06	6.69e-05	3.43473
MRE11_S649	1.34975	-0.8941	3.37696	0.0046232	0.0138522	-2.64359
ARAP3_S1444	1.34949	-1.46993	3.45965	0.00284563	0.00924005	-2.40079
DOCK10_S315	1.34935	-0.548769	5.50128	4.12e-05	0.000246854	1.88989
SARNP_T65	1.34886	-1.00483	4.56073	0.000333802	0.00150543	-0.166889
ATXN1L_S284	1.34813	-0.955615	6.61886	4.7e-06	3.86e-05	4.09508
IBTK_S999	1.34811	-0.922643	6.54867	4.02e-06	3.36e-05	4.19289
NES_S931	1.3478	-0.549643	2.74382	0.0134722	0.0340408	-3.90482
USP31_S1178	1.34743	-0.268364	3.13054	0.00699711	0.0195872	-3.13797
MAP4_S636	1.34713	-0.733214	5.63504	2.53e-05	0.000163834	2.32417
PHLDB1_S682	1.3464	-0.740143	5.61405	2.65e-05	0.000169931	2.28004
ITPRID2_S425	1.34504	-0.870182	4.81765	0.000237203	0.00112507	0.275308
SLAIN1_S324	1.34437	-0.539091	3.82163	0.00171691	0.00602324	-1.74741
AFAP1_S795	1.34413	-1.32258	3.05962	0.00760067	0.0210198	-3.23123
ERICH3_S1442	1.34369	-0.413	5.53575	3.12e-05	0.000194681	2.11501
MAP1A_Y773	1.34337	-0.0765833	3.24281	0.00518807	0.0152597	-2.85891
PEX14_S252	1.3432	-0.606333	2.95068	0.00952717	0.0254977	-3.49208
NES_S1347	1.34291	-0.6685	4.66755	0.000198725	0.000965043	0.245869
MTA1_S449	1.34242	-1.32079	2.73322	0.0137787	0.0346712	-3.92621
SIGLEC8_S412	1.34233	-0.3024	2.98218	0.0100673	0.0266637	-3.40892
SHC1_Y428	1.34127	-0.972643	3.55486	0.00230625	0.00775452	-2.19442
RAP1GAP2_S505	1.34033	0.0238	3.95759	0.00148041	0.00529866	-1.50719
LIMA1_S699	1.33944	-1.02407	3.91549	0.00103844	0.00393327	-1.40607
SLC9A7_S694	1.33895	-0.372769	4.21719	0.000597984	0.00246204	-0.809158
CDK12_S102	1.33886	-0.956	5.27443	7.98e-05	0.000438232	1.28133
CTTNBP2_S1524	1.33842	-0.597846	4.86128	0.000153041	0.000769905	0.560897
FAM102A_T187	1.33803	-0.560917	4.43376	0.000432974	0.00187133	-0.428992
SCRIB_S1300	1.33783	-0.6	3.5127	0.00294807	0.00950834	-2.34423
MAP4K5_S434	1.3376	-1.00267	4.24792	0.00063517	0.00258923	-0.814267
CLASP1_S649	1.33747	-0.64	3.43978	0.00297301	0.00957653	-2.44372
PLXDC2_S495	1.33731	-0.2895	2.66437	0.0159378	0.0392564	-4.06429
MAP1B_S1366	1.33718	-0.176077	3.36181	0.00376724	0.0116562	-2.6342
DNM1L_S629	1.33702	-0.722714	3.98623	0.000887993	0.00344831	-1.25065
MAPK8IP3_T287	1.33682	-0.574786	4.94668	0.000108633	0.000572805	0.85358
PRKAA2_S489	1.3365	-0.7774	3.28512	0.00554143	0.0161289	-2.82273
ZNF608_S473	1.33625	-1.596	3.31093	0.00526639	0.0154621	-2.59273
KIF27_S911	1.33591	-0.716083	4.84713	0.00018671	0.000915965	0.419946
ARID1A_S1604	1.33589	-0.980786	6.6151	3.53e-06	3.01e-05	4.32455
MAMLD1_S387	1.33575	-0.4872	3.46159	0.00391278	0.0120639	-2.47816
PTPN12_S342	1.33435	-0.872538	4.07914	0.000803899	0.00316937	-1.10491
RPRD2_S965	1.33413	-0.908857	3.2132	0.00489037	0.0145301	-2.92958
TGFB1I1_S68	1.3338	-0.675643	3.34295	0.0036793	0.0114244	-2.65226
NUP153_T669	1.33355	-0.795846	4.59222	0.000269303	0.00125575	-0.0086063
GSK3A_S21	1.33333	-0.854143	5.75731	1.97e-05	0.000132566	2.5802
SENP1_S57	1.33304	-0.936357	5.21166	6.17e-05	0.000349126	1.42504
S100A9_T113	1.33237	-0.741545	2.62609	0.0192939	0.0461641	-4.11909
MTSS1_S298	1.3322	-0.0657	2.83192	0.0135192	0.0341419	-3.71461
BRAF_S151	1.33211	-0.537357	3.62089	0.0019931	0.00685262	-2.05078
INTS12_S378	1.3317	-1.19131	4.74747	0.000194205	0.000946972	0.320638
PHF2_S625	1.33147	-0.569143	4.22598	0.000522945	0.00219752	-0.723247
EHBP1L1_S1273	1.33098	-1.02943	4.04235	0.000784348	0.003102	-1.12724
SOX6_T454	1.33058	-0.5076	4.00985	0.00133751	0.00486582	-1.40518
RETREG2_T279	1.33021	-0.674	6.10473	2.18e-05	0.000144121	2.70382
TCF4_S617	1.33015	-0.705154	4.47463	0.000345443	0.00154749	-0.258942
OXR1_T203	1.33003	-0.30725	4.7297	0.000236692	0.00112317	0.180135
TNRC6C_S1008	1.32977	-1.20792	3.84753	0.0013231	0.00482208	-1.60113
FRMD6_S375	1.32936	-0.738455	3.57832	0.00281383	0.00915153	-2.20837
BCL9_T155	1.32924	-1.26471	4.18783	0.00056884	0.0023628	-0.807195
MFF_S157	1.32876	-0.68	5.19566	6.38e-05	0.000359679	1.39071
HBA2_S82	1.3284	-0.6156	3.03198	0.00912789	0.0245727	-3.33206
TACC1_S292	1.32807	-0.602357	4.68981	0.000189334	0.000927258	0.294509
ARHGAP24_S415	1.32762	-0.688071	5.82391	1.72e-05	0.000118176	2.71894
LZTS1_S117	1.32708	-1.17246	3.00526	0.00807007	0.0221088	-3.37611
AVEN_S261	1.32645	-0.607077	4.49031	0.000334144	0.00150619	-0.225527
PDZD2_S1613	1.32564	-0.339	3.5612	0.00227417	0.0076609	-2.18064
PACSIN2_S389	1.3249	-0.575923	4.90033	0.000141072	0.000716306	0.6431
CALCRL_S427	1.32471	-0.819	3.75615	0.0014776	0.00529143	-1.75542
SRRM2_S2702	1.32464	-1.47536	3.89496	0.00108671	0.00408388	-1.45115
MPHOSPH10_S275	1.32438	-0.822	3.52202	0.00266877	0.00876174	-2.29541
PDLIM5_S119	1.32403	-1.05038	3.72042	0.00174009	0.00609183	-1.8729
CTNND1_T310	1.32363	-0.930917	2.74953	0.0144104	0.0360806	-3.89045
TP53BP1_S814	1.32335	-1.23477	3.37943	0.00362728	0.0112959	-2.59708
KIAA1614_S1065	1.32331	-0.6775	4.79128	0.000151921	0.000764842	0.515874
RBM15_S109	1.3232	-1.3204	4.75721	0.000322399	0.00146168	0.0162489
GJA1_S328	1.3228	-0.261571	3.77579	0.00141474	0.00510168	-1.71243
STIM2_S707	1.32258	-0.879692	4.10264	0.000764369	0.00303729	-1.05457
ACIN1_S710	1.32247	-1.08136	6.06932	1.04e-05	7.62e-05	3.22551
PRR12_S386	1.32215	-0.768231	4.08559	0.000792846	0.00312947	-1.09109
NHSL1_S568	1.32111	-0.858286	4.86585	0.000129301	0.00066491	0.678142
CASC3_S125	1.3206	-1.24275	4.99479	0.000138856	0.000707547	0.719709
CCDC88A_S1443	1.32	-0.772	4.38693	0.000552162	0.00230397	-0.608054
EP400_T2258	1.3186	-1.00085	4.47195	0.000347417	0.0015542	-0.264663
GAB1_S581	1.31791	-0.427429	5.5	3.36e-05	0.000207139	2.03944
OSBPL11_S289	1.31725	-0.874417	3.97676	0.00111588	0.00417405	-1.33887
PEAK1_S727	1.31713	-0.710909	2.62913	0.0191779	0.0459622	-4.00846
PPP1R12A_S445	1.31633	-1.03621	5.9427	1.35e-05	9.55e-05	2.96506
DTNBP1_S297	1.316	-0.615818	4.10015	0.000978861	0.00374277	-1.18449
CELF1_S22	1.316	-0.8386	2.62299	0.0203079	0.0481721	-4.08758
SLC41A3_S45	1.31433	-0.444909	4.64394	0.00033272	0.00150111	-0.0961395
SLC30A6_S422	1.31415	-0.868308	6.27569	8.99e-06	6.69e-05	3.43529
CIR1_S202	1.31413	-1.218	6.19686	8.06e-06	6.1e-05	3.48581
RAB11FIP1_T358	1.31247	-0.516929	3.35154	0.00361048	0.0112541	-2.63381
C2CD2_S511	1.31233	-0.442643	5.59346	2.76e-05	0.000176572	2.23671
UBE4B_S105	1.31187	-0.825308	3.56829	0.00241552	0.00806429	-2.19712
AHNAK_S5863	1.31187	-0.913833	3.14696	0.00633716	0.0180379	-3.05431
MINK1_S701	1.31131	-0.689786	4.85277	0.000133003	0.000680996	0.649717
PAK2_S19	1.31098	-0.0761538	5.8886	1.9e-05	0.000129137	2.67226
FOXO3_S253	1.31093	-0.811143	4.01542	0.000832481	0.00326329	-1.18648
SRPK2_S545	1.31067	-0.821571	4.58814	0.000236264	0.00112141	0.0721218
PHLDB1_S51	1.31057	0.0185455	4.57179	0.000383294	0.00168369	-0.239303
AHNAK2_S1712	1.31036	-0.251364	2.72982	0.0156949	0.0387385	-3.88903
ABCF1_S140	1.31004	-1.06057	3.931	0.0010034	0.0038149	-1.37201
WNK2_T2157	1.31	-0.4845	3.53599	0.00337946	0.0106392	-2.33253
USP8_T577	1.30964	-1.00871	4.10566	0.000681956	0.00274882	-0.987987
DEK_S251	1.3088	-0.705571	4.22207	0.000527471	0.00221331	-0.73185
PRKAA1_S523	1.30873	-1.01593	4.46092	0.000312037	0.00142115	-0.206826
SKAP2_T85	1.30869	-0.581	4.0107	0.00103965	0.00393636	-1.30796
FGA_S542	1.3086	-0.4575	3.9493	0.00150445	0.00536946	-1.54121
HNRNPUL2_S188	1.30854	-0.805455	3.81677	0.00173392	0.00607338	-1.72653
MTMR3_S903	1.30837	-0.823417	4.82318	0.00019594	0.000954247	0.371139
DLG1_S709	1.30813	-1.12314	5.62426	2.59e-05	0.000167059	2.30151
WASHC2A_S250	1.30713	-0.573417	3.62052	0.00235156	0.0078827	-2.07993
C11orf96_S72	1.30687	-0.569929	4.77984	0.000155732	0.00078149	0.49095
MAML1_S529	1.30669	-1.15983	3.10401	0.00693033	0.0194381	-3.18311
AFF4_T674	1.3065	-1.17975	3.21297	0.00552178	0.0160873	-2.91986
ITPRID2_S111	1.30604	-0.962	5.38777	4.25e-05	0.000253276	1.80129
PCM1_S1474	1.30517	-0.59475	5.11921	0.000108404	0.00057225	0.970615
TP53BP1_T1061	1.30478	-1.41754	4.98376	0.000118609	0.00061829	0.818275
CBL_S669	1.30412	-0.664538	3.2198	0.00510862	0.0150533	-2.93205
UFD1_S247	1.3026	-0.668786	5.57843	2.85e-05	0.000181203	2.20506
PLEKHA4_S575	1.30113	-0.855643	4.07147	0.000735471	0.00293684	-1.06321
SRGAP2_T1014	1.30108	-0.5809	3.51285	0.00353699	0.0110592	-2.37784
ARHGAP21_T1803	1.30093	-0.79	3.12014	0.00714645	0.0199361	-3.15863
INPP5E_S233	1.30083	-0.906417	3.64591	0.00222963	0.00753476	-2.06776
MAP7D1_S232	1.30062	-0.768385	3.89401	0.00119703	0.00442017	-1.5016
TARDBP_S404	1.30043	-1.04373	4.50686	0.000435563	0.00187995	-0.368537
SH2B1_S125	1.29969	-0.664714	4.16989	0.000591808	0.00244066	-0.846675
MYO5A_S1652	1.29925	-0.436538	3.61982	0.00216155	0.00734286	-2.08745
UBAP2L_S454	1.29918	-1.19179	4.14027	0.000631779	0.00257958	-0.911836
TOR1AIP1_T221	1.29872	-0.789615	3.49025	0.00285773	0.00926888	-2.36278
TMEM237_S62	1.29869	-1.18207	2.94682	0.00872455	0.0236384	-3.48932
CD226_S290	1.29818	-0.410077	4.41028	0.000396055	0.00173257	-0.396235
SYNM_S429	1.29798	-0.654214	4.01172	0.000839308	0.00328074	-1.1946
PTPRZ1_S449	1.29693	-0.191143	4.87982	0.00012546	0.000647472	0.708506
YBX3_S293	1.2964	-0.6972	3.58029	0.00309734	0.00990377	-2.26402
SORBS1_S465	1.29638	-0.499786	4.54763	0.000258118	0.00120891	-0.0166464
C1orf35_S220	1.29609	-1.408	3.54594	0.00235219	0.00788285	-2.21381
ZNF800_T319	1.29567	-0.4424	3.51454	0.00352519	0.0110274	-2.37452
NEK9_T254	1.29556	-0.831857	4.69627	0.000186695	0.000915965	0.308614
HLCS_S226	1.2952	-0.768	4.14243	0.00103493	0.00392366	-1.16463
PHACTR2_S571	1.29514	-0.7305	5.16954	9.81e-05	0.000524109	1.07166
MTSS1L_S601	1.29509	-0.274357	3.86037	0.00117318	0.00435443	-1.52705
AMOT_S859	1.29447	-0.369273	2.8089	0.0133972	0.0338804	-3.76917
XPC_S883	1.29444	-0.547143	4.31155	0.000433142	0.00187166	-0.535035
NAV1_S199	1.29444	-0.446143	3.82653	0.00126445	0.00463855	-1.60128
ACIN1_S561	1.29393	-0.914909	4.67123	0.000315419	0.00143494	-0.0131098
FMN2_S747	1.29391	-0.270583	3.76114	0.00175137	0.00612389	-1.82801
MTDH_T143	1.29311	-0.607286	5.58	2.84e-05	0.000180859	2.20837
PRKCD_S323	1.29054	-0.599417	4.42215	0.000443425	0.00190954	-0.453002
EML1_S153	1.28949	-0.621357	4.07097	0.000736281	0.00293842	-1.06431
LIG1_S141	1.28904	-1.11707	2.87874	0.0101006	0.0267378	-3.62987
CDC42BPB_S1686	1.289	-1.1695	3.69157	0.00248923	0.00826519	-2.04589
TRRAP_S2051	1.28842	-0.557071	5.46102	3.64e-05	0.000222295	1.95688
HRH1_S380	1.28782	-0.970286	4.15547	0.000610932	0.00250716	-0.878388
SRRM2_S1421	1.28753	-1.22792	4.54941	0.000294814	0.00135373	-0.0996481
CRTC2_S613	1.2872	-0.914286	5.76021	1.96e-05	0.000132041	2.58626
FCHO2_S533	1.28713	-1.00864	3.31613	0.00390258	0.0120361	-2.70978
NHSL1_S1417	1.28708	-0.6845	3.87786	0.00172904	0.00605947	-1.66301
NDC80_S55	1.28692	-1.2614	3.27888	0.00561008	0.0163045	-2.83488
CXorf38_T314	1.28629	-1.0655	2.71917	0.0141952	0.0355948	-3.9545
FSD1L_S355	1.28606	-0.19	3.2067	0.00559458	0.0162641	-2.97412
PJA1_S265	1.28384	-0.267929	3.22456	0.00477029	0.0142374	-2.9054
LARP4B_S498	1.28375	-0.7275	3.63135	0.00280158	0.00911903	-1.97027
UCK1_S258	1.28364	-0.755	6.1175	9.46e-06	7e-05	3.32408
HMGN1_S8	1.2833	-0.978923	4.75865	0.000189705	0.000928492	0.344271
ADRM1_S211	1.2832	-0.775	3.46065	0.00391999	0.0120788	-2.49839
GLYR1_S152	1.28298	-0.764571	4.93821	0.000110629	0.000581807	0.835234
ARHGAP12_S262	1.28282	-0.524071	3.79285	0.00136231	0.00493733	-1.67507
WASHC2A_S909	1.28211	-0.849214	3.1414	0.00572071	0.0165758	-3.08184
ANK2_S3765	1.2819	-1.00346	3.6958	0.00183497	0.00637637	-1.92547
CIC_S1609	1.28129	-1.05429	6.05652	1.07e-05	7.79e-05	3.19927
NAV1_S507	1.28005	-0.975923	4.0203	0.000912215	0.00352932	-1.23102
AHNAK_S570	1.27967	-0.500692	4.56949	0.000282556	0.00130727	-0.0569363
PRR5L_S28	1.27963	-0.900462	5.5681	3.6e-05	0.000220018	2.02614
CCAR1_S685	1.27958	-0.957786	3.25011	0.00451081	0.0135654	-2.85097
STK10_S191	1.27847	-0.848071	3.79679	0.00135048	0.00490239	-1.66644
MAP4_T571	1.27843	-0.614545	4.59031	0.000369605	0.00163496	-0.173365
AMPD2_S100	1.27842	-1.04264	4.98535	0.0001	0.000532414	0.93735
MAP4_T82	1.27825	-0.540667	3.30289	0.00457553	0.0137273	-2.73585
ATXN2L_S449	1.27767	-0.8226	4.22765	0.00087836	0.00341551	-0.98163
RIPK2_S531	1.27749	-0.805643	4.10923	0.000676596	0.00273323	-0.980128
TRIM24_S744	1.27642	-1.50569	3.57839	0.00236347	0.00791542	-2.17563
TRIO_S2440	1.2762	-0.734214	5.21367	6.14e-05	0.000347928	1.42936
KIF13A_T1385	1.27612	-0.9279	3.17413	0.00689788	0.0193622	-2.85708
SYNM_S1508	1.2754	-0.1019	3.49008	0.00369916	0.0114773	-2.44077
ZYX_S202	1.27498	-0.806429	5.88226	1.52e-05	0.000106177	2.84005
GAPVD1_S761	1.27474	-0.624	5.85481	2.61e-05	0.000167996	2.41797
DSN1_S58	1.27456	-1.10636	3.03634	0.007189	0.0200354	-3.30285
SRRM2_S1864	1.27435	-1.39962	3.41482	0.00336148	0.0105909	-2.52239
KDM3B_S289	1.27313	-1.13046	3.86152	0.00128379	0.0047018	-1.57117
DENND5A_S851	1.27222	-0.798857	3.54631	0.00235023	0.00788138	-2.21299
URI1_S442	1.27176	-1.17336	2.70462	0.0146393	0.0365393	-3.98375
SPATS2L_T423	1.27105	-1.18038	2.7584	0.0135696	0.0342387	-3.87552
EIF4B_S502	1.27012	-1.0321	3.54613	0.00331268	0.0104713	-2.13604
TJP2_S492	1.27011	-0.197	4.33701	0.000609712	0.00250368	-0.678352
PCNP_S119	1.26971	-0.911643	5.68765	2.27e-05	0.00014951	2.43456
SF3B1_T278	1.26923	-0.981583	3.5988	0.00246113	0.00818806	-2.16566
GAB1_S681	1.26917	-0.619231	4.47711	0.000343629	0.00154205	-0.253651
PHC3_S854	1.26906	-0.193083	4.51147	0.000369179	0.00163343	-0.268439
SPATA18_S276	1.26873	0.432786	2.87277	0.0102309	0.0270224	-3.64215
ZRANB2_S120	1.26864	-1.13736	3.49835	0.00261277	0.00860592	-2.31703
ABL1_S588	1.26858	-0.8539	3.52825	0.00343134	0.010785	-2.34768
ABI1_S323	1.26858	-1.03271	4.73327	0.000172279	0.000852432	0.389393
MAP2_S788	1.26858	-0.313714	3.45121	0.00289909	0.0093774	-2.41904
KIAA1671_S508	1.26713	-0.499786	4.47634	0.000301672	0.00138144	-0.172979
KIF21B_S1149	1.26709	-0.275333	4.5186	0.00036383	0.00161224	-0.25373
CLASP2_S689	1.26693	-0.557846	3.2192	0.00511519	0.015066	-2.9333
MPZL1_S219	1.26617	-0.524	4.54573	0.000344192	0.00154354	-0.197797
ARHGEF17_S507	1.26558	-0.4081	3.31399	0.00523463	0.0153841	-2.76647
AVL9_S246	1.26503	-0.298333	4.27464	0.000601013	0.002473	-0.758761
ARHGAP15_S43	1.26493	-0.775571	4.1451	0.000625088	0.00255537	-0.901224
CSNK1D_S382	1.26451	-0.813833	3.95774	0.00116106	0.00432061	-1.41833
EDC3_S161	1.26438	-1.28021	3.3829	0.00336983	0.0106123	-2.56638
BRPF1_S866	1.26418	-0.925286	3.70506	0.00165451	0.00582663	-1.86715
CFL1_Y68	1.26406	-0.473167	3.56121	0.00266293	0.00874985	-2.24367
CD99_T181	1.26375	-0.8285	2.62623	0.0185205	0.0446094	-4.0874
PRRC2A_S456	1.26353	-1.01115	5.87398	1.96e-05	0.000132128	2.64305
PLCL1_S569	1.2634	0.255923	2.85289	0.0111329	0.0289832	-3.68605
FAM208A_S673	1.26338	-0.719571	6.26824	6.99e-06	5.39e-05	3.63058
QRICH1_S345	1.26336	-0.824455	3.79085	0.0018274	0.00635882	-1.77892
FLNA_S1533	1.2632	-0.242857	3.90527	0.0010622	0.00400671	-1.42852
WDFY3_S3335	1.26231	-0.412286	4.08085	0.000720372	0.00288292	-1.04256
LMNA_S22	1.26227	-0.692857	3.79728	0.00134903	0.00489979	-1.66538
EIF4B_S523	1.26203	-0.504583	5.49311	5.21e-05	0.000301642	1.71444
VSIR_S235	1.26169	-0.480286	3.89653	0.00108294	0.00407275	-1.4477
C2CD5_S830	1.26167	-0.306071	3.0328	0.00724442	0.0201564	-3.31026
CHAMP1_S443	1.26087	-0.736545	4.4485	0.000488764	0.00207552	-0.484949
RHPN2_S639	1.26073	-1.13523	4.61306	0.000257704	0.00120725	0.0356946
TMEM230_S86	1.25974	-0.45525	3.49476	0.00306108	0.0098085	-2.38139
TOM1L2_S423	1.25957	-0.37175	3.553	0.00270919	0.00887275	-2.2607
OSBPL6_S44	1.25902	-1.35357	4.59689	0.000231798	0.0011028	0.0912771
IGF2R_S2401	1.25876	-0.9988	4.69667	0.000360955	0.00160056	-0.0275464
MLLT1_S292	1.25851	-0.630643	2.94076	0.00883926	0.0239138	-3.50188
RAVER1_S584	1.25764	-1.09029	3.89072	0.00109697	0.0041123	-1.46047
CDC42EP4_S118	1.25733	-0.831286	4.06861	0.000740122	0.00295199	-1.06949
C1orf226_S241	1.25671	-1.45029	3.70774	0.0016447	0.00580019	-1.86128
BSDC1_S404	1.25625	-0.614182	4.70439	0.000295647	0.00135724	0.0523705
NUCKS1_S113	1.25538	-0.755429	5.35828	4.52e-05	0.000267126	1.73852
PXN_S250	1.25516	-0.811286	3.43553	0.00300103	0.00964983	-2.45291
KAT6A_S974	1.25493	-0.942091	3.13457	0.00694021	0.0194604	-3.0981
FRYL_S1914	1.2546	-0.711929	3.11715	0.00603108	0.0173331	-3.13303
RFX1_S933	1.25433	-0.7676	3.50963	0.00355948	0.0111123	-2.38414
GLCCI1_S223	1.25409	-0.955	4.03868	0.000790746	0.00312363	-1.13533
MSN_S384	1.2538	-0.449214	3.47401	0.00275693	0.00900423	-2.36973
ZC3H13_S25	1.2536	-0.459667	3.08973	0.00713937	0.0199218	-3.21205
MAP4_S1073	1.25327	-0.823071	3.78088	0.00139889	0.00505266	-1.70129
ZMYND8_S637	1.25325	-0.8862	4.62426	0.000413407	0.00179717	-0.219261
TNKS1BP1_S1652	1.25316	-0.656	3.39734	0.00326436	0.0103496	-2.53527
TNS3_S850	1.25238	-0.279692	3.59019	0.00230412	0.00774883	-2.15053
ZDHHC2_S333	1.25224	-0.564214	4.43312	0.000331646	0.00149694	-0.267877
FAM120A_S487	1.25217	-0.9978	5.1544	0.000155401	0.000780022	0.775071
LZTS1_S209	1.25111	-0.963286	2.63912	0.0168075	0.0410624	-4.11454
PITPNM2_S305	1.2505	-0.398538	4.5911	0.000269942	0.00125815	-0.0109904
YTHDC2_S1202	1.24969	-1.13557	3.80264	0.00133312	0.00485334	-1.65363
TRIM56_T418	1.24924	-1.19929	4.03871	0.000790696	0.00312363	-1.13526
RTN1_S560	1.24874	0.0361667	3.07784	0.00731805	0.020336	-3.2361
MICALL2_S649	1.24842	-0.6118	2.67106	0.0185003	0.0445661	-3.99819
BCL9_S857	1.24826	-0.59475	3.86858	0.00139875	0.00505266	-1.60417
CAD_S1859	1.248	-1.14629	4.25875	0.000486522	0.00206951	-0.651161
DLG1_S706	1.24695	-0.872154	3.89342	0.00119856	0.00442502	-1.50287
NES_T338	1.24664	-1.08321	3.16388	0.00544686	0.0159012	-3.03426
ARHGAP12_S176	1.24644	-0.681286	5.95328	1.32e-05	9.36e-05	2.98691
EIF4B_S406	1.24644	-0.836286	2.90385	0.00957026	0.0255791	-3.57816
AHNAK_S2185	1.24564	-0.963182	3.50089	0.003294	0.0104321	-2.36453
CDK9_S347	1.24504	-0.767786	5.28605	5.27e-05	0.000304355	1.58434
RTN4_S515	1.24463	0.266909	3.36621	0.00433306	0.013115	-2.66695
BIN2_T532	1.24458	-0.5075	2.77409	0.015137	0.037564	-3.80494
BAG3_S289	1.24431	-0.149714	3.64133	0.00190502	0.00659252	-2.00624
BRAF_S333	1.24425	-0.166	3.02284	0.00820395	0.0224168	-3.30537
MDC1_S402	1.24369	-0.739083	3.07804	0.007315	0.0203303	-3.2357
NES_S768	1.24362	-1.08507	5.11462	7.58e-05	0.000419218	1.21648
ROCK2_S1362	1.24354	-0.926	4.17249	0.000742608	0.00296015	-0.971066
LCA5_S7	1.2426	-0.63925	3.14399	0.00637655	0.0181398	-3.10192
BCLAF1_S119	1.24255	-1.16885	3.15624	0.00585214	0.0168935	-3.06442
INPPL1_S158	1.24198	-1.08569	3.2912	0.00438389	0.0132509	-2.78263
SYN1_T667	1.24047	0.165357	5.33111	4.79e-05	0.000280823	1.68058
SAP30BP_S18	1.24003	-0.85375	2.99074	0.00876867	0.0237505	-3.41174
PLCL1_S77	1.24002	0.100308	3.06534	0.0071032	0.0198346	-3.25257
PLA2G4A_S435	1.23967	-0.5361	4.91135	0.000242302	0.00114441	0.376135
PLCB3_T501	1.23953	-0.742909	2.83327	0.0127577	0.032513	-3.72198
TNFAIP3_S573	1.2395	-1.29683	3.55426	0.00270202	0.00885361	-2.21732
RANBP2_S1871	1.23942	-0.5024	3.9737	0.00143477	0.00516096	-1.47573
MPZ_S195	1.23942	1.1581	3.02035	0.00933911	0.0250533	-3.33559
DDI2_S194	1.23938	-0.451143	3.06793	0.00671266	0.0189303	-3.23663
EIF4B_S230	1.239	-0.7105	3.38565	0.00334948	0.010563	-2.56045
IGFBP7_S239	1.239	-0.707462	3.05399	0.00727684	0.0202382	-3.27598
RBBP6_T1468	1.23893	-0.808909	3.85811	0.00159469	0.00565052	-1.64296
ZNF592_S460	1.2389	-1.5	3.3439	0.00391506	0.0120691	-2.67192
FUCA2_S301	1.23867	-0.624636	4.46748	0.000470765	0.00201266	-0.447055
AFAP1L2_S849	1.23863	-0.126231	3.31864	0.00413325	0.0126297	-2.72503
PIKFYVE_S105	1.2384	-1.00271	3.7091	0.00163976	0.00578784	-1.85831
SH3PXD2A_S988	1.23733	-0.196909	4.38472	0.000554591	0.00231219	-0.612483
DOCK11_S296	1.23654	-0.458917	5.23341	8.65e-05	0.000469155	1.19949
ERF_S21	1.23636	-1.023	5.26513	5.5e-05	0.000316052	1.53959
CHAMP1_S311	1.2356	-0.599769	3.88453	0.00122172	0.00449982	-1.52191
LCP2_S410	1.23551	-1.28192	4.28969	0.000582613	0.00240761	-0.727528
NSFL1C_S179	1.2355	-0.825909	3.22541	0.00577055	0.0166915	-2.94902
RSF1_S882	1.23475	-0.917	3.57461	0.00283513	0.0092119	-2.21585
BCLAF3_S100	1.23454	-1.17675	3.82018	0.00154775	0.0055016	-1.70502
ARHGAP6_S873	1.2345	-1.00636	3.61944	0.0025881	0.00853443	-2.15643
PAK2_S58	1.23438	-1.04893	3.29382	0.00409855	0.0125313	-2.75758
ZC3H13_T317	1.23404	-0.770714	4.71562	0.000179008	0.000881614	0.350875
FAM169A_T503	1.23275	-0.4289	4.11973	0.00108128	0.004068	-1.19116
NFIB_S312	1.2327	-0.755385	2.67491	0.0161433	0.0397189	-4.04094
LEMD2_S139	1.23243	-0.830636	4.45652	0.000481075	0.00204978	-0.468936
TCF12_S98	1.23218	-0.599364	5.45943	7.01e-05	0.00039047	1.5122
PRKAB2_T40	1.23197	-0.44025	3.13627	0.00647995	0.0183784	-3.11761
APC_S2308	1.23158	-1.29393	3.49284	0.00264471	0.00869548	-2.32895
HPS5_S563	1.2314	-0.803214	6.03949	1.11e-05	8.02e-05	3.16433
CLCN7_S61	1.23096	-0.697929	4.19385	0.000561338	0.00233681	-0.79395
PCDH9_T954	1.23037	-0.8678	3.06204	0.00860334	0.0233634	-3.07255
COPB2_T861	1.23029	-0.6375	4.82169	0.000142246	0.000721358	0.582088
IGFBP5_S116	1.23016	-0.772214	4.55761	0.00025255	0.00118697	0.00523049
XPC_S94	1.23	-0.729714	3.94835	0.000965612	0.00369772	-1.33389
PLEKHA2_S184	1.22968	-0.878923	3.44263	0.00316628	0.0100927	-2.46362
RAPH1_S1183	1.22917	-1.05545	3.49302	0.00334717	0.0105574	-2.41168
CARMIL1_S880	1.22907	-1.00515	3.85777	0.00129421	0.0047305	-1.5792
KIAA0232_S1294	1.22762	-0.448786	6.05592	1.07e-05	7.8e-05	3.19803
ZNF185_T158	1.2272	-0.171182	3.69024	0.00224126	0.00756138	-2.01325
MAP2_T290	1.2268	-0.649154	4.61771	0.000255191	0.0011977	0.0455598
PRRC2C_S878	1.2265	-1.09767	4.62587	0.000292266	0.00134421	0.00533169
SPEN_S1261	1.22531	-0.9765	5.01696	9.34e-05	0.000502283	1.00573
AAK1_S670	1.22483	-0.667538	6.641	4.51e-06	3.72e-05	4.1371
SDC3_Y431	1.22457	-0.443333	2.73564	0.0148254	0.0369208	-3.91763
SRRM2_S2121	1.22375	-0.941077	3.80688	0.00144421	0.00519028	-1.6881
GATAD2B_S486	1.223	-0.641091	4.71027	0.000292275	0.00134421	0.0350886
GAPVD1_S758	1.2226	-0.2663	3.98767	0.00139635	0.00504709	-1.46626
RANBP2_S2805	1.2224	-0.8258	2.77202	0.0151984	0.0376885	-3.82792
ZNF185_S497	1.2217	-0.411615	4.45867	0.000357346	0.00158805	-0.292969
PALM2-AKAP2_S366	1.22147	-1.66643	2.95153	0.00863643	0.0234461	-3.47956
RRM2B_S92	1.22144	-0.684214	5.08173	8.13e-05	0.000445084	1.14559
ZFYVE16_S946	1.22113	-0.735462	3.31812	0.00413785	0.0126399	-2.72612
ARHGEF11_S1335	1.22093	-0.597538	4.54109	0.000300051	0.00137527	-0.117354
SPP1_S247	1.22044	0.00842857	3.40673	0.00319758	0.0101715	-2.51504
DOP1B_S1021	1.2202	-0.859692	3.01084	0.00797509	0.021899	-3.36467
MAST3_S754	1.21973	-0.0777143	2.74123	0.0135466	0.0341982	-3.91006
TBC1D10A_S414	1.21962	-1.02664	3.52771	0.00244881	0.00815381	-2.25338
ANXA2_S30	1.21947	-0.782143	4.56421	0.000248936	0.00117244	0.0196914
BCR_S698	1.21903	-0.585727	3.34926	0.00448525	0.0135067	-2.70101
FAM53B_S118	1.21896	-0.203214	5.48707	3.45e-05	0.00021217	2.01206
AFAP1L1_S329	1.21877	-0.833615	3.60442	0.00223456	0.00754419	-2.12026
NOP2_S58	1.21875	-0.5505	2.72678	0.0166002	0.0406396	-3.89395
SPTAN1_S1029	1.21873	-0.198071	3.61051	0.00203936	0.00699495	-2.07338
PRRC2C_S187	1.21779	-0.986455	3.72091	0.00210598	0.007188	-1.92033
AKAP13_S1910	1.21748	-0.964615	4.97862	0.000119881	0.000623951	0.8075
WNK1_S2546	1.21657	-0.355667	2.93853	0.00976949	0.026015	-3.51638
BIN2_S443	1.21656	-0.817071	4.68466	0.000191467	0.000936564	0.283253
MFF_S155	1.2164	-0.902571	4.65412	0.000204619	0.00098875	0.216508
CAST_S34	1.2162	-0.846643	3.34173	0.00368921	0.0114534	-2.65489
ABCF1_S105	1.21587	-0.686429	3.94147	0.000980426	0.00374662	-1.34901
DENND4C_S1274	1.21563	-0.0989167	2.79812	0.0130456	0.0331159	-3.79505
KIAA1671_S465	1.21495	-0.5678	3.16284	0.00705317	0.0197168	-2.99969
NACAD_S1303	1.21473	-0.388923	4.33133	0.000468584	0.00200503	-0.564918
ZC3H4_S807	1.21458	-0.826	5.4737	3.55e-05	0.000217328	1.98375
C2orf49_S193	1.21451	-0.708357	4.60984	0.000225344	0.00107515	0.119621
MAP1B_S1248	1.21418	-0.355385	3.31759	0.00414254	0.0126523	-2.72723
ARHGAP44_T804	1.2139	0.469385	3.8749	0.00124732	0.00458154	-1.54252
YEATS2_S576	1.21362	-0.687786	6.49472	4.47e-06	3.69e-05	4.08551
SOX2_S37	1.21351	-1.67271	2.68088	0.0153922	0.0381081	-4.0313
DOK3_S330	1.21325	-0.789333	2.70625	0.0157416	0.0388299	-3.93262
PKN1_S579	1.21282	-0.645545	2.86179	0.0120469	0.0309471	-3.63432
ZNF592_S78	1.21198	-1.11023	5.50962	4.05e-05	0.000243469	1.90691
C12orf45_S15	1.21151	-0.988429	2.75908	0.0130426	0.0331125	-3.87399
SPECC1L_S948	1.2115	-0.848818	4.74943	0.000270808	0.00126189	0.112369
NFATC1_S261	1.21129	-0.857818	3.58418	0.00278048	0.00906646	-2.19653
FBLN1_S147	1.21093	0.273615	3.86408	0.00127674	0.00467938	-1.56569
LRCH4_S521	1.21073	-0.734929	3.4052	0.00320839	0.0101994	-2.51834
HMGN1_S25	1.21071	-0.534714	3.64228	0.00190102	0.00658204	-2.00416
NFATC3_S344	1.21067	-0.581364	4.01657	0.00115804	0.00431173	-1.35321
AHNAK_S5731	1.21044	-0.725143	3.33097	0.00377748	0.0116861	-2.67798
SLC6A11_S21	1.2104	-0.239667	2.75918	0.0141289	0.0354505	-3.87155
NEK6_S240	1.21029	-1.02264	4.10993	0.00067555	0.0027301	-0.978587
SF3B1_T350	1.20887	-0.745923	3.91657	0.00114029	0.0042543	-1.4533
TGS1_S405	1.20831	-1.12357	5.3673	4.44e-05	0.000262873	1.75771
ARHGEF7_S776	1.20798	-0.926357	6.56771	3.87e-06	3.26e-05	4.23069
EIF3C_S201	1.20767	-0.710727	3.162	0.00656412	0.0185738	-3.07542
AGFG1_S317	1.20711	-0.56	4.8075	0.00014668	0.000740861	0.5512
SLC45A4_S348	1.20704	-0.656364	4.69207	0.000302842	0.00138583	0.0280463
MDC1_T1157	1.20698	-0.769714	2.70094	0.0147536	0.0367709	-3.99113
BICRAL_S934	1.20617	-0.689462	3.50959	0.00274117	0.00896002	-2.32178
CEP350_S1648	1.20583	-0.74	5.66323	3.76e-05	0.000228029	2.04738
PRRT3_S815	1.20582	-0.127846	5.8627	2e-05	0.000134572	2.6205
AGFG1_S181	1.20571	-1.34033	2.60645	0.0192769	0.0461447	-4.16789
XRCC1_S266	1.20567	-0.8189	4.29361	0.000774002	0.00307012	-0.853952
SIK3_Y1083	1.20567	-0.314636	2.97439	0.00960022	0.0256489	-3.44648
CDC42EP1_S192	1.20505	-0.259769	4.74313	0.000195981	0.000954247	0.311463
RICTOR_S1409	1.20504	-0.662071	2.97937	0.00813255	0.0222588	-3.42173
AHNAK_S819	1.20502	-0.570857	4.652	0.000205566	0.000993001	0.21187
MICALL1_S612	1.20485	-0.796846	3.50315	0.00277948	0.00906616	-2.33545
ATF7IP_S65	1.20478	-0.9835	5.60685	2.69e-05	0.000172219	2.26489
RHBDF2_S325	1.2046	-0.618083	5.21679	8.94e-05	0.00048256	1.16627
BOD1L1_S870	1.20456	-1.16536	3.06434	0.00676519	0.0190545	-3.24416
FAM102A_S230	1.2043	-0.311091	3.38998	0.00412839	0.0126168	-2.61918
TNKS1BP1_S1297	1.20396	-0.409571	3.71446	0.00162043	0.00572563	-1.8466
DENND1B_S596	1.20394	-0.5155	5.03758	0.000127495	0.000656964	0.80619
ENSA_S125	1.20378	-0.852857	3.46741	0.00279731	0.00910955	-2.38399
CDC5L_T355	1.20358	-0.9499	2.77886	0.0149969	0.0372733	-3.79595
ATAD2_T1152	1.20355	-0.800846	3.70813	0.00178684	0.00623384	-1.89916
RNF214_S200	1.20298	-0.809143	4.39985	0.000356755	0.00158682	-0.340952
AHNAK2_S4187	1.20146	-0.244818	3.07947	0.00776098	0.021387	-3.2073
CMTM4_S183	1.20125	0.0928182	3.00172	0.00908416	0.0244713	-3.36067
DLGAP4_S665	1.201	0.0224167	4.25456	0.000626502	0.00256063	-0.800472
AHNAK_T4766	1.20096	-0.731643	5.57793	2.85e-05	0.000181337	2.20399
ITPRID2_S316	1.20051	-0.7235	3.04473	0.00783943	0.0215796	-3.30302
TJP1_S268	1.20029	-0.393214	5.72489	2.11e-05	0.000140135	2.51248
IQSEC1_S911	1.19984	-0.198929	5.58211	2.83e-05	0.000180333	2.2128
CUEDC2_S110	1.19953	-0.371929	4.14048	0.000631491	0.00257893	-0.911382
RHBDF2_T175	1.19942	-0.4019	5.21898	0.000138282	0.00070498	0.893927
GOLGA4_S288	1.1992	-0.646714	4.66147	0.000201371	0.000976483	0.232579
SLC4A1AP_S712	1.19889	-0.746182	3.83815	0.00166043	0.00584338	-1.6833
SASH1_S486	1.19864	-0.138357	4.95393	0.000106952	0.000566011	0.8693
GTF3C2_T233	1.1985	-0.653	4.80254	0.000204272	0.000987699	0.366706
CDK11B_S65	1.19837	-1.01746	4.36696	0.000434315	0.00187512	-0.488762
SH3BP2_S282	1.19749	-1.39321	3.42952	0.00304102	0.00975974	-2.46588
PARG_S261	1.197	-0.2507	2.92643	0.0112328	0.0291943	-3.5346
NFIC_S194	1.19617	-1.1927	3.43941	0.00408763	0.0125073	-2.52154
PRMT3_S25	1.19569	-0.744857	3.86093	0.00117174	0.0043507	-1.52584
FOXO4_S262	1.1956	-0.2678	3.00616	0.00960363	0.0256512	-3.38174
ARHGDIA_S34	1.19491	-0.327357	4.04348	0.000782397	0.00309671	-1.12477
HNRNPU_T286	1.19475	-0.5491	3.84712	0.00183592	0.00637856	-1.72314
DDX17_S64	1.1946	-0.31025	3.00348	0.0085402	0.0232107	-3.38614
USP47_S868	1.1945	-0.566583	4.03308	0.000992269	0.0037822	-1.22164
TNKS1BP1_S893	1.19431	-1.18457	3.09542	0.00632324	0.0180059	-3.17883
DMXL1_S1258	1.19422	-0.729714	5.17835	6.62e-05	0.000371605	1.35354
CDK12_S644	1.1938	-0.725364	3.64137	0.00247526	0.00822693	-2.1121
PDAP1_S176	1.19371	-0.430636	3.47563	0.00346779	0.0108715	-2.41542
WNK1_S2562	1.19325	-0.554	3.82469	0.00153322	0.00546149	-1.65545
GSK3B_S9	1.19324	-0.477286	2.60497	0.0180563	0.0436478	-4.1822
CDC42EP4_S142	1.1929	-0.823692	2.98971	0.00834062	0.0227541	-3.40798
TP53BP1_S335	1.19215	-0.710231	2.91701	0.00972675	0.0259183	-3.55626
MEPCE_S254	1.19213	-0.903	3.82281	0.00153927	0.00547864	-1.65937
USP36_S612	1.19175	-1.0569	3.16074	0.0070825	0.0197823	-2.88289
PCDHGC3_S780	1.19147	0.00185714	2.75706	0.0130987	0.0332255	-3.87807
ABL2_S819	1.1914	-0.9549	3.00889	0.00955222	0.0255478	-3.37649
WASHC2A_S1114	1.19	-0.634273	3.38446	0.0041751	0.0127286	-2.59882
FBXO42_S488	1.18973	-0.930545	5.28273	9.76e-05	0.000521928	1.14894
PITPNM2_S368	1.18891	-0.142333	4.60542	0.000304704	0.00139311	-0.0748896
DOCK10_T1453	1.18829	-0.591167	4.51049	0.000369922	0.00163567	-0.270465
AFTPH_S517	1.18798	-0.8235	5.15771	6.92e-05	0.000386135	1.30918
AFAP1L1_S745	1.18782	-1.31577	3.46123	0.00304204	0.00976145	-2.42427
RPS6KA1_S389	1.18767	-0.3635	3.27613	0.00426065	0.0129425	-2.79539
EDC3_S131	1.18758	-1.07264	3.9993	0.000862693	0.00336107	-1.22192
UPF2_T1088	1.18749	-0.602786	6.11336	9.54e-06	7.05e-05	3.31562
GAB2_S210	1.18742	-0.839923	4.09167	0.000782579	0.00309682	-1.07808
ACBD3_S43	1.1872	-0.760333	3.94564	0.00119076	0.00440439	-1.44355
PICALM_S353	1.18643	-0.975083	3.60098	0.00244988	0.00815466	-2.16112
NCF2_S332	1.1864	-0.556286	4.36524	0.000384919	0.00168935	-0.416992
WDCP_S468	1.186	-0.769429	5.37762	4.34e-05	0.00025813	1.7797
C17orf49_S110	1.18593	-0.466182	5.25311	0.000103183	0.000548078	1.1198
CIC_S1186	1.18568	-0.802846	2.94373	0.00919298	0.0247215	-3.50188
RAPH1_S983	1.1854	-1.16408	5.09797	9.37e-05	0.000503163	1.05709
MAP1B_S582	1.18475	-0.358833	3.57124	0.0026075	0.00859094	-2.18213
FOXK1_S101	1.18449	-0.946857	4.90078	0.000119916	0.000623972	0.754026
CCDC43_T139	1.18373	-0.576571	3.42437	0.00307573	0.00984919	-2.47699
VAMP5_S48	1.18349	-0.423214	2.96584	0.00837373	0.0228197	-3.44985
PCM1_S2001	1.18344	-0.545786	3.28053	0.00421976	0.0128434	-2.786
PPFIBP2_S387	1.18327	-0.514071	3.97137	0.000917658	0.00354659	-1.2833
PEA15_S137	1.18302	-0.748714	4.94384	0.000109299	0.000575711	0.847427
PHF2_S853	1.18253	-0.852	4.01536	0.000832579	0.00326329	-1.1866
SRRM2_S1198	1.18249	-1.15757	2.96687	0.00835516	0.0227876	-3.44772
ZC3H7B_S217	1.1824	-0.396545	3.78901	0.00183425	0.00637605	-1.81343
USP36_S742	1.1824	-1.24923	3.06763	0.00706865	0.0197495	-3.24785
SRSF9_S197	1.18231	-1.50808	3.00985	0.00842801	0.0229522	-3.37331
FMNL2_S171	1.1822	-0.246786	3.84255	0.00122038	0.00449651	-1.56614
ATP2B4_S1117	1.18213	-0.274462	3.95053	0.0010599	0.00399877	-1.38053
CCNYL1_S105	1.18178	-0.293714	3.02089	0.0074338	0.020615	-3.33516
PPP1R18_S195	1.1804	-0.541	4.67094	0.000228103	0.00108676	0.158536
RASAL3_T991	1.18009	-0.836429	4.95095	0.00010764	0.000568906	0.862838
MDC1_T1608	1.1795	-0.851333	4.35118	0.000513173	0.0021591	-0.561076
AMOTL1_S241	1.17889	-0.858455	3.50561	0.00326254	0.0103455	-2.35503
PIK3CG_S974	1.17886	-0.717667	4.64071	0.000283571	0.00131106	-0.00235255
LBR_S99	1.17883	-0.744	4.1453	0.000894088	0.00346863	-1.09347
HTATSF1_S403	1.17831	-0.926286	2.82013	0.0114514	0.0296667	-3.74993
ARFGAP3_S231	1.17827	-0.886857	4.67907	0.000193808	0.000945267	0.271038
PARN_S619	1.17762	-1.10164	4.03464	0.00079784	0.00314795	-1.14421
STBD1_S211	1.17729	-0.653429	3.2242	0.00477407	0.0142436	-2.90617
AKAP13_S1559	1.1772	-1.18091	3.95315	0.00131601	0.00479973	-1.48138
PIKFYVE_S307	1.17691	-0.922786	6.27438	6.91e-06	5.33e-05	3.64301
PARVA_S14	1.17663	-0.430077	2.60427	0.0186806	0.044936	-4.17934
TRIM2_T120	1.17646	0.421333	2.58473	0.0201416	0.0478508	-4.20952
ARHGAP30_S709	1.176	-0.5938	2.77863	0.0150035	0.0372831	-3.61043
TUT4_S209	1.17547	-0.946364	2.89152	0.0113473	0.029435	-3.6087
TMEM51_S192	1.17538	-1.053	3.25135	0.00449854	0.0135406	-2.84832
MICALL1_S309	1.1752	-0.377	4.30876	0.000491698	0.00208447	-0.613181
GAPVD1_S993	1.17496	-0.688929	3.86198	0.00116902	0.00434219	-1.52353
SERPIND1_T66	1.1748	-0.1384	2.96353	0.0104434	0.0275295	-3.46358
GPAM_S688	1.17443	-0.525083	3.33499	0.00427825	0.0129822	-2.71115
DOCK7_S182	1.17404	-0.865143	3.96248	0.000935881	0.00360372	-1.30284
PLEKHA5_S975	1.17403	-0.38025	3.5966	0.0024725	0.00822183	-2.17022
HUWE1_S2593	1.17275	-0.598545	2.85915	0.012111	0.0310918	-3.63945
EPS15L1_S593	1.1724	-0.767091	3.94052	0.00135	0.00490239	-1.50693
KIF1A_S1629	1.17225	-0.37375	4.5578	0.000335802	0.00151265	-0.13456
NHSL2_S500	1.17208	-0.8905	3.74682	0.00223376	0.00754368	-1.91951
PPP2R5A_S42	1.17117	-0.6832	4.75306	0.000324898	0.00147142	0.0251763
LRMP_S371	1.17108	-0.6479	4.10361	0.00111546	0.00417401	-1.22251
PFKFB2_S486	1.17073	-0.440846	3.4665	0.00300768	0.00966504	-2.4131
MAP1A_S1152	1.17067	-0.0464	3.20326	0.00651273	0.0184568	-2.98196
SYNRG_S473	1.1705	-0.6978	3.45974	0.00392701	0.0120956	-2.48176
ARHGAP21_S881	1.17037	-0.617231	4.4781	0.000342912	0.0015402	-0.251554
MAML2_S53	1.1695	-0.701727	3.47077	0.00350229	0.0109677	-2.42521
MARK4_S458	1.16858	-0.539429	2.86631	0.0103736	0.0273599	-3.65541
PHF21A_S448	1.16605	-1.11877	4.71217	0.000209152	0.00100719	0.245909
FKBP15_T1146	1.1656	-0.824714	2.56135	0.0197797	0.0471187	-4.26803
EEPD1_S106	1.1653	-0.591308	2.80957	0.0121926	0.0312655	-3.77321
ADNP_S709	1.16518	-0.736727	4.48676	0.00045318	0.00194822	-0.379217
USP24_T89	1.16512	-0.3796	2.86145	0.0127597	0.032513	-3.45449
HBB_S45	1.16502	-0.558143	2.76625	0.0128451	0.0326892	-3.85946
CELSR1_S2871	1.16437	-0.757538	2.99681	0.00821603	0.0224446	-3.39344
ARHGAP45_S635	1.1635	-0.7098	3.31339	0.00524082	0.0153978	-2.58795
OSBPL6_S369	1.16347	-0.942143	3.86696	0.00115619	0.00430564	-1.51259
SYNJ1_S869	1.16342	-0.330154	4.58427	0.000273865	0.00127437	-0.0255076
PPP2R5A_S41	1.16245	-0.487154	4.56241	0.000286815	0.00132488	-0.0719835
MECP2_S408	1.1624	-0.2402	2.7245	0.0166741	0.0407858	-3.91733
TP53BP1_S1004	1.16171	-0.592214	3.68465	0.00173095	0.00606403	-1.91173
ARVCF_S915	1.16138	-0.66025	2.78352	0.0134419	0.0339722	-3.78156
MARCKSL1_T148	1.16122	-0.5285	4.39503	0.000360546	0.0015991	-0.351533
MAP1B_Y2057	1.161	-0.433818	3.55967	0.00292265	0.00944147	-2.24601
PLEKHA2_T316	1.16063	-1.20675	4.72075	0.00024102	0.00114005	0.199733
MBP_S40	1.16056	-0.440071	2.94988	0.00866719	0.0235114	-3.48298
MAPK4_S434	1.16051	-0.0296429	3.31421	0.00391908	0.0120778	-2.7139
SIPA1L1_S1528	1.15995	-0.898615	4.31281	0.000487467	0.00207263	-0.60452
NUMA1_S1853	1.1592	-0.474	4.49893	0.000287118	0.0013254	-0.123419
C2orf49_S148	1.15806	-0.909333	3.70587	0.00196636	0.00676991	-1.94307
MAP4_S510	1.15716	-0.518286	3.6195	0.00199924	0.00687256	-2.05381
KIAA1211L_S951	1.15625	-0.280833	3.15485	0.00623374	0.0178182	-3.03826
SPTA1_S1284	1.156	-0.514385	2.82248	0.0118668	0.0305389	-3.74727
EEF2K_S27	1.1557	-1.136	3.56791	0.00241747	0.00806862	-2.19792
SNX29_S268	1.15561	-0.803636	4.67952	0.000310354	0.00141541	0.00326336
MAP1A_S384	1.15558	-0.1561	4.02774	0.00129191	0.00472464	-1.3703
RRM2B_S401	1.15547	-0.177	3.06726	0.00672251	0.0189528	-3.23805
[truncated: 6,649 more rows]

## Sheet: AC DEPPs
Phosphoprotein	logFC	AveExpr	t	P.Value	adj.P.Val	B
[truncated: 8,544 more rows]
